# Supplementary material for: Coordinated Gene Family Evolution Shapes the Genome of Dimorphic Organisms
Source: Research Square preprint supplement (doi:10.21203/rs.3.rs-6393820/v1), 2025-04-08
Supplement: Supplementary file 1 [file 0ca789300f43e1f2f0fc5159.pdf]

# Complete, Manhattan (cityblock)

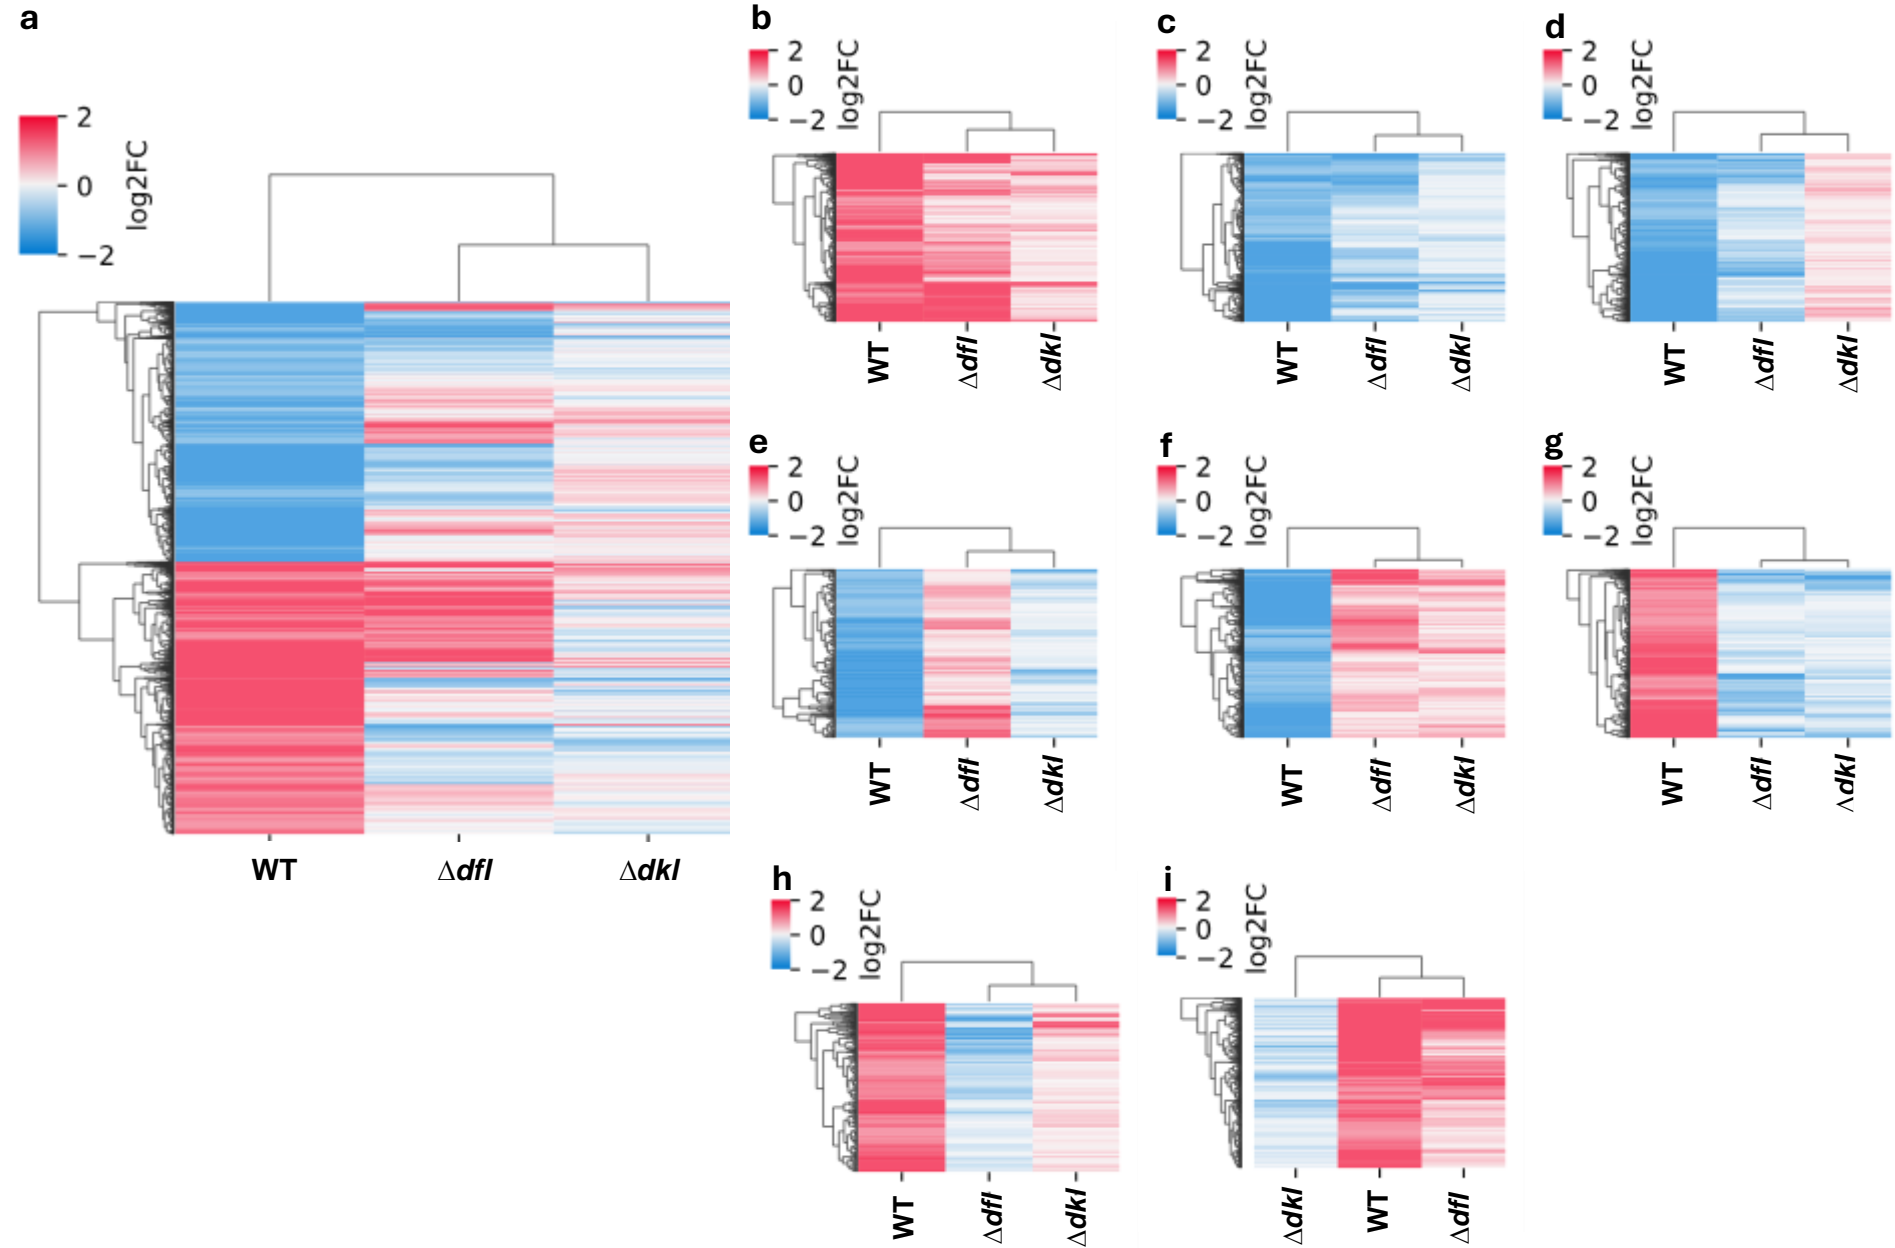

**Supplementary Figure 5. Classification of differentially expressed genes based on  $\log_2$ FC values during reverse transition in the wild-type strain compared to  $\Delta dkl$  and  $\Delta dfl$  mutants.** **a** Heatmap representing dysregulation of all differentially expressed genes during reverse transition in the wild-type strain compared to  $\Delta dkl$  and  $\Delta dfl$  mutants. Genes were clustered based on their expression profiles across conditions. **b** Heatmap of genes upregulated in the wild-type (WT,  $\log_2$ FC  $\geq 1$ ) and showing a positive trend in both  $\Delta dkl$  ( $\log_2$ FC\_dkl  $> 0$ ) and  $\Delta dfl$  ( $\log_2$ FC\_dfl  $> 0$ ) mutants. **c** Heatmap of genes downregulated in WT ( $\log_2$ FC  $\leq -1$ ) and showing a negative trend in both  $\Delta dkl$  and  $\Delta dfl$  mutants. **d** Heatmap of genes downregulated in WT ( $\log_2$ FC  $\leq -1$ ) but showing a negative trend in  $\Delta dfl$  and a positive trend in  $\Delta dkl$ . **e** Heatmap of genes downregulated in WT ( $\log_2$ FC  $\leq -1$ ) but showing a positive trend in  $\Delta dfl$  and a negative trend in  $\Delta dkl$ . **f** Heatmap of genes downregulated in WT ( $\log_2$ FC  $\leq -1$ ) but showing a positive trend in both  $\Delta dkl$  and  $\Delta dfl$ . **g** Heatmap of genes upregulated in WT ( $\log_2$ FC  $\geq 1$ ) but showing a negative trend in both  $\Delta dkl$  and  $\Delta dfl$ . **h** Heatmap of genes upregulated in WT ( $\log_2$ FC  $\geq 1$ ) but showing a negative trend in  $\Delta dfl$  and a positive trend in  $\Delta dkl$ . **i** Heatmap of genes upregulated in WT ( $\log_2$ FC  $\geq 1$ ) but showing a positive trend in  $\Delta dfl$  and a negative trend in  $\Delta dkl$ .
