# Supplementary material for: Coordinated Gene Family Evolution Shapes the Genome of Dimorphic Organisms
Source: Research Square preprint supplement (doi:10.21203/rs.3.rs-6393820/v1), 2025-04-08
Supplement: Supplementary file 1 [file 1f058ffef930246f68a0852e.xlsx]

## Sheet: Total DEGs
YvsPM	YvsMM	RTvsPM										846 elements included exclusively in "List 1":	937 common elements in "List 1" and "List 2":	1645 elements included exclusively in "List 2":	597 common elements in "List 2" and "List 3":	2243 common elements in "List 1", "List 2" and "List 3":	938 common elements in "List 1" and "List 3":	975 elements included exclusively in "List 3":
1555294	1350665	1513531										1000253	1008141	1001405	1006928	1000305	1016555	1000774
1548920	1453734	1535965										1006783	1012669	1003500	1016793	1017362	1028062	1005889
1542395	1477741	1488895										1008270	1015056	1006973	1022753	1018691	1032352	1011519
1504634	1555538	1590735										1008541	1024558	1007498	1031666	1026019	1065447	1016976
1513633	1459582	1515001										1023720	1029479	1008001	1033121	1027173	1079591	1030818
1360710	1565542	1582908										1046273	1030640	1009515	1048581	1029637	1080791	1032959
1456612	1369036	1456584										1055566	1031962	1010138	1065027	1031119	1080982	1036641
1483016	1538902	1444640										1073971	1035320	1014017	1065281	1041163	1085134	1038425
1528797	1590915	1510462										1090090	1053856	1014724	1073034	1041319	1089537	1051461
1535490	1590278	1394045										1090429	1059115	1019023	1079491	1043754	1095389	1063740
1522177	1501848	1480894										1096060	1059254	1019783	1105922	1045599	1137336	1066869
1471729	1519035	1473732										1097240	1061866	1022486	1107476	1054703	1137506	1067283
1518154	1519611	1323143										1100685	1066877	1022826	1115782	1055668	1152014	1068905
1493673	1171205	1365517										1106253	1079374	1025592	1144010	1058589	1158964	1086198
1556764	1540081	1503336										1109246	1088334	1026010	1147435	1058846	1159212	1087891
1547727	1395404	1584900										1110088	1090115	1028052	1156571	1064468	1165760	1095450
1332775	1294740	1535478										1113608	1106431	1028090	1164248	1064571	1172053	1105717
1512612	1464650	1442810										1117019	1110517	1032205	1172080	1068210	1301999	1108023
1526792	1458664	1494253										1119585	1110744	1034771	1177319	1074123	1317116	1113119
1530357	1377002	1533407										1123590	1118177	1035056	1179744	1082848	1320893	1128174
1520518	1528481	1473520										1124858	1120711	1035330	1297275	1087955	1321135	1130901
1497505	1484136	1495030										1125240	1140161	1038382	1305257	1095462	1323213	1142208
1495824	1476281	1518065										1126324	1141391	1042034	1306666	1099113	1323901	1155573
1510280	1538769	1485752										1141588	1144134	1042035	1307227	1105385	1324007	1165324
1454116	1479952	1396098										1150217	1148843	1042271	1321719	1110725	1325533	1166149
1393706	1358995	1453553										1169234	1152884	1045444	1322572	1116047	1326305	1166306
1484346	1392141	1303736										1170661	1153542	1049721	1324589	1128474	1326694	1172608
1533184	1564141	1514323										1172545	1159667	1054460	1325012	1129112	1328601	1174567
1394287	1354449	1459823										1177218	1161672	1056202	1328040	1130616	1330732	1176773
1534202	1508067	1474249										1297765	1169398	1059940	1328137	1134595	1332728	1291394
1562080	1563904	1347194										1297844	1305595	1062176	1329765	1137599	1332775	1293609
1542789	1453214	1505043										1311202	1318131	1062574	1330595	1138061	1334573	1306200
1554918	1511305	1511887										1320650	1319860	1066876	1333389	1140241	1335983	1314402
1497372	1378485	1500385										1323894	1319968	1066979	1334309	1142553	1336014	1321644
1456495	1521542	1522732										1324211	1320314	1068969	1334502	1152264	1340604	1321814
1537495	1511638	1471155										1324426	1320654	1070820	1335868	1156345	1341498	1322923
1521962	1495494	1495322										1324484	1321812	1071190	1338355	1161729	1341530	1323143
1340513	1532776	1590278										1324592	1322359	1072150	1342161	1162314	1342072	1323387
1325554	1470356	1501354										1325087	1323195	1072233	1343115	1163071	1342711	1323750
1478782	1505074	1533158										1325435	1325026	1074021	1343272	1164687	1344170	1324593
1534209	1555371	1386974										1326411	1325974	1079767	1345490	1167480	1345849	1324878
1377472	1516375	1465994										1333881	1326131	1083516	1346345	1176600	1346179	1325814
1458725	1506748	1536395										1333967	1327164	1084071	1347388	1290465	1346320	1325942
1454599	1377029	1489413										1336324	1327299	1087735	1348151	1291525	1347260	1326901
1446094	1446683	1532073										1338377	1330912	1091041	1348566	1303736	1347454	1328507
1452702	1483593	1485224										1338466	1332298	1092864	1349107	1319340	1348102	1329977
1509430	1379354	1538959										1340641	1336120	1096820	1350320	1319384	1348106	1332224
1468593	1348151	1550317										1340681	1336474	1100962	1351855	1320004	1348301	1332793
1480256	1517105	1508743										1344607	1340513	1102636	1352160	1320690	1348421	1334448
1100685	1474878	1509195										1346996	1341565	1103058	1352308	1321045	1349062	1335150
1526748	1551066	1493762										1347570	1343040	1106105	1352604	1321417	1349249	1336652
1551524	1378423	1501350										1347922	1343354	1110797	1352787	1321481	1349376	1337077
1582431	1541431	1538606										1349844	1344997	1119535	1354449	1321691	1349920	1338171
1466743	1537230	1593470										1350315	1345409	1122766	1354579	1321731	1350752	1338322
1513155	1465994	1509693										1350385	1346268	1124575	1355208	1321818	1351079	1339894
1478082	1510975	1525308										1351582	1346466	1127229	1355503	1322491	1351177	1344598
1508170	1340513	1475710										1352963	1346779	1128237	1355516	1322880	1351441	1344610
1601348	1541025	1517631										1353576	1347010	1128859	1357493	1323491	1351799	1344666
1474771	1506917	1599970										1354038	1348032	1131776	1358765	1323604	1351863	1344959
1541961	1539711	1390361										1354233	1350309	1132586	1359464	1324013	1352145	1345227
1590905	1472606	1455837										1354749	1350683	1132811	1360385	1324687	1352156	1345638
1506748	1487293	1474373										1355025	1351494	1137024	1364222	1325554	1352752	1345802
1601209	1461517	1530736										1355113	1351860	1137052	1364399	1326364	1353146	1347007
1479802	1546323	1526943										1355782	1351971	1147477	1365517	1326514	1353499	1347018
1456606	1542987	1489878										1355822	1352372	1147952	1367889	1326522	1354001	1347194
1451557	1595470	1538751										1356070	1353007	1147999	1369475	1326529	1354025	1347831
1462991	1552698	1477148										1356402	1353121	1149678	1370469	1327071	1354411	1347930
1600894	1524574	1513984										1357394	1353195	1150303	1370704	1329483	1354885	1348115
1488411	1536230	1491175										1358715	1354331	1151236	1370916	1330758	1354895	1348686
1085134	1529077	1506418										1358830	1354395	1160645	1370995	1330980	1354963	1349554
1477441	1561330	1535117										1359189	1354679	1161390	1371392	1331398	1355369	1349781
1466541	1363500	1482282										1359571	1354959	1161978	1372420	1332498	1355645	1350069
1531416	1470490	1472491										1360450	1355321	1164253	1373260	1333617	1355982	1350960
1434437	1443664	1481868										1360607	1355586	1171205	1373296	1333678	1356478	1351053
1508628	1478217	1488411										1360612	1356095	1171734	1373664	1333955	1356510	1351314
1468915	1355971	1541522										1362180	1356221	1292105	1374022	1334600	1356532	1351323
1512396	1552026	1592329										1362225	1356314	1294740	1374920	1334980	1357266	1351437
1494314	1501215	1410423										1362497	1357096	1303986	1375047	1334985	1358409	1351491
1583971	1557296	1509616										1362506	1357320	1306538	1375964	1335674	1358498	1352597
1321045	1539543	1475717										1362638	1357753	1312581	1376132	1335829	1358663	1352741
1544476	1477034	1526113										1363054	1359117	1316505	1377029	1335846	1358920	1353135
1488895	1472930	1481879										1363300	1359379	1319647	1378447	1336367	1359484	1353562
1496105	1548640	1459611										1363928	1359587	1319807	1378545	1336444	1359783	1353596
1492702	1360545	1499754										1364104	1359682	1320545	1378819	1337482	1359889	1353851
1465387	1491168	1551879										1364309	1360245	1321074	1378825	1339501	1360481	1355436
1479602	1473606	1522286										1365006	1360470	1321356	1379351	1339505	1361103	1355789
1512774	1487669	1479952										1365138	1361204	1321396	1379509	1339519	1361193	1356076
1506249	1473555	1454648										1365538	1361481	1322160	1380646	1339657	1362057	1356660
1336120	1474771	1500453										1365618	1361789	1322266	1380743	1340256	1362793	1356832
1177218	1522136	1480208										1365813	1362288	1322460	1381604	1341313	1363579	1356905
1524354	1525790	1535577										1365920	1363003	1322597	1381769	1341725	1363706	1356982
1485446	1498328	1449754										1366033	1363977	1323035	1382140	1342193	1363816	1357931
1460383	1355503	1526250										1366148	1364318	1323517	1382688	1342374	1363943	1358118
1369708	1463345	1458093										1366356	1365018	1323600	1383596	1343642	1364807	1358529
1366033	1511573	1051461										1366719	1365292	1324267	1387047	1344596	1365395	1358887
1456603	1358291	1445162										1366857	1365349	1324337	1387380	1346223	1365504	1361034
1538734	1487786	1499159										1367673	1366194	1324359	1387399	1346383	1365588	1361249
1473606	1525227	1596687										1367719	1366687	1324476	1388126	1346523	1366133	1361949
1517363	1518313	1444832										1368492	1367006	1324971	1388838	1346716	1366981	1362017
1485268	1444518	1528708										1369083	1367679	1326827	1390214	1346969	1367223	1362797
1464356	1459350	1542764										1369598	1367844	1327596	1390986	1347030	1367505	1362933
1500319	1492174	1510008										1369708	1368463	1327707	1391134	1347359	1367862	1362981
1375653	1549092	1465817										1370120	1369377	1327779	1391181	1347525	1368227	1363260
1524906	1526573	1444467										1370182	1370040	1327832	1391966	1347700	1368542	1364405
1534694	1510662	1537758										1370615	1370208	1328193	1392386	1347705	1369325	1364688
1459285	1537805	1495150										1370744	1370356	1328400	1392746	1347812	1369872	1365056
1463338	1510917	1348151										1371485	1370793	1328481	1392990	1347822	1370833	1365718
1591267	1587528	1496838										1372654	1371713	1329057	1393315	1347837	1371044	1366471
1390719	1531438	1434436										1372926	1372550	1330460	1394066	1347865	1371386	1366486
1483066	1599050	1511039										1373181	1374170	1330851	1395398	1348231	1371696	1366563
1538065	1523760	1522432										1373811	1374861	1330948	1395526	1348452	1371914	1366693
1458054	1501647	1496417										1373983	1375115	1330982	1395884	1348871	1371978	1367154
1524353	1537217	1466017										1374875	1375399	1331636	1396018	1348925	1372134	1368057
1521125	1476478	1510662										1375619	1375585	1331991	1396455	1348965	1372168	1368152
1466549	1553845	1515727										1376476	1375812	1332087	1407545	1349083	1372613	1368260
1547552	1355556	1517791										1376499	1375836	1332337	1407586	1349257	1372713	1368998
1486511	1599902	1502470										1376629	1376699	1332752	1408048	1349300	1372940	1370267
1541868	1599625	1545481										1377153	1377605	1332759	1409390	1349346	1373480	1373553
1594803	1535320	1550946										1377288	1378081	1333806	1416800	1349367	1373733	1374591
1459350	1541914	1545030										1377358	1378127	1334481	1418025	1349946	1374601	1375039
1504631	1507100	1476281										1377472	1378784	1334891	1418051	1350034	1374885	1375186
1511833	1490378	1483598										1377814	1379179	1335238	1430811	1350043	1375653	1375392
1535323	1548982	1489161										1377842	1379970	1335409	1434436	1350091	1375698	1375481
1502908	1521613	1460272										1377855	1382918	1335643	1434564	1350200	1375715	1375552
1528925	1466463	1539904										1378062	1383244	1336486	1435961	1350265	1376269	1375802
1383337	1466549	1486877										1378462	1383286	1336606	1438176	1350271	1377522	1376164
1172545	1322880	1503451										1379047	1383337	1337122	1438866	1350382	1377562	1376181
1378700	1506743	1455695										1380085	1383835	1337251	1441129	1350393	1377712	1376229
1349844	1579610	1497731										1380598	1384109	1337379	1442139	1350552	1377806	1376283
1459618	1360470	1536367										1380992	1384457	1338060	1442810	1350651	1377954	1377367
1379354	1540221	1366981										1381061	1386241	1338814	1444783	1350746	1378841	1377588
1417603	1532954	1557369										1382285	1386453	1339121	1444832	1351014	1378995	1378111
1541561	1542027	1473880										1382672	1387115	1339149	1445422	1351166	1379184	1378979
1582730	1601195	1113119										1383729	1387688	1339278	1446438	1351554	1379248	1379098
1491090	1509447	1496668										1383759	1387967	1339755	1446476	1351740	1379739	1379212
1464522	1527743	1366471										1384007	1388684	1339933	1446512	1351755	1379809	1379220
1565517	1538665	1503636										1384061	1388883	1340510	1446683	1351920	1379918	1379270
1393057	1160645	1464620										1384157	1388972	1340734	1447448	1352594	1380311	1379339
1519086	1536017	1345227										1385020	1389313	1340809	1447455	1353013	1380357	1380478
1461079	1526361	1461079										1385030	1389618	1341134	1448018	1353183	1381016	1380827
1563853	1466017	1526650										1385353	1390517	1341214	1448038	1353435	1381090	1381038
1501354	1512497	1338322										1385755	1390582	1341254	1448933	1353459	1381438	1381561
1451751	1506418	1526262										1386197	1390719	1341746	1449548	1353724	1382732	1381759
1526509	1350616	1469317										1387547	1392141	1342014	1449754	1353746	1383483	1382031
1490522	1535871	1469958										1388255	1392577	1342066	1450618	1354524	1384066	1382236
1503540	1598591	1469642										1389354	1393075	1342386	1451046	1355173	1384248	1382471
1492742	1483902	1326364										1389448	1393320	1342995	1451158	1355184	1384539	1382830
1514208	1588114	1474953										1389606	1393798	1343225	1451753	1355237	1384775	1383001
1536710	1519623	1533896										1389979	1394110	1343381	1451822	1355596	1384994	1383614
1476619	1481353	1534353										1391099	1394233	1343398	1452738	1355627	1385035	1384257
1109246	1455213	1376181										1391783	1395234	1343417	1453233	1355922	1385063	1384263
1447083	1481432	1592151										1391810	1395561	1344090	1453734	1355971	1385076	1384535
1557296	1590748	1446094										1392216	1395629	1344098	1455120	1356380	1385235	1386076
1556694	1451668	1358118										1392772	1407576	1344172	1455501	1356753	1385460	1386490
1588635	1515826	1508679										1392814	1409085	1344199	1455509	1357157	1385582	1386627
1567159	1472787	1479933										1393057	1410353	1345133	1455521	1357245	1385627	1386776
1570897	1458659	1544476										1393442	1415184	1345897	1456127	1357279	1386412	1386974
1494084	1386939	1325554										1393893	1415883	1345902	1456371	1357504	1386661	1387210
1585851	1393798	1556994										1394287	1416332	1345938	1456489	1357544	1386746	1388546
1463951	1520884	1469871										1396163	1416601	1346373	1456699	1357575	1388043	1389512
1526639	1512915	1597432										1396194	1417175	1346507	1457077	1358140	1389414	1390225
1454558	1350683	1446378										1396363	1417603	1346571	1457138	1358145	1389670	1390361
1551972	1526457	1506308										1409043	1417689	1346588	1457505	1358824	1389865	1390373
1325026	1507485	1439783										1409926	1430444	1346612	1457903	1358871	1389876	1391159
1454648	1516614	1477425										1410908	1431801	1346800	1457987	1359075	1390652	1391253
1452915	1491389	1567970										1411741	1432453	1346962	1458618	1359216	1391758	1391276
1458852	1553411	1511388										1412674	1433443	1347043	1458659	1359239	1392129	1392807
1491599	1523042	1321644										1416742	1436541	1347452	1459363	1359316	1392856	1392826
1385582	1536417	1456612										1430337	1437783	1347481	1459746	1359344	1393706	1393913
1505949	1518596	1471307										1432980	1438416	1347686	1460128	1359553	1393965	1394114
1550058	1487738	1463117										1433763	1439343	1348131	1460200	1360056	1394102	1394171
1525570	1541468	1511238										1434437	1442949	1348192	1460659	1360061	1394652	1394330
1376629	1492020	1519546										1435320	1442994	1348346	1461193	1360264	1394932	1394386
1477972	1539816	1513937										1436138	1445953	1348539	1461236	1360381	1395201	1395723
1597455	1598495	1372566										1437683	1446240	1348608	1461456	1360452	1396025	1396020
1535786	1330595	1501953										1441637	1446346	1348778	1461625	1360545	1396454	1396098
1504289	1536904	1391816										1441683	1446422	1348861	1462485	1360710	1396706	1396264
1588338	1529057	1556435										1442589	1446621	1348890	1462573	1361179	1407819	1396438
1573180	1586659	1454182										1443495	1446829	1348900	1462630	1361258	1411149	1407617
1526457	1502090	1510681										1443806	1447039	1349041	1463003	1361519	1411485	1407619
1525207	1550399	1006928										1444228	1447512	1349328	1463177	1362387	1411847	1408977
1553721	1508679	1566976										1444450	1448086	1349448	1463879	1362444	1416378	1410375
1541938	1473341	1376222										1444752	1448191	1349700	1464336	1362520	1432037	1410423
1513298	1595514	1494676										1444928	1448244	1349755	1464393	1363019	1433212	1411023
1545523	1362740	1516020										1445552	1448262	1349830	1464935	1363237	1434987	1411357
1393075	1590550	1354449										1446434	1448279	1350093	1465130	1363262	1435483	1411518
1479957	1542059	1523042										1446595	1448331	1350209	1465233	1363415	1436003	1411841
1458415	1508241	1493197										1446778	1448407	1350558	1465337	1363500	1437718	1416401
1470163	1518590	1494988										1447083	1448453	1350616	1465573	1364035	1438131	1429968
1391758	1459297	1568343										1447950	1448475	1350665	1465711	1364265	1438486	1431341
1453117	1590312	1520479										1448105	1448560	1350842	1465714	1364327	1439783	1431891
1532362	1522893	1509295										1448552	1448926	1350925	1465848	1364349	1442351	1432833
1500821	1488411	1538335										1448557	1449027	1351086	1465853	1364563	1442409	1434109
1347837	1497730	1494161										1448763	1449387	1351260	1466017	1364659	1442540	1435521
1596404	1456371	1523924										1449495	1450008	1351398	1466382	1364923	1442676	1435721
1479280	1538751	1389761										1450370	1450179	1351540	1466557	1365111	1442683	1436161
1483038	1448300	1555938										1450394	1450323	1351757	1467353	1365180	1442942	1437007
1370120	1510383	1534202										1450817	1450516	1352516	1467686	1365250	1443568	1437129
1465228	1504902	1384491										1451110	1451201	1352670	1468096	1365458	1443725	1437432
1499896	1337122	1349781										1451843	1451592	1353063	1468184	1365502	1443749	1438865
1453519	1387057	1563346										1451908	1451751	1353287	1468199	1365601	1443812	1439124
1526668	1479280	1496560										1452110	1452026	1354087	1468502	1365741	1444183	1441688
1489601	1453906	1374549										1452120	1452060	1354589	1468589	1365808	1444929	1442645
1486164	1463950	1469038										1452591	1452431	1354929	1468748	1366113	1445917	1442768
1501036	1452026	1524906										1452614	1452702	1355022	1468964	1366376	1446075	1442916
1519190	1524353	1473650										1453357	1452915	1355139	1469302	1366549	1446236	1443387
1519928	1307227	1580342										1454016	1452957	1355227	1469384	1366700	1446249	1443494
1590338	1536239	1555118										1454116	1453117	1355261	1469527	1366756	1446319	1444640
1058589	1466403	1510047										1454281	1453237	1355265	1469656	1366939	1446638	1445162
1360470	1585792	1526248										1454618	1453278	1355326	1470957	1367627	1446763	1445276
1320650	1516838	1506972										1454771	1453284	1355556	1471100	1367633	1447255	1445510
1500814	1514737	1464356										1454956	1453474	1355828	1471158	1367826	1447312	1446172
1380311	1543329	1465355										1455312	1453495	1356084	1471233	1368110	1447774	1446491
1458664	1590236	1540873										1456514	1453499	1356192	1471313	1368451	1447828	1446665
1538912	1472443	1407617										1456582	1453519	1356251	1471531	1368475	1448129	1446729
1099113	1483487	1532885										1456589	1453570	1357419	1471575	1368742	1448945	1446951
1566726	1490101	1463879										1456594	1453614	1357487	1472582	1368755	1448947	1446993
1544849	1459364	1509686										1456606	1453711	1357712	1473004	1369212	1448965	1447031
1468868	1563230	1565843										1456718	1453722	1357832	1473983	1369295	1449048	1447814
1551656	1481868	1374157										1457107	1453744	1357858	1474926	1369414	1450353	1448073
1470203	1479771	1368057										1457357	1453987	1358291	1475730	1369466	1451021	1448381
1540325	1561808	1370267										1457722	1453998	1358995	1475866	1369521	1452803	1448895
1552698	1500821	1451840										1457743	1454471	1359020	1475897	1369584	1453008	1449220
1487682	1452983	1505949										1458415	1454558	1359486	1476013	1369688	1453124	1449510
1474136	1522286	1497243										1458457	1454599	1359712	1476168	1369983	1453222	1449775
1455898	1451046	1585792										1458461	1454737	1359901	1476642	1370017	1453374	1449949
1464175	1458727	1459227										1458605	1454930	1359997	1476979	1370097	1453482	1449979
1553903	1525316	1487360										1458631	1455014	1360018	1477565	1370118	1453733	1451026
1530667	1585292	1506211										1458792	1455193	1360022	1477568	1370463	1453784	1451206
1514323	1445786	1470806										1459131	1455204	1360275	1477596	1370696	1454005	1451543
1354749	1476963	1546398										1459280	1455336	1360320	1477741	1370719	1454122	1451707
1526250	1568343	1465387										1459285	1455676	1360356	1477841	1370951	1454548	1451754
1481172	1453233	1528168										1459618	1455764	1360378	1477945	1371135	1454607	1451780
1456594	1495030	1476125										1459809	1456497	1360410	1477986	1372056	1454648	1451817
1351860	1542591	1353596										1459993	1456528	1360444	1478217	1372100	1454803	1451930
1500825	1395526	1568122										1460410	1456599	1360445	1478382	1372126	1455299	1452191
1095462	1441941	1505659										1460415	1456632	1360559	1478401	1372410	1455347	1452715
1464386	1501269	1593046										1460610	1457029	1360939	1479113	1372558	1455413	1452985
1540682	1531416	1552366										1460628	1457453	1361146	1479218	1372563	1455558	1453067
1466816	1442266	1548293										1460663	1457466	1361183	1479242	1372566	1455898	1453091
1542756	1592329	1513095										1461072	1458054	1361253	1479643	1372594	1456495	1453297
1365588	1490309	1544172										1461339	1458157	1361543	1479771	1373133	1456584	1453422
1378462	1553950	1554937										1461409	1458619	1361616	1479794	1373145	1456603	1453479
1518822	1471701	1519928										1461968	1458664	1361940	1479952	1373222	1456624	1453553
1134595	1545480	1511602										1462103	1458725	1362081	1480121	1373264	1456858	1453713
1442683	1434436	1380311										1462408	1458748	1362083	1480169	1373392	1456947	1453869
1505420	1416800	1388838										1462606	1458787	1362740	1480645	1373618	1457119	1453933
1491389	1537650	1503047										1463130	1459031	1362921	1481182	1373768	1457179	1454083
1457441	1529472	1549807										1463199	1459427	1362943	1481383	1373830	1457263	1454113
1449387	1519092	1532615										1463294	1459789	1363063	1481788	1373922	1457334	1454137
1516247	1490047	1359239										1463394	1459906	1363289	1481799	1374032	1457561	1454265
1539778	1480314	1453067										1463557	1460102	1363436	1481806	1374041	1457599	1454395
1473555	1526830	1489593										1463582	1460204	1364809	1481868	1374151	1457627	1454556
1490457	1526613	1569558										1463941	1460368	1364873	1482149	1374157	1458170	1454622
1324211	1524831	1505851										1464175	1460397	1365027	1482556	1374232	1458460	1454657
1538601	1523480	1594776										1464304	1460446	1365109	1482707	1374421	1458634	1454962
1468445	1539826	1505841										1464628	1460595	1365382	1482728	1374450	1458934	1455023
1547071	1460082	1459199										1464633	1460641	1365450	1483228	1374549	1459140	1455329
1504213	1499283	1525526										1464774	1461112	1365532	1483265	1374824	1459153	1455401
1535877	1523846	1457367										1465228	1461125	1365802	1483330	1375001	1459199	1455664
1564132	1490156	1506005										1465482	1461375	1365835	1483431	1375147	1459338	1455695
1538902	1384109	1381695										1465636	1461448	1365841	1483452	1375416	1459775	1455821
1412833	1489878	1456603										1465679	1461576	1366387	1483511	1375628	1459783	1455837
1552208	1552366	1368451										1465708	1461672	1366537	1483567	1375680	1459818	1455858
1494247	1502638	1471100										1465731	1462131	1367058	1483739	1375711	1459902	1456005
1538346	1541961	1518310										1465833	1462442	1367255	1483902	1376005	1460003	1456873
1523130	1417689	1330595										1465870	1463338	1367326	1484025	1376222	1460103	1457367
1066877	1451840	1534235										1466053	1463407	1367601	1484981	1376440	1460142	1457537
1324687	1494836	1469749										1466198	1463501	1368368	1485484	1376525	1460235	1457591
1511052	1491730	1371696										1466340	1463599	1368535	1485516	1376789	1460272	1457686
1350265	1522998	1538254										1466356	1463849	1368652	1485973	1376807	1460431	1457797
1117019	1494432	1504044										1466411	1463888	1368751	1486117	1376907	1460458	1458093
1043754	1550775	1536497										1466530	1463991	1368883	1486358	1376994	1460464	1458175
1497041	1356251	1550851										1466541	1464312	1369036	1486525	1377103	1460475	1458542
1489413	1481607	1599527										1466945	1464386	1369147	1486827	1377156	1460633	1458615
1395201	1511477	1446476										1467026	1464522	1369921	1486877	1377346	1460753	1458626
1073971	1497041	1129112										1467079	1464661	1369978	1487511	1377456	1460890	1458765
1524040	1453917	1481178										1467132	1464744	1370343	1487522	1377489	1460907	1459009
1371135	1526062	1582767										1467304	1464812	1370913	1487738	1377833	1460957	1459013
1510726	1590905	1536058										1467558	1465331	1371143	1487915	1377941	1461057	1459193
1535871	1371776	1596676										1467759	1465869	1371527	1488869	1378100	1461079	1459499
1466198	1499526	1461840										1468053	1465948	1371530	1489514	1378134	1461199	1459510
1497461	1455834	1471537										1468356	1466403	1371776	1489770	1378177	1461290	1459652
1368463	1515196	1466758										1468406	1466422	1372059	1489916	1378276	1461336	1459823
1553719	1354579	1492209										1468417	1466543	1372401	1490098	1378526	1461558	1460379
1455336	1554061	1513889										1468593	1466604	1372492	1490101	1378572	1461633	1460454
1546030	1006928	1329765										1468637	1467007	1372523	1490156	1378586	1461671	1460729
1520891	1378825	1495297										1468705	1467110	1372529	1490261	1378700	1461798	1460748
1528747	1496694	1534463										1468868	1467688	1372666	1490309	1378752	1461850	1460952
1505835	1489770	1546030										1468886	1467693	1373582	1490639	1378888	1462138	1461049
1462131	1557156	1506138										1469018	1467875	1373746	1490846	1379354	1462238	1461124
1513552	1528353	1469075										1469197	1468220	1373776	1491545	1379840	1462341	1461302
1555854	1513688	1577111										1469221	1468258	1374048	1491679	1380177	1463314	1461449
1396361	1521313	1455858										1469227	1468290	1374243	1492355	1380607	1463336	1461567
1463557	1587720	1474944										1469809	1468343	1374460	1492984	1380639	1463491	1461648
1531359	1487100	1495588										1469921	1468346	1374463	1493274	1381032	1463493	1461828
1550399	1535877	1502487										1469935	1468445	1374570	1493377	1381205	1463601	1462061
1476312	1480256	1522990										1470026	1468749	1374693	1493821	1381482	1463775	1462074
1480271	1513955	1464498										1470163	1468879	1375246	1493849	1381524	1463802	1462079
1545481	1510008	1382830										1470187	1468915	1375469	1494326	1381695	1463806	1462423
1510662	1479505	1432579										1470271	1468929	1375710	1495030	1381758	1463871	1462983
1448475	1494823	1538758										1470431	1468968	1375940	1495303	1381800	1463895	1463013
1008541	1542774	1520276										1471125	1468972	1376077	1495435	1381926	1463951	1463096
1537805	1517342	1474781										1471210	1469826	1376086	1495537	1382080	1464356	1463211
1541103	1510681	1536721										1471849	1469869	1376167	1495588	1382431	1464498	1463755
1364807	1343398	1447814										1471890	1470203	1376571	1495980	1382617	1464505	1463999
1551875	1503192	1466031										1471942	1470338	1377002	1496232	1382775	1464941	1464215
1526973	1585553	1358920										1472194	1470515	1377042	1496258	1382908	1465093	1464285
1489186	1466816	1552459										1472219	1470743	1377098	1496317	1383246	1465100	1464418
1517235	1592638	1536057										1472681	1470959	1377429	1496512	1383313	1465218	1464620
1601362	1588714	1460748										1472690	1471074	1377508	1496560	1383462	1465240	1464660
1478318	1496950	1516037										1473169	1471373	1377870	1496940	1383492	1465371	1464797
1538633	1452288	1453869										1473523	1471793	1378007	1497189	1383724	1465397	1464828
1505395	1487529	1522452										1473560	1471814	1378072	1497276	1384074	1465721	1465035
1489813	1480645	1502484										1473564	1472410	1378249	1497484	1384361	1466015	1465208
1545030	1554544	1486463										1473635	1472606	1378313	1497581	1384491	1466371	1465308
1492174	1546254	1499013										1473727	1472724	1378423	1498157	1384651	1466518	1465317
1536721	1510080	1377029										1473818	1473219	1378485	1498481	1384767	1466758	1465320
1387688	1513473	1525238										1474136	1473376	1378989	1499296	1385014	1466776	1465355
1496886	1548886	1495508										1474403	1473606	1379347	1500273	1385506	1467033	1465384
1317116	1453570	1467686										1474509	1473647	1379602	1500340	1385798	1467188	1465559
1537650	1323491	1544319										1474735	1473898	1379674	1500553	1385889	1467380	1465980
1548593	1472850	1538895										1474767	1473944	1379837	1500601	1386443	1467556	1466008
1593020	1557293	1380639										1475249	1473992	1380211	1500865	1386462	1467678	1466056
1459427	1486181	1487915										1475350	1474215	1380227	1501457	1386575	1467960	1466272
1522709	1365450	1517363										1475834	1474441	1380467	1501640	1386647	1468031	1466482
1597496	1601118	1481253										1476093	1474666	1380523	1501647	1386918	1468830	1466586
1566395	1517258	1466820										1476269	1474672	1380612	1501715	1387164	1468849	1466588
1532631	1493821	1514830										1476377	1474686	1380664	1502034	1387328	1468873	1466808
1539234	1341134	1359216										1476540	1474771	1381006	1502272	1387432	1468936	1466820
1599902	1527731	1483805										1476868	1474860	1381556	1502484	1387697	1469072	1466834
1588339	1446132	1500825										1476912	1475150	1381900	1503047	1387748	1469160	1466895
1533864	1468087	1474126										1477373	1475255	1381902	1503693	1387974	1469947	1466963
1480908	1365517	1452978										1477441	1475458	1382021	1504641	1388116	1470027	1467105
1453906	1496940	1526861										1477485	1475563	1382242	1505841	1388182	1470085	1467316
1372940	1551283	1531906										1477816	1475859	1382313	1505851	1388477	1470178	1467320
1366148	1510097	1456495										1477972	1475924	1383457	1506100	1389137	1470386	1467345
1556822	1474227	1525227										1478332	1476051	1383626	1506418	1389541	1470767	1467378
1464312	1596060	1500009										1478896	1476131	1383935	1506711	1389679	1471105	1467419
1531745	1475924	1375186										1478969	1476307	1384036	1506917	1389761	1471307	1468017
1363579	1556669	1589367										1478980	1476416	1384657	1507076	1390055	1471822	1468060
1482282	1565747	1451780										1479193	1476439	1384833	1507205	1390474	1471900	1468423
1453214	1586680	1537805										1479384	1476619	1385661	1507313	1390768	1471964	1468499
1487776	1480133	1501186										1479527	1476754	1385726	1507441	1390831	1472060	1468639
1564493	1531533	1541540										1479548	1476804	1385863	1507946	1391043	1472659	1468730
1452120	1538346	1540227										1479780	1476831	1385881	1508382	1391229	1472920	1469038
1530932	1524651	1491545										1480088	1477345	1385957	1508679	1391247	1472998	1469070
1515151	1534771	1524442										1480268	1477368	1386150	1508749	1391285	1473028	1469075
1546569	1485583	1483787										1480544	1477776	1386239	1509106	1391804	1473738	1469642
1382918	1454737	1490469										1480556	1478082	1386293	1509382	1391816	1473780	1469871
1550023	1524444	1016555										1480700	1478208	1386343	1509623	1391899	1473810	1469931
1540221	1593046	1453784										1480783	1478318	1386749	1510155	1391973	1473889	1470152
1389606	1590178	1557296										1480908	1478342	1386854	1510317	1392021	1474213	1470251
1565747	1568349	1470940										1481455	1478497	1386939	1510383	1392067	1474264	1470277
1512714	1538869	1587591										1481463	1478782	1386950	1510681	1392095	1474406	1470354
1541548	1555442	1384074										1481514	1478813	1387057	1510801	1392327	1474409	1470833
1539792	1482738	1507946										1481969	1478867	1387063	1511393	1392393	1474498	1470940
1505034	1461029	1323491										1482749	1479353	1387181	1511573	1392552	1475239	1471012
1360545	1453344	1360545										1482781	1479529	1387290	1511596	1392716	1475445	1471082
1550389	1601348	1493384										1482868	1479574	1387299	1512014	1392991	1475614	1471086
1463849	1531697	1487776										1483016	1480256	1387305	1512068	1393292	1475642	1471155
1540227	1461576	1497041										1483038	1480271	1387352	1512084	1393736	1475916	1471320
1514836	1532369	1525295										1483482	1480913	1387587	1512207	1393754	1475956	1471543
1522286	1458911	1485471										1483579	1480992	1387838	1512664	1393994	1476275	1471653
1450817	1459760	1487273										1484346	1481353	1388014	1512810	1394045	1476301	1471717
1358409	1459427	1482688										1484801	1481419	1388400	1512846	1394117	1476312	1471963
1504362	1534524	1346523										1484826	1481432	1388447	1512902	1394253	1476547	1472491
1385020	1566886	1463802										1485268	1481697	1388510	1513147	1394291	1476707	1472605
1466597	1467115	1541561										1485445	1481706	1388805	1513440	1394405	1476748	1472615
1499016	1074123	1465130										1485531	1482180	1388816	1513646	1394518	1476756	1473020
1532954	1330460	1369414										1486091	1482184	1388821	1513820	1395063	1476805	1473244
1538758	1506605	1502597										1486164	1482230	1389450	1513937	1395134	1476915	1473371
1461576	1540612	1541103										1486351	1482376	1389517	1514380	1395147	1476952	1473520
1509434	1446165	1484409										1486398	1482916	1389636	1514501	1395371	1477027	1473732
1595698	1079374	1382431										1486511	1483066	1389682	1514830	1395496	1477137	1474016
1598008	1548293	1508107										1486686	1483321	1389743	1515040	1395610	1477151	1474126
1595738	1095462	1515838										1486885	1483544	1389831	1515041	1395733	1477157	1474373
1452118	1512664	1468027										1487070	1483794	1389923	1515118	1395834	1477768	1474418
1534892	1502039	1490156										1487095	1483918	1389995	1515258	1395857	1477967	1475598
1511510	1538091	1520475										1487239	1484053	1390052	1515552	1395861	1478086	1475710
1519035	1540977	1362933										1487284	1484351	1390197	1515675	1396117	1478202	1475750
1510080	1600988	1477877										1487336	1484484	1390506	1515830	1396139	1478245	1476125
1563925	1509616	1465100										1487407	1484524	1390733	1515851	1396361	1479128	1476395
1451840	1446787	1548593										1487538	1484590	1390810	1515977	1396611	1479178	1476436
1506005	1518350	1455761										1487600	1484609	1391444	1516544	1407531	1479203	1476967
1597432	1536220	1542059										1487663	1485083	1391507	1516659	1407661	1479266	1477039
1515093	1553434	1480919										1487793	1485415	1391565	1517465	1407718	1479358	1477142
1600344	1454642	1485446										1487934	1485498	1391658	1517478	1410392	1479580	1477148
1528708	1534247	1467102										1488326	1485518	1391698	1518065	1410737	1479854	1477233
1515216	1463879	1317116										1488348	1485923	1391998	1518111	1410938	1480069	1477295
1542322	1370463	1522407										1488444	1485936	1392018	1518310	1411855	1480123	1477423
1466403	1500307	1480169										1488681	1485987	1392103	1518363	1412731	1480333	1477627
1360450	1483452	1519850										1488855	1486638	1392195	1518395	1412833	1480706	1477828
1541431	1534483	1505520										1488944	1486980	1392237	1518466	1413544	1481020	1478322
1586271	1482725	1592584										1489129	1486987	1392278	1518590	1414357	1481053	1478338
1515454	1528940	1504506										1489280	1487255	1392316	1519518	1414504	1481165	1478508
1486335	1460621	1466785										1489870	1487262	1392593	1519911	1414621	1481195	1478607
1446422	1506211	1545195										1490457	1487296	1392687	1520259	1416449	1481348	1478875
1016555	1458619	1527731										1490477	1487304	1392894	1520455	1430967	1481470	1478958
1517631	1513147	1468060										1490522	1487342	1393096	1521461	1431000	1481877	1479222
1499362	1566381	1332775										1490871	1487478	1393405	1521545	1431310	1482139	1479426
1528739	1513937	1534694										1491069	1487485	1393483	1521908	1431483	1482282	1479494
1538546	1592410	1506083										1491431	1487529	1393696	1521990	1432107	1482455	1479787
1459199	1502487	1388126										1491448	1487656	1394464	1522251	1432513	1483184	1480095
1535025	1493939	1483511										1491449	1487669	1394564	1522662	1432579	1483235	1480168
1461112	1496792	1453132										1491583	1488520	1394626	1523146	1432641	1483241	1480254
1509686	1500133	1492174										1491681	1488549	1395154	1523296	1433155	1483497	1480355
1476546	1518466	1594222										1492227	1488557	1395292	1523452	1433346	1483598	1480451
1585792	1348452	1360481										1492515	1488994	1395404	1524645	1433625	1483665	1480453
1547052	1538895	1597111										1492926	1489118	1395537	1524693	1435031	1484050	1480494
1469921	1553721	1480453										1493192	1489139	1395579	1524740	1435987	1484154	1480778
1355596	1457836	1375964										1493455	1489285	1395916	1524831	1436628	1484195	1480819
1469317	1526118	1506720										1493569	1489430	1396433	1524855	1436868	1484321	1480945
1365349	1595325	1468639										1493955	1489486	1407259	1525127	1437161	1484820	1481016
1489486	1531727	1506100										1493979	1489534	1407491	1525227	1437973	1484963	1481178
1460410	1510285	1549803										1494029	1489644	1407587	1525229	1437982	1485225	1481243
1471694	1118177	1513904										1494035	1489672	1407791	1525472	1438082	1485455	1481294
1378784	1559754	1355645										1494052	1490225	1408309	1525950	1439461	1485486	1481333
1391783	1467494	1523903										1494084	1490244	1409111	1526037	1439947	1485491	1481447
1442949	1486572	1548630										1494314	1490373	1409218	1526148	1440527	1485927	1481899
1551879	1547989	1528379										1494359	1490375	1409690	1526361	1440666	1486386	1481958
1474403	1320004	1537332										1494412	1490392	1409830	1526678	1441627	1486670	1482101
1482688	1488474	1345638										1494565	1490508	1410380	1526739	1442255	1487273	1482125
1512122	1350925	1592234										1494617	1490916	1410471	1527030	1442309	1487429	1482171
1453784	1566395	1466588										1494703	1490974	1410577	1527171	1442352	1487441	1482283
1502350	1330982	1540825										1494762	1491090	1410655	1527272	1442365	1487590	1482920
1555118	1520529	1548886										1494782	1491389	1410782	1527735	1442573	1487968	1483001
1593475	1454866	1353459										1495315	1491589	1411049	1527911	1442702	1488334	1483006
1528940	1460742	1434987										1495975	1491770	1411219	1527921	1442967	1488435	1483071
1522024	1568192	1551605										1496380	1491777	1411258	1528032	1443216	1488544	1483414
1461558	1540187	1524693										1496831	1492192	1411709	1528089	1443910	1488663	1483766
1439343	1147435	1503313										1496886	1492242	1412116	1528161	1444037	1488672	1483805
1125240	1521209	1533700										1497211	1492358	1413418	1528290	1444133	1488753	1483861
1494320	1367326	1553980										1497332	1492448	1413485	1528447	1444251	1488980	1483982
1497653	1555226	1396361										1497461	1492669	1414394	1528692	1444314	1489122	1484045
1509693	1325554	1471230										1497505	1492702	1416617	1529156	1444467	1489161	1484230
1525847	1557120	1543933										1497574	1493422	1416796	1529534	1444471	1489186	1484257
1373811	1539904	1439124										1497641	1493495	1417078	1529695	1444763	1489493	1484833
1471822	1491597	1387748										1497644	1493662	1417931	1529849	1445145	1489501	1484843
1536423	1597455	1515258										1497788	1493752	1417950	1530213	1445692	1489540	1485224
1503379	1484818	1491188										1498158	1493772	1429877	1530244	1445765	1489593	1485369
1350315	1548536	1548664										1498345	1494033	1430338	1530260	1445835	1489669	1485631
1493670	1499207	1535314										1498373	1494230	1431171	1531020	1446094	1490130	1485752
1392141	1389743	1595395										1498488	1494268	1431177	1531425	1446136	1490323	1486068
1487255	1579262	1500273										1498606	1494420	1431886	1531718	1446167	1490377	1486323
1533581	1476979	1499042										1499016	1494428	1431978	1531727	1446176	1490560	1486463
1489285	1543432	1566677										1499362	1494432	1432167	1531793	1446187	1490625	1486502
1456582	1485929	1539579										1499495	1494799	1432825	1531815	1446232	1490787	1486810
1477027	1511393	1345802										1499658	1494823	1433203	1531906	1446329	1490923	1486817
1527913	1341313	1455413										1499840	1494966	1433487	1533253	1446378	1491096	1486989
1482142	1555852	1492344										1500084	1495413	1433594	1533661	1446561	1492468	1487360
1467102	1474119	1541468										1500164	1495645	1434243	1533732	1446740	1492564	1487364
1323901	1467647	1601348										1500319	1495824	1434513	1534857	1447092	1492764	1487572
1531533	1446187	1468942										1500809	1495925	1434808	1535181	1447121	1492989	1487887
1491681	1448926	1456371										1500814	1495999	1435136	1535297	1447330	1493003	1488635
1513955	1512912	1593020										1500854	1496105	1435482	1535409	1447366	1493009	1488643
1442255	1371713	1545200										1501025	1496176	1435842	1535708	1447547	1493019	1488688
1538869	1516720	1446951										1501107	1496324	1435913	1536009	1447902	1493143	1488876
1509116	1444471	1529143										1501522	1496361	1436344	1536011	1447956	1493285	1488999
1356095	1534004	1537763										1501740	1496432	1436483	1536224	1448051	1493435	1489134
1453237	1489285	1567261										1501776	1496847	1437232	1536367	1448092	1493740	1489424
1540081	1478932	1324593										1502298	1496950	1437947	1537727	1448109	1493946	1489450
1523329	1597432	1487511										1502319	1496978	1438826	1537939	1448143	1493949	1489517
1501186	1590826	1457537										1502350	1496982	1438879	1538254	1448200	1494018	1489745
1446236	1551349	1459338										1502870	1497209	1439679	1538719	1448348	1494525	1489763
1026019	1435987	1446683										1503008	1497730	1439813	1538751	1448693	1494637	1489836
1541728	1474946	1466963										1503112	1498047	1439908	1539579	1448712	1494676	1489840
1510394	1561494	1512179										1503379	1498084	1439925	1539684	1448896	1494884	1490342
1471125	1489413	1546649										1503540	1498246	1440052	1539882	1449029	1495122	1490469
1491448	1492330	1533482										1503619	1498542	1440217	1540169	1449310	1495306	1491293
1529059	1465898	1481933										1503701	1499162	1440856	1540406	1449594	1495792	1491458
1448947	1497484	1432641										1503805	1499189	1441725	1540425	1449632	1496261	1491729
1463582	1496121	1475916										1503924	1499207	1441941	1540750	1449740	1496749	1492004
1471701	1442352	1530357										1504180	1499548	1442266	1540977	1449776	1497033	1492087
1492288	1523903	1440666										1504195	1499672	1442407	1541142	1449798	1497406	1492230
1533896	1520813	1507673										1504242	1499826	1442563	1541468	1450601	1497542	1492285
1593957	1496512	1448038										1504289	1499830	1442612	1541540	1450682	1497659	1492652
1527738	1465341	1489299										1504353	1499870	1442680	1542059	1450694	1497952	1492673
1463806	1547169	1515675										1504386	1499896	1442722	1542139	1450974	1497955	1492706
1481432	1459874	1481607										1504602	1500133	1443004	1542407	1451144	1498002	1493031
1491617	1516704	1549036										1504631	1500174	1443092	1542417	1451329	1498221	1493054
1505043	1507076	1451930										1504634	1500307	1443103	1542607	1451517	1498689	1493149
1525393	1472825	1483982										1504804	1500477	1443186	1542653	1451557	1498798	1493368
1535320	1467686	1555442										1505034	1500561	1443303	1542693	1451569	1498941	1493384
1504195	1516544	1517945										1505401	1500568	1443321	1542703	1451573	1498945	1493550
1371713	1472582	1516031										1505536	1500821	1443664	1542781	1451656	1499023	1493575
1551529	1433594	1531865										1505558	1501024	1443685	1543073	1451738	1499341	1493578
1510579	1451333	1479957										1505577	1501036	1443791	1543079	1451834	1499364	1493697
1479933	1469958	1483452										1505835	1501103	1443968	1543918	1451840	1499410	1493745
1560124	1493690	1509580										1505922	1501215	1444287	1544172	1452006	1499536	1493826
1350309	1387047	1362017										1505953	1501856	1444358	1544877	1452029	1499565	1493865
1459338	1453519	1467502										1505972	1501861	1444359	1545208	1452112	1499656	1493931
1505393	1503636	1348686										1506014	1502016	1444518	1545787	1452118	1499666	1493950
1599537	1507205	1456873										1506249	1502578	1444527	1546084	1452128	1499979	1494123
1537230	1432641	1501781										1506327	1502606	1444712	1546233	1452214	1500024	1494161
1343354	1407718	1535323										1507480	1502908	1444803	1546527	1452228	1500129	1494186
1361103	1595114	1545304										1507880	1502989	1445047	1546573	1452288	1500271	1494219
1507880	1546840	1498052										1507952	1503128	1445105	1546843	1452460	1500312	1494451
1594522	1551529	1172608										1508167	1503308	1445333	1547036	1452857	1500328	1494575
1367006	1532428	1556564										1508170	1503662	1445338	1547057	1452924	1500586	1494898
1538476	1505476	1539204										1508246	1503770	1445357	1547394	1452939	1500625	1495154
1447039	1455846	1503673										1508628	1503785	1445386	1547489	1452978	1500672	1495241
1483593	1516247	1525438										1508685	1504162	1445399	1547543	1453071	1500721	1495263
1453284	1332759	1497484										1509024	1504694	1445525	1547995	1453076	1500888	1495268
1522452	1464925	1332224										1509430	1504902	1445686	1548202	1453132	1501186	1495322
1469018	1465344	1588338										1509434	1504990	1445711	1548886	1453214	1501312	1495438
1387115	1529859	1045599										1509538	1505100	1445786	1549724	1453248	1501689	1495571
1393994	1363003	1496877										1509638	1505107	1445789	1549775	1453250	1501781	1496113
1595301	1515675	1358409										1510043	1505112	1445903	1550019	1453344	1502021	1496234
1496694	1509553	1510547										1510162	1505298	1445938	1550067	1453515	1502125	1496369
1496950	1449479	1542796										1510280	1505393	1446091	1550163	1453569	1502260	1496529
1375619	1536670	1416401										1510293	1505412	1446132	1550270	1453576	1502740	1496668
1481253	1458725	1475598										1510631	1505529	1446156	1550301	1453634	1502874	1496835
1499666	1478813	1456955										1510721	1505672	1446165	1550775	1453651	1502983	1496889
1486181	1490974	1458659										1510726	1506167	1446213	1551146	1453654	1503098	1497153
1460753	1501272	1547893										1510816	1506373	1446347	1551209	1453663	1503213	1497662
1534351	1463338	1498713										1511166	1506464	1446440	1551513	1453742	1503243	1497670
1482072	1502077	1543410										1511318	1506562	1446501	1552035	1453776	1503343	1498092
1493455	1545030	1484195										1511360	1506604	1446565	1552366	1453879	1503358	1498154
1525308	1474872	1489424										1511378	1506643	1446575	1552466	1453906	1503383	1498425
1494823	1548844	1540977										1511510	1506748	1446754	1552616	1453992	1503598	1498610
1526248	1486264	1506917										1511844	1507069	1446755	1553228	1454092	1503830	1498671
1464744	1546030	1460475										1511861	1507090	1446787	1553950	1454125	1503961	1498674
1553861	1547187	1462485										1512028	1507096	1447080	1553980	1454143	1504178	1498868
1588698	1343354	1533414										1512098	1507471	1447272	1553990	1454182	1504188	1499013
1472606	1392746	1495241										1512122	1507703	1447345	1554198	1454398	1504213	1499061
1513579	1526509	1335868										1512331	1507905	1447387	1554205	1454879	1504295	1499225
1523940	1491813	1506031										1512522	1508028	1447536	1554438	1454892	1504408	1499434
1516020	1526423	1467678										1512612	1508067	1447584	1554714	1455197	1504786	1499448
1472924	1510745	1459297										1512764	1508505	1447730	1554857	1455227	1505093	1499567
1481697	1557012	1567473										1512806	1509010	1447868	1555308	1455318	1505111	1499754
1519623	1495508	1535422										1512985	1509116	1448161	1555368	1455497	1505399	1499850
1526068	1502080	1372940										1513029	1509288	1448224	1555442	1455513	1505420	1500087
1517492	1514830	1575802										1513155	1509420	1448225	1555909	1455546	1505703	1500298
1470187	1541460	1513887										1513552	1509558	1448245	1556604	1455582	1505782	1500385
1487407	1493623	1484566										1513557	1509730	1448300	1557012	1455761	1505798	1500453
1436541	1484739	1476979										1513633	1509978	1448367	1557125	1455762	1505949	1500644
1490974	1505851	1467119										1513652	1510087	1449292	1557302	1455797	1506022	1500696
1515732	1457505	1152264										1513875	1510092	1449386	1557440	1455834	1506118	1501447
1511318	1360275	1469542										1513881	1510097	1449479	1557928	1455846	1506138	1501971
1359216	1512774	1373768										1514208	1510146	1449619	1559860	1455850	1506181	1502071
1568343	1490639	1591235										1514318	1510270	1449623	1560071	1455904	1506452	1502284
1596676	1303736	1491223										1514403	1510534	1450169	1562358	1455994	1506460	1502548
1599213	1448225	1411357										1514461	1510844	1450769	1563815	1456020	1506660	1502616
1535117	1172080	1516659										1514503	1511098	1450791	1564141	1456043	1506726	1502628
1494988	1547052	1517350										1514522	1511194	1451333	1564765	1456120	1506854	1502724
1551863	1522407	1390986										1515151	1511399	1451355	1565542	1456131	1506877	1503050
1520494	1544770	1557012										1515216	1511544	1451532	1566107	1456274	1507010	1503136
1523934	1456862	1490101										1515521	1511764	1451546	1567453	1456375	1507289	1503150
1592058	1476168	1510394										1515665	1511829	1451638	1568192	1456379	1507374	1503336
1587010	1596585	1599721										1515712	1511833	1451668	1569535	1456382	1507609	1503373
1387967	1461956	1489186										1515724	1511958	1451796	1571983	1456482	1507697	1503436
1460628	1416617	1478217										1516348	1512080	1451962	1572928	1456510	1508224	1503451
1527938	1479521	1540946										1516535	1512218	1452065	1578093	1456576	1508237	1503459
1549036	1485669	1407531										1516830	1512295	1452377	1580727	1456612	1508379	1503673
1541735	1550754	1498798										1517067	1512307	1452728	1582496	1456622	1508544	1503833
1543329	1500477	1498868										1517075	1512396	1452879	1582539	1456627	1508835	1504032
1584571	1586172	1442255										1517215	1512500	1452967	1582976	1456642	1509476	1504072
1321818	1468343	1463347										1517492	1512527	1452983	1583435	1456862	1509494	1504506
1482725	1534351	1480592										1517688	1512999	1453011	1585553	1456931	1509686	1504511
1409926	1487915	1518466										1518154	1513041	1453269	1586244	1456955	1509693	1504596
1456862	1359216	1329977										1518232	1513058	1453917	1586387	1456973	1509699	1504975
1593123	1485446	1532554										1518302	1513712	1453986	1586462	1457033	1509711	1505143
1521108	1537668	1519792										1518552	1513926	1453995	1586608	1457096	1509823	1505267
1459993	1391134	1467142										1518748	1513949	1454129	1586680	1457102	1509904	1505547
1464628	1502144	1452288										1518794	1513990	1454192	1588146	1457129	1509909	1505643
1394102	1507078	1394171										1518994	1514203	1454240	1589202	1457249	1510157	1505659
1519540	1485344	1512810										1519190	1514283	1454249	1589859	1457293	1510284	1505826
1563619	1487976	1519910										1519581	1514624	1454542	1590178	1457376	1510501	1506083
1539914	1431801	1493645										1519592	1514836	1454575	1590278	1457381	1510839	1506135
1532073	1560289	1549737										1519815	1514941	1454577	1591657	1457441	1510933	1506145
1516976	1395398	1524147										1520062	1515090	1454587	1592329	1457521	1511039	1506153
1453278	1486877	1544182										1520987	1515093	1454642	1592466	1457528	1511052	1506294
1552528	1509442	1377367										1521047	1515196	1454779	1593046	1457570	1511163	1506308
1460272	1525273	1336652										1521094	1515242	1454866	1594222	1457700	1511196	1506315
1510631	1458814	1496940										1521389	1515732	1455114	1594519	1457807	1511602	1506616
1407531	1453986	1564724										1521443	1515886	1455213	1594973	1457816	1511781	1506720
1460475	1374920	1460729										1521536	1515892	1455232	1595237	1457883	1512327	1506970
1512999	1448262	1392746										1521864	1516013	1455290	1595344	1457928	1512416	1506972
1542027	1383337	1498940										1522421	1516139	1455340	1595581	1457964	1512663	1507113
1540825	1487511	1506435										1522539	1516145	1455360	1595812	1458012	1512677	1507224
1481195	1366387	1494501										1522660	1516150	1455517	1597266	1458022	1513023	1507686
1549732	1492742	1547561										1522709	1516247	1456299	1597347	1458100	1513261	1507859
1453344	1500825	1481470										1522858	1516403	1456394	1598001	1458113	1513893	1507861
1161672	1458787	1564141										1523285	1516406	1456399	1598245	1458152	1513904	1507873
1383492	1557002	1542247										1523329	1516443	1456501	1598495	1458211	1514140	1508083
1471942	1536851	1467549										1523700	1516704	1456609	1598510	1458302	1514164	1508107
1460610	1553541	1589881										1523754	1516804	1456870	1598711	1458539	1514297	1508638
1356402	1331398	1502080										1523794	1516997	1456920	1598769	1458586	1514391	1508829
1483598	1586713	1497047										1524158	1517004	1456923	1599050	1458607	1514606	1509195
1355645	1322597	1475999										1524242	1517048	1457236	1599625	1458814	1515105	1509284
1527123	1529062	1497476										1524354	1517232	1457384	1600178	1458852	1515115	1509483
1499159	1456609	1314402										1524506	1517330	1457533	1600620	1458917	1515228	1509626
1510008	1454542	1459429										1524756	1517519	1457562	1601032	1459002	1515715	1509912
1534483	1463699	1516976										1524758	1517680	1457564	1601118	1459025	1515787	1509917
1497476	1498920	1514880										1524865	1517699	1457566	1601195	1459039	1515854	1510047
1598342	1538775	1539098										1524882	1518044	1457836	1601487	1459184	1515923	1510388
1446240	1164687	1460633										1525060	1518196	1458306		1459227	1516043	1510411
1554843	1459429	1459775										1525221	1518596	1458464		1459294	1516976	1510462
1528511	1568382	1517174										1525570	1518822	1458592		1459297	1517149	1510554
1540477	1343417	1459746										1525847	1519035	1458727		1459350	1517174	1510814
1485518	1366549	1513521										1525957	1519086	1458754		1459378	1517252	1510824
1448557	1519847	1494320										1525960	1519222	1458911		1459389	1517363	1511228
1490923	1521196	1444783										1526069	1519540	1459189		1459411	1517558	1511240
1479384	1525610	1547052										1526201	1519623	1459204		1459429	1518094	1511388
1554927	1544172	1444929										1526377	1519907	1459364		1459498	1518294	1511887
1384061	1516015	1476756										1526665	1520079	1459582		1459565	1518454	1511994
1539719	1532073	1522510										1526748	1520159	1459760		1459611	1518464	1512079
1556645	1545777	1543930										1527123	1520335	1459874		1459691	1518532	1512344
1541565	1519635	1463006										1527299	1520470	1460082		1459886	1519199	1512349
1450370	1594519	1138061										1527441	1520784	1460277		1460297	1519340	1512425
1537172	1480797	1526973										1527777	1520891	1460357		1460308	1519794	1512432
1359239	1476439	1457591										1527938	1521125	1460392		1460370	1519829	1512794
1449632	1600630	1479266										1528118	1521186	1460702		1460383	1520042	1512988
1566886	1477565	1539147										1528296	1521542	1460742		1460530	1520052	1513027
1372056	1448038	1543227										1528331	1521613	1461029		1460621	1520126	1513266
1458605	1455762	1512084										1528698	1521783	1461052		1460646	1520228	1513372
1333881	1476619	1493368										1528797	1522024	1461068		1460757	1520376	1513521
1522655	1563925	1583042										1529059	1522029	1461394		1461009	1520479	1513887
1526062	1394564	1503358										1529199	1522030	1461420		1461143	1520511	1513969
1525421	1512084	1373296										1529807	1522255	1461467		1461192	1520518	1513977
1532545	1527030	1467320										1529836	1522434	1461483		1461324	1520695	1513984
1346996	1586688	1531020										1529864	1522478	1461511		1461395	1520795	1514145
1483482	1520466	1355596										1529949	1522556	1461517		1461402	1520803	1514234
1475717	1552100	1544877										1530031	1522630	1461571		1461490	1521825	1514594
1468924	1525295	1528724										1530191	1522655	1461584		1461561	1522091	1514657
1477959	1499609	1522738										1530387	1523036	1461781		1461684	1522177	1514873
1474953	1521440	1142208										1530619	1523561	1461943		1461755	1522210	1514880
1522421	1495543	1537826										1530769	1523825	1461956		1461833	1522275	1514895
1474946	1567547	1554895										1530791	1523934	1462044		1461840	1522447	1515029
1123590	1387115	1553685										1530932	1523940	1462137		1461869	1522644	1515603
1487070	1570897	1356905										1531023	1524351	1462169		1461935	1522738	1515846
1500133	1468027	1463336										1531041	1524353	1462773		1462183	1522990	1515865
1504365	1440527	1510284										1531060	1524444	1462823		1462414	1523127	1516037
1491790	1467142	1562135										1531586	1524574	1463115		1462426	1523144	1516363
1508067	1463463	1516978										1531626	1524594	1463605		1462617	1523320	1516399
1460458	1452957	1492087										1532105	1524788	1463699		1462629	1523396	1516932
1595325	1465968	1479959										1532242	1524900	1463877		1462738	1523474	1516978
1456931	1476931	1535708										1532362	1525016	1463923		1462870	1523507	1517002
1495297	1466473	1531069										1532456	1525053	1463950		1462919	1523568	1517094
1533378	1582431	1492222										1532507	1525142	1463983		1462957	1523712	1517122
1393798	1600344	1477741										1532545	1525275	1464183		1462991	1523817	1517246
1531888	1458464	1538893										1532631	1525393	1464209		1463006	1523848	1517381
1523794	1598065	1599753										1533184	1525774	1464327		1463020	1523928	1517646
1541025	1084071	1526062										1533581	1525918	1464414		1463022	1523996	1517659
1355586	1090115	1470378										1533864	1526022	1464539		1463117	1524249	1517791
1457263	1483511	1328507										1533916	1526068	1464820		1463175	1524577	1517800
1469863	1442680	1550273										1534261	1526584	1464925		1463208	1524599	1517945
1541952	1538050	1492004										1534363	1526639	1465101		1463224	1524768	1518235
1364035	1551531	1522854										1534393	1527242	1465166		1463295	1524906	1518325
1505112	1462485	1000774										1534408	1527512	1465341		1463345	1525012	1518329
1464650	1544839	1475623										1534455	1527608	1465485		1463347	1525042	1518332
1512295	1552914	1544106										1534504	1527738	1465840		1463369	1525119	1518555
1350271	1539491	1479246										1534840	1527817	1465898		1463385	1525207	1518749
1485455	1526973	1349300										1534892	1527875	1465946		1463463	1525308	1518991
1527875	1417603	1522721										1534908	1527882	1465968		1463710	1525383	1519041
1382775	1548977	1508638										1535316	1527913	1466081		1463790	1525421	1519193
1484566	1444783	1488643										1535605	1528036	1466161		1463924	1525458	1519217
1452431	1539820	1531727										1535786	1528319	1466190		1464015	1526373	1519231
1498713	1527913	1536220										1535886	1528476	1466334		1464200	1526436	1519613
1585418	1595344	1515208										1536684	1528823	1466397		1464326	1526513	1519735
1544755	1348032	1531815										1536729	1529472	1466463		1464352	1526638	1519850
1535886	1521108	1322572										1536870	1529591	1466473		1464428	1526668	1520002
1311202	1361179	1351491										1536877	1529614	1466522		1464477	1526742	1520688
1586768	1588874	1016976										1537232	1529691	1466795		1464509	1526841	1521050
1554832	1589857	1526283										1538065	1529859	1466916		1464650	1527068	1521100
1477877	1552403	1454083										1538481	1530118	1467111		1464663	1527089	1521215
1509408	1553073	1471313										1538546	1530220	1467309		1464670	1527407	1521457
1522091	1364349	1490923										1538633	1530425	1467647		1464949	1527577	1521524
1548293	1498434	1552573										1538935	1530667	1467754		1465088	1528025	1521655
1586050	1378276	1595301										1539479	1531335	1467865		1465108	1528165	1521722
1516443	1540674	1522662										1539778	1531364	1468066		1465138	1528351	1521837
1521260	1446438	1514391										1539792	1531416	1468650		1465157	1528592	1522078
1480913	1456699	1498893										1540366	1531510	1468763		1465255	1528612	1522164
1522275	1563619	1599171										1540403	1531690	1468907		1465344	1528708	1522432
1496706	1550058	1545523										1540454	1531721	1468920		1465353	1528714	1522510
1488557	1473979	1550023										1540682	1531798	1469161		1465376	1528739	1522530
1600988	1475336	1526037										1540822	1531818	1469537		1465387	1528747	1522721
1485531	1515657	1497189										1540940	1531888	1469614		1465479	1529143	1522728
1560289	1564720	1473979										1541241	1532147	1470356		1465504	1529177	1522732
1501350	1446422	1585857										1541548	1532163	1470437		1465569	1529426	1522844
1384109	1374549	1456973										1541717	1532375	1470497		1465615	1529531	1522854
1500307	1523405	1487682										1541868	1532418	1470620		1465656	1529719	1522908
1465833	1532295	1508104										1541952	1532423	1470783		1465736	1529855	1522968
1507480	1512396	1521461										1542057	1532434	1471094		1465738	1530130	1523377
1504353	1503047	1462074										1542223	1532635	1471333		1465817	1530136	1523496
1512497	1551499	1470825										1542395	1532793	1471817		1465858	1530357	1523924
1457722	1468066	1496792										1542789	1532879	1471831		1465892	1530582	1524511
1365920	1389995	1128474										1542807	1532895	1471833		1465994	1530891	1525065
1458619	1547727	1368998										1543084	1532954	1471857		1466031	1531102	1525287
1556444	1537987	1508401										1543620	1533010	1472229		1466041	1531250	1525371
1323894	1363063	1491206										1543622	1533160	1472267		1466162	1531371	1525379
1503924	1551422	1536931										1543817	1533178	1472387		1466174	1531515	1525463
1499283	1415184	1556665										1544059	1533187	1472443		1466194	1531951	1525526
1358920	1538476	1095389										1544069	1533533	1472485		1466266	1532187	1525758
1494253	1484425	1550775										1544304	1533801	1472558		1466364	1532543	1525793
1543223	1041163	1482725										1544569	1534004	1472618		1466398	1533263	1526262
1484484	1475999	1528747										1544666	1534221	1472651		1466470	1533687	1526350
1568132	1582767	1535465										1544852	1534524	1472783		1466527	1533727	1526430
1540403	1393075	1516544										1545368	1534771	1472787		1466549	1533794	1526538
1557265	1519518	1526019										1545542	1535063	1472825		1466597	1533835	1526650
1547040	1506643	1466371										1545967	1535074	1472830		1466743	1534202	1526861
1507157	1494428	1482372										1546138	1535163	1472850		1466785	1534282	1526943
1393320	1450601	1483567										1546169	1535320	1472930		1466816	1534289	1527413
1407576	1492295	1058589										1546248	1535741	1472995		1466826	1534694	1528168
1465344	1350393	1550041										1546569	1535864	1473331		1466878	1534741	1528188
1474944	1481539	1545099										1546606	1536065	1473341		1467081	1534994	1528281
1415184	1386293	1536480										1546834	1536357	1473416		1467102	1535025	1528379
1459789	1536395	1471694										1546937	1536417	1473532		1467115	1535216	1528724
1531721	1482072	1507157										1547048	1536423	1473547		1467119	1535223	1528790
1393893	1580255	1590000										1547832	1536710	1473789		1467142	1535323	1528800
1375836	1562843	1480095										1547980	1536873	1473832		1467323	1535416	1528818
1538606	1553220	1529022										1548209	1537144	1474014		1467350	1535478	1529022
1008141	1524744	1461648										1548221	1537230	1474024		1467427	1535568	1529337
1555759	1529528	1507078										1548320	1537376	1474119		1467472	1535577	1529588
1462103	1374243	1548062										1548377	1537445	1474227		1467478	1535679	1529742
1525438	1066876	1509553										1548496	1537699	1474496		1467494	1535789	1529765
1518596	1519792	1540880										1548713	1537815	1474587		1467502	1536058	1530149
1512307	1502470	1519613										1548871	1537822	1474690		1467506	1536541	1530268
1519546	1348231	1544868										1548920	1538073	1474878		1467507	1536790	1530441
1469315	1555503	1556695										1549393	1538080	1474933		1467536	1536931	1530624
1539479	1540477	1490787										1549495	1538134	1475199		1467539	1537158	1530633
1532165	1482728	1567818										1549646	1538143	1475342		1467549	1537172	1530736
1501776	1479044	1504365										1549867	1538145	1475425		1467657	1537364	1530926
1467079	1519939	1592466										1550122	1538148	1475449		1467740	1537462	1531272
1541342	1491404	1522998										1550402	1538212	1476101		1468027	1537705	1531596
1551538	1600178	1480064										1550490	1538215	1476110		1468050	1537758	1531886
1597478	1502034	1499434										1550833	1538263	1476268		1468087	1537763	1532033
1515813	1582496	1594519										1551235	1538346	1476478		1468170	1538086	1532205
1563907	1599530	1489441										1551296	1538476	1476963		1468191	1538335	1532615
1520784	1520824	1372056										1551425	1538734	1477034		1468263	1538711	1532810
1432641	1374041	1535181										1551524	1538769	1477043		1468448	1538766	1532885
1326305	1580282	1538436										1551538	1538869	1477271		1468507	1539234	1533014
1523700	1498940	1370704										1551656	1538902	1477490		1468674	1539249	1533158
1490787	1449776	1530634										1551698	1538912	1477579		1468741	1539496	1533482
1463895	1335674	1521837										1551875	1539312	1477799		1468924	1539565	1533566
1446763	1375940	1446236										1551972	1539719	1477803		1468942	1539587	1533663
1494268	1375964	1556669										1552208	1539724	1477934		1468947	1539894	1533665
1495306	1451751	1347359										1552528	1539789	1478359		1469013	1539914	1533799
1589857	1351855	1511994										1553282	1539798	1478492		1469208	1540227	1534064
1535577	1471729	1507692										1553539	1539816	1478509		1469315	1540588	1534065
1595114	1541540	1463345										1553583	1539852	1478913		1469317	1540839	1534224
1346523	1530379	1504641										1553630	1540081	1478932		1469352	1541103	1534235
1504248	1601191	1480778										1553854	1540144	1478938		1469359	1541114	1534662
1323213	1487522	1555171										1553865	1540362	1478984		1469364	1541465	1534919
1506031	1547437	1460621										1554112	1540477	1479505		1469542	1541708	1534957
1460204	1471094	1522002										1554216	1540483	1479544		1469599	1541938	1535000
1501025	1539579	1539496										1554798	1540586	1479639		1469624	1541958	1535285
1481607	1360378	1531886										1554843	1540670	1479759		1469749	1541969	1535314
1544870	1471537	1522644										1554855	1540848	1479847		1469848	1542151	1535402
1499364	1515830	1350382										1554918	1541025	1479860		1469863	1542322	1535407
1564720	1411855	1518235										1554927	1541309	1479971		1469926	1542350	1535422
1303736	1531815	1533665										1555294	1541342	1480133		1469958	1542425	1535465
1470806	1507313	1507061										1555562	1541431	1480198		1470048	1542756	1535704
1384007	1598342	1513579										1555650	1541554	1480199		1470073	1542766	1535868
1502470	1522761	1492764										1555746	1541565	1480314		1470195	1542796	1535961
1559769	1485385	1348452										1555750	1541735	1480649		1470240	1543114	1535965
1541114	1383492	1540325										1555847	1541823	1480877		1470357	1543118	1535966
1471793	1558683	1540221										1555854	1541836	1480970		1470378	1543787	1536057
1469749	1508401	1598001										1555884	1542027	1481033		1470490	1544084	1536480
1486552	1035320	1516408										1556444	1542392	1481595		1470520	1544162	1536497
1555551	1484936	1465711										1556499	1542413	1481600		1470801	1544178	1536522
1549867	1465387	1537364										1556764	1542576	1481679		1470806	1544182	1536658
1519340	1476546	1598495										1556822	1542591	1481759		1470825	1544446	1536707
1468929	1496500	1501647										1556949	1542782	1481816		1471195	1544457	1536862
1335674	1530017	1363500										1557143	1542972	1481929		1471230	1544476	1537116
1523903	1477986	1474747										1557277	1543245	1482414		1471342	1544659	1537332
1509223	1461112	1498967										1557426	1543334	1482501		1471459	1544849	1537474
1504044	1566336	1517258										1557876	1543401	1482738		1471474	1545195	1537826
1492209	1537483	1470152										1559769	1543640	1482805		1471537	1545523	1538140
1350683	1524645	1453344										1559980	1543667	1483069		1471544	1545529	1538166
1536723	1012669	1461828										1560760	1544317	1483141		1471652	1545806	1538783
1498052	1488702	1457987										1562080	1544755	1483298		1471694	1545955	1538893
1485471	1542472	1595344										1562323	1544839	1483487		1471701	1546064	1538959
1498246	1524693	1503243										1562998	1545524	1483491		1471729	1546442	1539127
1534771	1580646	1357575										1563426	1545638	1483493		1471988	1546727	1539147
1497406	1493673	1524855										1563907	1545795	1484017		1471990	1546961	1539204
1539496	1554438	1434109										1564081	1545819	1484021		1472017	1547028	1539707
1488681	1510146	1601442										1564132	1546038	1484136		1472085	1547090	1539833
1542796	1548310	1364035										1564493	1546177	1484152		1472235	1547402	1540005
1506138	1453237	1527131										1564503	1546216	1484232		1472258	1547552	1540036
1492344	1550301	1467507										1565517	1546377	1484339		1472337	1547830	1540208
1507069	1339657	1551809										1565625	1547018	1484387		1472378	1547893	1540873
1460633	1469848	1456627										1565926	1547040	1484425		1472422	1548523	1540880
1551615	1540825	1462957										1566458	1547199	1484504		1472588	1548815	1540964
1508028	1070820	1095462										1566519	1547219	1484522		1472596	1548855	1540993
1153542	1507061	1448947										1566709	1547275	1484542		1472698	1548996	1541087
1352156	1530667	1512774										1566897	1547503	1484936		1472727	1549036	1541105
1517486	1560124	1515813										1567869	1548301	1484966		1472924	1549305	1541364
1491583	1476051	1537172										1568050	1549515	1484983		1473027	1549569	1541435
1469848	1478318	1483184										1569131	1549534	1484996		1473055	1549723	1541522
1489161	1484504	1456622										1571774	1549701	1485295		1473061	1549816	1541740
1376476	1494316	1482072										1577904	1549732	1485366		1473065	1549880	1541819
1527743	1554682	1486989										1579035	1550058	1485385		1473157	1549940	1541865
1549803	1541022	1361193										1580768	1550399	1485549		1473161	1550023	1541943
1323491	1502606	1499567										1581495	1550550	1485660		1473174	1550041	1542121
1532369	1496962	1518111										1582730	1551092	1485663		1473228	1550104	1542150
1566519	1453278	1464352										1582751	1551253	1485669		1473364	1550141	1542247
1465994	1346588	1557921										1584118	1551405	1485754		1473385	1550236	1542318
1557921	1407661	1504295										1584509	1551529	1485755		1473419	1550311	1542431
1458787	1565065	1510388										1584753	1551863	1485929		1473442	1550389	1542483
1490560	1456612	1522091										1584864	1552100	1485943		1473464	1550612	1542614
1546913	1486866	1130901										1585522	1552246	1486058		1473476	1550851	1542764
1321812	1476298	1162314										1585888	1552564	1486067		1473555	1550946	1542794
1454182	1477043	1495543										1586480	1552589	1486260		1473620	1551795	1542919
1547048	1552269	1470085										1586768	1552708	1486264		1473650	1552029	1543060
1552100	1596964	1463895										1586774	1552830	1486266		1473711	1552111	1543070
1494029	1520034	1544870										1586848	1552914	1486420		1473869	1552420	1543219
1480919	1350309	1375039										1587196	1553049	1486469		1473880	1552631	1543227
1364309	1501856	1539833										1587461	1553370	1486572		1473979	1552635	1543288
1539816	1491466	1546923										1587567	1553563	1486576		1474008	1552926	1543351
1410737	1518142	1476168										1587627	1553721	1486720		1474160	1553319	1543702
1545756	1450791	1459498										1588316	1553732	1486844		1474222	1554288	1543933
1502487	1548062	1588874										1588635	1553861	1486866		1474249	1554817	1544017
1557426	1591501	1533732										1588698	1553967	1486930		1474382	1554882	1544020
1478813	1546953	1463211										1589282	1554284	1486960		1474423	1554937	1544080
1507010	1336486	1541364										1589649	1554507	1487288		1474507	1555071	1544106
1524636	1494320	1523377										1590298	1554544	1487450		1474578	1555118	1544135
1494432	1456375	1550718										1590996	1554823	1487579		1474747	1555493	1544154
1552564	1499896	1375628										1591267	1554832	1487666		1474755	1555727	1544203
1392216	1531020	1344610										1591578	1554959	1487712		1474781	1555759	1545200
1469947	1481205	1529474										1592058	1555151	1487743		1474846	1555889	1545290
1596687	1497276	1504362										1592134	1555551	1487786		1474872	1556694	1546146
1446778	1321818	1464215										1592191	1556474	1487976		1474944	1556695	1546223
1152264	1456127	1526668										1592481	1556653	1488474		1474946	1556825	1546372
1546754	1488860	1504213										1592848	1556763	1488691		1474953	1556829	1546398
1462442	1535409	1554714										1593117	1556846	1488702		1474962	1557283	1546506
1491188	1354589	1375552										1593319	1556854	1488860		1475228	1557351	1546512
1515090	1517680	1493695										1594522	1557120	1488884		1475329	1557395	1546744
1444929	1453742	1432833										1594929	1557153	1488953		1475336	1557664	1546906
1453132	1367826	1599050										1595698	1557166	1489127		1475433	1557673	1546923
1392552	1447039	1474755										1595950	1557265	1489324		1475623	1557680	1547020
1492222	1066877	1393706										1596152	1557359	1489389		1475717	1557821	1547235
1584359	1457096	1445145										1596648	1557630	1489536		1475875	1557921	1547431
1361193	1539724	1535416										1597426	1557658	1489541		1475880	1558376	1547561
1498798	1592603	1512912										1597442	1560124	1489690		1475943	1559481	1547594
1362057	1531186	1453214										1597478	1560227	1489845		1475999	1559584	1547635
1513531	1500614	1526457										1597496	1560228	1490047		1476147	1560519	1547697
1533700	1531244	1483497										1597965	1560289	1490378		1476152	1561927	1547714
1506562	1536098	1541961										1598942	1561039	1490437		1476281	1561991	1547765
1513904	1549377	1589202										1599415	1562197	1490465		1476298	1562381	1547815
1478980	1510092	1552664										1599520	1562251	1490708		1476430	1563235	1548028
1503243	1459498	1329483										1600638	1562953	1490934		1476484	1563346	1548061
1526830	1464386	1488635										1600894	1566063	1491117		1476501	1563383	1548068
1340604	1387748	1455904										1600907	1566088	1491168		1476510	1563853	1548308
1567970	1501715	1480123										1601333	1566105	1491404		1476546	1563956	1548623
1467549	1507069	1509699											1566336	1491432		1476551	1564581	1548630
1500809	1542231	1487429											1566879	1491454		1476625	1565792	1548664
1468087	1456931	1357544											1567917	1491566		1476808	1566726	1548672
1478363	1552096	1533987											1568065	1491578		1476866	1566810	1548709
1509616	1584109	1340604											1569097	1491760		1476875	1566976	1548851
1556695	1464744	1593123											1570432	1491813		1476892	1567025	1548897
1118177	1346373	1525371											1570595	1492020		1476918	1567159	1549303
1532147	1454577	1535810											1571957	1492156		1476931	1568089	1549314
1380598	1510037	1565542											1571975	1492253		1476934	1568132	1549742
1597902	1530351	1416800											1572488	1492295		1477069	1570453	1549791
1524147	1460357	1529855											1575436	1492300		1477078	1573180	1549807
1546840	1491589	1391758											1575623	1492330		1477099	1575428	1550273
1372566	1547995	1555759											1576042	1492602		1477123	1575802	1550279
1533801	1496877	1499410											1577550	1492697		1477165	1577111	1550284
1487669	1477490	1396025											1577715	1492996		1477264	1579282	1550718
1521783	1533700	1584359											1578119	1493017		1477364	1579918	1550907
1568087	1347822	1509223											1578572	1493059		1477376	1580342	1551095
1089537	1469863	1394518											1579272	1493623		1477391	1582667	1551373
1387164	1532355	1443494											1579610	1493732		1477404	1583069	1551605
1491431	1587010	1541938											1579641	1493764		1477425	1583730	1551722
1473818	1496428	1384066											1580255	1493939		1477449	1583950	1551840
1512179	1521461	1437007											1581301	1494316		1477472	1584040	1551896
1545967	1526557	1179744											1581405	1494345		1477496	1584571	1551944
1462617	1493059	1536522											1581619	1494462		1477598	1584923	1551951
1129112	1527624	1526430											1582431	1494530		1477825	1585126	1552258
1474249	1525655	1480797											1582517	1494635		1477875	1585128	1552264
1474441	1510579	1518576											1583552	1494836		1477877	1585857	1552517
1539098	1417078	1535409											1583971	1495276		1477953	1586347	1553343
1518142	1365841	1592347											1584109	1495281		1477959	1586714	1553685
1512764	1470825	1594666											1584601	1495417		1478111	1586808	1554078
1517350	1474496	1496113											1585180	1495540		1478363	1586863	1554506
1497047	1527813	1593722											1585418	1495671		1478463	1586864	1554895
1535478	1497946	1547995											1585462	1496096		1478500	1587029	1554912
1555884	1452431	1502034											1585612	1496121		1478604	1587041	1555082
1470073	1390986	1557680											1585644	1496254		1478733	1587470	1555127
1522478	1517465	1558819											1586271	1496373		1478759	1587537	1555171
1510146	1598614	1477875											1586495	1496500		1478934	1587591	1555288
1465817	1586050	1507776											1586609	1497217		1479044	1588108	1555563
1503140	1515838	1383492											1586659	1497231		1479095	1588338	1555938
1512912	1473547	1599801											1587010	1497398		1479187	1588845	1556435
1499826	1055668	1482791											1587351	1497478		1479208	1588961	1556493
1459031	1471793	1386443											1588339	1497797		1479246	1589547	1556540
1532163	1536516	1530582											1589520	1497946		1479258	1590174	1556665
1464633	1518044	1472582											1589529	1498232		1479280	1590338	1556679
1534908	1479759	1391181											1589857	1498328		1479391	1590792	1556840
1549701	1554205	1594973											1590114	1498493		1479417	1591077	1557113
1501781	1516659	1336014											1590301	1498497		1479497	1592817	1557367
1556669	1553370	1395398											1590905	1498536		1479521	1593020	1557834
1363943	1452118	1551944											1590915	1498717		1479543	1593045	1558819
1477425	1497189	1540193											1591290	1498854		1479602	1593123	1558964
1320004	1329765	1507010											1591585	1498909		1479670	1593168	1561229
1503358	1497581	1463951											1591924	1498920		1479802	1593326	1561440
1534261	1513579	1563312											1591989	1499053		1479835	1593957	1561469
1579262	1589202	1493690											1592059	1499258		1479933	1594339	1562135
1486351	1494635	1507076											1592918	1499300		1479947	1594440	1563177
1470271	1547569	1536707											1592979	1499303		1479948	1594672	1563415
1365813	1545916	1524636											1593223	1499526		1479957	1594967	1563606
1521613	1540946	1531359											1593413	1499609		1479959	1595018	1564724
1498967	1471100	1524831											1593427	1499749		1479982	1595084	1565554
1512080	1525142	1369295											1593471	1499904		1479994	1595301	1565843
1599753	1455014	1484257											1593475	1500105		1480015	1595512	1566001
1361179	1500174	1364807											1593501	1500466		1480064	1596022	1566677
1596274	1500273	1596732											1593963	1500487		1480110	1596305	1567261
1480592	1359464	1556840											1594149	1500594		1480140	1596437	1567280
1533407	1465946	1479521											1594213	1500712		1480201	1596525	1567473
1568122	1534209	1334448											1594373	1500967		1480208	1596547	1567818
1551809	1389682	1456862											1594458	1501177		1480340	1596676	1569260
1528118	1552520	1134595											1594502	1501272		1480448	1596687	1569326
1479266	1496105	1599625											1595034	1501516		1480592	1596865	1570019
1586774	1498959	1536658											1595114	1501738		1480596	1596883	1570074
1500174	1388838	1597879											1595218	1501848		1480634	1596977	1570876
1536395	1558884	1011519											1595325	1502039		1480695	1597699	1573078
1357575	1387967	1521108											1595569	1502090		1480797	1597821	1573454
1523127	1552664	1492742											1595683	1502144		1480879	1597839	1576427
1530662	1179744	1600525											1595738	1502171		1480894	1597902	1577121
1158964	1396361	1517235											1596028	1502256		1480919	1598008	1579075
1543830	1525833	1563815											1596404	1502304		1481061	1598220	1579495
1540946	1467502	1490639											1596776	1503067		1481123	1598298	1580489
1473560	1374463	1463755											1596935	1503119		1481172	1598382	1580771
1458457	1321045	1500721											1598271	1503192		1481205	1598922	1583042
1382431	1583735	1478363											1598342	1503235		1481253	1599171	1583336
1484409	1465840	1554198											1599215	1503431		1481290	1599213	1583700
1511477	1387432	1326522											1599537	1503772		1481364	1599218	1583949
1519988	1505841	1515096											1599618	1503780		1481539	1599721	1584148
1476804	1586271	1535285											1599902	1503950		1481607	1599753	1584190
1549940	1532165	1447448											1600344	1504155		1481704	1599758	1585446
1496962	1530634	1506886											1600367	1504770		1481772	1599792	1585609
1501606	1444832	1483593											1601124	1504791		1481879	1599801	1586123
1475350	1537727	1395134											1601272	1504888		1481893	1600413	1586208
1503343	1520670	1026019											1601319	1505074		1481933	1600607	1586411
1506036	1357712	1490714											1601359	1505098		1482072	1601209	1588237
1547199	1473832	1473174												1505476		1482099	1601362	1588400
1526613	1480913	1468499												1505811		1482142		1589367
1459131	1494420	1477404												1506194		1482264		1589881
1466785	1516451	1493673												1506334		1482274		1590735
1326694	1487419	1513147												1506578		1482333		1591235
1335983	1485936	1510732												1506663		1482372		1592151
1355321	1499826	1464941												1506743		1482382		1592211
1563346	1387688	1513266												1506846		1482436		1592234
1503808	1479957	1495792												1507100		1482579		1592347
1467119	1485059	1554912												1507217		1482594		1592584
1499204	1582507	1482728												1507485		1482659		1592585
1526113	1512999	1095450												1507599		1482688		1593051
1358830	1491545	1514737												1507670		1482725		1593722
1515715	1496373	1502260												1507700		1482760		1593805
1519910	1408048	1519518												1508089		1482782		1594173
1518576	1490846	1461798												1508130		1482791		1594191
1482791	1505395	1483176												1508214		1482860		1594666
1461840	1490714	1387164												1508657		1483128		1594770
1128474	1523130	1466816												1509316		1483176		1594776
1505672	1492890	1471822												1509366		1483268		1594999
1461072	1368742	1099113												1509395		1483422		1595125
1489129	1598001	1541162												1509398		1483557		1595395
1462183	1595391	1291394												1509447		1483593		1595550
1550833	1371135	1479835												1509480		1483648		1595590
1479246	1526019	1479771												1509666		1483768		1596619
1439783	1522014	1551499												1509737		1483776		1596732
1460397	1520494	1547235												1510037		1483787		1597077
1353459	1446240	1484739												1510503		1484004		1597832
1106253	1153542	1537650												1510551		1484040		1598381
1435987	1536423	1506711												1510684		1484069		1598513
1515724	1527738	1442540												1510745		1484175		1599094
1519815	1489299	1443216												1510834		1484192		1599970
1540454	1545045	1323901												1510917		1484409		1600016
1598942	1539225	1522275												1510925		1484432		1600216
1363054	1557935	1521962												1511046		1484566		1600489
1510547	1439343	1520494												1511317		1484652		1600903
1525142	1521962	1513565												1511344		1484683		1601116
1520062	1464352	1598601												1511474		1484737		1601442
1503830	1473331	1528281												1511628		1484739
1491223	1475342	1503140												1511638		1484816
1530220	1497217	1565792												1511776		1484818
1446638	1512287	1348231												1511895		1484838
1436003	1515090	1522177												1511898		1484970
1525295	1514346	1527921												1512113		1485059
1530791	1290465	1546961												1512229		1485215
1534004	1452915	1483902												1512287		1485282
1513261	1538148	1599213												1512393		1485344
1480879	1512014	1130616												1512792		1485399
1468886	1460595	1519635												1512915		1485446
1347705	1516443	1510839												1513073		1485471
1459611	1552708	1556645												1513158		1485547
1523042	1520525	1470195												1513253		1485583
1494501	1473464	1466895												1513473		1485652
1520479	1543410	1500601												1513688		1485656
1475924	1519044	1557935												1514282		1485862
1384074	1512229	1498051												1514327		1485863
1467678	1471694	1486323												1514339		1485878
1452288	1584900	1445765												1514346		1486008
1480088	1375416	1350271												1514748		1486181
1501689	1451573	1509866												1514758		1486335
1509288	1470743	1395526												1514784		1486451
1456584	1027173	1519829												1514864		1486541
1529864	1489541	1335983												1515076		1486552
1474781	1539684	1503213												1515248		1486650
1534463	1370793	1504248												1515344		1486677
1533414	1528706	1326901												1515605		1486703
1585612	1430444	1523130												1515826		1486915
1377358	1458302	1440527												1516015		1486926
1599721	1519222	1326305												1516224		1486952
1343642	1103058	1378979												1516375		1487100
1482372	1542653	1552698												1516383		1487265
1338466	1511238	1503436												1516451		1487293
1473174	1463877	1496512												1516467		1487335
1468343	1484484	1512714												1516614		1487345
1513652	1496393	1510958												1516720		1487419
1538148	1538212	1366549												1516815		1487422
1513095	1452702	1481877												1516818		1487426
1488944	1519540	1547543												1516838		1487682
1481877	1514282	1534011												1516925		1487776
1552914	1527131	1453879												1517016		1487804
1481969	1460383	1459411												1517105		1487853
1433155	1531888	1539476												1517238		1487973
1456514	1322572	1392393												1517342		1488411
1557369	1535738	1087891												1517356		1488441
1569558	1505672	1525601												1517701		1488461
1341313	1483567	1559481												1517774		1488677
1586808	1457236	1362057												1518127		1488695
1463336	1446740	1480645												1518168		1488761
1468942	1513253	1413544												1518300		1488887
1565926	1549906	1460370												1518313		1488895
1475614	1547199	1499204												1518350		1488995
1550946	1497231	1324687												1518580		1489072
1534393	1556564	1476866												1518826		1489076
1525601	1544817	1547727												1519044		1489172
1454737	1557105	1521722												1519225		1489299
1529199	1506100	1492706												1519605		1489314
1481879	1380639	1466808												1519746		1489401
1536877	1483493	1502892												1519847		1489413
1477485	1458754	1446512												1520034		1489441
1504694	1543209	1538140												1520165		1489466
1460595	1549996	1537495												1520466		1489483
1455014	1374570	1551722												1520525		1489601
1482594	1449387	1349554												1520529		1489610
1438486	1540148	1594173												1520670		1489693
1450601	1465130	1344959												1520693		1489712
1542223	1462137	1601209												1520765		1489723
1379840	1488895	1493745												1520813		1489737
1489139	1504248	1442139												1520824		1489813
1455204	1510087	1521440												1520832		1489851
1499162	1585418	1487522												1520884		1489857
1445552	1599055	1555493												1521023		1489878
1514461	1554832	1466826												1521024		1489895
1459297	1526283	1590178												1521196		1490318
1528823	1521260	1566443												1521209		1490368
1492451	1446094	1499565												1521296		1490711
1535810	1359553	1594770												1521315		1490714
1508743	1491090	1561440												1521510		1490728
1368451	1506005	1540059												1521516		1490733
1467142	1479417	1461336												1521533		1490791
1548062	1515605	1446438												1521794		1490863
1495792	1370208	1549940												1522014		1490880
1500888	1381902	1549996												1522136		1490939
1478969	1499204	1544849												1522288		1491175
1520511	1446512	1557283												1522552		1491188
1513889	1503140	1523127												1522620		1491206
1374157	1488557	1525494												1522749		1491223
1517029	1473174	1080791												1522761		1491420
1537987	1500594	1466549												1522893		1491466
1370182	1541561	1549791												1523031		1491480
1540848	1473789	1450601												1523168		1491597
1457096	1503235	1539914												1523172		1491599
1377855	1583426	1488334												1523372		1491617
1584118	1496706	1479044												1523388		1491636
1520014	1561737	1491730												1523405		1491692
1348452	1508412	1147435												1523480		1491717
1354038	1518111	1470833												1523607		1491730
1499522	1555490	1559860												1523678		1491790
1590915	1445333	1452857												1523693		1492027
1432579	1495824	1508241												1523846		1492174
1600367	1590953	1365504												1524253		1492187
1453482	1388805	1460753												1524744		1492209
1517144	1512179	1476805												1524773		1492222
1509699	1499290	1567159												1525200		1492288
1491175	1538734	1455846												1525273		1492313
1502597	1491188	1159212												1525316		1492344
1486638	1469542	1511052												1525430		1492436
1381695	1545472	1540993												1525790		1492451
1542610	1588339	1547552												1525833		1492570
1343040	1454575	1601118												1525855		1492609
1499870	1357575	1517465												1526118		1492716
1326522	1498904	1590397												1526154		1492742
1517174	1531600	1493143												1526165		1492890
1370208	1479544	1500888												1526325		1492904
1509494	1500804	1453479												1526423		1493197
1444037	1511046	1358529												1526452		1493298
1594502	1374170	1508412												1526557		1493407
1501953	1377429	1513372												1526573		1493566
1483176	1489118	1563853												1526741		1493645
1329483	1557234	1510801												1526800		1493670
1506787	1349830	1589859												1526853		1493673
1384066	1549737	1408048												1527064		1493690
1162314	1045599	1545756												1527232		1493695
1455761	1512113	1515830												1527613		1493756
1463802	1501354	1491599												1527624		1493762
1561862	1483069	1549936												1527653		1493858
1456955	1504362	1541728												1527813		1493910
1518994	1548906	1565747												1528110		1493974
1452978	1505100	1544618												1528205		1494030
1539565	1350271	1525065												1528481		1494058
1491206	1463117	1347705												1528484		1494146
1514297	1467754	1511573												1529057		1494209
1342711	1347452	1453734												1529062		1494247
1554798	1526248	1527577												1529077		1494253
1487273	1532879	1537727												1529528		1494320
1464200	1507673	1566726												1529878		1494321
1336014	1327596	1378276												1530273		1494336
1475623	1501036	1550301												1530351		1494364
1495150	1465714	1453482												1530358		1494501
1432037	1562197	1568382												1530379		1494621
1553370	1544877	1568192												1531186		1494709
1548496	1535848	1502272												1531204		1494781
1562197	1507090	1388546												1531244		1494808
1545304	1388477	1354411												1531438		1494814
1533226	1451962	1479280												1531613		1494830
1461336	1519086	1462183												1531697		1494833
1476756	1492904	1534351												1531714		1494920
1541162	1548463	1580981												1531829		1494988
1530364	1477875	1321045												1531968		1495028
1543401	1058589	1601362												1532027		1495103
1520475	1520832	1498959												1532428		1495110
1499189	1503237	1566886												1532607		1495150
1509580	1591057	1463790												1532775		1495176
1064468	1525312	1527171												1532900		1495271
1545472	1499874	1521869												1532976		1495297
1585888	1535140	1586050												1533201		1495477
1448965	1497653	1446763												1533317		1495494
1339657	1530576	1471474												1534150		1495508
1498959	1541728	1490625												1534220		1495543
1444467	1492222	1553903												1534247		1495836
1453570	1452065	1568132												1535589		1495845
1536851	1540953	1490560												1535616		1495853
1471537	1521510	1551807												1535754		1496003
1467507	1460368	1359553												1535854		1496199
1546961	1520573	1473555												1536017		1496215
1493495	1537869	1507313												1536098		1496222
1554937	1539789	1536541												1536230		1496226
1480064	1452857	1461935												1536235		1496228
1539476	1594803	1499290												1536239		1496248
1484195	1531798	1477768												1536432		1496327
1526841	1484339	1485631												1536670		1496393
1165760	1088334	1461561												1536904		1496417
1502606	1553980	1391134												1537003		1496428
1506726	1597305	1527743												1537217		1496502
1545524	1498493	1528186												1537654		1496505
1493645	1524721	1470801												1537668		1496522
1545099	1516383	1467740												1537800		1496694
1597839	1486638	1493931												1537869		1496706
1525312	1556781	1073034												1537932		1496716
1363500	1520765	1548068												1538075		1496792
1440527	1539476	1599530												1538091		1496838
1468258	1553301	1496502												1538442		1496877
1486926	1498051	1565273												1538665		1496894
1523283	1392095	1391966												1538795		1496896
1556499	1535181	1468830												1538817		1496926
1506435	1520146	1496962												1539004		1496962
1542591	1517631	1456931												1539293		1496991
1485445	1564392	1497581												1539491		1497021
1322880	1517232	1361179												1539543		1497041
1519222	1453284	1509494												1539812		1497042
1473880	1491760	1599116												1539826		1497047
1476866	1105385	1453222												1540000		1497176
1540822	1364035	1492288												1540106		1497243
1601272	1515093	1449310												1540148		1497290
1357544	1483066	1464505												1540278		1497304
1525016	1509480	1352787												1540408		1497317
1321481	1537405	1379509												1540612		1497344
1460368	1454558	1558884												1540842		1497352
1513485	1566443	1548463												1540953		1497372
1496003	1526022	1493740												1540966		1497476
1468050	1595174	1458634												1541022		1497566
1565273	1487255	1468924												1541145		1497643
1526022	1496417	1489601												1541253		1497653
1559980	1442365	1597839												1541311		1497731
1496792	1462991	1375416												1541429		1497897
1411855	1484232	1570876												1541664		1497996
1557935	1491420	1533872												1541840		1498051
1508241	1351755	1503237												1541914		1498052
1522660	1486335	1567453												1541963		1498214
1524574	1523940	1477027												1542231		1498225
1490373	1567453	1453250												1542357		1498356
1536541	1460392	1338355												1542402		1498381
1550317	1507622	1535877												1542506		1498426
1456858	1494462	1553950												1542521		1498434
1476484	1495281	1555852												1542523		1498476
1533794	1449754	1442645												1542596		1498571
1491692	1542357	1365588												1542618		1498659
1474755	1585612	1552264												1542648		1498713
1466826	1448475	1542756												1542754		1498841
1489878	1597086	1520518												1542774		1498873
1459429	1478509	1493821												1542977		1498893
1541460	1544870	1532369												1543132		1498904
1549906	1446829	1172080												1543209		1498940
1463006	1355173	1468936												1543725		1498959
1598571	1492996	1386627												1544051		1498967
1463117	1457987	1506787												1544092		1499042
1496838	1553861	1433155												1544096		1499148
1387748	1533407	1503820												1544229		1499159
1561927	1478082	1387432												1544802		1499204
1520042	1599116	1554438												1544811		1499260
1601333	1565273	1556694												1544817		1499263
1507692	1026019	1566282												1545045		1499283
1543410	1481933	1137506												1545062		1499290
1547219	1381205	1486068												1545462		1499404
1377489	1555440	1535140												1545480		1499522
1469958	1487682	1411855												1545582		1499551
1585857	1359239	1477264												1545645		1499570
1539789	1556645	1583950												1545777		1499760
1498356	1491599	1376164												1545916		1499874
1478245	1481679	1511305												1546191		1499881
1473647	1161672	1593559												1546323		1500009
1500009	1474781	1480879												1546327		1500038
1533016	1509288	1579075												1546553		1500095
1489483	1472651	1536351												1546953		1500193
1472219	1442139	1381205												1547187		1500614
1517473	1462131	1597455												1547271		1500658
1550250	1479670	1509917												1547437		1500684
1548523	1596776	1491790												1547821		1500804
1354411	1529853	1456858												1547882		1500825
1545195	1523561	1457096												1547989		1500876
1551425	1497476	1600016												1548034		1501111
1546064	1489139	1576427												1548161		1501269
1461798	1326522	1481195												1548310		1501350
1470178	1466597	1526830												1548404		1501354
1531865	1507946	1529426												1548536		1501533
1392577	1523168	1501269												1548540		1501606
1532779	1541311	1550389												1548640		1501734
1469542	1524153	1374041												1548675		1501795
1392095	1512080	1339657												1548726		1501814
1599801	1590397	1598571												1548735		1501822
1349300	1549279	1320004												1548844		1501922
1510087	1482142	1474962												1548906		1501953
1464505	1521315	1456699												1548977		1501959
1528826	1468445	1585553												1548982		1501966
1342374	1515258	1535848												1549092		1502077
1552573	1549930	1559204												1549270		1502080
1385353	1554828	1546913												1549279		1502239
1369414	1470801	1451046												1549319		1502240
1533977	1324687	1347837												1549377		1502470
1512028	1551809	1508829												1549930		1502487
1028062	1549803	1461290												1550293		1502493
1503213	1541314	1512497												1550370		1502495
1493690	1535490	1465980												1550624		1502506
1546937	1523146	1456375												1550754		1502507
1544868	1461052	1467556												1551066		1502557
1499410	1523372	1457381												1551283		1502576
1534353	1347837	1447455												1551512		1502584
1538335	1510801	1597902												1551531		1502597
1473464	1533378	1355173												1551600		1502638
1510097	1514323	1543830												1551771		1502735
1459411	1594222	1584571												1551947		1502884
1170661	1528925	1525655												1552096		1502892
1508412	1568122	1454125												1552115		1503002
1442540	1498356	1598220												1552269		1503096
1587039	1543073	1524625												1552434		1503140
1510092	1506562	1582667												1552537		1503223
1566443	1551771	1445917												1552580		1503237
1453879	1495588	1476312												1553220		1503257
1584109	1479218	1543223												1553301		1503313
1544839	1524442	1487293												1553411		1503560
1498940	1478938	1482101												1553434		1503601
1474735	1526639	1442365												1553541		1503627
1545059	1099113	1522447												1554061		1503636
1598601	1355261	1535490												1554693		1503668
1470743	1517051	1465344												1555142		1503808
1498047	1345490	1324007												1555146		1503820
1509420	1531865	1498945												1555226		1503848
1351755	1087735	1376440												1555371		1503858
1470378	1497996	1481172												1555378		1504044
1348032	1455904	1541460												1555440		1504151
1377153	1542610	1508083												1555503		1504248
1531069	1467865	1526841												1555538		1504297
1468936	1512810	1455898												1555557		1504306
1488348	1552589	1461302												1555570		1504326
1583950	1365349	1462061												1555734		1504362
1347359	1470195	1455834												1555901		1504365
1467502	1465817	1361103												1556431		1504426
1584864	1355586	1526509												1557002		1504439
1520276	1510684	1542693												1557103		1504649
1587528	1342014	1543073												1557156		1504691
1527731	1582344	1027173												1557168		1504753
1563312	1590000	1523146												1557234		1504756
1497730	1493764	1505395												1557293		1505043
1550311	1596404	1467105												1557665		1505132
1567547	1491117	1509408												1558503		1505395
1542472	1547489	1499666												1558683		1505520
1055668	1592381	1321814												1558686		1505569
1463790	1499830	1580771												1559080		1505679
1579918	1468915	1464650												1559127		1505728
1493197	1413544	1600413												1559317		1505838
1501861	1589490	1460907												1559461		1505943
1460621	1456501	1382775												1559527		1506005
1582767	1448348	1520511												1559754		1506031
1453711	1507441	1500614												1559951		1506036
1528353	1546177	1468017												1560177		1506074
1388182	1467740	1492468												1560451		1506133
1521869	1466470	1545059												1561253		1506137
1538436	1510060	1520376												1561279		1506142
1448279	1544229	1487738												1561330		1506159
1490625	1593559	1453906												1561409		1506211
1544319	1489601	1485656												1561442		1506435
1531023	1524040	1443387												1561494		1506475
1442573	1480879	1535893												1561619		1506480
1513565	1486067	1517029												1562255		1506566
1373768	1338355	1352156												1562277		1506587
1586659	1436541	1396020												1562467		1506605
1546177	1469926	1527030												1562469		1506641
1457381	1360710	1519092												1562549		1506737
1410908	1356192	1448712												1562600		1506753
1386443	1486260	1540674												1562924		1506787
1507673	1593470	1489836												1563161		1506812
1464941	1453011	1549775												1563211		1506886
1524651	1551083	1466597												1563230		1506907
1514737	1521024	1552531												1563382		1507061
1500721	1510394	1491692												1563396		1507078
1580342	1534495	1457627												1563716		1507127
1536516	1486926	1524651												1563904		1507145
1532156	1472485	1530576												1563996		1507157
1487934	1388126	1471653												1564111		1507170
1483787	1524636	1511477												1564306		1507244
1448262	1536367	1479670												1564354		1507622
1509553	1492344	1080982												1564424		1507673
1516031	1464522	1561862												1564533		1507692
1502638	1476892	1568087												1564680		1507776
1079374	1459906	1372100												1564778		1507792
1355173	1560238	1455558												1564781		1507851
1464352	1549775	1514501												1565022		1507941
1493740	1532554	1370833												1565065		1508011
1515727	1391658	1469947												1565278		1508020
1494676	1547882	1362793												1565860		1508037
1452026	1510547	1561007												1565898		1508104
1522990	1596279	1382236												1565900		1508241
1446561	1547040	1455821												1566026		1508248
1088334	1584359	1445510												1566228		1508281
1596776	1516020	1326514												1566321		1508401
1394045	1521794	1561927												1566381		1508412
1430337	1064468	1471701												1566922		1508444
1484683	1532895	1333617												1566968		1508449
1006783	1494253	1497653												1567237		1508554
1554544	1601272	1579495												1567658		1508562
1555852	1594642	1543432												1567789		1508743
1525238	1504649	1525756												1567989		1508769
1499881	1367006	1461558												1568134		1508822
1543930	1522140	1380607												1568243		1508834
1476439	1594973	1490377												1568251		1508859
1494762	1547394	1347822												1568349		1509123
1528536	1557630	1560238												1568504		1509200
1472085	1595511	1360710												1568658		1509213
1467740	1519253	1513485												1568882		1509223
1597879	1572436	1587039												1568964		1509260
1487485	1468920	1536516												1569021		1509277
1515001	1504641	1478958												1569030		1509285
1479574	1536721	1085134												1569123		1509286
1475999	1545099	1506970												1569150		1509295
1529426	1485498	1493826												1569195		1509309
1479670	1461511	1524435												1569495		1509360
1506643	1491223	1491617												1569508		1509401
1480797	1552713	1525312												1569662		1509408
1599527	1468947	1532810												1569679		1509426
1477875	1554198	1321818												1569774		1509442
1498221	1517473	1469315												1569885		1509553
1372100	1365808	1559320												1569913		1509580
1566282	1536429	1476395												1570125		1509587
1483497	1541963	1438486												1570238		1509616
1557630	1473650	1538086												1570409		1509721
1501856	1452978	1479417												1570456		1509827
1492764	1489486	1512664												1570631		1509866
1501024	1382775	1448965												1570864		1509896
1489076	1515096	1479787												1571215		1510003
1477368	1597879	1485344												1571274		1510008
1080791	1594670	1351855												1571592		1510024
1474962	1592222	1501715												1571601		1510054
1488334	1462442	1349920												1571759		1510060
1470026	1484351	1539684												1571830		1510080
1359571	1509420	1363579												1571852		1510285
1095389	1468929	1355208												1572278		1510371
1483184	1486552	1524721												1572281		1510394
1053856	1389761	1549906												1572402		1510406
1479417	1569535	1460458												1572414		1510547
1489441	1497243	1335674												1572436		1510579
1540187	1552531	1579262												1572482		1510662
1577111	1384491	1561808												1572602		1510693
1599171	1326364	1369212												1572843		1510732
1373733	1466826	1379354												1573006		1510755
1496716	1493762	1534344												1573040		1510886
1597111	1460370	1371135												1573151		1510902
1433763	1459227	1519939												1573198		1510958
1461290	1504694	1532776												1573297		1510975
1326364	1487485	1491420												1573406		1510978
1481353	1395134	1520042												1573597		1511238
1495508	1538436	1523760												1573879		1511243
1496877	1542693	1522140												1573936		1511305
1498373	1486952	1462991												1573939		1511327
1537232	1451822	1600178												1573944		1511339
1476934	1530220	1457505												1574081		1511347
1590000	1547219	1503223												1574310		1511477
1560238	1353459	1307227												1574383		1511524
1539225	1557369	1536851												1574474		1511540
1455762	1489813	1489813												1574510		1511614
1490714	1546553	1502638												1574611		1511775
1561737	1511833	1469863												1574711		1511848
1522998	1357544	1552904												1574845		1511890
1493979	1452924	1530662												1574876		1511905
1522644	1064571	1497153												1574963		1512179
1138061	1465166	1519988												1575061		1512204
1389979	1496560	1520014												1575109		1512391
1452957	1449594	1496393												1575150		1512497
1481470	1454240	1542472												1575209		1512587
1466411	1594502	1496003												1575360		1512668
1538050	1526250	1563925												1575469		1512714
1552459	1527171	1453422												1575591		1512774
1380639	1509896	1573180												1575816		1512912
1492515	1557168	1543219												1576076		1513001
1454956	1372566	1323604												1576104		1513095
1519253	1566282	1451573												1576377		1513298
1561808	1457441	1466272												1576503		1513364
1494359	1378249	1497406												1576602		1513485
1598614	1509366	1504511												1576665		1513498
1536351	1346523	1377489												1576699		1513531
1501795	1454599	1458175												1576877		1513565
1521389	1589198	1507851												1576904		1513577
1502493	1537372	1492609												1576972		1513579
1515657	1527882	1379098												1577141		1513734
1334573	1053856	1542322												1577180		1513802
1453742	1444251	1460103												1577371		1513831
1538895	1582908	1387047												1577482		1513834
1489593	1369212	1519253												1577746		1513864
1504297	1150303	1477565												1577917		1513889
1503112	1479639	1551083												1577954		1513955
1466543	1502908	1442573												1578203		1514118
1557680	1065027	1516468												1578296		1514170
1511238	1531745	1553845												1578668		1514209
1512663	1460277	1507622												1578751		1514229
1534524	1514836	1032959												1578840		1514323
1508104	1538758	1542987												1578977		1514329
1467556	1526037	1535025												1579216		1514465
1349920	1463849	1532205												1579250		1514476
1489401	1474944	1463775												1579277		1514484
1516408	1482688	1505111												1579382		1514737
1492468	1448200	1481205												1579453		1514747
1476892	1533310	1518590												1579461		1514839
1582908	1324589	1446187												1579544		1514924
1537758	1501953	1444251												1579556		1515001
1582667	1538442	1489076												1579623		1515079
1485936	1467102	1375653												1579640		1515096
1592399	1544319	1524645												1579909		1515134
1463347	1535854	1465714												1580221		1515208
1550851	1583971	1509904												1580222		1515220
1512677	1394045	1542653												1580227		1515225
1509426	1468674	1504188												1580282		1515241
1503820	1455513	1499364												1580386		1515454
1505111	1463022	1477986												1580716		1515547
1467115	1518822	1517144												1581017		1515548
1470825	1535708	1542918												1582312		1515657
1508401	1478363	1355503												1582344		1515727
1498225	1479982	1505547												1582447		1515813
1499042	1512393	1510975												1582507		1515838
1561039	1387164	1373733												1582551		1515926
1539312	1483776	1503598												1582568		1515975
1494364	1519988	1533016												1582593		1516010
1557120	1521801	1490342												1582916		1516020
1532879	1498225	1514297												1583071		1516031
1396025	1510958	1483768												1583309		1516079
1596585	1456394	1512014												1583426		1516083
1549996	1486720	1539565												1583501		1516197
1368755	1391966	1483776												1583551		1516201
1541465	1589859	1499283												1583656		1516317
1409043	1541735	1469926												1583735		1516339
1516704	1513889	1553719												1583890		1516366
1452006	1440666	1343642												1584065		1516408
1475916	1555914	1490846												1584609		1516468
1498051	1342374	1520146												1584744		1516482
1496393	1599537	1495306												1584817		1516580
1514391	1325026	1513955												1584924		1516586
1473055	1536351	1474160												1585139		1516911
1556994	1480064	1537987												1585292		1516973
1496228	1496228	1454395												1585777		1517029
1521443	1522655	1487335												1585912		1517042
1551499	1534463	1492716												1585975		1517051
1531798	1492702	1551146												1586172		1517144
1500129	1455761	1532165												1586247		1517218
1503636	1444467	1389876												1586282		1517235
1503237	1515242	1479802												1586285		1517258
1323604	1522024	1541114												1586292		1517295
1464812	1582539	1566395												1586684		1517350
1489118	1482372	1591501												1586688		1517473
1511602	1487426	1474946												1586713		1517486
1531804	1501350	1498221												1586748		1517499
1481539	1545462	1553073												1586775		1517516
1515196	1536710	1355971												1587157		1517631
1539711	1488691	1485455												1587224		1518039
1561991	1527921	1476931												1587487		1518142
1458634	1480271	1496428												1587543		1518160
1538775	1516468	1531533												1587640		1518335
1488994	1544618	1459350												1587645		1518401
1491420	1332498	1364349												1587720		1518461
1384491	1483768	1598614												1587850		1518536
1549816	1442810	1463385												1588095		1518576
1441637	1462823	1331398												1588114		1518758
1355113	1487776	1459363												1588626		1518816
1477768	1510551	1533794												1588714		1518839
1458302	1509223	1540187												1588836		1518983
1519792	1479802	1510383												1589198		1519048
1385755	1552434	1462617												1589336		1519083
1458748	1525430	1453742												1589490		1519092
1130616	1499258	1484683												1589592		1519133
1494428	1518401	1543070												1589613		1519250
1584900	1130616	1543079												1589642		1519253
1487529	1493197	1394405												1589784		1519360
1496215	1520891	1534064												1589798		1519422
1494420	1485471	1506616												1589921		1519546
1557395	1503067	1456127												1590236		1519577
1378276	1454182	1444763												1590312		1519586
1472588	1551807	1066869												1590387		1519611
1466776	1498713	1456624												1590432		1519627
1456973	1503431	1519340												1590549		1519635
1561007	1334502	1533226												1590550		1519792
1364659	1022753	1472605												1590748		1519838
1349346	1494247	1594176												1590826		1519910
1592222	1507692	1489770												1590953		1519912
1535893	1525393	1546064												1590999		1519928
1517258	1495271	1495980												1591057		1519939
1376807	1468650	1499874												1591078		1519988
1529143	1481929	1521313												1591179		1520014
1389761	1499881	1538050												1591299		1520136
1527131	1477841	1579918												1591463		1520146
1330732	1525635	1444471												1591779		1520149
1565792	1565860	1381800												1591785		1520255
1487293	1407531	1064571												1592009		1520276
1589649	1485366	1551896												1592193		1520282
1360481	1134595	1407586												1592381		1520332
1529859	1507792	1342711												1592410		1520475
1522030	1433346	1596274												1592493		1520494
1600525	1512714	1495271												1592638		1520573
1481205	1509116	1065027												1592666		1520598
1458814	1591078	1563685												1592685		1520780
1474767	1528484	1552026												1592988		1520864
1496428	1551509	1486552												1592998		1520899
1465093	1513531	1467494												1593084		1521108
1363003	1470806	1521908												1593431		1521190
1558884	1442702	1528739												1593485		1521237
1359553	1552573	1465559												1593550		1521260
1566976	1338814	1493575												1593578		1521309
1500614	1388182	1431483												1593588		1521313
1487429	1472830	1501814												1593642		1521440
1543432	1474755	1463463												1593717		1521801
1537483	1497372	1540839												1593730		1521867
1502870	1477425	1409390												1593794		1521869
1468830	1579216	1586680												1593852		1521876
1035320	1360022	1545472												1594019		1521924
1597924	1543930	1458852												1594063		1521962
1463224	1407587	1499850												1594130		1522002
1538769	1597405	1498610												1594171		1522048
1502080	1376222	1028062												1594582		1522140
1534495	1484683	1455197												1594628		1522160
1525756	1517486	1517051												1594670		1522286
1597086	1598601	1551209												1594720		1522407
1484739	1538912	1470490												1594941		1522411
1549569	1524435	1368260												1595174		1522452
1504295	1369921	1342374												1595181		1522466
1417689	1513298	1493566												1595283		1522550
1530634	1378447	1442352												1595331		1522848
1539724	1551308	1449594												1595400		1522906
1549737	1535810	1481123												1595470		1522972
1510284	1333617	1321481												1595514		1522998
1593559	1513158	1521309												1595679		1523042
1538935	1466785	1513577												1595848		1523061
1532554	1499159	1551422												1595981		1523130
1484351	1442949	1411023												1596010		1523152
1374170	1518310	1519627												1596060		1523183
1534289	1477934	1479358												1596243		1523283
1465636	1043754	1534495												1596279		1523307
1493143	1343642	1471729												1596435		1523399
1466340	1384074	1486181												1596438		1523594
1473650	1551863	1455762												1596511		1523671
1457627	1453995	1483265												1596560		1523760
1566336	1520149	1543329												1596581		1523799
1395134	1516031	1022753												1596696		1523822
1142553	1515454	1539225												1596907		1523903
1455413	1568785	1492451												1596915		1523916
1487419	1522452	1473869												1596964		1524040
1515838	1483176	1481958												1597032		1524147
1538086	1532163	1479218												1597095		1524153
1465100	1540848	1598008												1597150		1524223
1338377	1073034	1556448												1597185		1524425
1552708	1481253	1485059												1597212		1524435
1498488	1521869	1519231												1597303		1524442
1339501	1416332	1526361												1597305		1524471
1537699	1502597	1367826												1597341		1524571
1454125	1350093	1506135												1597489		1524625
1463775	1519627	1526613												1597682		1524636
1524158	1448279	1530347												1597764		1524651
1507078	1490373	1455509												1597771		1524721
1585522	1492209	1594642												1597799		1524729
1446378	1548593	1089537												1598061		1524941
1491730	1478759	1470354												1598065		1525026
1546320	1494230	1164687												1598287		1525238
1526019	1502484	1478245												1598347		1525295
1355971	1503808	1546840												1598584		1525309
1559481	1504044	1506726												1598591		1525312
1504188	1479246	1487422												1598746		1525438
1490377	1543401	1570074												1598777		1525494
1473711	1432513	1520573												1598962		1525601
1521542	1533896	1532156												1599012		1525610
1501215	1548202	1477841												1599055		1525626
1544770	1533414	1489514												1599059		1525635
1526283	1545790	1516201												1599201		1525655
1516468	1545304	1503343												1599241		1525756
1563685	1518576	1459818												1599598		1525911
1365504	1464200	1389512												1599624		1525938
1330758	1476484	1452118												1599666		1526019
1533987	1495297	1334502												1599678		1526062
1575428	1539098	1569535												1599941		1526113
1366549	1456973	1590338												1599978		1526140
1519611	1458306	1466743												1600144		1526167
1580981	1523671	1455513												1600157		1526248
1525626	1477368	1530361												1600237		1526250
1539820	1500009	1385582												1600297		1526283
1460103	1349300	1337077												1600328		1526457
1535416	1520475	1466482												1600498		1526509
1492716	1479574	1487100												1600512		1526608
1370793	1489389	1476808												1600533		1526613
1552664	1493645	1548028												1600630		1526624
1391816	1484737	1392095												1600667		1526693
1542413	1512295	1548202												1600670		1526737
1579035	1477877	1539820												1600718		1526792
1552589	1489514	1507205												1600731		1526830
1522407	1595738	1322880												1600863		1526856
1464498	1484017	1534289												1601144		1526973
1376222	1476808	1517473												1601148		1527021
1529591	1485518	1492904												1601191		1527131
1452112	1502272	1564720												1601212		1527200
1519048	1447547	1544770												1601469		1527312
1502260	1377489	1563619												1601490		1527416
1550320	1509408	1530364												1601498		1527519
1510406	1356095	1445835												1601590		1527589
1468053	1551146	1475614												1601665		1527620
1519092	1394405	1600903												1601669		1527682
1437718	1567237	1479391												1601755		1527731
1521440	1017362	1507441														1527743
1375001	1504297	1467472														1527832
1027173	1550317	1499404														1527940
1494230	1550954	1573108														1528113
1536931	1367601	1597077														1528186
1535140	1492451	1463224														1528191
1374041	1484816	1501689														1528353
1498158	1539719	1545290														1528451
1476377	1564265	1502077														1528472
1542987	1489441	1523283														1528511
1530347	1468258	1408977														1528536
1552904	1458748	1488544														1528541
1464326	1505943	1515454														1528597
1536417	1494988	1500024														1528630
1508246	1524855	1548042														1528637
1494018	1469749	1449776														1528697
1550041	1505393	1466776														1528706
1568382	1504888	1504753														1528712
1495477	1507157	1588237														1528810
1499290	1326514	1556679														1528826
1493695	1467507	1550320														1528841
1457964	1523283	1464326														1528925
1552713	1469614	1351323														1528940
1459906	1528823	1536723														1529084
1462341	1339501	1484652														1529446
1499536	1511628	1499522														1529474
1376440	1445835	1497670														1529552
1466758	1463347	1514145														1529810
1438131	1528541	1497996														1529853
1513498	1491790	1508835														1529873
1159212	1498052	1479580														1530017
1510839	1453132	1438131														1530196
1580646	1475717	1489669														1530345
1376994	1505112	1456120														1530347
1525494	1379509	1595511														1530361
1556564	1453117	1351755														1530364
1599794	1559320	1348106														1530576
1482099	1491175	1491466														1530578
1494814	1489857	1524040														1530634
1551422	1343040	1510579														1530662
1448200	1504365	1597405														1530795
1598220	1525601	1514229														1530803
1480069	1525911	1407661														1530811
1498659	1515727	1498904														1530819
1064571	1162314	1511393														1530888
1471307	1534011	1546754														1530915
1599530	1355596	1429968														1530921
1525655	1479933	1518094														1531069
1509904	1455114	1489483														1531093
1565625	1601194	1476546														1531238
1332298	1522662	1030818														1531261
1507622	1508028	1523928														1531357
1559194	1512792	1513831														1531359
1504753	1555551	1550954														1531533
1575802	1336120	1503830														1531545
1446829	1382431	1356660														1531600
1436138	1538606	1176773														1531745
1392129	1292105	1410737														1531752
1473979	1460204	1503808														1531804
1499874	1349346	1523671														1531865
1500477	1542388	1472588														1531867
1519627	1467549	1550061														1531873
1449310	1494830	1354579														1532036
1506605	1374157	1550513														1532048
1550954	1599794	1552713														1532073
1467472	1479391	1600988														1532156
1559320	1569558	1323213														1532165
1587591	1492609	1498671														1532173
1509866	1468942	1496716														1532248
1385063	1522466	1510406														1532256
1537364	1521125	1471105														1532295
1498214	1459789	1484321														1532355
1463345	1522478	1555914														1532369
1521309	1439947	1597086														1532410
1456375	1453250	1555490														1532554
1555914	1541342	1593957														1532776
1548463	1529534	1550311														1532779
1445917	1461840	1458539														1533016
1517232	1514229	1537372														1533021
1477404	1508743	1601194														1533226
1563426	1362387	1365601														1533237
1505100	1474441	1546744														1533294
1540839	1550320	1105717														1533305
1444251	1482791	1128174														1533310
1479044	1483787	1474872														1533378
1564265	1534353	1536862														1533407
1459775	1526113	1494018														1533414
1520573	1508657	1499536														1533506
1369212	1533732	1583949														1533515
1453250	1499042	1594339														1533555
1601194	1531721	1412833														1533575
1430444	1350558	1074123														1533700
1463208	1496003	1498873														1533714
1479391	1492716	1596585														1533721
1527882	1433487	1551615														1533771
1550528	1495150	1547394														1533872
1519829	1506566	1466470														1533896
1551807	1380607	1349346														1533932
1544659	1517144	1484818														1533943
1413544	1560911	1517558														1533977
1579610	1455197	1593805														1533987
1489857	1378784	1330732														1534011
1516317	1347705	1538601														1534209
1457249	1480592	1509426														1534217
1474160	1509580	1500129														1534344
1479835	1484387	1463806														1534351
1552230	1387380	1501606														1534353
1507851	1466031	1539234														1534357
1453222	1487335	1479602														1534463
1555490	1552564	1505420														1534483
1490375	1476866	1064468														1534495
1090115	1506711	1555067														1534907
1462738	1524147	1492890														1534936
1484321	1442255	1472924														1535026
1137506	1551615	1554205														1535096
1366981	1446378	1529534														1535117
1411149	1515732	1552230														1535140
1479982	1473055	1497276														1535233
1485498	1461561	1509896														1535290
1459227	1497731	1510285														1535490
1489299	1487422	1599794														1535656
1487100	1544802	1158964														1535738
1595391	1539312	1557395														1535783
1498434	1563815	1512677														1535810
1375416	1531069	1506159														1535848
1470085	1332298	1515547														1535871
1350382	1368535	1462423														1535877
1497897	1480169	1469848														1535893
1540366	1463208	1563606														1536093
1452857	1499522	1567280														1536104
1527577	1530361	1370118														1536138
1505922	1463006	1457263														1536150
1599116	1351860	1460383														1536220
1389876	1600367	1484816														1536314
1530017	1498967	1586208														1536351
1534011	1541162	1541465														1536371
1501822	1521023	1378700														1536395
1407718	1352787	1498214														1536429
1554682	1382918	1497897														1536446
1499565	1526068	1533555														1536516
1458631	1463224	1468507														1536721
1517330	1453654	1532779														1536723
1493762	1593475	1525207														1536851
1431483	1355627	1561737														1536916
1498893	1567970	1587528														1537005
1587537	1464312	1411149														1537036
1497731	1488994	1510080														1537372
1524625	1491206	1510933														1537405
1510732	1437161	1554682														1537483
1347822	1494501	1410375														1537486
1396363	1432579	1437161														1537495
1532295	1557265	1533977														1537552
1503598	1515001	1351441														1537602
1446187	1552230	1587537														1537650
1479959	1551976	1594803														1537713
1473869	1600620	1437718														1537721
1466470	1456955	1364659														1537784
1477264	1461935	1504297														1537805
1164687	1468924	1394102														1537817
1460907	1455336	1547402														1537960
1551308	1462957	1535568														1537987
1324007	1459746	1165760														1537999
1431801	1498246	1569399														1538050
1485344	1532779	1586411														1538436
1455904	1481697	1490309														1538601
1518044	1453711	1467033														1538606
1458539	1492253	1466015														1538758
1499656	1442573	1513298														1538775
1534344	1019023	1431891														1538864
1540798	1494814	1341313														1538871
1528186	1476804	1453233														1538881
1537763	1449632	1546254														1538895
1477816	1501795	1530891														1539098
1540193	1544868	1532295														1539118
1506566	1462617	1481539														1539157
1565697	1321481	1582539														1539225
1494703	1506787	1507289														1539476
1457570	1360410	1465353														1539671
1466878	1523934	1601195														1539681
1514229	1497047	1468050														1539711
1552026	1549701	1559194														1539712
1510501	1475623	1538775														1539820
1552531	1463385	1448018														1539904
1392021	1393320	1535871														1540039
1362387	1490261	1542610														1540044
1381800	1565697	1378447														1540059
1533771	1466543	1360056														1540181
1564392	1448712	1452006														1540187
1523760	1510054	1528925														1540193
1557283	1471474	1449775														1540216
1370833	1464812	1528940														1540221
1553845	1520784	1597498														1540325
1597405	1491692	1528188														1540333
1445835	1525438	1518142														1540464
1461199	1545524	1580646														1540632
1480123	1468502	1570019														1540644
1523561	1446561	1599709														1540674
1497243	1467119	1509442														1540798
1495543	1489076	1321691														1540825
1348421	1545481	1041163														1540946
1460370	1455204	1531261														1541014
1517558	1445765	1585851														1541162
1551561	1479959	1482142														1541263
1045599	1474953	1538166														1541314
1543420	1493495	1543413														1541460
1395371	1538881	1552403														1541561
1476051	1549936	1385063														1541605
1543817	1481879	1495477														1541728
1515665	1381695	1055668														1541792
1452128	1489401	1533310														1541805
1517149	1521309	1586808														1541961
1459498	1446440	1536429														1542388
1456528	1350265	1521801														1542472
1542918	1138061	1533378														1542610
1522738	1556653	1362387														1542842
1492904	1540044	1504649														1542918
1456120	1470378	1600620														1542924
1445765	1392552	1468031														1542987
1435483	1597111	1485583														1543176
1522029	1452967	1395201														1543223
1512985	1391816	1547036														1543283
1542388	1480894	1177319														1543329
1551083	1525756	1516317														1543378
1498873	1459411	1541314														1543406
1470801	1525626	1345490														1543410
1326514	1527875	1534483														1543413
1479580	1547543	1384651														1543420
1532895	1517235	1564265														1543432
1468674	1480919	1484432														1543456
1394518	1556997	1447547														1543649
1586848	1573939	1473055														1543830
1509277	1550250	1506036														1543930
1080982	1484432	1442702														1544003
1529531	1513831	1325814														1544031
1466371	1515813	1501822														1544072
1533727	1531906	1531250														1544319
1569399	1516201	1458022														1544353
1448348	1548301	1043754														1544364
1348231	1496716	1432037														1544618
1530582	1554714	1435961														1544631
1503223	1542413	1517486														1544675
1550061	1373768	1535679														1544678
1547893	1383462	1457570														1544695
1485059	1600525	1382031														1544770
1383462	1489483	1559584														1544807
1494966	1364659	1432107														1544868
1540044	1152264	1468502														1544870
1592603	1368755	1449632														1545013
1491589	1329483	1513498														1545026
1546254	1460397	1363943														1545030
1479994	1316505	1547769														1545059
1503098	1499870	1531793														1545099
1600413	1592466	1529853														1545262
1367633	1484566	1462341														1545304
1461561	1033121	1563415														1545342
1519083	1569399	1524153														1545472
1515096	1494268	1344666														1545481
1495271	1459025	1068905														1545731
1439947	1456120	1520149														1545756
1539904	1355321	1554828														1545790
1483768	1347359	1519083														1545922
1491466	1379840	1458814														1545960
1521801	1509277	1550528														1546030
1537486	1490708	1487419														1546050
1513577	1592399	1530888														1546179
1487478	1456528	1366939														1546254
1484432	1537495	1414504														1546320
1474872	1556448	1462919														1546338
1535568	1517356	1592603														1546438
1560911	1407586	1469013														1546453
1479521	1456622	1575428														1546649
1496502	1479994	1457441														1546754
1530576	1478782	1511775														1546790
1513029	1513565	1519048														1546810
1290465	1541565	1489857														1546840
1445145	1469013	1549816														1546913
1590397	1561039	1489401														1547023
1515208	1484409	1407718														1547052
1522140	1352594	1494364														1547071
1547169	1559194	1355627														1547169
1518401	1499189	1464200														1547569
1553073	1509426	1370463														1547727
1546649	1517350	1537483														1547769
1448331	1521783	1472085														1547842
1479358	1573108	1515715														1547878
1519635	1543079	1462738														1548042
1551349	1484652	1496228														1548062
1500024	1455509	1435521														1548165
1467033	1502892	1594967														1548293
1556448	1390719	1481061														1548348
1501269	1387181	1498434														1548371
1552520	1339755	1352594														1548463
1462957	1522556	1565697														1548471
1482139	1462183	1563177														1548494
1499207	1549732	1407619														1548593
1498904	1458539	1439947														1548700
1456589	1533977	1446561														1548721
1389448	1457570	1534209														1548828
1363706	1535117	1387380														1548854
1362793	1523183	1544659														1549130
1524153	1510406	1531745														1549264
1519939	1538601	1570897														1549372
1385506	1372056	1562843														1549417
1388477	1492288	1561991														1549423
1361519	1501814	1547569														1549499
1012669	1444037	1410392														1549544
1544182	1551038	1479982														1549604
1456627	1435961	1466878														1549709
1507061	1459031	1537405														1549737
1471474	1501024	1597832														1549803
1467494	1467478	1552520														1549906
1484652	1474249	1494247														1549936
1369325	1502495	1375047														1549996
1447547	1468507	1507792														1550061
1370463	1487478	1467115														1550242
1520146	1344596	1334573														1550250
1455197	1495477	1497372														1550317
1522848	1536723	1482139														1550320
1529855	1486980	1498425														1550427
1452214	1129112	1384535														1550499
1468027	1508104	1528706														1550513
1535679	1458054	1487426														1550528
1468507	1470957	1486926														1550825
1480556	1543830	1392129														1550913
1369295	1548042	1350265														1550954
1532355	1496432	1548523														1551038
1462919	1519546	1443568														1551079
1487422	1532147	1326694														1551083
1477391	1512307	1465255														1551308
1488695	1457381	1385506														1551349
1594339	1529591	1411841														1551388
1480208	1599527	1442683														1551422
1528706	1369414	1446740														1551499
1507090	1481061	1473464														1551509
1502892	1449740	1476298														1551561
1331398	1459611	1457928														1551615
1588874	1519928	1550242														1551690
1526069	1469317	1435483														1551716
1560462	1525016	1547169														1551807
1475943	1377833	1533727														1551809
1544618	1525238	1457249														1551879
1547769	1431000	1435987														1551958
1508835	1473476	1539587														1551976
1547569	1520276	1446729														1552005
1380607	1520014	1468087														1552014
1517051	1375001	1494814														1552026
1573108	1533801	1512663														1552230
1483776	1585851	1549569														1552255
1432107	1466743	1523183														1552283
1597498	1432107	1451557														1552317
1497996	1467472	1468947														1552372
1568785	1533016	1501640														1552403
1470195	1369295	1512587														1552459
1041163	1597924	1582496														1552520
[truncated: 3,423 more rows]

## Sheet: Genes Expressed in Mycelium
YvsPM	YvsMM	RTvsPM										484 elements included exclusively in "List 1":	535 common elements in "List 1" and "List 2":	1126 elements included exclusively in "List 2":	314 common elements in "List 2" and "List 3":	1091 common elements in "List 1", "List 2" and "List 3":	531 common elements in "List 1" and "List 3":	539 elements included exclusively in "List 3":
1447330	1448224	1586879										1000253	1015056	1001405	1016793	1000305	1032352	1005889
1591260	1468199	1591216										1008270	1024558	1003500	1031666	1018691	1079591	1036641
1586609	1369475	1460757										1023720	1029479	1006973	1048581	1029637	1137336	1063740
1520598	1472783	1595237										1046273	1030640	1007498	1065281	1031119	1152014	1086198
1548494	1322359	1552029										1055566	1059115	1008001	1079491	1041319	1172053	1108023
1590358	1443186	1465376										1090090	1059254	1009515	1105922	1054703	1301999	1155573
1474507	1593794	1487804										1090429	1061866	1010138	1107476	1058846	1320893	1165324
1533237	1454192	1521545										1096060	1106431	1014017	1115782	1068210	1321135	1166306
1395857	1441627	1457376										1097240	1110517	1014724	1144010	1082848	1325533	1174567
1498841	1333389	1465656										1110088	1110744	1019783	1156571	1116047	1328601	1293609
1458113	1373664	1418051										1113608	1120711	1022486	1164248	1140241	1332728	1322923
1515926	1515926	1549130										1119585	1140161	1022826	1297275	1156345	1341498	1323387
1502884	1502884	1381482										1124858	1141391	1025592	1305257	1161729	1341530	1323750
1442309	1448367	1533506										1126324	1144134	1026010	1306666	1163071	1342072	1332793
1476754	1488884	1523474										1141588	1148843	1028052	1321719	1167480	1344170	1335150
1516366	1519605	1533515										1150217	1152884	1028090	1325012	1176600	1345849	1344598
1516586	1476307	1475875										1169234	1159667	1032205	1328040	1291525	1346179	1347007
1500193	1457562	1463003										1297765	1169398	1034771	1328137	1319340	1346320	1347018
1531093	1523296	1348566										1297844	1318131	1035056	1333389	1319384	1347260	1347831
1477825	1451796	1546573										1324426	1319860	1035330	1334309	1321417	1347454	1347930
1475433	1526739	1374232										1324484	1319968	1038382	1342161	1321731	1348102	1348115
1546453	1476268	1355184										1324592	1320314	1042034	1343115	1322491	1348301	1350069
1369983	1024558	1342072										1325087	1320654	1042035	1343272	1324013	1349062	1350960
1353013	1383596	1530795										1325435	1322359	1042271	1346345	1326529	1349249	1351053
1593246	1587351	1528790										1326411	1323195	1045444	1347388	1327071	1349376	1351314
1580414	1552830	1347388										1333967	1325974	1049721	1348566	1330980	1350752	1351437
1537602	1484981	1370017										1336324	1326131	1054460	1349107	1333678	1351079	1352597
1374151	1502576	1546790										1340641	1327164	1056202	1350320	1333955	1351177	1352741
1446176	1586244	1595680										1340681	1327299	1059940	1352160	1334600	1351799	1353135
1587351	1394464	1364405										1344607	1330912	1062176	1352308	1334980	1351863	1353562
1509200	1593485	1514465										1347570	1336474	1062574	1352604	1334985	1352145	1353851
1528810	1393315	1527312										1347922	1341565	1066979	1355516	1335829	1352752	1355436
1468263	1514327	1396139										1350385	1344997	1068969	1357493	1335846	1353146	1355789
1381482	1593588	1508769										1351582	1345409	1071190	1358765	1336367	1353499	1356076
1366700	1386343	1520136										1352963	1346268	1072150	1360385	1336444	1354001	1356832
1586987	1539681	1321417										1353576	1346466	1072233	1364222	1337482	1354025	1356982
1514465	1115782	1521655										1354233	1346779	1074021	1364399	1339505	1354885	1357931
1451834	1349755	1500684										1355025	1347010	1079767	1367889	1339519	1354895	1358887
1532410	1477579	1553990										1355782	1351494	1083516	1369475	1340256	1354963	1361034
1539681	1586987	1476915										1355822	1351971	1091041	1370469	1341725	1355369	1361249
1433212	1473364	1500340										1356070	1352372	1092864	1370916	1346223	1355982	1361949
1465138	1585139	1446176										1357394	1353007	1096820	1370995	1346383	1356478	1362797
1545013	1497478	1476707										1358715	1353121	1100962	1371392	1346716	1356510	1362981
1463175	1446565	1463020										1359189	1353195	1102636	1372420	1346969	1356532	1363260
1460646	1416796	1475880										1360607	1354331	1106105	1373260	1347030	1357266	1364405
1595569	1149678	1378134										1360612	1354395	1110797	1373664	1347525	1358498	1364688
1494621	1352308	1455521										1362225	1354679	1119535	1376132	1347700	1358663	1365056
1480110	1465853	1601554										1362497	1354959	1124575	1378545	1347812	1359484	1365718
1031119	1438866	1511327										1362506	1356221	1127229	1378819	1347865	1359783	1366486
1549130	1355828	1370995										1362638	1356314	1128237	1379351	1348871	1359889	1366563
1556858	1137052	1515040										1363300	1357096	1128859	1380646	1348925	1363816	1366693
1484175	1482707	1349367										1363928	1357320	1131776	1381604	1348965	1366133	1367154
1447956	1504155	1461049										1364104	1357753	1132586	1381769	1349083	1367223	1368152
1373145	1468184	1536371										1365006	1359117	1132811	1382140	1349257	1367505	1373553
1530795	1378572	1477165										1365138	1359379	1137024	1382688	1349367	1367862	1374591
1483268	1478401	1365458										1365538	1359587	1137052	1383596	1349946	1368227	1375392
1522906	1362081	1368475										1365618	1359682	1147477	1387399	1350034	1368542	1375481
1391973	1393483	1590358										1366356	1360245	1147952	1390214	1350043	1369872	1376229
1485862	1392237	1473419										1366719	1361204	1147999	1392386	1350091	1371044	1376283
1473419	1516339	1466174										1366857	1361481	1149678	1392990	1350200	1371386	1377588
1349367	1557440	1550163										1367673	1361789	1151236	1393315	1350552	1371914	1378111
1370696	1032205	1515926										1367719	1362288	1161390	1394066	1350651	1371978	1379212
1536446	1590114	1374151										1368492	1363977	1161978	1395884	1350746	1372134	1379220
1528697	1375399	1372594										1369083	1364318	1164253	1396018	1351166	1372168	1379270
1492313	1454892	1493274										1369598	1365018	1171734	1396455	1351740	1372613	1379339
1485878	1574963	1461324										1370615	1365292	1306538	1418025	1351920	1372713	1380478
1502506	1553141	1546453										1370744	1366194	1319647	1418051	1353013	1373480	1381038
1506753	1571830	1593109										1371485	1366687	1319807	1430811	1353183	1374601	1381561
1381032	1337482	1447330										1372654	1367679	1321074	1434564	1353435	1374885	1381759
1521924	1387399	1524740										1372926	1367844	1321356	1438176	1353724	1375698	1382471
1453499	1586609	1592244										1373181	1369377	1321396	1438866	1353746	1375715	1383614
1587034	1457566	1480121										1373983	1370040	1322160	1441129	1354524	1376269	1384257
1479353	1385661	1468170										1374875	1370356	1322266	1445422	1355184	1377522	1384263
1372558	1363977	1601631										1376499	1372550	1322460	1449548	1355237	1377562	1386076
1467110	1499300	1483128										1377288	1374861	1323035	1450618	1355922	1377712	1386490
1324013	1499672	1587034										1377814	1375115	1323517	1451158	1356380	1377806	1386776
1461684	1474926	1483268										1377842	1375399	1323600	1451753	1356753	1377954	1387210
1586879	1378313	1353013										1378062	1375585	1324267	1452738	1357279	1378841	1390225
1514924	1575360	1476147										1379047	1375812	1324337	1455120	1357504	1378995	1390373
1466398	1469869	1557627										1380085	1376699	1324359	1455501	1358140	1379184	1391159
1414357	1455232	1587213										1380992	1377605	1324476	1455521	1358145	1379248	1391253
1511905	1376132	1485652										1381061	1378081	1324971	1456489	1358824	1379739	1391276
1590114	1378177	1500193										1382285	1378127	1326827	1457077	1358871	1379809	1392826
1365458	1480198	1484175										1382672	1379179	1327707	1457138	1359075	1379918	1393913
1501734	1348566	1584834										1383729	1379970	1327779	1457903	1359316	1380357	1394114
1591216	1393405	1455299										1383759	1383244	1327832	1458618	1359344	1381016	1394330
1597002	1598061	1583595										1384157	1383286	1328193	1460128	1360061	1381090	1394386
1463020	1106431	1451144										1385030	1383835	1328400	1460200	1360264	1381438	1395723
1360264	1589592	1466382										1386197	1384457	1328481	1460659	1360381	1382732	1396264
1479095	1540000	1395857										1387547	1386241	1329057	1461193	1360452	1383483	1396438
1378526	1380646	1486358										1388255	1386453	1330851	1461236	1361258	1384248	1431341
1333955	1457564	1510886										1389354	1388684	1330948	1461456	1362444	1384539	1435721
1500684	1494326	1519911										1391099	1388883	1331636	1461625	1362520	1384775	1436161
1394253	1387063	1485862										1391810	1388972	1331991	1462573	1363019	1384994	1437129
1546790	1501734	1369466										1392772	1389313	1332087	1462630	1363237	1385035	1437432
1024558	1590387	1548471										1392814	1389618	1332337	1463003	1363262	1385076	1438865
1490939	1483422	1598510										1393442	1390517	1332752	1463177	1363415	1385235	1442768
1513802	1529878	1373480										1396163	1390582	1333806	1464336	1364265	1385460	1442916
1493662	1509398	1586347										1396194	1394110	1334481	1464393	1364327	1385627	1445276
1523594	1362943	1543406										1411741	1394233	1334891	1464935	1364563	1386412	1446172
1535656	1079491	1497955										1412674	1395234	1335238	1465233	1364923	1386661	1446491
1455497	1587645	1468748										1416742	1395561	1335409	1465337	1365111	1386746	1446665
1499570	1363436	1434564										1432980	1395629	1335643	1465573	1365180	1388043	1446993
1502576	1498476	1474008										1435320	1409085	1336606	1465853	1365250	1389670	1448073
1532248	1571215	1358824										1437683	1410353	1337251	1466382	1365458	1389865	1448381
1459565	1445386	1482579										1441683	1415883	1337379	1466557	1365502	1390652	1448895
1584681	1542977	1448109										1442589	1416601	1338060	1467353	1366113	1392856	1449220
1477953	1593501	1389679										1443495	1417175	1339121	1468096	1366376	1393965	1449510
1527312	1371143	1514924										1443806	1432453	1339149	1468184	1366700	1394652	1449949
1537960	1341746	1598711										1444228	1433443	1339278	1468199	1366756	1394932	1449979
1595680	1353007	1475433										1444450	1437783	1339933	1468589	1367627	1396454	1451026
1591901	1453499	1474507										1444752	1438416	1340510	1468748	1368110	1396706	1451206
1535741	1391507	1522906										1444928	1442994	1340734	1468964	1368475	1407819	1451543
1516482	1465337	1351920										1446434	1445953	1340809	1469302	1369466	1411485	1451707
1548854	1447330	1334309										1446595	1446346	1341214	1469527	1369521	1411847	1451754
1541823	1391804	1481290										1447950	1446621	1341254	1469656	1369584	1416378	1451817
1471544	1454092	1518461										1448105	1447512	1341746	1471158	1369688	1433212	1452191
1441627	1349448	1475897										1448552	1448086	1342066	1471233	1369983	1442351	1452715
1385889	1512902	1547057										1448763	1448191	1342386	1471531	1370017	1442409	1452985
1516911	1492358	1523822										1449495	1448244	1342995	1471575	1370097	1442676	1453091
1468170	1484838	1473620										1450394	1448407	1343225	1473004	1370696	1442942	1453297
1557627	1590358	1591260										1451110	1448453	1343381	1473983	1370719	1443725	1453713
1589529	1466398	1031119										1451843	1448560	1344090	1474926	1370951	1443749	1453933
1437783	1516403	1539681										1451908	1449027	1344098	1475730	1372126	1443812	1454113
1365292	1600533	1456020										1452110	1450008	1344172	1475866	1372410	1444183	1454137
1601554	1380467	1474578										1452591	1450179	1344199	1475897	1372558	1446075	1454265
1527519	1511317	1378586										1452614	1450323	1345133	1476013	1372563	1446249	1454556
1463710	1579556	1450974										1453357	1450516	1345897	1476642	1372594	1446319	1454622
1479947	1535163	1478934										1454016	1451201	1345902	1477568	1373133	1447255	1454657
1321417	1382242	1512902										1454281	1451592	1345938	1477596	1373145	1447312	1454962
1387697	1468191	1532410										1454618	1452060	1346507	1477945	1373222	1447774	1455023
1106431	1132811	1540039										1454771	1453474	1346571	1478382	1373264	1447828	1455329
1473944	1578203	1538871										1455312	1453495	1346612	1478401	1373392	1448129	1455401
1464670	1577746	1370696										1456718	1453499	1346800	1479113	1373618	1448945	1455664
1529446	1373830	1511347										1457107	1453614	1346962	1479242	1373830	1449048	1456005
1485652	1083516	1376907										1457357	1453722	1347043	1479643	1373922	1450353	1457686
1477165	1509666	1471963										1457743	1453744	1347481	1479794	1374032	1451021	1457797
1516997	1540842	1541943										1458461	1453987	1347686	1480121	1374151	1452803	1458542
1351494	1439925	1516580										1458792	1453998	1348131	1481182	1374232	1453008	1458615
1490880	1566922	1525012										1459280	1454471	1348192	1481383	1374421	1453124	1458626
1497304	1025592	1451656										1459809	1454930	1348346	1481788	1374450	1453374	1458765
1457521	1514784	1584681										1460415	1455193	1348539	1481799	1374824	1453733	1459009
1488677	1509395	1528810										1460663	1455676	1348608	1481806	1375147	1454005	1459013
1457129	1547057	1515041										1461339	1455764	1348778	1482149	1375680	1454122	1459193
1368110	1019783	1468849										1461409	1456497	1348861	1482556	1375711	1454548	1459499
1447092	1497643	1587078										1461968	1456599	1348890	1482707	1376005	1454607	1459510
1353007	1528841	1386462										1462408	1456632	1348900	1483228	1376525	1454803	1459652
1473385	1448245	1468448										1462606	1457029	1349041	1483330	1376789	1455299	1460379
1393736	1552005	1486117										1463130	1457453	1349448	1483431	1376907	1455347	1460454
1535074	1356221	1542417										1463199	1457466	1349700	1483739	1377103	1456947	1460952
1549423	1380523	1353435										1463294	1458157	1349755	1484025	1377156	1457119	1461049
1502584	1346507	1442309										1463394	1460102	1350209	1484981	1377346	1457179	1461449
1346969	1457376	1496222										1463941	1460446	1350842	1485484	1377456	1457334	1461567
1527620	1453998	1542407										1464304	1460641	1351086	1485516	1377941	1457561	1462079
1588502	1383244	1458012										1464774	1461125	1351260	1485973	1378100	1457599	1462983
1456131	1600498	1540750										1465482	1461448	1351398	1486117	1378134	1458170	1463013
1378177	1518335	1594914										1465679	1461672	1351540	1486358	1378177	1458460	1463096
1484004	1359117	1343272										1465708	1463407	1351757	1486525	1378526	1458934	1463999
1367627	1365835	1505132										1465731	1463501	1352516	1486827	1378572	1459140	1464285
1467427	1493017	1534357										1465870	1463599	1352670	1488869	1378586	1459153	1464418
1556656	1569508	1514476										1466053	1463888	1353063	1489916	1378752	1459783	1464660
1445953	1319968	1350034										1466356	1463991	1353287	1490098	1378888	1459902	1464797
1494808	1497398	1510693										1466530	1464661	1354087	1491679	1380177	1460003	1464828
1500568	1545013	1485878										1466945	1465331	1354929	1492355	1381032	1460142	1465035
1473620	1444712	1601487										1467026	1465869	1355022	1492984	1381482	1460235	1465208
1451144	1548540	1460646										1467132	1465948	1355139	1493274	1381524	1460431	1465308
1375812	1373145	1499570										1467304	1466422	1355227	1493377	1381758	1460464	1465317
1489895	1361204	1463710										1467558	1466604	1355265	1493849	1381926	1460890	1465320
1362444	1357320	1363019										1467759	1467007	1355326	1494326	1382080	1460957	1465384
1335829	1544092	1376525										1468356	1467110	1355828	1495303	1382617	1461057	1466008
1519838	1487666	1495028										1468406	1467688	1356084	1495435	1383246	1461633	1466056
1514484	1384657	1460297										1468417	1467693	1357419	1495537	1383313	1461671	1466586
1540039	1553990	1390474										1468637	1467875	1357487	1496258	1383724	1461850	1466834
1599215	1414357	1471531										1468705	1468220	1357832	1496317	1384361	1462138	1467316
1511327	1353013	1498841										1469197	1468290	1357858	1498157	1384767	1462238	1467345
1586347	1593471	1449029										1469221	1468346	1359020	1498481	1385014	1463314	1467378
1549709	1409830	1489314										1469227	1468749	1359486	1499296	1385889	1463491	1467419
1347030	1500712	1357493										1469809	1468879	1359712	1500340	1386462	1463493	1468423
1448244	1584924	1527940										1469935	1468968	1359901	1500553	1386575	1463601	1468730
1392716	1546527	1599552										1470431	1468972	1359997	1500865	1386918	1463871	1469070
1396139	1465138	1482707										1471210	1469826	1360018	1501457	1387328	1465218	1469931
1451329	1324359	1382617										1471849	1469869	1360320	1503693	1387697	1465240	1470251
1529552	1466081	1569260										1471890	1470338	1360356	1508382	1387974	1465371	1470277
1484069	1538080	1506753										1472194	1470515	1360444	1508749	1388116	1465397	1471012
1528630	1586684	1433212										1472681	1470959	1360445	1509106	1389541	1465721	1471082
1524594	1339121	1545262										1472690	1471074	1360559	1509382	1389679	1466518	1471086
1545731	1459189	1453071										1473523	1471373	1360939	1509623	1390055	1467188	1471320
1467506	1054460	1451517										1473564	1471814	1361146	1510155	1390474	1467380	1471543
1453634	1473385	1369688										1473635	1472410	1361183	1511596	1390768	1467960	1471717
1517042	1463924	1502239										1473727	1472724	1361253	1512068	1390831	1468849	1471963
1549723	1473065	1333955										1474509	1473219	1361543	1512207	1391043	1468873	1472615
1469869	1385881	1562935										1475249	1473376	1361616	1512846	1391229	1469072	1473020
1416601	1442722	1471342										1475834	1473898	1361940	1512902	1391247	1469160	1473244
1465504	1594582	1463175										1476093	1473944	1362081	1513440	1391285	1470027	1473371
1375399	1461684	1507244										1476269	1473992	1362083	1513646	1391804	1470386	1474016
1518536	1463888	1433625										1476540	1474215	1362921	1513820	1391899	1470767	1474418
1521867	1550370	1525938										1476868	1474666	1362943	1514380	1391973	1471900	1475750
1383286	1348871	1520598										1476912	1474672	1363289	1515040	1392067	1471964	1476436
1476430	1332752	1526608										1477373	1474686	1363436	1515041	1392327	1472060	1476967
1493974	1105922	1502506										1478332	1474860	1364809	1515118	1392716	1472659	1477039
1457376	1490465	1366700										1478896	1475150	1364873	1515552	1392991	1472920	1477142
1493858	1584609	1470240										1479193	1475255	1365027	1515851	1393292	1472998	1477233
1382617	1391899	1518039										1479527	1475458	1365109	1515977	1393736	1473028	1477295
1468741	1506074	1465892										1479548	1475563	1365382	1517478	1394117	1473738	1477423
1526737	1476430	1356832										1479780	1475859	1365532	1518363	1394253	1473780	1477828
1494058	1503785	1539712										1480268	1476131	1365802	1518395	1394291	1473810	1478322
1454092	1546573	1461684										1480544	1476307	1365835	1519911	1395063	1473889	1478338
1523822	1355139	1380646										1480700	1476416	1366537	1520259	1395147	1474213	1478508
1363019	1479947	1465397										1480783	1476754	1367058	1520455	1395496	1474264	1478607
1432453	1492697	1552005										1481455	1476831	1367255	1521545	1395610	1474406	1478875
1523399	1538134	1460957										1481463	1477345	1368368	1521990	1395733	1474409	1479222
1449798	1539812	1450353										1481514	1477776	1368652	1522251	1395834	1474498	1479426
1453998	1457521	1396611										1482749	1478208	1368883	1523296	1395857	1475239	1479494
1534907	1527021	1509711										1482781	1478342	1369147	1523452	1395861	1475445	1480168
1000253	1333806	1360381										1482868	1478497	1369978	1524740	1396117	1475642	1480254
1505679	1542703	1480340										1483579	1478867	1370343	1525127	1396139	1475956	1480355
1453515	1392316	1465858										1484801	1479353	1370913	1525229	1396611	1476275	1480451
1342072	1481893	1446167										1484826	1479529	1371143	1525472	1410938	1476301	1480494
1460757	1508214	1509912										1486091	1480992	1371527	1526148	1412731	1476547	1480819
1516013	1445047	1532248										1486398	1481419	1371530	1526678	1414357	1476707	1480945
1386575	1357419	1515225										1486686	1481706	1372059	1526739	1414621	1476748	1481016
1502557	1469656	1507170										1486885	1482180	1372401	1527272	1416449	1476915	1481243
1540644	1348131	1517295										1487095	1482184	1372492	1527735	1430967	1476952	1481294
1018691	1511544	1334985										1487239	1482230	1372523	1527911	1431310	1477137	1481333
1565158	1395629	1347525										1487284	1482376	1372529	1528032	1433625	1477151	1481447
1449029	1526154	1527832										1487336	1482916	1372666	1528089	1435031	1477157	1481899
1507244	1498841	1467353										1487538	1483321	1373582	1528161	1436628	1477967	1482125
1562884	1588095	1376789										1487600	1483544	1373746	1528290	1437973	1478086	1482171
1552867	1543245	1353183										1487663	1483794	1373776	1528447	1437982	1478202	1482283
1508037	1473416	1376229										1487793	1483918	1374048	1528692	1438082	1479128	1482920
1516339	1513058	1058846										1488326	1484053	1374460	1529156	1439461	1479178	1483001
1451517	1370017	1488461										1488444	1484524	1374693	1529695	1441627	1479203	1483006
1568050	1483228	1588774										1489280	1484590	1375246	1529849	1442309	1479854	1483071
1516079	1353195	1464015										1489870	1484609	1375469	1530213	1442967	1480333	1483414
1140241	1449029	1479947										1490477	1485083	1375710	1530244	1443910	1480706	1483766
1543406	1389517	1453374										1490871	1485415	1376077	1530260	1444133	1481020	1483861
1498426	1434564	1488677										1491069	1485923	1376086	1531425	1444314	1481053	1484045
1376907	1498717	1484004										1491449	1485987	1376167	1531718	1445692	1481165	1484230
1557359	1383286	1505093										1492227	1486987	1376571	1533253	1446136	1481348	1484833
1446167	1481759	1499263										1492926	1487262	1377042	1533661	1446167	1482455	1484843
1516406	1388883	1441129										1493192	1487296	1377098	1534857	1446176	1483235	1485369
1578119	1447345	1520255										1493569	1487304	1377508	1535297	1446232	1483241	1486502
1517004	1465108	1553141										1493955	1487342	1377870	1536009	1446329	1483665	1486810
1482579	1595812	1504408										1494035	1487656	1378007	1536011	1447092	1484050	1486817
1455850	1464428	1390055										1494052	1488520	1378072	1536224	1447121	1484154	1487364
1487973	1522906	1490880										1494412	1488549	1378313	1537939	1447330	1484820	1487572
1551079	1452228	1358140										1494565	1489430	1378989	1538719	1447366	1484963	1487887
1598202	1395292	1371914										1494617	1489534	1379347	1539882	1447902	1485225	1488688
1498476	1530213	1549604										1494782	1489644	1379602	1540169	1447956	1485486	1488876
1500561	1477825	1362444										1495315	1489672	1379674	1540406	1448051	1485491	1488999
1525774	1464670	1499260										1495975	1490244	1379837	1540425	1448092	1485927	1489134
1552029	1590549	1472378										1496380	1490392	1380211	1540750	1448109	1486386	1489450
1477472	1583656	1541263										1496831	1490508	1380227	1541142	1448143	1486670	1489517
1515225	1549319	1346383										1497211	1490916	1380467	1542139	1448693	1487441	1489745
1378572	1365502	1351166										1497332	1491770	1380523	1542407	1448896	1487590	1489763
1483128	1518816	1372134										1497574	1491777	1380612	1542417	1449029	1487968	1489840
1493407	1394291	1521190										1497641	1492192	1380664	1542607	1449798	1488435	1491293
1471342	1144134	1584148										1497644	1492242	1381006	1542703	1450682	1488663	1491458
1353746	1500658	1164248										1497788	1492358	1381556	1542781	1450694	1488672	1491729
1498571	1565900	1506074										1498345	1492448	1381900	1543918	1450974	1488753	1492230
1378888	1445711	1468263										1498606	1492669	1382021	1545208	1451144	1488980	1492285
1522255	1446501	1518294										1499495	1493422	1382242	1545787	1451329	1489122	1492652
1497176	1378526	1498476										1499658	1493662	1382313	1546084	1451517	1489493	1492673
1336444	1468263	1335846										1500084	1493752	1383457	1546233	1451569	1489501	1493031
1374824	1320654	1451834										1500164	1493772	1383626	1546527	1451656	1489540	1493054
1347525	1478984	1152014										1500854	1494033	1383935	1546573	1451738	1490130	1493149
1453569	1512207	1495537										1501107	1494799	1384036	1546843	1451834	1490323	1493550
1497643	1468741	1369521										1501522	1495413	1384657	1547057	1452029	1491096	1493578
1451656	1485862	1365180										1501740	1495645	1384833	1549724	1452228	1492564	1493697
1396611	1578977	1508822										1502298	1495925	1385661	1550019	1452460	1492989	1493865
1000305	1471831	1545013										1502319	1495999	1385726	1550067	1452939	1493003	1493950
1489072	1557627	1582869										1503008	1496176	1385863	1550163	1453071	1493009	1494123
1335846	1503772	1552014										1503619	1496324	1385881	1550270	1453076	1493019	1494186
1466194	1557658	1488761										1503701	1496361	1385957	1551513	1453248	1493285	1494219
1497344	1500193	1554083										1503805	1496847	1386150	1552035	1453515	1493435	1494451
1529873	1564680	1484843										1504180	1496978	1386239	1552466	1453569	1493946	1494575
1489610	1591901	1455227										1504242	1496982	1386343	1552616	1453576	1493949	1494898
1463924	1469302	1477137										1504386	1497209	1386749	1553228	1453634	1494525	1495154
1389313	1498232	1480015										1504602	1498084	1386854	1553990	1453663	1494637	1495263
1484040	1506194	1474926										1504804	1498542	1386950	1554857	1453776	1495122	1495268
1377346	1367058	1524941										1505401	1499548	1387063	1555308	1453992	1496261	1495438
1460641	1580414	1456043										1505536	1499672	1387290	1555368	1454092	1497033	1495571
1594149	1492602	1472060										1505558	1500561	1387299	1555909	1454143	1497542	1496234
1358871	1529156	1512207										1505577	1500568	1387305	1556604	1454398	1497659	1496369
1392067	1474014	1586244										1505953	1501103	1387352	1557125	1454879	1497952	1496529
1319384	1517701	1502735										1505972	1502016	1387587	1557302	1454892	1497955	1496835
1340681	1548165	1364327										1506014	1502578	1387838	1557440	1455227	1498002	1496889
1474222	1495537	1446329										1506327	1502989	1388014	1557928	1455318	1498689	1497662
1490733	1593638	1516079										1507952	1503128	1388400	1560071	1455497	1498941	1498092
1553049	1541145	1325012										1508167	1503662	1388447	1564765	1455582	1499023	1498154
1507127	1344098	1452738										1508685	1503770	1388510	1566107	1455797	1499341	1498674
1593109	1575150	1526638										1509024	1503785	1388816	1571983	1455850	1499979	1499061
1527832	1495540	1452228										1509538	1504162	1388821	1572928	1455994	1500271	1499225
1323195	1599624	1369983										1509638	1504990	1389450	1578093	1456020	1500312	1499448
1497290	1489672	1480819										1510043	1505107	1389517	1580727	1456043	1500328	1500087
1497542	1476754	1360264										1510162	1505298	1389636	1582976	1456131	1500586	1500298
1479529	1472267	1545026										1510293	1505412	1389831	1583435	1456274	1500625	1500644
1506074	1035330	1524571										1510721	1505529	1389923	1586244	1456379	1500672	1500696
1373830	1381032	1533237										1510816	1506167	1390052	1586387	1456382	1501312	1501447
1448109	1502256	1337482										1511166	1506373	1390197	1586462	1456482	1502021	1501971
1535163	1072233	1373264										1511360	1506464	1390506	1586608	1456510	1502125	1502071
1417175	1589642	1517042										1511378	1506604	1390733	1588146	1456576	1502740	1502284
1485486	1393696	1543918										1511844	1507096	1390810	1591657	1456642	1502874	1502548
1455582	1552616	1378526										1511861	1507471	1391444	1595237	1457033	1502983	1502616
1581301	1382688	1487973										1512098	1507703	1391507	1595581	1457102	1503383	1502628
1557738	1452738	1587789										1512331	1507905	1391565	1595812	1457129	1503961	1502724
1593427	1518395	1509401										1512522	1508505	1391698	1597266	1457293	1504178	1503050
1594914	1455497	1358871										1512806	1509010	1391998	1597347	1457376	1504408	1503136
1577715	1547275	1466398										1513557	1509558	1392018	1598245	1457521	1504786	1503150
1163071	1375246	1476013										1513875	1509730	1392103	1598510	1457528	1505093	1503373
1395610	1361543	1548348										1513881	1509978	1392195	1598711	1457700	1505399	1503459
1546810	1518168	1555889										1514318	1510270	1392237	1598769	1457807	1505703	1503833
1553141	1379351	1465738										1514403	1510534	1392278	1601032	1457816	1505782	1504032
1475875	1554857	1460003										1514503	1510844	1392316	1601487	1457883	1505798	1504072
1347700	1466522	1591901										1514522	1511098	1392593		1458012	1506022	1504596
1541836	1583551	1519794										1515521	1511194	1392687		1458100	1506118	1504975
1486451	1411049	1527911										1515712	1511399	1392894		1458113	1506181	1505143
1448105	1594720	1476918										1516348	1511544	1393096		1458152	1506452	1505267
1496222	1381482	1378572										1516535	1511764	1393405		1458211	1506460	1505643
1463888	1410471	1347018										1516830	1511829	1393483		1458586	1506660	1505826
1346383	1347481	1458152										1517067	1511958	1393696		1458607	1506854	1506145
1437982	1599241	1508444										1517075	1512218	1394464		1458917	1506877	1506153
1585180	1370913	1592582										1517215	1512500	1394626		1459002	1507374	1506294
1516010	1597074	1350200										1517688	1512527	1395154		1459039	1507609	1506315
1355822	1513041	1458607										1518232	1513041	1395292		1459184	1507697	1507113
1592244	1359712	1482264										1518302	1513058	1395537		1459294	1508224	1507224
1492358	1466382	1500038										1518552	1513712	1395579		1459378	1508237	1507686
1593638	1341254	1366376										1518748	1513926	1395916		1459389	1508379	1507859
1461869	1331636	1499341										1518794	1513949	1396433		1459565	1508544	1507861
1370951	1372558	1443910										1519581	1513990	1407259		1459691	1509476	1507873
1386661	1574081	1513802										1519592	1514203	1407491		1460297	1509711	1509284
1533187	1508020	1528630										1520987	1514283	1407791		1460308	1509823	1509626
1552830	1524594	1524425										1521047	1514624	1408309		1460530	1509909	1509912
1496327	1482274	1537960										1521094	1514941	1409111		1460646	1510157	1510411
1492436	1588502	1508281										1521536	1515886	1409218		1460757	1511163	1510554
1482264	1535656	1105922										1521864	1515892	1409690		1461009	1511196	1510814
1486650	1533237	1528697										1522539	1516013	1409830		1461143	1511781	1510824
1476147	1526737	1518363										1522858	1516139	1410380		1461192	1512327	1511228
1322359	1559317	1556858										1523285	1516145	1410471		1461324	1512416	1511240
1373480	1480121	1548700										1523754	1516150	1410577		1461395	1513023	1512079
1458012	1395916	1522160										1524242	1516403	1410655		1461402	1513893	1512344
1454143	1447956	1535656										1524506	1516406	1410782		1461490	1514140	1512349
1355184	1479948	1531718										1524756	1516804	1411049		1461684	1514164	1512425
1394117	1386239	1473385										1524758	1516997	1411219		1461755	1514606	1512432
1351166	1388684	1508554										1524865	1517004	1411258		1461833	1515105	1512794
1548855	1586608	1385035										1524882	1517048	1411709		1461869	1515115	1512988
1508769	1328193	1536916										1525060	1517519	1412116		1462414	1515228	1513027
1545638	1498854	1571983										1525221	1517699	1413418		1462426	1515787	1513969
1490318	1339278	1478500										1525957	1518196	1413485		1462629	1515854	1513977
1464015	1575109	1467350										1525960	1519907	1414394		1462870	1515923	1514234
1395147	1373922	1507127										1526201	1520079	1416796		1463020	1516043	1514594
1553590	1381769	1387974										1526377	1520159	1417931		1463175	1517252	1514657
1465892	1124575	1505679										1526665	1520335	1417950		1463295	1518294	1514873
1475880	1533932	1537817										1527299	1520470	1429877		1463369	1518454	1515029
1545342	1360939	1352308										1527441	1521186	1430338		1463710	1518464	1515603
1472378	1354929	1472258										1527777	1522255	1431171		1463924	1518532	1515846
1548348	1593578	1484069										1528296	1522434	1431177		1464015	1519199	1515865
1513990	1372401	1366693										1528331	1522630	1431886		1464428	1519794	1516363
1361789	1495110	1372420										1528698	1523036	1431978		1464477	1520052	1516399
1513041	1342161	1392386										1529807	1523825	1432167		1464509	1520126	1516932
1524571	1587543	1348965										1529836	1524351	1432825		1464663	1520228	1517002
1350200	1370696	1552645										1529949	1524594	1433203		1464670	1520695	1517094
1528712	1506334	1526737										1530031	1524788	1434243		1464949	1520795	1517122
1459002	1528692	1383313										1530191	1524900	1434513		1465108	1520803	1517246
1383246	1062176	1467657										1530387	1525053	1434808		1465138	1522210	1517381
1353435	1546453	1497317										1530769	1525275	1435136		1465157	1523144	1517646
1588774	1581017	1495853										1531041	1525774	1435482		1465376	1523320	1517659
1536916	1593084	1533021										1531060	1525918	1435842		1465479	1523396	1517800
1582758	1556858	1540632										1531586	1526584	1435913		1465504	1523474	1518325
1506475	1530196	1562884										1531626	1527242	1436344		1465569	1523507	1518329
1395629	1591179	1478382										1532105	1527512	1436483		1465615	1523568	1518332
1376525	1396018	1464285										1532242	1527608	1437232		1465656	1523712	1518555
1518461	1583890	1590547										1532456	1527817	1437947		1465736	1523817	1518749
1379179	1489536	1474423										1532507	1528036	1438826		1465738	1523996	1518991
1495853	1059940	1328040										1533916	1528319	1438879		1465858	1524249	1519041
1536104	1417931	1458586										1534363	1528476	1439679		1465892	1524599	1519193
1538871	1449386	1553590										1534408	1529614	1439813		1466162	1524768	1519217
1492027	1487262	1542703										1534455	1529691	1439908		1466174	1525012	1519735
1569097	1377941	1319384										1534504	1530118	1439925		1466194	1525042	1520002
1503257	1528697	1465736										1534840	1530425	1440052		1466266	1525119	1520688
1518335	1524740	1489072										1535316	1531335	1440217		1466364	1525383	1521050
1557658	1435482	1480448										1535605	1531364	1440856		1466398	1525458	1521100
1582818	1521533	1349376										1536684	1531510	1441725		1467350	1526373	1521215
1536357	1596438	1545787										1536729	1531690	1442407		1467427	1526436	1521457
1543649	1551947	1502071										1536870	1531818	1442563		1467506	1526513	1521524
1480015	1575816	1536224										1538481	1532375	1442612		1467536	1526638	1521655
1508444	1463923	1530915										1540940	1532418	1442722		1467539	1526742	1522078
1378134	1525774	1448051										1541241	1532423	1443004		1467657	1527068	1522164
1524941	1572281	1596875										1541717	1532434	1443092		1468170	1527089	1522530
1472060	1486469	1535216										1542057	1532635	1443103		1468191	1527407	1522728
1476131	1498157	1489172										1542807	1532793	1443186		1468263	1528025	1522844
1576042	1000305	1495110										1543084	1533010	1443303		1468448	1528165	1522908
1461324	1532375	1498689										1543620	1533160	1443321		1468741	1528351	1522968
1554817	1463599	1486650										1543622	1533178	1443685		1469208	1528592	1523496
1361204	1443685	1391285										1544059	1533187	1443791		1469352	1528612	1524511
1599552	1597341	1496327										1544069	1533533	1443968		1469359	1528714	1525287
1533515	1395537	1430811										1544304	1534221	1444287		1469364	1529177	1525379
1381926	1597489	1481799										1544569	1535063	1444358		1469599	1529719	1525463
1372594	1363289	1521924										1544666	1535074	1444359		1469624	1530130	1525758
1538134	1482436	1465138										1544852	1535163	1444527		1470048	1530136	1525793
1532793	1510755	1536314										1545368	1535741	1444712		1470240	1531102	1526350
1465858	1346800	1523594										1545542	1535864	1444803		1470357	1531515	1526538
1543378	1373746	1465337										1546138	1536065	1445047		1470520	1531951	1527413
1552645	1470240	1541865										1546169	1536357	1445105		1471195	1532187	1528790
1375680	1382617	1360452										1546248	1536873	1445338		1471342	1532543	1528800
1482860	1492448	1498481										1546606	1537144	1445357		1471459	1533263	1528818
1527021	1589784	1479643										1546834	1537445	1445386		1471544	1533687	1529337
1560227	1351494	1555071										1547832	1537815	1445399		1471988	1533835	1529588
1480340	1585180	1514484										1547980	1537822	1445525		1471990	1534282	1529742
1572680	1473944	1369475										1548209	1538073	1445686		1472017	1534741	1529765
1537713	1374693	1520899										1548221	1538080	1445711		1472235	1534994	1530149
1473228	1516145	1582818										1548320	1538134	1445789		1472258	1535216	1530268
1452228	1431886	1346969										1548377	1538143	1445903		1472337	1535223	1530441
1510693	1531718	1484192										1548713	1538145	1445938		1472378	1535789	1530624
1518839	1373133	1590792										1548871	1538263	1446091		1472422	1536790	1530633
1465738	1573936	1459691										1549393	1539798	1446156		1472698	1537158	1530926
1518758	1433443	1580414										1549495	1539852	1446213		1472727	1537462	1531272
1484192	1443303	1054703										1549646	1540144	1446347		1473027	1537705	1531596
1547023	1575623	1527620										1550122	1540362	1446501		1473061	1538711	1532033
1453076	1597682	1595137										1550490	1540483	1446565		1473065	1538766	1533014
1502735	1465101	1031666										1551235	1540586	1446575		1473157	1539249	1533566
1515134	1541263	1459153										1551296	1540670	1446754		1473161	1539894	1533663
1587213	1410380	1518983										1551698	1541309	1446755		1473228	1540588	1533799
1455347	1361481	1598062										1553282	1541554	1447080		1473364	1541708	1534224
1533021	1475875	1515029										1553539	1541823	1447272		1473385	1541958	1534662
1512391	1323195	1589968										1553583	1541836	1447345		1473419	1541969	1534919
1369584	1451517	1501457										1553630	1542392	1447387		1473442	1542151	1534957
1476307	1380211	1380357										1553854	1542576	1447536		1473620	1542350	1535000
1513949	1508554	1482436										1553865	1542782	1447584		1474008	1542425	1535402
1516973	1446167	1518335										1554112	1542972	1447730		1474222	1542766	1535407
1501959	1600144	1600632										1554216	1543245	1447868		1474382	1543114	1535704
1368475	1590999	1395147										1554855	1543334	1448161		1474423	1543118	1535961
1552005	1533253	1457816										1555562	1543640	1448224		1474507	1543787	1535966
1499672	1516586	1379351										1555650	1543667	1448245		1474578	1544084	1537474
1547503	1031119	1451158										1555746	1544317	1448367		1475228	1544162	1538783
1530196	1531968	1448895										1555750	1545638	1449292		1475329	1544178	1539127
1497317	1490318	1518532										1555847	1545795	1449386		1475433	1544446	1539707
1522160	1508382	1526624										1556949	1545819	1449619		1475875	1544457	1540005
1588946	1546810	1469527										1557143	1546038	1449623		1475880	1545529	1540036
1482184	1519586	1516010										1557277	1546216	1450169		1476147	1545806	1540208
1470240	1495925	1392990										1557876	1546377	1450769		1476152	1545955	1540964
1481419	1480199	1508449										1562323	1547018	1451355		1476430	1546442	1541087
1467350	1453992	1486008										1562998	1547275	1451532		1476501	1546727	1541105
1554823	1466161	1469364										1564081	1547503	1451546		1476510	1547028	1541435
1346223	1164253	1506475										1564503	1549515	1451638		1476551	1547090	1541740
1110744	1510534	1457521										1566458	1549534	1451796		1476625	1547830	1541819
1536093	1503662	1386918										1566709	1550550	1452377		1476875	1548815	1541865
1591585	1352516	1367889										1566897	1551092	1452728		1476918	1548855	1541943
1167480	1152884	1493407										1567869	1551253	1452879		1477078	1548996	1542121
1466174	1463175	1474222										1568050	1551405	1453269		1477099	1549305	1542150
1054703	1462629	1512988										1569131	1552246	1454129		1477123	1549723	1542318
1360452	1364327	1364563										1571774	1552830	1454192		1477165	1549880	1542431
1535096	1447080	1355369										1577904	1553049	1454249		1477364	1550104	1542483
1541792	1565898	1462573										1580768	1553563	1454587		1477376	1550141	1542614
1551253	1476013	1480168										1582751	1553732	1454779		1477449	1550236	1542919
1520335	1361940	1469624										1584509	1553967	1455232		1477472	1550612	1543060
1469599	1485973	1542425										1584753	1554507	1455290		1477496	1551795	1543288
1475329	1564306	1468184										1586480	1554823	1455340		1477598	1552029	1543351
1365618	1373582	1490098										1587196	1554959	1455360		1477825	1552111	1543702
1443910	1447366	1528290										1587461	1555151	1455517		1477953	1552420	1544017
1515886	1538073	1509123										1587567	1556474	1456299		1478111	1552631	1544020
1354524	1361616	1393315										1587627	1556763	1456399		1478463	1552635	1544080
1058846	1433203	1555080										1588316	1556846	1456870		1478500	1552926	1544135
1478604	1446176	1373618										1589282	1556854	1456920		1478604	1553319	1544154
1580768	1597150	1350752										1590298	1557153	1456923		1478934	1554288	1544203
1509360	1570456	1527519										1590996	1557359	1457384		1479095	1554817	1546146
1509721	1541142	1517659										1591578	1557658	1457533		1479187	1554882	1546223
1538143	1066979	1436628										1592134	1560227	1457562		1479208	1555071	1546372
1451738	1443092	1556656										1592191	1560228	1457564		1479258	1555727	1546506
1591725	1551600	1598769										1592481	1562251	1457566		1479497	1555889	1546512
1591401	1494058	1523916										1592848	1562953	1458592		1479947	1556825	1546906
1511339	1369983	1537784										1593117	1566063	1459189		1479948	1556829	1547020
1522550	1543918	1477472										1593319	1566088	1459204		1480015	1557351	1547431
1333678	1475458	1526167										1594929	1566879	1460702		1480110	1557664	1547594
1548165	1458113	1372563										1595950	1567917	1461068		1480340	1557673	1547635
1389679	1545645	1557646										1596152	1568065	1461394		1480448	1557821	1547697
1395861	1161390	1018691										1596648	1569097	1461420		1480596	1558376	1547714
1590547	1454471	1454113										1597426	1570432	1461467		1480634	1560519	1547765
1467657	1525855	1471544										1597442	1570595	1461483		1480695	1562381	1547815
1475458	1517478	1351740										1597965	1571957	1461571		1481290	1563383	1548061
1468417	1395579	1518464										1599415	1571975	1461584		1481364	1563956	1548308
1481772	1522288	1483557										1599520	1572488	1461781		1481704	1564581	1548623
1548471	1367627	1522550										1600638	1575436	1461943		1481772	1566810	1548672
1347865	1478382	1536009										1600907	1575623	1462044		1481893	1567025	1548709
1524900	1482149	1519360											1576042	1462169		1482264	1568089	1548851
1446232	1365382	1332793											1577550	1462773		1482274	1570453	1548897
1502239	1445399	1540216											1577715	1463115		1482333	1579282	1549303
1556854	1567658	1487345											1578119	1463605		1482382	1583069	1549314
1596900	1592988	1550825											1579272	1463923		1482436	1583730	1549742
1545026	1565022	1485486											1579641	1463983		1482579	1584040	1550279
1503002	1522434	1481893											1581301	1464183		1482659	1584923	1550284
1366194	1511327	1430967											1581405	1464209		1482760	1585126	1550907
1586127	1600157	1451738											1581619	1464414		1482782	1585128	1551095
1454471	1522552	1509200											1582517	1464820		1482860	1586347	1551373
1390055	1445338	1523399											1583552	1465101		1483128	1586714	1551840
1546438	1494621	1541792											1584601	1465485		1483268	1586863	1551951
1473364	1416601	1591725											1585180	1466081		1483422	1586864	1552258
1476501	1597002	1416449											1585462	1466161		1483557	1587029	1552517
1476152	1519911	1497952											1585644	1466190		1483648	1587041	1553343
1530803	1475433	1487590											1586495	1466334		1484004	1587470	1554078
1478500	1393736	1469656											1586609	1466397		1484040	1588108	1554506
1501111	1517042	1455347											1587351	1466522		1484069	1588845	1555082
1533010	1364318	1572928											1589520	1466795		1484175	1588961	1555127
1433625	1527272	1466194											1589529	1466916		1484192	1589547	1555288
1520282	1444358	1484040											1590114	1467111		1484838	1590174	1555563
1451201	1595569	1504439											1590301	1467309		1484970	1590792	1556493
1543456	1588946	1531867											1591290	1468763		1485215	1591077	1556540
1489723	1494336	1447092											1591585	1468907		1485282	1592817	1557113
1557610	1574711	1533575											1591924	1469161		1485399	1593045	1557367
1508562	1499548	1468741											1591989	1469537		1485547	1593168	1557834
1452060	1486844	1552616											1592059	1470437		1485652	1593326	1558964
1518039	1557153	1564765											1592918	1470497		1485862	1594440	1561229
1386918	1458592	1455797											1592979	1470620		1485863	1595018	1561469
1552014	1514380	1480634											1593223	1470783		1485878	1595084	1565554
1359316	1368652	1465035											1593413	1471333		1486008	1595512	1569260
1530915	1387697	1510155											1593427	1471817		1486451	1596022	1573078
1596875	1500568	1383724											1593471	1471831		1486541	1596305	1577121
1549372	1516973	1536446											1593501	1471857		1486650	1596437	1583336
1583212	1511905	1582758											1593963	1472229		1486677	1596525	1583700
1521190	1555909	1326529											1594149	1472267		1486703	1596547	1584148
1460957	1601518	1509260											1594213	1472387		1486915	1596865	1584190
1468191	1479971	1469599											1594373	1472558		1487265	1596883	1585446
1524506	1480970	1590174											1594458	1472618		1487345	1596977	1585609
1446329	1381556	1518758											1595034	1472783		1487804	1597699	1586123
1466364	1347388	1515115											1595218	1472995		1487853	1597821	1588400
1499760	1348890	1489737											1595569	1473416		1487973	1598298	1592211
1510755	1376907	1549880											1595683	1473532		1488441	1598382	1592585
1454398	1376699	1477945											1596028	1474014		1488461	1598922	1594191
1453987	1370040	1305257											1596935	1474024		1488677	1599218	1594999
1533506	1594914	1447956											1598271	1474587		1488761	1599758	1595125
1540216	1363019	1447774											1599215	1474690		1488887	1599792	1595550
1496978	1545638	1063740											1599618	1474933		1488995		1595590
1553583	1376571	1475329											1601124	1475199		1489072		1596619
1593451	1521867	1479095											1601319	1475425		1489172		1598381
1481706	1364809	1163071											1601359	1475449		1489314		1598513
1593471	1563161	1489895												1476110		1489466		1599094
1509285	1543132	1478086												1476268		1489610		1600216
1581619	1456274	1544631												1477271		1489693		1600489
1479208	1010138	1370469												1477579		1489723		1601116
1350552	1528290	1527272												1477799		1489737
1357320	1493422	1518395												1477803		1489851
1568089	1321074	1516586												1478359		1489895
1489540	1324013	1503002												1478492		1490318
1518816	1524773	1516911												1478913		1490368
1374232	1477472	1502125												1478984		1490728
1492570	1354087	1484981												1479847		1490733
1458152	1595981	1459565												1479860		1490791
1453776	1582869	1477568												1479971		1490863
1364327	1597303	1586608												1480198		1490880
1557646	1444527	1490733												1480199		1490939
1447366	1352372	1549723												1480649		1491480
1463599	1513802	1529873												1480877		1491636
1528592	1379347	1477157												1480970		1491717
1532375	1346612	1537036												1481033		1492027
1508449	1596560	1497042												1481595		1492187
1349946	1582312	1355982												1481600		1492313
1544072	1465485	1582474												1481759		1492436
1495110	1355184	1496226												1481816		1492570
1499263	1591260	1366113												1482414		1493298
1494321	1383457	1536011												1482501		1493407
1374885	1500561	1461395												1482805		1493756
1583595	1451753	1578714												1483141		1493858
1513058	1520598	1494058												1483298		1493910
1453474	1514484	1527021												1483491		1493974
1384767	1343272	1454092												1484021		1494030
1513834	1349946	1395496												1484152		1494058
1460297	1359020	1391804												1484522		1494209
1472258	1038382	1593451												1484542		1494321
1527407	1479187	1347260												1484966		1494336
1464428	1486451	1348871												1484983		1494621
1457883	1561409	1483422												1484996		1494709
1395234	1450974	1383246												1485295		1494781
1481364	1151236	1503668												1485549		1494808
1499551	1347812	1467427												1485660		1494920
1453374	1520455	1374824												1485663		1495028
1476918	1565943	1321731												1485754		1495103
1523474	1569885	1523452												1485755		1495110
1391285	1479643	1548854												1485943		1495176
1456274	1452029	1540005												1486058		1495836
1596209	1365458	1079491												1486266		1495845
1500095	1465376	1456379												1486420		1495853
1500038	1540464	1483001												1486469		1496199
1491717	1523693	1488441												1486576		1496222
1527940	1336474	1396454												1486844		1496226
1482274	1574510	1453634												1486930		1496248
1526638	1481595	1537721												1486960		1496327
1528113	1511596	1514329												1487288		1496505
1592582	1388400	1461402												1487450		1496522
1450974	1471544	1381926												1487579		1496894
1477123	1395884	1601032												1487666		1496896
1554083	1459204	1513001												1487712		1496926
1484838	1509200	1477953												1487743		1497021
1532543	1596900	1451026												1488884		1497042
1387328	1447730	1465573												1488953		1497176
1465656	1582447	1387399												1489127		1497290
1531586	1534907	1516339												1489324		1497304
1341725	1374460	1548494												1489536		1497317
1370097	1536104	1549372												1489690		1497344
1576785	1374151	1327071												1489845		1497352
1467536	1447868	1532048												1490437		1497566
1544675	1553228	1416378												1490465		1497643
1500271	1391444	1510157												1490934		1498381
1347010	1555557	1557738												1491432		1498426
1507471	1586212	1381032												1491454		1498476
1320314	1515552	1493858												1491566		1498571
1538073	1441725	1449220												1491578		1498841
1526140	1480877	1353746												1492156		1499148
1377522	1535297	1534217												1492300		1499260
1510371	1330948	1482860												1492602		1499263
1540632	1472724	1517002												1492697		1499551
1530345	1480596	1504072												1493017		1499570
1463295	1558686	1599803												1493732		1499760
1359783	1601148	1442409												1494345		1500038
1557725	1378586	1506641												1494530		1500095
1379184	1468748	1485516												1495276		1500193
1383313	1516997	1459294												1495417		1500658
1382080	1521990	1596525												1495540		1500684
1318131	1487804	1553343												1495671		1501111
1458586	1450169	1335829												1496096		1501533
1457466	1464015	1471990												1496254		1501734
1508822	1383626	1384767												1497398		1501922
1526167	1342066	1523507												1497478		1501959
1385014	1074021	1551095												1497797		1501966
1483544	1383835	1373222												1498232		1502239
1378586	1516911	1509309												1498497		1502506
1496505	1576104	1514380												1498536		1502507
1515787	1453269	1457883												1498717		1502557
1467026	1375469	1454398												1498854		1502576
1536138	1601554	1503601												1498909		1502584
1517048	1386462	1477825												1499053		1502735
1393292	1567789	1505838												1499300		1502884
1395063	1321356	1587470												1499303		1503002
1490791	1455797	1456274												1499749		1503096
1481893	1527620	1588502												1499904		1503257
1478934	1595331	1115782												1500105		1503560
1336474	1360356	1472235												1500466		1503601
1470386	1386241	1534224												1500487		1503627
1456043	1451638	1489693												1500712		1503668
1480596	1440856	1527407												1500967		1503848
1453722	1484996	1490939												1501177		1503858
1383244	1386950	1540464												1501516		1504151
1471990	1014724	1479948												1501738		1504306
1454892	1571274	1495176												1502171		1504326
1337482	1164248	1486541												1502256		1504426
1442967	1366194	1454607												1502304		1504439
1530819	1346223	1144010												1503119		1504691
1485083	1324267	1511614												1503772		1504756
1376005	1409690	1537602												1503780		1505132
1364318	1474933	1457077												1503950		1505569
1372563	1325012	1497643												1504155		1505679
1543245	1349367	1547697												1504791		1505728
1348301	1357279	1549499												1505098		1505838
1384248	1518839	1592288												1505811		1506074
1504426	1353435	1347865												1506194		1506133
1360245	1501922	1565158												1506334		1506137
1519907	1497317	1372558												1506578		1506142
1487590	1537602	1377346												1506663		1506475
1465108	1598074	1489610												1506846		1506587
1369872	1568243	1548828												1507217		1506641
1572488	1503257	1504426												1507599		1506737
1468448	1511776	1511540												1507670		1506753
1496926	1601144	1535096												1507700		1506812
1462426	1470515	1383596												1508089		1507127
1504151	1560177	1438866												1508130		1507145
1544364	1561442	1477828												1508214		1507170
1482180	1390810	1468096												1509316		1507244
1587041	1538143	1596547												1509395		1507941
1461850	1593451	1394253												1509398		1508011
1586495	1601212	1472920												1509666		1508020
1464509	1557738	1394291												1509737		1508037
1533160	1513646	1488672												1510503		1508248
1584834	1392195	1515552												1510834		1508281
1448693	1536357	1538711												1510925		1508444
1141391	1586127	1502576												1511317		1508449
1510024	1517004	1448092												1511344		1508554
1396454	1534220	1500312												1511474		1508562
1369466	1485755	1518536												1511776		1508769
1555750	1599803	1549423												1511895		1508822
1471373	1583309	1524249												1511898		1508834
1508379	1390474	1536150												1513073		1508859
1525042	1565158	1486451												1514327		1509123
1496226	1370097	1481243												1514339		1509200
1511848	1383935	1464660												1514748		1509213
1354395	1365292	1461755												1514758		1509260
1381524	1571983	1372168												1514784		1509285
1368542	1584744	1437973												1514864		1509286
1369521	1378888	1390225												1515076		1509309
1557085	1476110	1521867												1515248		1509360
1494209	1001405	1453576												1516224		1509401
1476952	1366537	1554857												1516467		1509587
1534282	1542782	1371978												1516815		1509721
1487296	1469826	1535783												1516818		1509827
1457179	1360320	1458113												1516925		1510003
1374421	1490939	1506137												1517016		1510024
1370017	1465504	1586212												1517701		1510371
1526856	1490437	1462426												1517774		1510693
1480634	1407491	1364222												1518127		1510755
1394291	1598347	1369584												1518168		1510886
1566879	1563382	1348301												1518300		1510902
1465376	1466174	1550499												1518580		1510978
1364265	1539712	1506452												1518826		1511243
1524223	1360452	1529156												1519225		1511327
1464477	1486058	1482782												1519605		1511339
1481290	1538871	1461193												1519746		1511347
1410353	1378989	1515977												1520165		1511524
1465721	1377042	1470048												1520693		1511540
1589547	1543456	1530803												1521296		1511614
1354959	1390052	1390373												1521516		1511848
1541805	1463020	1495263												1521533		1511890
1477598	1535741	1542139												1522288		1511905
1356221	1502506	1374421												1522552		1512204
1582869	1364222	1172053												1522620		1512391
1477376	1499749	1594000												1522749		1512668
1507703	1035056	1598512												1523031		1513001
1531873	1475730	1455582												1523172		1513734
1488753	1528036	1515854												1523388		1513802
1500586	1372492	1497352												1523607		1513834
1470048	1395610	1467506												1523678		1513864
1527416	1345938	1473228												1523693		1514118
1545922	1375147	1489540												1524773		1514209
1437683	1566321	1525472												1525855		1514329
1545262	1335409	1472727												1526154		1514465
1322491	1493662	1490318												1526165		1514476
1471814	1589336	1548709												1526325		1514484
1350034	1516010	1557673												1526452		1514747
1514476	1477596	1454892												1526741		1514839
1579282	1595237	1451329												1526800		1514924
1360061	1532410	1499551												1526853		1515079
1522210	1439813	1452939												1527064		1515134
1341565	1127229	1593638												1527232		1515220
1478208	1460646	1480110												1527613		1515225
1503627	1570238	1471086												1527653		1515241
1526742	1347686	1176600												1528110		1515926
1532036	1474423	1540333												1528205		1515975
1513023	1494345	1519912												1529878		1516010
1557673	1485660	1507941												1530273		1516079
1391229	1601755	1452985												1530358		1516083
1459039	1587213	1374450												1531204		1516339
1491480	1451834	1503858												1531613		1516366
1321731	1351260	1527589												1531714		1516482
1589520	1537144	1508562												1531829		1516580
1550427	1498571	1591401												1531968		1516586
1500658	1515079	1372410												1532027		1516911
1344997	1491454	1431310												1532607		1516973
1444183	1593550	1566005												1532775		1517042
1496248	1528472	1347700												1532900		1517218
1473780	1573040	1507113												1532976		1517295
1493752	1362921	1465504												1533201		1517499
1363977	1596581	1557448												1533317		1517516
1346716	1446754	1515846												1534150		1518039
1354679	1461448	1511339												1534220		1518160
1156345	1515977	1494808												1535589		1518335
1499148	1509213	1448129												1535616		1518461
1566005	1469537	1482333												1535754		1518536
1537158	1569097	1536138												1536235		1518758
1482760	1518580	1473027												1536432		1518816
1349376	1326131	1355922												1537003		1518839
1486677	1522550	1453569												1537654		1518983
1601359	1381900	1485927												1537800		1519133
1448092	1551405	1546179												1537932		1519360
1511196	1599012	1546527												1538075		1519577
1453576	1513990	1483235												1538795		1519586
1435031	1447387	1515851												1538817		1519838
1492187	1453776	1601518												1539004		1519912
1330980	1528161	1373133												1539293		1520136
1433443	1509286	1469302												1539812		1520255
1516580	1587850	1140241												1540000		1520282
1492564	1528712	1529695												1540106		1520598
1373264	1466162	1481165												1540278		1520780
1376789	1350209	1492355												1540842		1520864
1508281	1584681	1350069												1540966		1520899
1495176	1350320	1479794												1541145		1521190
1345409	1564058	1446232												1541253		1521237
1490863	1522160	1463177												1541429		1521867
1570453	1438826	1479208												1541664		1521924
1540464	1544317	1470386												1541840		1522048
1528036	1392327	1396018												1542402		1522160
1495645	1489737	1473161												1542506		1522411
1499548	1477568	1391973												1542521		1522550
1531060	1015056	1557440												1542523		1522906
1474666	1576042	1394066												1542596		1523152
1353195	1361789	1595812												1542618		1523307
1473889	1489916	1378177												1542648		1523399
1542151	1587224	1513734												1542754		1523594
1524471	1531873	1464393												1542977		1523799
1446346	1547821	1488753												1543132		1523822
1485927	1595586	1476501												1543725		1523916
1368492	1390506	1457561												1544051		1524223
1548828	1395063	1535789												1544092		1524425
1458917	1499570	1379184												1544096		1524471
1448896	1464393	1468199												1544811		1524571
1571975	1386854	1444183												1545062		1524729
1501103	1592244	1526742												1545582		1524941
1449027	1377346	1464670												1545645		1525026
1416449	1407791	1474498												1546191		1525938
1545955	1597095	1528451												1546327		1526140
1601029	1376077	1504596												1547271		1526167
1554507	1365109	1479258												1547821		1526608
1588845	1506753	1495103												1548034		1526624
1485399	1444133	1500586												1548161		1526693
1494035	1485878	1375680												1548404		1526737
1482230	1450323	1557085												1548540		1526856
1493009	1593246	1475866												1548675		1527021
1455797	1448244	1544080												1548726		1527200
1588464	1552877	1492984												1548735		1527312
1596977	1585777	1506142												1549270		1527416
1555080	1533187	1532543												1549319		1527519
1516804	1523607	1388116												1550293		1527589
1543283	1489534	1466266												1550370		1527620
1538263	1579382	1597263												1550624		1527682
1498381	1592493	1552372												1551512		1527832
1347260	1598512	1319340												1551600		1527940
1468346	1360444	1477151												1551947		1528113
1533943	1517516	1506460												1552115		1528191
1541309	1465656	1473442												1552537		1528451
1469352	1361258	1484154												1552580		1528472
1505298	1530244	1477364												1554693		1528597
1144134	1392278	1588470												1555142		1528630
1549499	1444803	1479222												1555146		1528637
1516403	1387328	1484838												1555378		1528697
1470027	1361146	1464935												1555557		1528712
1516139	1456923	1165324												1555570		1528810
1373618	1323035	1494637												1555734		1528841
1457107	1394117	1543283												1555901		1529084
1489870	1570631	1393736												1556431		1529446
1479948	1445686	1374885												1557103		1529552
1533916	1557665	1518454												1557665		1529873
1536150	1592998	1387328												1558503		1530196
1455299	1562549	1517800												1558686		1530345
1461755	1445903	1502740												1559080		1530578
1523996	1445953	1377456												1559127		1530795
1509823	1356380	1538719												1559317		1530803
1496982	1479095	1505826												1559461		1530811
1385030	1595680	1377103												1559527		1530819
1469624	1504756	1601029												1559951		1530915
1525938	1540670	1507873												1560177		1530921
1508167	1575469	1438176												1560451		1531093
1510886	1343381	1494209												1561253		1531357
1359117	1340510	1457102												1561279		1531752
1523144	1500095	1448073												1561409		1531867
1465240	1348861	1334600												1561442		1531873
1472724	1490880	1550427												1561619		1532036
1334600	1372523	1377588												1562255		1532048
1599618	1535074	1485215												1562277		1532173
1552420	1534221	1386412												1562467		1532248
1457102	1344090	1353499												1562549		1532256
1457700	1367889	1478111												1562600		1532410
1061866	1322491	1504306												1562924		1533021
1536065	1525053	1528165												1563161		1533237
1473065	1549130	1545208												1563211		1533294
1454618	1556474	1504151												1563382		1533305
1466053	1502171	1468873												1563396		1533506
1448453	1478208	1463493												1563716		1533515
1396117	1391565	1482125												1563996		1533575
1533575	1511898	1451753												1564111		1533714
1566063	1525127	1473157												1564306		1533721
1469208	1473004	1530345												1564354		1533932
1594000	1557646	1525758												1564424		1533943
1377941	1590432	1000305												1564533		1534217
1412731	1515076	1353562												1564680		1534357
1349083	1599666	1547878												1564778		1534907
1341498	1499296	1597699												1564781		1534936
1512527	1456043	1484230												1565022		1535096
1490244	1580716	1557504												1565278		1535233
1534504	1446213	1461833												1565898		1535290
1578714	1092864	1361034												1565900		1535656
1457119	1071190	1524471												1566228		1535783
1504691	1578751	1596305												1566321		1536093
1378100	1555142	1534907												1566922		1536104
1377806	1018691	1548672												1566968		1536138
1593501	1582916	1515134												1567658		1536150
1505399	1506464	1598298												1567789		1536314
1327299	1474507	1386661												1567989		1536371
1517699	1493858	1493974												1568134		1536446
1366687	1532248	1366133												1568243		1536916
1523712	1322460	1480695												1568251		1537005
1566725	1352670	1384248												1568504		1537036
1508224	1368110	1476748												1568658		1537552
1484590	1546843	1522251												1568882		1537602
1520255	1589529	1441627												1568964		1537713
1152884	1527832	1546050												1569021		1537721
1575436	1374048	1492285												1569030		1537784
1358140	1477776	1512391												1569123		1537817
1116047	1555901	1355789												1569150		1537960
1015056	1392894	1370951												1569195		1537999
1365502	1483794	1542151												1569495		1538864
1517295	1436483	1459002												1569508		1538871
1597263	1394066	1511848												1569662		1539118
1494336	1487973	1518839												1569679		1539157
1390652	1552867	1511905												1569774		1539671
1474008	1377098	1478508												1569885		1539681
1535864	1488461	1495435												1570125		1539712
1319968	1489610	1510371												1570238		1540039
1500312	1518536	1477376												1570409		1540181
1352372	1528319	1523296												1570456		1540216
1390768	1482501	1459039												1570631		1540333
1494920	1600512	1547830												1570864		1540464
1450323	1529446	1496522												1571215		1540632
1442994	1394253	1544162												1571274		1540644
1518532	1543649	1459184												1571592		1541014
1324426	1496096	1530921												1571601		1541263
1452939	1522255	1511240												1571759		1541605
1534357	1592666	1520282												1571830		1541792
1556703	1344172	1513440												1571852		1541805
1519586	1395154	1379918												1572278		1542924
1457033	1572602	1547023												1572281		1543176
1376699	1467007	1541435												1572402		1543283
1486915	1574310	1414357												1572414		1543378
1379970	1386453	1497290												1572482		1543406
1482333	1586285	1494321												1572602		1543456
1447950	1489324	1357504												1572843		1543649
1519912	1366113	1543456												1573006		1544003
1584923	1529552	1391276												1573040		1544031
1552111	1549423	1457599												1573151		1544072
1508020	1322266	1509213												1573198		1544353
1455318	1558503	1381561												1573297		1544364
1378081	1527608	1482455												1573406		1544631
1530811	1446575	1529446												1573597		1544675
1372134	1392018	1442967												1573879		1544678
1496831	1536446	1458618												1573936		1544695
1347812	1485652	1595586												1573944		1544807
1453008	1438879	1359316												1574081		1545013
1476915	1453722	1596865												1574310		1545026
1537999	1557725	1588146												1574383		1545262
1389865	1475859	1509284												1574474		1545342
1448191	1452879	1520688												1574510		1545731
1485215	1591299	1465208												1574611		1545922
1554333	1467693	1528592												1574711		1545960
1489172	1389923	1503150												1574845		1546050
1176600	1147477	1542121												1574876		1546179
1505838	1564778	1382080												1574963		1546338
1587078	1574876	1549709												1575061		1546438
1537462	1463177	1350552												1575109		1546453
1533932	1484175	1381759												1575150		1546790
1457453	1374824	1516366												1575209		1546810
1388684	1573597	1546843												1575360		1547023
1325435	1536235	1490728												1575469		1547878
1363300	1541836	1328137												1575591		1548165
1446075	1545026	1493003												1575816		1548348
1539798	1347010	1586658												1576076		1548371
1549544	1594941	1492570												1576104		1548471
1386453	1537960	1457700												1576377		1548494
1487804	1591463	1553228												1576602		1548700
1372550	1467427	1379739												1576665		1548721
1391804	1543406	1484045												1576699		1548828
1600632	1502584	1521237												1576877		1548854
1568082	1455290	1546512												1576904		1549130
1456020	1529691	1450694												1576972		1549264
1522048	1457077	1593246												1577141		1549372
1463491	1455582	1590398												1577180		1549417
1537817	1351086	1524223												1577371		1549423
1476301	1547271	1533294												1577482		1549499
1391043	1491770	1530819												1577746		1549544
1565943	1387974	1456642												1577917		1549604
1544457	1481806	1116047												1577954		1549709
1346466	1106105	1376132												1578203		1550427
1508554	1570125	1460454												1578296		1550499
1383483	1595034	1459009												1578668		1550825
1470520	1411219	1493578												1578751		1550913
1542425	1540144	1521215												1578840		1551079
1537144	1482184	1471082												1578977		1551388
1444133	1601490	1156345												1579250		1551716
1351920	1335829	1460128												1579277		1551958
1557448	1593427	1530244												1579382		1552005
1536371	1345133	1534741												1579453		1552014
1530118	1489644	1364399												1579461		1552255
1544353	1528810	1476967												1579544		1552283
1538080	1511764	1455994												1579556		1552372
1472727	1543725	1394117												1579623		1552645
1596286	1505679	1541014												1579640		1552665
1373922	1542618	1499448												1579909		1552867
1480695	1455501	1439461												1580221		1552877
1456576	1520470	1518816												1580222		1553141
1367844	1350842	1346716												1580227		1553234
1357279	1514339	1458211												1580386		1553276
1585644	1591290	1537005												1580716		1553454
1601518	1572414	1476430												1581017		1553590
1454281	1517048	1522728												1582312		1553637
1474686	1572680	1348925												1582447		1553972
1480992	1482760	1528113												1582551		1553987
1488672	1474672	1525042												1582568		1554083
1172053	1515886	1498571												1582593		1554103
1528165	1359587	1515241												1582916		1554333
1475859	1318131	1297275												1583071		1555080
1470338	1383246	1542350												1583309		1555165
1350091	1488953	1384994												1583501		1555327
1474423	1393096	1462870												1583551		1555346
1488549	1347030	1473004												1583656		1556487
1377103	1564354	1526739												1583890		1556656
1540670	1432167	1527200												1584065		1556703
1533294	1512068	1510554												1584609		1556858
1452591	1470497	1555082												1584744		1557085
1556474	1591989	1541708												1584817		1557448
1476551	1509106	1450682												1584924		1557467
1486987	1500340	1535233												1585139		1557504
1481704	1329057	1497344												1585777		1557610
1596305	1577180	1321135												1585912		1557627
1506137	1351971	1477123												1585975		1557646
1545368	1554693	1518160												1586247		1557725
1510003	1332337	1471459												1586282		1557738
1367862	1569195	1530196												1586285		1557900
1502125	1506475	1460431												1586292		1560762
1503858	1161978	1585128												1586684		1562057
1326131	1517699	1586864												1586748		1562884
1546338	1370995	1472337												1586775		1562935
1489672	1491432	1544678												1587157		1564058
1350651	1507599	1502616												1587224		1565158
1508544	1579544	1586462												1587487		1565943
1490368	1490244	1464428												1587543		1566005
1487538	1485663	1291525												1587640		1566725
1370719	1364399	1467345												1587645		1568082
1358824	1594063	1537705												1587850		1570085
1455676	1601487	1368110												1588095		1571951
1601631	1369147	1508859												1588626		1572680
1525275	1385957	1395834												1588836		1576673
1487265	1461324	1478604												1589336		1576785
1465569	1570864	1522164												1589592		1577919
1543640	1509360	1473780												1589613		1578714
1372410	1576602	1479178												1589642		1580414
1379809	1392593	1500271												1589784		1582474
1456599	1378134	1470027												1589798		1582758
1511829	1120711	1065281												1589921		1582818
1465736	1370343	1471543												1590387		1582869
1395496	1377456	1558376												1590432		1583212
1587470	1471857	1546084												1590549		1583312
1466162	1507471	1370719												1590999		1583595
1535605	1468290	1526856												1591179		1584681
1539157	1561619	1496258												1591299		1584834
1375711	1569662	1384361												1591463		1585058
1511764	1477945	1535407												1591779		1586127
1448407	1579453	1477423												1591785		1586212
1512098	1449623	1518332												1592009		1586658
1523916	1323600	1385076												1592193		1586772
1468290	1514748	1453008												1592493		1586879
1490916	1584817	1528612												1592666		1586906
1496199	1481788	1363237												1592685		1586987
1579641	1474666	1520695												1592988		1587034
1388883	1449027	1395861												1592998		1587078
1476868	1460641	1535297												1593084		1587213
1511347	1485516	1572680												1593431		1587789
1456497	1598962	1514209												1593485		1588464
1327071	1140241	1463924												1593550		1588470
1488663	1377508	1497033												1593578		1588502
1536729	1510834	1550019												1593588		1588774
1514329	1588626	1466162												1593642		1588946
1593045	1451738	1336444												1593717		1589968
1589282	1508011	1522411												1593730		1590358
1560762	1489127	1598922												1593794		1590398
1476547	1459039	1491717												1593852		1590547
1459378	1583595	1531752												1594019		1591216
1534217	1533305	1480451												1594063		1591260
1494799	1476131	1324013												1594130		1591401
1369688	1376086	1520228												1594171		1591689
1519360	1553987	1539671												1594582		1591725
1555165	1474008	1545960												1594628		1591901
1376269	1473532	1553276												1594720		1592244
1484970	1379970	1461567												1594941		1592288
1508011	1049721	1395610												1595181		1592582
1523754	1584065	1454803												1595283		1593109
1473442	1514758	1522048												1595331		1593240
1540586	1434243	1453776												1595400		1593246
1032352	1332087	1494030												1595679		1593451
1474215	1586462	1588845												1595848		1593519
1549515	1466334	1341725												1595981		1593638
1377712	1450179	1325533												1596010		1594000
1453663	1335643	1584923												1596243		1594858
1552372	1576665	1477449												1596435		1594914
1483648	1548494	1515079												1596438		1595137
1544162	1467536	1390652												1596511		1595513
1461633	1388510	1525127												1596560		1595586
1514164	1477165	1551958												1596581		1595680
1500164	1528476	1520795												1596696		1596209
1511540	1538817	1367223												1596907		1596286
1486008	1387290	1511196												1596915		1596875
1534363	1448896	1551079												1597032		1596900
1381016	1463710	1374032												1597095		1597002
1540362	1562924	1533835												1597150		1597074
1544317	1485943	1492313												1597185		1597088
1513893	1468170	1497542												1597212		1597263
1352145	1512668	1442768												1597303		1598062
1480783	1467110	1517218												1597341		1598074
1520899	1389313	1373922												1597489		1598202
1484609	1471342	1512425												1597682		1598512
1358145	1503002	1475228												1597764		1599288
1519581	1498481	1448143												1597771		1599552
1503785	1348346	1349062												1597799		1599803
1475445	1523594	1443812												1598061		1600632
1451908	1491679	1453076												1598287		1601029
1503560	1511474	1456131												1598347		1601518
1507170	1333955	1591689												1598584		1601554
1325974	1455676	1359484												1598746		1601631
1547028	1451329	1471988												1598777
1395834	1473620	1530213												1598962
1442409	1542139	1507861												1599012
1029637	1362444	1467539												1599059
1448945	1456497	1588464												1599201
1520159	1587034	1355237												1599241
1487853	1555378	1529337												1599598
1526436	1387587	1493298												1599624
1597965	1594019	1469352												1599666
1485923	1560071	1477598												1599678
1467380	1058846	1474418												1599941
1488995	1373776	1543378												1599978
1551716	1544631	1481704												1600144
1477078	1485923	1464797												1600157
1453248	1487296	1470520												1600237
1596865	1544811	1488435												1600297
1461395	1514747	1492989												1600328
1467007	1578714	1483414												1600498
1362520	1462870	1504032												1600512
1505412	1110744	1528714												1600533
1549305	1359682	1344598												1600667
1507905	1594130	1466056												1600670
1514283	1455193	1392856												1600718
1560228	1137024	1472422												1600731
1363237	1537932	1381769												1600863
1476510	1460308	1473065												1601144
1455193	1327779	1550913												1601148
1348871	1552580	1485863												1601212
1520079	1473983	1529177												1601469
1453614	1491566	1496926												1601490
1362288	1500105	1350746												1601498
1348965	1474215	1471012												1601590
1548377	1494808	1510003												1601665
1456510	1499148	1365111												1601669
1529836	1529873	1473244												1601755
1496896	1374232	1385014
1529614	1061866	1457179
1533305	1540750	1594858
1510844	1358871	1373830
1596547	1500038	1523144
1349062	1346268	1564058
1515220	1479208	1544084
1552255	1502557	1453515
1507609	1598711	1501734
1549264	1417175	1477596
1416378	1521190	1565943
1595512	1319860	1552035
1508685	1516079	1464509
1525053	1501966	1516482
1359682	1518826	1496199
1410938	1392990	1507697
1468356	1365018	1595125
1495925	1520079	1537999
1470515	1341565	1553454
1575623	1354395	1446136
1586212	1297275	1496248
1510043	1589798	1461236
1518196	1488677	1347007
1472698	1456379	1520052
1501966	1433625	1376269
1483241	1388821	1381758
1524249	1523825	1482659
1482436	1492436	1498381
1532423	1362083	1461671
1453071	1471195	1554817
1494781	1484004	1534994
1507941	1527312	1460464
1387974	1375812	1458626
1543334	1466266	1461449
1334985	1351757	1588400
1576673	1593642	1531596
1595034	1592009	1503961
1501922	1585644	1373260
1451021	1545582	1323387
1466945	1534150	1486386
1394233	1369978	1447255
1493422	1498536	1506022
1528319	1492313	1507374
1041319	1499263	1463601
1477157	1586775	1336367
1531818	1596907	1533721
1457334	1533010	1513977
1502740	1474024	1372126
1505529	1530795	1465157
1503619	1353063	1447902
1513712	1079767	1586387
1368227	1439908	1462630
1550490	1567989	1555346
1492448	1513926	1522844
1532187	1384833	1005889
1514839	1306538	1378752
1483918	1533515	1379809
1436628	1504306	1529588
1458792	1440217	1546727
1396706	1572278	1356478
1504306	1542754	1041319
1504602	1566005	1551716
1366113	1537815	1502557
1593240	1569030	1367505
1461490	1544364	1437982
1457599	1545787	1377941
1456382	1536224	1514164
1555327	1552246	1546810
1488461	1588836	1492436
1375147	1349700	1477142
1352963	1471575	1461143
1356380	1546233	1547020
1456379	1370951	1481020
1381090	1478934	1543351
1530921	1449798	1500696
1490392	1573151	1515787
1468849	1582593	1378100
1386241	1506578	1482920
1319860	1447584	1535966
1502298	1408309	1486525
1485282	1533714	1497021
1592979	1594213	1481348
1356753	1546038	1454143
1468968	1500684	1480494
1523307	1585462	1470357
1532635	1593963	1371386
1464949	1540278	1496317
1443806	1481816	1388043
1366756	1589520	1438082
1384157	1508037	1465240
1497955	1576673	1463096
1394110	1450682	1498674
1601319	1544096	1505399
1545819	1326827	1506737
1562381	1531204	1532033
1469935	1448191	1458917
1555847	1513073	1481016
1503770	1413485	1496261
1518983	1598777	1473371
1548996	1378007	1588961
1537721	1360445	1333389
1459184	1578840	1532173
1508505	1480448	1568082
1523825	1460297	1509286
1351582	1384767	1518749
1475150	1328040	1588108
1351740	1576076	1477496
1528637	1446091	1392327
1593223	1456131	1530811
1541263	1323517	1367154
1367223	1471459	1360061
1411741	1514624	1481333
1587789	1537003	1542607
1506587	1499053	1593240
1526584	1545731	1533943
1597088	1513712	1523817
1485863	1334309	1411485
1488887	1530811	1510024
1529177	1457384	1367627
1528331	1577715	1515228
1324592	1483431	1468964
1589968	1356084	1351799
1542392	1391998	1532036
1505401	1484609	1556540
1504439	1513864	1485282
1365111	1550163	1557610
1396194	1487288	1460530
1547275	1452060	1505569
1512416	1410353	1505798
1059115	1540362	1391043
1487793	1586282	1321719
1461402	1530273	1517646
1345849	1382080	1479128
1497352	1577919	1583212
1457816	1457033	1357279
1479548	1488887	1555327
1454548	1538145	1527682
1534936	1594458	1548371
1364563	1453515	1508037
1549604	1471333	1343115
1518454	1583501	1487853
1484820	1480110	1392826
1540333	1573944	1521050
1336367	1480992	1457903
1455227	1443321	1349107
1519592	1482230	1456382
1388116	1600328	1333678
1494030	1481383	1482760
1551698	1581301	1523799
1340641	1511344	1394652
1448143	1347043	1394114
1536870	1527682	1503096
1590792	1367844	1542318
1455764	1389618	1500865
1506854	1540966	1455664
1493192	1560227	1538766
1383724	1387305	1471717
1320654	1460530	1350043
1460308	1514924	1369872
1414621	1344199	1455401
1550550	1479353	1562381
1596525	1435031	1459389
1582751	1486117	1496889
1562935	1569021	1528637
1456482	1488761	1528712
1494637	1381758	1456510
1515892	1479113	1557725
1486398	1343225	1496369
1394932	1343115	1390768
1554288	1503780	1512327
1495103	1474222	1452460
1452029	1319384	1542483
1513734	1596696	1339519
1528841	1347700	1368542
1479128	1537713	1515118
1526513	1384036	1594440
1466266	1475880	1447366
1483422	1580221	1455318
1552665	1483268	1465218
1536873	1533506	1530268
1441683	1458211	1454622
1535290	1350043	1550067
1586480	1339933	1497176
1506812	1467353	1412731
1528472	1346571	1492187
1458460	1551079	1526693
1557153	1119535	1528800
1531335	1542523	1509623
1534221	1003500	1068210
1483665	1577371	1515923
1334980	1465869	1377522
1326529	1525026	1550236
1459280	1463295	1352145
1582474	1514283	1489851
1319340	1541823	1447828
1359344	1589921	1469070
1548721	1494920	1598382
1546179	1366687	1523712
1521186	1385889	1534936
1595586	1412116	1539157
1339505	1574474	1497659
1513864	1338060	1593519
1465679	1480340	1352604
1557900	1492187	1498157
1550913	1360264	1484050
1503128	1591585	1483766
1470959	1527232	1589547
1511399	1513834	1497662
1385235	1550499	1548855
1481165	1437947	1437432
1373222	1519225	1467419
1442351	1477449	1552111
1450008	1344997	1488663
1533687	1430811	1446665
1597074	1508769	1525383
1454879	1516482	1550612
1537705	1497304	1487572
1482916	1028090	1541740
1591578	1536314	1596286
1527299	1514476	1382688
1385627	1519360	1464828
1446249	1531093	1545342
1515923	1598769	1508020
1483557	1437982	1552635
1469227	1335238	1471575
1462138	1464477	1365502
1554855	1447512	1585609
1365180	1380612	1566810
1552635	1595683	1527413
1460890	1447272	1474406
1378752	1490733	1503459
1530425	1580386	1554103
1469826	1469364	1509382
1374861	1359997	1354895
1524788	1519907	1448896
1030640	1490098	1503136
1439461	1551092	1367862
1454771	1481799	1370916
1484053	1461672	1549417
1371914	1527519	1481772
1466518	1341214	1498092
1595950	1370356	1449510
1474672	1451144	1524599
1577550	1373392	1350320
1594929	1006973	1509587
1546834	1527940	1167480
1531515	1470959	1454657
1140161	1391973	1483006
1375585	1586292	1396455
1472235	1351398	1463314
1459153	1548735	1455850
1462606	1557610	1332728
1487284	1467111	1029637
1291525	1448453	1488869
1461009	1507244	1032352
1325533	1597799	1467960
1463601	1542648	1465721
1510270	1569679	1366486
1479258	1379179	1597002
1489493	1533294	1550270
1520136	1598202	1541805
1509587	1518127	1387210
1548320	1395857	1526148
1527512	1571957	1552867
1553987	1563716	1449798
1494565	1570409	1476510
1472422	1542521	1479242
1390474	1376005	1453248
1365018	1562600	1394932
1442589	1446329	1359344
1444314	1594149	1513834
1534741	1536138	1446249
1507697	1496254	1500328
1596437	1342995	1598202
1390831	1492156	1511524
1496847	1389636	1395733
1518794	1512218	1479187
1521094	1522411	1550279
1596648	1516406	1502724
1389618	1365027	1457807
1501533	1436344	1595550
1533263	1456599	1527089
1389541	1541309	1597821
1506181	1483128	1483861
1481514	1498426	1586127
1487342	1351920	1501971
1497574	1463115	1566725
1468879	1446346	1480254
1482659	1483648	1473983
1550499	1455764	1521990
1445692	1324971	1450618
1452460	1477953	1460235
1357394	1476501	1443749
1593413	1599618	1174567
1385035	1346466	1481182
1459691	1596243	1499023
1457807	1501959	1491293
1590298	1571759	1598074
1355982	1578119	1512204
1544807	1592979	1382471
1515079	1538075	1530926
1549646	1355227	1414621
1509309	1582758	1555165
1363816	1319647	1506812
1457561	1370469	1389670
1534840	1483557	1500658
1490728	1543667	1596883
1556829	1513949	1357931
1391899	1499303	1501111
1465397	1390517	1382732
1516145	1549499	1448945
1499260	1540632	1393965
1504178	1411709	1390214
1586906	1572488	1482382
1443725	1601469	1457528
1545806	1508859	1528841
1528296	1458157	1465108
1068210	1389831	1541958
1519199	1551512	1348102
1543667	1485415	1515220
1583069	1583212	1381604
1556846	1430338	1363415
1503008	1468972	1533661
1466530	1599215	1595512
1370356	1340734	1495154
1472337	1568964	1506587
1492669	1131776	1471233
1446621	1537822	1438865
1531752	1163071	1481447
1554959	1357487	1537158
1447312	1485863	1379220
1528191	1330851	1576785
1490477	1466190	1351314
1518552	1532607	1376005
1471900	1478913	1528818
1477496	1442994	1472615
1518294	1564424	1555308
1542057	1386575	1508224
1540144	1454143	1320893
1510534	1434808	1473889
1459809	1553563	1504975
1521864	1325974	1306666
1540940	1348539	1457033
1506452	1532635	1539118
1482376	1535290	1372713
1465157	1518363	1353146
1353724	1569774	1418025
1366133	1557359	1483648
1409085	1431177	1445692
1538766	1585975	1556825
1503601	1451532	1347030
1537784	1482805	1487968
1475563	1507700	1465317
1356532	1495417	1471320
1584601	1557467	1570085
1487262	1557504	1487441
1519577	1526741	1465479
1495836	1410938	1356380
1477449	1535063	1496505
1366857	1029479	1563383
1029479	1496896	1583730
1351799	1372529	1593168
1379248	1450769	1463369
1452803	1515892	1494898
1467558	1532976	1379212
1499495	1514465	1534282
1498606	1536009	1377806
1394652	1128859	1457129
1462629	1592193	1375481
1554103	1453634	1549742
1447902	1457700	1363260
1472681	1042034	1518325
1381758	1559527	1351863
1567917	1537784	1599094
1491069	1475329	1503848
1546442	1456510	1489122
1350385	1569150	1556487
1551092	1582568	1541969
1532507	1540106	1502021
1564058	1446621	1359783
1530031	1598510	1544003
1489466	1490728	1516973
1498002	1503128	1543114
1586864	1392687	1508382
1526693	1548034	1498941
1596028	1459389	1496234
1460003	1523307	1356076
1594858	1454398	1540036
1333967	1562884	1513893
1547018	1379837	1391899
1491770	1030640	1475750
1487968	1532423	1489723
1511098	1577917	1539894
1491777	1483544	1340256
1582517	1454129	1474409
1551388	1586495	1523320
1346268	1529614	1476547
1461192	1354959	1461850
1479854	1448693	1460200
1520228	1360245	1513027
1528698	1467506	1552926
1512668	1485754	1557900
1527242	1364265	1543176
1513001	1529695	1531951
1571957	1551388	1475642
1502578	1468968	1445422
1474409	1447092	1522210
1519794	1557103	1346345
1553732	1337251	1495303
1489737	1321417	1557664
1357096	1480015	1461869
1595137	1541840	1519838
1452110	1487342	1508011
1489851	1509010	1490791
1458211	1511524	1457293
1508248	1579909	1377712
1515712	1579277	1496894
1597821	1357753	1386575
1370040	1495845	1387697
1438416	1437232	1383614
1504756	1416449	1491636
1515854	1556431	1595084
1493910	1488995	1358663
1354895	1527911	1489501
1590398	1068969	1529552
1344170	1457466	1442916
1382285	1432453	1513023
1474860	1593413	1483665
1552926	1527653	1540208
1491636	1327707	1469208
1494412	1580727	1483431
1528476	1563396	1505703
1465479	1409218	1599218
1373392	1533160	1161729
1531626	1508505	1375698
1392327	1521924	1473061
1461125	1595400	1368152
1448763	1542392	1524729
1502016	1413418	1528161
1480706	1440052	1475445
1522434	1441129	1531425
1390517	1515220	1601116
1490508	1553049	1301999
1497042	1577550	1362797
1471988	1483491	1502983
1467539	1379602	1497566
1468972	1581405	1481806
1557467	1357832	1435031
1489534	1575591	1543288
1599758	1475199	1476551
1511194	1583435	1451707
1488520	1569495	1483330
1588108	1437783	1544020
1503961	1557085	1512432
1456947	1516818	1517094
1476540	1471531	1571951
1524729	1507703	1377156
1552877	1446347	1519586
1475239	1082848	1353851
1481053	1462426	1349257
1537445	1579272	1365250
1525458	1555080	1352160
1393442	1510155	1577919
1522539	1495853	1375715
1570595	1396139	1538864
1391247	1588146	1445276
1475228	1503601	1483241
1351971	1595679	1366756
1395733	1540039	1485491
1460530	1457816	1359889
1451592	1568082	1530136
1489280	1495999	1488688
1357504	1516580	1495845
1509213	1387352	1453992
1473161	1470620	1505143
1510157	1354679	1528025
1511524	1529084	1487364
1396163	1490392	1568089
1475255	1597771	1460308
1526624	1378752	1549305
1362225	1510024	1505267
1391099	1489072	1500553
1547090	1511339	1460659
1498689	1022826	1520259
1494052	1518461	1501959
1591989	1464209	1595513
1506460	1042035	1082848
1467693	1361183	1500087
1465731	1481364	1502584
1557277	1578296	1395884
1461672	1461009	1596022
1456632	1483918	1595581
1508237	1473992	1533014
1478086	1487450	1490368
1374601	1473219	1346179
1509711	1375680	1527416
1506373	1059254	1079591
1487336	1505569	1466834
1532242	1436628	1520455
1541014	1463983	1557834
1488761	1520899	1462414
1525960	1342386	1349083
1362638	1597088	1514118
1470767	1519912	1494336
1490130	1496978	1474382
1506604	1555308	1519041
1389670	1022486	1464949
1454005	1577141	1490323
1447828	1543378	1539249
1520795	1595218	1509909
1357266	1478492	1503560
1328601	1461193	1458460
1493955	1462169	1545922
1547878	1574611	1442351
1543084	1327299	1509360
1390582	1494781	1350091
1411847	1523678	1544017
1349257	1148843	1361949
1531951	1497566	1536104
1472659	1381006	1499760
1449048	1526452	1472017
1597699	1007498	1544072
1521047	1482860	1468191
1347570	1600863	1513646
1557351	1545819	1461192
1120711	1467657	1452029
1593168	1587157	1396117
1346179	1345409	1491679
1509260	1468907	1467536
1386412	1418025	1462079
1457293	1585912	1503627
1484963	1496327	1458934
1388043	1466557	1540169
1532256	1059115	1463013
1357753	1525229	1511890
1473523	1468749	1530260
1520052	1512391	1496529
1359889	1579623	1453091
1524599	1586247	1364265
1382672	1510844	1503383
1550104	1345902	1454556
1570432	1486358	1483228
1496324	1457807	1548165
1535316	1566063	1560762
1499023	1452728	1526678
1137336	1495028	1461625
1450394	1461192	1381016
1590996	1392067	1474016
1556763	1484021	1550141
1511544	1582517	1514594
1535789	1362520	1036641
1467688	1591401	1372613
1516150	1576877	1465233
1488441	1128237	1478338
1555346	1536093	1453663
1535783	1586879	1521524
1548815	1517499	1555288
1367679	1376167	1557821
1463130	1102636	1465371
1591077	1501111	1491480
1529084	1591779	1520803
1479178	1528089	1392067
1556825	1467688	1540406
1359587	1455517	1531093
1554112	1571852	1512344
1528714	1375710	1472998
1513557	1358140	1480355
1593519	1560228	1552631
1532434	1486525	1599758
1141588	1495645	1454548
1537036	1526167	1531873
1543620	1508089	1586772
1599288	1321731	1526436
1503848	1524471	1550907
1356478	1464949	1350651
1365006	1497797	1499061
1497021	1467350	1526350
1476275	1473376	1542431
1539852	1473419	1463871
1528351	1456020	1550104
1365250	1378072	1482556
1473738	1480695	1540644
1493298	1537999	1349946
1518160	1360385	1539127
1537552	1580227	1382140
1546216	1321396	1587029
1161729	1571975	1465320
1585126	1450008	1497304
1549534	1552014	1455329
1488326	1492242	1373392
1545795	1521186	1536093
1377842	1573406	1528472
1479203	1545342	1519199
1379047	1594171	1396706
1506327	1576377	1544457
1543622	1357858	1474213
1508859	1394626	1466557
1533714	1392716	1596977
1571951	1497290	1508379
1126324	1510693	1477078
1468220	1451592	1459510
1377156	1336606	1544364
1392856	1477376	1587041
1588316	1029637	1495836
1592288	1522630	1552877
1536314	1520165	1526513
1537005	1455850	1546233
1539894	1573879	1493950
1486670	1564765	1548308
1493756	1374450	1448381
1599792	1455340	1469359
1535063	1383313	1514657
1587567	1594373	1386776
1350043	1449548	1485399
1498084	1526584	1536790
1378841	1453569	1556829
1517075	1410782	1528089
1457528	1365802	1373553
1383759	1523399	1514747
1568065	1461236	1341530
1529691	1516139	1468589
1512522	1476510	1583700
1467188	1535864	1499296
1447121	1599059	1504786
1538864	1553637	1511163
1358715	1461833	1373664
1484801	1068210	1496896
1375698	1395561	1495122
1461448	1460702	1386490
1509123	1459565	1557125
1090429	1334891	1552517
1493019	1353724	1598245
1556487	1576699	1495438
1562057	1486008	1535402
1471890	1588464	1489493
1341530	1466397	1530130
1497644	1551253	1481053
1481463	1140161	1547431
1524865	1580222	1493849
1552246	1510270	1531515
1531510	1544051	1447121
1532048	1455318	1502884
1487441	1504791	1511243
1501312	1446156	1469931
1462870	1497344	1529765
1514118	1450618	1500672
1469072	1586772	1453933
1483794	1409085	1355516
1477137	1516804	1586714
1594373	1540181	1363816
1553539	1472378	1498002
1464774	1350746	1466364
1480448	1463991	1507145
1353121	1549709	1560071
1463407	1492300	1513820
1110517	1597263	1525793
1534994	1498909	1465853
1492242	1530118	1579282
1525012	1559127	1351437
1496522	1562467	1365056
1529719	1514118	1546438
1381061	1464661	1476301
1511890	1451201	1482283
1599415	1550427	1546442
1492227	1555734	1544807
1539712	1599941	1495571
1356314	1026010	1500298
1515241	1542972	1486677
1594440	1563996	1599288
1454607	1553590	1552258
1377456	1484069	1458170
1388972	1351540	1391253
1601124	1562251	1555727
1544569	1584601	1523396
1364923	1548675	1489916
1477151	1472727	1541142
1592848	1536371	1583435
1523152	1545208	1506118
1495122	1502016	1511781
1468749	1464509	1473810
1546727	1381926	1472698
1521237	1144010	1493019
1541958	1358824	1347454
1541708	1533943	1513864
1472017	1367255	1512416
1544059	1586387	1371392
1496176	1481419	1335150
1407819	1577482	1492564
1517252	1571601	1346223
1543114	1485987	1453733
1366376	1442407	1586987
1383835	1487345	1480706
1599803	1526165	1506660
1467132	1334481	1460952
1325087	1473027	1523152
1528451	1496226	1454879
1555727	1451158	1522530
1517218	1494209	1570453
1476831	1562255	1328601
1542924	1476416	1470251
1379918	1547018	1411847
1353146	1573297	1533253
1570085	1469352	1137336
1599218	1597212	1506145
1553630	1545062	1502284
1363928	1496894	1532187
1505782	1599552	1453297
1515228	1505529	1476642
1458157	1493974	1516399
1454016	1591725	1592211
1472194	1490916	1452191
1532173	1489314	1527068
1324484	1353287	1596619
1372613	1500967	1551795
1463991	1482556	1449548
1594458	1473442	1347812
1598074	1541805	1358498
1598271	1594628	1533305
1353183	1522749	1494326
1531690	1473228	1504691
1453124	1553454	1356510
1486686	1600237	1457119
1471195	1372666	1481899
1505703	1533721	1342161
1480700	1380664	1449979
1484050	1566107	1391247
1475249	1456920	1454122
1531102	1531818	1531102
1596883	1601669	1544031
1540588	1529849	1322923
1447512	1484192	1560519
1442942	1596028	1473020
1455312	1484040	1476436
1585462	1457293	1543787
1597426	1345897	1356532
1507145	1387838	1528351
1539249	1491717	1473028
1458607	1497176	1514234
1415883	1578668	1479113
1507952	1378819	1597074
1451569	1494799	1548851
1471074	1523799	1459902
1336324	1132586	1534957
1512327	1442563	1526373
1458170	1461625	1501922
1373133	1571592	1555368
1506142	1458607	1396264
1563956	1474587	1485369
1502874	1371527	1470277
1524882	1373260	1529742
1468406	1491578	1476152
1514203	1601124	1535961
1560519	1377870	1458100
1484154	1452377	1516083
1517516	1504151	1586123
1346779	1409111	1503050
1367673	1530819	1451543
1454122	1457453	1486703
1555562	1327071	1451569
1536790	1396433	1537939
1527200	1519838	1479854
1556949	1549515	1494781
1530130	1045444	1507859
1562323	1479860	1455501
1377605	1471990	1351053
1526608	1478867	1489763
1344607	1320314	1563956
1511243	1512500	1491729
1090090	1541664	1390831
1526373	1557900	1535223
1460446	1357096	1449048
1519133	1333678	1346320
1113608	1477598	1511596
1551958	1581619	1561229
1591689	1374421	1545806
1503805	1503848	1521457
1385076	1514839	1457797
1479187	1533575	1460142
1456718	1492669	1454137
1470357	1490368	1510411
1332728	1443968	1487887
1453733	1411258	1481788
1459294	1376525	1484970
1453495	1579641	1595590
1535233	1509285	1086198
1499979	1478497	1477295
1384994	1503770	1378888
1364104	1008001	1349249
1531867	1457129	1446172
1458934	1447536	1486827
1476912	1546179	1518329
1511614	1532793	1475730
1511166	1453987	1048581
1520780	1556656	1517499
1354963	1515134	1580727
1474213	1521516	1493285
1592918	1439461	1443725
1502983	1443791	1493550
1492926	1600667	1378841
1503096	1579640	1504756
1538711	1552665	1378819
1353576	1546084	1362981
1376499	1542596	1562057
1495999	1572482	1533799
1588961	1600670	1528597
1520695	1377103	1485547
1506737	1339149	1462983
1533533	1359901	1548897
1468873	1445938	1463999
1463871	1171734	1518991
1483235	1355237	1573078
1544695	1495103	1533663
1553454	1366376	1495268
1509010	1503560	1396438
1544678	1487304	1594999
1460415	1520693	1364688
1511781	1524900	1494920
1522411	1494530	1490130
1590174	1506133	1558964
1454930	1510371	1470767
1431310	1352160	1462629
1550825	1451569	1493031
1467960	1442612	1453124
1463501	1524351	1454962
1352752	1468589	1600216
1492192	1460757	1392716
1339519	1496324	1487265
1513875	1534357	1360385
1355237	1456576	1503833
1514747	1526693	1471158
1510721	1505107	1356982
1392991	1444287	1542924
1472998	1528630	1520780
1533835	1582551	1502628
1511360	1472258	1471964
1523817	1550270	1391229
1586772	1597185	1502548
1379739	1515041	1485973
1511861	1550624	1476952
1450694	1487743	1507609
1481455	1481706	1528032
1531364	1465736	1380177
1359075	1484966	1593045
1485491	1445525	1381524
1461409	1579250	1478322
1522630	1535616	1501533
1363415	1485549	1556703
1486703	1349041	1365718
1096060	1552537	1504178
1444928	1561253	1475956
1549393	1579461	1451817
1540181	1566879	1503373
1489644	1458618	1538783
1520864	1531829	1475239
1478202	1526608	1537474
1511163	1515040	1471195
1448560	1486915	1358765
1495845	1048581	1509827
1450682	1448161	1453713
1450516	1469599	1552665
1457029	1467309	1520126
1461057	1474578	1542919
1453992	1600731	1377562
1593963	1600718	1463491
1464661	1535233	1451206
1551405	1526140	1583312
1386197	1530921	1566107
1472410	1566725	1583069
1595513	1528113	1509106
1386746	1364563	1494621
1543118	1467539	1344170
1497033	1327164	1466008
1469359	1385863	1540964
[truncated: 1,067 more rows]

## Sheet: Gene Expressed in Yeast
YvsPM	YvsMM	RTvsPM									362 elements included exclusively in "List 1":	402 common elements in "List 1" and "List 2":	519 elements included exclusively in "List 2":	283 common elements in "List 2" and "List 3":	1152 common elements in "List 1", "List 2" and "List 3":	407 common elements in "List 1" and "List 3":	436 elements included exclusively in "List 3":
1555294	1350665	1513531									1006783	1008141	1019023	1006928	1017362	1016555	1000774
1548920	1453734	1535965									1008541	1012669	1066876	1022753	1026019	1028062	1011519
1542395	1477741	1488895									1073971	1031962	1070820	1033121	1027173	1065447	1016976
1504634	1555538	1590735									1100685	1035320	1084071	1065027	1041163	1080791	1030818
1513633	1459582	1515001									1106253	1053856	1087735	1073034	1043754	1080982	1032959
1360710	1565542	1582908									1109246	1066877	1103058	1147435	1045599	1085134	1038425
1456612	1369036	1456584									1117019	1079374	1122766	1172080	1055668	1089537	1051461
1483016	1538902	1444640									1123590	1088334	1150303	1177319	1058589	1095389	1066869
1528797	1590915	1510462									1125240	1090115	1160645	1179744	1064468	1137506	1067283
1535490	1590278	1394045									1170661	1118177	1171205	1307227	1064571	1158964	1068905
1522177	1501848	1480894									1172545	1153542	1292105	1322572	1074123	1159212	1087891
1471729	1519035	1473732									1177218	1161672	1294740	1324589	1087955	1165760	1095450
1518154	1519611	1323143									1311202	1305595	1303986	1329765	1095462	1317116	1105717
1493673	1171205	1365517									1320650	1321812	1312581	1330595	1099113	1323213	1113119
1556764	1540081	1503336									1323894	1325026	1316505	1334502	1105385	1323901	1128174
1547727	1395404	1584900									1324211	1332298	1320545	1335868	1110725	1324007	1130901
1332775	1294740	1535478									1333881	1336120	1322597	1338355	1128474	1326305	1142208
1512612	1464650	1442810									1338377	1340513	1327596	1345490	1129112	1326694	1166149
1526792	1458664	1494253									1338466	1343040	1330460	1348151	1130616	1330732	1172608
1530357	1377002	1533407									1346996	1343354	1330982	1351855	1134595	1332775	1176773
1520518	1528481	1473520									1349844	1348032	1332759	1352787	1137599	1334573	1291394
1497505	1484136	1495030									1350315	1350309	1336486	1354449	1138061	1335983	1306200
1495824	1476281	1518065									1354038	1350683	1337122	1354579	1142553	1336014	1314402
1510280	1538769	1485752									1354749	1351860	1338814	1355208	1152264	1340604	1321644
1454116	1479952	1396098									1355113	1355321	1339755	1355503	1162314	1342711	1321814
1393706	1358995	1453553									1356402	1355586	1341134	1359464	1164687	1348106	1323143
1484346	1392141	1303736									1358830	1356095	1342014	1365517	1290465	1348421	1324593
1533184	1564141	1514323									1359571	1360470	1343398	1370704	1303736	1349920	1324878
1394287	1354449	1459823									1360450	1363003	1343417	1373296	1320004	1351441	1325814
1534202	1508067	1474249									1362180	1365349	1346373	1374022	1320690	1352156	1325942
1562080	1563904	1347194									1363054	1367006	1346588	1374920	1321045	1354411	1326901
1542789	1453214	1505043									1364309	1368463	1347452	1375047	1321481	1355645	1328507
1554918	1511305	1511887									1365813	1370208	1349328	1375964	1321691	1358409	1329977
1497372	1378485	1500385									1365920	1370793	1349830	1377029	1321818	1358920	1332224
1456495	1521542	1522732									1366033	1371713	1350093	1378447	1322880	1360481	1334448
1537495	1511638	1471155									1366148	1374170	1350558	1378825	1323491	1361103	1336652
1521962	1495494	1495322									1369708	1375836	1350616	1379509	1323604	1361193	1337077
1340513	1532776	1590278									1370120	1378784	1350665	1380743	1324687	1362057	1338171
1325554	1470356	1501354									1370182	1382918	1350925	1387047	1325554	1362793	1338322
1478782	1505074	1533158									1373811	1383337	1354589	1387380	1326364	1363579	1339894
1534209	1555371	1386974									1375619	1384109	1355261	1388126	1326514	1363706	1344610
1377472	1516375	1465994									1376476	1387115	1355556	1388838	1326522	1363943	1344666
1458725	1506748	1536395									1376629	1387688	1356192	1390986	1329483	1364807	1344959
1454599	1377029	1489413									1377153	1387967	1356251	1391134	1330758	1365395	1345227
1446094	1446683	1532073									1377358	1390719	1357712	1391181	1331398	1365504	1345638
1452702	1483593	1485224									1377472	1392141	1358291	1391966	1332498	1365588	1345802
1509430	1379354	1538959									1377855	1392577	1358995	1392746	1333617	1366981	1347194
1468593	1348151	1550317									1378462	1393075	1360022	1395398	1335674	1369325	1348686
1480256	1517105	1508743									1380598	1393320	1360275	1395526	1339501	1370833	1349554
1100685	1474878	1509195									1384007	1393798	1360378	1407545	1339657	1371696	1349781
1526748	1551066	1493762									1384061	1407576	1360410	1407586	1341313	1372940	1351323
1551524	1378423	1501350									1385020	1415184	1362740	1408048	1342193	1373733	1351491
1582431	1541431	1538606									1385353	1416332	1363063	1409390	1342374	1375653	1353596
1466743	1537230	1593470									1385755	1417603	1365450	1416800	1343642	1380311	1356660
1513155	1465994	1509693									1389448	1417689	1365841	1434436	1344596	1384066	1356905
1478082	1510975	1525308									1389606	1430444	1366387	1435961	1346523	1385063	1358118
1508170	1340513	1475710									1389979	1431801	1367326	1442139	1347359	1385582	1358529
1601348	1541025	1517631									1391783	1436541	1367601	1442810	1347705	1389414	1362017
1474771	1506917	1599970									1392216	1439343	1368535	1444783	1347822	1389876	1362933
1541961	1539711	1390361									1393057	1442949	1368751	1444832	1347837	1391758	1366471
1590905	1472606	1455837									1393893	1446240	1369036	1446438	1348231	1392129	1368057
1506748	1487293	1474373									1394287	1446422	1369921	1446476	1348452	1393706	1368260
1601209	1461517	1530736									1396363	1446829	1371776	1446512	1349300	1394102	1368998
1479802	1546323	1526943									1409043	1447039	1374243	1446683	1349346	1395201	1370267
1456606	1542987	1489878									1409926	1448262	1374463	1447448	1350265	1396025	1375039
1451557	1595470	1538751									1410908	1448279	1374570	1447455	1350271	1411149	1375186
1462991	1552698	1477148									1430337	1448331	1375940	1448018	1350382	1432037	1375552
1600894	1524574	1513984									1433763	1448475	1377002	1448038	1350393	1434987	1375802
1488411	1536230	1491175									1434437	1448926	1377429	1448933	1351014	1435483	1376164
1085134	1529077	1506418									1436138	1449387	1378249	1449754	1351554	1436003	1376181
1477441	1561330	1535117									1441637	1451751	1378423	1451046	1351755	1437718	1377367
1466541	1363500	1482282									1445552	1452026	1378485	1451822	1352594	1438131	1378979
1531416	1470490	1472491									1446778	1452431	1381902	1453233	1353459	1438486	1379098
1434437	1443664	1481868									1447083	1452702	1386293	1453734	1355173	1439783	1380827
1508628	1478217	1488411									1448557	1452915	1386939	1455509	1355596	1442540	1382031
1468915	1355971	1541522									1450370	1452957	1387057	1456127	1355627	1442683	1382236
1512396	1552026	1592329									1450817	1453117	1387181	1456371	1355971	1443568	1382830
1494314	1501215	1410423									1452120	1453237	1388805	1456699	1357157	1444929	1383001
1583971	1557296	1509616									1454116	1453278	1389682	1457505	1357245	1445917	1384535
1321045	1539543	1475717									1454956	1453284	1389743	1457987	1357544	1446236	1386627
1544476	1477034	1526113									1456514	1453519	1389995	1458659	1357575	1446638	1386974
1488895	1472930	1481879									1456582	1453570	1391658	1459363	1359216	1446763	1388546
1496105	1548640	1459611									1456589	1453711	1394564	1459746	1359239	1448947	1389512
1492702	1360545	1499754									1456594	1454558	1395404	1462485	1359553	1448965	1390361
1465387	1491168	1551879									1456606	1454599	1407587	1463879	1360056	1453222	1392807
1479602	1473606	1522286									1457722	1454737	1416617	1465130	1360545	1453482	1394171
1512774	1487669	1479952									1458415	1455014	1417078	1465711	1360710	1453784	1396020
1506249	1473555	1454648									1458457	1455204	1433487	1465714	1361179	1454648	1396098
1336120	1474771	1500453									1458605	1455336	1433594	1465848	1361519	1455413	1407617
1177218	1522136	1480208									1458631	1456528	1441941	1466017	1362387	1455558	1407619
1524354	1525790	1535577									1459131	1458054	1442266	1467686	1363500	1455898	1408977
1485446	1498328	1449754									1459285	1458619	1442680	1468502	1364035	1456495	1410375
1460383	1355503	1526250									1459618	1458664	1443664	1469384	1364349	1456584	1410423
1369708	1463345	1458093									1459993	1458725	1444518	1470957	1364659	1456603	1411023
1366033	1511573	1051461									1460410	1458748	1445333	1471100	1365601	1456624	1411357
1456603	1358291	1445162									1460610	1458787	1445786	1471313	1365741	1456858	1411518
1538734	1487786	1499159									1460628	1459031	1446132	1472582	1365808	1457263	1411841
1473606	1525227	1596687									1461072	1459427	1446165	1476168	1366549	1457627	1416401
1517363	1518313	1444832									1462103	1459789	1446440	1476979	1366939	1458634	1429968
1485268	1444518	1528708									1463557	1459906	1446787	1477565	1367633	1459199	1431891
1464356	1459350	1542764									1463582	1460204	1448225	1477741	1367826	1459338	1432833
1500319	1492174	1510008									1464175	1460368	1448300	1477841	1368451	1459775	1434109
1375653	1549092	1465817									1464628	1460397	1449479	1477986	1368742	1459818	1435521
1524906	1526573	1444467									1464633	1460595	1450791	1478217	1368755	1460103	1437007
1534694	1510662	1537758									1465228	1461112	1451333	1479218	1369212	1460272	1439124
1459285	1537805	1495150									1465636	1461375	1451668	1479771	1369295	1460458	1441688
1463338	1510917	1348151									1465833	1461576	1451962	1479952	1369414	1460475	1442645
1591267	1587528	1496838									1466198	1462131	1452065	1480169	1370118	1460633	1443387
1390719	1531438	1434436									1466340	1462442	1452967	1480645	1370463	1460753	1443494
1483066	1599050	1511039									1466411	1463338	1452983	1481868	1371135	1460907	1444640
1538065	1523760	1522432									1466541	1463849	1453011	1482728	1372056	1461079	1445162
1458054	1501647	1496417									1467079	1464312	1453917	1483265	1372100	1461199	1445510
1524353	1537217	1466017									1468053	1464386	1453986	1483452	1372566	1461290	1446729
1521125	1476478	1510662									1468593	1464522	1453995	1483511	1373768	1461336	1446951
1466549	1553845	1515727									1468868	1464744	1454240	1483567	1374041	1461558	1447031
1547552	1355556	1517791									1468886	1464812	1454542	1483902	1374157	1461798	1447814
1486511	1599902	1502470									1469018	1466403	1454575	1486877	1374549	1462341	1449775
1541868	1599625	1545481									1469921	1466543	1454577	1487511	1375001	1463336	1451780
1594803	1535320	1550946									1470026	1468258	1454642	1487522	1375416	1463775	1451930
1459350	1541914	1545030									1470163	1468343	1454866	1487738	1375628	1463802	1453067
1504631	1507100	1476281									1470187	1468445	1455114	1487915	1376222	1463806	1453422
1511833	1490378	1483598									1470271	1468915	1455213	1489514	1376440	1463895	1453479
1535323	1548982	1489161									1471125	1468929	1456394	1489770	1376807	1463951	1453553
1502908	1521613	1460272									1471942	1470203	1456501	1490101	1376994	1464356	1453869
1528925	1466463	1539904									1472219	1470743	1456609	1490156	1377489	1464498	1454083
1383337	1466549	1486877									1473169	1471793	1457236	1490261	1377833	1464505	1454395
1172545	1322880	1503451									1473560	1472606	1457836	1490309	1378276	1464941	1455695
1378700	1506743	1455695									1473818	1473606	1458306	1490639	1378700	1465093	1455821
1349844	1579610	1497731									1474136	1473647	1458464	1490846	1379354	1465100	1455837
1459618	1360470	1536367									1474403	1474441	1458727	1491545	1379840	1466015	1455858
1379354	1540221	1366981									1474735	1474771	1458754	1493821	1380607	1466371	1456873
1417603	1532954	1557369									1474767	1475924	1458911	1495030	1380639	1466758	1457367
1541561	1542027	1473880									1475350	1476051	1459364	1495588	1381205	1466776	1457537
1582730	1601195	1113119									1476377	1476439	1459582	1495980	1381695	1467033	1457591
1491090	1509447	1496668									1477441	1476619	1459760	1496232	1381800	1467556	1458093
1464522	1527743	1366471									1477485	1476804	1459874	1496512	1382431	1467678	1458175
1565517	1538665	1503636									1477816	1477368	1460082	1496560	1382775	1468031	1459823
1393057	1160645	1464620									1477972	1478082	1460277	1496940	1382908	1468830	1460729
1519086	1536017	1345227									1478969	1478318	1460357	1497189	1383462	1468936	1460748
1461079	1526361	1461079									1478980	1478782	1460392	1497276	1383492	1469947	1461124
1563853	1466017	1526650									1479384	1478813	1460742	1497484	1384074	1470085	1461302
1501354	1512497	1338322									1480088	1479574	1461029	1497581	1384491	1470178	1461648
1451751	1506418	1526262									1480556	1480256	1461052	1500273	1384651	1471105	1461828
1526509	1350616	1469317									1480908	1480271	1461511	1500601	1385506	1471307	1462061
1490522	1535871	1469958									1481969	1480913	1461517	1501640	1385798	1471822	1462074
1503540	1598591	1469642									1483016	1481353	1461956	1501647	1386443	1475614	1462423
1492742	1483902	1326364									1483038	1481432	1462137	1501715	1386647	1475916	1463211
1514208	1588114	1474953									1483482	1481697	1462823	1502034	1387164	1476312	1463755
1536710	1519623	1533896									1484346	1483066	1463699	1502272	1387432	1476756	1464215
1476619	1481353	1534353									1485268	1484351	1463877	1502484	1387748	1476805	1464620
1109246	1455213	1376181									1485445	1484484	1463950	1503047	1388182	1477027	1465355
1447083	1481432	1592151									1485531	1485498	1464327	1504641	1388477	1477768	1465559
1557296	1590748	1446094									1486164	1485518	1464539	1505841	1389137	1478245	1465980
1556694	1451668	1358118									1486351	1485936	1464925	1505851	1389761	1479266	1466272
1588635	1515826	1508679									1486511	1486638	1465166	1506100	1391816	1479358	1466482
1567159	1472787	1479933									1487070	1486980	1465341	1506418	1392021	1479580	1466588
1570897	1458659	1544476									1487407	1487255	1465840	1506711	1392095	1480069	1466808
1494084	1386939	1325554									1487934	1487478	1465898	1506917	1392393	1480123	1466820
1585851	1393798	1556994									1488348	1487485	1465946	1507076	1392552	1481195	1466895
1463951	1520884	1469871									1488681	1487529	1465968	1507205	1393754	1481470	1466963
1526639	1512915	1597432									1488855	1487669	1466463	1507313	1393994	1481877	1467105
1454558	1350683	1446378									1488944	1488557	1466473	1507441	1394045	1482139	1467320
1551972	1526457	1506308									1489129	1488994	1467647	1507946	1394405	1482282	1468017
1325026	1507485	1439783									1490457	1489118	1467754	1508679	1394518	1483184	1468060
1454648	1516614	1477425									1490522	1489139	1467865	1510317	1395134	1483497	1468499
1452915	1491389	1567970									1491431	1489285	1468066	1510383	1395371	1483598	1468639
1458852	1553411	1511388									1491448	1489486	1468650	1510681	1396361	1484195	1469038
1491599	1523042	1321644									1491583	1490225	1468920	1510801	1407531	1484321	1469075
1385582	1536417	1456612									1491681	1490373	1469614	1511393	1407661	1485455	1469642
1505949	1518596	1471307									1492515	1490375	1470356	1511573	1407718	1487273	1469871
1550058	1487738	1463117									1493455	1490974	1471094	1512014	1410392	1487429	1470152
1525570	1541468	1511238									1493979	1491090	1471833	1512084	1410737	1488334	1470354
1376629	1492020	1519546									1494029	1491389	1472443	1512664	1411855	1488544	1470833
1477972	1539816	1513937									1494084	1491589	1472485	1512810	1412833	1489161	1470940
1597455	1598495	1372566									1494314	1492702	1472651	1513147	1413544	1489186	1471155
1535786	1330595	1501953									1494359	1493495	1472787	1513937	1414504	1489593	1471653
1504289	1536904	1391816									1494703	1494230	1472825	1514501	1431000	1489669	1472491
1588338	1529057	1556435									1494762	1494268	1472830	1514830	1431483	1490377	1472605
1573180	1586659	1454182									1496886	1494420	1472850	1515258	1432107	1490560	1473520
1526457	1502090	1510681									1497461	1494428	1472930	1515675	1432513	1490625	1473732
1525207	1550399	1006928									1497505	1494432	1473331	1515830	1432579	1490787	1474126
1553721	1508679	1566976									1498158	1494823	1473341	1516544	1432641	1490923	1474373
1541938	1473341	1376222									1498373	1494966	1473547	1516659	1433155	1492468	1475598
1513298	1595514	1494676									1498488	1495824	1473789	1517465	1433346	1492764	1475710
1545523	1362740	1516020									1499016	1496105	1473832	1518065	1435987	1493143	1476125
1393075	1590550	1354449									1499362	1496432	1474119	1518111	1436868	1493740	1476395
1479957	1542059	1523042									1499840	1496950	1474227	1518310	1437161	1494018	1477148
1458415	1508241	1493197									1500319	1497730	1474496	1518466	1439947	1494676	1477627
1470163	1518590	1494988									1500809	1498047	1474878	1518590	1440527	1494884	1478958
1391758	1459297	1568343									1500814	1498246	1475342	1519518	1440666	1495306	1479787
1453117	1590312	1520479									1501025	1499162	1476101	1521461	1442255	1495792	1480095
1532362	1522893	1509295									1501776	1499189	1476478	1521908	1442352	1496749	1480453
1500821	1488411	1538335									1502350	1499207	1476963	1522662	1442365	1497406	1480778
1347837	1497730	1494161									1502870	1499826	1477034	1523146	1442573	1498221	1481178
1596404	1456371	1523924									1503112	1499830	1477043	1524645	1442702	1498798	1481958
1479280	1538751	1389761									1503379	1499870	1477490	1524693	1443216	1498945	1482101
1483038	1448300	1555938									1503540	1499896	1477934	1524831	1444037	1499364	1483805
1370120	1510383	1534202									1503924	1500133	1478509	1524855	1444251	1499410	1483982
1465228	1504902	1384491									1504195	1500174	1478932	1525227	1444467	1499536	1484257
1499896	1337122	1349781									1504289	1500307	1478938	1525950	1444471	1499565	1485224
1453519	1387057	1563346									1504353	1500477	1479505	1526037	1444763	1499656	1485631
1526668	1479280	1496560									1504631	1500821	1479544	1526361	1445145	1499666	1485752
1489601	1453906	1374549									1504634	1501024	1479639	1527030	1445765	1500024	1486068
1486164	1463950	1469038									1505034	1501036	1479759	1527171	1445835	1500129	1486323
1501036	1452026	1524906									1505835	1501215	1480133	1527921	1446094	1500721	1486463
1519190	1524353	1473650									1505922	1501856	1480314	1529534	1446187	1500888	1486989
1519928	1307227	1580342									1506249	1501861	1481679	1531020	1446378	1501186	1487360
1590338	1536239	1555118									1507480	1502606	1481929	1531727	1446561	1501689	1488635
1058589	1466403	1510047									1507880	1502908	1482738	1531793	1446740	1501781	1488643
1360470	1585792	1526248									1508170	1503308	1483069	1531815	1447547	1502260	1489424
1320650	1516838	1506972									1508246	1504694	1483487	1531906	1448200	1503098	1489836
1500814	1514737	1464356									1508628	1504902	1483493	1533732	1448348	1503213	1490342
1380311	1543329	1465355									1509430	1505100	1484017	1535181	1448712	1503243	1490469
1458664	1590236	1540873									1509434	1505112	1484136	1535409	1449310	1503343	1492004
1538912	1472443	1407617									1510280	1505393	1484232	1535708	1449594	1503358	1492087
1099113	1483487	1532885									1510631	1505672	1484339	1536367	1449632	1503598	1492706
1566726	1490101	1463879									1510726	1506562	1484387	1537727	1449740	1503830	1493368
1544849	1459364	1509686									1511318	1506643	1484425	1538254	1449776	1504188	1493384
1468868	1563230	1565843									1511510	1506748	1484504	1538751	1450601	1504213	1493575
1551656	1481868	1374157									1512028	1507069	1484936	1539579	1451557	1504295	1493745
1470203	1479771	1368057									1512122	1507090	1485366	1539684	1451573	1505111	1493826
1540325	1561808	1370267									1512612	1508028	1485385	1540977	1451840	1505420	1493931
1552698	1500821	1451840									1512764	1508067	1485669	1541468	1452006	1505949	1494161
1487682	1452983	1505949									1512985	1509116	1485929	1541540	1452112	1506138	1495241
1474136	1522286	1497243									1513029	1509288	1486067	1542059	1452118	1506726	1495322
1455898	1451046	1585792									1513155	1509420	1486260	1542653	1452128	1507010	1496113
1464175	1458727	1459227									1513552	1510087	1486264	1542693	1452214	1507289	1496668
1553903	1525316	1487360									1513633	1510092	1486572	1543073	1452288	1508835	1497153
1530667	1585292	1506211									1513652	1510097	1486720	1543079	1452857	1509494	1497670
1514323	1445786	1470806									1514208	1510146	1486866	1544172	1452924	1509686	1498425
1354749	1476963	1546398									1514461	1511833	1487786	1544877	1452978	1509693	1498610
1526250	1568343	1465387									1515151	1512080	1487976	1547036	1453132	1509699	1498671
1481172	1453233	1528168									1515216	1512295	1488474	1547394	1453214	1509904	1498868
1456594	1495030	1476125									1515665	1512307	1488691	1547489	1453250	1510284	1499013
1351860	1542591	1353596									1515724	1512396	1488702	1547543	1453344	1510501	1499434
1500825	1395526	1568122									1517492	1512999	1488860	1547995	1453651	1510839	1499567
1095462	1441941	1505659									1518154	1514836	1489389	1548202	1453654	1510933	1499754
1464386	1501269	1593046									1518994	1515090	1489541	1548886	1453742	1511039	1499850
1540682	1531416	1552366									1519190	1515093	1490047	1549775	1453879	1511052	1500385
1466816	1442266	1548293									1519815	1515196	1490378	1550301	1453906	1511602	1500453
1542756	1592329	1513095									1520062	1515242	1490708	1550775	1454125	1512663	1503336
1365588	1490309	1544172									1521389	1515732	1491117	1551146	1454182	1512677	1503436
1378462	1553950	1554937									1521443	1516247	1491168	1551209	1455197	1513261	1503451
1518822	1471701	1519928									1522421	1516443	1491404	1552366	1455513	1513904	1503673
1134595	1545480	1511602									1522660	1516704	1491760	1553950	1455546	1514297	1504506
1442683	1434436	1380311									1522709	1517232	1491813	1553980	1455761	1514391	1504511
1505420	1416800	1388838									1523329	1517330	1492020	1554198	1455762	1515715	1505547
1491389	1537650	1503047									1523700	1517680	1492253	1554205	1455834	1516976	1505659
1457441	1529472	1549807									1523794	1518044	1492295	1554438	1455846	1517149	1506083
1449387	1519092	1532615									1524158	1518596	1492330	1554714	1455904	1517174	1506135
1516247	1490047	1359239									1524354	1518822	1492996	1555442	1456120	1517363	1506308
1539778	1480314	1453067									1525570	1519035	1493059	1557012	1456375	1517558	1506616
1473555	1526830	1489593									1525847	1519086	1493623	1559860	1456612	1518094	1506720
1490457	1526613	1569558									1526069	1519222	1493764	1562358	1456622	1519340	1506970
1324211	1524831	1505851									1526748	1519540	1493939	1563815	1456627	1519829	1506972
1538601	1523480	1594776									1527123	1519623	1494316	1564141	1456862	1520042	1508083
1468445	1539826	1505841									1527938	1520784	1494462	1565542	1456931	1520376	1508107
1547071	1460082	1459199									1528118	1520891	1494635	1567453	1456955	1520479	1508638
1504213	1499283	1525526									1528797	1521125	1494836	1568192	1456973	1520511	1508829
1535877	1523846	1457367									1529059	1521542	1495281	1569535	1457096	1520518	1509195
1564132	1490156	1506005									1529199	1521613	1496121	1582496	1457249	1521825	1509483
1538902	1384109	1381695									1529864	1521783	1496373	1582539	1457381	1522091	1509917
1412833	1489878	1456603									1530619	1522024	1496500	1585553	1457441	1522177	1510047
1552208	1552366	1368451									1530791	1522029	1497217	1586680	1457570	1522275	1510388
1494247	1502638	1471100									1530932	1522030	1497231	1589202	1457928	1522447	1510462
1538346	1541961	1518310									1531023	1522478	1497946	1589859	1457964	1522644	1511388
1523130	1417689	1330595									1532362	1522556	1498328	1590178	1458022	1522738	1511887
1066877	1451840	1534235									1532545	1522655	1498493	1590278	1458302	1522990	1511994
1324687	1494836	1469749									1532631	1523561	1498920	1592329	1458539	1523127	1513266
1511052	1491730	1371696									1533184	1523934	1499258	1592466	1458814	1523848	1513372
1350265	1522998	1538254									1533581	1523940	1499526	1593046	1458852	1523928	1513521
1117019	1494432	1504044									1533864	1524353	1499609	1594222	1459025	1524577	1513887
1043754	1550775	1536497									1534261	1524444	1500594	1594519	1459227	1524906	1513984
1497041	1356251	1550851									1534393	1524574	1501272	1594973	1459297	1525207	1514145
1489413	1481607	1599527									1534892	1525016	1501848	1595344	1459350	1525308	1514880
1395201	1511477	1446476									1534908	1525142	1502039	1598001	1459411	1525421	1514895
1073971	1497041	1129112									1535786	1525393	1502090	1598495	1459429	1526668	1516037
1524040	1453917	1481178									1535886	1526022	1502144	1599050	1459498	1526841	1516978
1371135	1526062	1582767									1536877	1526068	1503067	1599625	1459611	1527577	1517791
1510726	1590905	1536058									1537232	1526639	1503192	1600178	1459886	1528708	1517945
1535871	1371776	1596676									1538065	1527738	1503235	1600620	1460370	1528739	1518235
1466198	1499526	1461840									1538546	1527875	1503431	1601118	1460383	1528747	1519231
1497461	1455834	1471537									1538633	1527882	1504770	1601195	1460621	1529143	1519613
1368463	1515196	1466758									1538935	1527913	1504888		1461561	1529426	1519850
1553719	1354579	1492209									1539479	1528823	1505074		1461840	1529531	1521722
1455336	1554061	1513889									1539778	1529472	1505476		1461935	1529855	1521837
1546030	1006928	1329765									1539792	1529591	1506743		1462183	1530357	1522432
1520891	1378825	1495297									1540366	1529859	1507100		1462617	1530582	1522510
1528747	1496694	1534463									1540403	1530220	1507485		1462738	1530891	1522721
1505835	1489770	1546030									1540454	1530667	1508657		1462919	1531250	1522732
1462131	1557156	1506138									1540682	1531416	1509366		1462957	1531371	1522854
1513552	1528353	1469075									1540822	1531721	1509447		1462991	1533727	1523377
1555854	1513688	1577111									1541548	1531798	1509480		1463006	1533794	1523924
1396361	1521313	1455858									1541868	1531888	1510037		1463022	1534202	1525065
1463557	1587720	1474944									1541952	1532147	1510551		1463117	1534289	1525371
1531359	1487100	1495588									1542223	1532163	1510684		1463208	1534694	1525526
1550399	1535877	1502487									1542395	1532879	1510745		1463224	1535025	1526262
1476312	1480256	1522990									1542789	1532895	1510917		1463345	1535323	1526430
1480271	1513955	1464498									1543817	1532954	1511046		1463347	1535416	1526650
1545481	1510008	1382830									1545967	1533801	1511628		1463385	1535478	1526861
1510662	1479505	1432579									1546569	1534004	1511638		1463463	1535568	1526943
1448475	1494823	1538758									1546937	1534524	1512113		1463790	1535577	1528168
1008541	1542774	1520276									1547048	1534771	1512229		1464200	1535679	1528188
1537805	1517342	1474781									1548496	1535320	1512287		1464326	1536058	1528281
1541103	1510681	1536721									1548920	1536417	1512393		1464352	1536541	1528379
1364807	1343398	1447814									1549867	1536423	1512792		1464650	1536931	1528724
1551875	1503192	1466031									1550402	1536710	1512915		1465088	1537172	1529022
1526973	1585553	1358920									1550833	1537230	1513158		1465255	1537364	1530736
1489186	1466816	1552459									1551425	1537376	1513253		1465344	1537758	1531886
1517235	1592638	1536057									1551524	1537699	1513473		1465353	1537763	1532205
1601362	1588714	1460748									1551538	1538148	1513688		1465387	1538086	1532615
1478318	1496950	1516037									1551656	1538212	1514282		1465817	1538335	1532810
1538633	1452288	1453869									1551875	1538215	1514346		1465994	1539234	1532885
1505395	1487529	1522452									1551972	1538346	1515344		1466031	1539496	1533158
1489813	1480645	1502484									1552208	1538476	1515605		1466041	1539565	1533482
1545030	1554544	1486463									1552528	1538734	1515826		1466470	1539587	1533665
1492174	1546254	1499013									1554798	1538769	1516015		1466527	1539914	1534064
1536721	1510080	1377029									1554843	1538869	1516375		1466549	1540227	1534065
1387688	1513473	1525238									1554918	1538902	1516383		1466597	1540839	1534235
1496886	1548886	1495508									1554927	1538912	1516451		1466743	1541103	1535285
1317116	1453570	1467686									1555294	1539312	1516614		1466785	1541114	1535314
1537650	1323491	1544319									1555854	1539719	1516720		1466816	1541465	1535422
1548593	1472850	1538895									1555884	1539724	1516838		1466826	1541938	1535465
1593020	1557293	1380639									1556444	1539789	1517105		1466878	1542322	1535868
1459427	1486181	1487915									1556499	1539816	1517238		1467081	1542756	1535965
1522709	1365450	1517363									1556764	1540081	1517342		1467102	1542796	1536057
1597496	1601118	1481253									1556822	1540477	1517356		1467115	1544182	1536480
1566395	1517258	1466820									1557426	1540848	1518313		1467119	1544476	1536497
1532631	1493821	1514830									1559769	1541025	1518350		1467142	1544659	1536522
1539234	1341134	1359216									1559980	1541342	1519044		1467323	1544849	1536658
1599902	1527731	1483805									1560760	1541431	1519847		1467472	1545195	1536707
1588339	1446132	1500825									1562080	1541565	1520034		1467478	1545523	1536862
1533864	1468087	1474126									1563426	1541735	1520466		1467494	1546064	1537116
1480908	1365517	1452978									1563907	1542027	1520525		1467502	1546961	1537332
1453906	1496940	1526861									1564132	1542413	1520529		1467507	1547402	1537826
1372940	1551283	1531906									1564493	1542591	1520670		1467549	1547552	1538140
1366148	1510097	1456495									1565517	1543401	1520765		1467740	1547893	1538166
1556822	1474227	1525227									1565625	1544755	1520813		1468027	1548523	1538893
1464312	1596060	1500009									1565926	1544839	1520824		1468050	1549036	1538959
1531745	1475924	1375186									1566519	1545524	1520832		1468087	1549569	1539147
1363579	1556669	1589367									1579035	1546177	1520884		1468507	1549816	1539204
1482282	1565747	1451780									1581495	1547040	1521023		1468674	1549940	1539833
1453214	1586680	1537805									1582730	1547199	1521024		1468924	1550023	1540873
1487776	1480133	1501186									1584118	1547219	1521196		1468942	1550041	1540880
1564493	1531533	1541540									1584864	1548301	1521209		1468947	1550311	1540993
1452120	1538346	1540227									1585522	1549701	1521315		1469013	1550389	1541364
1530932	1524651	1491545									1585888	1549732	1521510		1469315	1550851	1541522
1515151	1534771	1524442									1586768	1550058	1521794		1469317	1550946	1542247
1546569	1485583	1483787									1586774	1550399	1522014		1469542	1554937	1542764
1382918	1454737	1490469									1586848	1551529	1522136		1469749	1555118	1542794
1550023	1524444	1016555									1588635	1551863	1522761		1469848	1555493	1543070
1540221	1593046	1453784									1588698	1552100	1522893		1469863	1555759	1543219
1389606	1590178	1557296									1589649	1552564	1523168		1469926	1556694	1543227
1565747	1568349	1470940									1591267	1552589	1523372		1469958	1556695	1543933
1512714	1538869	1587591									1592058	1552708	1523405		1470073	1557283	1544106
1541548	1555442	1384074									1594522	1552914	1523480		1470195	1557395	1545200
1539792	1482738	1507946									1595698	1553370	1523846		1470378	1557680	1545290
1505034	1461029	1323491									1597478	1553721	1524253		1470490	1557921	1546398
1360545	1453344	1360545									1597496	1553861	1524744		1470801	1559481	1546744
1550389	1601348	1493384									1598942	1554284	1525200		1470806	1559584	1546923
1463849	1531697	1487776									1600894	1554544	1525273		1470825	1561927	1547235
1540227	1461576	1497041									1601333	1554832	1525316		1471230	1561991	1547561
1514836	1532369	1525295										1555551	1525430		1471474	1563235	1548028
1522286	1458911	1485471										1556653	1525790		1471537	1563346	1548068
1450817	1459760	1487273										1557120	1525833		1471652	1563853	1548630
1358409	1459427	1482688										1557166	1526118		1471694	1565792	1548664
1504362	1534524	1346523										1557265	1526423		1471701	1566726	1549791
1385020	1566886	1463802										1557630	1526557		1471729	1566976	1549807
1466597	1467115	1541561										1560124	1526573		1472085	1567159	1550273
1499016	1074123	1465130										1560289	1527624		1472588	1568132	1550718
1532954	1330460	1369414										1561039	1527813		1472596	1573180	1551605
1538758	1506605	1502597										1562197	1528481		1472924	1575428	1551722
1461576	1540612	1541103										1566105	1528484		1473055	1575802	1551896
1509434	1446165	1484409										1566336	1529057		1473174	1577111	1551944
1595698	1079374	1382431										1578572	1529062		1473464	1579918	1552264
1598008	1548293	1508107										1579610	1529077		1473476	1580342	1553685
1595738	1095462	1515838										1580255	1529528		1473555	1582667	1554895
1452118	1512664	1468027										1582431	1530351		1473650	1583950	1554912
1534892	1502039	1490156										1583971	1530379		1473711	1584571	1555171
1511510	1538091	1520475										1584109	1531186		1473869	1585857	1555938
1519035	1540977	1362933										1585418	1531244		1473880	1586808	1556435
1510080	1600988	1477877										1585612	1531438		1473979	1587537	1556665
1563925	1509616	1465100										1586271	1531697		1474160	1587591	1556679
1451840	1446787	1548593										1586659	1532428		1474249	1588338	1556840
1506005	1518350	1455761										1587010	1534247		1474747	1590338	1558819
1597432	1536220	1542059										1588339	1535854		1474755	1593020	1561440
1515093	1553434	1480919										1589857	1536017		1474781	1593123	1562135
1600344	1454642	1485446										1590905	1536098		1474846	1593957	1563177
1528708	1534247	1467102										1590915	1536230		1474872	1594339	1563415
1515216	1463879	1317116										1593475	1536239		1474944	1594672	1563606
1542322	1370463	1522407										1594502	1536670		1474946	1594967	1564724
1466403	1500307	1480169										1595114	1536904		1474953	1595301	1565843
1360450	1483452	1519850										1595325	1537217		1474962	1596676	1566001
1541431	1534483	1505520										1595738	1537668		1475336	1596687	1566677
1586271	1482725	1592584										1596404	1537869		1475623	1597839	1567261
1515454	1528940	1504506										1596776	1538091		1475717	1597902	1567280
1486335	1460621	1466785										1598342	1538442		1475943	1598008	1567473
1446422	1506211	1545195										1599537	1538665		1475999	1598220	1567818
1016555	1458619	1527731										1599902	1539491		1476281	1599171	1569326
1517631	1513147	1468060										1600344	1539543		1476298	1599213	1570019
1499362	1566381	1332775										1600367	1539826		1476484	1599721	1570074
1528739	1513937	1534694										1601272	1540148		1476546	1599753	1570876
1538546	1592410	1506083											1540408		1476808	1599801	1573454
1459199	1502487	1388126											1540612		1476866	1600413	1576427
1535025	1493939	1483511											1540953		1476892	1600607	1579075
1461112	1496792	1453132											1541022		1476931	1601209	1579495
1509686	1500133	1492174											1541311		1476934	1601362	1580489
1476546	1518466	1594222											1541914		1477069		1580771
1585792	1348452	1360481											1541963		1477264		1583042
1547052	1538895	1597111											1542231		1477391		1583949
1469921	1553721	1480453											1542357		1477404		1586208
1355596	1457836	1375964											1542774		1477425		1586411
1469317	1526118	1506720											1543209		1477875		1588237
1365349	1595325	1468639											1544229		1477877		1589367
1489486	1531727	1506100											1544802		1477959		1589881
1460410	1510285	1549803											1544817		1478363		1590735
1471694	1118177	1513904											1545045		1478733		1591235
1378784	1559754	1355645											1545462		1478759		1592151
1391783	1467494	1523903											1545480		1479044		1592234
1442949	1486572	1548630											1545777		1479246		1592347
1551879	1547989	1528379											1545916		1479280		1592584
1474403	1320004	1537332											1546323		1479391		1593051
1482688	1488474	1345638											1546553		1479417		1593722
1512122	1350925	1592234											1546953		1479521		1593805
1453784	1566395	1466588											1547187		1479543		1594173
1502350	1330982	1540825											1547437		1479602		1594666
1555118	1520529	1548886											1547882		1479670		1594770
1593475	1454866	1353459											1547989		1479802		1594776
1528940	1460742	1434987											1548310		1479835		1595395
1522024	1568192	1551605											1548536		1479933		1596732
1461558	1540187	1524693											1548640		1479957		1597077
1439343	1147435	1503313											1548844		1479959		1597832
1125240	1521209	1533700											1548906		1479982		1599970
1494320	1367326	1553980											1548977		1479994		1600016
1497653	1555226	1396361											1548982		1480064		1600903
1509693	1325554	1471230											1549092		1480140		1601442
1525847	1557120	1543933											1549279		1480201
1373811	1539904	1439124											1549377		1480208
1471822	1491597	1387748											1549930		1480592
1536423	1597455	1515258											1550754		1480797
1503379	1484818	1491188											1551066		1480879
1350315	1548536	1548664											1551283		1480894
1493670	1499207	1535314											1551531		1480919
1392141	1389743	1595395											1551771		1481061
1487255	1579262	1500273											1552096		1481123
1533581	1476979	1499042											1552269		1481172
1489285	1543432	1566677											1552434		1481205
1456582	1485929	1539579											1553220		1481253
1477027	1511393	1345802											1553301		1481539
1527913	1341313	1455413											1553411		1481607
1482142	1555852	1492344											1553434		1481879
1467102	1474119	1541468											1553541		1481933
1323901	1467647	1601348											1554061		1482072
1531533	1446187	1468942											1555226		1482099
1491681	1448926	1456371											1555371		1482142
1513955	1512912	1593020											1555440		1482372
1442255	1371713	1545200											1555503		1482594
1538869	1516720	1446951											1555538		1482688
1509116	1444471	1529143											1557002		1482725
1356095	1534004	1537763											1557156		1482791
1453237	1489285	1567261											1557168		1483176
1540081	1478932	1324593											1557234		1483593
1523329	1597432	1487511											1557293		1483768
1501186	1590826	1457537											1558683		1483776
1446236	1551349	1459338											1559754		1483787
1026019	1435987	1446683											1561330		1484409
1541728	1474946	1466963											1561494		1484432
1510394	1561494	1512179											1562469		1484566
1471125	1489413	1546649											1563230		1484652
1491448	1492330	1533482											1563904		1484683
1529059	1465898	1481933											1565065		1484737
1448947	1497484	1432641											1565860		1484739
1463582	1496121	1475916											1566026		1484816
1471701	1442352	1530357											1566381		1484818
1492288	1523903	1440666											1567237		1485059
1533896	1520813	1507673											1568349		1485344
1593957	1496512	1448038											1569913		1485446
1527738	1465341	1489299											1572436		1485471
1463806	1547169	1515675											1573939		1485583
1481432	1459874	1481607											1576503		1485656
1491617	1516704	1549036											1579216		1486181
1505043	1507076	1451930											1580282		1486335
1525393	1472825	1483982											1582344		1486552
1535320	1467686	1555442											1582507		1486926
1504195	1516544	1517945											1583426		1486952
1371713	1472582	1516031											1583735		1487100
1551529	1433594	1531865											1585292		1487293
1510579	1451333	1479957											1586172		1487335
1479933	1469958	1483452											1586688		1487419
1560124	1493690	1509580											1586713		1487422
1350309	1387047	1362017											1587720		1487426
1459338	1453519	1467502											1588114		1487682
1505393	1503636	1348686											1588714		1487776
1599537	1507205	1456873											1589198		1488411
1537230	1432641	1501781											1589490		1488695
1343354	1407718	1535323											1590236		1488895
1361103	1595114	1545304											1590312		1489076
1507880	1546840	1498052											1590550		1489299
1594522	1551529	1172608											1590748		1489401
1367006	1532428	1556564											1590826		1489413
1538476	1505476	1539204											1590953		1489441
1447039	1455846	1503673											1591057		1489483
1483593	1516247	1525438											1591078		1489601
1453284	1332759	1497484											1592381		1489712
1522452	1464925	1332224											1592410		1489813
1469018	1465344	1588338											1592638		1489857
1387115	1529859	1045599											1594670		1489878
1393994	1363003	1496877											1595174		1490711
1595301	1515675	1358409											1595470		1490714
1496694	1509553	1510547											1595514		1491175
1496950	1449479	1542796											1596060		1491188
1375619	1536670	1416401											1596279		1491206
1481253	1458725	1475598											1596964		1491223
1499666	1478813	1456955											1597305		1491420
1486181	1490974	1458659											1598065		1491466
1460753	1501272	1547893											1598591		1491597
1534351	1463338	1498713											1599055		1491599
1482072	1502077	1543410											1600630		1491617
1493455	1545030	1484195											1601191		1491692
1525308	1474872	1489424													1491730
1494823	1548844	1540977													1491790
1526248	1486264	1506917													1492174
1464744	1546030	1460475													1492209
1553861	1547187	1462485													1492222
1588698	1343354	1533414													1492288
1472606	1392746	1495241													1492344
1513579	1526509	1335868													1492451
1523940	1491813	1506031													1492609
1516020	1526423	1467678													1492716
1472924	1510745	1459297													1492742
1481697	1557012	1567473													1492890
1519623	1495508	1535422													1492904
1526068	1502080	1372940													1493197
1517492	1514830	1575802													1493566
1470187	1541460	1513887													1493645
1487407	1493623	1484566													1493670
1436541	1484739	1476979													1493673
1490974	1505851	1467119													1493690
1515732	1457505	1152264													1493695
1511318	1360275	1469542													1493762
1359216	1512774	1373768													1494146
1568343	1490639	1591235													1494247
1596676	1303736	1491223													1494253
1599213	1448225	1411357													1494320
1535117	1172080	1516659													1494364
1494988	1547052	1517350													1494501
1551863	1522407	1390986													1494814
1520494	1544770	1557012													1494830
1523934	1456862	1490101													1494833
1592058	1476168	1510394													1494988
1587010	1596585	1599721													1495150
1387967	1461956	1489186													1495271
1460628	1416617	1478217													1495297
1527938	1479521	1540946													1495477
1549036	1485669	1407531													1495494
1541735	1550754	1498798													1495508
1543329	1500477	1498868													1495543
1584571	1586172	1442255													1496003
1321818	1468343	1463347													1496215
1482725	1534351	1480592													1496228
1409926	1487915	1518466													1496393
1456862	1359216	1329977													1496417
1593123	1485446	1532554													1496428
1521108	1537668	1519792													1496502
1459993	1391134	1467142													1496694
1464628	1502144	1452288													1496706
1394102	1507078	1394171													1496716
1519540	1485344	1512810													1496792
1563619	1487976	1519910													1496838
1539914	1431801	1493645													1496877
1532073	1560289	1549737													1496962
1516976	1395398	1524147													1496991
1453278	1486877	1544182													1497041
1552528	1509442	1377367													1497047
1460272	1525273	1336652													1497243
1510631	1458814	1496940													1497372
1407531	1453986	1564724													1497476
1460475	1374920	1460729													1497653
1512999	1448262	1392746													1497731
1542027	1383337	1498940													1497897
1540825	1487511	1506435													1497996
1481195	1366387	1494501													1498051
1549732	1492742	1547561													1498052
1453344	1500825	1481470													1498214
1161672	1458787	1564141													1498225
1383492	1557002	1542247													1498356
1471942	1536851	1467549													1498434
1460610	1553541	1589881													1498659
1356402	1331398	1502080													1498713
1483598	1586713	1497047													1498873
1355645	1322597	1475999													1498893
1527123	1529062	1497476													1498904
1499159	1456609	1314402													1498940
1510008	1454542	1459429													1498959
1534483	1463699	1516976													1498967
1497476	1498920	1514880													1499042
1598342	1538775	1539098													1499159
1446240	1164687	1460633													1499204
1554843	1459429	1459775													1499283
1528511	1568382	1517174													1499290
1540477	1343417	1459746													1499404
1485518	1366549	1513521													1499522
1448557	1519847	1494320													1499874
1490923	1521196	1444783													1499881
1479384	1525610	1547052													1500009
1554927	1544172	1444929													1500614
1384061	1516015	1476756													1500804
1539719	1532073	1522510													1500825
1556645	1545777	1543930													1500876
1541565	1519635	1463006													1501269
1450370	1594519	1138061													1501350
1537172	1480797	1526973													1501354
1359239	1476439	1457591													1501606
1449632	1600630	1479266													1501795
1566886	1477565	1539147													1501814
1372056	1448038	1543227													1501822
1458605	1455762	1512084													1501953
1333881	1476619	1493368													1502077
1522655	1563925	1583042													1502080
1526062	1394564	1503358													1502240
1525421	1512084	1373296													1502470
1532545	1527030	1467320													1502487
1346996	1586688	1531020													1502493
1483482	1520466	1355596													1502495
1475717	1552100	1544877													1502597
1468924	1525295	1528724													1502638
1477959	1499609	1522738													1502892
1474953	1521440	1142208													1503140
1522421	1495543	1537826													1503223
1474946	1567547	1554895													1503237
1123590	1387115	1553685													1503313
1487070	1570897	1356905													1503636
1500133	1468027	1463336													1503808
1504365	1440527	1510284													1503820
1491790	1467142	1562135													1504044
1508067	1463463	1516978													1504248
1460458	1452957	1492087													1504297
1595325	1465968	1479959													1504362
1456931	1476931	1535708													1504365
1495297	1466473	1531069													1504649
1533378	1582431	1492222													1504753
1393798	1600344	1477741													1505043
1531888	1458464	1538893													1505395
1523794	1598065	1599753													1505520
1541025	1084071	1526062													1505943
1355586	1090115	1470378													1506005
1457263	1483511	1328507													1506031
1469863	1442680	1550273													1506036
1541952	1538050	1492004													1506159
1364035	1551531	1522854													1506211
1505112	1462485	1000774													1506435
1464650	1544839	1475623													1506480
1512295	1552914	1544106													1506566
1350271	1539491	1479246													1506605
1485455	1526973	1349300													1506787
1527875	1417603	1522721													1506886
1382775	1548977	1508638													1506907
1484566	1444783	1488643													1507061
1452431	1539820	1531727													1507078
1498713	1527913	1536220													1507157
1585418	1595344	1515208													1507622
1544755	1348032	1531815													1507673
1535886	1521108	1322572													1507692
1311202	1361179	1351491													1507776
1586768	1588874	1016976													1507792
1554832	1589857	1526283													1507851
1477877	1552403	1454083													1508104
1509408	1553073	1471313													1508241
1522091	1364349	1490923													1508401
1548293	1498434	1552573													1508412
1586050	1378276	1595301													1508743
1516443	1540674	1522662													1509223
1521260	1446438	1514391													1509277
1480913	1456699	1498893													1509295
1522275	1563619	1599171													1509408
1496706	1550058	1545523													1509426
1488557	1473979	1550023													1509442
1600988	1475336	1526037													1509553
1485531	1515657	1497189													1509580
1560289	1564720	1473979													1509616
1501350	1446422	1585857													1509866
1384109	1374549	1456973													1509896
1500307	1523405	1487682													1510008
1465833	1532295	1508104													1510054
1507480	1512396	1521461													1510060
1504353	1503047	1462074													1510080
1512497	1551499	1470825													1510285
1457722	1468066	1496792													1510394
1365920	1389995	1128474													1510406
1458619	1547727	1368998													1510547
1556444	1537987	1508401													1510579
1323894	1363063	1491206													1510662
1503924	1551422	1536931													1510732
1499283	1415184	1556665													1510958
1358920	1538476	1095389													1510975
1494253	1484425	1550775													1511238
1543223	1041163	1482725													1511305
1484484	1475999	1528747													1511477
1568132	1582767	1535465													1511775
1540403	1393075	1516544													1512179
1557265	1519518	1526019													1512497
1547040	1506643	1466371													1512587
1507157	1494428	1482372													1512714
1393320	1450601	1483567													1512774
1407576	1492295	1058589													1512912
1465344	1350393	1550041													1513095
1474944	1481539	1545099													1513298
1415184	1386293	1536480													1513364
1459789	1536395	1471694													1513485
1531721	1482072	1507157													1513498
1393893	1580255	1590000													1513531
1375836	1562843	1480095													1513565
1538606	1553220	1529022													1513577
1008141	1524744	1461648													1513579
1555759	1529528	1507078													1513831
1462103	1374243	1548062													1513889
1525438	1066876	1509553													1513955
1518596	1519792	1540880													1514170
1512307	1502470	1519613													1514229
1519546	1348231	1544868													1514323
1469315	1555503	1556695													1514737
1539479	1540477	1490787													1515001
1532165	1482728	1567818													1515096
1501776	1479044	1504365													1515208
1467079	1519939	1592466													1515454
1541342	1491404	1522998													1515547
1551538	1600178	1480064													1515548
1597478	1502034	1499434													1515657
1515813	1582496	1594519													1515727
1563907	1599530	1489441													1515813
1520784	1520824	1372056													1515838
1432641	1374041	1535181													1516020
1326305	1580282	1538436													1516031
1523700	1498940	1370704													1516197
1490787	1449776	1530634													1516201
1463895	1335674	1521837													1516317
1446763	1375940	1446236													1516408
1494268	1375964	1556669													1516468
1495306	1451751	1347359													1517029
1589857	1351855	1511994													1517051
1535577	1471729	1507692													1517144
1595114	1541540	1463345													1517235
1346523	1530379	1504641													1517258
1504248	1601191	1480778													1517350
1323213	1487522	1555171													1517473
1506031	1547437	1460621													1517486
1460204	1471094	1522002													1517631
1501025	1539579	1539496													1518142
1481607	1360378	1531886													1518401
1544870	1471537	1522644													1518576
1499364	1515830	1350382													1519048
1564720	1411855	1518235													1519083
1303736	1531815	1533665													1519092
1470806	1507313	1507061													1519250
1384007	1598342	1513579													1519253
1502470	1522761	1492764													1519422
1559769	1485385	1348452													1519546
1541114	1383492	1540325													1519611
1471793	1558683	1540221													1519627
1469749	1508401	1598001													1519635
1486552	1035320	1516408													1519792
1555551	1484936	1465711													1519910
1549867	1465387	1537364													1519928
1519340	1476546	1598495													1519939
1468929	1496500	1501647													1519988
1335674	1530017	1363500													1520014
1523903	1477986	1474747													1520146
1509223	1461112	1498967													1520149
1504044	1566336	1517258													1520276
1492209	1537483	1470152													1520332
1350683	1524645	1453344													1520475
1536723	1012669	1461828													1520494
1498052	1488702	1457987													1520573
1485471	1542472	1595344													1521108
1498246	1524693	1503243													1521260
1534771	1580646	1357575													1521309
1497406	1493673	1524855													1521313
1539496	1554438	1434109													1521440
1488681	1510146	1601442													1521801
1542796	1548310	1364035													1521869
1506138	1453237	1527131													1521876
1492344	1550301	1467507													1521962
1507069	1339657	1551809													1522002
1460633	1469848	1456627													1522140
1551615	1540825	1462957													1522286
1508028	1070820	1095462													1522407
1153542	1507061	1448947													1522452
1352156	1530667	1512774													1522466
1517486	1560124	1515813													1522848
1491583	1476051	1537172													1522972
1469848	1478318	1483184													1522998
1489161	1484504	1456622													1523042
1376476	1494316	1482072													1523061
1527743	1554682	1486989													1523130
1549803	1541022	1361193													1523183
1323491	1502606	1499567													1523283
1532369	1496962	1518111													1523671
1566519	1453278	1464352													1523760
1465994	1346588	1557921													1523903
1557921	1407661	1504295													1524040
1458787	1565065	1510388													1524147
1490560	1456612	1522091													1524153
1546913	1486866	1130901													1524435
1321812	1476298	1162314													1524442
1454182	1477043	1495543													1524625
1547048	1552269	1470085													1524636
1552100	1596964	1463895													1524651
1494029	1520034	1544870													1524721
1480919	1350309	1375039													1525238
1364309	1501856	1539833													1525295
1539816	1491466	1546923													1525309
1410737	1518142	1476168													1525312
1545756	1450791	1459498													1525438
1502487	1548062	1588874													1525494
1557426	1591501	1533732													1525601
1478813	1546953	1463211													1525610
1507010	1336486	1541364													1525626
1524636	1494320	1523377													1525635
1494432	1456375	1550718													1525655
1552564	1499896	1375628													1525756
1392216	1531020	1344610													1525911
1469947	1481205	1529474													1526019
1596687	1497276	1504362													1526062
1446778	1321818	1464215													1526113
1152264	1456127	1526668													1526248
1546754	1488860	1504213													1526250
1462442	1535409	1554714													1526283
1491188	1354589	1375552													1526457
1515090	1517680	1493695													1526509
1444929	1453742	1432833													1526613
1453132	1367826	1599050													1526792
1392552	1447039	1474755													1526830
1492222	1066877	1393706													1526973
1584359	1457096	1445145													1527131
1361193	1539724	1535416													1527731
1498798	1592603	1512912													1527743
1362057	1531186	1453214													1528186
1513531	1500614	1526457													1528353
1533700	1531244	1483497													1528511
1506562	1536098	1541961													1528536
1513904	1549377	1589202													1528541
1478980	1510092	1552664													1528706
1503243	1459498	1329483													1528826
1526830	1464386	1488635													1528925
1340604	1387748	1455904													1528940
1567970	1501715	1480123													1529474
1467549	1507069	1509699													1529810
1500809	1542231	1487429													1529853
1468087	1456931	1357544													1530017
1478363	1552096	1533987													1530347
1509616	1584109	1340604													1530361
1556695	1464744	1593123													1530364
1118177	1346373	1525371													1530576
1532147	1454577	1535810													1530634
1380598	1510037	1565542													1530662
1597902	1530351	1416800													1530888
1524147	1460357	1529855													1531069
1546840	1491589	1391758													1531238
1372566	1547995	1555759													1531261
1533801	1496877	1499410													1531359
1487669	1477490	1396025													1531533
1521783	1533700	1584359													1531545
1568087	1347822	1509223													1531600
1089537	1469863	1394518													1531745
1387164	1532355	1443494													1531804
1491431	1587010	1541938													1531865
1473818	1496428	1384066													1532073
1512179	1521461	1437007													1532156
1545967	1526557	1179744													1532165
1462617	1493059	1536522													1532295
1129112	1527624	1526430													1532355
1474249	1525655	1480797													1532369
1474441	1510579	1518576													1532554
1539098	1417078	1535409													1532776
1518142	1365841	1592347													1532779
1512764	1470825	1594666													1533016
1517350	1474496	1496113													1533226
1497047	1527813	1593722													1533310
1535478	1497946	1547995													1533378
1555884	1452431	1502034													1533407
1470073	1390986	1557680													1533414
1522478	1517465	1558819													1533555
1510146	1598614	1477875													1533700
1465817	1586050	1507776													1533771
1503140	1515838	1383492													1533872
1512912	1473547	1599801													1533896
1499826	1055668	1482791													1533977
1459031	1471793	1386443													1533987
1532163	1536516	1530582													1534011
1464633	1518044	1472582													1534209
1534908	1479759	1391181													1534344
1549701	1554205	1594973													1534351
1501781	1516659	1336014													1534353
1556669	1553370	1395398													1534463
1363943	1452118	1551944													1534483
1477425	1497189	1540193													1534495
1320004	1329765	1507010													1535026
1503358	1497581	1463951													1535117
1534261	1513579	1563312													1535140
1579262	1589202	1493690													1535490
1486351	1494635	1507076													1535738
1470271	1547569	1536707													1535810
1365813	1545916	1524636													1535848
1521613	1540946	1531359													1535871
1498967	1471100	1524831													1535877
1512080	1525142	1369295													1535893
1599753	1455014	1484257													1536220
1361179	1500174	1364807													1536351
1596274	1500273	1596732													1536395
1480592	1359464	1556840													1536429
1533407	1465946	1479521													1536516
1568122	1534209	1334448													1536721
1551809	1389682	1456862													1536723
1528118	1552520	1134595													1536851
1479266	1496105	1599625													1537372
1586774	1498959	1536658													1537405
1500174	1388838	1597879													1537483
1536395	1558884	1011519													1537486
1357575	1387967	1521108													1537495
1523127	1552664	1492742													1537650
1530662	1179744	1600525													1537805
1158964	1396361	1517235													1537987
1543830	1525833	1563815													1538050
1540946	1467502	1490639													1538436
1473560	1374463	1463755													1538601
1458457	1321045	1500721													1538606
1382431	1583735	1478363													1538758
1484409	1465840	1554198													1538775
1511477	1387432	1326522													1538881
1519988	1505841	1515096													1538895
1476804	1586271	1535285													1539098
1549940	1532165	1447448													1539225
1496962	1530634	1506886													1539476
1501606	1444832	1483593													1539711
1475350	1537727	1395134													1539820
1503343	1520670	1026019													1539904
1506036	1357712	1490714													1540044
1547199	1473832	1473174													1540059
1526613	1480913	1468499													1540187
1459131	1494420	1477404													1540193
1466785	1516451	1493673													1540221
1326694	1487419	1513147													1540325
1335983	1485936	1510732													1540674
1355321	1499826	1464941													1540798
1563346	1387688	1513266													1540825
1503808	1479957	1495792													1540946
1467119	1485059	1554912													1541162
1499204	1582507	1482728													1541314
1526113	1512999	1095450													1541460
1358830	1491545	1514737													1541561
1515715	1496373	1502260													1541728
1519910	1408048	1519518													1541961
1518576	1490846	1461798													1542388
1482791	1505395	1483176													1542472
1461840	1490714	1387164													1542610
1128474	1523130	1466816													1542842
1505672	1492890	1471822													1542918
1461072	1368742	1099113													1542987
1489129	1598001	1541162													1543223
1462183	1595391	1291394													1543329
1550833	1371135	1479835													1543410
1479246	1526019	1479771													1543413
1439783	1522014	1551499													1543420
1460397	1520494	1547235													1543432
1353459	1446240	1484739													1543830
1106253	1153542	1537650													1543930
1435987	1536423	1506711													1544319
1515724	1527738	1442540													1544618
1519815	1489299	1443216													1544770
1540454	1545045	1323901													1544868
1598942	1539225	1522275													1544870
1363054	1557935	1521962													1545030
1510547	1439343	1520494													1545059
1525142	1521962	1513565													1545099
1520062	1464352	1598601													1545304
1503830	1473331	1528281													1545472
1491223	1475342	1503140													1545481
1530220	1497217	1565792													1545756
1446638	1512287	1348231													1545790
1436003	1515090	1522177													1546030
1525295	1514346	1527921													1546254
1530791	1290465	1546961													1546320
1534004	1452915	1483902													1546649
1513261	1538148	1599213													1546754
1480879	1512014	1130616													1546840
1468886	1460595	1519635													1546913
1347705	1516443	1510839													1547052
1459611	1552708	1556645													1547071
1523042	1520525	1470195													1547169
1494501	1473464	1466895													1547569
1520479	1543410	1500601													1547727
1475924	1519044	1557935													1547769
1384074	1512229	1498051													1547842
1467678	1471694	1486323													1548042
1452288	1584900	1445765													1548062
1480088	1375416	1350271													1548293
1501689	1451573	1509866													1548463
1509288	1470743	1395526													1548593
1456584	1027173	1519829													1549737
1529864	1489541	1335983													1549803
1474781	1539684	1503213													1549906
1534463	1370793	1504248													1549936
1533414	1528706	1326901													1549996
1585612	1430444	1523130													1550061
1377358	1458302	1440527													1550242
1599721	1519222	1326305													1550250
1343642	1103058	1378979													1550317
1482372	1542653	1552698													1550320
1338466	1511238	1503436													1550513
1473174	1463877	1496512													1550528
1468343	1484484	1512714													1550954
1513652	1496393	1510958													1551038
1538148	1538212	1366549													1551083
1513095	1452702	1481877													1551308
1488944	1519540	1547543													1551349
1481877	1514282	1534011													1551422
1552914	1527131	1453879													1551499
1481969	1460383	1459411													1551509
1433155	1531888	1539476													1551561
1456514	1322572	1392393													1551615
1557369	1535738	1087891													1551690
1569558	1505672	1525601													1551807
1341313	1483567	1559481													1551809
1586808	1457236	1362057													1551879
1463336	1446740	1480645													1551976
1468942	1513253	1413544													1552026
1565926	1549906	1460370													1552230
1475614	1547199	1499204													1552317
1550946	1497231	1324687													1552403
1534393	1556564	1476866													1552459
1525601	1544817	1547727													1552520
1454737	1557105	1521722													1552531
1529199	1506100	1492706													1552573
1481879	1380639	1466808													1552664
1536877	1483493	1502892													1552698
1477485	1458754	1446512													1552713
1504694	1543209	1538140													1552891
1460595	1549996	1537495													1552904
1455014	1374570	1551722													1553073
1482594	1449387	1349554													1553719
1438486	1540148	1594173													1553845
1450601	1465130	1344959													1553903
1542223	1462137	1601209													1554268
1379840	1488895	1493745													1554682
1489139	1504248	1442139													1554828
1455204	1510087	1521440													1555067
1499162	1585418	1487522													1555490
1445552	1599055	1555493													1555852
1514461	1554832	1466826													1555914
1459297	1526283	1590178													1556448
1528823	1521260	1566443													1556564
1492451	1446094	1499565													1556645
1535810	1359553	1594770													1556669
1508743	1491090	1561440													1556781
1368451	1506005	1540059													1556994
1467142	1479417	1461336													1556997
1548062	1515605	1446438													1557105
1495792	1370208	1549940													1557296
1500888	1381902	1549996													1557369
1478969	1499204	1544849													1557935
1520511	1446512	1557283													1558884
1513889	1503140	1523127													1559194
1374157	1488557	1525494													1559204
1517029	1473174	1080791													1559320
1537987	1500594	1466549													1560238
1370182	1541561	1549791													1560462
1540848	1473789	1450601													1560911
1457096	1503235	1539914													1561007
1377855	1583426	1488334													1561737
1584118	1496706	1479044													1561808
1520014	1561737	1491730													1561862
1348452	1508412	1147435													1562843
1354038	1518111	1470833													1563312
1499522	1555490	1559860													1563619
1590915	1445333	1452857													1563685
1432579	1495824	1508241													1563925
1600367	1590953	1365504													1564265
1453482	1388805	1460753													1564392
1517144	1512179	1476805													1564720
1509699	1499290	1567159													1565273
1491175	1538734	1455846													1565697
1502597	1491188	1159212													1565747
1486638	1469542	1511052													1566282
1381695	1545472	1540993													1566395
1542610	1588339	1547552													1566443
1343040	1454575	1601118													1566886
1499870	1357575	1517465													1567547
1326522	1498904	1590397													1567970
1517174	1531600	1493143													1568087
1370208	1479544	1500888													1568122
1509494	1500804	1453479													1568331
1444037	1511046	1358529													1568343
1594502	1374170	1508412													1568382
1501953	1377429	1513372													1568785
1483176	1489118	1563853													1569399
1329483	1557234	1510801													1569558
1506787	1349830	1589859													1570897
1384066	1549737	1408048													1573108
1162314	1045599	1545756													1576774
1455761	1512113	1515830													1579262
1463802	1501354	1491599													1580646
1561862	1483069	1549936													1580981
1456955	1504362	1541728													1582767
1518994	1548906	1565747													1582908
1452978	1505100	1544618													1584359
1539565	1350271	1525065													1584900
1491206	1463117	1347705													1585792
1514297	1467754	1511573													1585851
1342711	1347452	1453734													1586050
1554798	1526248	1527577													1587039
1487273	1532879	1537727													1587528
1464200	1507673	1566726													1588073
1336014	1327596	1378276													1588874
1475623	1501036	1550301													1589564
1495150	1465714	1453482													1589999
1432037	1562197	1568382													1590000
1553370	1544877	1568192													1590354
1548496	1535848	1502272													1590397
1562197	1507090	1388546													1591501
1545304	1388477	1354411													1592222
1533226	1451962	1479280													1592399
1461336	1519086	1462183													1592603
1476756	1492904	1534351													1593470
1541162	1548463	1580981													1593559
1530364	1477875	1321045													1593664
1543401	1058589	1601362													1594176
1520475	1520832	1498959													1594642
1499189	1503237	1566886													1594803
1509580	1591057	1463790													1595391
1064468	1525312	1527171													1595511
1545472	1499874	1521869													1596274
1585888	1535140	1586050													1596585
1448965	1497653	1446763													1597086
1339657	1530576	1471474													1597111
1498959	1541728	1490625													1597405
1444467	1492222	1553903													1597432
1453570	1452065	1568132													1597455
1536851	1540953	1490560													1597498
1471537	1521510	1551807													1597879
1467507	1460368	1359553													1597924
1546961	1520573	1473555													1598571
1493495	1537869	1507313													1598601
1554937	1539789	1536541													1598614
1480064	1452857	1461935													1599116
1539476	1594803	1499290													1599527
1484195	1531798	1477768													1599530
1526841	1484339	1485631													1599709
1165760	1088334	1461561													1599794
1502606	1553980	1391134													1600525
1506726	1597305	1527743													1600988
1545524	1498493	1528186													1601194
1493645	1524721	1470801													1601348
1545099	1516383	1467740
1597839	1486638	1493931
1525312	1556781	1073034
1363500	1520765	1548068
1440527	1539476	1599530
1468258	1553301	1496502
1486926	1498051	1565273
1523283	1392095	1391966
1556499	1535181	1468830
1506435	1520146	1496962
1542591	1517631	1456931
1485445	1564392	1497581
1322880	1517232	1361179
1519222	1453284	1509494
1473880	1491760	1599116
1476866	1105385	1453222
1540822	1364035	1492288
1601272	1515093	1449310
1357544	1483066	1464505
1525016	1509480	1352787
1321481	1537405	1379509
1460368	1454558	1558884
1513485	1566443	1548463
1496003	1526022	1493740
1468050	1595174	1458634
1565273	1487255	1468924
1526022	1496417	1489601
1559980	1442365	1597839
1496792	1462991	1375416
1411855	1484232	1570876
1557935	1491420	1533872
1508241	1351755	1503237
1522660	1486335	1567453
1524574	1523940	1477027
1490373	1567453	1453250
1536541	1460392	1338355
1550317	1507622	1535877
1456858	1494462	1553950
1476484	1495281	1555852
1533794	1449754	1442645
1491692	1542357	1365588
1474755	1585612	1552264
1466826	1448475	1542756
1489878	1597086	1520518
1459429	1478509	1493821
1541460	1544870	1532369
1549906	1446829	1172080
1463006	1355173	1468936
1598571	1492996	1386627
1463117	1457987	1506787
1496838	1553861	1433155
1387748	1533407	1503820
1561927	1478082	1387432
1520042	1599116	1554438
1601333	1565273	1556694
1507692	1026019	1566282
1543410	1481933	1137506
1547219	1381205	1486068
1377489	1555440	1535140
1469958	1487682	1411855
1585857	1359239	1477264
1539789	1556645	1583950
1498356	1491599	1376164
1478245	1481679	1511305
1473647	1161672	1593559
1500009	1474781	1480879
1533016	1509288	1579075
1489483	1472651	1536351
1472219	1442139	1381205
1517473	1462131	1597455
1550250	1479670	1509917
1548523	1596776	1491790
1354411	1529853	1456858
1545195	1523561	1457096
1551425	1497476	1600016
1546064	1489139	1576427
1461798	1326522	1481195
1470178	1466597	1526830
1531865	1507946	1529426
1392577	1523168	1501269
1532779	1541311	1550389
1469542	1524153	1374041
1392095	1512080	1339657
1599801	1590397	1598571
1349300	1549279	1320004
1510087	1482142	1474962
1464505	1521315	1456699
1528826	1468445	1585553
1342374	1515258	1535848
1552573	1549930	1559204
1385353	1554828	1546913
1369414	1470801	1451046
1533977	1324687	1347837
1512028	1551809	1508829
1028062	1549803	1461290
1503213	1541314	1512497
1493690	1535490	1465980
1546937	1523146	1456375
1544868	1461052	1467556
1499410	1523372	1457381
1534353	1347837	1447455
1538335	1510801	1597902
1473464	1533378	1355173
1510097	1514323	1543830
1459411	1594222	1584571
1170661	1528925	1525655
1508412	1568122	1454125
1442540	1498356	1598220
1587039	1543073	1524625
1510092	1506562	1582667
1566443	1551771	1445917
1453879	1495588	1476312
1584109	1479218	1543223
1544839	1524442	1487293
1498940	1478938	1482101
1474735	1526639	1442365
1545059	1099113	1522447
1598601	1355261	1535490
1470743	1517051	1465344
1498047	1345490	1324007
1509420	1531865	1498945
1351755	1087735	1376440
1470378	1497996	1481172
1348032	1455904	1541460
1377153	1542610	1508083
1531069	1467865	1526841
1468936	1512810	1455898
1488348	1552589	1461302
1583950	1365349	1462061
1347359	1470195	1455834
1467502	1465817	1361103
1584864	1355586	1526509
1520276	1510684	1542693
1587528	1342014	1543073
1527731	1582344	1027173
1563312	1590000	1523146
1497730	1493764	1505395
1550311	1596404	1467105
1567547	1491117	1509408
1542472	1547489	1499666
1055668	1592381	1321814
1463790	1499830	1580771
1579918	1468915	1464650
1493197	1413544	1600413
1501861	1589490	1460907
1460621	1456501	1382775
1582767	1448348	1520511
1453711	1507441	1500614
1528353	1546177	1468017
1388182	1467740	1492468
1521869	1466470	1545059
1538436	1510060	1520376
1448279	1544229	1487738
1490625	1593559	1453906
1544319	1489601	1485656
1531023	1524040	1443387
1442573	1480879	1535893
1513565	1486067	1517029
1373768	1338355	1352156
1586659	1436541	1396020
1546177	1469926	1527030
1457381	1360710	1519092
1410908	1356192	1448712
1386443	1486260	1540674
1507673	1593470	1489836
1464941	1453011	1549775
1524651	1551083	1466597
1514737	1521024	1552531
1500721	1510394	1491692
1580342	1534495	1457627
1536516	1486926	1524651
1532156	1472485	1530576
1487934	1388126	1471653
1483787	1524636	1511477
1448262	1536367	1479670
1509553	1492344	1080982
1516031	1464522	1561862
1502638	1476892	1568087
1079374	1459906	1372100
1355173	1560238	1455558
1464352	1549775	1514501
1493740	1532554	1370833
1515727	1391658	1469947
1494676	1547882	1362793
1452026	1510547	1561007
1522990	1596279	1382236
1446561	1547040	1455821
1088334	1584359	1445510
1596776	1516020	1326514
1394045	1521794	1561927
1430337	1064468	1471701
1484683	1532895	1333617
1006783	1494253	1497653
1554544	1601272	1579495
1555852	1594642	1543432
1525238	1504649	1525756
1499881	1367006	1461558
1543930	1522140	1380607
1476439	1594973	1490377
1494762	1547394	1347822
1528536	1557630	1560238
1472085	1595511	1360710
1467740	1519253	1513485
1597879	1572436	1587039
1487485	1468920	1536516
1515001	1504641	1478958
1479574	1536721	1085134
1475999	1545099	1506970
1529426	1485498	1493826
1479670	1461511	1524435
1506643	1491223	1491617
1480797	1552713	1525312
1599527	1468947	1532810
1477875	1554198	1321818
1498221	1517473	1469315
1372100	1365808	1559320
1566282	1536429	1476395
1483497	1541963	1438486
1557630	1473650	1538086
1501856	1452978	1479417
1492764	1489486	1512664
1501024	1382775	1448965
1489076	1515096	1479787
1477368	1597879	1485344
1080791	1594670	1351855
1474962	1592222	1501715
1488334	1462442	1349920
1470026	1484351	1539684
1359571	1509420	1363579
1095389	1468929	1355208
1483184	1486552	1524721
1053856	1389761	1549906
1479417	1569535	1460458
1489441	1497243	1335674
1540187	1552531	1579262
1577111	1384491	1561808
1599171	1326364	1369212
1373733	1466826	1379354
1496716	1493762	1534344
1597111	1460370	1371135
1433763	1459227	1519939
1461290	1504694	1532776
1326364	1487485	1491420
1481353	1395134	1520042
1495508	1538436	1523760
1496877	1542693	1522140
1498373	1486952	1462991
1537232	1451822	1600178
1476934	1530220	1457505
1590000	1547219	1503223
1560238	1353459	1307227
1539225	1557369	1536851
1455762	1489813	1489813
1490714	1546553	1502638
1561737	1511833	1469863
1522998	1357544	1552904
1493979	1452924	1530662
1522644	1064571	1497153
1138061	1465166	1519988
1389979	1496560	1520014
1452957	1449594	1496393
1481470	1454240	1542472
1466411	1594502	1496003
1538050	1526250	1563925
1552459	1527171	1453422
1380639	1509896	1573180
1492515	1557168	1543219
1454956	1372566	1323604
1519253	1566282	1451573
1561808	1457441	1466272
1494359	1378249	1497406
1598614	1509366	1504511
1536351	1346523	1377489
1501795	1454599	1458175
1521389	1589198	1507851
1502493	1537372	1492609
1515657	1527882	1379098
1334573	1053856	1542322
1453742	1444251	1460103
1538895	1582908	1387047
1489593	1369212	1519253
1504297	1150303	1477565
1503112	1479639	1551083
1466543	1502908	1442573
1557680	1065027	1516468
1511238	1531745	1553845
1512663	1460277	1507622
1534524	1514836	1032959
1508104	1538758	1542987
1467556	1526037	1535025
1349920	1463849	1532205
1489401	1474944	1463775
1516408	1482688	1505111
1492468	1448200	1481205
1476892	1533310	1518590
1582908	1324589	1446187
1537758	1501953	1444251
1582667	1538442	1489076
1485936	1467102	1375653
1592399	1544319	1524645
1463347	1535854	1465714
1550851	1583971	1509904
1512677	1394045	1542653
1509426	1468674	1504188
1503820	1455513	1499364
1505111	1463022	1477986
1467115	1518822	1517144
1470825	1535708	1542918
1508401	1478363	1355503
1498225	1479982	1505547
1499042	1512393	1510975
1561039	1387164	1373733
1539312	1483776	1503598
1494364	1519988	1533016
1557120	1521801	1490342
1532879	1498225	1514297
1396025	1510958	1483768
1596585	1456394	1512014
1549996	1486720	1539565
1368755	1391966	1483776
1541465	1589859	1499283
1409043	1541735	1469926
1516704	1513889	1553719
1452006	1440666	1343642
1475916	1555914	1490846
1498051	1342374	1520146
1496393	1599537	1495306
1514391	1325026	1513955
1473055	1536351	1474160
1556994	1480064	1537987
1496228	1496228	1454395
1521443	1522655	1487335
1551499	1534463	1492716
1531798	1492702	1551146
1500129	1455761	1532165
1503636	1444467	1389876
1503237	1515242	1479802
1323604	1522024	1541114
1464812	1582539	1566395
1489118	1482372	1591501
1511602	1487426	1474946
1531804	1501350	1498221
1481539	1545462	1553073
1515196	1536710	1355971
1539711	1488691	1485455
1561991	1527921	1476931
1458634	1480271	1496428
1538775	1516468	1531533
1488994	1544618	1459350
1491420	1332498	1364349
1384491	1483768	1598614
1549816	1442810	1463385
1441637	1462823	1331398
1355113	1487776	1459363
1477768	1510551	1533794
1458302	1509223	1540187
1519792	1479802	1510383
1385755	1552434	1462617
1458748	1525430	1453742
1130616	1499258	1484683
1494428	1518401	1543070
1584900	1130616	1543079
1487529	1493197	1394405
1496215	1520891	1534064
1494420	1485471	1506616
1557395	1503067	1456127
1378276	1454182	1444763
1472588	1551807	1066869
1466776	1498713	1456624
1456973	1503431	1519340
1561007	1334502	1533226
1364659	1022753	1472605
1349346	1494247	1594176
1592222	1507692	1489770
1535893	1525393	1546064
1517258	1495271	1495980
1376807	1468650	1499874
1529143	1481929	1521313
1389761	1499881	1538050
1527131	1477841	1579918
1330732	1525635	1444471
1565792	1565860	1381800
1487293	1407531	1064571
1589649	1485366	1551896
1360481	1134595	1407586
1529859	1507792	1342711
1522030	1433346	1596274
1600525	1512714	1495271
1481205	1509116	1065027
1458814	1591078	1563685
1474767	1528484	1552026
1496428	1551509	1486552
1465093	1513531	1467494
1363003	1470806	1521908
1558884	1442702	1528739
1359553	1552573	1465559
1566976	1338814	1493575
1500614	1388182	1431483
1487429	1472830	1501814
1543432	1474755	1463463
1537483	1497372	1540839
1502870	1477425	1409390
1468830	1579216	1586680
1035320	1360022	1545472
1597924	1543930	1458852
1463224	1407587	1499850
1538769	1597405	1498610
1502080	1376222	1028062
1534495	1484683	1455197
1525756	1517486	1517051
1597086	1598601	1551209
1484739	1538912	1470490
1549569	1524435	1368260
1504295	1369921	1342374
1417689	1513298	1493566
1530634	1378447	1442352
1539724	1551308	1449594
1549737	1535810	1481123
1510284	1333617	1321481
1593559	1513158	1521309
1538935	1466785	1513577
1532554	1499159	1551422
1484351	1442949	1411023
1374170	1518310	1519627
1534289	1477934	1479358
1465636	1043754	1534495
1493143	1343642	1471729
1466340	1384074	1486181
1473650	1551863	1455762
1457627	1453995	1483265
1566336	1520149	1543329
1395134	1516031	1022753
1142553	1515454	1539225
1455413	1568785	1492451
1487419	1522452	1473869
1515838	1483176	1481958
1538086	1532163	1479218
1465100	1540848	1598008
1338377	1073034	1556448
1552708	1481253	1485059
1498488	1521869	1519231
1339501	1416332	1526361
1537699	1502597	1367826
1454125	1350093	1506135
1463775	1519627	1526613
1524158	1448279	1530347
1507078	1490373	1455509
1585522	1492209	1594642
1446378	1548593	1089537
1491730	1478759	1470354
1546320	1494230	1164687
1526019	1502484	1478245
1355971	1503808	1546840
1559481	1504044	1506726
1504188	1479246	1487422
1490377	1543401	1570074
1473711	1432513	1520573
1521542	1533896	1532156
1501215	1548202	1477841
1544770	1533414	1489514
1526283	1545790	1516201
1516468	1545304	1503343
1563685	1518576	1459818
1365504	1464200	1389512
1330758	1476484	1452118
1533987	1495297	1334502
1575428	1539098	1569535
1366549	1456973	1590338
1519611	1458306	1466743
1580981	1523671	1455513
1525626	1477368	1530361
1539820	1500009	1385582
1460103	1349300	1337077
1535416	1520475	1466482
1492716	1479574	1487100
1370793	1489389	1476808
1552664	1493645	1548028
1391816	1484737	1392095
1542413	1512295	1548202
1579035	1477877	1539820
1552589	1489514	1507205
1522407	1595738	1322880
1464498	1484017	1534289
1376222	1476808	1517473
1529591	1485518	1492904
1452112	1502272	1564720
1519048	1447547	1544770
1502260	1377489	1563619
1550320	1509408	1530364
1510406	1356095	1445835
1468053	1551146	1475614
1519092	1394405	1600903
1437718	1567237	1479391
1521440	1017362	1507441
1375001	1504297	1467472
1027173	1550317	1499404
1494230	1550954	1573108
1536931	1367601	1597077
1535140	1492451	1463224
1374041	1484816	1501689
1498158	1539719	1545290
1476377	1564265	1502077
1542987	1489441	1523283
1530347	1468258	1408977
1552904	1458748	1488544
1464326	1505943	1515454
1536417	1494988	1500024
1508246	1524855	1548042
1494018	1469749	1449776
1550041	1505393	1466776
1568382	1504888	1504753
1495477	1507157	1588237
1499290	1326514	1556679
1493695	1467507	1550320
1457964	1523283	1464326
1552713	1469614	1351323
1459906	1528823	1536723
1462341	1339501	1484652
1499536	1511628	1499522
1376440	1445835	1497670
1466758	1463347	1514145
1438131	1528541	1497996
1513498	1491790	1508835
1159212	1498052	1479580
1510839	1453132	1438131
1580646	1475717	1489669
1376994	1505112	1456120
1525494	1379509	1595511
1556564	1453117	1351755
1599794	1559320	1348106
1482099	1491175	1491466
1494814	1489857	1524040
1551422	1343040	1510579
1448200	1504365	1597405
1598220	1525601	1514229
1480069	1525911	1407661
1498659	1515727	1498904
1064571	1162314	1511393
1471307	1534011	1546754
1599530	1355596	1429968
1525655	1479933	1518094
1509904	1455114	1489483
1565625	1601194	1476546
1332298	1522662	1030818
1507622	1508028	1523928
1559194	1512792	1513831
1504753	1555551	1550954
1575802	1336120	1503830
1446829	1382431	1356660
1436138	1538606	1176773
1392129	1292105	1410737
1473979	1460204	1503808
1499874	1349346	1523671
1500477	1542388	1472588
1519627	1467549	1550061
1449310	1494830	1354579
1506605	1374157	1550513
1550954	1599794	1552713
1467472	1479391	1600988
1559320	1569558	1323213
1587591	1492609	1498671
1509866	1468942	1496716
1385063	1522466	1510406
1537364	1521125	1471105
1498214	1459789	1484321
1463345	1522478	1555914
1521309	1439947	1597086
1456375	1453250	1555490
1555914	1541342	1593957
1548463	1529534	1550311
1445917	1461840	1458539
1517232	1514229	1537372
1477404	1508743	1601194
1563426	1362387	1365601
1505100	1474441	1546744
1540839	1550320	1105717
1444251	1482791	1128174
1479044	1483787	1474872
1564265	1534353	1536862
1459775	1526113	1494018
1520573	1508657	1499536
1369212	1533732	1583949
1453250	1499042	1594339
1601194	1531721	1412833
1430444	1350558	1074123
1463208	1496003	1498873
1479391	1492716	1596585
1527882	1433487	1551615
1550528	1495150	1547394
1519829	1506566	1466470
1551807	1380607	1349346
1544659	1517144	1484818
1413544	1560911	1517558
1579610	1455197	1593805
1489857	1378784	1330732
1516317	1347705	1538601
1457249	1480592	1509426
1474160	1509580	1500129
1479835	1484387	1463806
1552230	1387380	1501606
1507851	1466031	1539234
1453222	1487335	1479602
1555490	1552564	1505420
1490375	1476866	1064468
1090115	1506711	1555067
1462738	1524147	1492890
1484321	1442255	1472924
1137506	1551615	1554205
1366981	1446378	1529534
1411149	1515732	1552230
1479982	1473055	1497276
1485498	1461561	1509896
1459227	1497731	1510285
1489299	1487422	1599794
1487100	1544802	1158964
1595391	1539312	1557395
1498434	1563815	1512677
1375416	1531069	1506159
1470085	1332298	1515547
1350382	1368535	1462423
1497897	1480169	1469848
1540366	1463208	1563606
1452857	1499522	1567280
1527577	1530361	1370118
1505922	1463006	1457263
1599116	1351860	1460383
1389876	1600367	1484816
1530017	1498967	1586208
1534011	1541162	1541465
1501822	1521023	1378700
1407718	1352787	1498214
1554682	1382918	1497897
1499565	1526068	1533555
1458631	1463224	1468507
1517330	1453654	1532779
1493762	1593475	1525207
1431483	1355627	1561737
1498893	1567970	1587528
1587537	1464312	1411149
1497731	1488994	1510080
1524625	1491206	1510933
1510732	1437161	1554682
1347822	1494501	1410375
1396363	1432579	1437161
1532295	1557265	1533977
1503598	1515001	1351441
1446187	1552230	1587537
1479959	1551976	1594803
1473869	1600620	1437718
1466470	1456955	1364659
1477264	1461935	1504297
1164687	1468924	1394102
1460907	1455336	1547402
1551308	1462957	1535568
1324007	1459746	1165760
1431801	1498246	1569399
1485344	1532779	1586411
1455904	1481697	1490309
1518044	1453711	1467033
1458539	1492253	1466015
1499656	1442573	1513298
1534344	1019023	1431891
1540798	1494814	1341313
1528186	1476804	1453233
1537763	1449632	1546254
1477816	1501795	1530891
1540193	1544868	1532295
1506566	1462617	1481539
1565697	1321481	1582539
1494703	1506787	1507289
1457570	1360410	1465353
1466878	1523934	1601195
1514229	1497047	1468050
1552026	1549701	1559194
1510501	1475623	1538775
1552531	1463385	1448018
1392021	1393320	1535871
1362387	1490261	1542610
1381800	1565697	1378447
1533771	1466543	1360056
1564392	1448712	1452006
1523760	1510054	1528925
1557283	1471474	1449775
1370833	1464812	1528940
1553845	1520784	1597498
1597405	1491692	1528188
1445835	1525438	1518142
1461199	1545524	1580646
1480123	1468502	1570019
1523561	1446561	1599709
1497243	1467119	1509442
1495543	1489076	1321691
1348421	1545481	1041163
1460370	1455204	1531261
1517558	1445765	1585851
1551561	1479959	1482142
1045599	1474953	1538166
1543420	1493495	1543413
1395371	1538881	1552403
1476051	1549936	1385063
1543817	1481879	1495477
1515665	1381695	1055668
1452128	1489401	1533310
1517149	1521309	1586808
1459498	1446440	1536429
1456528	1350265	1521801
1542918	1138061	1533378
1522738	1556653	1362387
1492904	1540044	1504649
1456120	1470378	1600620
1445765	1392552	1468031
1435483	1597111	1485583
1522029	1452967	1395201
1512985	1391816	1547036
1542388	1480894	1177319
1551083	1525756	1516317
1498873	1459411	1541314
1470801	1525626	1345490
1326514	1527875	1534483
1479580	1547543	1384651
1532895	1517235	1564265
1468674	1480919	1484432
1394518	1556997	1447547
1586848	1573939	1473055
1509277	1550250	1506036
1080982	1484432	1442702
1529531	1513831	1325814
1466371	1515813	1501822
1533727	1531906	1531250
1569399	1516201	1458022
1448348	1548301	1043754
1348231	1496716	1432037
1530582	1554714	1435961
1503223	1542413	1517486
1550061	1373768	1535679
1547893	1383462	1457570
1485059	1600525	1382031
1383462	1489483	1559584
1494966	1364659	1432107
1540044	1152264	1468502
1592603	1368755	1449632
1491589	1329483	1513498
1546254	1460397	1363943
1479994	1316505	1547769
1503098	1499870	1531793
1600413	1592466	1529853
1367633	1484566	1462341
1461561	1033121	1563415
1519083	1569399	1524153
1515096	1494268	1344666
1495271	1459025	1068905
1439947	1456120	1520149
1539904	1355321	1554828
1483768	1347359	1519083
1491466	1379840	1458814
1521801	1509277	1550528
1537486	1490708	1487419
1513577	1592399	1530888
1487478	1456528	1366939
1484432	1537495	1414504
1474872	1556448	1462919
1535568	1517356	1592603
1560911	1407586	1469013
1479521	1456622	1575428
1496502	1479994	1457441
1530576	1478782	1511775
1513029	1513565	1519048
1290465	1541565	1489857
1445145	1469013	1549816
1590397	1561039	1489401
1515208	1484409	1407718
1522140	1352594	1494364
1547169	1559194	1355627
1518401	1499189	1464200
1553073	1509426	1370463
1546649	1517350	1537483
1448331	1521783	1472085
1479358	1573108	1515715
1519635	1543079	1462738
1551349	1484652	1496228
1500024	1455509	1435521
1467033	1502892	1594967
1556448	1390719	1481061
1501269	1387181	1498434
1552520	1339755	1352594
1462957	1522556	1565697
1482139	1462183	1563177
1499207	1549732	1407619
1498904	1458539	1439947
1456589	1533977	1446561
1389448	1457570	1534209
1363706	1535117	1387380
1362793	1523183	1544659
1524153	1510406	1531745
1519939	1538601	1570897
1385506	1372056	1562843
1388477	1492288	1561991
1361519	1501814	1547569
1012669	1444037	1410392
1544182	1551038	1479982
1456627	1435961	1466878
1507061	1459031	1537405
1471474	1501024	1597832
1467494	1467478	1552520
1484652	1474249	1494247
1369325	1502495	1375047
1447547	1468507	1507792
1370463	1487478	1467115
1520146	1344596	1334573
1455197	1495477	1497372
1522848	1536723	1482139
1529855	1486980	1498425
1452214	1129112	1384535
1468027	1508104	1528706
1535679	1458054	1487426
1468507	1470957	1486926
1480556	1543830	1392129
1369295	1548042	1350265
1532355	1496432	1548523
1462919	1519546	1443568
1487422	1532147	1326694
1477391	1512307	1465255
1488695	1457381	1385506
1594339	1529591	1411841
1480208	1599527	1442683
1528706	1369414	1446740
1507090	1481061	1473464
1502892	1449740	1476298
1331398	1459611	1457928
1588874	1519928	1550242
1526069	1469317	1435483
1560462	1525016	1547169
1475943	1377833	1533727
1544618	1525238	1457249
1547769	1431000	1435987
1508835	1473476	1539587
1547569	1520276	1446729
1380607	1520014	1468087
1517051	1375001	1494814
1573108	1533801	1512663
1483776	1585851	1549569
1432107	1466743	1523183
1597498	1432107	1451557
1497996	1467472	1468947
1568785	1533016	1501640
1470195	1369295	1512587
1041163	1597924	1582496
[truncated: 357 more rows]
