# Supplementary material for: Coordinated Gene Family Evolution Shapes the Genome of Dimorphic Organisms
Source: Research Square preprint supplement (doi:10.21203/rs.3.rs-6393820/v1), 2025-04-08
Supplement: Supplementary file 2 [file 49cefe6bd740c96e724811e5.pdf]

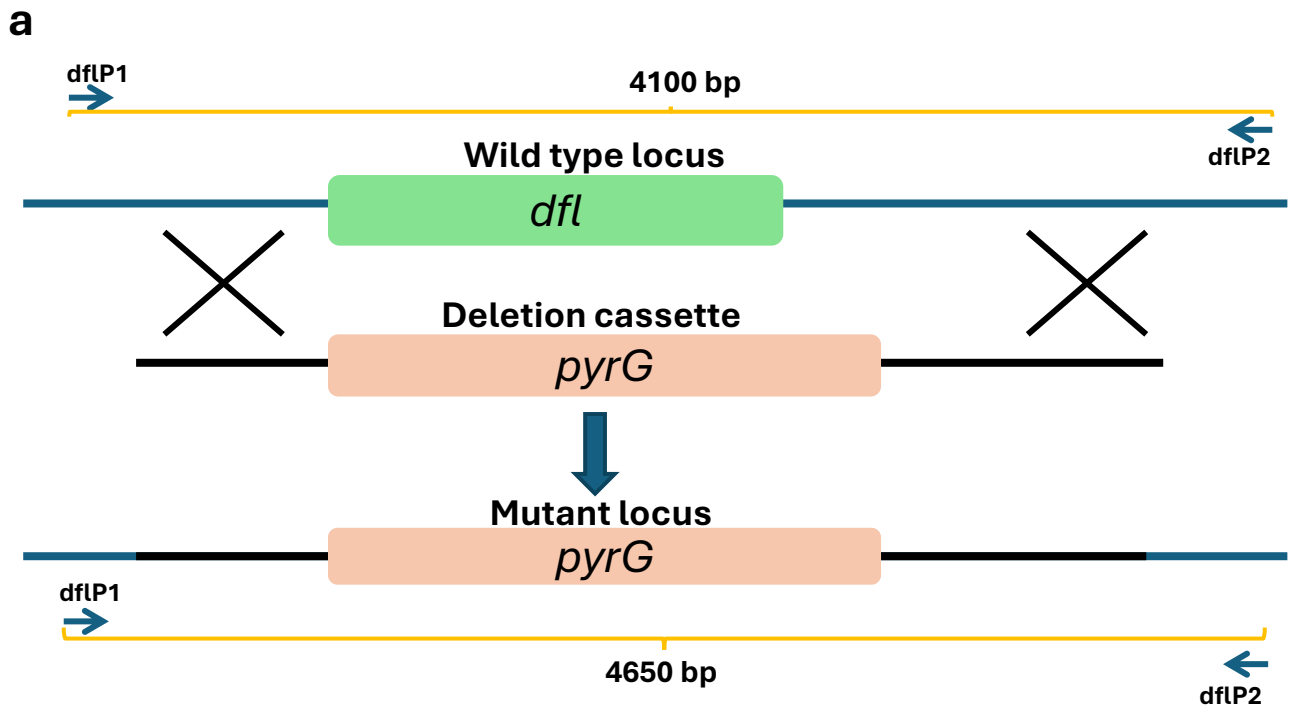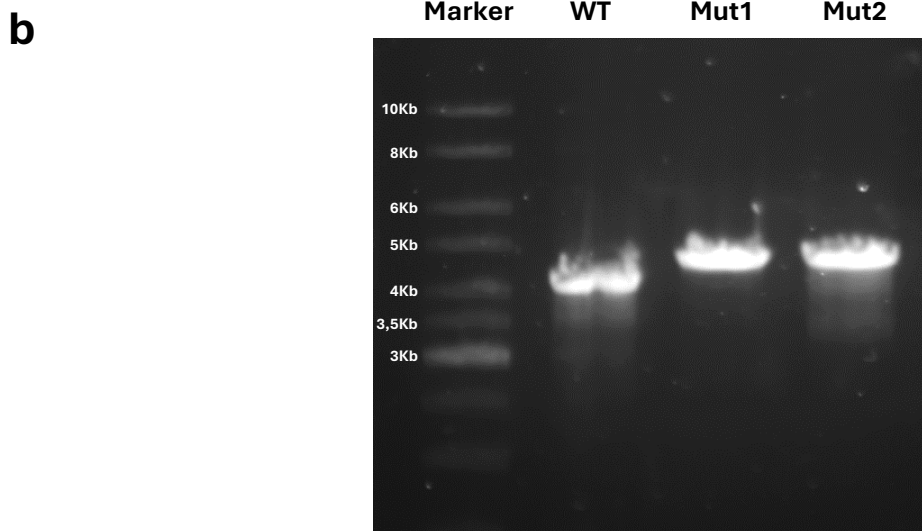

**Supplementary Figure 4. Generation of mutant strains by deletion of the gene *dfl*.** **a** Wild type locus (in green) recombines with the deletion cassette (in orange) which contains the auxotrophy marker *pyrG*. The new mutant locus amplifies a 4650 bp fragment by PCR with the primers dfIP1/dfIP2, whereas the wild type locus amplifies a 4100 bp fragment. **b** Validation PCRs showed that Mut1 and Mut2 transformants had the correct mutant locus.
