# Supplementary material for: Coordinated Gene Family Evolution Shapes the Genome of Dimorphic Organisms
Source: Research Square preprint supplement (doi:10.21203/rs.3.rs-6393820/v1), 2025-04-08
Supplement: Supplementary file 2 [file 33298430e015e6f963b1a492.xlsx]

## Sheet: GFDP
GENE FAMILIES WITH DIMORPHIC PARALOGS
Cluster	ID	Expression	Morfologia	NumberProteins_filtered
Cluster 27	1350558	2.60923	Yeast	2
Cluster 27	1515105	-1.53969	Mycelium	2
Cluster 36	1526693	-2.69774	Mycelium	2
Cluster 36	1560124	1.5797	Yeast	2
Cluster 60	1476707	-4.81385	Mycelium	2
Cluster 60	1588073	5.07269	Yeast	2
Cluster 83	1446438	1.7969	Yeast	2
Cluster 83	1549130	-6.53027	Mycelium	2
Cluster 92	1494161	1.12328	Yeast	2
Cluster 92	1510024	-3.61036	Mycelium	2
Cluster 109	1437982	-4.69409	Mycelium	2
Cluster 109	1458659	1.3255	Yeast	2
Cluster 123	1369083	-1.5604	Mycelium	2
Cluster 123	1542653	2.32006	Yeast	2
Cluster 153	1369584	-4.42564	Mycelium	2
Cluster 153	1598001	1.70776	Yeast	2
Cluster 174	1573108	3.7299	Yeast	2
Cluster 174	1601665	-1.02777	Mycelium	2
Cluster 201	1536516	2.48912	Yeast	2
Cluster 201	1596010	-1.98522	Mycelium	2
Cluster 203	1488761	-4.45487	Mycelium	2
Cluster 203	1506100	1.77487	Yeast	2
Cluster 211	1362797	-1.6439	Mycelium	2
Cluster 211	1530891	4.70314	Yeast	2
Cluster 234	1345802	1.28639	Yeast	2
Cluster 234	1459002	-4.6382	Mycelium	2
Cluster 245	1544618	4.2295	Yeast	2
Cluster 245	1554103	-2.11141	Mycelium	2
Cluster 263	1500453	1.05758	Yeast	2
Cluster 263	1540333	-2.57201	Mycelium	2
Cluster 307	1512014	2.34938	Yeast	2
Cluster 307	1533178	-1.61279	Mycelium	2
Cluster 317	1594973	2.09939	Yeast	2
Cluster 317	1596028	-2.9808	Mycelium	2
Cluster 8672	1520146	3.75585	Yeast	2
Cluster 360	1497021	-2.00797	Mycelium	2
Cluster 360	1507692	2.33	Yeast	2
Cluster 388	1487360	1.14567	Yeast	2
Cluster 388	1587157	-3.4974	Mycelium	2
Cluster 411	1390474	-6.55658	Mycelium	2
Cluster 411	1446440	2.80432	Yeast	2
Cluster 419	1373733	2.3333	Yeast	2
Cluster 419	1483794	-5.75331	Mycelium	2
Cluster 423	1512714	2.34418	Yeast	2
Cluster 423	1562323	-1.7428	Mycelium	2
Cluster 437	1466272	2.27888	Yeast	2
Cluster 437	1493274	-4.54492	Mycelium	2
Cluster 1071	1367601	2.49248	Yeast	2
Cluster 453	1470277	-1.40378	Mycelium	2
Cluster 453	1512612	1.06684	Yeast	2
Cluster 492	1599794	2.86727	Yeast	2
Cluster 492	1533835	-2.13772	Mycelium	2
Cluster 506	1498920	1.42685	Yeast	2
Cluster 506	1526350	-1.52122	Mycelium	2
Cluster 529	1530031	-2.0544	Mycelium	2
Cluster 529	1540977	1.3316	Yeast	2
Cluster 575	1511388	1.10651	Yeast	2
Cluster 575	1533943	-3.28402	Mycelium	2
Cluster 611	1390831	-2.23083	Mycelium	2
Cluster 611	1481933	5.00215	Yeast	2
Cluster 620	1365808	6.94942	Yeast	2
Cluster 620	1509711	-3.73899	Mycelium	2
Cluster 623	1360607	-1.14355	Mycelium	2
Cluster 623	1436868	6.62383	Yeast	2
Cluster 625	1395201	3.15556	Yeast	2
Cluster 625	1473376	-3.36489	Mycelium	2
Cluster 637	1506211	4.39969	Yeast	2
Cluster 637	1550490	-2.4085	Mycelium	2
Cluster 648	1506726	3.33796	Yeast	2
Cluster 648	1598903	-1.13277	Mycelium	2
Cluster 657	1343417	1.42876	Yeast	2
Cluster 657	1460102	-1.40042	Mycelium	2
Cluster 659	1476875	-2.12402	Mycelium	2
Cluster 659	1479266	2.36688	Yeast	2
Cluster 663	1468589	-2.70977	Mycelium	2
Cluster 663	1558819	1.62053	Yeast	2
Cluster 681	1462991	2.23537	Yeast	2
Cluster 681	1507374	-2.04344	Mycelium	2
Cluster 697	1479529	-4.90339	Mycelium	2
Cluster 697	1596676	1.50808	Yeast	2
Cluster 731	1520598	-9.0099	Mycelium	2
Cluster 731	1548202	2.61574	Yeast	2
Cluster 750	1456624	6.40249	Yeast	2
Cluster 750	1555650	-1.29429	Mycelium	2
Cluster 752	1377806	-2.70625	Mycelium	2
Cluster 752	1417078	1.64333	Yeast	2
Cluster 753	1369978	-4.78725	Mycelium	2
Cluster 753	1516544	1.46213	Yeast	2
Cluster 759	1473157	-2.39491	Mycelium	2
Cluster 759	1523130	1.73401	Yeast	2
Cluster 776	1502304	-1.99915	Mycelium	2
Cluster 776	1517558	3.61411	Yeast	2
Cluster 778	1453479	1.85041	Yeast	2
Cluster 778	1592918	-1.68392	Mycelium	2
Cluster 786	1465636	4.06014	Yeast	2
Cluster 786	1546216	-1.85633	Mycelium	2
Cluster 812	1371696	5.51874	Yeast	2
Cluster 812	1517295	-3.6894	Mycelium	2
Cluster 816	1461125	-1.77969	Mycelium	2
Cluster 816	1506616	2.42023	Yeast	2
Cluster 899	1370615	-1.06683	Mycelium	2
Cluster 899	1565843	1.13864	Yeast	2
Cluster 930	1388116	-2.46264	Mycelium	2
Cluster 930	1522421	1.63114	Yeast	2
Cluster 962	1396363	3.427	Yeast	2
Cluster 962	1555901	-5.7564	Mycelium	2
Cluster 2150	1483511	1.46174	Yeast	2
Cluster 969	1319807	-1.33279	Mycelium	2
Cluster 969	1534393	1.94659	Yeast	2
Cluster 986	1479847	-1.02142	Mycelium	2
Cluster 986	1496668	1.08685	Yeast	2
Cluster 1015	1480877	-6.78899	Mycelium	2
Cluster 1015	1548982	1.07525	Yeast	2
Cluster 1020	1369377	-1.56479	Mycelium	2
Cluster 1020	1407586	2.94293	Yeast	2
Cluster 1029	1468886	1.70667	Yeast	2
Cluster 1029	1515041	-3.99603	Mycelium	2
Cluster 1036	1489466	-1.97772	Mycelium	2
Cluster 1036	1524636	2.07119	Yeast	2
Cluster 1038	1325533	-2.26917	Mycelium	2
Cluster 1038	1515813	2.85113	Yeast	2
Cluster 1071	1494637	-2.43315	Mycelium	2
Cluster 1652	1412674	-1.36716	Mycelium	2
Cluster 1131	1380020	2.70154	Yeast	2
Cluster 1131	1596915	-2.05334	Mycelium	2
Cluster 1194	1472443	1.13098	Yeast	2
Cluster 1194	1521516	-2.78977	Mycelium	2
Cluster 1197	1541522	1.04945	Yeast	2
Cluster 1197	1552005	-9.5203	Mycelium	2
Cluster 1201	1456043	-5.8249	Mycelium	2
Cluster 1201	1476484	3.64585	Yeast	2
Cluster 1221	1460458	2.21959	Yeast	2
Cluster 1221	1542614	-1.11674	Mycelium	2
Cluster 1265	1434796	3.22555	Yeast	2
Cluster 1265	1568082	-3.63983	Mycelium	2
Cluster 1305	1355627	7.06847	Yeast	2
Cluster 1305	1450682	-4.64275	Mycelium	2
Cluster 1306	1479193	-1.15871	Mycelium	2
Cluster 1306	1480314	1.1585	Yeast	2
Cluster 1318	1486181	2.51822	Yeast	2
Cluster 1318	1536138	-4.12978	Mycelium	2
Cluster 1320	1531357	-1.73018	Mycelium	2
Cluster 1320	1549867	1.6978	Yeast	2
Cluster 1360	1531596	-2.05243	Mycelium	2
Cluster 1360	1563907	1.53241	Yeast	2
Cluster 1374	1365538	-1.29598	Mycelium	2
Cluster 1374	1468947	4.40377	Yeast	2
Cluster 1375	1510933	4.08549	Yeast	2
Cluster 1375	1545645	-7.34074	Mycelium	2
Cluster 8006	1468199	-14.2897	Mycelium	2
Cluster 1446	1489413	1.31224	Yeast	2
Cluster 1446	1592191	-1.36022	Mycelium	2
Cluster 2414	1407491	-6.51373	Mycelium	2
Cluster 1477	1540586	-2.78393	Mycelium	2
Cluster 1477	1540822	1.9911	Yeast	2
Cluster 1493	1465093	3.78657	Yeast	2
Cluster 1493	1532105	-1.5878	Mycelium	2
Cluster 1513	1026010	-3.15584	Mycelium	2
Cluster 1513	1408977	2.64792	Yeast	2
Cluster 1519	1005889	-2.02576	Mycelium	2
Cluster 1519	1452120	1.24885	Yeast	2
Cluster 1552	1471320	-1.73823	Mycelium	2
Cluster 1552	1536931	3.04821	Yeast	2
Cluster 1570	1480819	-3.4702	Mycelium	2
Cluster 1570	1509408	2.47843	Yeast	2
Cluster 1579	1506972	1.13551	Yeast	2
Cluster 1579	1580221	-4.4248	Mycelium	2
Cluster 1652	1561007	3.66501	Yeast	2
Cluster 1681	1360450	1.6867	Yeast	2
Cluster 1681	1590114	-10.7529	Mycelium	2
Cluster 1714	1458852	3.44711	Yeast	2
Cluster 1714	1460530	-4.48874	Mycelium	2
Cluster 1737	1370356	-4.20571	Mycelium	2
Cluster 1737	1542247	1.37256	Yeast	2
Cluster 1750	1460742	1.28022	Yeast	2
Cluster 1750	1523685	-1.07381	Mycelium	2
Cluster 1768	1375047	3.42991	Yeast	2
Cluster 1768	1575436	-3.14977	Mycelium	2
Cluster 1806	1320650	1.17608	Yeast	2
Cluster 1806	1364563	-3.08299	Mycelium	2
Cluster 1839	1537005	-2.24039	Mycelium	2
Cluster 1839	1544839	2.07401	Yeast	2
Cluster 1845	1362809	1.09585	Yeast	2
Cluster 1845	1451569	-2.71605	Mycelium	2
Cluster 1847	1457453	-3.02353	Mycelium	2
Cluster 1847	1587591	3.35459	Yeast	2
Cluster 1866	1514941	-1.72448	Mycelium	2
Cluster 1866	1524354	1.19884	Yeast	2
Cluster 1881	1340256	-2.414	Mycelium	2
Cluster 1881	1552403	5.51188	Yeast	2
Cluster 1887	1503673	1.31907	Yeast	2
Cluster 1887	1549604	-3.59734	Mycelium	2
Cluster 1900	1485929	1.29903	Yeast	2
Cluster 1900	1599218	-1.78687	Mycelium	2
Cluster 1935	1358765	-1.31742	Mycelium	2
Cluster 1935	1529077	1.03424	Yeast	2
Cluster 1996	1356660	2.73622	Yeast	2
Cluster 1996	1575591	-3.7087	Mycelium	2
Cluster 2031	1500164	-2.81539	Mycelium	2
Cluster 2031	1600988	2.75702	Yeast	2
Cluster 2060	1514145	2.67507	Yeast	2
Cluster 2060	1532418	-1.30864	Mycelium	2
Cluster 2069	1387047	2.29068	Yeast	2
Cluster 2069	1394253	-6.50893	Mycelium	2
Cluster 2092	1470515	-6.60848	Mycelium	2
Cluster 2092	1493670	3.93826	Yeast	2
Cluster 2109	1456973	2.44979	Yeast	2
Cluster 2109	1459691	-3.18326	Mycelium	2
Cluster 2126	1484069	-5.66146	Mycelium	2
Cluster 2126	1561737	2.92569	Yeast	2
Cluster 4604	1392237	-10.7915	Mycelium	2
Cluster 2150	1539293	-1.05629	Mycelium	2
Cluster 2187	1485518	2.47365	Yeast	2
Cluster 2187	1599978	-1.6118	Mycelium	2
Cluster 2296	1365532	-1.44406	Mycelium	2
Cluster 2296	1527731	2.48481	Yeast	2
Cluster 2350	1533794	2.40335	Yeast	2
Cluster 2350	1539127	-1.51611	Mycelium	2
Cluster 2399	1518826	-4.88235	Mycelium	2
Cluster 2399	1524625	4.05518	Yeast	2
Cluster 2414	1395371	7.91618	Yeast	2
Cluster 2416	1480015	-4.55851	Mycelium	2
Cluster 2416	1532554	2.57232	Yeast	2
Cluster 2521	1466371	3.44119	Yeast	2
Cluster 2521	1535864	-3.26031	Mycelium	2
Cluster 2534	1442589	-2.25013	Mycelium	2
Cluster 2534	1460082	1.16466	Yeast	2
Cluster 6095	1484524	-1.56446	Mycelium	2
Cluster 2600	1519199	-2.05278	Mycelium	2
Cluster 2600	1548977	1.47012	Yeast	2
Cluster 2603	1509106	-5.35205	Mycelium	2
Cluster 2603	1538959	1.03284	Yeast	2
Cluster 2609	1492253	2.72783	Yeast	2
Cluster 2609	1498426	-4.10952	Mycelium	2
Cluster 2628	1526742	-3.55	Mycelium	2
Cluster 2628	1536367	2.07406	Yeast	2
Cluster 2690	1512098	-2.85124	Mycelium	2
Cluster 2690	1514391	3.35612	Yeast	2
Cluster 2696	1444763	4.67973	Yeast	2
Cluster 2696	1515923	-2.31468	Mycelium	2
Cluster 2749	1521215	-2.26421	Mycelium	2
Cluster 2749	1528541	6.70433	Yeast	2
Cluster 2757	1486386	-2.04867	Mycelium	2
Cluster 2757	1538546	1.39789	Yeast	2
Cluster 2804	1472085	3.55057	Yeast	2
Cluster 2804	1483298	-1.33068	Mycelium	2
Cluster 2816	1464509	-3.5978	Mycelium	2
Cluster 2816	1486877	1.41099	Yeast	2
Cluster 2827	1505972	-1.1348	Mycelium	2
Cluster 2827	1550273	1.41879	Yeast	2
Cluster 2856	1355586	2.02141	Yeast	2
Cluster 2856	1533575	-3.12768	Mycelium	2
Cluster 2861	1373582	-7.42248	Mycelium	2
Cluster 2861	1591078	2.3458	Yeast	2
Cluster 2878	1493764	2.02686	Yeast	2
Cluster 2878	1592244	-6.11127	Mycelium	2
Cluster 2994	1542754	-4.72812	Mycelium	2
Cluster 2891	1520014	3.15183	Yeast	2
Cluster 2891	1523388	-1.28942	Mycelium	2
Cluster 2920	1323750	-1.0107	Mycelium	2
Cluster 2920	1391181	3.36778	Yeast	2
Cluster 2924	1490733	-4.93325	Mycelium	2
Cluster 2924	1518310	2.38952	Yeast	2
Cluster 2952	1504297	2.96298	Yeast	2
Cluster 2952	1516224	-1.62941	Mycelium	2
Cluster 2970	1505877	-1.0538	Mycelium	2
Cluster 2970	1586172	1.39032	Yeast	2
Cluster 2994	1380598	1.66665	Yeast	2
Cluster 3005	1535422	1.33948	Yeast	2
Cluster 3005	1566458	-1.55055	Mycelium	2
Cluster 3026	1465108	-8.64644	Mycelium	2
Cluster 3026	1471833	3.199	Yeast	2
Cluster 3052	1515724	1.7673	Yeast	2
Cluster 3052	1592817	-1.59937	Mycelium	2
Cluster 3060	1515892	-3.89913	Mycelium	2
Cluster 3060	1543079	2.99074	Yeast	2
Cluster 3105	1368535	2.66029	Yeast	2
Cluster 3105	1570085	-1.73761	Mycelium	2
Cluster 3110	1321719	-2.09112	Mycelium	2
Cluster 3110	1505547	5.62066	Yeast	2
Cluster 3126	1528841	-9.53601	Mycelium	2
Cluster 3126	1546649	3.54989	Yeast	2
Cluster 3180	1520136	-4.90629	Mycelium	2
Cluster 3180	1532895	4.18625	Yeast	2
Cluster 3190	1393965	-1.77988	Mycelium	2
Cluster 3190	1458664	1.19151	Yeast	2
Cluster 3230	1465344	2.05463	Yeast	2
Cluster 3230	1508248	-2.39097	Mycelium	2
Cluster 3353	1464418	-1.1389	Mycelium	2
Cluster 3285	1326364	2.14412	Yeast	2
Cluster 3285	1488688	-1.62088	Mycelium	2
Cluster 3323	1412833	5.47819	Yeast	2
Cluster 3323	1525855	-7.33519	Mycelium	2
Cluster 3333	1488444	-1.04792	Mycelium	2
Cluster 3333	1555852	2.10573	Yeast	2
Cluster 3340	1328040	-4.61887	Mycelium	2
Cluster 3340	1472485	2.06986	Yeast	2
Cluster 3353	1512179	1.81773	Yeast	2
Cluster 3390	1341313	2.98853	Yeast	2
Cluster 3390	1586714	-1.52342	Mycelium	2
Cluster 3391	1591057	1.8656	Yeast	2
Cluster 3391	1591578	-2.34344	Mycelium	2
Cluster 3398	1496838	3.63497	Yeast	2
Cluster 3398	1519911	-7.22956	Mycelium	2
Cluster 3441	1463983	-3.56691	Mycelium	2
Cluster 3441	1555493	5.48886	Yeast	2
Cluster 3454	1512810	2.01842	Yeast	2
Cluster 3454	1523474	-5.51751	Mycelium	2
Cluster 3621	1480333	-1.36334	Mycelium	2
Cluster 3621	1547989	1.27615	Yeast	2
Cluster 3647	1365006	-1.92247	Mycelium	2
Cluster 3647	1545916	1.66393	Yeast	2
Cluster 3648	1378888	-6.53132	Mycelium	2
Cluster 3648	1449479	1.35151	Yeast	2
Cluster 3658	1465569	-2.78815	Mycelium	2
Cluster 3658	1489118	2.2257	Yeast	2
Cluster 3664	1459153	-3.16353	Mycelium	2
Cluster 3664	1552520	3.7826	Yeast	2
Cluster 3690	1347194	1.01965	Yeast	2
Cluster 3690	1481182	-2.19413	Mycelium	2
Cluster 3706	1028062	2.48386	Yeast	2
Cluster 3706	1560227	-4.49041	Mycelium	2
Cluster 8599	1452879	-5.62769	Mycelium	2
Cluster 3714	1519746	-1.88427	Mycelium	2
Cluster 3714	1523846	2.5906	Yeast	2
Cluster 3728	1375416	4.37663	Yeast	2
Cluster 3728	1507096	-1.32864	Mycelium	2
Cluster 3767	1297275	-4.86588	Mycelium	2
Cluster 3767	1546923	1.55535	Yeast	2
Cluster 3772	1346996	1.70481	Yeast	2
Cluster 3772	1378819	-2.96545	Mycelium	2
Cluster 3811	1452967	2.81844	Yeast	2
Cluster 3811	1505093	-3.63437	Mycelium	2
Cluster 3839	1155573	-1.26276	Mycelium	2
Cluster 3839	1487335	4.88976	Yeast	2
Cluster 3912	1320690	5.57866	Yeast	2
Cluster 3912	1486677	-3.43618	Mycelium	2
Cluster 3914	1476756	1.92439	Yeast	2
Cluster 3914	1512391	-4.43558	Mycelium	2
Cluster 3919	1460103	2.59181	Yeast	2
Cluster 3919	1551388	-3.79001	Mycelium	2
Cluster 3980	1460392	1.92686	Yeast	2
Cluster 3980	1538726	-1.02645	Mycelium	2
Cluster 3989	1340734	-4.00112	Mycelium	2
Cluster 3989	1463224	2.68621	Yeast	2
Cluster 3996	1484652	3.66697	Yeast	2
Cluster 3996	1505569	-3.57199	Mycelium	2
Cluster 4054	1451962	1.85765	Yeast	2
Cluster 4054	1594914	-7.11295	Mycelium	2
Cluster 4133	1345490	3.16877	Yeast	2
Cluster 4133	1543787	-1.60841	Mycelium	2
Cluster 4135	1387688	1.69438	Yeast	2
Cluster 4135	1473027	-3.07848	Mycelium	2
Cluster 4152	1523399	-5.45752	Mycelium	2
Cluster 4152	1524855	2.50415	Yeast	2
Cluster 4165	1460235	-1.79532	Mycelium	2
Cluster 4165	1533732	2.60563	Yeast	2
Cluster 4200	1174567	-1.79273	Mycelium	2
Cluster 4200	1586570	1.11206	Yeast	2
Cluster 4207	1522255	-5.71531	Mycelium	2
Cluster 4207	1548496	2.1071	Yeast	2
Cluster 4437	1541961	1.57866	Yeast	2
Cluster 4251	1483176	2.40163	Yeast	2
Cluster 4251	1511399	-2.39203	Mycelium	2
Cluster 4273	1336606	-3.30566	Mycelium	2
Cluster 4273	1457570	3.22586	Yeast	2
Cluster 4276	1486572	1.27544	Yeast	2
Cluster 4276	1535589	-1.41941	Mycelium	2
Cluster 4287	1478867	-2.88284	Mycelium	2
Cluster 4287	1575428	3.30427	Yeast	2
Cluster 4300	1350315	1.18808	Yeast	2
Cluster 4300	1472387	-1.52444	Mycelium	2
Cluster 4338	1347260	-3.33931	Mycelium	2
Cluster 4338	1456495	1.21302	Yeast	2
Cluster 4347	1351014	7.25367	Yeast	2
Cluster 4347	1356832	-3.77088	Mycelium	2
Cluster 4356	1377358	1.68761	Yeast	2
Cluster 4356	1474222	-4.7326	Mycelium	2
Cluster 4371	1360381	-3.72278	Mycelium	2
Cluster 4371	1511887	1.02307	Yeast	2
Cluster 4400	1527242	-2.12081	Mycelium	2
Cluster 4400	1559481	2.30792	Yeast	2
Cluster 4414	1490098	-4.21859	Mycelium	2
Cluster 4414	1531545	5.56508	Yeast	2
Cluster 4427	1392393	4.42442	Yeast	2
Cluster 4427	1546038	-4.66126	Mycelium	2
Cluster 4437	1577550	-3.71978	Mycelium	2
Cluster 4459	1105385	8.22299	Yeast	2
Cluster 4459	1384657	-9.2979	Mycelium	2
Cluster 4491	1445552	1.88573	Yeast	2
Cluster 4491	1584601	-3.14134	Mycelium	2
Cluster 4534	1458539	3.01928	Yeast	2
Cluster 4534	1560762	-2.8665	Mycelium	2
Cluster 4536	1554832	2.03246	Yeast	2
Cluster 4536	1589968	-3.1548	Mycelium	2
Cluster 4571	1473028	-1.41295	Mycelium	2
Cluster 4571	1561991	3.40247	Yeast	2
Cluster 4604	1527123	1.77117	Yeast	2
Cluster 4609	1461375	7.13636	Yeast	2
Cluster 4609	1533506	-5.51824	Mycelium	2
Cluster 4628	1391804	-9.83049	Mycelium	2
Cluster 4628	1547769	4.98478	Yeast	2
Cluster 4667	1486451	-6.93805	Mycelium	2
Cluster 4667	1502892	3.90293	Yeast	2
Cluster 4679	1507851	6.14947	Yeast	2
Cluster 4679	1517094	-1.63698	Mycelium	2
Cluster 4680	1485652	-5.9694	Mycelium	2
Cluster 4680	1509277	3.71343	Yeast	2
Cluster 4716	1364807	1.64254	Yeast	2
Cluster 4716	1596525	-2.75742	Mycelium	2
Cluster 4773	1340510	-5.9247	Mycelium	2
Cluster 4773	1551875	1.3399	Yeast	2
Cluster 4850	1456501	2.03944	Yeast	2
Cluster 4850	1457029	-1.50305	Mycelium	2
Cluster 4882	1552269	1.59142	Yeast	2
Cluster 4882	1552631	-1.53189	Mycelium	2
Cluster 4906	1532256	-1.79845	Mycelium	2
Cluster 4906	1552914	1.72049	Yeast	2
Cluster 4924	1536843	-1.05322	Mycelium	2
Cluster 4924	1597832	3.4218	Yeast	2
Cluster 4950	1472235	-2.72352	Mycelium	2
Cluster 4950	1474735	1.98345	Yeast	2
Cluster 4976	1494428	2.39682	Yeast	2
Cluster 4976	1549515	-2.89386	Mycelium	2
Cluster 4988	1477627	5.12815	Yeast	2
Cluster 4988	1545368	-2.65616	Mycelium	2
Cluster 5059	1377941	-7.82748	Mycelium	2
Cluster 5059	1463345	3.33542	Yeast	2
Cluster 5080	1487511	1.41747	Yeast	2
Cluster 5080	1489644	-5.4772	Mycelium	2
Cluster 5087	1480169	2.66278	Yeast	2
Cluster 5087	1553049	-4.88709	Mycelium	2
Cluster 5143	1493575	2.46718	Yeast	2
Cluster 5143	1581619	-4.2344	Mycelium	2
Cluster 5160	1348925	-2.23526	Mycelium	2
Cluster 5160	1588698	1.68821	Yeast	2
Cluster 5190	1164687	2.91079	Yeast	2
Cluster 5190	1490791	-3.62325	Mycelium	2
Cluster 5240	1342386	-3.5616	Mycelium	2
Cluster 5240	1549996	2.48367	Yeast	2
Cluster 5372	1476967	-2.25723	Mycelium	2
Cluster 5372	1567237	2.48654	Yeast	2
Cluster 5374	1377833	6.44799	Yeast	2
Cluster 5374	1385030	-3.03789	Mycelium	2
Cluster 5387	1530017	4.35356	Yeast	2
Cluster 5387	1547090	-1.99271	Mycelium	2
Cluster 5466	1375628	4.69966	Yeast	2
Cluster 5466	1463387	-10.3051	Mycelium	2
Cluster 5494	1470497	-5.3549	Mycelium	2
Cluster 5494	1478245	2.5567	Yeast	2
Cluster 5506	1382908	5.45935	Yeast	2
Cluster 5506	1517246	-1.2438	Mycelium	2
Cluster 5530	1467316	-1.12565	Mycelium	2
Cluster 5530	1491188	1.81905	Yeast	2
Cluster 5603	1479860	-2.88864	Mycelium	2
Cluster 5603	1555759	1.59878	Yeast	2
Cluster 5612	1507113	-2.53941	Mycelium	2
Cluster 5612	1537650	1.70199	Yeast	2
Cluster 5619	1375711	-2.77157	Mycelium	2
Cluster 5619	1542794	6.32485	Yeast	2
Cluster 5652	1362180	3.69046	Yeast	2
Cluster 5652	1557103	-3.78445	Mycelium	2
Cluster 5687	1359117	-9.40348	Mycelium	2
Cluster 5687	1461199	4.20248	Yeast	2
Cluster 5703	1521613	1.61753	Yeast	2
Cluster 5703	1538719	-2.4123	Mycelium	2
Cluster 5719	1388182	3.87015	Yeast	2
Cluster 5719	1516830	-1.07586	Mycelium	2
Cluster 5734	1445686	-5.97312	Mycelium	2
Cluster 5734	1492890	6.00258	Yeast	2
Cluster 5744	1510844	-3.47239	Mycelium	2
Cluster 5744	1512028	2.29454	Yeast	2
Cluster 5777	1485547	-1.38908	Mycelium	2
Cluster 5777	1585857	2.24699	Yeast	2
Cluster 5820	1489540	-4.11365	Mycelium	2
Cluster 5820	1489541	1.74826	Yeast	2
Cluster 5830	1455213	1.09494	Yeast	2
Cluster 5830	1537939	-1.45232	Mycelium	2
Cluster 5851	1350746	-3.18898	Mycelium	2
Cluster 5851	1453570	2.3251	Yeast	2
Cluster 5895	1507670	-2.37125	Mycelium	2
Cluster 5895	1545523	1.44701	Yeast	2
Cluster 5901	1516659	1.65575	Yeast	2
Cluster 5901	1523172	-1.51896	Mycelium	2
Cluster 5930	1368260	4.47366	Yeast	2
Cluster 5930	1456299	-1.06505	Mycelium	2
Cluster 5976	1496258	-2.18217	Mycelium	2
Cluster 5976	1550041	2.6145	Yeast	2
Cluster 6031	1519635	3.72583	Yeast	2
Cluster 6031	1548161	-1.0833	Mycelium	2
Cluster 6034	1353562	-2.39309	Mycelium	2
Cluster 6034	1560911	4.3054	Yeast	2
Cluster 6043	1467686	1.32747	Yeast	2
Cluster 6043	1530811	-4.59004	Mycelium	2
Cluster 6048	1458765	-1.18396	Mycelium	2
Cluster 6048	1507076	1.63619	Yeast	2
Cluster 6090	1501647	1.51625	Yeast	2
Cluster 6090	1547714	-1.1851	Mycelium	2
Cluster 6095	1523940	1.92273	Yeast	2
Cluster 6105	1347388	-7.12549	Mycelium	2
Cluster 6105	1486989	6.71207	Yeast	2
Cluster 6134	1541025	1.45024	Yeast	2
Cluster 6134	1593794	-12.6953	Mycelium	2
Cluster 6139	1550624	-2.6619	Mycelium	2
Cluster 6139	1551656	1.30428	Yeast	2
Cluster 6195	1514229	3.11267	Yeast	2
Cluster 6195	1527832	-5.7674	Mycelium	2
Cluster 6275	1147477	-5.61006	Mycelium	2
Cluster 6275	1453278	2.22585	Yeast	2
Cluster 6325	1386661	-4.63755	Mycelium	2
Cluster 6325	1409043	3.29556	Yeast	2
Cluster 6378	1366033	1.02412	Yeast	2
Cluster 6378	1530633	-1.29676	Mycelium	2
Cluster 6439	1585418	1.79063	Yeast	2
Cluster 6439	1597699	-2.39225	Mycelium	2
Cluster 6516	1500038	-4.9391	Mycelium	2
Cluster 6516	1538442	2.22494	Yeast	2
Cluster 6541	1579262	2.2209	Yeast	2
Cluster 6541	1579272	-3.67968	Mycelium	2
Cluster 6570	1492285	-2.3634	Mycelium	2
Cluster 6570	1530576	3.39573	Yeast	2
Cluster 6644	1525430	2.3088	Yeast	2
Cluster 6644	1544080	-2.4673	Mycelium	2
Cluster 6654	1455014	1.72505	Yeast	2
Cluster 6654	1487364	-1.61783	Mycelium	2
Cluster 6745	1505420	2.85397	Yeast	2
Cluster 6745	1509285	-4.19022	Mycelium	2
Cluster 6773	1517659	-3.04149	Mycelium	2
Cluster 6773	1527921	2.29055	Yeast	2
Cluster 6866	1438176	-2.40647	Mycelium	2
Cluster 6866	1566726	1.86829	Yeast	2
Cluster 8265	1502884	-12.3758	Mycelium	2
Cluster 6894	1366376	-3.38502	Mycelium	2
Cluster 6894	1480095	3.37315	Yeast	2
Cluster 6913	1483431	-4.57048	Mycelium	2
Cluster 6913	1526639	2.00705	Yeast	2
Cluster 7214	1533010	-4.76458	Mycelium	2
Cluster 6947	1372410	-2.82504	Mycelium	2
Cluster 6947	1490711	6.62849	Yeast	2
Cluster 6964	1322491	-5.89153	Mycelium	2
Cluster 6964	1566443	2.04763	Yeast	2
Cluster 6988	1494898	-1.72729	Mycelium	2
Cluster 6988	1528186	4.32416	Yeast	2
Cluster 7002	1351494	-7.69949	Mycelium	2
Cluster 7002	1482142	3.09219	Yeast	2
Cluster 7012	1380523	-9.48933	Mycelium	2
Cluster 7012	1464326	6.6365	Yeast	2
Cluster 7044	1364265	-3.79359	Mycelium	2
Cluster 7044	1510732	3.87884	Yeast	2
Cluster 7111	1479670	2.15335	Yeast	2
Cluster 7111	1512425	-2.13353	Mycelium	2
Cluster 7146	1038425	3.58029	Yeast	2
Cluster 7146	1390506	-6.12785	Mycelium	2
Cluster 7154	1451751	1.53624	Yeast	2
Cluster 7154	1514522	-1.39096	Mycelium	2
Cluster 7214	1521542	2.67945	Yeast	2
Cluster 7244	1360018	-1.12517	Mycelium	2
Cluster 7244	1540953	1.87719	Yeast	2
Cluster 7333	1525309	5.20306	Yeast	2
Cluster 7326	1459184	-2.54364	Mycelium	2
Cluster 7326	1509434	1.24165	Yeast	2
Cluster 7333	1333955	-6.50286	Mycelium	2
Cluster 7410	1476934	11.73	Yeast	2
Cluster 7410	1515134	-4.42384	Mycelium	2
Cluster 7420	1447031	3.59791	Yeast	2
Cluster 7420	1545787	-4.71285	Mycelium	2
Cluster 7440	1510284	2.46393	Yeast	2
Cluster 7440	1594999	-1.35123	Mycelium	2
Cluster 7490	1530364	4.30946	Yeast	2
Cluster 7490	1588316	-1.92008	Mycelium	2
Cluster 7526	1322359	-13.4736	Mycelium	2
Cluster 7526	1536721	2.10404	Yeast	2
Cluster 7536	1456584	1.82546	Yeast	2
Cluster 7536	1489534	-6.03233	Mycelium	2
Cluster 7546	1048581	-2.61713	Mycelium	2
Cluster 7546	1380607	3.94234	Yeast	2
Cluster 7551	1483321	-1.93607	Mycelium	2
Cluster 7551	1502484	2.42438	Yeast	2
Cluster 7643	1450353	-3.74775	Mycelium	2
Cluster 7643	1520149	4.35381	Yeast	2
Cluster 7705	1349830	1.83281	Yeast	2
Cluster 7705	1495263	-2.59737	Mycelium	2
Cluster 7806	1525758	-2.39376	Mycelium	2
Cluster 7806	1600344	1.4548	Yeast	2
Cluster 7811	1389743	1.2933	Yeast	2
Cluster 7811	1483861	-1.80241	Mycelium	2
Cluster 7830	1521825	6.1877	Yeast	2
Cluster 7830	1536224	-4.71008	Mycelium	2
Cluster 7858	1465848	5.07975	Yeast	2
Cluster 7858	1549270	-2.10787	Mycelium	2
Cluster 7863	1455299	-4.34946	Mycelium	2
Cluster 7863	1546320	6.33402	Yeast	2
Cluster 7876	1472491	1.04724	Yeast	2
Cluster 7876	1555080	-3.6776	Mycelium	2
Cluster 7956	1415184	1.99536	Yeast	2
Cluster 7956	1501457	-3.15452	Mycelium	2
Cluster 7963	1376807	4.19358	Yeast	2
Cluster 7963	1518332	-2.1787	Mycelium	2
Cluster 8006	1481123	4.0116	Yeast	2
Cluster 8051	1453995	2.39703	Yeast	2
Cluster 8051	1545582	-4.79331	Mycelium	2
Cluster 8112	1502578	-1.96552	Mycelium	2
Cluster 8112	1555490	3.21862	Yeast	2
Cluster 8228	1465353	5.17715	Yeast	2
Cluster 8228	1528447	-1.85243	Mycelium	2
Cluster 8239	1538215	4.73206	Yeast	2
Cluster 8239	1548308	-1.49866	Mycelium	2
Cluster 8255	1394518	4.03106	Yeast	2
Cluster 8255	1488887	-4.54336	Mycelium	2
Cluster 8265	1506480	10.3019	Yeast	2
Cluster 8332	1430444	2.99205	Yeast	2
Cluster 8332	1556604	-2.27072	Mycelium	2
Cluster 8369	1340809	-1.20031	Mycelium	2
Cluster 8369	1543401	2.43129	Yeast	2
Cluster 8389	1513364	4.87861	Yeast	2
Cluster 8389	1514594	-1.54684	Mycelium	2
Cluster 8390	1359901	-2.75034	Mycelium	2
Cluster 8390	1534524	2.73509	Yeast	2
Cluster 8476	1350382	5.22853	Yeast	2
Cluster 8476	1475750	-1.70652	Mycelium	2
Cluster 8527	1447584	-4.66864	Mycelium	2
Cluster 8527	1488994	2.70034	Yeast	2
Cluster 8550	1473711	4.26373	Yeast	2
Cluster 8550	1553141	-10.6246	Mycelium	2
Cluster 8599	1031962	7.54252	Yeast	2
Cluster 8632	1445903	-5.95252	Mycelium	2
Cluster 8632	1459427	1.37041	Yeast	2
Cluster 8672	1469527	-3.12297	Mycelium	2
Cluster 8712	1472920	-2.66502	Mycelium	2
Cluster 8712	1530351	1.63203	Yeast	2
Cluster 8778	1483557	-4.05741	Mycelium	2
Cluster 8778	1509295	4.70135	Yeast	2
Cluster 8919	1482139	4.54596	Yeast	2
Cluster 8919	1506022	-2.04557	Mycelium	2
Cluster 8938	1532156	5.18639	Yeast	2
Cluster 8938	1558964	-1.34777	Mycelium	2
Cluster 155	1007498	-3.50804	Mycelium	3
Cluster 155	1372666	-3.01124	Mycelium	3
Cluster 155	1579918	2.44585	Yeast	3
Cluster 487	1306538	-4.73531	Mycelium	3
Cluster 487	1317116	1.24544	Yeast	3
Cluster 487	1578093	-2.01166	Mycelium	3
Cluster 569	1320893	-1.75193	Mycelium	3
Cluster 569	1455521	-4.76545	Mycelium	3
Cluster 569	1596585	2.82086	Yeast	3
Cluster 631	1446638	9.06782	Yeast	3
Cluster 631	1453519	1.33199	Yeast	3
Cluster 631	1569449	-5.95066	Mycelium	3
Cluster 703	1321135	-2.21348	Mycelium	3
Cluster 703	1362444	-5.69461	Mycelium	3
Cluster 703	1554895	1.40792	Yeast	3
Cluster 749	1364659	2.95855	Yeast	3
Cluster 749	1388043	-2.02569	Mycelium	3
Cluster 749	1593045	-2.04818	Mycelium	3
Cluster 800	1349249	-1.37171	Mycelium	3
Cluster 800	1466482	2.60006	Yeast	3
Cluster 800	1477449	-4.29368	Mycelium	3
Cluster 826	1491096	-1.34675	Mycelium	3
Cluster 826	1520494	1.71169	Yeast	3
Cluster 826	1548700	-3.34603	Mycelium	3
Cluster 1008	1588464	-3.23462	Mycelium	3
Cluster 960	1539711	5.21753	Yeast	3
Cluster 960	1547071	5.06032	Yeast	3
Cluster 960	1599215	-5.0307	Mycelium	3
Cluster 1008	1496261	-1.99151	Mycelium	3
Cluster 1008	1540227	1.21548	Yeast	3
Cluster 3514	1482099	3.57898	Yeast	3
Cluster 1220	1394287	1.00763	Yeast	3
Cluster 1220	1563904	1.0189	Yeast	3
Cluster 1220	1593246	-7.97019	Mycelium	3
Cluster 1232	1395234	-3.93187	Mycelium	3
Cluster 1232	1482594	4.81691	Yeast	3
Cluster 1232	1499189	2.97971	Yeast	3
Cluster 1357	1472727	-3.13335	Mycelium	3
Cluster 1357	1501953	2.22017	Yeast	3
Cluster 1357	1536710	2.28932	Yeast	3
Cluster 1455	1430337	2.27021	Yeast	3
Cluster 1455	1526624	-3.12366	Mycelium	3
Cluster 1455	1540106	-3.86722	Mycelium	3
Cluster 1525	1483491	-3.71961	Mycelium	3
Cluster 1525	1496393	2.26938	Yeast	3
Cluster 1525	1547437	1.53916	Yeast	3
Cluster 1558	1387328	-5.98811	Mycelium	3
Cluster 1558	1481893	-8.85915	Mycelium	3
Cluster 1558	1601333	2.47595	Yeast	3
Cluster 1582	1438866	-11.0813	Mycelium	3
Cluster 1582	1529474	7.97838	Yeast	3
Cluster 1582	1601124	-2.91272	Mycelium	3
Cluster 1707	1472998	-1.76035	Mycelium	3
Cluster 1707	1488334	2.36204	Yeast	3
Cluster 1707	1557630	2.12054	Yeast	3
Cluster 1828	1509200	-7.80433	Mycelium	3
Cluster 1828	1518111	1.81407	Yeast	3
Cluster 1828	1555909	-7.14202	Mycelium	3
Cluster 1908	1456020	-4.11487	Mycelium	3
Cluster 1908	1483768	3.38703	Yeast	3
Cluster 1908	1501922	-6.64011	Mycelium	3
Cluster 2108	1547878	-2.39227	Mycelium	3
Cluster 2108	1552537	-2.6328	Mycelium	3
Cluster 2108	1559769	1.50976	Yeast	3
Cluster 2111	1493368	1.39481	Yeast	3
Cluster 2111	1542413	3.10125	Yeast	3
Cluster 2111	1557504	-3.91929	Mycelium	3
Cluster 2318	1365018	-4.87595	Mycelium	3
Cluster 2318	1470073	3.94962	Yeast	3
Cluster 2318	1511166	-1.70931	Mycelium	3
Cluster 2451	1355173	2.12026	Yeast	3
Cluster 2451	1456274	-7.08056	Mycelium	3
Cluster 2451	1502284	-1.43493	Mycelium	3
Cluster 2455	1355503	3.07273	Yeast	3
Cluster 2455	1533515	-5.46427	Mycelium	3
Cluster 2455	1559204	9.26788	Yeast	3
Cluster 2616	1132811	-9.68707	Mycelium	3
Cluster 2616	1475150	-2.53658	Mycelium	3
Cluster 2616	1556499	2.03309	Yeast	3
Cluster 2644	1491589	3.8618	Yeast	3
Cluster 2644	1516366	-8.25848	Mycelium	3
Cluster 2644	1586609	-10.5556	Mycelium	3
Cluster 2682	1334309	-4.59143	Mycelium	3
Cluster 2682	1505395	2.07874	Yeast	3
Cluster 2682	1509912	-3.70973	Mycelium	3
Cluster 2829	1485755	-6.56286	Mycelium	3
Cluster 2829	1517029	6.80382	Yeast	3
Cluster 2829	1551561	7.04974	Yeast	3
Cluster 2836	1457928	7.41633	Yeast	3
Cluster 2836	1493745	1.78268	Yeast	3
Cluster 2836	1595848	-1.93574	Mycelium	3
Cluster 2865	1478980	1.69741	Yeast	3
Cluster 2865	1486827	-2.12839	Mycelium	3
Cluster 2865	1556822	1.38432	Yeast	3
Cluster 3006	1452924	6.69155	Yeast	3
Cluster 2899	1465320	-1.51507	Mycelium	3
Cluster 2899	1471652	4.36691	Yeast	3
Cluster 2899	1493740	3.20139	Yeast	3
Cluster 2919	1367627	-7.32466	Mycelium	3
Cluster 2919	1369295	3.7483	Yeast	3
Cluster 2919	1531873	-6.13416	Mycelium	3
Cluster 2922	1391134	1.91679	Yeast	3
Cluster 2922	1466174	-6.50809	Mycelium	3
Cluster 2922	1535848	4.45164	Yeast	3
Cluster 3211	1362921	-6.32017	Mycelium	3
Cluster 3211	1410908	2.23148	Yeast	3
Cluster 2951	1393427	-4.99444	Mycelium	3
Cluster 2951	1505922	2.87279	Yeast	3
Cluster 2951	1522466	5.96036	Yeast	3
Cluster 3006	1445105	-2.42284	Mycelium	3
Cluster 3006	1594502	2.17605	Yeast	3
Cluster 3185	1444712	-9.35763	Mycelium	3
Cluster 3185	1489324	-5.6795	Mycelium	3
Cluster 3185	1586768	1.48316	Yeast	3
Cluster 3211	1575816	-7.78029	Mycelium	3
Cluster 3251	1476868	-2.77758	Mycelium	3
Cluster 3251	1497176	-5.1055	Mycelium	3
Cluster 3251	1530662	3.83336	Yeast	3
Cluster 3293	1482916	-2.23396	Mycelium	3
Cluster 3293	1496500	1.55834	Yeast	3
Cluster 4643	1548828	-3.40004	Mycelium	3
Cluster 3293	1555151	-1.48447	Mycelium	3
Cluster 3514	1479391	3.04872	Yeast	3
Cluster 3514	1583435	-3.70461	Mycelium	3
Cluster 3749	1521125	2.56949	Yeast	3
Cluster 3749	1532456	-1.2886	Mycelium	3
Cluster 3749	1535810	2.38009	Yeast	3
Cluster 3758	1459510	-1.50318	Mycelium	3
Cluster 3758	1464941	2.08335	Yeast	3
Cluster 3758	1473818	1.65209	Yeast	3
Cluster 3763	1477816	4.22591	Yeast	3
Cluster 3763	1520259	-1.82449	Mycelium	3
Cluster 3763	1527882	3.04826	Yeast	3
Cluster 3847	1454879	-2.3209	Mycelium	3
Cluster 3847	1522662	2.54877	Yeast	3
Cluster 3847	1527620	-6.69553	Mycelium	3
Cluster 3930	1353724	-3.23807	Mycelium	3
Cluster 3930	1451108	1.53708	Yeast	3
Cluster 3930	1525626	5.48441	Yeast	3
Cluster 3951	1466588	1.2641	Yeast	3
Cluster 3951	1468017	2.10241	Yeast	3
Cluster 3951	1570125	-5.49568	Mycelium	3
Cluster 3997	1490368	-2.8411	Mycelium	3
Cluster 3997	1495315	-1.39112	Mycelium	3
Cluster 3997	1539234	2.85235	Yeast	3
Cluster 4142	1466161	-7.52611	Mycelium	3
Cluster 4142	1531359	4.59152	Yeast	3
Cluster 4142	1549906	2.21731	Yeast	3
Cluster 4302	1445953	-5.94659	Mycelium	3
Cluster 4302	1483128	-4.98682	Mycelium	3
Cluster 4302	1540408	3.83728	Yeast	3
Cluster 4342	1390986	1.98799	Yeast	3
Cluster 4342	1491679	-5.07526	Mycelium	3
Cluster 4342	1503373	-1.32138	Mycelium	3
Cluster 4358	1466557	-3.48046	Mycelium	3
Cluster 4358	1486952	4.38233	Yeast	3
Cluster 4358	1490261	4.17978	Yeast	3
Cluster 4600	1445399	-7.31633	Mycelium	3
Cluster 4600	1496254	-4.12946	Mycelium	3
Cluster 4600	1532205	2.30651	Yeast	3
Cluster 4639	1476439	2.17807	Yeast	3
Cluster 4639	1509288	1.96079	Yeast	3
Cluster 4639	1518335	-9.42122	Mycelium	3
Cluster 4643	1452026	2.4306	Yeast	3
Cluster 4643	1556444	1.62484	Yeast	3
Cluster 4731	1448381	-1.49857	Mycelium	3
Cluster 4731	1563396	-3.75091	Mycelium	3
Cluster 4731	1600178	2.23764	Yeast	3
Cluster 4763	1501715	3.29469	Yeast	3
Cluster 4763	1525601	2.5383	Yeast	3
Cluster 4763	1542807	-1.32903	Mycelium	3
Cluster 4784	1372558	-8.14467	Mycelium	3
Cluster 4784	1387748	2.0136	Yeast	3
Cluster 4784	1442365	5.22404	Yeast	3
Cluster 4842	1351491	1.43574	Yeast	3
Cluster 4842	1442409	-2.76305	Mycelium	3
Cluster 4842	1541865	-3.21023	Mycelium	3
Cluster 5017	1374170	2.47758	Yeast	3
Cluster 5017	1378134	-5.27369	Mycelium	3
Cluster 5017	1463347	2.5205	Yeast	3
Cluster 5032	1462426	-3.69193	Mycelium	3
Cluster 5032	1468448	-3.98815	Mycelium	3
Cluster 5032	1482791	2.59753	Yeast	3
Cluster 5092	1443685	-7.73539	Mycelium	3
Cluster 5092	1547727	1.76197	Yeast	3
Cluster 5092	1591401	-4.26538	Mycelium	3
Cluster 5239	1509366	2.1905	Yeast	3
Cluster 5239	1518454	-2.42956	Mycelium	3
Cluster 5239	1540366	3.76455	Yeast	3
Cluster 5263	1381759	-2.30606	Mycelium	3
Cluster 5263	1473647	3.3471	Yeast	3
Cluster 5263	1557002	1.41954	Yeast	3
Cluster 5267	1374861	-2.41468	Mycelium	3
Cluster 5267	1411149	3.11315	Yeast	3
Cluster 5267	1471990	-2.88729	Mycelium	3
Cluster 5271	1376086	-5.16036	Mycelium	3
Cluster 5271	1496716	2.86123	Yeast	3
Cluster 5271	1512902	-9.77909	Mycelium	3
Cluster 5280	1455994	-2.34511	Mycelium	3
Cluster 5280	1512988	-3.08304	Mycelium	3
Cluster 5280	1545045	1.71796	Yeast	3
Cluster 5343	1409162	5.34249	Yeast	3
Cluster 5343	1560177	-6.60609	Mycelium	3
Cluster 5343	1583950	2.22078	Yeast	3
Cluster 5451	1468027	4.34743	Yeast	3
Cluster 5451	1485268	2.00511	Yeast	3
Cluster 5451	1601490	-5.48456	Mycelium	3
Cluster 5452	1393893	1.77191	Yeast	3
Cluster 5452	1486463	1.19676	Yeast	3
Cluster 5452	1486469	-7.76404	Mycelium	3
Cluster 5557	1032959	2.30258	Yeast	3
Cluster 5557	1410782	-3.26691	Mycelium	3
Cluster 5557	1560228	-3.39332	Mycelium	3
Cluster 5617	1485862	-8.43765	Mycelium	3
Cluster 5617	1530795	-7.17216	Mycelium	3
Cluster 5617	1547995	1.6361	Yeast	3
Cluster 6012	1461124	3.87586	Yeast	3
Cluster 6012	1586292	-4.19648	Mycelium	3
Cluster 6012	1594672	6.0162	Yeast	3
Cluster 6236	1459411	2.82694	Yeast	3
Cluster 6236	1476546	2.71899	Yeast	3
Cluster 6236	1489870	-3.33269	Mycelium	3
Cluster 6239	1431891	2.98477	Yeast	3
Cluster 6239	1497643	-9.5716	Mycelium	3
Cluster 6239	1523296	-11.952	Mycelium	3
Cluster 6395	1128474	5.07515	Yeast	3
Cluster 6395	1355789	-2.36122	Mycelium	3
Cluster 6395	1518168	-8.22648	Mycelium	3
Cluster 6499	1460308	-4.96539	Mycelium	3
Cluster 6499	1486420	-2.26592	Mycelium	3
Cluster 6499	1528797	1.01001	Yeast	3
Cluster 6564	1362740	1.1166	Yeast	3
Cluster 6564	1396611	-5.13549	Mycelium	3
Cluster 6564	1522452	2.40152	Yeast	3
Cluster 6753	1455204	2.78502	Yeast	3
Cluster 6753	1463006	2.66695	Yeast	3
Cluster 6753	1600216	-1.34093	Mycelium	3
Cluster 7380	1492673	-1.05862	Mycelium	3
Cluster 7380	1500174	2.11994	Yeast	3
Cluster 7380	1583551	-8.2149	Mycelium	3
Cluster 7429	1139283	1.05676	Yeast	3
Cluster 7429	1392141	1.31607	Yeast	3
Cluster 7429	1532434	-1.54609	Mycelium	3
Cluster 7532	1474024	-4.7641	Mycelium	3
Cluster 7532	1567658	-7.30853	Mycelium	3
Cluster 7532	1594666	1.61596	Yeast	3
Cluster 8037	1414394	-1.72723	Mycelium	3
Cluster 8037	1434564	-8.68048	Mycelium	3
Cluster 8037	1446729	3.52956	Yeast	3
Cluster 8173	1496105	1.67356	Yeast	3
Cluster 8173	1512079	-1.06739	Mycelium	3
Cluster 8173	1530624	-1.27969	Mycelium	3
Cluster 8187	1468525	-1.14595	Mycelium	3
Cluster 8187	1477137	-3.52128	Mycelium	3
Cluster 8187	1546961	1.94254	Yeast	3
Cluster 8351	1477157	-2.88454	Mycelium	3
Cluster 8351	1520795	-2.14238	Mycelium	3
Cluster 8351	1520832	1.86539	Yeast	3
Cluster 8363	1363003	2.4723	Yeast	3
Cluster 8363	1474498	-2.48365	Mycelium	3
Cluster 8363	1499526	1.18817	Yeast	3
Cluster 8666	1557658	-8.40642	Mycelium	3
Cluster 8543	1375392	-1.10595	Mycelium	3
Cluster 8543	1477142	-2.01598	Mycelium	3
Cluster 8543	1520813	1.31821	Yeast	3
Cluster 8666	1476551	-2.94697	Mycelium	3
Cluster 8666	1546030	1.36218	Yeast	3
Cluster 8965	1463117	1.90669	Yeast	3
Cluster 8965	1467340	-1.07038	Mycelium	3
Cluster 8965	1523934	2.74683	Yeast	3
Cluster 48	1349367	-6.94373	Mycelium	4
Cluster 48	1489737	-6.15426	Mycelium	4
Cluster 48	1555346	-2.02655	Mycelium	4
Cluster 48	1594173	1.77805	Yeast	4
Cluster 134	1465337	-9.89636	Mycelium	4
Cluster 134	1530196	-7.88001	Mycelium	4
Cluster 134	1541263	-7.63794	Mycelium	4
Cluster 134	1567453	1.95592	Yeast	4
Cluster 425	1443910	-4.37559	Mycelium	4
Cluster 425	1487853	-2.75926	Mycelium	4
Cluster 425	1543667	-4.05709	Mycelium	4
Cluster 425	1546913	3.40781	Yeast	4
Cluster 432	1493422	-7.0608	Mycelium	4
Cluster 432	1493435	-1.16844	Mycelium	4
Cluster 432	1517486	3.22377	Yeast	4
Cluster 432	1595114	1.51231	Yeast	4
Cluster 1772	1453933	-1.47041	Mycelium	4
Cluster 1772	1533977	3.02375	Yeast	4
Cluster 501	1465331	-2.13705	Mycelium	4
Cluster 501	1490560	1.90042	Yeast	4
Cluster 501	1496003	2.61119	Yeast	4
Cluster 501	1595514	1.11522	Yeast	4
Cluster 539	1457807	-3.46041	Mycelium	4
Cluster 539	1490469	1.21726	Yeast	4
Cluster 539	1533310	3.86173	Yeast	4
Cluster 539	1600016	2.00148	Yeast	4
Cluster 583	1453422	2.27149	Yeast	4
Cluster 583	1474781	1.95993	Yeast	4
Cluster 583	1481205	2.45931	Yeast	4
Cluster 583	1506373	-1.96683	Mycelium	4
Cluster 1141	1447512	-4.25016	Mycelium	4
Cluster 1141	1505529	-3.05235	Mycelium	4
Cluster 1141	1528536	4.06845	Yeast	4
Cluster 1141	1565542	1.59534	Yeast	4
Cluster 1313	1320654	-8.45926	Mycelium	4
Cluster 1313	1368368	-1.33319	Mycelium	4
Cluster 1313	1393706	1.57538	Yeast	4
Cluster 1313	1503358	1.8366	Yeast	4
Cluster 1402	1481969	1.72905	Yeast	4
Cluster 1402	1507485	1.09982	Yeast	4
Cluster 1402	1517478	-7.33124	Mycelium	4
Cluster 1402	1592410	1.26538	Yeast	4
Cluster 1467	1511339	-4.27262	Mycelium	4
Cluster 1467	1516150	-1.87782	Mycelium	4
Cluster 1467	1593020	1.30518	Yeast	4
Cluster 1467	1368883	-1.98764	Mycelium	4
Cluster 1505	1431978	-1.14355	Mycelium	4
Cluster 1505	1491420	2.38114	Yeast	4
Cluster 1505	1535886	1.63174	Yeast	4
Cluster 1505	1544182	3.89484	Yeast	4
Cluster 1516	1364318	-7.21267	Mycelium	4
Cluster 1516	1485225	-1.46777	Mycelium	4
Cluster 1516	1500553	-1.68943	Mycelium	4
Cluster 1516	1521962	1.72125	Yeast	4
Cluster 1520	1453869	1.19516	Yeast	4
Cluster 1520	1464200	3.31997	Yeast	4
Cluster 1520	1513041	-8.16414	Mycelium	4
Cluster 1520	1531886	1.50102	Yeast	4
Cluster 1587	1509737	-1.36326	Mycelium	4
Cluster 1587	1517680	3.83204	Yeast	4
Cluster 1587	1535679	3.90083	Yeast	4
Cluster 1587	1540059	7.50861	Yeast	4
Cluster 1722	1063740	-2.93471	Mycelium	4
Cluster 1722	1338060	-4.3362	Mycelium	4
Cluster 1722	1465994	1.66917	Yeast	4
Cluster 1722	1579909	-3.77278	Mycelium	4
Cluster 1772	1468096	-2.66703	Mycelium	4
Cluster 1772	1471793	1.65291	Yeast	4
Cluster 1787	1384361	-2.18192	Mycelium	4
Cluster 1787	1498893	5.61713	Yeast	4
Cluster 1787	1500814	1.03374	Yeast	4
Cluster 1787	1532027	-1.01546	Mycelium	4
Cluster 1947	1375039	1.55258	Yeast	4
Cluster 1947	1378100	-3.12679	Mycelium	4
Cluster 1947	1537495	2.9354	Yeast	4
Cluster 1947	1540221	1.51205	Yeast	4
Cluster 2738	1476501	-4.17603	Mycelium	4
Cluster 2750	1438826	-6.1728	Mycelium	4
Cluster 2459	1446476	6.37406	Yeast	4
Cluster 2459	1477986	2.32322	Yeast	4
Cluster 2459	1507313	1.90434	Yeast	4
Cluster 2459	1537474	-1.31931	Mycelium	4
Cluster 8444	1557120	3.23591	Yeast	4
Cluster 2738	1459363	4.3111	Yeast	4
Cluster 2738	1492358	-9.75086	Mycelium	4
Cluster 2738	1519928	3.13291	Yeast	4
Cluster 2750	1345133	-5.47903	Mycelium	4
Cluster 2750	1561927	2.16258	Yeast	4
Cluster 2750	1580489	3.96168	Yeast	4
Cluster 2826	1328400	-1.85932	Mycelium	4
Cluster 2826	1463369	-1.73064	Mycelium	4
Cluster 2826	1496694	4.36212	Yeast	4
Cluster 2826	1502256	-8.29824	Mycelium	4
Cluster 2851	1167480	-4.37155	Mycelium	4
Cluster 2851	1491480	-3.44908	Mycelium	4
Cluster 2851	1513955	2.36349	Yeast	4
Cluster 2851	1579641	-2.83455	Mycelium	4
Cluster 3164	1392746	1.37004	Yeast	4
Cluster 3164	1519217	-1.01765	Mycelium	4
Cluster 3164	1520455	-6.91058	Mycelium	4
Cluster 3164	1545262	-3.85519	Mycelium	4
Cluster 3244	1446347	-3.69633	Mycelium	4
Cluster 3244	1472605	2.42808	Yeast	4
Cluster 3244	1489186	1.35322	Yeast	4
Cluster 3244	1597682	-7.64276	Mycelium	4
Cluster 3290	1471701	2.16268	Yeast	4
Cluster 3290	1514758	-5.142	Mycelium	4
Cluster 3290	1514784	-9.62035	Mycelium	4
Cluster 3290	1532607	-3.97515	Mycelium	4
Cluster 3420	1483598	1.42217	Yeast	4
Cluster 3420	1517646	-1.94716	Mycelium	4
Cluster 3420	1522140	3.74429	Yeast	4
Cluster 3420	1540425	-1.26039	Mycelium	4
Cluster 3826	1501516	-1.46667	Mycelium	4
Cluster 3826	1505043	3.34504	Yeast	4
Cluster 3826	1547543	2.83079	Yeast	4
Cluster 3826	1590905	1.18782	Yeast	4
Cluster 4116	1386776	-1.49808	Mycelium	4
Cluster 4116	1474136	1.31396	Yeast	4
Cluster 4116	1475350	1.79127	Yeast	4
Cluster 4116	1510839	3.13272	Yeast	4
Cluster 4260	1334600	-3.27488	Mycelium	4
Cluster 4260	1343381	-5.92658	Mycelium	4
Cluster 4260	1466549	1.80417	Yeast	4
Cluster 4260	1472258	-3.99449	Mycelium	4
Cluster 4378	1360710	2.17865	Yeast	4
Cluster 4378	1382080	-4.54649	Mycelium	4
Cluster 4378	1448086	-1.82529	Mycelium	4
Cluster 4378	1459906	2.69927	Yeast	4
Cluster 4768	1368755	4.05394	Yeast	4
Cluster 4768	1388400	-6.84778	Mycelium	4
Cluster 4768	1562358	4.5971	Yeast	4
Cluster 4768	1579453	-5.24957	Mycelium	4
Cluster 5184	1349300	2.4569	Yeast	4
Cluster 5184	1456955	2.71136	Yeast	4
Cluster 5184	1469624	-3.3502	Mycelium	4
Cluster 5184	1520784	2.76333	Yeast	4
Cluster 5226	1451573	5.96245	Yeast	4
Cluster 5226	1454113	-3.01914	Mycelium	4
Cluster 5226	1505953	-1.66721	Mycelium	4
Cluster 5226	1523405	1.49177	Yeast	4
Cluster 5408	1368451	4.13116	Yeast	4
Cluster 5408	1517791	1.07694	Yeast	4
Cluster 5408	1517945	1.30652	Yeast	4
Cluster 5408	1586495	-3.81232	Mycelium	4
Cluster 6346	1481253	2.40569	Yeast	4
Cluster 6346	1499023	-1.98879	Mycelium	4
Cluster 6346	1512307	3.11363	Yeast	4
Cluster 6346	1519546	3.10835	Yeast	4
Cluster 8224	1347359	2.91622	Yeast	4
Cluster 8224	1378111	-1.08331	Mycelium	4
Cluster 8224	1378784	2.6203	Yeast	4
Cluster 8224	1432579	2.70467	Yeast	4
Cluster 8677	1363436	-10.0237	Mycelium	4
Cluster 8237	1477151	-2.45465	Mycelium	4
Cluster 8237	1497033	-2.16788	Mycelium	4
Cluster 8237	1520803	-1.59639	Mycelium	4
Cluster 8237	1520824	1.52418	Yeast	4
Cluster 8444	1359075	-1.57151	Mycelium	4
Cluster 8444	1527735	-1.30018	Mycelium	4
Cluster 8444	1594967	4.98081	Yeast	4
Cluster 8677	1484025	-2.44873	Mycelium	4
Cluster 8677	1520693	-2.7328	Mycelium	4
Cluster 8677	1537699	4.48382	Yeast	4
Cluster 235	1073034	2.40532	Yeast	5
Cluster 235	1392856	-2.0986	Mycelium	5
Cluster 235	1438486	2.19816	Yeast	5
Cluster 235	1495122	-1.68586	Mycelium	5
Cluster 235	1576673	-4.64278	Mycelium	5
Cluster 6487	1325435	-2.58218	Mycelium	5
Cluster 6487	1370704	3.31301	Yeast	5
Cluster 6487	1473532	-5.15518	Mycelium	5
Cluster 6487	1520255	-3.62207	Mycelium	5
Cluster 886	1496502	4.60164	Yeast	5
Cluster 886	1503002	-5.09409	Mycelium	5
Cluster 886	1521924	-6.93295	Mycelium	5
Cluster 886	1533187	-6.04491	Mycelium	5
Cluster 886	1599288	-1.92699	Mycelium	5
Cluster 1184	1378700	7.14647	Yeast	5
Cluster 1184	1449632	3.24232	Yeast	5
Cluster 1184	1508037	-5.2943	Mycelium	5
Cluster 1184	1525438	2.77089	Yeast	5
Cluster 1184	1559320	2.9624	Yeast	5
Cluster 1230	1361543	-8.23936	Mycelium	5
Cluster 1230	1487976	1.4067	Yeast	5
Cluster 1230	1523452	-2.83779	Mycelium	5
Cluster 1230	1579556	-9.71627	Mycelium	5
Cluster 1230	1595237	-6.41447	Mycelium	5
Cluster 1576	1026019	1.94647	Yeast	5
Cluster 1576	1330460	1.24562	Yeast	5
Cluster 1576	1387115	1.52359	Yeast	5
Cluster 1576	1475329	-3.87816	Mycelium	5
Cluster 1576	1511614	-2.70112	Mycelium	5
Cluster 2135	1326522	1.96772	Yeast	5
Cluster 2135	1457521	-8.92264	Mycelium	5
Cluster 2135	1459611	3.13069	Yeast	5
Cluster 2135	1546843	-5.77303	Mycelium	5
Cluster 2135	1595181	-2.54218	Mycelium	5
Cluster 4911	1473547	1.64991	Yeast	5
Cluster 4911	1496373	1.70153	Yeast	5
Cluster 4911	1506145	-1.43546	Mycelium	5
Cluster 2393	1348890	-7.12511	Mycelium	5
Cluster 2393	1370995	-5.3091	Mycelium	5
Cluster 2393	1454240	2.1751	Yeast	5
Cluster 2393	1491813	1.366	Yeast	5
Cluster 2393	1572928	-2.97002	Mycelium	5
Cluster 2401	1006783	2.23693	Yeast	5
Cluster 2401	1456582	1.4125	Yeast	5
Cluster 2401	1489536	-7.84891	Mycelium	5
Cluster 2401	1535577	1.48823	Yeast	5
Cluster 2401	1568882	-1.35087	Mycelium	5
Cluster 2409	1355184	-7.00832	Mycelium	5
Cluster 2409	1393994	4.6444	Yeast	5
Cluster 2409	1457964	9.10767	Yeast	5
Cluster 2409	1503112	2.19	Yeast	5
Cluster 2409	1512113	1.83369	Yeast	5
Cluster 2732	1395154	-5.70915	Mycelium	5
Cluster 2732	1477376	-3.57653	Mycelium	5
Cluster 2732	1477579	-11.3094	Mycelium	5
Cluster 2732	1498356	4.82107	Yeast	5
Cluster 2732	1597212	-3.05908	Mycelium	5
Cluster 4535	1562277	-2.00862	Mycelium	5
Cluster 4535	1564424	-3.97109	Mycelium	5
Cluster 4535	1573879	-3.2922	Mycelium	5
Cluster 4535	1576427	2.00226	Yeast	5
Cluster 4535	1597771	-3.61695	Mycelium	5
Cluster 4703	1447956	-8.07076	Mycelium	5
Cluster 4703	1457376	-9.45154	Mycelium	5
Cluster 4703	1472850	1.21544	Yeast	5
Cluster 4703	1525494	4.1023	Yeast	5
Cluster 4703	1583042	3.74815	Yeast	5
Cluster 4911	1384066	1.79226	Yeast	5
Cluster 4911	1505851	1.37648	Yeast	5
Cluster 5462	1332298	2.73175	Yeast	5
Cluster 5462	1355208	4.40941	Yeast	5
Cluster 5462	1448300	1.12151	Yeast	5
Cluster 5462	1542782	-6.52446	Mycelium	5
Cluster 5462	1576377	-3.31759	Mycelium	5
Cluster 5664	1474418	-2.11088	Mycelium	5
Cluster 5664	1477345	-1.61201	Mycelium	5
Cluster 5664	1489669	4.07007	Yeast	5
Cluster 5664	1491566	-4.95912	Mycelium	5
Cluster 5664	1529853	4.04929	Yeast	5
Cluster 6487	1000305	-7.74823	Mycelium	5
Cluster 7742	1407718	3.31672	Yeast	5
Cluster 7742	1446829	3.84741	Yeast	5
Cluster 7742	1583071	-1.50049	Mycelium	5
Cluster 7742	1585522	3.28591	Yeast	5
Cluster 7742	1586848	2.71583	Yeast	5
Cluster 8504	1336324	-1.77217	Mycelium	5
Cluster 8504	1374157	2.56172	Yeast	5
Cluster 8504	1442949	2.38862	Yeast	5
Cluster 8504	1520276	3.15054	Yeast	5
Cluster 8504	1597111	2.8167	Yeast	5
Cluster 299	1342193	9.62264	Yeast	6
Cluster 299	1387380	3.38899	Yeast	6
Cluster 299	1502071	-3.25565	Mycelium	6
Cluster 299	1524351	-2.71082	Mycelium	6
Cluster 299	1576042	-6.136	Mycelium	6
Cluster 299	1579610	4.34139	Yeast	6
Cluster 2172	1504975	-1.75024	Mycelium	6
Cluster 2172	1528025	-1.61852	Mycelium	6
Cluster 1080	1463338	1.35644	Yeast	6
Cluster 1080	1480797	2.10639	Yeast	6
Cluster 1080	1492468	2.38376	Yeast	6
Cluster 1080	1533226	4.69935	Yeast	6
Cluster 1080	1533771	4.26371	Yeast	6
Cluster 1080	1594582	-9.03435	Mycelium	6
Cluster 1087	1345938	-6.43846	Mycelium	6
Cluster 1087	1394066	-5.75206	Mycelium	6
Cluster 1087	1557426	1.4553	Yeast	6
Cluster 1087	1557440	-10.7679	Mycelium	6
Cluster 1087	1557725	-5.6285	Mycelium	6
Cluster 1087	1557738	-6.58719	Mycelium	6
Cluster 2172	1475642	-1.69383	Mycelium	6
Cluster 2172	1489129	1.72226	Yeast	6
Cluster 4957	1385881	-9.06563	Mycelium	6
Cluster 4957	1463877	1.75761	Yeast	6
Cluster 4957	1548920	1.06862	Yeast	6
Cluster 4957	1584065	-5.14574	Mycelium	6
Cluster 2172	1510925	-1.21746	Mycelium	6
Cluster 2172	1563685	4.80502	Yeast	6
Cluster 7696	1480448	-4.62381	Mycelium	6
Cluster 7696	1536790	-1.80452	Mycelium	6
Cluster 4526	1378825	10.897	Yeast	6
Cluster 4526	1387181	3.00559	Yeast	6
Cluster 4526	1537987	2.36905	Yeast	6
Cluster 4526	1539789	1.88555	Yeast	6
Cluster 4526	1590432	-5.83969	Mycelium	6
Cluster 4526	1595683	-4.24324	Mycelium	6
Cluster 4957	1358824	-4.24607	Mycelium	6
Cluster 4957	1448407	-2.92859	Mycelium	6
Cluster 5042	1327707	-3.7517	Mycelium	6
Cluster 5042	1351554	5.56227	Yeast	6
Cluster 5042	1367255	-3.1184	Mycelium	6
Cluster 5042	1475897	-4.15378	Mycelium	6
Cluster 5042	1475916	2.24863	Yeast	6
Cluster 5042	1478497	-2.82016	Mycelium	6
Cluster 5399	1458607	-3.38761	Mycelium	6
Cluster 5399	1465233	-2.02446	Mycelium	6
Cluster 5399	1469227	-2.3627	Mycelium	6
Cluster 5399	1523396	-1.54813	Mycelium	6
Cluster 5399	1524865	-1.85832	Mycelium	6
Cluster 5399	1580981	5.2045	Yeast	6
Cluster 6681	1379674	-1.56862	Mycelium	6
Cluster 6681	1384157	-2.29292	Mycelium	6
Cluster 6681	1486926	3.46239	Yeast	6
Cluster 6681	1486930	-1.00699	Mycelium	6
Cluster 6681	1486980	4.90087	Yeast	6
Cluster 6681	1486987	-3.02574	Mycelium	6
Cluster 7696	1499840	3.77999	Yeast	6
Cluster 7696	1512327	-1.89757	Mycelium	6
Cluster 7696	1554693	-5.33723	Mycelium	6
Cluster 7696	1556669	2.25679	Yeast	6
Cluster 1634	1468502	3.24169	Yeast	7
Cluster 1634	1469642	1.09538	Yeast	7
Cluster 1634	1469656	-8.84623	Mycelium	7
Cluster 1634	1491069	-2.05669	Mycelium	7
Cluster 1634	1497332	-1.19604	Mycelium	7
Cluster 1634	1511994	1.48903	Yeast	7
Cluster 1634	1534907	-6.814	Mycelium	7
Cluster 2027	1392894	-5.75339	Mycelium	7
Cluster 2027	1393442	-2.08824	Mycelium	7
Cluster 2027	1499548	-7.16743	Mycelium	7
Cluster 2027	1535140	2.80006	Yeast	7
Cluster 2027	1539491	1.46787	Yeast	7
Cluster 2027	1553854	-1.39445	Mycelium	7
Cluster 2027	1562549	-5.95872	Mycelium	7
Cluster 2661	1373296	6.23031	Yeast	7
Cluster 2661	1376077	-6.09967	Mycelium	7
Cluster 2661	1381482	-8.19354	Mycelium	7
Cluster 2661	1490244	-5.30442	Mycelium	7
Cluster 2661	1498571	-6.33518	Mycelium	7
Cluster 2661	1508167	-2.79607	Mycelium	7
Cluster 2661	1541823	-6.22443	Mycelium	7
Cluster 3824	1443004	-1.61029	Mycelium	7
Cluster 3824	1461236	-3.26261	Mycelium	7
Cluster 3824	1484936	1.55803	Yeast	7
Cluster 3824	1489314	-3.88466	Mycelium	7
Cluster 3824	1513565	2.95031	Yeast	7
Cluster 3824	1545059	4.70437	Yeast	7
Cluster 3824	1559194	3.01789	Yeast	7
Cluster 8472	1488643	1.43074	Yeast	7
Cluster 8472	1538817	-5.11473	Mycelium	7
Cluster 8472	1551821	1.50848	Yeast	7
Cluster 8472	1561440	1.79177	Yeast	7
Cluster 8472	1566744	2.43727	Yeast	7
Cluster 8472	1567280	2.89816	Yeast	7
Cluster 8472	1568243	-6.62979	Mycelium	7
Cluster 222	1362943	-10.0536	Mycelium	8
Cluster 222	1376132	-10.354	Mycelium	8
Cluster 222	1387299	-1.96479	Mycelium	8
Cluster 222	1446329	-4.1469	Mycelium	8
Cluster 222	1462919	3.96133	Yeast	8
Cluster 222	1462957	3.43057	Yeast	8
Cluster 222	1464925	1.34091	Yeast	8
Cluster 222	1508281	-3.35193	Mycelium	8
Cluster 1967	1376525	-4.61942	Mycelium	8
Cluster 1967	1446740	3.92424	Yeast	8
Cluster 1967	1487934	2.8554	Yeast	8
Cluster 1967	1503067	2.32015	Yeast	8
Cluster 1967	1532355	3.83138	Yeast	8
Cluster 1967	1535181	1.90126	Yeast	8
Cluster 1967	1593223	-2.52502	Mycelium	8
Cluster 1967	1598571	3.23097	Yeast	8
Cluster 2646	1350271	1.84247	Yeast	8
Cluster 2646	1457236	1.76704	Yeast	8
Cluster 2646	1463385	6.72908	Yeast	8
Cluster 2646	1471474	3.57905	Yeast	8
Cluster 2646	1489813	2.24843	Yeast	8
Cluster 2646	1519581	-2.71586	Mycelium	8
Cluster 2646	1587720	1.19752	Yeast	8
Cluster 2646	1598601	2.37215	Yeast	8
Cluster 7273	1312581	5.14689	Yeast	9
Cluster 7273	1322572	2.35029	Yeast	9
Cluster 7273	1490156	1.61433	Yeast	9
Cluster 7273	1504248	2.05419	Yeast	9
Cluster 7273	1506787	3.12169	Yeast	9
Cluster 7273	1507905	-2.02776	Mycelium	9
Cluster 7273	1553434	1.46343	Yeast	9
Cluster 7273	1554714	2.86316	Yeast	9
Cluster 7273	1572436	3.47693	Yeast	9
Cluster 8637	1457987	2.3191	Yeast	10
Cluster 8637	1462061	2.2158	Yeast	10
Cluster 8637	1466878	4.04628	Yeast	10
Cluster 8637	1479759	3.19103	Yeast	10
Cluster 8637	1481383	-4.51746	Mycelium	10
Cluster 8637	1492222	2.01794	Yeast	10
Cluster 8637	1494814	3.5565	Yeast	10
Cluster 8637	1495477	3.09811	Yeast	10
Cluster 8637	1542918	4.24103	Yeast	10
Cluster 8637	1550528	6.49555	Yeast	10
Cluster 286	1442612	-2.71409	Mycelium	12
Cluster 286	1457033	-4.54529	Mycelium	12
Cluster 286	1470520	-3.02763	Mycelium	12
Cluster 286	1489127	-5.17019	Mycelium	12
Cluster 286	1493732	-2.58753	Mycelium	12
Cluster 286	1494782	-1.59316	Mycelium	12
Cluster 286	1495975	-1.61282	Mycelium	12
Cluster 286	1499303	-4.04692	Mycelium	12
Cluster 286	1501103	-3.4235	Mycelium	12
Cluster 286	1532635	-3.95384	Mycelium	12
Cluster 286	1538871	-6.50107	Mycelium	12
Cluster 286	1594803	2.95602	Yeast	12
Cluster 3071	1465088	6.51899	Yeast	12
Cluster 3071	1494833	5.6723	Yeast	12
Cluster 3071	1496706	4.11316	Yeast	12
Cluster 3071	1503308	10.242	Yeast	12
Cluster 3071	1503313	7.06614	Yeast	12
Cluster 3071	1506886	4.73183	Yeast	12
Cluster 3071	1513485	5.83627	Yeast	12
Cluster 3071	1513498	8.56159	Yeast	12
Cluster 3071	1589642	-8.29619	Mycelium	12
Cluster 3071	1350265	3.47176	Yeast	12
Cluster 3071	1450323	-6.07451	Mycelium	12
Cluster 3071	1469384	4.95364	Yeast	12
Cluster 3869	1068210	-3.24918	Mycelium	19
Cluster 3869	1324013	-7.05183	Mycelium	19
Cluster 3869	1355326	-2.17705	Mycelium	19
Cluster 3869	1380612	-4.24481	Mycelium	19
Cluster 3869	1390214	-1.77824	Mycelium	19
Cluster 3869	1562255	-3.06958	Mycelium	19
Cluster 3869	1567989	-4.74828	Mycelium	19
Cluster 3869	1570864	-5.27949	Mycelium	19
Cluster 3869	1573406	-3.32675	Mycelium	19
Cluster 3869	1573454	4.00381	Yeast	19
Cluster 3869	1573944	-4.52747	Mycelium	19
Cluster 3869	1576602	-5.27656	Mycelium	19
Cluster 3869	1580771	2.08624	Yeast	19
Cluster 3869	1592059	-2.52424	Mycelium	19
Cluster 3869	1595283	-1.48157	Mycelium	19
Cluster 3869	1595301	2.06124	Yeast	19
Cluster 3869	1595679	-3.65218	Mycelium	19
Cluster 3869	1600903	3.59123	Yeast	19
Cluster 3869	1601032	-2.8154	Mycelium	19
