# Supplementary material for: Coordinated Gene Family Evolution Shapes the Genome of Dimorphic Organisms
Source: Research Square preprint supplement (doi:10.21203/rs.3.rs-6393820/v1), 2025-04-08
Supplement: Supplementary file 3 [file 4daf12f1e4777051b2350690.xlsx]

## Sheet: YvsPM
GeneID	log2(FC)	P-adj
1496180	-13.7798	4.46e-30	product_name=vitamin H transporter
1447330	-9.93502	7.95e-150	product_name=Domain of unknown function (DUF3472)-domain containing protein
1591260	-9.46332	3.81e-42	product_name=BTB/POZ protein
1586609	-9.31443	7.47e-18	product_name=Transmembrane amino acid transporter protein-domain containing protein
1520598	-8.86595	0	product_name=H+-transporting ATPase
1548494	-8.80781	2.52e-23	product_name=S-adenosyl-L-methionine-dependent methyltransferase
1590358	-8.76936	1.45e-11	product_name=hypothetical protein
1474507	-8.59818	1.7e-158	product_name=CAP domain-containing protein
1533237	-8.55263	6.33e-36	product_name=hypothetical protein
1395857	-8.52294	4.08e-94	product_name=hypothetical protein
1498841	-8.42115	6.24e-50	product_name=hypothetical protein
1458113	-8.4073	2.26e-39	product_name=RlpA-like double-psi beta-barrel-protein domain-containing protein-containing protein
1515926	-8.39132	3.58e-104	product_name=phosphoesterase family-domain-containing protein
1502884	-8.32061	2.18e-10	product_name=Distantly related to plant expansins|RlpA-like double-psi beta-barrel-containing protein domain-containing protein
1442309	-8.2936	6.67e-32	product_name=hypothetical protein
1476754	-8.26298	9.39e-31	product_name=General substrate transporter
1516366	-8.08014	9.15e-45	product_name=transmembrane amino acid transporter protein-domain-containing protein
1516586	-8.0452	2.96e-51	product_name=hypothetical protein
1500193	-7.9953	2.93e-19	product_name=hypothetical protein
1531093	-7.97496	7.44e-122	product_name=hypothetical protein
1477825	-7.94736	7.78e-30	product_name=Translation Initiation factor eIF- 4e-like domain-containing protein
1577712	-7.92859	1.61e-09	product_name=hypothetical protein
1475433	-7.9019	1.72e-18	product_name=hypothetical protein
1546453	-7.85371	9.43e-105	product_name=Peptidase S8/S53 domain-containing protein
1369983	-7.8532	2.23e-07	product_name=hypothetical protein
1353013	-7.84745	5.67e-06	product_name=hypothetical protein
1593246	-7.79434	1.88e-12	product_name=Catalytic component of the RISC complex similar to Argonaute|Piwi domain-domain containing protein
1580414	-7.76995	1.42e-09	product_name=hypothetical protein
1537602	-7.7548	1.33e-234	product_name=chitin synthase
1374151	-7.74934	2.38e-70	product_name=hypothetical protein
1446176	-7.67804	3.38e-113	product_name=Ribonucleotide reductase%2C barrel domain-domain containing protein
1587351	-7.66739	9.79e-70	product_name=general substrate transporter
1509200	-7.63485	5.9e-178	product_name=hypothetical protein
1528810	-7.59309	6.69e-149	product_name=hypothetical protein
1468263	-7.4636	1.96e-07	product_name=hypothetical protein
1381482	-7.42408	1.94e-07	product_name=Carbohydrate Esterase Family 4 protein|hypothetical protein
1366700	-7.40979	2.22e-274	product_name=hypothetical protein
1586987	-7.3877	3.21e-15	product_name=transmembrane amino acid transporter protein-domain-containing protein
1514465	-7.37954	5.69e-69	product_name=periplasmic binding protein-like I
1451834	-7.36558	8.56e-143	product_name=hypothetical protein
1532410	-7.35177	1.02e-10	product_name=chitinase 1
1539681	-7.32872	4.66e-08	product_name=lipase
1433212	-7.2461	2.03e-06	product_name=hypothetical protein
1465138	-7.23335	3.87e-07	product_name=Dbl homology domain-containing protein
1545013	-7.21494	4.55e-22	product_name=lipase
1463175	-7.19832	5.96e-261	product_name=hypothetical protein
1460646	-7.19712	8.27e-76	product_name=p53-like transcription factor
1595569	-7.17808	6.12e-07	product_name=hypothetical protein
1494621	-7.12758	7.65e-116	product_name=thiamine diphosphate-binding protein
1480110	-7.12514	7.73e-111	product_name=RlpA-like double-psi beta-barrel-protein domain-containing protein-containing protein
1031119	-7.1191	1.16e-18	product_name=expressed protein
1549130	-7.09359	3.65e-40	product_name=hypothetical protein
1556858	-7.06406	2.06e-18	product_name=hypothetical protein
1484175	-7.05463	1.05e-267	product_name=Distantly related to plant expansins|RlpA-like double-psi beta-barrel-containing protein domain-containing protein
1447956	-7.05401	2.58e-07	product_name=hypothetical protein
1373145	-7.01531	2.19e-08	product_name=hypothetical protein
1530795	-7.00741	5.04e-225	product_name=GNS1/SUR4 family-domain containing protein
1483268	-6.98336	0	product_name=chitin synthase
1522906	-6.98286	2.2e-26	product_name=Septin-type guanine nucleotide-binding (G) domain-containing protein
1391973	-6.90368	2.13e-08	product_name=hypothetical protein
1332180	-6.89736	6.89e-240	product_name=carbohydrate esterase family 4 protein
1485862	-6.89332	3.92e-09	product_name=ELO family
1473419	-6.88491	3.26e-184	product_name=hypothetical protein
1349367	-6.88487	5.99e-156	product_name=phospholipid-transporting ATPase
1370696	-6.87638	1.31e-09	product_name=hypothetical protein
1536446	-6.87344	2.69e-112	product_name=hypothetical protein
1528697	-6.86988	5.86e-52	product_name=hypothetical protein
1492313	-6.86644	5.05e-103	product_name=hypothetical protein
1485878	-6.85091	0	product_name=hypothetical protein
1502506	-6.84109	3.96e-118	product_name=hypothetical protein
1382443	-6.83944	1.12e-06	product_name=CotH protein-domain containing protein
1506753	-6.81841	2.38e-95	product_name=Ubiquinol-cytochrome c reductase core subunit 10 QCR10|Ubiquinol-cytochrome-c reductase complex subunit (QCR10)-domain containing protein
1381032	-6.80129	1.67e-20	product_name=General substrate transporter
1521924	-6.80033	4.07e-139	product_name=glycosyltransferase|Glycosyltransferase Family 49 protein
1453499	-6.76534	4.22e-05	product_name=hypothetical protein
1587034	-6.71037	1.32e-83	product_name=hypothetical protein
1479353	-6.70883	2.26e-80	product_name=Sodium/sulfate symporter
1372558	-6.67473	2.05e-05	product_name=C2H2-type zinc finger transcription factor
1467110	-6.67277	8.77e-09	product_name=hypothetical protein
1324013	-6.66151	8.72e-09	product_name=hypothetical protein
1461684	-6.65771	2.02e-12	product_name=hypothetical protein
1586879	-6.6299	7.71e-133	product_name=glycoside hydrolase family 28 protein
1514924	-6.61896	1.04e-94	product_name=hypothetical protein
1466398	-6.59595	1.88e-10	product_name=Bestrophin%2C RFP-TM%2C chloride channel-domain-containing protein
1414357	-6.58043	2.08e-05	product_name=hypothetical protein
1511905	-6.56966	1.13e-93	product_name=hypothetical protein
1590114	-6.56032	1.22e-05	product_name=acyl-CoA oxidase
1365458	-6.53949	2.36e-25	product_name=signal transducer
1501734	-6.50614	6.42e-28	product_name=hypothetical protein
1591216	-6.41975	2.45e-153	product_name=Protein of unknown function (DUF3808)-domain containing protein
1597002	-6.41141	6.08e-33	product_name=2-oxoacid dehydrogenases acyltransferase (catalytic domain)-domain containing protein
1463020	-6.40955	1.91e-75	product_name=hypothetical protein
1455506	-6.40014	0	product_name=hypothetical protein
1360264	-6.39134	1.17e-58	product_name=hypothetical protein
1479095	-6.38348	5.73e-118	product_name=NADH-ubiquinone reductase complex 1 MLRQ subunit-domain containing protein
1378526	-6.36176	7.47e-11	product_name=hypothetical protein
1333955	-6.3616	3.98e-278	product_name=Ser-Thr-rich glycosyl-phosphatidyl-inositol-anchored membrane family-domain-containing protein
1500684	-6.35696	7.35e-93	product_name=glycosyltransferase|Glycosyltransferase Family 5 protein
1394253	-6.32982	1.71e-67	product_name=glycoside hydrolase
1546790	-6.31779	3.9e-40	product_name=glycoside hydrolase|Glycoside Hydrolase Family 28 protein
1024558	-6.30472	0.000252156	product_name=expressed protein
1490939	-6.30111	4.19e-151	product_name=rab GTPase activator
1513802	-6.30108	6.41e-32	product_name=peptidase S8/S53 domain-containing protein
1493662	-6.29571	4.98e-39	product_name=hypothetical protein
1523594	-6.26925	3.14e-137	product_name=hypothetical protein
1535656	-6.26066	0	product_name=Protein of unknown function (DUF3759)-domain containing protein
1455497	-6.25618	6.24e-09	product_name=hypothetical protein
1499570	-6.21943	6.19e-148	product_name=Protein of unknown function (DUF3808)-domain containing protein
1502576	-6.19406	0.0357913	product_name=hypothetical protein
1532248	-6.19207	8.18e-95	product_name=hypothetical protein
1459565	-6.14983	1.9e-199	product_name=kinase-like domain-containing protein
1584681	-6.13637	2.37e-05	product_name=expressed protein
1477953	-6.13316	5.25e-219	product_name=hypothetical protein
1527312	-6.11261	2.55e-150	product_name=hypothetical protein
1537960	-6.0967	4.39e-75	product_name=hypothetical protein
1595680	-6.08399	4.72e-09	product_name=purine permease protein
1378068	-6.07323	1.02e-119	product_name=Acyl-CoA dehydrogenase/oxidase%2C N-terminal and middle domain-containing protein
1591901	-6.05474	1.09e-47	product_name=hypothetical protein
1535741	-6.05394	1.19e-131	product_name=thiamine diphosphate-binding protein
1516482	-6.05338	2.08e-11	product_name=hypothetical protein
1548854	-6.04755	2.42e-67	product_name=hypothetical protein
1541823	-6.04608	2.64e-231	product_name=carbohydrate esterase|Carbohydrate Esterase Family 4 protein
1471544	-6.04201	5.64e-112	product_name=carbohydrate-binding module family 50 protein
1441627	-6.03872	7.94e-05	product_name=hypothetical protein
1385889	-6.03124	7.59e-140	product_name=hypothetical protein
1516911	-6.00748	6.87e-20	product_name=expressed protein
1468170	-6.00451	2.32e-151	product_name=hypothetical protein
1557627	-5.99751	5.83e-30	product_name=major facilitator superfamily domain-containing protein
1589529	-5.98924	7.34e-126	product_name=carbamoyl-phosphate synthase L chain%2C ATP binding domain-containing protein
1437783	-5.97739	0.00117751	product_name=hypothetical protein
1365292	-5.97247	3.24e-34	product_name=p53-like transcription factor
1601554	-5.96169	2.37e-11	product_name=Domain of unknown function DUF221-domain containing protein
1527519	-5.95587	3.98e-12	product_name=amino acid permease-domain-containing protein
1463710	-5.94736	1.34e-165	product_name=ras guanine nucleotide exchange factor domain-containing protein
1479947	-5.9447	0.000695358	product_name=hypothetical protein
1321417	-5.93479	1.2e-147	product_name=hypothetical protein
1387697	-5.92129	1.35e-06	product_name=hypothetical protein
1106431	-5.90758	0.0274202	product_name=hypothetical protein
1473944	-5.90292	0.0276137	product_name=hypothetical protein
1464670	-5.88221	2.97e-60	product_name=hypothetical protein
1529446	-5.87893	2.71e-170	product_name=hypothetical protein
1485652	-5.85042	1.24e-136	product_name=Oxidative stress survival%2C Svf1-like protein
1477165	-5.84935	5.81e-182	product_name=p53-like transcription factor|p53-like transcription factor OAD07988.1 p53-like transcription factor
1516997	-5.84789	6.81e-64	product_name=regulator of G protein signaling domain-containing protein
1351494	-5.84305	4.38e-05	product_name=Protein of unknown function%2C DUF606-domain containing protein
1490880	-5.82693	8.8e-96	product_name=hypothetical protein
1497304	-5.81209	2.24e-89	product_name=Ankyrin repeat-containing domain protein
1457521	-5.80674	2.32e-11	product_name=cytochrome P450
1488677	-5.80557	1.57e-145	product_name=Tetraspanin family-domain-containing protein
1457129	-5.80216	5.44e-158	product_name=cell division control protein
1368110	-5.80095	1.75e-58	product_name=hypothetical protein
1447092	-5.77682	1.15e-38	product_name=hypothetical protein
1353007	-5.77558	0.00105536	product_name=hypothetical protein
1473385	-5.76784	1.23e-11	product_name=Dynein light intermediate chain (DLIC)-domain containing protein
1393736	-5.76723	5.27e-21	product_name=bacterial low temperature requirement A protein-domain-containing protein
1535074	-5.76232	3.87e-200	product_name=hypothetical protein
1549423	-5.7618	1.92e-138	product_name=hypothetical protein
1502584	-5.7616	2.19e-64	product_name=hypothetical protein
1346969	-5.75582	2.33e-145	product_name=kinase-like domain-containing protein
1527620	-5.75033	2.06e-141	product_name=Tubulin/FtsZ%2C GTPase domain-containing protein
1588502	-5.73861	6.31e-25	product_name=Endonuclease/exonuclease/phosphatase
1456131	-5.71864	2.15e-68	product_name=hypothetical protein
1378177	-5.70757	1.19e-05	product_name=WD40-repeat-containing domain protein
1484004	-5.70506	2.05e-52	product_name=hypothetical protein
1367627	-5.68611	3.33e-08	product_name=Cytochrome P450 CYP5313|cytochrome P450 CYP5313 OAD06230.1 cytochrome P450 CYP5313
1467427	-5.67803	1.54e-260	product_name=Helix-loop-helix DNA-binding domain-containing transcription factor|helix-loop-helix DNA-binding domain-containing transcription factor OAD01078.1 helix-loop-helix DNA-binding domain-containing transcription factor
1556656	-5.66321	6.41e-172	product_name=P-loop containing nucleoside triphosphate hydrolase protein
1445953	-5.65549	3.56e-164	product_name=Thiolase%2C N-terminal domain-containing protein
1494808	-5.64637	5.87e-118	product_name=methylcrotonoyl-CoA carboxylase beta chain
1500568	-5.64595	1.01e-05	product_name=expressed protein
1473620	-5.64551	3.02e-133	product_name=Distantly related to plant expansins|RlpA-like double-psi beta-barrel-containing protein domain-containing protein
1451144	-5.64227	4.66e-175	product_name=hypothetical protein
1375812	-5.64133	1.25e-10	product_name=hypothetical protein
1489895	-5.63594	6.02e-248	product_name=hypothetical protein
1362444	-5.62994	2.46e-155	product_name=ARM repeat-containing protein
1335829	-5.61039	7.23e-189	product_name=glycosyltransferase family 2 protein
1519838	-5.60704	2.08e-104	product_name=hypothetical protein
1514484	-5.59891	2.47e-21	product_name=hypothetical protein
1540039	-5.59643	5.7e-111	product_name=endo-beta-D-1%2C4-glucanase
1599215	-5.59184	1.09e-30	product_name=SPX domain-domain containing protein
1511327	-5.58843	1.16e-18	product_name=hypothetical protein
1586347	-5.58806	7.42e-57	product_name=hypothetical protein
1549709	-5.58318	2.35e-56	product_name=hypothetical protein
1347030	-5.5809	1.7e-279	product_name=chitin synthase
1448244	-5.56386	7.48e-06	product_name=Major facilitator superfamily domain-containing protein
1392716	-5.56049	1.03e-73	product_name=ClpP/crotonase-like domain-containing protein
1396139	-5.55339	6.65e-81	product_name=SUR7/PalI family-domain containing protein
1451329	-5.53386	6.3e-31	product_name=hypothetical protein
1529552	-5.51181	1.06e-71	product_name=hypothetical protein
1484069	-5.50927	1.71e-89	product_name=Ribosomal protein S8e/ribosomal biogenesis NSA2
1528630	-5.48944	8.33e-126	product_name=Armadillo-type fold
1524594	-5.47734	3.94e-73	product_name=Alcohol dehydrogenase
1545731	-5.4639	9.54e-18	product_name=gamma-glutamyltranspeptidase
1467506	-5.44595	3.46e-120	product_name=hypothetical protein
1453634	-5.44591	5.04e-75	product_name=P-loop containing nucleoside triphosphate hydrolase protein
1517042	-5.42843	1.5e-16	product_name=hypothetical protein
1549723	-5.42583	2.82e-121	product_name=Phosphoribosyltransferase-like protein
1469869	-5.42084	3.68e-08	product_name=hypothetical protein
1416601	-5.41221	0.00546533	product_name=expressed protein
1465504	-5.41215	3.23e-07	product_name=camp-dependent protein kinase
1375399	-5.40883	9.48e-10	product_name=Fungal specific transcription factor domain-domain containing protein
1518536	-5.40732	3.25e-44	product_name=hypothetical protein
1521867	-5.40407	3.19e-14	product_name=hypothetical protein
1383286	-5.39977	0.000615589	product_name=hypothetical protein
1476430	-5.39969	1.95e-05	product_name=hypothetical protein
1493974	-5.39718	1.01e-143	product_name=hypothetical protein
1457376	-5.39541	0.000548678	product_name=hypothetical protein
1493858	-5.39154	4e-57	product_name=hypothetical protein
1382617	-5.38812	7.85e-19	product_name=Carotenoid oxygenase
1468741	-5.37055	2.51e-07	product_name=HLH-domain-containing basic-leucine zipper (bZIP) transcription factor|HLH-domain-containing basic-leucine zipper transcription factor
1526737	-5.34278	5.12e-89	product_name=hypothetical protein
1494058	-5.34037	1.04e-16	product_name=expressed protein
1454092	-5.33417	0.000306833	product_name=Up-regulated During Septation-domain containing protein
1523822	-5.32829	5.79e-175	product_name=Ribosomal protein L1p/L10e family-domain containing protein
1363019	-5.32109	4.03e-11	product_name=hypothetical protein
1432453	-5.31176	0.000734343	product_name=hypothetical protein
1523399	-5.30802	7.17e-105	product_name=Regulator of development and secondary metabolism of the velvet family. Similar to VosA|Velvet factor-domain containing protein
1449798	-5.30211	6.14e-24	product_name=hypothetical protein
1453998	-5.28428	0.00842997	product_name=Glycoside hydrolase superfamily
1534907	-5.2764	2.45e-11	product_name=hypothetical protein
1000253	-5.2609	0.0124574	product_name=hypothetical protein
1505679	-5.2575	1.63e-49	product_name=DHHC palmitoyltransferase-domain-containing protein
1453515	-5.25624	8.99e-83	product_name=Glycoside Hydrolase Family 5 protein|glycoside hydrolase superfamily
1342072	-5.24807	1.52e-65	product_name=hypothetical protein
1460757	-5.23861	9.08e-146	product_name=GMC oxidoreductase
1516013	-5.2307	9.55e-140	product_name=hypothetical protein
1386575	-5.2155	6.04e-41	product_name=hypothetical protein
1502557	-5.21063	1.51e-121	product_name=Helix-loop-helix DNA-binding domain-containing transcription factor|helix-loop-helix DNA-binding domain-containing transcription factor OAD09049.1 helix-loop-helix DNA-binding domain-containing transcription factor
1540644	-5.21041	2.24e-132	product_name=Peptidase M24%2C structural domain-containing protein
1018691	-5.20647	6.13e-46	product_name=hypothetical protein
1565158	-5.20348	2.66e-44	product_name=CDC50/LEM3 family
1449029	-5.202	8.59e-12	product_name=hypothetical protein
1507244	-5.18316	7.13e-61	product_name=S-adenosyl-L-methionine-dependent methyltransferase
1562884	-5.17834	1.93e-112	product_name=hypothetical protein
1552867	-5.17826	7.38e-22	product_name=glycosyltransferase family 17 protein
1508037	-5.1782	9.91e-113	product_name=hypothetical protein
1516339	-5.17461	0.000105083	product_name=fork head domain-containing protein
1451517	-5.15908	2.21e-11	product_name=Bestrophin%2C RFP-TM%2C chloride channel-domain containing protein
1568050	-5.15897	0.00171909	product_name=BTB/POZ fold
1516079	-5.14821	1.04e-33	product_name=hypothetical protein
1140241	-5.14788	1.79e-126	product_name=C2H2-type zinc finger transcription factor
1543406	-5.14627	3.9e-45	product_name=glycosyltransferase family 49 protein
1498426	-5.14127	1.11e-11	product_name=hypothetical protein
1376907	-5.12602	1.17e-26	product_name=hypothetical protein
1443180	-5.11923	4.01e-63	product_name=expressed protein
1557359	-5.11804	1.62e-46	product_name=hypothetical protein
1599283	-5.11494	5.25e-75	product_name=hypothetical protein
1446167	-5.11441	0.000120404	product_name=hypothetical protein
1516406	-5.1087	1.04e-13	product_name=expressed protein
1578119	-5.0911	0.0242919	product_name=hypothetical protein
1517004	-5.08589	5.41e-48	product_name=glycoside hydrolase family 20 protein
1599345	-5.08326	3.06e-07	product_name=hypothetical protein
1482579	-5.08156	4.37e-180	product_name=u3 small nucleolar RNA-associated protein
1455850	-5.08004	4.5e-31	product_name=hypothetical protein
1487973	-5.07134	8.33e-23	product_name=hypothetical protein
1551079	-5.05729	2.47e-24	product_name=hypothetical protein
1598202	-5.05272	1.42e-150	product_name=hypothetical protein
1498476	-5.04023	1.12e-05	product_name=CRAL-TRIO domain-containing protein
1500561	-5.0394	3.01e-58	product_name=Interferon-inducible GTPase (IIGP)-domain containing protein
1525774	-5.03192	2.57e-20	product_name=general substrate transporter
1552029	-5.0306	2.83e-59	product_name=hypothetical protein
1477472	-5.02335	0.0155888	product_name=hypothetical protein
1515225	-5.01893	4.53e-82	product_name=dimethyladenosine transferase
1378572	-5.01853	0.031966	product_name=p53-like transcription factor|p53-like transcription factor OAC99448.1 p53-like transcription factor
1483128	-5.00743	5.81e-225	product_name=Thiolase%2C N-terminal domain-domain containing protein
1493407	-4.99656	7.39e-126	product_name=hypothetical protein
1471342	-4.99332	2.67e-192	product_name=hypothetical protein
1353746	-4.98929	7.72e-139	product_name=WD40-repeat-containing domain protein
1498571	-4.98612	1.5e-208	product_name=hypothetical protein
1378888	-4.98524	1.04e-75	product_name=hypothetical protein
1522255	-4.97915	1.33e-53	product_name=Mitochondrial branched-chain alpha-ketoacid dehydrogenase kinase-domain containing protein
1497176	-4.97898	7.13e-237	product_name=Nucleotide-diphospho-sugar transferase
1336444	-4.97637	5.63e-149	product_name=hypothetical protein
1374824	-4.97401	8.62e-16	product_name=kinase-like domain-containing protein
1347525	-4.96366	3.8e-133	product_name=NMD3 family-domain containing protein
1453569	-4.96175	2.29e-60	product_name=Zn(2)-C6 fungal-specific transcription factor|Zn(2)-C6 fungal-specific transcription factor OAD01721.1 Zn(2)-C6 fungal-specific transcription factor
1542992	-4.95884	1.5e-39	product_name=hypothetical protein
1497643	-4.9495	2.52e-07	product_name=expressed protein
1451656	-4.93961	2.33e-115	product_name=Brix domain-domain containing protein
1396611	-4.93949	4.53e-114	product_name=60S ribosomal protein L7-like protein
1000305	-4.93602	4.29e-18	product_name=ras-like protein 3
1489072	-4.93533	4.66e-157	product_name=polysaccharide lyase|Polysaccharide Lyase Family 14 protein
1335846	-4.92757	1.92e-131	product_name=ankyrin repeat-containing domain protein
1466194	-4.92275	1.85e-65	product_name=hypothetical protein
1497344	-4.92124	7.56e-90	product_name=CNH-domain-containing protein
1529873	-4.91725	7.96e-41	product_name=hypothetical protein
1489610	-4.91303	7.7e-34	product_name=hypothetical protein
1463924	-4.91115	0.000920038	product_name=hypothetical protein
1389313	-4.90866	0.0138496	product_name=hypothetical protein
1484040	-4.90496	1.48e-30	product_name=Acyl-CoA N-acyltransferase
1377346	-4.89728	4.14e-30	product_name=hypothetical protein
1460641	-4.87335	3.91e-35	product_name=hypothetical protein
1448500	-4.86965	1.79e-162	product_name=riboflavin aldehydeforming enzyme
1594149	-4.86903	6.62e-08	product_name=hypothetical protein
1358871	-4.86692	1.94e-08	product_name=hypothetical protein
1392067	-4.85248	8.48e-58	product_name=hypothetical protein
1319384	-4.8449	3.48e-29	product_name=hypothetical protein
1340681	-4.84423	3.93e-05	product_name=hypothetical protein
1474222	-4.81207	2.09e-09	product_name=hypothetical protein
1490733	-4.80707	2.01e-54	product_name=hypothetical protein
1553049	-4.80297	1.17e-249	product_name=hypothetical protein
1507127	-4.80262	7.59e-140	product_name=WD40-repeat-containing domain protein
1593109	-4.80165	2.38e-161	product_name=Pescadillo N-terminus-domain containing protein
1511881	-4.80163	9e-158	product_name=hypothetical protein
1527832	-4.8	1.66e-36	product_name=hypothetical protein
1323195	-4.79819	0.000892269	product_name=hypothetical protein
1497290	-4.79631	3.34e-100	product_name=hypothetical protein
1079553	-4.79407	5.1e-98	product_name=hypothetical protein
1497542	-4.79069	3.16e-126	product_name=hypothetical protein
1479529	-4.78772	3.41e-113	product_name=hypothetical protein
1506074	-4.77967	0.0143914	product_name=hypothetical protein
1373830	-4.77682	0.0430804	product_name=hypothetical protein
1448109	-4.77204	7.29e-83	product_name=ribosomal L28e protein family-domain-containing protein
1535163	-4.77189	0.0370537	product_name=expressed protein
1443421	-4.76958	0.00610202	product_name=hypothetical protein
1417175	-4.76226	0.0330995	product_name=C2H2-type zinc finger transcription factor
1485486	-4.75452	2.06e-150	product_name=CTP synthase N-terminus-domain containing protein
1455582	-4.75334	8.15e-51	product_name=sec7 domain-containing protein
1581301	-4.74623	0.0345189	product_name=hypothetical protein
1557738	-4.74616	2.4e-25	product_name=hypothetical protein
1593427	-4.74596	0.00577354	product_name=hypothetical protein
1594914	-4.74006	8.68e-23	product_name=hypothetical protein
1577715	-4.73486	0.0345001	product_name=hypothetical protein
1163071	-4.7345	0.00716115	product_name=hypothetical protein
1395610	-4.73017	2.2e-24	product_name=hypothetical protein
1546810	-4.73004	2.48e-05	product_name=hypothetical protein
1553141	-4.72184	0.00197449	product_name=expressed protein
1475875	-4.72162	3.64e-23	product_name=Na+ dependent nucleoside transporter C-terminus-domain containing protein
1347700	-4.72085	1.54e-34	product_name=hypothetical protein
1541836	-4.71582	1.39e-13	product_name=Cytochrome P450 CYP5213|cytochrome P450 CYP5213 OAD06210.1 cytochrome P450 CYP5213
1486451	-4.69509	1.04e-10	product_name=Haemolysin-III related-domain containing protein
1448105	-4.6917	0.0381247	product_name=expressed protein
1496222	-4.69131	9.73e-107	product_name=Ribosomal protein L10-domain containing protein
1463888	-4.68456	7.12e-05	product_name=Domain of unknown function (DUF4203)-domain containing protein
1346383	-4.66257	0	product_name=Mitochondrial carrier domain-containing protein
1437982	-4.6614	1.94e-90	product_name=hypothetical protein
1585180	-4.65884	7.06e-64	product_name=methylmalonate-semialdehyde dehydrogenase
1516010	-4.65732	9.84e-34	product_name=hypothetical protein
1355822	-4.65511	1.05e-128	product_name=Metallo-dependent phosphatase-like protein
1592244	-4.64298	3.28e-59	product_name=mannosyltransferase putative-domain-containing protein
1492358	-4.6416	7.05e-06	product_name=hypothetical protein
1593638	-4.64081	0.000103448	product_name=hypothetical protein
1461869	-4.63313	1.16e-137	product_name=Utp21 specific WD40 associated putative domain-containing protein
1370951	-4.62834	1.09e-76	product_name=hypothetical protein
1386661	-4.62745	1.23e-12	product_name=hypothetical protein
1533187	-4.6258	2.07e-07	product_name=glycosyl-transferase for dystroglycan-domain-containing protein
1552830	-4.61372	0.0590476	product_name=helix-loop-helix DNA-binding domain-containing transcription factor
1496327	-4.60785	5.92e-127	product_name=hypothetical protein
1492436	-4.60206	5.09e-22	product_name=Major facilitator superfamily domain-containing protein
1454781	-4.601	3.2e-57	product_name=expressed protein
1482264	-4.59962	1.05e-86	product_name=C2H2-type Zinc finger transcription factor|C2H2-type zinc finger transcription factor OAC99487.1 C2H2-type zinc finger transcription factor
1486650	-4.59764	2.33e-136	product_name=hypothetical protein
1476147	-4.59277	7.26e-132	product_name=hypothetical protein
1322359	-4.59008	0.0599513	product_name=Cyclin|cyclin OAD02551.1 cyclin
1373480	-4.58969	8.29e-80	product_name=hypothetical protein
1180041	-4.58487	0.00120191	product_name=expressed protein
1458012	-4.58463	8.73e-76	product_name=WD40-repeat-containing domain protein
1454143	-4.57795	4.36e-199	product_name=chitin deacetylase
1355184	-4.57749	3.13e-76	product_name=POT family-domain-containing protein
1394117	-4.5769	6.23e-109	product_name=hypothetical protein
1351166	-4.57309	2.25e-73	product_name=hypothetical protein
1548855	-4.57152	2.77e-47	product_name=hypothetical protein
1508769	-4.56469	1.2e-128	product_name=hypothetical protein
1545638	-4.56336	5.84e-56	product_name=hypothetical protein
1490318	-4.55851	0.000186218	product_name=hypothetical protein
1464015	-4.55509	7.4e-35	product_name=hypothetical protein
1395147	-4.54565	5.03e-84	product_name=WD40-repeat-containing domain protein
1553590	-4.54437	1.14e-55	product_name=Grap2 and cyclin-D-interacting-domain containing protein
1465892	-4.54091	2.26e-38	product_name=hypothetical protein
1475880	-4.54062	0.0385707	product_name=hypothetical protein
1545342	-4.53902	5.08e-157	product_name=hypothetical protein
1472378	-4.53169	2.36e-220	product_name=Serine dehydratase alpha chain-domain containing protein
1548348	-4.52837	4.44e-19	product_name=RGS domain-containing protein
1583157	-4.52192	8.92e-06	product_name=hypothetical protein
1513990	-4.52165	3.71e-96	product_name=Pyridoxal phosphate-dependent transferase
1361789	-4.51783	1.64e-06	product_name=P-loop containing nucleoside triphosphate hydrolase protein
1513041	-4.51042	0.000666327	product_name=Cation/H+ exchanger
1524571	-4.50617	6.95e-94	product_name=C2H2-type Zinc finger transcription factor|C2H2-type zinc finger transcription factor OAD03879.1 C2H2-type zinc finger transcription factor
1350200	-4.50483	2.85e-110	product_name=cellular morphogenesis protein
1528712	-4.49052	6.21e-69	product_name=acyl-CoA dehydrogenase/oxidase
1459002	-4.48872	6.3e-128	product_name=hypothetical protein
1383246	-4.48867	3.31e-22	product_name=Zn(2)-C6 fungal-specific transcription factor OAD09137.1 Zn(2)-C6 fungal-specific transcription factor
1353435	-4.48642	2.16e-12	product_name=Bacterial low temperature requirement A protein (LtrA)-domain containing protein
1588774	-4.48515	7.31e-145	product_name=hypothetical protein
1536916	-4.48283	1.9e-67	product_name=hypothetical protein
1582758	-4.48167	3.12e-231	product_name=hypothetical protein
1506475	-4.48104	3.71e-135	product_name=Distantly related to plant expansins|RlpA-like double-psi beta-barrel-containing protein domain-containing protein
1395629	-4.4775	8.01e-08	product_name=hypothetical protein
1376525	-4.47238	3.98e-143	product_name=Heat shock protein 70 family
1518461	-4.4717	6.39e-82	product_name=nucleoside diphosphate kinase
1379179	-4.46778	0.0142534	product_name=Basic-leucine zipper (bZIP) transcription factor|basic-leucine zipper transcription factor
1495853	-4.46272	5.1e-116	product_name=CNH domain-containing protein
1536104	-4.45709	7.79e-16	product_name=magnesium transporter
1538871	-4.45296	0.000219051	product_name=Small GTPase superfamily
1492027	-4.44993	3.99e-72	product_name=hypothetical protein
1569097	-4.44864	0.0258842	product_name=Ankyrin repeat-containing domain protein
1503257	-4.44623	1.66e-05	product_name=RGS domain-containing protein
1518335	-4.44326	6.3e-15	product_name=hypothetical protein
1557658	-4.43639	3.07e-05	product_name=hypothetical protein
1582818	-4.43486	2.33e-109	product_name=hypothetical protein
1536357	-4.43372	2.79e-06	product_name=HotDog domain-containing protein
1543649	-4.43344	6.96e-06	product_name=adaptin N terminal region-domain-containing protein
1480015	-4.43252	1.29e-63	product_name=hypothetical protein
1508444	-4.42439	7.85e-101	product_name=hypothetical protein
1378134	-4.41979	7.81e-110	product_name=Ribonucleotide reductase%2C small chain-domain containing protein
1524941	-4.41289	2.03e-104	product_name=NUC169 domain-containing protein
1472060	-4.40711	1.54e-116	product_name=hypothetical protein
1476131	-4.40565	2.1e-70	product_name=hypothetical protein
1576042	-4.40387	0.000597433	product_name=P-loop containing nucleoside triphosphate hydrolase protein
1461324	-4.403	7.94e-44	product_name=hypothetical protein
1554817	-4.4001	1.47e-138	product_name=Helix-loop-helix DNA-binding domain-containing transcription factor|helix-loop-helix DNA-binding domain-containing transcription factor OAC98158.1 helix-loop-helix DNA-binding domain-containing transcription factor
1361204	-4.3983	5.13e-06	product_name=Basic-leucine zipper (bZIP) transcription factor|basic-leucine zipper transcription factor
1599552	-4.398	1.51e-36	product_name=Poly(A) polymerase central domain-containing protein
1533515	-4.38941	1.53e-118	product_name=Cupredoxin
1381926	-4.38913	9.05e-83	product_name=Class I glutamine amidotransferase-like protein
1372594	-4.3886	1.1e-80	product_name=Ribosome biogenesis regulatory protein (RRS1)-domain containing protein
1538134	-4.38829	0.0307921	product_name=hypothetical protein
1532793	-4.38739	4.89e-81	product_name=Aspartic peptidase domain-containing protein
1465858	-4.38032	1.19e-102	product_name=WD40-repeat-containing domain protein
1543378	-4.3723	5.05e-06	product_name=Mitochondrial carrier domain-containing protein
1552645	-4.37035	7.62e-89	product_name=hypothetical protein
1375680	-4.36966	2.11e-36	product_name=epressed protein
1482860	-4.36537	5.74e-36	product_name=Protein kinase-like domain-containing protein
1527021	-4.3643	0.00135995	product_name=hypothetical protein
1560227	-4.35786	2.09e-05	product_name=hypothetical protein
1480340	-4.35771	2.66e-49	product_name=TLC domain-domain containing protein
1572680	-4.35162	0.00139955	product_name=polysaccharide lyase|Polysaccharide Lyase Family 8 protein
1537713	-4.34057	1.93e-45	product_name=hypothetical protein
1473228	-4.33963	1.33e-107	product_name=hypothetical protein
1452228	-4.33905	0.00067268	product_name=Domain of unknown function DUF221-domain containing protein
1510693	-4.32782	1.15e-163	product_name=Retinoic acid induced 16-like protein-domain containing protein
1518839	-4.32442	3.72e-18	product_name=hypothetical protein
1465738	-4.3215	4.97e-98	product_name=rRNA processing protein Ebp2
1518758	-4.31671	6.47e-126	product_name=NUC091 domain-containing protein
1484192	-4.31229	4.97e-116	product_name=tetratricopeptide repeat protein 39B-like
1547023	-4.31024	1.51e-61	product_name=hypothetical protein
1453076	-4.3092	1.5e-149	product_name=hypothetical protein
1502735	-4.30102	1.97e-134	product_name=DEAD-domain-containing protein
1515134	-4.2922	5.93e-161	product_name=RlpA-like double-psi beta-barrel-protein domain-containing protein-containing protein
1587213	-4.28725	5.04e-49	product_name=hypothetical protein
1455347	-4.28208	0	product_name=IMP dehydrogenase/GMP reductase
1533021	-4.28162	2.33e-76	product_name=Septin-type guanine nucleotide-binding (G) domain-containing protein
1512391	-4.27815	4.98e-26	product_name=Rho GTPase activation protein
1369584	-4.2752	9.73e-53	product_name=hypothetical protein
1476307	-4.2729	0.034499	product_name=Homeodomain-like DNA binding domain-containing transcription factor
1513949	-4.27289	7.26e-35	product_name=Protein of unknown function (DUF3808)-domain containing protein
1516973	-4.2633	2.72e-15	product_name=Clathrin light chain
1501959	-4.25785	5.75e-61	product_name=hypothetical protein
1368475	-4.25685	4.13e-122	product_name=P-loop containing nucleoside triphosphate hydrolase protein
1552005	-4.2539	1.97e-07	product_name=V-type ATPase%2C V0 complex%2C 116kDa subunit family
1499672	-4.25367	0.0346098	product_name=hypothetical protein
1547503	-4.25292	1.44e-34	product_name=S-adenosyl-L-methionine-dependent methyltransferase
1530196	-4.25239	2.14e-10	product_name=glycosyltransferase family 2 protein
1497317	-4.25199	1.6e-10	product_name=hypothetical protein
1522160	-4.25137	3.32e-23	product_name=hypothetical protein
1588946	-4.24918	1.91e-15	product_name=chitin synthase-domain-containing protein
1482184	-4.24316	3.72e-35	product_name=hypothetical protein
1470240	-4.23914	2.68e-06	product_name=P-loop containing nucleoside triphosphate hydrolase protein
1481419	-4.23781	1.62e-80	product_name=C2H2-type Zinc finger transcription factor|C2H2-type zinc finger transcription factor OAC99572.1 C2H2-type zinc finger transcription factor
1467350	-4.23773	2.5e-67	product_name=hypothetical protein
1554823	-4.23468	9.48e-32	product_name=hypothetical protein
1346223	-4.23383	7.08e-17	product_name=Acyltransferase ChoActase/COT/CPT
1110744	-4.2219	0.0273366	product_name=hypothetical protein
1536093	-4.21658	1.31e-31	product_name=hypothetical protein
1591585	-4.21531	0.0289144	product_name=expressed protein
1167480	-4.2127	9.31e-106	product_name=hypothetical protein
1466174	-4.21199	1.79e-232	product_name=pyruvate kinase
1054703	-4.20971	4.31e-80	product_name=WD40-repeat-containing domain protein
1360452	-4.20968	5.07e-05	product_name=hypothetical protein
1535096	-4.20851	8.62e-121	product_name=fibrillarin
1541792	-4.2082	5.59e-124	product_name=CTP synthase N-terminus-domain containing protein
1551253	-4.20768	3.45e-148	product_name=kinase-like domain-containing protein
1520335	-4.20735	3.15e-87	product_name=hypothetical protein
1491721	-4.2073	5.73e-143	product_name=GDP-fucose protein O-fucosyltransferase
1469599	-4.20618	1.32e-183	product_name=hypothetical protein
1475329	-4.20124	1.37e-22	product_name=Anp1-domain containing protein
1365618	-4.20028	0.000592481	product_name=hypothetical protein
1443910	-4.19921	3.63e-115	product_name=hypothetical protein
1515886	-4.1912	1.12e-13	product_name=hypothetical protein
1354524	-4.1892	3.15e-106	product_name=WD40-repeat-containing domain protein
1058846	-4.18596	1.06e-19	product_name=hypothetical protein
1601434	-4.18005	5.81e-101	product_name=ATP-utilising Phosphoenolpyruvate carboxykinase
1478604	-4.17948	5.97e-44	product_name=hypothetical protein
1580768	-4.17335	3.8e-07	product_name=BTB/POZ domain-domain containing protein
1509360	-4.16681	3.11e-17	product_name=concanavalin A-like lectin/glucanase domain-containing protein
1509721	-4.15585	8.6e-40	product_name=presenilin family protein
1538143	-4.15358	1.11e-36	product_name=hypothetical protein
1451738	-4.15107	4.91e-44	product_name=hypothetical protein
1591725	-4.14785	0.000125687	product_name=hypothetical protein
1591401	-4.14558	1.33e-68	product_name=G protein beta subunit|G protein beta subunit OAD06917.1 G protein beta subunit
1511339	-4.14518	2.69e-112	product_name=Serine/Threonine kinase|Serine/Threonine kinase CK1
1522550	-4.14243	1.7e-08	product_name=ADP-ribosylation factor-like protein 8B
1333678	-4.13874	6.18e-49	product_name=hypothetical protein
1548165	-4.13822	3.9e-37	product_name=Metallo-dependent phosphatase-like protein
1389679	-4.13633	1.73e-108	product_name=hypothetical protein
1395861	-4.13507	1.75e-123	product_name=P-loop containing nucleoside triphosphate hydrolase protein
1590547	-4.13228	4.3e-95	product_name=ribosome 60S biogenesis N-terminal-domain-containing protein
1467657	-4.13067	9.66e-116	product_name=hypothetical protein
1475458	-4.12619	1.77e-06	product_name=hypothetical protein
1468417	-4.1246	1.96e-111	product_name=hypothetical protein
1481772	-4.11999	7.46e-78	product_name=hypothetical protein
1548471	-4.11813	1.86e-112	product_name=glycine dehydrogenase
1347865	-4.11665	1.31e-77	product_name=hypothetical protein
1524900	-4.11287	6.84e-89	product_name=hypothetical protein
1446232	-4.11169	8.06e-73	product_name=Alpha/beta knot methyltransferase
1502239	-4.10911	2.79e-75	product_name=WD40-repeat-containing domain protein
1556854	-4.10758	4.56e-75	product_name=FAS1 domain-containing protein
1596900	-4.10619	1.92e-18	product_name=hypothetical protein
1545026	-4.10504	3.78e-07	product_name=HAD-like domain-containing protein
1503002	-4.10456	4.56e-66	product_name=family 49 glycosyltransferase
1366194	-4.10445	1.58e-05	product_name=hypothetical protein
1586127	-4.1024	0.00402292	product_name=hypothetical protein
1454471	-4.10179	0.0194449	product_name=hypothetical protein
1390055	-4.09923	2.24e-89	product_name=surfeit locus protein 6-domain-containing protein
1546438	-4.09279	3.33e-90	product_name=hypothetical protein
1473364	-4.09038	0.0103108	product_name=apses-type HTH transcription regulator
1476501	-4.09002	1.98e-101	product_name=hypothetical protein
1476152	-4.08801	6.41e-124	product_name=Nrap protein
1530803	-4.08727	2.48e-90	product_name=hypothetical protein
1478500	-4.08678	1.78e-93	product_name=nucleolar complex protein
1501111	-4.08462	2.09e-144	product_name=hypothetical protein
1533010	-4.0831	9.61e-16	product_name=HotDog domain-containing protein
1433625	-4.08258	1.04e-07	product_name=expressed protein
1520282	-4.06912	9.03e-100	product_name=DNA-directed RNA polymerase%2C insert domain-containing protein
1451201	-4.06811	2.16e-147	product_name=hypothetical protein
1543456	-4.06578	4.53e-08	product_name=hypothetical protein
1489723	-4.06565	2.66e-66	product_name=Noc2p family-domain-containing protein
1557610	-4.0632	7.31e-89	product_name=major facilitator superfamily domain-containing protein
1508562	-4.06275	1.28e-122	product_name=DNA polymerase phi-domain-containing protein
1452060	-4.04237	1.28e-38	product_name=expressed protein
1518039	-4.04213	8.58e-105	product_name=RNA polymerase Rpb6
1386918	-4.03645	1.93e-77	product_name=WD40-repeat-containing domain protein
1552014	-4.03455	5.79e-94	product_name=hypothetical protein
1383741	-4.03093	7.06e-103	product_name=Mitochondrial carrier domain-containing protein
1359316	-4.02886	9.65e-30	product_name=hypothetical protein
1530915	-4.0241	2.35e-96	product_name=WD40-repeat-containing domain protein
1596875	-4.02233	1.66e-269	product_name=hypothetical protein
1549372	-4.01601	3.96e-75	product_name=rRNA processing/ribosome biogenesis-domain containing protein
1583212	-4.01096	1.97e-20	product_name=glycerol-3-phosphate acyltransferase Sct1
1521190	-4.00147	1.51e-05	product_name=hypothetical protein
1460957	-3.99676	9.69e-81	product_name=P-loop containing nucleoside triphosphate hydrolase protein
1468191	-3.99628	0.0439854	product_name=hypothetical protein
1524506	-3.99548	2.61e-36	product_name=CotH protein-domain containing protein
1446329	-3.99381	1.03e-79	product_name=ABC-2 type transporter-domain-containing protein
1466364	-3.98732	2.9e-56	product_name=hypothetical protein
1499760	-3.98726	2.4e-78	product_name=triose-phosphate transporter family-domain-containing protein
1510755	-3.98402	0.000792797	product_name=expressed protein
1454398	-3.98077	3.71e-17	product_name=hypothetical protein
1453987	-3.97802	5.22e-24	product_name=hypothetical protein
1533506	-3.96995	3.83e-96	product_name=Iron permease FTR1/Fip1/EfeU
1540216	-3.95484	8.2e-100	product_name=Bystin-domain-containing protein
1496978	-3.94947	6.36e-37	product_name=hypothetical protein
1553583	-3.94704	1.76e-144	product_name=Alpha/Beta hydrolase protein
1593451	-3.94682	3.78e-07	product_name=enoylCoA hydratase/isomerase
1481706	-3.94295	4.42e-41	product_name=hypothetical protein
1593471	-3.93771	1.15e-11	product_name=GroES (chaperonin 10)-like protein
1509285	-3.9263	6.88e-10	product_name=hypothetical protein
1581619	-3.92168	1.08e-08	product_name=hypothetical protein
1479208	-3.90851	9.99e-32	product_name=hypothetical protein
1350552	-3.90642	5.5e-99	product_name=Noc2p family-domain-containing protein
1357320	-3.89468	2.34e-07	product_name=Cys/Met metabolism PLP-dependent enzyme-domain containing protein
1568089	-3.88949	2.05e-117	product_name=RNA methyltransferase Nop2
1489540	-3.8888	2.48e-12	product_name=RTA1 like protein-domain containing protein
1518816	-3.88685	8.63e-11	product_name=Reticulon-domain containing protein
1374232	-3.88667	5.43e-05	product_name=ammonium transporter AmtB-like domain-containing protein
1492570	-3.88234	1.89e-93	product_name=RNA polymerase I associated factor%2C A49-like protein
1458152	-3.8785	7.19e-66	product_name=Ribosomal protein L24e-domain containing protein
1453776	-3.87793	1.34e-09	product_name=hypothetical protein
1364327	-3.876	1.45e-09	product_name=chitin synthase
1557646	-3.87566	4.46e-55	product_name=hypothetical protein
1447366	-3.87292	0.0122508	product_name=hypothetical protein
1463599	-3.87094	1.78e-09	product_name=Glycoside hydrolase superfamily
1528592	-3.86831	1.74e-103	product_name=expansin-YoaJ
1532375	-3.86607	0.000123836	product_name=class III chitinase
1508449	-3.86316	3.64e-68	product_name=Sas10/Utp3/C1D family-domain containing protein
1349946	-3.84991	2.1e-07	product_name=Ankyrin repeat-containing domain protein
1544072	-3.84914	1.07e-100	product_name=Quinonprotein alcohol dehydrogenase-like superfamily
1495110	-3.84773	4.44e-05	product_name=hypothetical protein
1499263	-3.84737	1.49e-101	product_name=hypothetical protein
1494321	-3.84644	4.78e-72	product_name=hypothetical protein
1374885	-3.83882	5.36e-61	product_name=RNA 3'-terminal phosphate cyclase domain-containing protein
1583595	-3.83486	1.41e-21	product_name=hypothetical protein
1513058	-3.83466	2e-07	product_name=expressed protein
1453474	-3.83326	6.93e-21	product_name=CAP domain-containing protein
1384767	-3.83251	1.88e-84	product_name=hypothetical protein
1513834	-3.82787	2.31e-102	product_name=hypothetical protein
1460297	-3.82649	3.5e-166	product_name=Protein of unknown function (DUF3759)-domain containing protein
1498325	-3.82123	7.49e-89	product_name=glycoside hydrolase family 18 protein
1472258	-3.81804	1.45e-83	product_name=Septin-domain containing protein
1527407	-3.81543	3.61e-94	product_name=Sas10 C-terminal domain-containing protein
1464428	-3.81465	8.02e-05	product_name=Domain of unknown function (DUF4203)-domain containing protein
1457883	-3.81385	2.45e-93	product_name=Blue light photoreceptor similar to cryptochrome DASH|DNA photolyase%2C FAD-binding/Cryptochrome
1395234	-3.81352	5.52e-87	product_name=hypothetical protein
1481364	-3.81322	3.39e-54	product_name=Tim17/Tim22/Tim23/Pmp24 family-domain containing protein
1499551	-3.81225	7.66e-77	product_name=hypothetical protein
1453374	-3.80927	3.42e-113	product_name=Armadillo-type fold
1476918	-3.80353	2.69e-75	product_name=hypothetical protein
1523474	-3.79974	1.29e-279	product_name=acyl-CoA thioester hydrolase
1391285	-3.79753	3.03e-104	product_name=50S ribosomal protein L30e-like protein
1456274	-3.79668	1.11e-24	product_name=alkaline-phosphatase-like protein
1596209	-3.7951	7.45e-69	product_name=Programmed cell death protein 2%2C C-terminal putative domain-domain containing protein
1500095	-3.79465	4.57e-09	product_name=hypothetical protein
1500038	-3.79113	2.98e-57	product_name=Carbonic anhydrase
1491717	-3.78046	2.63e-32	product_name=helix-loop-helix DNA-binding domain-containing transcription factor
1527940	-3.78029	1.46e-116	product_name=glycoside hydrolase|Glycoside Hydrolase Family 37 protein
1482274	-3.77834	1.04e-05	product_name=p53-like transcription factor|p53-like transcription factor OAC99485.1 p53-like transcription factor
1526638	-3.77746	4.2e-90	product_name=H+/nucleoside cotransporter
1528113	-3.77734	3.03e-85	product_name=WD40-repeat-containing domain protein
1592582	-3.77547	5.85e-83	product_name=Rix1 complex component
1450974	-3.7743	0.000903712	product_name=transcription factor Opi1-domain-containing protein
1477123	-3.772	2e-90	product_name=rRNA 2'-O-methyltransferase fibrillarin
1554083	-3.76326	8.05e-112	product_name=hypothetical protein
1484838	-3.76303	1.16e-09	product_name=Dolichyl-phosphate-mannose-protein mannosyltransferase-domain-containing protein
1532543	-3.76009	4.08e-82	product_name=Ribosome biogenesis protein Nop53/GLTSCR2
1387328	-3.75933	1.49e-52	product_name=aldehyde dehydrogenase domain-containing protein
1465656	-3.75774	5.51e-29	product_name=Peptidase S8/S53 domain-containing protein
1531586	-3.75196	1.7e-58	product_name=DUF1253 domain-containing protein
1341725	-3.74812	2.91e-37	product_name=SRP40%2C C-terminal domain-containing protein
1370097	-3.7465	1.5e-21	product_name=Helix-loop-helix DNA-binding domain-containing transcription factor|helix-loop-helix DNA-binding domain-containing transcription factor OAD07066.1 helix-loop-helix DNA-binding domain-containing transcription factor
1576785	-3.7458	3.58e-06	product_name=hypothetical protein
1467536	-3.74333	2.8e-50	product_name=hypothetical protein
1544675	-3.74182	5.74e-83	product_name=hypothetical protein
1500271	-3.73864	8.99e-45	product_name=hypothetical protein
1347010	-3.73601	4.98e-12	product_name=hypothetical protein
1507471	-3.73279	3.92e-08	product_name=hypothetical protein
1320314	-3.73245	5.57e-88	product_name=hypothetical protein
1538073	-3.73115	0.0103463	product_name=hypothetical protein
1526140	-3.73052	6.57e-56	product_name=ribosomal RNA small subunit methyltransferase
1377522	-3.71987	6.62e-73	product_name=WD40-repeat-containing domain protein
1510371	-3.71959	2.3e-118	product_name=P-loop containing nucleoside triphosphate hydrolase protein
1540632	-3.71756	6.02e-135	product_name=hypothetical protein
1530345	-3.7163	1.96e-93	product_name=hypothetical protein
1463295	-3.71037	3.76e-05	product_name=hypothetical protein
1359783	-3.70872	9.07e-55	product_name=hypothetical protein
1557725	-3.70592	3.14e-07	product_name=hypothetical protein
1379184	-3.70317	2.99e-91	product_name=hypothetical protein
1383313	-3.70089	1.05e-140	product_name=hypothetical protein
1382080	-3.6999	1e-105	product_name=class II peroxidase
1318131	-3.69918	0.00556817	product_name=expressed protein
1458586	-3.69443	9.74e-51	product_name=Rho GTPase activation protein
1457466	-3.69342	2.92e-13	product_name=hypothetical protein
1508822	-3.68155	5.95e-128	product_name=hypothetical protein
1526167	-3.6805	6.84e-36	product_name=ARF GTPase activating protein
1385014	-3.67498	1.33e-80	product_name=P-loop containing nucleoside triphosphate hydrolase protein
1483544	-3.67248	5.29e-57	product_name=ClpP/crotonase-like domain-containing protein
1378586	-3.67095	7.43e-13	product_name=hypothetical protein
1496505	-3.6625	1.13e-50	product_name=hypothetical protein
1515787	-3.66122	2.33e-99	product_name=hypothetical protein
1467026	-3.66005	5.15e-86	product_name=hypothetical protein
1536138	-3.65653	4.44e-171	product_name=hypothetical protein
1517048	-3.65373	3.92e-17	product_name=hypothetical protein
1393292	-3.65223	1.91e-23	product_name=Dihydrouridine synthase (Dus)-domain containing protein
1395063	-3.64242	8.34e-31	product_name=benzoquinone reductase
1490791	-3.63531	2.22e-222	product_name=hypothetical protein
1481893	-3.63332	1.36e-76	product_name=aldehyde dehydrogenase domain-containing protein
1478934	-3.62947	0.00824524	product_name=hypothetical protein
1336474	-3.62906	0.0040339	product_name=cyclin
1506696	-3.62623	1.34e-81	product_name=hypothetical protein
1470386	-3.62536	1.71e-95	product_name=hypothetical protein
1456043	-3.62382	5.45e-18	product_name=potassium:hydrogen antiporter protein
1480596	-3.61683	1.17e-32	product_name=hypothetical protein
1453722	-3.61681	3.89e-20	product_name=peptidase family M48-domain-containing protein
1383244	-3.61593	0.000259165	product_name=Glycosyl hydrolases family 18-domain containing protein
1471990	-3.61337	5.11e-12	product_name=PQ loop repeat-domain-containing protein
1454892	-3.6116	0.00107033	product_name=nucleotide-diphospho-sugar transferase
1337482	-3.60634	0.00562512	product_name=Metallo-dependent phosphatase-like protein
1442967	-3.6049	1.74e-85	product_name=hypothetical protein
1530819	-3.60208	2.57e-56	product_name=kinase-like protein
1485083	-3.59192	3.26e-77	product_name=hypothetical protein
1376005	-3.58948	1.48e-18	product_name=hypothetical protein
1364318	-3.58899	4.27e-05	product_name=hypothetical protein
1433615	-3.58797	3.9e-32	product_name=RlpA-like double-psi beta-barrel-protein domain-containing protein-containing protein
1372563	-3.58788	2.07e-60	product_name=hypothetical protein
1543245	-3.58423	1.9e-08	product_name=hypothetical protein
1348301	-3.58398	3.42e-97	product_name=hypothetical protein
1384248	-3.58376	4.94e-84	product_name=Protein of unknown function (DUF663)-domain containing protein
1504426	-3.58297	4.98e-67	product_name=hypothetical protein
1360245	-3.58073	2.68e-05	product_name=C2H2-type zinc finger transcription factor
1519907	-3.57781	1.76e-82	product_name=Biopterin-dependent aromatic amino acid hydroxylase-domain containing protein
1487590	-3.57629	3.62e-83	product_name=hypothetical protein
1465108	-3.55905	5.72e-07	product_name=isocitrate dehydrogenase|isocitrate dehydrogenase NAD-dependent Subunit 1
1369872	-3.55775	1.08e-86	product_name=GNAT acetyltransferase 2-domain-containing protein
1441302	-3.55742	0.000159006	product_name=hypothetical protein
1572488	-3.55585	1.83e-12	product_name=hypothetical protein
1468448	-3.54926	7.31e-09	product_name=NAD-dependent glycerol-3-phosphate dehydrogenase N-terminus-domain containing protein
1496926	-3.54825	1.02e-49	product_name=hypothetical protein
1462426	-3.54776	7.21e-55	product_name=NAD-dependent glycerol-3-phosphate dehydrogenase C-terminus-domain containing protein
1504151	-3.54593	1.19e-96	product_name=Pyridoxal phosphate-dependent transferase
1544364	-3.54547	1.35e-19	product_name=hypothetical protein
1482180	-3.54515	6.13e-88	product_name=Rhomboid family-domain containing protein
1587041	-3.54199	3.13e-86	product_name=hypothetical protein
1461850	-3.54008	1.45e-67	product_name=hypothetical protein
1586495	-3.53364	0.0328095	product_name=ribosomal protein S2%2C flavodoxin-like domain-containing protein
1464509	-3.53153	8.32e-62	product_name=hypothetical protein
1533160	-3.52889	0.000312087	product_name=Domain of unknown function (DUF4112)-domain containing protein
1584834	-3.52706	1.51e-91	product_name=Cys/Met metabolism PLP-dependent enzyme-domain containing protein
1448693	-3.52478	2.77e-111	product_name=hypothetical protein
1141391	-3.52162	5.18e-97	product_name=hypothetical protein
1510024	-3.51884	7.08e-73	product_name=hypothetical protein
1396454	-3.51838	6.48e-127	product_name=P-loop containing nucleoside triphosphate hydrolase protein
1369466	-3.51712	1.06e-51	product_name=hypothetical protein
1555750	-3.51674	3.71e-76	product_name=WD40-repeat-containing domain protein
1471373	-3.516	7.23e-69	product_name=ankyrin repeat-containing domain protein
1508379	-3.51531	2.76e-87	product_name=RNA-binding domain-containing protein
1525042	-3.50724	1.73e-85	product_name=P-loop containing nucleoside triphosphate hydrolase protein
1596453	-3.5029	0.0280914	product_name=General substrate transporter
1478761	-3.50286	7.95e-87	product_name=Spb1 C-terminal domain-domain containing protein
1496226	-3.50227	1.83e-39	product_name=kinase-like domain-containing protein
1511848	-3.49251	3.46e-72	product_name=hypothetical protein
1354395	-3.48727	0.0287429	product_name=hypothetical protein
1381524	-3.48549	9.6e-98	product_name=hypothetical protein
1368542	-3.48544	4.41e-112	product_name=hypothetical protein
1369521	-3.48332	4.3e-60	product_name=hypothetical protein
1557085	-3.48238	3.07e-40	product_name=Ras guanine nucleotide exchange factor domain-containing protein
1494209	-3.47646	2.38e-10	product_name=Cytidine deaminase-like protein
1492001	-3.47202	9.37e-25	product_name=Acyl-CoA dehydrogenase/oxidase%2C N-terminal and middle domain-containing protein
1476952	-3.47149	3.71e-118	product_name=hypothetical protein
1534282	-3.46987	1.87e-84	product_name=Pseudouridine synthase
1487296	-3.46665	3.01e-09	product_name=Domain of unknown function DUF221-domain containing protein
1457179	-3.46549	3.58e-49	product_name=P-loop containing nucleoside triphosphate hydrolase protein
1374421	-3.45897	5.19e-62	product_name=IQ domain-containing protein
1370017	-3.45835	1.65e-10	product_name=Carbohydrate-Binding Module Family 13 protein|carbohydrate-binding module family 13 protein OAD07037.1 carbohydrate-binding module family 13 protein
1526856	-3.45776	3.81e-46	product_name=hypothetical protein
1480634	-3.45604	1.64e-212	product_name=hypothetical protein
1394291	-3.45604	0.000290452	product_name=hypothetical protein
1566879	-3.44952	1.33e-18	product_name=hypothetical protein
1465376	-3.44781	2.11e-61	product_name=Domain of unkown function (DUF1775)-domain containing protein
1364265	-3.44607	4.37e-28	product_name=hypothetical protein
1524223	-3.44506	7.96e-11	product_name=expressed protein
1464477	-3.44357	6.17e-06	product_name=hypothetical protein
1481290	-3.4398	2.51e-16	product_name=hypothetical protein
1410353	-3.43827	0.0482202	product_name=hypothetical protein
1465721	-3.43782	1.18e-76	product_name=NUC173 domain-containing protein
1589547	-3.43715	1.24e-37	product_name=Ribosomal protein L24e-domain containing protein
1354959	-3.43498	2.12e-05	product_name=hypothetical protein
1541805	-3.43339	2.22e-53	product_name=sec7 domain-containing protein
1495974	-3.43316	3.14e-122	product_name=glycosyltransferase|Glycosyltransferase Family 22 protein
1477598	-3.42777	1.41e-22	product_name=hypothetical protein
1356221	-3.42524	0.00130853	product_name=hypothetical protein
1582869	-3.42038	1.54e-06	product_name=rab-GTPase-TBC domain-containing protein
1477376	-3.41991	3.82e-35	product_name=hypothetical protein
1507703	-3.41673	1.93e-37	product_name=fungal-specific transcription factor domain-containing protein
1531873	-3.40378	1.41e-07	product_name=cytochrome P450
1488753	-3.39901	1.42e-77	product_name=Urb2/Npa2 family-domain containing protein
1500586	-3.39473	3.81e-82	product_name=U3 small nucleolar RNA-associated protein 6-domain-containing protein
1470048	-3.39447	2.1e-79	product_name=MCM2/3/5 family-domain containing protein
1527416	-3.39436	7.01e-73	product_name=P-loop containing nucleoside triphosphate hydrolase protein
1545922	-3.39192	6.4e-69	product_name=hypothetical protein
1437683	-3.38913	0.00944629	product_name=expressed protein
1545262	-3.38869	1.28e-43	product_name=Ras family-domain containing protein
1322491	-3.38607	0.00097525	product_name=helix-loop-helix DNA-binding domain-containing transcription factor
1471814	-3.38438	1.22e-53	product_name=hypothetical protein
1350034	-3.38315	1.66e-83	product_name=mitochondrial carrier domain-containing protein
1514476	-3.38202	4.76e-48	product_name=hypothetical protein
1579282	-3.3753	1.09e-28	product_name=expressed protein
1360061	-3.36936	2.19e-46	product_name=hypothetical protein
1522210	-3.3681	8.43e-67	product_name=WD40-repeat-containing domain protein
1341565	-3.36243	1.2e-20	product_name=hypothetical protein
1478208	-3.36001	7.31e-10	product_name=hypothetical protein
1503627	-3.35587	4.37e-55	product_name=hypothetical protein
1526742	-3.35468	4.12e-56	product_name=Oxoglutarate and iron-dependent oxygenase degradation C-term-domain containing protein
1532036	-3.35091	3.03e-53	product_name=hypothetical protein
1513023	-3.34657	2.95e-56	product_name=RNA-binding domain-containing protein
1557673	-3.34304	3.11e-64	product_name=P-loop containing nucleoside triphosphate hydrolase protein
1391229	-3.34144	1.43e-35	product_name=tRNA methyltransferase complex GCD14 subunit-domain-containing protein
1459039	-3.34124	2.34e-15	product_name=hypothetical protein
1491480	-3.3403	2.75e-94	product_name=hypothetical protein
1321731	-3.33671	0.0397452	product_name=hypothetical protein
1589520	-3.3361	0.0534149	product_name=hypothetical protein
1550427	-3.33244	8.65e-74	product_name=hypothetical protein
1500658	-3.33078	0.0239245	product_name=hypothetical protein
1344997	-3.32992	6.1e-05	product_name=hypothetical protein
1444183	-3.32968	9.09e-55	product_name=U3 small nucleolar ribonucleo protein complex%2C subunit Mpp10
1496248	-3.32872	1.69e-56	product_name=DNA-directed RNA polymerase
1473780	-3.32848	5.1e-85	product_name=TLC domain-domain containing protein
1493752	-3.3268	0.00021761	product_name=hypothetical protein
1363977	-3.32588	0.0198937	product_name=hypothetical protein
1346716	-3.32283	1.29e-56	product_name=hypothetical protein
1354679	-3.32208	4.38e-11	product_name=acyl CoA binding protein-domain-containing protein
1156345	-3.32181	9.38e-77	product_name=hypothetical protein
1499148	-3.32163	6.9e-58	product_name=Protein of unknown function (DUF1394)-domain containing protein
1566005	-3.31858	9.26e-08	product_name=hypothetical protein
1537158	-3.31563	1e-80	product_name=cortical protein marker for cell polarity-domain-containing protein
1519473	-3.30901	5.72e-07	product_name=inositol oxygenase
1482760	-3.30729	3.66e-44	product_name=hypothetical protein
1349376	-3.30507	1.8e-51	product_name=Ribosome biogenesis protein Nop16
1486677	-3.30461	3.39e-68	product_name=Gcd10p family-domain containing protein
1601359	-3.30166	1.59e-52	product_name=hypothetical protein
1448092	-3.30138	1.79e-21	product_name=Helix-loop-helix DNA-binding domain-containing transcription factor|helix-loop-helix DNA-binding domain-containing transcription factor OAD08107.1 helix-loop-helix DNA-binding domain-containing transcription factor
1511196	-3.29976	7.56e-76	product_name=Protein of unknown function (DUF663)-domain containing protein
1453576	-3.29525	5.04e-53	product_name=hypothetical protein
1435031	-3.295	1.04e-05	product_name=Periplasmic binding protein-like I
1492187	-3.2936	7.36e-10	product_name=hypothetical protein
1330980	-3.2908	1.7e-26	product_name=Homeodomain-like protein
1502130	-3.29029	1.7e-09	product_name=Serine/threonine kinase hybrid HK
1433443	-3.29008	0.00637245	product_name=hypothetical protein
1516580	-3.28781	8.34e-49	product_name=Domain of unknown function (DUF1771)-domain containing protein
1492564	-3.28686	1.4e-84	product_name=S-adenosyl-L-methionine-dependent methyltransferase
1373264	-3.2823	4.39e-38	product_name=Ribosomal protein S5 domain 2-type fold
1376789	-3.28173	3.26e-96	product_name=Armadillo-type fold
1508281	-3.28055	2.51e-36	product_name=ABC-2 type transporter-domain-containing protein
1495176	-3.27549	1.99e-62	product_name=uracil-DNA glycosylase-like protein
1345409	-3.27542	2.63e-06	product_name=P-loop containing nucleoside triphosphate hydrolase protein
1490863	-3.27327	3.83e-39	product_name=hypothetical protein
1570453	-3.27198	4.78e-07	product_name=hypothetical protein
1540464	-3.27149	3.58e-09	product_name=phosphatidylserine decarboxylase-domain-containing protein
1528036	-3.26969	4.84e-07	product_name=Cortical protein marker for cell polarity-domain containing protein
1495645	-3.26635	5.38e-31	product_name=cytochrome P450
1499548	-3.26548	0.0410157	product_name=G protein alpha subunit|G protein alpha subunit OAD05524.1 G protein alpha subunit
1531060	-3.26477	2.15e-71	product_name=hypothetical protein
1474666	-3.26435	2.88e-25	product_name=phytoene dehydrogenase
1353195	-3.26398	1.42e-08	product_name=hypothetical protein
1473889	-3.25974	6.27e-62	product_name=hypothetical protein
1542151	-3.25905	1.47e-92	product_name=Armadillo-type fold
1524471	-3.25833	1.78e-23	product_name=Adenosine deaminase/editase|Regulator of development and secondary metabolism of the velvet family. Similar to VosA
1446346	-3.24981	0.00139698	product_name=hypothetical protein
1485927	-3.24872	6.44e-52	product_name=Anticodon-binding protein
1442415	-3.24697	0.00461807	product_name=hypothetical protein
1368492	-3.2457	7.46e-82	product_name=P-loop containing nucleoside triphosphate hydrolase protein
1548828	-3.24484	4.24e-71	product_name=Pmk1 MAPK|Protein kinase-like domain-containing protein
1458917	-3.237	1.63e-80	product_name=S-adenosyl-L-methionine-dependent methyltransferase
1448896	-3.23579	1.95e-30	product_name=hypothetical protein
1571975	-3.23513	0.0324829	product_name=hypothetical protein
1501103	-3.23254	1.09e-55	product_name=Small GTPase superfamily
1449027	-3.23108	1.41e-29	product_name=expressed protein
1416449	-3.22912	1.14e-35	product_name=hypothetical protein
1545955	-3.22782	4.47e-59	product_name=expressed protein
1601029	-3.2256	1.71e-49	product_name=hypothetical protein
1138192	-3.22389	0.00017548	product_name=hypothetical protein
1554507	-3.22352	0.000709513	product_name=expressed protein
1588845	-3.22278	2.94e-66	product_name=ribonuclease H-like domain-containing protein
1485399	-3.21546	2.85e-83	product_name=hypothetical protein
1494035	-3.21503	1.68e-54	product_name=CBF/Mak21 family-domain-containing protein
1482230	-3.21389	5.38e-33	product_name=hypothetical protein
1493009	-3.21297	1.06e-66	product_name=hypothetical protein
1455797	-3.21072	0.00283241	product_name=P-loop containing nucleoside triphosphate hydrolase protein
1588464	-3.20398	2.71e-104	product_name=caspase domain-containing protein
1596977	-3.19999	1.49e-57	product_name=SDA1-domain-containing protein
1555080	-3.19857	8.32e-29	product_name=Got1/Sft2-like family-domain containing protein
1490736	-3.1982	1.28e-06	product_name=hypothetical protein
1516804	-3.19697	1.16e-11	product_name=Eisosome component PIL1-domain-containing protein
1499595	-3.19264	9.34e-134	product_name=Isocitrate lyase
1477384	-3.18901	2.54e-25	product_name=hypothetical protein
1543283	-3.18685	6.14e-28	product_name=Methyltransferase domain-domain containing protein
1538263	-3.18428	6.72e-52	product_name=FK506-binding protein 2A
1498381	-3.18382	2.58e-87	product_name=hypothetical protein
1347260	-3.1826	1.71e-68	product_name=hypothetical protein
1468346	-3.17995	2.72e-37	product_name=hypothetical protein
1533943	-3.17888	1.97e-96	product_name=hypothetical protein
1541309	-3.17744	4.08e-13	product_name=hypothetical protein
1469352	-3.17525	2.25e-64	product_name=kinase-like domain-containing protein
1505298	-3.17502	3.87e-172	product_name=hypothetical protein
1144134	-3.17492	0.00207309	product_name=hypothetical protein
1549499	-3.1742	4.35e-64	product_name=hypothetical protein
1516403	-3.17022	0.0178337	product_name=hypothetical protein
1470027	-3.16859	2.26e-70	product_name=Eukaryotic translation initiation factor 3 subunit D
1516139	-3.16818	9e-64	product_name=2-oxoacid dehydrogenases acyltransferase (catalytic domain)-domain containing protein
1373618	-3.16422	8.82e-71	product_name=Pyridoxal phosphate-dependent transferase
1457107	-3.16105	3.7e-112	product_name=PUA-like domain-containing protein|Putative ubiquitin ligase similar to CrgA
1489870	-3.15901	5.19e-52	product_name=Velvet factor-domain containing protein
1479948	-3.15649	0.0486752	product_name=hypothetical protein
1533916	-3.15379	4e-66	product_name=P-loop containing nucleoside triphosphate hydrolase protein
1536150	-3.15007	1.21e-66	product_name=WD40-repeat-containing domain protein
1441218	-3.14962	1.17e-22	product_name=expressed protein
1455299	-3.14903	3.19e-67	product_name=Eukaryotic elongation factor 5A hypusine%2C DNA-binding OB fold-domain containing protein
1461755	-3.14842	7.42e-79	product_name=Glutamate/Leucine/Phenylalanine/Valine dehydrogenase-domain containing protein
1523996	-3.14671	1.73e-58	product_name=P-loop containing nucleoside triphosphate hydrolase protein
1509823	-3.14644	9.67e-37	product_name=hypothetical protein
1496982	-3.14333	2.03e-108	product_name=hypothetical protein
1385030	-3.14291	2.21e-104	product_name=Mitochondrial carrier domain-containing protein
1469624	-3.14119	8.74e-49	product_name=putative 60S ribosomal protein L27A
1525938	-3.13899	6.89e-126	product_name=Cytochrome P450
1508167	-3.13581	5.29e-11	product_name=carbohydrate esterase family 4 protein
1510886	-3.13275	1.47e-89	product_name=S-adenosyl-L-methionine-dependent methyltransferase
1359117	-3.12058	0.0171337	product_name=glycoside hydrolase|Glycoside Hydrolase Family 16 protein
1523144	-3.11703	1.82e-64	product_name=hypothetical protein
1465240	-3.11613	2.63e-96	product_name=hypothetical protein
1472724	-3.11021	5.59e-05	product_name=hypothetical protein
1334600	-3.10883	1.22e-66	product_name=Septin-domain containing protein
1599618	-3.10635	3.43e-06	product_name=cell cycle inhibitor nif1 protein
1552420	-3.09959	1.51e-82	product_name=hypothetical protein
1457102	-3.09618	1.54e-38	product_name=hypothetical protein
1457700	-3.09533	3.03e-34	product_name=Protein kinase-like domain-containing protein
1061866	-3.09461	0.00807263	product_name=WD40-repeat-containing domain protein
1536065	-3.09122	4.31e-51	product_name=P-loop containing nucleoside triphosphate hydrolase protein
1473065	-3.08875	4.91e-05	product_name=hypothetical protein
1454618	-3.08794	1.01e-57	product_name=hypothetical protein
1466053	-3.08792	3.39e-64	product_name=hypothetical protein
1448453	-3.0875	2.28e-48	product_name=hypothetical protein
1396117	-3.08585	2.3e-84	product_name=hypothetical protein
1533575	-3.0848	7.65e-54	product_name=P-loop containing nucleoside triphosphate hydrolase protein
1566063	-3.08155	5.09e-27	product_name=hypothetical protein
1469208	-3.08014	2.87e-69	product_name=hypothetical protein
1594000	-3.07597	1.36e-17	product_name=hypothetical protein
1377941	-3.07503	3.07e-06	product_name=CRAL-TRIO domain-containing protein
1412731	-3.07278	1.93e-79	product_name=SNF2 family N-terminal domain-containing protein
1349083	-3.07194	2.85e-108	product_name=RNA polymerase I specific transcription initiation factor RRN3
1341498	-3.07173	8.95e-68	product_name=hypothetical protein
1512527	-3.06841	5.02e-94	product_name=60 kDa lysophospholipase-like
1490244	-3.06803	4.16e-07	product_name=chitin deacetylase
1534504	-3.06326	1.75e-63	product_name=WD40-repeat-containing domain protein
1578714	-3.06238	0.0314027	product_name=hypothetical protein
1457119	-3.06109	5.33e-47	product_name=Apoptosis antagonizing transcription factor-domain containing protein
1504691	-3.06078	8.3e-54	product_name=Peroxisomal biogenesis factor 11
1378100	-3.05635	2.72e-81	product_name=Protein kinase-like domain-containing protein
1377806	-3.05566	4.97e-38	product_name=tRNA synthetases class I %28I%2C L%2C M and V%29-domain containing protein
1593501	-3.05437	0.0421621	product_name=hypothetical protein
1505399	-3.0495	2.78e-56	product_name=hypothetical protein
1327299	-3.04888	0.026102	product_name=hypothetical protein
1517699	-3.04646	0.000609085	product_name=P-loop containing nucleoside triphosphate hydrolase protein
1366687	-3.04515	0.0375663	product_name=phosphoesterase family-domain-containing protein
1523712	-3.04466	7.96e-63	product_name=hypothetical protein
1566725	-3.04413	2.28e-61	product_name=hypothetical protein
1508224	-3.04377	1.03e-186	product_name=hypothetical protein
1484590	-3.04302	5.36e-71	product_name=hypothetical protein
1520255	-3.03857	1.68e-46	product_name=Ras-like protein 1
1152884	-3.03628	0.0524095	product_name=hypothetical protein
1575436	-3.03071	1.04e-05	product_name=hypothetical protein
1358140	-3.02322	6.92e-25	product_name=hypothetical protein
1116047	-3.0225	8.59e-97	product_name=hypothetical protein
1015056	-3.02055	0.0445525	product_name=hypothetical protein
1365502	-3.0174	2.5e-05	product_name=hypothetical protein
1517295	-3.01735	3.7e-48	product_name=hypothetical protein
1597263	-3.01602	1.96e-61	product_name=hypothetical protein
1480113	-3.01405	1.18e-51	product_name=hypothetical protein
1494336	-3.01334	0.000341208	product_name=hypothetical protein
1390652	-3.00999	7.75e-46	product_name=hypothetical protein
1474008	-3.00912	2.32e-67	product_name=hypothetical protein
1535864	-3.00806	2.16e-51	product_name=SMAD/FHA domain-containing protein
1319968	-3.00733	1.67e-07	product_name=Alpha/Beta hydrolase protein
1500312	-3.0062	3e-58	product_name=DNA-directed RNA polymerase I
1352372	-3.0049	2.44e-10	product_name=Carboxyl transferase
1390768	-3.0033	9.23e-66	product_name=Septin-domain containing protein
1494920	-3.00273	3.44e-71	product_name=Scd6-like Sm domain-containing protein
1450323	-2.99125	0.047969	product_name=major facilitator superfamily domain-containing protein
1442994	-2.98937	1.65e-05	product_name=hypothetical protein
1518532	-2.98805	1.31e-45	product_name=Phosphoribosyltransferase-like protein
1324426	-2.98592	9.05e-76	product_name=DNA-directed RNA polymerase I subunit RPA2
1452939	-2.97714	2.74e-125	product_name=tRNA synthetases class I%2C catalytic domain-containing protein
1534357	-2.97577	0.00317907	product_name=expressed protein
1556703	-2.97387	1.07e-16	product_name=hypothetical protein
1532518	-2.96922	4.81e-67	product_name=chitin synthase
1519586	-2.96462	0.000377626	product_name=hypothetical protein
1457033	-2.96037	1.54e-12	product_name=Small GTPase superfamily
1376699	-2.95758	0.00760629	product_name=hypothetical protein
1486915	-2.95735	5.05e-25	product_name=rab-GTPase-TBC domain-containing protein
1379970	-2.95301	1.63e-18	product_name=hypothetical protein
1482333	-2.95106	2.92e-117	product_name=hypothetical protein
1447950	-2.94964	3.11e-05	product_name=hypothetical protein
1519912	-2.94689	4.71e-19	product_name=hypothetical protein
1584923	-2.94555	1.21e-37	product_name=hypothetical protein
1552111	-2.93997	1.31e-118	product_name=hypothetical protein
1508020	-2.93868	0.00700708	product_name=hypothetical protein
1455318	-2.93799	2.96e-54	product_name=ABC transporter transmembrane region 2-domain-containing protein
1378081	-2.93659	1.4e-16	product_name=hypothetical protein
1530811	-2.93647	7.57e-28	product_name=1-acylglycerol-3-phosphate acyltransferase protein
1372134	-2.93622	9.31e-30	product_name=DTW domain-domain containing protein
1526143	-2.93493	1.17e-39	product_name=Acyl-CoA N-acyltransferase
1496831	-2.93364	0.000885411	product_name=hypothetical protein
1347812	-2.93333	9.25e-05	product_name=hypothetical protein
1453008	-2.92321	6.18e-81	product_name=Phosphoribosyltransferase-like protein
1476915	-2.91726	7.25e-17	product_name=ATP11%2C mitochondrial F1-ATPase|ATP11%2C Mitochondrial F1-ATPase assembly protein
1537999	-2.9151	2.77e-51	product_name=hypothetical protein
1557000	-2.915	1.55e-46	product_name=NAD binding domain of 6-phosphogluconate dehydrogenase-domain containing protein
1577337	-2.91348	8.21e-15	product_name=hypothetical protein
1389865	-2.91234	7.28e-53	product_name=beta and beta-prime subunits of DNA dependent RNA-polymerase
1448191	-2.91204	0.000120138	product_name=hypothetical protein
1485215	-2.90997	3.42e-89	product_name=Aspartic peptidase domain-containing protein
1554333	-2.90765	2.97e-58	product_name=armadillo-type protein
1489172	-2.90504	5.53e-57	product_name=hypothetical protein
1176600	-2.90471	1.29e-73	product_name=hypothetical protein
1505838	-2.90454	3.88e-52	product_name=hypothetical protein
1587078	-2.90164	5.29e-30	product_name=Small acidic protein family-domain containing protein
1537462	-2.89881	8.96e-47	product_name=RIO1-domain-containing protein
1533932	-2.89866	1.72e-06	product_name=glycoside hydrolase family 3 protein
1457453	-2.89789	2.61e-69	product_name=hypothetical protein
1388684	-2.89516	6.48e-05	product_name=fork head domain-containing protein
1468260	-2.89262	7.14e-13	product_name=aspartic peptidase domain-containing protein
1325435	-2.8904	0.00407586	product_name=Small GTPase superfamily
1363300	-2.88964	7.99e-84	product_name=Armadillo-type fold
1446075	-2.88741	1.98e-58	product_name=hypothetical protein
1539798	-2.88613	2.43e-50	product_name=hypothetical protein
1549544	-2.88516	2.86e-71	product_name=glycosyltransferase family 39 protein
1386453	-2.88385	0.00500331	product_name=hypothetical protein
1487804	-2.88353	7.06e-44	product_name=Alkaline-phosphatase-like%2C core domain-containing protein
1372550	-2.88189	2.61e-28	product_name=Ankyrin repeat-containing domain protein
1391804	-2.87604	0.0403156	product_name=C2H2-type zinc finger transcription factor
1600632	-2.87223	1.93e-69	product_name=glycine cleavage system protein T
1568082	-2.87217	2.58e-05	product_name=C2H2-type zinc finger transcription factor
1456020	-2.87149	4.88e-64	product_name=hypothetical protein
1522048	-2.87135	3.06e-70	product_name=hypothetical protein
1463491	-2.87019	6.02e-82	product_name=eukaryotic translation initiation factor 3 subunit 8 N-terminus-domain-containing protein
1537817	-2.86749	2.25e-66	product_name=PAK family of Ser/Thr protein kinase
1476301	-2.86102	2.35e-43	product_name=C2H2-type zinc finger transcription factor
1391043	-2.86081	5.96e-63	product_name=spermatogenesis-associated protein 5
1565943	-2.85934	8.69e-10	product_name=hypothetical protein
1544457	-2.85891	1.45e-36	product_name=hypothetical protein
1346466	-2.85666	0.0373738	product_name=Arginase family-domain containing protein
1508554	-2.85656	0.0333606	product_name=Domain of unknown function (DUF4203)-domain containing protein
1383483	-2.85589	8.5e-53	product_name=RIO1 family-domain-containing protein
1470520	-2.85346	3.7e-51	product_name=P-loop containing nucleoside triphosphate hydrolase protein
1542425	-2.85333	2.67e-41	product_name=GNL3L/Grn1 putative GTPase-domain containing protein
1537144	-2.85117	1.11e-05	product_name=C2H2-type Zinc finger transcription factor|C2H2-type zinc finger transcription factor OAD05699.1 C2H2-type zinc finger transcription factor
1444133	-2.84804	6.3e-18	product_name=hypothetical protein
1351920	-2.84664	5.93e-09	product_name=hypothetical protein
1557448	-2.84472	4.04e-65	product_name=MCM2/3/5 family-domain containing protein
1536371	-2.84454	5.46e-57	product_name=Phosphoesterase family-domain containing protein
1530118	-2.84378	5.88e-92	product_name=Armadillo-type fold
1544353	-2.84363	5.33e-176	product_name=Thi4 family-domain containing protein
1538080	-2.84362	0.0423928	product_name=hypothetical protein
1472727	-2.84187	1.68e-98	product_name=Dynamin central region-domain containing protein
1596286	-2.84182	9.1e-61	product_name=hypothetical protein
1373922	-2.83771	0.00100008	product_name=hypothetical protein
1480695	-2.83718	4.49e-37	product_name=hypothetical protein
1456576	-2.83422	3.26e-47	product_name=Fructose-1%2C6-bisphosphatase class 1/Sedoheputulose-1%2C7-bisphosphatase
1367844	-2.83249	9.89e-46	product_name=hypothetical protein
1357279	-2.83087	0.0243878	product_name=Cytidine deaminase-like protein
1585644	-2.8303	0.00518232	product_name=SUR7/PalI family-domain-containing protein
1601518	-2.83005	0.00833828	product_name=DIL domain-containing protein
1454281	-2.82789	7.15e-12	product_name=Putative methyltransferase-domain containing protein
1474686	-2.82759	7.54e-06	product_name=hypothetical protein
1480992	-2.82544	0.000253675	product_name=hypothetical protein
1488672	-2.82544	2.99e-61	product_name=hypothetical protein
1172053	-2.82524	1.39e-19	product_name=FtsJ-like methyltransferase-domain containing protein
1528165	-2.82387	3.67e-57	product_name=hypothetical protein
1475859	-2.8237	1.13e-17	product_name=hypothetical protein
1470338	-2.82046	1.17e-65	product_name=hypothetical protein
1350091	-2.8202	2.43e-32	product_name=Nucleolar
1474423	-2.81733	0.00600535	product_name=Protein of unknown function (DUF1394)-domain containing protein
1488549	-2.81689	1.21e-71	product_name=SecY subunit domain-containing protein
1377103	-2.81564	9.91e-17	product_name=Regulator of development and secondary metabolism of the velvet family. Similar to VelB/VelC|Velvet factor-domain containing protein
1540670	-2.81527	3e-05	product_name=Armadillo-type fold
1533294	-2.8127	2.23e-25	product_name=hypothetical protein
1452591	-2.81127	5.01e-06	product_name=Uracil-DNA glycosylase-like protein
1556474	-2.80727	4.16e-05	product_name=hypothetical protein
1476551	-2.80566	5.72e-45	product_name=hypothetical protein
1486987	-2.79866	4.64e-18	product_name=hypothetical protein
1481704	-2.79806	1.05e-20	product_name=hypothetical protein
1596305	-2.79589	5.61e-59	product_name=hypothetical protein
1506137	-2.79343	6.87e-06	product_name=OPT family small oligopeptide transporter
1545368	-2.79311	1.77e-72	product_name=PLC-like phosphodiesterase%2C TIM beta/alpha-barrel-containing protein domain-containing protein
1510003	-2.79239	1.57e-89	product_name=WD40-repeat-containing domain protein
1367862	-2.79139	6.8e-63	product_name=Eukaryotic translation initiation factor eIF2A-domain containing protein
1502125	-2.78984	5.71e-55	product_name=B-type amino acid transporter 1-like
1503858	-2.78558	3.9e-41	product_name=Acyl-CoA N-acyltransferase
1326131	-2.78229	0.00523613	product_name=hypothetical protein
1546338	-2.77931	1.3e-53	product_name=rhoGAP-domain-containing protein
1489672	-2.77837	0.0268659	product_name=hypothetical protein
1496515	-2.77637	7.4e-55	product_name=t-SNARE
1350651	-2.77594	2.79e-43	product_name=Eukaryotic phosphomannomutase
1508544	-2.77491	4.43e-66	product_name=translation initiation factor RLI1
1490368	-2.77462	4.7e-19	product_name=hypothetical protein
1487538	-2.7681	1.14e-07	product_name=tRNA synthetases class I %28I%2C L%2C M and V%29-domain containing protein
1370719	-2.76387	2.94e-52	product_name=minichromosome maintenance protein 2
1358824	-2.75756	1e-14	product_name=guanine nucleotide binding protein
1455676	-2.75555	1.04e-08	product_name=cora-domain-containing protein
1601631	-2.75015	2.09e-68	product_name=kinase-like domain-containing protein
1525275	-2.74686	0.0198856	product_name=ssDNA-binding transcriptional regulator|ssDNA-binding transcriptional regulator OAD03964.1 ssDNA-binding transcriptional regulator
1487265	-2.74626	6.31e-67	product_name=Dynein light intermediate chain (DLIC)-domain containing protein
1465569	-2.74563	4.89e-83	product_name=delta-6-fatty acid desaturase
1543640	-2.74473	6.94e-30	product_name=rab-GTPase-TBC domain-containing protein
1372410	-2.73975	6.81e-64	product_name=Manganese/iron superoxide dismutase
1379809	-2.73448	3.19e-26	product_name=Small-subunit processome
1456599	-2.73271	1.03e-12	product_name=mitochondrial carrier domain-containing protein
1511829	-2.73052	1.74e-53	product_name=hypothetical protein
1465736	-2.72931	1.17e-13	product_name=hypothetical protein
1395496	-2.7268	3.26e-49	product_name=hypothetical protein
1587470	-2.72125	1.91e-61	product_name=serine hydroxymethyltransferase-domain-containing protein
1466162	-2.71875	0.000142509	product_name=hypothetical protein
1535605	-2.71814	7.59e-43	product_name=Brix domain-domain containing protein
1539157	-2.71811	7.08e-62	product_name=hypothetical protein
1375711	-2.71571	3.73e-85	product_name=hypothetical protein
1511764	-2.71506	7.58e-14	product_name=hypothetical protein
1448407	-2.71097	1.9e-05	product_name=G protein alpha subunit
1512098	-2.7109	2.66e-52	product_name=RNA polymerase III subunit RPC82-domain containing protein
1523916	-2.71084	5.88e-13	product_name=PAP2 superfamily C-terminal-domain-containing protein
1468290	-2.7106	1.8e-14	product_name=kinase-like domain-containing protein
1490916	-2.71017	1.47e-07	product_name=P-loop containing nucleoside triphosphate hydrolase protein
1496199	-2.70984	8.76e-67	product_name=hypothetical protein
1455331	-2.70927	2.55e-41	product_name=S-adenosyl-L-methionine-dependent methyltransferase
1579641	-2.70875	0.0342349	product_name=hypothetical protein
1388883	-2.70783	0.0423073	product_name=chitinase
1476868	-2.70542	2.88e-94	product_name=Nucleotide-diphospho-sugar transferase
1511347	-2.70359	3.37e-30	product_name=Chromatin assembly factor 1 subunit A-domain containing protein
1456497	-2.70356	1.64e-09	product_name=Small GTPase superfamily
1327071	-2.70293	1.69e-11	product_name=hypothetical protein
1488663	-2.70159	1.83e-41	product_name=hypothetical protein
1536729	-2.70107	3.25e-27	product_name=pseudouridine synthase
1514329	-2.69735	1.74e-62	product_name=hypothetical protein
1593045	-2.69444	6.4e-07	product_name=hypothetical protein
1586997	-2.69317	0.00915418	product_name=P-loop containing nucleoside triphosphate hydrolase protein
1589282	-2.69107	3.06e-29	product_name=Uncharacterised conserved protein (DUF2361)-domain containing protein
1560762	-2.68921	1.95e-48	product_name=hypothetical protein
1447522	-2.68577	1.96e-12	product_name=Domain of unknown function (DUF4598)-domain containing protein
1452310	-2.6855	9.99e-05	product_name=hypothetical protein
1476547	-2.68377	1.93e-48	product_name=glycosyltransferase family 49 protein
1459378	-2.68148	9.98e-80	product_name=hypothetical protein
1534217	-2.67968	1.4e-37	product_name=hypothetical protein
1494799	-2.67806	1.25e-14	product_name=ClpP/crotonase-like domain-containing protein
1369688	-2.67667	2.44e-65	product_name=GDP-mannose 4%2C6 dehydratase
1519360	-2.67507	3.12e-99	product_name=hypothetical protein
1555165	-2.67311	7.26e-27	product_name=hypothetical protein
1376269	-2.67251	1.53e-28	product_name=hypothetical protein
1484970	-2.67159	1.66e-68	product_name=MCM2/3/5 family-domain containing protein
1508011	-2.66909	9.77e-42	product_name=hypothetical protein|Zn(2)-C6 fungal-specific transcription factor
1523754	-2.66481	2.23e-25	product_name=WD40-repeat-containing domain protein
1473442	-2.66229	3.09e-97	product_name=hypothetical protein
1540586	-2.66182	9.94e-41	product_name=Protein phosphatase 2C (PP2C)-like domain-containing protein
1032352	-2.66028	3.23e-50	product_name=hypothetical protein
1474215	-2.65865	0.000608704	product_name=CYP5208|CYP5208 OAD07678.1 CYP5208 protein
1549515	-2.65835	5.4e-49	product_name=Six-hairpin glycosidase-like protein
1377712	-2.65582	2.29e-56	product_name=hypothetical protein
1453663	-2.65333	1.85e-40	product_name=hypothetical protein
1552372	-2.65307	2.52e-73	product_name=Armadillo-type fold
1483648	-2.64692	1.87e-13	product_name=kinase-like domain-containing protein
1544699	-2.6464	9.13e-13	product_name=kinase-like domain-containing protein
1544162	-2.64581	8.41e-39	product_name=Zinc/iron permease
1461633	-2.64337	1.16e-49	product_name=nucleolar protein 14
1514164	-2.64025	7.18e-32	product_name=glycoside hydrolase family 18 protein
1500164	-2.63689	1.76e-43	product_name=PAS domain-containing protein|White Collar 1 Family. Putative blue-light photoreceptor
1511540	-2.63609	8.14e-44	product_name=acyltransferase-domain-containing protein
1486008	-2.63521	1.47e-75	product_name=RHD3/Sey1
1534363	-2.63201	1.1e-42	product_name=ATP-dependent RNA helicase dbp-4
1381016	-2.63165	8.99e-29	product_name=p21-C-terminal region-binding protein-domain containing protein
1540362	-2.63057	4.28e-05	product_name=hypothetical protein
1544317	-2.6304	2.13e-09	product_name=2-dehydropantoate 2-reductase
1513893	-2.62048	1.52e-40	product_name=small nucleolar RNP protein
1352145	-2.62043	4.43e-45	product_name=dihydrouridine synthase-domain-containing protein
1480783	-2.61442	2.52e-23	product_name=tRNA synthetases class I (C) catalytic domain-domain containing protein
1520899	-2.61437	1.91e-18	product_name=GATA-type Zinc finger transcription factor|GATA-type zinc finger transcription factor OAD03497.1 GATA-type zinc finger transcription factor
1484609	-2.61052	1.48e-10	product_name=DUF803 domain membrane protein
1358145	-2.61004	1.59e-39	product_name=hypothetical protein
1519581	-2.60945	2.93e-44	product_name=camp-dependent protein kinase
1503785	-2.60856	0.0599427	product_name=Putative integral membrane protein conserved region (DUF2404)-domain containing protein
1475445	-2.60761	0.000846507	product_name=hypothetical protein
1451908	-2.60162	4.96e-81	product_name=hypothetical protein
1503560	-2.60085	5.96e-35	product_name=hypothetical protein
1507170	-2.60029	7.7e-50	product_name=hypothetical protein
1325974	-2.59761	1.15e-06	product_name=Transcription factor S-II %28TFIIS%29%2C central domain-domain containing protein
1547028	-2.59633	1.86e-48	product_name=P-loop containing nucleoside triphosphate hydrolase protein
1395834	-2.59547	2.57e-10	product_name=hypothetical protein
1442409	-2.59527	6.48e-48	product_name=hypothetical protein
1029637	-2.59451	5.13e-55	product_name=hypothetical protein
1448945	-2.59397	1.59e-58	product_name=hypothetical protein
1520159	-2.59255	7.33e-55	product_name=STE/STE11/CDC15 protein kinase
1487853	-2.59048	2.64e-47	product_name=Tubulin/FtsZ%2C GTPase domain-containing protein
1526436	-2.58964	1.6e-35	product_name=hypothetical protein
1597965	-2.58952	6.93e-44	product_name=hypothetical protein
1485923	-2.58826	0.0398631	product_name=hypothetical protein
1467380	-2.5881	1.3e-67	product_name=hypothetical protein
1488995	-2.58808	5.65e-42	product_name=HotDog domain-containing protein
1551716	-2.58717	9.33e-67	product_name=hypothetical protein
1477078	-2.58652	2.74e-54	product_name=hypothetical protein
1453248	-2.58447	3.42e-76	product_name=hypothetical protein
1537591	-2.58435	4.25e-51	product_name=ATP-utilising Phosphoenolpyruvate carboxykinase
1596865	-2.58343	1.53e-31	product_name=hypothetical protein
1461395	-2.58273	3.27e-21	product_name=asparagine synthetase domain-containing protein 1
1467007	-2.57948	2.8e-05	product_name=Helix-loop-helix DNA-binding domain-containing transcription factor|helix-loop-helix DNA-binding domain-containing transcription factor OAD01133.1 helix-loop-helix DNA-binding domain-containing transcription factor
1362520	-2.5771	1.77e-32	product_name=kinase-like domain-containing protein
1538061	-2.57705	0.000145289	product_name=HotDog domain-containing protein
1505412	-2.57533	0.00117347	product_name=expressed protein
1549305	-2.57072	1.57e-77	product_name=CCCH-type Zinc finger transcription factor|CCCH-type zinc finger transcription factor OAD06802.1 CCCH-type zinc finger transcription factor
1507905	-2.56991	0.0179101	product_name=hypothetical protein
1514283	-2.5685	3.08e-08	product_name=hypothetical protein
1560228	-2.56841	0.000764581	product_name=hypothetical protein
1363237	-2.5675	3.07e-33	product_name=hypothetical protein
1476510	-2.56318	2.01e-22	product_name=rab-GTPase-TBC domain-containing protein
1473180	-2.56194	0.00546286	product_name=Peptidase S28
1455193	-2.56066	1.07e-13	product_name=Acyl-CoA dehydrogenase/oxidase C-terminal
1348871	-2.56012	0.0282895	product_name=hypothetical protein
1520079	-2.55927	0.0087263	product_name=hypothetical protein
1453614	-2.55892	1.06e-52	product_name=P-loop containing nucleoside triphosphate hydrolase protein
1362288	-2.55796	9.7e-46	product_name=Rho GTPase activation protein
1348965	-2.55641	1.91e-23	product_name=PQ loop repeat-domain containing protein
1548377	-2.55472	1.56e-60	product_name=hypothetical protein
1456510	-2.55343	0.000320895	product_name=Protein of unknown function (DUF962)-domain containing protein
1529836	-2.55173	4.06e-108	product_name=hypothetical protein
1496896	-2.55138	0.00784168	product_name=expressed protein
1529614	-2.55046	1.62e-34	product_name=hypothetical protein
1522260	-2.55013	7.7e-41	product_name=hypothetical protein
1533305	-2.54575	1.05e-08	product_name=kinase-like domain-containing protein
1510844	-2.54563	3.67e-36	product_name=Mitochondrial carrier domain-containing protein
1596547	-2.54413	1.62e-40	product_name=rRNA processing protein nop9
1349062	-2.5395	3.31e-25	product_name=Putative methyltransferase (DUF3321)-domain containing protein
1515220	-2.53592	0.000401789	product_name=ATP-NAD kinase-like domain-containing protein
1552255	-2.53308	3.94e-21	product_name=hypothetical protein
1507609	-2.53306	2.62e-39	product_name=PdxT/SNO family
1549264	-2.53171	4.08e-51	product_name=S-adenosyl-L-methionine-dependent methyltransferase
1416378	-2.53018	3.38e-34	product_name=hypothetical protein
1446850	-2.52848	9.69e-79	product_name=hypothetical protein
1595512	-2.52653	5.49e-55	product_name=expressed protein
1508685	-2.52169	1.4e-68	product_name=hypothetical protein
1525053	-2.52083	2.75e-05	product_name=hypothetical protein
1359682	-2.51975	1.28e-09	product_name=cytochrome P450
1410938	-2.51838	6.3e-06	product_name=hypothetical protein
1468356	-2.51613	5.51e-47	product_name=hypothetical protein
1495925	-2.51556	0.0507954	product_name=hypothetical protein
1470515	-2.51364	1.63e-10	product_name=Major facilitator superfamily domain-containing protein
1575623	-2.51314	0.0340608	product_name=hypothetical protein
1586212	-2.51175	2.31e-07	product_name=hypothetical protein
1510043	-2.50962	1.52e-38	product_name=hypothetical protein
1518196	-2.5086	2.08e-71	product_name=hypothetical protein
1472698	-2.50496	3.07e-36	product_name=P-loop containing nucleoside triphosphate hydrolase protein
1501966	-2.50064	2.29e-05	product_name=hypothetical protein
1483241	-2.50019	3.47e-57	product_name=homeobox domain-containing protein
1524249	-2.50002	6.74e-06	product_name=hypothetical protein
1482436	-2.49854	0.00904248	product_name=WD40-repeat-containing domain protein
1532423	-2.49838	1.42e-21	product_name=WD40-repeat-containing domain protein
1453071	-2.49713	5.59e-56	product_name=Endonuclease/exonuclease/phosphatase
1494781	-2.49679	1.69e-20	product_name=Alcohol acetyltransferase-domain containing protein
1507941	-2.49657	7.77e-17	product_name=expressed protein
1387974	-2.49621	5.57e-08	product_name=helix-loop-helix DNA-binding domain-containing protein
1543334	-2.49601	4.04e-61	product_name=hypothetical protein
1334985	-2.4935	5.38e-08	product_name=hypothetical protein
1576673	-2.492	0.0201918	product_name=hypothetical protein
1595034	-2.49155	5.41e-07	product_name=hypothetical protein
1501922	-2.49119	3.16e-29	product_name=hypothetical protein
1451021	-2.48979	3.58e-22	product_name=Nucleolar protein 12 (25kDa)-domain containing protein
1466945	-2.48946	4.99e-49	product_name=eukaryotic translation initiation factor 5B
1394233	-2.48406	2.51e-101	product_name=hypothetical protein
1493422	-2.48315	0.0115204	product_name=hypothetical protein
1528319	-2.48164	3.88e-07	product_name=fungal-specific transcription factor domain-containing protein
1041319	-2.47992	7.79e-23	product_name=hypothetical protein
1477157	-2.47941	2.06e-40	product_name=Histone-fold-containing protein
1531818	-2.47778	0.00116115	product_name=hypothetical protein
1457334	-2.47735	8.09e-28	product_name=putative methyltransferase-domain-containing protein
1502740	-2.4765	5.26e-60	product_name=Protein of unknown function (DUF2009)-domain containing protein
1505529	-2.47437	3.49e-31	product_name=hypothetical protein
1503619	-2.47402	9.81e-47	product_name=P-loop containing nucleoside triphosphate hydrolase protein
1513712	-2.47313	1.82e-11	product_name=kinase-like domain-containing protein
1368227	-2.46963	4.71e-28	product_name=Golgi-body localisation protein domain-domain containing protein
1550490	-2.46712	5.49e-47	product_name=trypsin-like cysteine/serine peptidase domain-containing protein
1492448	-2.46603	0.000141157	product_name=Tetratricopeptide repeat protein 36
1532187	-2.46388	3.4e-38	product_name=Anticodon-binding protein
1514839	-2.46324	1.42e-27	product_name=hypothetical protein
1483918	-2.4617	0.000863603	product_name=hypothetical protein
1436628	-2.45817	7.93e-09	product_name=expressed protein
1458792	-2.45622	3.08e-41	product_name=ADP-ribosylation factor family-domain containing protein
1396706	-2.45594	6.79e-39	product_name=DNA-directed RNA polymerase
1504306	-2.45315	5.26e-22	product_name=hypothetical protein
1504602	-2.45183	7.53e-34	product_name=hypothetical protein
1366113	-2.44852	6.1e-07	product_name=Fork head domain-domain containing protein
1593240	-2.44821	9.02e-12	product_name=RNase P subunit p30-domain-containing protein
1461490	-2.44496	3.59e-78	product_name=Phosphate-induced protein 1
1457599	-2.44157	8.26e-36	product_name=developmentally-regulated GTP-binding protein 1
1456382	-2.44022	4.07e-39	product_name=Conserved protein (DUF2356)-domain containing protein
1555327	-2.43533	4.11e-48	product_name=Rho GTPase activation protein
1592110	-2.43409	2.52e-23	product_name=hypothetical protein
1491676	-2.43312	0.0104964	product_name=hypothetical protein
1488461	-2.43249	2.2e-08	product_name=hypothetical protein
1375147	-2.43222	0.00213495	product_name=hypothetical protein
1352963	-2.43162	1.36e-50	product_name=rRNA-processing arch domain-containing protein
1356380	-2.42973	5.23e-08	product_name=hypothetical protein
1456379	-2.42887	1.59e-16	product_name=hypothetical protein
1381090	-2.42818	1.18e-41	product_name=N2%2CN2-dimethylguanosine tRNA methyltransferase
1530921	-2.42698	1.4e-12	product_name=thioredoxin-like protein
1490392	-2.42627	4.85e-42	product_name=hypothetical protein
1468849	-2.42489	8.47e-62	product_name=citrate synthase
1386241	-2.42311	9.16e-13	product_name=Thiolase-like protein
1319860	-2.41926	2.22e-20	product_name=non-structural maintenance of chromosomes element 1
1502298	-2.41816	2.1e-33	product_name=hypothetical protein
1485282	-2.41719	3.12e-21	product_name=hypothetical protein
1592979	-2.41654	1.24e-07	product_name=ClpP/crotonase-like domain-containing protein
1356753	-2.41432	3.05e-31	product_name=ATP-dependent RNA helicase Prh1
1468968	-2.41244	9e-14	product_name=S-adenosyl-L-methionine-dependent methyltransferase
1523307	-2.41106	1.84e-10	product_name=Zn(2)-C6 fungal-specific transcription factor|Zn(2)-C6 fungal-specific transcription factor OAD03744.1 Zn(2)-C6 fungal-specific transcription factor
1532635	-2.41049	5.82e-40	product_name=transforming protein RhoA
1464949	-2.41025	7.85e-12	product_name=hypothetical protein
1443806	-2.40538	2.06e-78	product_name=hypothetical protein
1366756	-2.40524	3.71e-62	product_name=ribonucleoside-diphosphate reductase large chain
1384157	-2.4034	1.32e-42	product_name=hypothetical protein
1497955	-2.40311	1.65e-15	product_name=expressed protein
1394110	-2.40171	9.58e-07	product_name=hypothetical protein
1601319	-2.4015	6.26e-22	product_name=DNA polymerase family A-domain-containing protein
1545819	-2.40019	2.14e-30	product_name=hypothetical protein
1562381	-2.39967	9.49e-53	product_name=translation initiation factor eIF3 subunit-domain-containing protein
1469935	-2.39895	7.39e-27	product_name=hypothetical protein
1555847	-2.3985	6.07e-40	product_name=hypothetical protein
1503770	-2.39709	4.43e-16	product_name=hypothetical protein
1518983	-2.39681	1.65e-38	product_name=Ribonuclease H-like domain-containing protein
1548996	-2.39403	2.72e-26	product_name=hypothetical protein
1537721	-2.39329	4.32e-53	product_name=component of IIS longevity pathway SMK-1-domain-containing protein
1459184	-2.39253	2.82e-43	product_name=Glycolipid transfer protein domain-containing protein
1508505	-2.39205	5.6e-14	product_name=hypothetical protein
1595243	-2.39087	2.57e-20	product_name=hypothetical protein
1523825	-2.38959	1.2e-18	product_name=Protein of unknown function (DUF1295)-domain containing protein
1351582	-2.38668	8.05e-32	product_name=hypothetical protein
1475150	-2.38665	1.83e-41	product_name=transmembrane amino acid transporter protein-domain-containing protein
1351740	-2.38554	3.06e-21	product_name=Arsenical pump membrane protein-domain containing protein
1528637	-2.38423	1.42e-26	product_name=Domain of unknown function (DUF1744)-domain containing protein
1593223	-2.38342	2.66e-51	product_name=Heat shock protein 70 family
1541263	-2.38116	0.0515307	product_name=chitin synthase
1367223	-2.38078	2.31e-36	product_name=Rab-GTPase-TBC domain-domain containing protein
1411741	-2.37858	1.91e-14	product_name=Phospholipase/Carboxylesterase-domain containing protein
1587789	-2.37677	3.82e-17	product_name=hypothetical protein
1506587	-2.37038	3.85e-44	product_name=DNA topoisomerase
1526584	-2.36951	0.00234417	product_name=hypothetical protein
1597088	-2.36407	7.12e-23	product_name=NADPH-dependent FMN reductase Lot6
1485863	-2.36306	6.12e-09	product_name=expressed protein
1488887	-2.35342	7.51e-06	product_name=SCP2 sterol-binding domain-containing protein
1349610	-2.35297	3.31e-40	product_name=hypothetical protein
1529177	-2.35102	2.4e-43	product_name=hypothetical protein
1528331	-2.35085	1.67e-27	product_name=hypothetical protein
1324592	-2.34816	6.9e-07	product_name=C2H2-type zinc finger transcription factor
1589968	-2.34752	9.42e-60	product_name=Coproporphyrinogen III oxidase
1542392	-2.34723	0.0272579	product_name=hypothetical protein
1505401	-2.34715	1.63e-12	product_name=hypothetical protein
1474289	-2.34525	4.97e-44	product_name=hypothetical protein
1504439	-2.33969	1.09e-09	product_name=hypothetical protein
1365111	-2.33766	3.25e-20	product_name=triacylglycerol lipase
1396194	-2.33665	0.000992186	product_name=hypothetical protein
1547275	-2.33604	0.0122413	product_name=acyltransferase ChoActase/COT/CPT
1512416	-2.33569	1.35e-32	product_name=hypothetical protein
1059115	-2.33522	0.0291433	product_name=hypothetical protein
1487793	-2.33439	2.16e-33	product_name=WD40-repeat-containing domain protein
1461402	-2.33348	6.99e-11	product_name=Predicted AdoMet-dependent methyltransferase-domain containing protein
1345849	-2.33344	5.76e-73	product_name=Putative methyltransferase-domain containing protein
1497352	-2.33092	2.24e-39	product_name=HOOK protein-domain containing protein
1457816	-2.32997	9.46e-17	product_name=Protein of unknown function (DUF3808)-domain containing protein
1479548	-2.32576	2.49e-36	product_name=WD40-repeat-containing domain protein
1454548	-2.32559	5.33e-39	product_name=L-methionine transporter
1534936	-2.32318	7.95e-29	product_name=ATP-dependent DNA ligase
1364563	-2.32305	2.11e-48	product_name=cation efflux family-domain-containing protein
1549604	-2.32134	0.00284566	product_name=Transketolase%2C thiamine diphosphate binding domain-domain containing protein
1518454	-2.31948	7.22e-44	product_name=Triose-phosphate Transporter family-domain containing protein
1484820	-2.31911	2.08e-31	product_name=hypothetical protein
1540333	-2.31621	2.56e-48	product_name=TRAPP II complex
1336367	-2.31572	7.22e-46	product_name=Signal peptide peptidase-domain containing protein
1455227	-2.31517	2.72e-37	product_name=kinase-like domain-containing protein
1519592	-2.3137	3.51e-38	product_name=hypothetical protein
1388116	-2.31299	1.11e-45	product_name=aminopeptidase
1437953	-2.31119	2.19e-07	product_name=hypothetical protein
1494030	-2.3108	6.83e-18	product_name=GATA-type Zinc finger transcription factor|GATA-type zinc finger transcription factor OAD04930.1 GATA-type zinc finger transcription factor
1551698	-2.31071	1.82e-41	product_name=hypothetical protein
1340641	-2.30971	6.55e-40	product_name=WD40-repeat-containing domain protein
1448143	-2.30566	5.52e-36	product_name=t-SNARE
1536870	-2.30564	3.35e-32	product_name=hypothetical protein
1590792	-2.30528	4.07e-43	product_name=Galactose-binding domain-like protein
1455764	-2.30528	0.000451833	product_name=hypothetical protein
1506854	-2.30327	3.91e-39	product_name=ras guanine nucleotide exchange factor domain-containing protein
1493192	-2.30261	3.84e-35	product_name=hypothetical protein
1383724	-2.30173	2.83e-24	product_name=kinase-like domain-containing protein
1320654	-2.29972	0.0055165	product_name=hypothetical protein
1460308	-2.29883	1.64e-05	product_name=hypothetical protein
1414621	-2.29382	6.25e-12	product_name=hypothetical protein
1550550	-2.29263	2.29e-36	product_name=STE/STE20/PAKA protein kinase
1596525	-2.29217	9.84e-36	product_name=DHS-like NAD/FAD-binding domain-containing protein
1582751	-2.29156	9.11e-72	product_name=Magnesium transporter NIPA-domain containing protein
1562935	-2.29114	3.94e-26	product_name=Protein kinase-like domain-containing protein
1456482	-2.29082	1.63e-15	product_name=hypothetical protein
1494637	-2.2905	4.04e-50	product_name=P-loop containing nucleoside triphosphate hydrolase protein
1515892	-2.28517	1.91e-16	product_name=hypothetical protein
1486398	-2.28294	5.36e-60	product_name=hypothetical protein
1394932	-2.28262	9.25e-73	product_name=tRNA synthetases class I (W and Y)-domain containing protein
1554288	-2.28058	1.94e-35	product_name=Low temperature viability protein-domain containing protein
1376320	-2.27909	6.83e-10	product_name=RNA-binding protein Mei2
1495103	-2.27808	1.63e-41	product_name=protein-tyrosine phosphatase-like protein
1452029	-2.278	0.0374886	product_name=hypothetical protein
1595795	-2.27554	2.62e-27	product_name=Transmembrane amino acid transporter protein-domain containing protein
1513734	-2.27377	2.19e-56	product_name=Protein of unknown function (DUF3808)-domain containing protein
1528841	-2.27372	0.0114642	product_name=Pyridoxal phosphate-dependent transferase
1479128	-2.27256	1.52e-29	product_name=hypothetical protein
1526513	-2.27238	2.37e-51	product_name=translation initiation factor 3 subunit E
1466266	-2.27199	3.49e-13	product_name=hypothetical protein
1390105	-2.2711	0.0123085	product_name=hypothetical protein
1483422	-2.26945	0.00204595	product_name=hypothetical protein
1552665	-2.2659	7.16e-29	product_name=hypothetical protein
1536873	-2.26429	4.24e-27	product_name=trm112p-domain-containing protein
1441683	-2.26228	7.75e-60	product_name=hypothetical protein
1535290	-2.26226	1.78e-09	product_name=hypothetical protein
1586480	-2.25917	0.0576755	product_name=hypothetical protein
1506812	-2.25858	5.4e-36	product_name=hypothetical protein
1528472	-2.25697	0.000208875	product_name=Triose-phosphate Transporter family-domain containing protein
1458460	-2.25585	2.34e-22	product_name=RNA polymerase
1557153	-2.25528	0.0566684	product_name=kinase-like domain-containing protein
1531335	-2.25401	3.53e-43	product_name=hypothetical protein
1534221	-2.25257	0.00893337	product_name=hypothetical protein
1483665	-2.25201	1.68e-28	product_name=CNH-domain-containing protein
1334980	-2.25118	3.05e-27	product_name=DIL domain-containing protein
1326529	-2.25063	1.76e-15	product_name=PLP-dependent transferase
1459280	-2.25038	1.7e-34	product_name=hypothetical protein
1582474	-2.24776	8.9e-35	product_name=hypothetical protein
1319340	-2.24385	1.93e-38	product_name=hypothetical protein
1359344	-2.24271	2.96e-39	product_name=DNA polymerase alpha/epsilon subunit B-domain-containing protein
1548721	-2.24194	1.34e-36	product_name=hypothetical protein
1546179	-2.24033	4.29e-09	product_name=expressed protein
1521186	-2.23808	7.3e-26	product_name=hypothetical protein
1595586	-2.23561	0.0395243	product_name=kinase-like domain-containing protein
1339505	-2.23454	4.92e-32	product_name=nucleus protein
1513864	-2.23443	0.000119752	product_name=hypothetical protein
1465679	-2.23318	4.48e-36	product_name=hypothetical protein
1557900	-2.23314	8.11e-41	product_name=Ferric reductase NAD binding domain-domain containing protein
1550913	-2.23241	1.07e-49	product_name=Homeodomain-like DNA binding domain-containing transcription factor
1532770	-2.23152	1.29e-10	product_name=hypothetical protein
1503128	-2.22803	0.0414826	product_name=Domain of unknown function in PX-proteins (DUF3818)-domain containing protein
1470959	-2.22594	0.0101262	product_name=hypothetical protein
1511399	-2.22351	1.55e-15	product_name=Ribokinase-like protein
1385235	-2.22315	7.11e-41	product_name=hypothetical protein
1481165	-2.22072	3.87e-20	product_name=YbaK/aminoacyl-tRNA synthetase-associated domain-containing protein
1373222	-2.2196	2.36e-56	product_name=glycosyltransferase family 49 protein
1442351	-2.21797	2.23e-23	product_name=programmed cell death protein 2
1450008	-2.21677	0.00996227	product_name=hypothetical protein
1533687	-2.21625	9.65e-47	product_name=SNF2 family N-terminal domain-containing protein
1597074	-2.21562	0.00444082	product_name=hypothetical protein
1454879	-2.21465	1.59e-61	product_name=Tubulin/FtsZ%2C GTPase domain-containing protein
1537705	-2.21193	1.8e-31	product_name=hypothetical protein
1482916	-2.20933	1.65e-16	product_name=kinase-like domain-containing protein
1591578	-2.20729	8.42e-38	product_name=Pseudouridine synthase
1527299	-2.2066	1.75e-41	product_name=hypothetical protein
1385627	-2.2059	2.11e-28	product_name=Fcf2 pre-rRNA processing-domain containing protein
1522867	-2.20557	2.18e-54	product_name=CobB/CobQ-like glutamine amidotransferase domain-domain containing protein
1476992	-2.20285	1.43e-51	product_name=Aminotransferase
1446249	-2.2021	1.04e-41	product_name=CPSF A subunit region-domain-containing protein
1515923	-2.20081	4.64e-36	product_name=hypothetical protein
1483557	-2.20081	5.29e-71	product_name=NADH-ubiquinone reductase complex 1 MLRQ subunit-domain-containing protein
1469227	-2.20036	1.27e-31	product_name=hypothetical protein
1600960	-2.20004	0.0490901	product_name=Alpha/Beta hydrolase fold
1462138	-2.19911	4.5e-40	product_name=hypothetical protein
1554855	-2.19598	1.64e-46	product_name=P-loop containing nucleoside triphosphate hydrolase protein
1365180	-2.19582	4.17e-18	product_name=hypothetical protein
1552635	-2.19374	1.57e-15	product_name=cytidine deaminase-like protein
1460890	-2.19272	1.29e-38	product_name=regulator of chromosome condensation 1/beta-lactamase-inhibitor protein II
1378752	-2.19084	1.6e-21	product_name=hypothetical protein
1530425	-2.19045	4.29e-36	product_name=hypothetical protein
1469826	-2.18997	0.0395886	product_name=hypothetical protein
1374861	-2.18909	2.78e-05	product_name=PQ loop repeat-domain-containing protein
1524788	-2.18866	2.46e-52	product_name=Transient receptor potential (TRP) ion channel-domain containing protein
1030640	-2.18712	0.000562952	product_name=Protein of unknown function (DUF3074)-domain containing protein
1439461	-2.18707	5.07e-15	product_name=hypothetical protein
1454771	-2.18702	8.76e-26	product_name=hypothetical protein
1484053	-2.18674	3.38e-32	product_name=hypothetical protein
1371914	-2.18648	9.13e-46	product_name=p53-like transcription factor|p53-like transcription factor OAD00723.1 p53-like transcription factor
1466518	-2.18641	1.68e-32	product_name=Nucleotide-diphospho-sugar transferase
1595950	-2.18127	6.13e-36	product_name=hypothetical protein
1474672	-2.18116	1.01e-10	product_name=Bifunctional lycopene cyclase/phytoene synthase
1577550	-2.17797	0.000195336	product_name=C2H2-type zinc finger transcription factor
1594929	-2.17698	3.08e-37	product_name=hypothetical protein
1546834	-2.17494	1.18e-28	product_name=Protein of unknown function (DUF3115)-domain containing protein
1531515	-2.1737	2.01e-54	product_name=Nonaspanin (TM9SF)
1140161	-2.17305	0.01456	product_name=hypothetical protein
1375585	-2.17102	3.19e-33	product_name=Uncharacterized conserved protein (DUF2183)-domain containing protein
1472235	-2.1696	4.99e-54	product_name=glycosyltransferase family 77 protein
1459153	-2.16778	2.65e-24	product_name=alternative NADP(H) dehydrogenase
1462606	-2.16682	4.44e-31	product_name=hypothetical protein
1487284	-2.16596	3.63e-70	product_name=Indoleamine 2%2C3-dioxygenase
1291525	-2.16477	2.42e-05	product_name=hypothetical protein
1461009	-2.1641	3.1e-31	product_name=small G-protein Ras2
1325533	-2.16397	5.04e-57	product_name=permease family-domain-containing protein
1463601	-2.15993	1.31e-36	product_name=Uroporphyrinogen decarboxylase
1510270	-2.15933	2.75e-26	product_name=S-adenosyl-L-methionine-dependent methyltransferase
1479258	-2.15859	1.51e-32	product_name=C2H2-type zinc finger transcription factor
1489493	-2.15735	3.59e-27	product_name=Mitochondrial carrier domain-containing protein
1520136	-2.15396	3.58e-56	product_name=cytochrome P450
1509587	-2.15385	6.69e-49	product_name=Nup133 N terminal like-domain-containing protein
1548320	-2.15299	3.69e-66	product_name=Domain of unknown function in PX-proteins (DUF3818)-domain containing protein
1527512	-2.15026	5.1e-53	product_name=Acyl-CoA dehydrogenase/oxidase%2C N-terminal and middle domain-containing protein
1553987	-2.15009	0.0128551	product_name=hypothetical protein
1494565	-2.1487	2.05e-41	product_name=hypothetical protein
1472422	-2.145	5.68e-55	product_name=Protein kinase-like domain-containing protein
1390474	-2.14347	1.87e-10	product_name=cytochrome P450
1392525	-2.14274	0.00596513	product_name=C2H2-type zinc finger transcription factor
1365018	-2.14253	8.76e-06	product_name=kinase-like domain-containing protein
1442589	-2.14222	3.29e-51	product_name=S-adenosyl-L-methionine-dependent methyltransferase
1444314	-2.14087	0.0254315	product_name=Chorismate mutase
1534741	-2.13896	1.42e-44	product_name=hypothetical protein
1507697	-2.1389	6.61e-33	product_name=Ribonuclease H-like domain-containing protein
1596437	-2.13871	5.35e-35	product_name=hypothetical protein
1390831	-2.13855	1.85e-55	product_name=CRM1 C terminal-domain containing protein
1496847	-2.13846	4.94e-45	product_name=Metallo-peptidase family M12-domain-containing protein
1518794	-2.13834	1.93e-44	product_name=beta-lactamase-like protein
1521094	-2.13759	3.56e-38	product_name=Heat shock factor (HSF)-type transcription factor|heat shock factor-type transcription factor
1596648	-2.1302	1.26e-19	product_name=methyltransferase-domain-containing protein
1389618	-2.12974	0.016967	product_name=hypothetical protein
1501533	-2.1293	1.03e-33	product_name=hypothetical protein
1533263	-2.12912	2.8e-12	product_name=hypothetical protein
1389541	-2.12886	3.06e-37	product_name=hypothetical protein
1506181	-2.1273	2.16e-33	product_name=MCM2/3/5 family-domain containing protein
1481514	-2.12592	5.73e-35	product_name=hypothetical protein
1487342	-2.12462	8.84e-05	product_name=hypothetical protein
1497574	-2.12447	2.87e-28	product_name=hypothetical protein
1468879	-2.12391	3.46e-09	product_name=hypothetical protein
1482659	-2.11931	1.09e-20	product_name=kinase-like domain-containing protein
1550499	-2.11923	7.94e-28	product_name=Chloroperoxidase
1445692	-2.11891	3.38e-23	product_name=Ribosome biogenesis protein SLX9-domain containing protein
1452460	-2.11539	8.77e-29	product_name=Dynein heavy chain and region D6 of dynein motor-domain containing protein
1357394	-2.11458	2.05e-38	product_name=hypothetical protein
1593413	-2.11335	0.00123244	product_name=skeletal muscle and kidney-enriched inositol phosphatase protein
1385035	-2.10797	1.42e-15	product_name=hypothetical protein
1459691	-2.10757	9.65e-59	product_name=FAD dependent oxidoreductase-domain-containing protein
1457807	-2.10563	8.28e-23	product_name=Metallo-dependent phosphatase-like protein
1590298	-2.10551	8.18e-13	product_name=hypothetical protein
1355982	-2.10538	5.93e-21	product_name=Orotidine-5'-monophosphate decarboxylase
1544807	-2.10213	1.24e-55	product_name=ADP-ribosylation factor family-domain containing protein
1515079	-2.10175	0.00449708	product_name=COPI associated protein-domain containing protein
1549646	-2.10003	4.03e-09	product_name=hypothetical protein
1346483	-2.09985	3.01e-21	product_name=Rhodanese-like domain-containing protein
1509309	-2.09964	4.76e-32	product_name=FAD binding domain-containing protein
1363816	-2.09915	2.12e-40	product_name=hypothetical protein
1457561	-2.09529	9.45e-27	product_name=Pyridoxal phosphate-dependent transferase
1534840	-2.0949	4.47e-51	product_name=Armadillo-type fold
1490728	-2.09452	0.00480443	product_name=expressed protein
1556829	-2.09261	2.44e-26	product_name=hypothetical protein
1391899	-2.09099	0.0207519	product_name=hypothetical protein
1465397	-2.09042	2.3e-54	product_name=Cytidine deaminase-like protein
1516145	-2.09004	0.0385707	product_name=Multicopper oxidase-domain containing protein
1499260	-2.08828	4.57e-12	product_name=CCCH-type Zinc finger transcription factor|hypothetical protein
1504178	-2.08691	8.43e-25	product_name=tRNA synthetases class II (A)-domain containing protein
1586906	-2.08458	3.06e-19	product_name=Eukaryotic protein of unknown function (DUF953)-domain containing protein
1443725	-2.08287	1.81e-26	product_name=hypothetical protein
1545806	-2.08256	3.46e-32	product_name=hypothetical protein
1528296	-2.08188	0.0106468	product_name=CMGC/MAPK/ERK protein kinase
1068210	-2.07926	0.000495417	product_name=C2H2-type zinc finger transcription factor
1519199	-2.07919	1.53e-94	product_name=lysyl-tRNA synthetase
1543667	-2.07895	2.53e-20	product_name=Tubulin/FtsZ%2C GTPase domain-containing protein
1583069	-2.07662	1.19e-32	product_name=tRNA (guanine-N-7) methyltransferase
1556846	-2.07607	6.52e-28	product_name=glyoxal oxidase N-terminus-domain-containing protein
1503008	-2.07594	1.89e-38	product_name=adenosylmethionine decarboxylase
1466530	-2.07534	0.0236514	product_name=hypothetical protein
1370356	-2.0743	0.00248363	product_name=OPT oligopeptide transporter protein-domain-containing protein
1472337	-2.07203	5.25e-23	product_name=Aldehyde dehydrogenase domain-containing protein
1492669	-2.07071	6.56e-12	product_name=abhydrolase associated lipase
1446621	-2.07038	6.67e-06	product_name=chitin synthase
1531752	-2.07026	1.51e-39	product_name=ATP synthase regulation protein NCA2-domain containing protein
1554959	-2.06892	2.13e-22	product_name=cytochrome P450
1447312	-2.06817	2.99e-31	product_name=IKI3 family-domain-containing protein
1528191	-2.06785	1.63e-50	product_name=phosphoribosyltransferase-like protein
1490477	-2.0666	2.21e-24	product_name=hypothetical protein
1518552	-2.06649	8.86e-14	product_name=hypothetical protein
1471900	-2.06391	4.28e-28	product_name=hypothetical protein
1477496	-2.06389	4.37e-42	product_name=kynureninase
1518294	-2.06254	5.24e-14	product_name=S-adenosyl-L-methionine-dependent methyltransferase
1542057	-2.06201	2.82e-56	product_name=hypothetical protein
1540144	-2.06171	0.000251143	product_name=hypothetical protein
1510534	-2.06042	4.47e-05	product_name=general substrate transporter
1459809	-2.05895	1.65e-26	product_name=Rho GTPase activation protein
1521864	-2.05712	1.65e-29	product_name=hypothetical protein
1540940	-2.0571	4.18e-30	product_name=KRI1-like family C-terminal-domain-containing protein
1506452	-2.054	5.01e-37	product_name=acyltransferase ChoActase/COT/CPT
1482376	-2.05234	8.8e-37	product_name=hypothetical protein
1465157	-2.05045	1.13e-25	product_name=Armadillo-type fold
1353724	-2.0494	4.3e-12	product_name=Aspartate/glutamate/uridylate kinase
1366133	-2.04666	6.67e-25	product_name=Ubiquitin-conjugating enzyme/RWD-like protein
1409085	-2.04469	0.0504652	product_name=expressed protein
1538766	-2.0446	4.29e-17	product_name=S-adenosyl-L-methionine-dependent methyltransferase
1503601	-2.04338	4.15e-23	product_name=hypothetical protein
1570795	-2.04294	0.0216261	product_name=cation-transporting ATPase
1537784	-2.04139	3.64e-08	product_name=hypothetical protein
1475563	-2.04026	2.86e-08	product_name=MT-A70-domain-containing protein
1356532	-2.03919	4.18e-29	product_name=Tetrapyrrole methylase
1584601	-2.03911	3.33e-06	product_name=hypothetical protein
1487262	-2.03902	0.0378336	product_name=apses-type HTH transcription regulator
1519577	-2.0381	1.88e-20	product_name=hypothetical protein
1495836	-2.03791	9.92e-23	product_name=adenine phosphoribosyltransferase
1477449	-2.03677	8.83e-48	product_name=hypothetical protein
1366857	-2.03526	3.63e-17	product_name=hypothetical protein
1029479	-2.03474	8.19e-06	product_name=hypothetical protein
1466322	-2.03453	2.46e-94	product_name=hypothetical protein
1351799	-2.03413	1.83e-30	product_name=Protein of unknown function DUF89-domain containing protein
1595186	-2.03387	0.00615776	product_name=Major facilitator superfamily domain-containing protein
1379248	-2.03204	4.47e-57	product_name=armadillo-type protein
1452803	-2.03146	1.28e-43	product_name=hypothetical protein
1467558	-2.03143	9.26e-11	product_name=Armadillo-type fold
1499495	-2.0306	1.43e-35	product_name=hypothetical protein
1498606	-2.03045	8.33e-23	product_name=Uncharacterized conserved protein (DUF2039)-domain containing protein
1394652	-2.02985	1.91e-31	product_name=hypothetical protein
1462629	-2.02911	0.0592301	product_name=Peptidase S8/S53 domain-containing protein
1554103	-2.02871	1.04e-42	product_name=glycosyl hydrolases family 15-domain-containing protein
1447902	-2.02563	1.27e-30	product_name=hypothetical protein
1472681	-2.02346	6.38e-32	product_name=hypothetical protein
1381758	-2.02018	1.23e-08	product_name=coatomer protein alpha subunit
1447116	-2.01573	1.99e-15	product_name=Rab-GTPase-TBC domain-domain containing protein
1462641	-2.01503	0.00486243	product_name=Histidine phosphatase superfamily
1567917	-2.01475	3.5e-47	product_name=MBOAT-domain-containing protein
1491069	-2.01333	2.07e-72	product_name=hypothetical protein
1546442	-2.01264	3.04e-36	product_name=hypothetical protein
1350385	-2.01257	3.79e-20	product_name=DNA-directed RNA polymerase III subunit Rpc5
1551092	-2.01196	4.75e-09	product_name=Helix-loop-helix DNA-binding domain-containing transcription factor|helix-loop-helix DNA-binding domain-containing transcription factor OAD07015.1 helix-loop-helix DNA-binding domain-containing transcription factor
1532507	-2.01141	6.97e-34	product_name=RASsguanine-nucleotide exchange protein
1564058	-2.01131	0.00158193	product_name=FAD-linked oxidoreductase-like protein
1530031	-2.01069	8.99e-53	product_name=hypothetical protein
1489466	-2.00573	4.61e-40	product_name=hypothetical protein
1498002	-2.00505	8.68e-44	product_name=Not1 transcription factor
1586864	-2.00406	5.46e-22	product_name=THUMP domain-containing protein 1
1526693	-2.00337	6.8e-07	product_name=Gamma-glutamyltranspeptidase
1596028	-2.00326	6.34e-46	product_name=hypothetical protein
1460003	-2.00324	1.05e-26	product_name=ATP synthase|ATP synthase F1 subcomplex alpha subunit ATP1
1594858	-2.00302	1.46e-15	product_name=Beta-lactamase-like protein
1333967	-2.00207	6.25e-33	product_name=hypothetical protein
1547018	-1.99992	0.00766381	product_name=hypothetical protein
1491770	-1.99886	5.87e-12	product_name=Cytidine deaminase-like protein
1487968	-1.99857	1.51e-44	product_name=SecY subunit domain-containing protein
1511098	-1.99743	6.49e-30	product_name=Acyltransferase ChoActase/COT/CPT
1491777	-1.99706	7.28e-19	product_name=hypothetical protein
1582517	-1.99348	4.98e-12	product_name=serum/glucocorticoid regulated kinase 2
1551388	-1.99064	1.04e-08	product_name=F/Y-rich N-terminus-domain containing protein
1493587	-1.9901	8.12e-29	product_name=Permease family-domain containing protein
1346268	-1.98477	8.29e-05	product_name=hypothetical protein
1478682	-1.98367	3.7e-15	product_name=P-loop containing nucleoside triphosphate hydrolase protein
1461192	-1.97978	2.36e-16	product_name=DHHC palmitoyltransferase-domain containing protein
1479854	-1.97923	6.79e-28	product_name=DEAD-domain-containing protein
1520228	-1.9791	1.37e-22	product_name=hypothetical protein
1528698	-1.97723	1.62e-19	product_name=hypothetical protein
1512668	-1.97687	0.0353257	product_name=hypothetical protein
1527242	-1.97625	9.93e-19	product_name=hypothetical protein
1513001	-1.97527	3.01e-44	product_name=protein phosphatase PP2A0 B subunit gamma isoform
1571957	-1.97524	5.97e-32	product_name=hypothetical protein
1502578	-1.97493	3.93e-05	product_name=expressed protein
1474409	-1.97417	1.77e-17	product_name=SRR1-domain-containing protein
1519794	-1.97366	4.27e-30	product_name=ATP synthase F1 subcomplex gamma subunit ATP3
1536697	-1.97325	3.15e-18	product_name=P-loop containing nucleoside triphosphate hydrolase protein
1553732	-1.97232	1.77e-21	product_name=CYP5209|CYP5209 OAC98265.1 CYP5209 protein
1549991	-1.97204	5.53e-05	product_name=hypothetical protein
1489737	-1.97153	0.000550013	product_name=phospholipid-transporting ATPase
1357096	-1.97071	0.00507247	product_name=hypothetical protein
1595137	-1.96999	9.21e-33	product_name=Major facilitator superfamily domain-containing protein
1452110	-1.96905	4.65e-21	product_name=ribonuclease H-like domain-containing protein
1489851	-1.96816	5.57e-10	product_name=WD40-repeat-containing domain protein
1505860	-1.96788	2.12e-20	product_name=Uracil phosphoribosyltransferase-domain containing protein
1311981	-1.96763	0.00100594	product_name=hypothetical protein
1458211	-1.96693	7.75e-12	product_name=hypothetical protein
1508248	-1.96361	6.27e-10	product_name=mate-domain-containing protein
1515712	-1.96084	4.14e-44	product_name=glycosyltransferase|Glycosyltransferase Family 31 / Glycosyltransferase Family 32 protein
1597821	-1.96073	1.11e-08	product_name=hypothetical protein
1370040	-1.95967	0.0392662	product_name=Ankyrin repeat-containing domain protein
1438416	-1.95592	7.94e-16	product_name=hypothetical protein
1508731	-1.95526	2.58e-22	product_name=hypothetical protein
1504756	-1.95368	0.0495203	product_name=hypothetical protein
1515854	-1.9533	1.12e-25	product_name=hypothetical protein
1493910	-1.95304	7.57e-28	product_name=cytidylyltransferase family-domain-containing protein
1354895	-1.95202	5.49e-29	product_name=CCCH-type zinc finger transcription factor
1590398	-1.94805	5.28e-14	product_name=organic solute transporter Ostalpha-domain-containing protein
1344170	-1.94779	3.93e-12	product_name=hypothetical protein
1382285	-1.94776	7.74e-19	product_name=S-adenosyl-L-methionine-dependent methyltransferase
1494895	-1.94669	0.000372354	product_name=SCP2 sterol-binding domain-containing protein
1474860	-1.94635	1.65e-35	product_name=Calreticulin CNE1|Calreticulin CNE1 OAD07748.1 Calreticulin CNE1
1552926	-1.94445	1.64e-19	product_name=protein pyrABCN
1491636	-1.94421	1.03e-13	product_name=tryptophan synthase beta subunit-like PLP-dependent enzyme
1494412	-1.94368	2.22e-18	product_name=expressed protein
1528476	-1.94194	1.88e-05	product_name=hypothetical protein
1465479	-1.94194	3.46e-25	product_name=Histone acetyltransferases subunit 3-domain containing protein
1595757	-1.94184	7.3e-30	product_name=hypothetical protein
1373392	-1.94141	4.33e-27	product_name=Fungalysin metallopeptidase-domain-containing protein
1531626	-1.94094	7.18e-32	product_name=RNA polymerase I-associated factor PAF67-domain-containing protein
1392327	-1.94082	0.0282873	product_name=hypothetical protein
1461125	-1.94021	1.67e-08	product_name=Fungal specific transcription factor domain-domain containing protein
1448763	-1.93916	8.65e-24	product_name=hypothetical protein
1502016	-1.93823	0.00310619	product_name=hypothetical protein
1480706	-1.93746	9.44e-19	product_name=hypothetical protein
1522434	-1.9372	0.00842997	product_name=hypothetical protein
1534834	-1.93697	1.47e-33	product_name=VTC domain-containing protein
1390517	-1.93451	5.43e-08	product_name=hypothetical protein
1490508	-1.93374	2.44e-41	product_name=high affinity camp protein
1497042	-1.93159	3.01e-13	product_name=cyclophilin
1471988	-1.93018	8.35e-30	product_name=hypothetical protein
1507419	-1.93003	3.22e-36	product_name=hypothetical protein
1467539	-1.92998	1.84e-16	product_name=ClpP/crotonase-like domain-containing protein
1468972	-1.92969	4.6e-17	product_name=acyl-CoA dehydrogenase/oxidase
1557467	-1.92873	0.0207363	product_name=hypothetical protein
1489534	-1.9281	1.44e-08	product_name=Phosphatidylethanolamine-binding protein PEBP
1599758	-1.92682	2.31e-28	product_name=nucleoporin complex subunit 54-domain-containing protein
1511194	-1.92612	4.29e-12	product_name=hypothetical protein
1488520	-1.92595	6.43e-56	product_name=hypothetical protein
1588108	-1.92559	6.78e-15	product_name=CCCH-type zinc finger transcription factor
1503961	-1.92507	2.26e-23	product_name=Translation Initiation factor eIF- 4e-like domain-containing protein
1456947	-1.9248	1.85e-35	product_name=WD40-repeat-containing domain protein
1476540	-1.92421	2.01e-34	product_name=hypothetical protein
1524729	-1.9212	4.99e-27	product_name=hypothetical protein
1552877	-1.92103	1.14e-05	product_name=kinesin heavy chain
1475239	-1.9201	2.49e-28	product_name=N-acetyltransferase B complex (NatB) non catalytic subunit-domain containing protein
1481053	-1.91806	2.11e-33	product_name=hypothetical protein
1537445	-1.91761	3.53e-12	product_name=Peptidase M50B-like-domain containing protein
1525458	-1.91698	2.89e-24	product_name=hypothetical protein
1393442	-1.91591	1.71e-25	product_name=guanine nucleotide-binding protein alpha-3 subunit protein
1522539	-1.91484	4.13e-21	product_name=Domain of unknown function (DUF383)-domain containing protein
1570595	-1.91324	0.000520659	product_name=Sulfate transporter family-domain containing protein
1391247	-1.91109	5.99e-39	product_name=P-loop containing nucleoside triphosphate hydrolase protein
1475228	-1.91051	2.36e-24	product_name=hypothetical protein
1351971	-1.90662	0.0147799	product_name=P-loop containing nucleoside triphosphate hydrolase protein
1395733	-1.90617	7.33e-40	product_name=chromosome segregation protein sudA
1460530	-1.90568	1.14e-09	product_name=hypothetical protein
1451592	-1.90354	1.61e-18	product_name=expressed protein
1461343	-1.90339	4.6e-30	product_name=hypothetical protein|Putative ubiquitin ligase similar to CrgA
1489280	-1.89973	1.1e-36	product_name=hypothetical protein
1357504	-1.89945	1.76e-32	product_name=cyclin-domain-containing protein
1509213	-1.89622	0.00035855	product_name=hypothetical protein
1473161	-1.89606	1.41e-09	product_name=Zn(2)-C6 fungal-specific transcription factor
1510157	-1.89573	6.8e-14	product_name=Mss4-like protein
1511524	-1.89466	1.34e-25	product_name=gelsolin-like protein 2-like
1396163	-1.89461	1.22e-20	product_name=nucleoporin subcomplex protein binding to Pom34-domain-containing protein
1475255	-1.89391	1.49e-23	product_name=hypothetical protein
1526624	-1.89316	2.82e-30	product_name=serine/threonine protein kinase|serine/threonine protein kinase%2C CMGC family%2C glycogen synthase kinase
1362225	-1.8903	5.55e-21	product_name=hypothetical protein
1391099	-1.89009	6.02e-10	product_name=mitochondrial carrier domain-containing protein
1547090	-1.88965	9.83e-38	product_name=Carbohydrate-Binding Module Family 13 protein|carbohydrate-binding module family 13 protein OAC98809.1 carbohydrate-binding module family 13 protein
1498689	-1.88937	3.75e-53	product_name=Pyridoxal phosphate-dependent transferase
1494052	-1.88833	2.05e-33	product_name=DnaJ homolog subfamily C member 7-like
1591989	-1.88762	7.81e-05	product_name=glycoside hydrolase|Glycoside Hydrolase Family 5 protein
1506460	-1.88721	7.13e-25	product_name=Mitochondrial carrier domain-containing protein
1467693	-1.88589	0.00589236	product_name=Sodium/calcium exchanger protein-domain-containing protein
1465731	-1.88531	1.26e-25	product_name=guanine-1-methyltransferase-domain-containing protein
1557277	-1.88511	1.48e-23	product_name=hypothetical protein
1461672	-1.88487	9.85e-14	product_name=Alpha/Beta hydrolase fold
1557398	-1.88444	2.29e-19	product_name=hypothetical protein
1456632	-1.88406	4.87e-22	product_name=hypothetical protein
1508237	-1.88305	4.33e-31	product_name=Nup133 N terminal like-domain-containing protein
1478086	-1.88097	1.07e-33	product_name=Glycerophosphoryl diester phosphodiesterase family-domain-containing protein
1513628	-1.88092	2.69e-11	product_name=rab9 effector protein with kelch motifs protein
1374601	-1.88085	1.06e-36	product_name=P-loop containing nucleoside triphosphate hydrolase protein
1509711	-1.87824	6.79e-23	product_name=potassium/sodium efflux P-type ATPase
1388337	-1.87722	5.77e-11	product_name=hypothetical protein
1345670	-1.87722	1.43e-28	product_name=COX15/CtaA family
1506373	-1.87496	1.51e-42	product_name=elongation factor 3
1487336	-1.87394	5.47e-21	product_name=Gar1/Naf1 RNA binding region-domain-containing protein
1532242	-1.87123	0.000502545	product_name=hypothetical protein
1541014	-1.87073	7.91e-18	product_name=chaperonin 10-like protein
1488761	-1.8695	1.11e-28	product_name=C2 domain-containing protein
1525960	-1.86907	1.38e-40	product_name=chitin synthase
1362638	-1.86864	2.1e-17	product_name=midasin-like
1516331	-1.86819	3.92e-32	product_name=hypothetical protein
1470767	-1.86789	2.5e-30	product_name=hypothetical protein
1490130	-1.86705	2.49e-33	product_name=hypothetical protein
1506604	-1.86699	7.21e-10	product_name=hypothetical protein
1389670	-1.86539	1.67e-24	product_name=Transcription initiation factor TFIID component TAF4 family-domain containing protein
1454005	-1.86455	8.86e-69	product_name=beta subunit of phenylalanyl-tRNA synthetase
1447828	-1.86366	1.33e-33	product_name=pre-mRNA splicing factor Syf-1
1520795	-1.86242	3.48e-27	product_name=Histone-fold-containing protein
1357266	-1.86224	2.82e-35	product_name=hypothetical protein
1328601	-1.861	2.18e-29	product_name=hypothetical protein
1493955	-1.85885	4.07e-17	product_name=SEN1 N terminal-domain-containing protein
1547878	-1.85838	1.11e-32	product_name=protein kinase|Protein Kinase A regulatory subunit
1543084	-1.85797	1.38e-34	product_name=hypothetical protein
1390582	-1.8578	3.71e-21	product_name=WD40-repeat-containing domain protein
1411847	-1.85697	2.5e-23	product_name=Gar1/Naf1 RNA binding region-domain containing protein
1349257	-1.85664	1.61e-37	product_name=hypothetical protein
1531951	-1.85658	4.07e-18	product_name=3-hydroxyacyl-CoA dehydrogenase
1472659	-1.85648	1.3e-30	product_name=WD40-repeat-containing domain protein
1449048	-1.85594	9.96e-16	product_name=hypothetical protein
1597699	-1.85226	1.43e-27	product_name=transcription factor CBF
1521047	-1.85191	6.93e-23	product_name=P-loop containing nucleoside triphosphate hydrolase protein
1347570	-1.85134	5.51e-15	product_name=origin recognition complex subunit 2-domain-containing protein
1557351	-1.8507	2.73e-24	product_name=spermidine synthase
1120711	-1.85037	0.00015284	product_name=hypothetical protein
1593168	-1.85025	6.57e-40	product_name=importin-11
1346179	-1.85007	1.2e-28	product_name=hypothetical protein
1509260	-1.84989	4.09e-23	product_name=N-acetylglucosaminyl transferase component-domain-containing protein
1386412	-1.84959	1.97e-19	product_name=Elongator complex protein 5
1456656	-1.84938	5.88e-06	product_name=acyl-CoA dehydrogenase/oxidase C-terminal
1457293	-1.84888	1.21e-22	product_name=protein SCAI-like
1484963	-1.84674	1.66e-40	product_name=hypothetical protein
1388043	-1.84562	3.94e-17	product_name=histidyl-tRNA synthetase%2C class IIa
1532256	-1.8453	1.37e-43	product_name=C2H2-type Zinc finger transcription factor|C2H2-type zinc finger transcription factor OAD00068.1 C2H2-type zinc finger transcription factor
1357753	-1.84506	7.99e-07	product_name=GPR1/FUN34/yaaH family-domain containing protein
1473523	-1.84421	1.7e-26	product_name=hypothetical protein
1520052	-1.84359	3.02e-34	product_name=Mur ligase
1359889	-1.84331	2.87e-20	product_name=armadillo-type protein
1524599	-1.84177	1.39e-23	product_name=DDT transcription factor
1382672	-1.84152	1.05e-16	product_name=Protein of unknown function (DUF2962)-domain containing protein
1550104	-1.8389	4.76e-32	product_name=hypothetical protein
1570432	-1.83881	0.0132874	product_name=helix-loop-helix DNA-binding domain-containing transcription factor
1457460	-1.83839	3.33e-23	product_name=hypothetical protein
1496324	-1.83697	2.93e-09	product_name=2-nitropropane dioxygenase
1489956	-1.83678	1.42e-41	product_name=Phosphoribosylglycinamide synthetase%2C ATP-grasp %28A%29 domain-domain containing protein
1535316	-1.83602	1.5e-26	product_name=nucleoporin nup44
1499023	-1.83583	1.21e-28	product_name=Ribosomal protein S3Ae
1137336	-1.83497	7.71e-31	product_name=glucose-repressible alcohol dehydrogenase transcriptional effector
1450394	-1.83483	1.59e-21	product_name=hypothetical protein
1590996	-1.83442	0.00374646	product_name=hypothetical protein
1556763	-1.8327	3.1e-06	product_name=Mpv17 / PMP22 family-domain containing protein
1511544	-1.83265	0.0168211	product_name=hypothetical protein
1535789	-1.83214	2.96e-20	product_name=hypothetical protein
1467688	-1.82991	5.99e-11	product_name=kinase-like protein
1516150	-1.82978	1.33e-43	product_name=kinase-like domain-containing protein
1488441	-1.82916	8.07e-07	product_name=peptidase M76
1555346	-1.82818	1.25e-19	product_name=hypothetical protein
1535783	-1.82811	1.32e-17	product_name=hypothetical protein
1548815	-1.82809	2.54e-23	product_name=CNH domain-domain containing protein
1367207	-1.82809	7.31e-06	product_name=Cytochrome b5-like heme/steroid binding domain-containing protein
1367679	-1.82808	4.08e-22	product_name=hypothetical protein
1463130	-1.82803	3.47e-40	product_name=Elongation factor Tu GTP binding domain-domain containing protein
1591077	-1.82613	3.19e-13	product_name=Dual specificity phosphatase%2C catalytic domain-domain containing protein
1529084	-1.82543	5.35e-08	product_name=hypothetical protein
1479178	-1.82009	1.78e-27	product_name=mono-functional DNA-alkylating methyl methanesulfonate N-term-domain-containing protein
1556825	-1.81779	6.74e-41	product_name=GDSL/SGNH-like Acyl-Esterase family found in Pmr5 and Cas1p-domain containing protein
1359587	-1.81756	0.0301055	product_name=hypothetical protein
1554112	-1.81755	2.4e-22	product_name=hypothetical protein
1528714	-1.81519	5.94e-25	product_name=hypothetical protein
1513557	-1.81482	8.54e-13	product_name=Fcf1-domain containing protein
1593519	-1.81221	3.84e-29	product_name=hypothetical protein
1532434	-1.80833	1.42e-15	product_name=Acyl-CoA N-acyltransferase
1141588	-1.80828	5.27e-28	product_name=Regulator of development and secondary metabolism of the velvet family. Similar to VelB/VelC|Velvet factor-domain containing protein
1537036	-1.80729	3.07e-27	product_name=hypothetical protein
1543620	-1.80703	2.26e-22	product_name=hypothetical protein
1599288	-1.80684	7.02e-31	product_name=malate synthase-like protein
1503848	-1.80601	6.62e-11	product_name=hypothetical protein
1356478	-1.80541	3.9e-13	product_name=hypothetical protein
1365006	-1.80516	2.06e-19	product_name=RNA pseudouridylate synthase domain-containing protein 2
1497021	-1.80472	3.73e-35	product_name=P-loop containing nucleoside triphosphate hydrolase protein
1476275	-1.80291	3.04e-23	product_name=guanine-N(1)--methyltransferase
1539852	-1.80199	1.99e-10	product_name=hypothetical protein
1528351	-1.80066	4.01e-21	product_name=C2H2-type zinc finger transcription factor
1365250	-1.79916	7.31e-20	product_name=Eukaryotic and archaeal DNA primase%2C large subunit-domain containing protein
1473738	-1.79807	3.02e-25	product_name=Protein phosphatase 2C (PP2C)-like domain-containing protein
1493298	-1.79604	2.74e-20	product_name=kinase-like domain-containing protein
1518160	-1.79564	1.07e-28	product_name=hypothetical protein
1537552	-1.79487	8.2e-19	product_name=hypothetical protein
1546216	-1.79053	3.77e-41	product_name=Lipin/Ned1/Smp2-domain-containing protein
1161729	-1.78978	1.04e-05	product_name=hypothetical protein
1585126	-1.78961	1.94e-47	product_name=hypothetical protein
1549534	-1.7896	7.65e-23	product_name=hypothetical protein
1488326	-1.78862	5.59e-21	product_name=hypothetical protein
1545795	-1.78692	2.45e-14	product_name=hypothetical protein
1377842	-1.78503	1.15e-31	product_name=hypothetical protein
1479203	-1.7844	1.23e-19	product_name=RNA cap guanine-N2 methyltransferase-domain-containing protein
1379047	-1.78309	2.57e-15	product_name=NUDIX family hydrolase
1506327	-1.78225	0.000409593	product_name=hypothetical protein
1543622	-1.78168	0.0193017	product_name=hypothetical protein
1508859	-1.77931	8.43e-29	product_name=Caleosin related protein-domain-containing protein
1533714	-1.77708	3.45e-06	product_name=Basic-leucine zipper (bZIP) transcription factor|basic-leucine zipper transcription factor OAC99923.1 basic-leucine zipper transcription factor
1571951	-1.77575	1.13e-07	product_name=hypothetical protein
1126324	-1.77498	2.67e-20	product_name=ras guanine nucleotide exchange factor domain-containing protein
1363444	-1.77483	0.0345229	product_name=hypothetical protein
1468220	-1.77439	3.44e-16	product_name=hypothetical protein
1538657	-1.77317	9.49e-06	product_name=Glyoxalase/Bleomycin resistance protein/Dihydroxybiphenyl dioxygenase
1377156	-1.77204	6.56e-33	product_name=hypothetical protein
1392856	-1.77175	6.5e-07	product_name=hypothetical protein
1588316	-1.77013	6.93e-22	product_name=PRELI-like family-domain containing protein
1592288	-1.77008	4.58e-08	product_name=Glycoside hydrolase superfamily
1536314	-1.76922	8.98e-08	product_name=homeobox domain-containing protein
1537005	-1.76833	5.87e-32	product_name=SacI homology domain-domain containing protein
1539894	-1.76824	3.28e-29	product_name=P-loop containing nucleoside triphosphate hydrolase protein
1486670	-1.76734	4.1e-30	product_name=Chaperonin Cpn60/TCP-1 family
1493756	-1.76511	1.62e-46	product_name=Major facilitator superfamily domain-containing protein
1599792	-1.76459	5.74e-30	product_name=Armadillo-type fold
1535063	-1.76411	7.35e-05	product_name=hypothetical protein
1587567	-1.76387	1.36e-29	product_name=Protein kinase-like domain-containing protein
1350043	-1.76208	2.64e-13	product_name=Glutathione S-transferase%2C C-terminal-like protein
1498084	-1.76204	8.88e-20	product_name=Thiolase%2C N-terminal domain-domain containing protein
1378841	-1.76156	1.08e-26	product_name=hypothetical protein
1517075	-1.7608	9.92e-25	product_name=Nin one binding Zn-ribbon like-domain-containing protein
1457528	-1.75851	4.78e-24	product_name=mitochondrial carrier domain-containing protein
1383759	-1.75748	2.13e-14	product_name=tRNA-guanine(15) transglycosylase-like protein
1568065	-1.75534	7.85e-06	product_name=hypothetical protein
1529691	-1.7544	0.000789445	product_name=hypothetical protein
1512522	-1.75168	1.6e-26	product_name=hypothetical protein
1467188	-1.7497	1.48e-25	product_name=AAA-domain-containing protein
1552253	-1.74864	3.36e-23	product_name=Histidine phosphatase superfamily
1447121	-1.74728	4.47e-22	product_name=hypothetical protein
1538864	-1.74722	2.12e-32	product_name=ribosomal protein subunit S4
1358715	-1.747	8.35e-26	product_name=WD40-repeat-containing domain protein
1484801	-1.74688	7.3e-30	product_name=Fungal specific transcription factor|fungal-specific transcription factor
1375698	-1.74659	4.63e-64	product_name=hypothetical protein
1461448	-1.74415	0.0324108	product_name=Gtr1/RagA G protein conserved region-domain containing protein
1509123	-1.74227	1.64e-27	product_name=hypothetical protein
1490470	-1.74123	6.78e-11	product_name=hypothetical protein
1090429	-1.74107	2.97e-23	product_name=WD40-repeat-containing domain protein
1493019	-1.73988	3.47e-06	product_name=hypothetical protein
1556487	-1.73903	6.77e-25	product_name=peptidase M18
1461411	-1.73848	2.29e-23	product_name=hypothetical protein
1562057	-1.73839	0.000728774	product_name=hypothetical protein
1471890	-1.73751	2.46e-28	product_name=Poly(A) polymerase central domain-containing protein
1341530	-1.73664	3.1e-19	product_name=hypothetical protein
1497644	-1.73635	1.48e-05	product_name=hypothetical protein
1481463	-1.73517	8.64e-21	product_name=hypothetical protein
1524865	-1.7318	1.77e-21	product_name=hypothetical protein
1552246	-1.72894	0.0420615	product_name=hypothetical protein
1531510	-1.72776	1.17e-26	product_name=hypothetical protein
1532048	-1.72771	3.78e-32	product_name=Ribokinase-like protein
1487441	-1.72753	1.07e-19	product_name=hypothetical protein
1501312	-1.72698	7.2e-28	product_name=chromatin structure-remodeling complex protein RSC7
1462870	-1.72275	5.09e-15	product_name=Formate--tetrahydrofolate ligase-domain containing protein
1514118	-1.72207	2.39e-10	product_name=Dbl homology domain-containing protein
1469072	-1.72184	1.41e-15	product_name=Rrp15p-domain containing protein
1483794	-1.7215	6.48e-05	product_name=hypothetical protein
1477137	-1.72101	2.52e-21	product_name=histone H3 ORX47001.1 histone H3 ORX51878.1 histone H3
1594373	-1.72046	0.000227374	product_name=Armadillo-type fold
1553539	-1.71843	4.07e-33	product_name=Domain found in IF2B/IF5-domain containing protein
1464774	-1.71834	2.49e-22	product_name=Homeodomain-like DNA binding domain-containing transcription factor
1480448	-1.71809	7.21e-18	product_name=hypothetical protein
1353121	-1.7178	2.61e-30	product_name=AFG1-like ATPase-domain-containing protein
1463407	-1.71652	8.58e-25	product_name=Mo25-like protein
1110517	-1.71501	4.08e-08	product_name=transmembrane amino acid transporter protein-domain-containing protein
1534994	-1.71424	6.54e-11	product_name=hypothetical protein
1492242	-1.71326	8.76e-13	product_name=hypothetical protein
1525012	-1.71267	7.91e-46	product_name=Citrate synthase-like protein
1351144	-1.71255	0.0309961	product_name=Major facilitator superfamily domain-containing protein
1496522	-1.71223	1.67e-05	product_name=hypothetical protein
1529719	-1.71186	1.34e-36	product_name=t-SNARE
1381061	-1.7118	2.51e-23	product_name=hypothetical protein
1511890	-1.7107	1.41e-12	product_name=P-loop containing nucleoside triphosphate hydrolase protein
1599415	-1.71069	5.39e-25	product_name=hypothetical protein
1492227	-1.70891	3.21e-15	product_name=tRNAHis guanylyltransferase-domain containing protein
1539712	-1.70825	0.0145022	product_name=P-loop containing nucleoside triphosphate hydrolase protein
1356314	-1.70813	3.3e-36	product_name=hypothetical protein
1515241	-1.70744	1.38e-12	product_name=interferon-inducible GTPase-domain-containing protein
1594440	-1.70724	1.13e-19	product_name=MRC1-like domain-containing protein
1454607	-1.7071	1.36e-22	product_name=Ribokinase-like protein
1377456	-1.70664	0.0212933	product_name=Domain of unknown function (DUF4203)-domain containing protein
1388972	-1.70587	0.0363377	product_name=hypothetical protein
1601124	-1.70418	1.03e-25	product_name=hypothetical protein
1479540	-1.70402	2.92e-24	product_name=CYP509|CYP509 protein
1544569	-1.70367	7.88e-19	product_name=Mini-chromosome maintenance replisome factor-domain containing protein
1364923	-1.70175	7.85e-25	product_name=major facilitator superfamily domain-containing protein
1477151	-1.70159	5.46e-22	product_name=Histone-fold-containing protein
1592848	-1.70088	1.39e-47	product_name=ATP-dependent RNA helicase DED1
1523152	-1.70058	3.94e-22	product_name=transcription factor Opi1-domain-containing protein
1495122	-1.70057	1.48e-52	product_name=hypothetical protein
1384104	-1.7002	1.21e-33	product_name=hypothetical protein
1468749	-1.69865	9.44e-14	product_name=Protein-L-isoaspartate(D-aspartate) O-methyltransferase
1546727	-1.69798	2.32e-22	product_name=Homeodomain-like DNA binding domain-containing transcription factor
1521237	-1.69629	3.69e-23	product_name=hypothetical protein
1541958	-1.69397	7.63e-23	product_name=hypothetical protein
1594575	-1.69329	2.52e-26	product_name=hypothetical protein
1541708	-1.69308	4.17e-25	product_name=Chaperonin Cpn60/TCP-1 family
1472017	-1.69236	3.85e-25	product_name=Sec61beta family-domain-containing protein
1526937	-1.69234	1.55e-33	product_name=Mechanosensitive ion channel-domain-containing protein
1544059	-1.69222	1.58e-23	product_name=Chaperonin Cpn60/TCP-1 family
1496176	-1.69137	1.37e-29	product_name=CCCH-type Zinc finger transcription factor|CCCH-type zinc finger transcription factor OAD05179.1 CCCH-type zinc finger transcription factor
1407819	-1.68982	3.36e-31	product_name=hypothetical protein
1517252	-1.68933	1.66e-25	product_name=FAD/NAD(P)-binding domain-containing protein
1543114	-1.68909	4.94e-21	product_name=P-loop containing nucleoside triphosphate hydrolase protein
1366376	-1.6887	1.56e-14	product_name=Cyclin|hypothetical protein
1383835	-1.68818	0.00464545	product_name=hypothetical protein
1599803	-1.68805	0.0558985	product_name=Sodium:dicarboxylate symporter family-domain containing protein
1467132	-1.68773	1.06e-19	product_name=WD40-repeat-containing domain protein
1325087	-1.68682	8.76e-17	product_name=hypothetical protein
1528451	-1.68436	1.2e-13	product_name=DHHC palmitoyltransferase-domain containing protein
1555727	-1.68432	1.39e-08	product_name=nucleotide-sugar transporter-domain-containing protein
1517218	-1.68166	7.93e-11	product_name=Nucleoporin Nup85-like protein
1476831	-1.67951	1.38e-24	product_name=hypothetical protein
1542924	-1.67833	3.6e-16	product_name=Thymidylate synthase/dCMP hydroxymethylase domain-containing protein
1379918	-1.67812	5.67e-19	product_name=TH1 protein
1353146	-1.6778	3.49e-13	product_name=origin recognition complex subunit 5-like protein
1570085	-1.67723	8.62e-23	product_name=hypothetical protein
1599218	-1.67674	8.77e-28	product_name=ATPase GET3
1553630	-1.67642	1.54e-44	product_name=hypothetical protein
1363928	-1.67583	1.4e-18	product_name=hypothetical protein
1505782	-1.67386	2.02e-15	product_name=DNA-directed RNA polymerase
1515228	-1.67312	1.97e-11	product_name=hypothetical protein
1483159	-1.66989	6.69e-28	product_name=FAD binding domain-domain containing protein
1458157	-1.66934	0.00269147	product_name=hypothetical protein
1454016	-1.66871	1.19e-38	product_name=hypothetical protein
1472194	-1.66824	0.00863454	product_name=hypothetical protein
1532173	-1.66781	2.02e-24	product_name=Homeodomain-like DNA binding domain-containing transcription factor
1324484	-1.66749	3.01e-28	product_name=P-loop containing nucleoside triphosphate hydrolase protein
1372613	-1.66744	1.43e-18	product_name=S-adenosyl-L-methionine-dependent methyltransferase
1463991	-1.66741	8.18e-19	product_name=ClpP/crotonase-like domain-containing protein
1594458	-1.66714	0.00192197	product_name=SWIB/MDM2 domain-domain containing protein
1598074	-1.66677	0.0456669	product_name=helix-loop-helix DNA-binding domain-containing transcription factor
1598271	-1.6667	4.47e-16	product_name=metallophosphoesterase domain-containing protein
1353183	-1.6661	2.19e-18	product_name=Pyrimidine 5'-nucleotidase
1519129	-1.66403	1.86e-22	product_name=hypothetical protein
1531690	-1.66337	5.17e-21	product_name=CoA-transferase family III domain-containing protein
1453124	-1.65873	2.99e-18	product_name=translation initiation factor eIF 4e-like domain-containing protein
1486686	-1.65808	1.4e-36	product_name=C2 domain-containing protein
1471195	-1.65756	0.00441739	product_name=Oxysterol-binding protein-domain containing protein
1505703	-1.65698	3.54e-22	product_name=armadillo-type protein
1480700	-1.65617	1.12e-16	product_name=hypothetical protein
1484050	-1.65599	5e-17	product_name=hypothetical protein
1475249	-1.65533	1.97e-35	product_name=hypothetical protein
1531102	-1.65477	5.41e-30	product_name=SNF2 family N-terminal domain-containing protein
1596883	-1.65471	3.31e-28	product_name=pyruvate dehydrogenase
1540588	-1.65388	2.11e-22	product_name=UDP-glucose/GDP-mannose dehydrogenase family%2C NAD binding domain-domain containing protein
1447512	-1.65337	1.77e-12	product_name=cation efflux family-domain-containing protein
1442942	-1.65289	5e-13	product_name=expressed protein
1455312	-1.65206	2.39e-37	product_name=hypothetical protein
1585462	-1.65167	0.0503753	product_name=hypothetical protein
1597426	-1.65149	9.22e-17	product_name=hypothetical protein
1507145	-1.65071	3.14e-16	product_name=hypothetical protein
1539249	-1.6506	4.58e-20	product_name=Eukaryotic translation initiation factor 3 subunit J
1458607	-1.64947	4.55e-19	product_name=hypothetical protein
1415883	-1.64881	4.74e-14	product_name=Telomerase ribonucleoprotein complex - RNA binding domain-domain containing protein
1507952	-1.64813	8.5e-19	product_name=hypothetical protein
1451569	-1.64738	7.81e-06	product_name=OPT oligopeptide transporter protein-domain containing protein
1471074	-1.64662	9.27e-18	product_name=CMGC/DYRK/YAK protein kinase
1336324	-1.64485	6.78e-25	product_name=60s Acidic ribosomal protein-domain containing protein
1512327	-1.64462	1.13e-15	product_name=hypothetical protein
1458170	-1.64418	1.73e-14	product_name=Mitochondrial fission ELM1-domain containing protein
1373133	-1.64295	0.0350008	product_name=hypothetical protein
1506142	-1.64283	1.07e-11	product_name=Ribonuclease H2%2C subunit B
1563956	-1.64215	1.46e-19	product_name=CDC45-like protein-domain containing protein
1502874	-1.64143	1.68e-19	product_name=maintenance of ploidy protein mob2
1524882	-1.64065	4.94e-25	product_name=hypothetical protein
1468406	-1.64016	9e-22	product_name=hypothetical protein
1514203	-1.63967	1.42e-24	product_name=Malonyl-CoA decarboxylase (MCD)-domain containing protein
1560519	-1.63942	1.41e-30	product_name=small G-protein Ras2
1484154	-1.63819	1.78e-08	product_name=Ferroporti-1
1517516	-1.63695	0.0207229	product_name=hypothetical protein
1346779	-1.63647	2.15e-28	product_name=diacylglycerol O-acyltransferase
1367673	-1.63505	1.5e-24	product_name=peptide chain release factor eRF/aRF subunit 1
1454122	-1.63431	5.92e-07	product_name=expressed protein
1555562	-1.63289	1.62e-18	product_name=SAM-dependent RNA methyltransferase
1536790	-1.6324	3.57e-17	product_name=hypothetical protein
1527200	-1.63179	3.78e-15	product_name=Histone H3-K56 acetyltransferase
1556949	-1.63171	1.29e-28	product_name=Sodium/calcium exchanger protein-domain containing protein
1530130	-1.63065	8.32e-30	product_name=SNF2 family N-terminal domain-containing protein
1562323	-1.62858	3.15e-25	product_name=hypothetical protein
1377605	-1.62809	2.79e-12	product_name=UAA transporter
1526608	-1.62751	1.09e-18	product_name=Fungal specific transcription factor|fungal-specific transcription factor OAD00656.1 fungal-specific transcription factor
1344607	-1.62688	5.82e-17	product_name=hypothetical protein
[truncated: 3,480 more rows]

## Sheet: YvsMM
GeneID	log2(FC)	P-value
1448224	-15.3181	2.94866e-35	product_name=hypothetical protein
1468199	-14.2897	3.7972e-44	product_name=Carbohydrate-Binding Module Family 13 protein|carbohydrate-binding module family 13 protein OAD01005.1 carbohydrate-binding module family 13 protein
1369475	-13.8463	1.79882e-31	product_name=hypothetical protein
1472783	-13.5244	2.86147e-30	product_name=hypothetical protein
1322359	-13.4736	1.38937e-29	product_name=Cyclin|cyclin OAD02551.1 cyclin
1443186	-12.8654	3.33776e-27	product_name=Domain of unknown function (DUF3472)-domain containing protein
1593794	-12.6953	1.4579e-26	product_name=SURF4 family-domain-containing protein
1547932	-12.6335	7.70302e-35	product_name=hypothetical protein
1454192	-12.5597	1.70112e-34	product_name=hypothetical protein
1441627	-12.5199	2.55093e-25	product_name=hypothetical protein
1333389	-12.4643	7.05895e-49	product_name=hypothetical protein
1373664	-12.457	1.88098e-25	product_name=hypothetical protein
1515926	-12.3825	8.4632e-234	product_name=phosphoesterase family-domain-containing protein
1502884	-12.3758	2.59742e-25	product_name=Distantly related to plant expansins|RlpA-like double-psi beta-barrel-containing protein domain-containing protein
1448367	-12.2978	4.13211e-25	product_name=hypothetical protein
1488884	-12.1257	2.97698e-24	product_name=Isochorismatase-like protein
1519605	-12.0713	4.93017e-60	product_name=hypothetical protein
1476307	-12.0512	2.74742e-24	product_name=Homeodomain-like DNA binding domain-containing transcription factor
1457562	-12.0495	6.32307e-31	product_name=hypothetical protein
1523296	-11.952	6.46756e-24	product_name=hypothetical protein
1451796	-11.8733	2.03744e-23	product_name=hypothetical protein
1526739	-11.8513	3.98229e-23	product_name=hypothetical protein
1476268	-11.8449	8.03033e-23	product_name=expressed protein
1024558	-11.7121	1.21222e-22	product_name=expressed protein
1383596	-11.6923	7.35554e-23	product_name=hypothetical protein
1587351	-11.6753	7.17181e-181	product_name=general substrate transporter
1552830	-11.6664	8.05087e-23	product_name=helix-loop-helix DNA-binding domain-containing transcription factor
1484981	-11.6625	9.04586e-30	product_name=hypothetical protein
1502576	-11.6577	1.06822e-22	product_name=hypothetical protein
1586244	-11.6538	1.57616e-111	product_name=hypothetical protein
1394464	-11.6128	1.55458e-22	product_name=hypothetical protein
1593485	-11.5711	2.47329e-42	product_name=hypothetical protein
1393315	-11.5496	1.44881e-42	product_name=cation-transporting ATPase
1514327	-11.5174	3.67945e-42	product_name=hypothetical protein
1593588	-11.4978	6.87724e-22	product_name=Distantly related to plant expansins|hypothetical protein
1386343	-11.4916	6.18702e-22	product_name=hypothetical protein
1539681	-11.4505	3.11644e-27	product_name=lipase
1115782	-11.3621	1.6887e-41	product_name=glycoside hydrolase family 3 protein
1349755	-11.321	3.29078e-21	product_name=Aspartic peptidase domain-containing protein
1383598	-11.3149	2.10819e-21	product_name=hypothetical protein
1477579	-11.3094	3.10504e-79	product_name=glycosyltransferase|Glycosyltransferase Family 1 protein
1586987	-11.2926	3.68063e-41	product_name=transmembrane amino acid transporter protein-domain-containing protein
1473364	-11.2741	9.85141e-28	product_name=apses-type HTH transcription regulator
1585139	-11.2051	1.17571e-74	product_name=Glutathione S-transferase%2C C-terminal-like protein
1497478	-11.1448	1.7113e-20	product_name=hypothetical protein
1446565	-11.1342	1.51164e-20	product_name=hypothetical protein
1416796	-11.1341	1.49752e-20	product_name=expressed protein
1149678	-11.1314	2.16716e-20	product_name=hypothetical protein
1352308	-11.1266	2.48632e-63	product_name=hypothetical protein
1465853	-11.1052	1.61277e-20	product_name=hypothetical protein
1496180	-11.0952	3.23989e-20	product_name=vitamin H transporter
1438866	-11.0813	4.36133e-27	product_name=carbohydrate esterase family 4 protein
1355828	-11.0346	1.84896e-20	product_name=carbohydrate esterase|Carbohydrate Esterase Family 4 protein
1137052	-11.0297	2.74987e-20	product_name=hypothetical protein
1482707	-10.9411	8.48716e-20	product_name=Sodium:solute symporter family-domain containing protein
1504155	-10.9256	2.28425e-19	product_name=expressed protein
1468184	-10.9098	7.78068e-20	product_name=Alpha/Beta hydrolase protein
1378572	-10.8585	7.77526e-20	product_name=p53-like transcription factor|p53-like transcription factor OAC99448.1 p53-like transcription factor
1478401	-10.8446	3.00725e-195	product_name=hypothetical protein
1362081	-10.8134	1.37919e-24	product_name=glycoside hydrolase family 3 protein
1393483	-10.797	7.54611e-21	product_name=hypothetical protein
1392237	-10.7915	1.22071e-30	product_name=hypothetical protein
1516339	-10.7693	3.20283e-25	product_name=fork head domain-containing protein
1557440	-10.7679	1.58393e-19	product_name=hypothetical protein
1032205	-10.7587	1.64042e-19	product_name=major facilitator superfamily domain-containing protein
1590114	-10.7529	4.36652e-19	product_name=acyl-CoA oxidase
1375399	-10.6912	1.12479e-47	product_name=Fungal specific transcription factor domain-domain containing protein
1454892	-10.6608	1.47137e-57	product_name=nucleotide-diphospho-sugar transferase
1574963	-10.6509	4.64411e-25	product_name=hypothetical protein
1553141	-10.6246	7.00141e-25	product_name=expressed protein
1571830	-10.6172	5.23448e-19	product_name=CAP domain-containing protein
1337482	-10.5956	2.95723e-92	product_name=Metallo-dependent phosphatase-like protein
1387399	-10.5595	2.78927e-35	product_name=hypothetical protein
1586609	-10.5556	2.65402e-24	product_name=Transmembrane amino acid transporter protein-domain containing protein
1457566	-10.5506	3.22159e-18	product_name=hypothetical protein
1385661	-10.5404	6.79112e-36	product_name=benzoquinone reductase
1363977	-10.5193	2.34808e-35	product_name=hypothetical protein
1499300	-10.499	1.22924e-45	product_name=Isocitrate lyase
1499672	-10.4826	1.08115e-18	product_name=hypothetical protein
1443421	-10.4259	2.92286e-18	product_name=hypothetical protein
1474926	-10.4218	8.90144e-89	product_name=hypothetical protein
1513144	-10.4073	9.79733e-35	product_name=hypothetical protein
1378313	-10.3997	5.8407e-18	product_name=hypothetical protein
1575360	-10.3826	1.13049e-23	product_name=hypothetical protein
1469869	-10.3778	6.50198e-46	product_name=hypothetical protein
1455232	-10.369	9.23258e-176	product_name=Nicotianamine synthase
1376132	-10.354	1.24582e-287	product_name=ABC-2 type transporter-domain-containing protein
1378177	-10.3342	9.04578e-24	product_name=WD40-repeat-containing domain protein
1480198	-10.3304	3.71769e-82	product_name=nucleotide-diphospho-sugar transferase
1348566	-10.3122	5.93002e-42	product_name=hypothetical protein
1393405	-10.3064	3.45151e-17	product_name=hypothetical protein
1463387	-10.3051	7.23438e-126	product_name=glycoside hydrolase|Glycoside Hydrolase Family 16 protein
1598061	-10.2593	9.89803e-18	product_name=hypothetical protein
1106431	-10.2571	2.86113e-17	product_name=hypothetical protein
1589592	-10.2565	1.75387e-42	product_name=hypothetical protein
1540000	-10.2477	1.28794e-301	product_name=Zinc/iron permease
1380646	-10.2263	5.89976e-34	product_name=carbohydrate esterase|Carbohydrate Esterase Family 4 protein
1457564	-10.1822	1.47066e-17	product_name=hypothetical protein
1494326	-10.149	1.49562e-64	product_name=hypothetical protein
1387063	-10.1432	4.04467e-17	product_name=hypothetical protein
1501734	-10.1037	1.05606e-112	product_name=hypothetical protein
1590387	-10.0948	2.17641e-31	product_name=expressed protein
1483422	-10.088	3.40688e-52	product_name=hypothetical protein
1330660	-10.0837	5.62191e-17	product_name=hypothetical protein
1529878	-10.0741	2.2066e-16	product_name=expressed protein
1509398	-10.0561	6.14477e-17	product_name=hypothetical protein
1362943	-10.0536	2.74367e-67	product_name=ABC-2 type transporter-domain containing protein
1079491	-10.0511	4.20639e-17	product_name=VTC domain-domain containing protein
1587645	-10.0468	4.294e-17	product_name=hypothetical protein
1363436	-10.0237	3.78037e-17	product_name=plasma membrane proteolipid 3
1498476	-9.98933	4.20919e-32	product_name=CRAL-TRIO domain-containing protein
1571215	-9.98612	4.18313e-22	product_name=hypothetical protein
1490736	-9.97643	0	product_name=hypothetical protein
1445386	-9.97055	9.76033e-17	product_name=Homeodomain-like DNA binding domain-containing transcription factor
1542977	-9.97012	1.02808e-16	product_name=hypothetical protein
1593501	-9.96787	4.12327e-42	product_name=hypothetical protein
1371143	-9.96745	3.96303e-78	product_name=hypothetical protein
1341746	-9.9597	1.26261e-16	product_name=CAP domain-containing protein
1353007	-9.9533	9.35195e-17	product_name=hypothetical protein
1453499	-9.93701	2.76749e-51	product_name=hypothetical protein
1391507	-9.93685	3.77984e-16	product_name=hypothetical protein
1465337	-9.89636	3.75348e-41	product_name=Chitin synthase|chitin synthase-domain-containing protein
1447330	-9.86803	6.72735e-186	product_name=Domain of unknown function (DUF3472)-domain containing protein
1391804	-9.83049	2.32455e-39	product_name=C2H2-type zinc finger transcription factor
1454092	-9.82709	1.60648e-21	product_name=Up-regulated During Septation-domain containing protein
1528014	-9.82176	5.20907e-41	product_name=TKL protein kinase
1349448	-9.80041	2.68083e-40	product_name=Regulator of transcription similar to AbaA|TEA/ATTS domain family-domain containing protein
1479123	-9.78784	6.25585e-49	product_name=expressed protein
1512902	-9.77909	0	product_name=hypothetical protein
1492358	-9.75086	4.48497e-59	product_name=hypothetical protein
1484838	-9.73503	2.1499e-118	product_name=Dolichyl-phosphate-mannose-protein mannosyltransferase-domain-containing protein
1590358	-9.73437	6.97459e-16	product_name=hypothetical protein
1466398	-9.72716	8.14531e-31	product_name=Bestrophin%2C RFP-TM%2C chloride channel-domain-containing protein
1516403	-9.72535	5.33512e-22	product_name=hypothetical protein
1600533	-9.72502	3.14426e-16	product_name=hypothetical protein
1380467	-9.71785	3.71435e-16	product_name=C2H2-type Zinc finger transcription factor|hypothetical protein
1511317	-9.71661	3.32799e-16	product_name=hypothetical protein
1579556	-9.71627	9.56173e-16	product_name=sulfate transporter family-domain-containing protein
1535163	-9.70894	1.18936e-15	product_name=expressed protein
1382242	-9.70564	3.89445e-40	product_name=VTC domain-domain containing protein
1468191	-9.7007	1.29789e-30	product_name=hypothetical protein
1132811	-9.68707	1.53584e-29	product_name=transmembrane amino acid transporter protein-domain-containing protein
1578203	-9.68217	4.91929e-16	product_name=hypothetical protein
1577746	-9.67713	9.10926e-16	product_name=hypothetical protein
1373830	-9.66947	5.95013e-15	product_name=hypothetical protein
1083516	-9.64899	1.32819e-15	product_name=hypothetical protein
1509666	-9.6336	3.92752e-48	product_name=expressed protein
1540842	-9.63346	5.4574e-20	product_name=hypothetical protein
1439925	-9.63013	1.2146e-15	product_name=expressed protein
1566922	-9.62619	1.13339e-15	product_name=hypothetical protein
1025592	-9.62088	3.41823e-15	product_name=hypothetical protein
1514784	-9.62035	3.38199e-20	product_name=Major facilitator superfamily domain-containing protein
1509395	-9.61297	8.67399e-16	product_name=hypothetical protein
1547057	-9.58606	2.02137e-108	product_name=hypothetical protein
1019783	-9.58523	1.50433e-15	product_name=hypothetical protein
1497643	-9.5716	6.70624e-39	product_name=expressed protein
1528841	-9.53601	9.15154e-230	product_name=Pyridoxal phosphate-dependent transferase
1448245	-9.52601	3.23978e-15	product_name=hypothetical protein
1552005	-9.5203	1.69138e-187	product_name=V-type ATPase%2C V0 complex%2C 116kDa subunit family
1356221	-9.50766	1.57555e-55	product_name=hypothetical protein
1380523	-9.48933	8.13498e-20	product_name=hypothetical protein
1346507	-9.48893	1.40201e-68	product_name=glycosyltransferase|Glycosyltransferase Family 39 protein
1481426	-9.47341	4.0246e-37	product_name=S-adenosyl-L-methionine-dependent methyltransferase
1457376	-9.45154	1.07341e-19	product_name=hypothetical protein
1453998	-9.44121	2.59466e-15	product_name=Glycoside hydrolase superfamily
1383244	-9.44058	3.43511e-71	product_name=Glycosyl hydrolases family 18-domain containing protein
1600498	-9.44039	4.67229e-66	product_name=hypothetical protein
1518335	-9.42122	2.38963e-117	product_name=hypothetical protein
1359117	-9.40348	1.62885e-36	product_name=glycoside hydrolase|Glycoside Hydrolase Family 16 protein
1365835	-9.38957	1.42216e-28	product_name=UBC-like protein
1493017	-9.37928	4.01063e-35	product_name=hypothetical protein
1569508	-9.37034	9.58685e-15	product_name=hypothetical protein
1319968	-9.36801	8.53701e-136	product_name=Alpha/Beta hydrolase protein
1497398	-9.36474	5.25073e-174	product_name=Transcription factor E2F/dimerisation partner (TDP)|transcription factor E2F/dimerization partner OAD05309.1 transcription factor E2F/dimerization partner
1545013	-9.36122	2.26928e-29	product_name=lipase
1444712	-9.35763	3.16721e-36	product_name=SBF-like CPA transporter family (DUF4137)-domain containing protein
1548540	-9.34551	1.01495e-79	product_name=hypothetical protein
1373145	-9.34391	2.62766e-19	product_name=hypothetical protein
1361204	-9.34306	2.2643e-24	product_name=Basic-leucine zipper (bZIP) transcription factor|basic-leucine zipper transcription factor
1180041	-9.34005	1.55956e-19	product_name=expressed protein
1357320	-9.31774	1.16593e-102	product_name=Cys/Met metabolism PLP-dependent enzyme-domain containing protein
1544092	-9.31591	2.46185e-62	product_name=hypothetical protein
1487666	-9.29827	1.79756e-14	product_name=Phosphocarrier HPr protein-like protein
1384657	-9.2979	8.42389e-28	product_name=kinase-like domain-containing protein
1553990	-9.29761	2.16281e-19	product_name=hypothetical protein
1414357	-9.29724	1.55862e-14	product_name=hypothetical protein
1353013	-9.27542	2.69374e-14	product_name=hypothetical protein
1593471	-9.25558	9.74855e-55	product_name=GroES (chaperonin 10)-like protein
1409830	-9.25271	2.49196e-14	product_name=hypothetical protein
1500712	-9.23755	3.09689e-78	product_name=hypothetical protein
1584924	-9.22441	7.05563e-28	product_name=major facilitator superfamily domain-containing protein
1382443	-9.20876	5.36887e-19	product_name=CotH protein-domain containing protein
1546527	-9.20506	2.42414e-14	product_name=hypothetical protein
1465138	-9.20035	4.78732e-14	product_name=Dbl homology domain-containing protein
1324359	-9.19327	2.79844e-18	product_name=hypothetical protein
1466081	-9.17924	8.6675e-61	product_name=dihydroxy-acid dehydratase
1601398	-9.17863	4.13615e-44	product_name=General substrate transporter
1511387	-9.1761	2.86225e-51	product_name=protoplast secreted protein 2 precursor
1538080	-9.14719	3.13031e-35	product_name=hypothetical protein
1586684	-9.11239	1.1562e-42	product_name=hypothetical protein
1339121	-9.10358	6.32325e-14	product_name=phosphatidylglycerol/phosphatidylinositol transfer protein precursor
1451663	-9.09272	2.30517e-18	product_name=Interferon-inducible GTPase (IIGP)-domain containing protein
1459189	-9.0876	3.48485e-18	product_name=Homeodomain-like DNA binding domain-containing transcription factor|Homeodomain-like DNA binding domain-containing transcription factor OAD02361.1 Homeodomain-like DNA binding domain-containing transcription factor
1054460	-9.08539	3.28428e-14	product_name=hypothetical protein
1473385	-9.08139	3.12407e-43	product_name=Dynein light intermediate chain (DLIC)-domain containing protein
1463924	-9.07921	6.7153e-34	product_name=hypothetical protein
1473065	-9.0781	1.82005e-254	product_name=hypothetical protein
1385881	-9.06563	1.35219e-26	product_name=guanine nucleotide binding protein
1442722	-9.06301	1.76179e-18	product_name=Protein of unknown function (DUF3808)-domain containing protein
1523206	-9.06169	1.1361e-26	product_name=hypothetical protein
1594582	-9.03435	3.26062e-163	product_name=Nucleotide-diphospho-sugar transferase
1461684	-9.02802	1.67586e-26	product_name=hypothetical protein
1463888	-9.02771	6.42286e-51	product_name=Domain of unknown function (DUF4203)-domain containing protein
1363444	-9.02557	6.59413e-127	product_name=hypothetical protein
1550370	-9.01195	3.20905e-18	product_name=hypothetical protein
1052100	-8.99863	1.48515e-13	product_name=hypothetical protein
1348871	-8.9984	1.13775e-119	product_name=hypothetical protein
1332752	-8.9936	3.44012e-26	product_name=FAM72 protein-domain containing protein
1105922	-8.98897	0	product_name=expressed protein
1490465	-8.98692	5.31202e-18	product_name=expressed protein
1584609	-8.96063	8.11929e-14	product_name=hypothetical protein
1552541	-8.95627	3.28522e-130	product_name=Septin-domain containing protein
1391899	-8.95086	1.61001e-98	product_name=hypothetical protein
1506074	-8.94955	7.92205e-14	product_name=hypothetical protein
1476430	-8.94816	6.53987e-26	product_name=hypothetical protein
1503785	-8.94494	8.98665e-42	product_name=Putative integral membrane protein conserved region (DUF2404)-domain containing protein
1546573	-8.93652	0	product_name=Protein of unknown function (DUF3419)-domain containing protein
1355139	-8.93556	9.90595e-16	product_name=p53-like transcription factor
1479947	-8.93422	2.90768e-13	product_name=hypothetical protein
1492697	-8.93368	1.01741e-13	product_name=carbohydrate-binding module family 21 protein
1538134	-8.92923	1.14894e-13	product_name=hypothetical protein
1539812	-8.92855	6.71428e-45	product_name=hypothetical protein
1457521	-8.92264	2.55474e-39	product_name=cytochrome P450
1527021	-8.90601	7.88251e-48	product_name=hypothetical protein
1333806	-8.89779	2.62053e-13	product_name=hypothetical protein
1542703	-8.89735	4.81063e-41	product_name=Isochorismatase-like protein
1393153	-8.8884	8.9544e-124	product_name=Glutathione S-transferase%2C C-terminal-like protein
1392316	-8.88646	3.97717e-39	product_name=P-loop containing nucleoside triphosphate hydrolase protein
1393702	-8.8614	1.296e-184	product_name=hypothetical protein
1452310	-8.85925	1.11503e-178	product_name=hypothetical protein
1481893	-8.85915	0	product_name=aldehyde dehydrogenase domain-containing protein
1508214	-8.85652	1.66397e-13	product_name=hypothetical protein
1445047	-8.85479	2.89543e-106	product_name=Alpha/Beta hydrolase fold
1357419	-8.8481	1.54824e-13	product_name=hypothetical protein
1469656	-8.84623	1.5405e-67	product_name=hypothetical protein
1348131	-8.8449	2.41057e-13	product_name=major facilitator superfamily domain-containing protein
1366214	-8.82987	6.88835e-56	product_name=hypothetical protein
1494895	-8.82934	1.20496e-53	product_name=SCP2 sterol-binding domain-containing protein
1511544	-8.82886	8.14657e-63	product_name=hypothetical protein
1395629	-8.81098	6.47444e-48	product_name=hypothetical protein
1526154	-8.79651	3.46537e-100	product_name=Squalene/phytoene synthase-domain containing protein
1498841	-8.79266	2.10036e-60	product_name=hypothetical protein
1538657	-8.79251	0	product_name=Glyoxalase/Bleomycin resistance protein/Dihydroxybiphenyl dioxygenase
1588095	-8.78483	3.13143e-68	product_name=hypothetical protein
1543245	-8.78261	2.68175e-70	product_name=hypothetical protein
1473416	-8.7738	6.24182e-13	product_name=hypothetical protein
1467489	-8.75984	4.47384e-227	product_name=Aldehyde/histidinol dehydrogenase
1513058	-8.74589	8.49867e-22	product_name=expressed protein
1370017	-8.74389	3.72213e-120	product_name=Carbohydrate-Binding Module Family 13 protein|carbohydrate-binding module family 13 protein OAD07037.1 carbohydrate-binding module family 13 protein
1483228	-8.74153	5.1328e-84	product_name=hypothetical protein
1519473	-8.73831	2.29089e-93	product_name=inositol oxygenase
1353195	-8.73758	5.57669e-145	product_name=hypothetical protein
1449029	-8.72554	1.31677e-45	product_name=hypothetical protein
1389517	-8.69808	6.00663e-13	product_name=hypothetical protein
1434564	-8.68048	1.04001e-12	product_name=expressed protein
1498717	-8.67632	2.375e-09	product_name=hypothetical protein
1383286	-8.67126	5.41633e-13	product_name=hypothetical protein
1575171	-8.66764	2.18796e-12	product_name=major facilitator superfamily domain-containing protein
1481759	-8.66706	1.10039e-92	product_name=hypothetical protein
1388883	-8.6645	1.2772e-31	product_name=chitinase
1591735	-8.66036	1.50222e-31	product_name=hypothetical protein
1447345	-8.65834	2.14416e-12	product_name=hypothetical protein
1465108	-8.64644	1.06418e-228	product_name=isocitrate dehydrogenase|isocitrate dehydrogenase NAD-dependent Subunit 1
1595812	-8.64602	6.39869e-68	product_name=hypothetical protein
1464428	-8.64421	1.59048e-53	product_name=Domain of unknown function (DUF4203)-domain containing protein
1522906	-8.64396	1.67082e-45	product_name=Septin-type guanine nucleotide-binding (G) domain-containing protein
1452228	-8.64342	5.12438e-24	product_name=Domain of unknown function DUF221-domain containing protein
1551968	-8.64273	1.28607e-59	product_name=expressed protein
1395292	-8.64199	2.37942e-31	product_name=hypothetical protein
1530213	-8.64062	0	product_name=hypothetical protein
1441302	-8.62978	1.02688e-41	product_name=hypothetical protein
1477825	-8.62339	1.09182e-38	product_name=Translation Initiation factor eIF- 4e-like domain-containing protein
1464670	-8.60794	4.32138e-74	product_name=hypothetical protein
1590549	-8.59949	1.91296e-141	product_name=glycosyltransferase|Glycosyltransferase Family 39 protein
1583656	-8.59301	8.48285e-13	product_name=hypothetical protein
1549319	-8.58778	5.225e-138	product_name=hypothetical protein
1365502	-8.58319	3.7822e-79	product_name=hypothetical protein
1518816	-8.56796	0	product_name=Reticulon-domain containing protein
1394291	-8.55752	2.77682e-87	product_name=hypothetical protein
1547377	-8.55474	1.03795e-208	product_name=hypothetical protein
1144134	-8.54234	1.53263e-22	product_name=hypothetical protein
1500658	-8.53927	2.16777e-06	product_name=hypothetical protein
1565900	-8.53563	9.29397e-12	product_name=hypothetical protein
1445711	-8.50582	1.49984e-23	product_name=hypothetical protein
1446501	-8.49398	3.90961e-12	product_name=expressed protein
1378526	-8.48378	1.78094e-23	product_name=hypothetical protein
1468263	-8.48368	4.48818e-12	product_name=hypothetical protein
1450619	-8.47151	3.46873e-12	product_name=alpha/beta hydrolase fold-domain containing protein
1320654	-8.45926	7.04828e-88	product_name=hypothetical protein
1478984	-8.45731	2.37298e-23	product_name=hypothetical protein
1442415	-8.45403	3.11468e-37	product_name=hypothetical protein
1512207	-8.44756	1.15026e-223	product_name=hypothetical protein
1468741	-8.44229	2.00785e-22	product_name=HLH-domain-containing basic-leucine zipper (bZIP) transcription factor|HLH-domain-containing basic-leucine zipper transcription factor
1485862	-8.43765	4.71318e-23	product_name=ELO family
1578977	-8.43444	4.12128e-12	product_name=hypothetical protein
1471831	-8.43318	8.61012e-115	product_name=hypothetical protein
1557627	-8.42932	1.29496e-101	product_name=major facilitator superfamily domain-containing protein
1503772	-8.41747	1.7439e-260	product_name=hypothetical protein
1557658	-8.40642	9.94783e-51	product_name=hypothetical protein
1500193	-8.4055	7.72075e-23	product_name=hypothetical protein
1564680	-8.40145	5.79427e-258	product_name=Sodium/calcium exchanger protein-domain containing protein
1591901	-8.40084	2.97997e-173	product_name=hypothetical protein
1469302	-8.3976	6.39045e-37	product_name=Zn(2)-C6 fungal-specific transcription factor
1498232	-8.39565	2.54248e-15	product_name=hypothetical protein
1506194	-8.39102	5.4653e-23	product_name=hypothetical protein
1367058	-8.38502	5.13359e-28	product_name=hypothetical protein
1580414	-8.38396	5.17066e-12	product_name=hypothetical protein
1492602	-8.3806	3.06593e-83	product_name=hypothetical protein
1529156	-8.37562	8.61612e-132	product_name=hypothetical protein
1474014	-8.37167	7.24032e-15	product_name=hypothetical protein
1517701	-8.37039	8.33289e-29	product_name=CoA-transferase family III domain-containing protein
1548165	-8.36864	0	product_name=Metallo-dependent phosphatase-like protein
1495537	-8.36532	2.04842e-36	product_name=CP2 transcription factor-domain-containing protein
1593638	-8.3625	1.17055e-36	product_name=hypothetical protein
1541145	-8.36146	4.14911e-12	product_name=hypothetical protein
1344098	-8.3614	1.3372e-15	product_name=hypothetical protein
1575150	-8.35641	8.7054e-45	product_name=hypothetical protein
1495540	-8.34537	1.30539e-08	product_name=cytochrome P450 CYP5203 OAD05108.1 cytochrome P450 CYP5203
1599624	-8.34239	1.1101e-21	product_name=Cation efflux protein
1374135	-8.34228	3.0108e-93	product_name=hypothetical protein
1489672	-8.32856	2.95152e-34	product_name=hypothetical protein
1476754	-8.32394	3.36847e-38	product_name=General substrate transporter
1472267	-8.31962	4.93784e-42	product_name=hypothetical protein
1352293	-8.31621	1.27162e-15	product_name=hypothetical protein
1522758	-8.31545	6.19767e-54	product_name=FAD dependent oxidoreductase
1035330	-8.31098	3.2591e-37	product_name=hypothetical protein
1381032	-8.30703	9.04413e-34	product_name=General substrate transporter
1585680	-8.29886	7.81229e-12	product_name=hypothetical protein
1502256	-8.29824	3.22803e-101	product_name=solute carrier family 2%2C facilitated glucose transporter member 3
1072233	-8.29693	1.04828e-11	product_name=hypothetical protein
1589642	-8.29619	6.51596e-14	product_name=major facilitator superfamily domain-containing protein
1393696	-8.28774	2.80991e-11	product_name=hypothetical protein
1458642	-8.28574	3.50934e-290	product_name=expressed protein
1552616	-8.28208	1.01447e-124	product_name=hypothetical protein
1382688	-8.27489	6.0554e-115	product_name=autophagy-related protein 22-like protein
1452738	-8.27219	1.17658e-21	product_name=hypothetical protein
1518395	-8.2654	1.2381e-296	product_name=major facilitator superfamily domain-containing protein
1455497	-8.26376	5.30611e-27	product_name=hypothetical protein
1544998	-8.2521	7.51605e-35	product_name=hypothetical protein
1547275	-8.24344	3.84383e-73	product_name=acyltransferase ChoActase/COT/CPT
1375246	-8.24039	2.85409e-11	product_name=hypothetical protein
1361543	-8.23936	9.7471e-12	product_name=Sulfate transporter family-domain containing protein
1518168	-8.22648	4.28612e-22	product_name=hypothetical protein
1379351	-8.22012	0	product_name=hypothetical protein
1554857	-8.21757	7.60474e-55	product_name=hypothetical protein
1466522	-8.21756	5.21072e-152	product_name=hypothetical protein
1583551	-8.2149	4.5227e-22	product_name=glucosamine 6-phosphate N-acetyltransferase
1411049	-8.20757	2.89223e-11	product_name=hypothetical protein
1594720	-8.19887	2.07115e-21	product_name=hypothetical protein
1381482	-8.19354	1.87845e-08	product_name=Carbohydrate Esterase Family 4 protein|hypothetical protein
1410471	-8.19327	3.08687e-28	product_name=Major facilitator superfamily domain-containing protein
1347481	-8.19013	5.04099e-88	product_name=P-type calcium ATPase
1599241	-8.18809	7.27396e-33	product_name=Mitochondrial carrier domain-containing protein
1370913	-8.18666	3.88419e-28	product_name=hypothetical protein
1597074	-8.18091	2.53595e-97	product_name=hypothetical protein
1513041	-8.16414	1.22439e-27	product_name=Cation/H+ exchanger
1359712	-8.15477	1.20516e-21	product_name=Major facilitator superfamily domain-containing protein
1466382	-8.14877	1.19853e-21	product_name=hypothetical protein
1341254	-8.14837	1.77543e-11	product_name=Basic-leucine zipper (bZIP) transcription factor|basic-leucine zipper transcription factor OAD06017.1 basic-leucine zipper transcription factor
1331636	-8.14586	2.43519e-11	product_name=FAM72 protein-domain containing protein
1372558	-8.14467	4.20857e-11	product_name=C2H2-type zinc finger transcription factor
1574081	-8.14365	2.37071e-11	product_name=FAS1 domain-containing protein
1508020	-8.13106	9.37664e-94	product_name=hypothetical protein
1524594	-8.11144	0	product_name=Alcohol dehydrogenase
1482274	-8.11064	1.68263e-88	product_name=p53-like transcription factor|p53-like transcription factor OAC99485.1 p53-like transcription factor
1588502	-8.1089	2.76566e-71	product_name=Endonuclease/exonuclease/phosphatase
1535656	-8.10723	0	product_name=Protein of unknown function (DUF3759)-domain containing protein
1533237	-8.10393	5.89754e-31	product_name=hypothetical protein
1530428	-8.10283	1.23247e-100	product_name=geranylgeranyl pyrophosphate synthase
1526737	-8.08868	1.34235e-232	product_name=hypothetical protein
1559317	-8.08765	3.38815e-11	product_name=Rab-GTPase-TBC domain-domain containing protein
1480121	-8.0841	2.57065e-21	product_name=expressed protein
1395916	-8.07544	1.77182e-20	product_name=C2H2-type Zinc finger transcription factor|C2H2-type zinc finger transcription factor OAD07282.1 C2H2-type zinc finger transcription factor
1447956	-8.07076	2.97237e-11	product_name=hypothetical protein
1479948	-8.05388	8.70841e-21	product_name=hypothetical protein
1386239	-8.05001	3.92491e-10	product_name=hypothetical protein
1388684	-8.04589	2.45104e-49	product_name=fork head domain-containing protein
1586608	-8.0432	1.53978e-14	product_name=hypothetical protein
1328193	-8.04205	1.40639e-10	product_name=hypothetical protein
1498854	-8.03062	1.41961e-32	product_name=ATPase%2C V1 complex%2C subunit H
1339278	-8.02758	1.63575e-20	product_name=hypothetical protein
1575109	-8.02345	9.92474e-34	product_name=kinase-like domain-containing protein
1373922	-8.02176	8.2311e-69	product_name=hypothetical protein
1381769	-8.02037	4.03196e-115	product_name=Amino acid permease-domain containing protein
1124575	-8.01799	1.15225e-13	product_name=General substrate transporter
1533932	-8.01045	8.95795e-154	product_name=glycoside hydrolase family 3 protein
1360939	-8.00567	2.04517e-10	product_name=expressed protein
1354929	-8.00226	0	product_name=Thiamin diphosphate-binding fold
1593578	-8.00173	1.73807e-14	product_name=hypothetical protein
1372401	-7.98863	8.58571e-21	product_name=hypothetical protein
1495110	-7.98616	1.9736e-51	product_name=hypothetical protein
1342161	-7.97466	0	product_name=hypothetical protein
1587543	-7.96549	4.55062e-51	product_name=hypothetical protein
1378068	-7.9551	0	product_name=Acyl-CoA dehydrogenase/oxidase%2C N-terminal and middle domain-containing protein
1370696	-7.94932	6.00016e-12	product_name=hypothetical protein
1506334	-7.9438	4.40385e-233	product_name=major facilitator superfamily domain-containing protein
1528692	-7.93778	2.58666e-16	product_name=kinase-like domain-containing protein
1062176	-7.9216	4.4256e-14	product_name=hypothetical protein
1546453	-7.90653	3.83455e-130	product_name=Peptidase S8/S53 domain-containing protein
1581017	-7.90491	3.8368e-10	product_name=hypothetical protein
1593084	-7.89323	4.98916e-14	product_name=hypothetical protein
1556858	-7.89172	9.94708e-26	product_name=hypothetical protein
1530196	-7.88001	1.0474e-83	product_name=glycosyltransferase family 2 protein
1591179	-7.87929	1.78538e-10	product_name=CP2 transcription factor
1396018	-7.86412	1.61587e-85	product_name=Mss4-like protein
1103712	-7.8584	8.69637e-10	product_name=expressed protein
1583890	-7.85394	1.91106e-13	product_name=Major facilitator superfamily domain-containing protein
1489536	-7.84891	2.56682e-94	product_name=ras family-domain-containing protein
1059940	-7.84874	5.25078e-20	product_name=Basic-leucine zipper (bZIP) transcription factor|hypothetical protein
1417931	-7.83873	5.31592e-26	product_name=hypothetical protein
1449386	-7.83778	7.10593e-14	product_name=Homeodomain-like protein
1487262	-7.83317	1.76344e-110	product_name=apses-type HTH transcription regulator
1377941	-7.82748	1.03882e-108	product_name=CRAL-TRIO domain-containing protein
1528697	-7.82179	4.70785e-92	product_name=hypothetical protein
1555123	-7.81568	5.12758e-230	product_name=hypothetical protein
1524740	-7.81106	1.00011e-42	product_name=hypothetical protein
1435482	-7.80408	1.00326e-13	product_name=hypothetical protein
1521533	-7.79209	2.23864e-37	product_name=hypothetical protein
1596438	-7.7838	1.46986e-53	product_name=hypothetical protein
1544699	-7.78353	1.87681e-238	product_name=kinase-like domain-containing protein
1551947	-7.78077	6.2362e-19	product_name=Domain of unknown function DUF21-domain containing protein
1575816	-7.78029	2.31789e-09	product_name=major facilitator superfamily domain-containing protein
1463923	-7.77317	7.709e-10	product_name=hypothetical protein
1525774	-7.76939	1.06725e-93	product_name=general substrate transporter
1572281	-7.76926	1.31913e-09	product_name=hypothetical protein
1486469	-7.76404	7.29119e-28	product_name=hypothetical protein
1590699	-7.76388	4.40712e-19	product_name=S-adenosyl-L-methionine-dependent methyltransferase
1492001	-7.7631	4.85338e-59	product_name=Acyl-CoA dehydrogenase/oxidase%2C N-terminal and middle domain-containing protein
1498157	-7.75459	7.36055e-119	product_name=gastricsin
1000305	-7.74823	1.43018e-72	product_name=ras-like protein 3
1532375	-7.74577	1.10025e-36	product_name=class III chitinase
1463599	-7.74427	1.18412e-70	product_name=Glycoside hydrolase superfamily
1443685	-7.73539	1.08305e-102	product_name=G protein beta subunit|guanine nucleotide-binding protein subunit beta KAF1807714.1 G protein beta subunit OAD01004.1 G protein beta subunit
1597341	-7.73112	2.55368e-18	product_name=hypothetical protein
1395537	-7.72879	4.63129e-68	product_name=hypothetical protein
1449373	-7.72674	1.64525e-44	product_name=SURF4 family-domain containing protein
1597489	-7.72575	1.61602e-09	product_name=hypothetical protein
1363289	-7.7202	2.90306e-13	product_name=hypothetical protein
1482436	-7.71909	3.7966e-44	product_name=WD40-repeat-containing domain protein
1510755	-7.71719	7.79381e-31	product_name=expressed protein
1346800	-7.71693	2.40754e-13	product_name=hypothetical protein
1373746	-7.71089	1.56865e-18	product_name=hypothetical protein
1470240	-7.70783	2.14506e-86	product_name=P-loop containing nucleoside triphosphate hydrolase protein
1382617	-7.7059	9.48319e-48	product_name=Carotenoid oxygenase
1492448	-7.70142	5.38404e-102	product_name=Tetratricopeptide repeat protein 36
1589784	-7.70065	4.64735e-13	product_name=hypothetical protein
1351494	-7.69949	2.69754e-13	product_name=Protein of unknown function%2C DUF606-domain containing protein
1585180	-7.6937	0	product_name=methylmalonate-semialdehyde dehydrogenase
1473944	-7.6836	9.69389e-10	product_name=hypothetical protein
1374693	-7.67963	5.47297e-13	product_name=major facilitator superfamily domain-containing protein
1516145	-7.6775	5.75683e-103	product_name=Multicopper oxidase-domain containing protein
1437536	-7.67645	2.71466e-50	product_name=major facilitator superfamily domain-containing protein
1431886	-7.67125	5.53209e-148	product_name=expressed protein
1531718	-7.6595	1.90242e-65	product_name=Dbl homology domain-containing protein
1373133	-7.65677	3.6482e-101	product_name=hypothetical protein
1573936	-7.65368	1.29727e-09	product_name=hypothetical protein
1433443	-7.65185	1.04737e-42	product_name=hypothetical protein
1443303	-7.64822	4.1708e-41	product_name=hypothetical protein
1575623	-7.64281	6.16333e-36	product_name=hypothetical protein
1597682	-7.64276	1.50596e-53	product_name=Aldehyde/histidinol dehydrogenase
1465101	-7.64241	1.01341e-46	product_name=hypothetical protein
1541263	-7.63794	1.79285e-40	product_name=chitin synthase
1410380	-7.62775	3.88045e-13	product_name=hypothetical protein
1361481	-7.62596	7.61786e-175	product_name=1%2C3-beta-glucan synthase component-domain-containing protein
1475875	-7.62478	6.35047e-47	product_name=Na+ dependent nucleoside transporter C-terminus-domain containing protein
1323195	-7.62298	6.55408e-12	product_name=hypothetical protein
1451517	-7.62248	5.78149e-55	product_name=Bestrophin%2C RFP-TM%2C chloride channel-domain containing protein
1380211	-7.61915	6.27883e-10	product_name=hypothetical protein
1508554	-7.59695	1.19259e-17	product_name=Domain of unknown function (DUF4203)-domain containing protein
1446167	-7.59595	5.39937e-13	product_name=hypothetical protein
1367199	-7.58524	3.25305e-51	product_name=Regulator of transcription similar to AbaA|TEA/ATTS domain family-domain containing protein
1600144	-7.58305	2.28162e-34	product_name=hypothetical protein
1590999	-7.58047	1.46916e-28	product_name=hypothetical protein
1533253	-7.57625	3.20949e-98	product_name=Protein kinase-like domain-containing protein
1516586	-7.57282	6.87161e-48	product_name=hypothetical protein
1031119	-7.56918	1.04171e-21	product_name=expressed protein
1531968	-7.56046	1.73997e-18	product_name=hypothetical protein
1490318	-7.55967	1.41618e-18	product_name=hypothetical protein
1508382	-7.55428	2.76194e-18	product_name=hypothetical protein
1546810	-7.55339	1.82627e-08	product_name=hypothetical protein
1519586	-7.54968	3.25656e-142	product_name=hypothetical protein
1495925	-7.54209	1.21269e-34	product_name=hypothetical protein
1480199	-7.53311	2.91276e-29	product_name=VID27 cytoplasmic protein-domain-containing protein KAF1802468.1 VID27 cytoplasmic protein-domain-containing protein
1453992	-7.52907	9.48117e-184	product_name=acyl-CoA synthetase
1466161	-7.52611	7.38029e-106	product_name=t-SNARE
1164253	-7.52515	1.81621e-23	product_name=Major facilitator superfamily domain-containing protein
1510534	-7.52217	7.98671e-183	product_name=general substrate transporter
1503662	-7.50924	0	product_name=E1 component|E1 component (2-oxoglutarate dehydrogenase E1 component hypothetical protein [EC:1.2.4.2])
1352516	-7.49935	9.21424e-30	product_name=Alpha/Beta hydrolase fold
1152884	-7.49623	6.68956e-38	product_name=hypothetical protein
1544470	-7.48009	7.26264e-34	product_name=hypothetical protein
1463175	-7.47798	1.7117e-199	product_name=hypothetical protein
1462629	-7.47213	1.33424e-49	product_name=Peptidase S8/S53 domain-containing protein
1443180	-7.46101	1.91642e-246	product_name=expressed protein
1364327	-7.45942	9.70189e-63	product_name=chitin synthase
1447080	-7.45678	1.03003e-22	product_name=hypothetical protein
1027592	-7.45108	7.06619e-37	product_name=hypothetical protein
1565898	-7.45016	2.64643e-09	product_name=hypothetical protein
1476013	-7.44626	1.59592e-61	product_name=hypothetical protein
1587822	-7.44333	1.86741e-160	product_name=Reticulon-domain containing protein
1361940	-7.4405	3.21774e-12	product_name=hypothetical protein
1485973	-7.43584	1.11204e-38	product_name=hypothetical protein
1564306	-7.4256	6.71446e-48	product_name=hypothetical protein
1373582	-7.42248	8.2668e-16	product_name=Acyl-CoA dehydrogenase/oxidase%2C N-terminal and middle domain-containing protein
1447366	-7.41186	2.35245e-12	product_name=hypothetical protein
1538073	-7.41121	2.71377e-17	product_name=hypothetical protein
1361616	-7.4022	1.77675e-85	product_name=chitosanase
1433203	-7.40173	2.56766e-12	product_name=hypothetical protein
1446176	-7.39982	1.01281e-134	product_name=Ribonucleotide reductase%2C barrel domain-domain containing protein
1597150	-7.38738	4.80183e-106	product_name=GDP-mannose transporter
1570456	-7.38482	1.50017e-43	product_name=chitin synthase
1541142	-7.38304	9.45651e-67	product_name=Uncharacterized conserved protein H4 (DUF2046)-domain containing protein
1576314	-7.37865	6.35903e-13	product_name=hypothetical protein
1066979	-7.37766	8.43386e-09	product_name=hypothetical protein
1443092	-7.36648	7.81891e-10	product_name=hypothetical protein
1551600	-7.36447	2.26156e-17	product_name=hypothetical protein
1494058	-7.35831	4.65629e-77	product_name=expressed protein
1369983	-7.35802	2.0919e-09	product_name=hypothetical protein
1543918	-7.35573	3.40074e-33	product_name=fungal protein
1475458	-7.34912	2.37585e-32	product_name=hypothetical protein
1458113	-7.34562	2.5356e-28	product_name=RlpA-like double-psi beta-barrel-protein domain-containing protein-containing protein
1545645	-7.34074	5.48121e-153	product_name=aconitate hydratase
1161390	-7.3371	2.31475e-09	product_name=hypothetical protein
1454471	-7.33613	2.77288e-17	product_name=hypothetical protein
1525855	-7.33519	7.19629e-17	product_name=major facilitator superfamily domain-containing protein
1517478	-7.33124	4.54723e-73	product_name=carbohydrate-binding module family 13 protein OAD03138.1 carbohydrate-binding module family 13 protein
1395579	-7.32609	9.28862e-78	product_name=hypothetical protein
1522288	-7.3254	5.18646e-16	product_name=GPR1/FUN34/yaaH family-domain containing protein
1367627	-7.32466	2.64983e-17	product_name=Cytochrome P450 CYP5313|cytochrome P450 CYP5313 OAD06230.1 cytochrome P450 CYP5313
1478382	-7.31964	1.97211e-31	product_name=hypothetical protein
1482149	-7.31863	6.12483e-140	product_name=hypothetical protein
1365382	-7.31786	9.15198e-109	product_name=hypothetical protein
1445399	-7.31633	2.72459e-16	product_name=hypothetical protein
1567658	-7.30853	1.5253e-08	product_name=hypothetical protein
1592988	-7.29782	2.13753e-51	product_name=Protein of unknown function (DUF1688)-domain containing protein
1465957	-7.29036	8.52575e-108	product_name=hypothetical protein
1565022	-7.28634	3.26001e-09	product_name=hypothetical protein
1522434	-7.28524	1.2866e-86	product_name=hypothetical protein
1511327	-7.27616	3.36484e-38	product_name=hypothetical protein
1600157	-7.27216	1.19842e-08	product_name=hypothetical protein
1522552	-7.26461	6.78023e-36	product_name=Amino acid/polyamine transporter I
1475453	-7.2596	4.39817e-27	product_name=hypothetical protein
1445338	-7.25674	1.33606e-08	product_name=hypothetical protein
1521250	-7.25052	0	product_name=Carbohydrate-Binding Module Family 21 / Glycoside Hydrolase Family 15 protein|glycoside hydrolase
1494621	-7.24129	8.5239e-173	product_name=thiamine diphosphate-binding protein
1416601	-7.23989	2.27905e-08	product_name=expressed protein
1597002	-7.23639	5.81673e-56	product_name=2-oxoacid dehydrogenases acyltransferase (catalytic domain)-domain containing protein
1519911	-7.22956	1.08509e-18	product_name=glycosyltransferase family 4 protein
1475433	-7.22898	1.17481e-16	product_name=hypothetical protein
1393736	-7.22717	2.53768e-41	product_name=bacterial low temperature requirement A protein-domain-containing protein
1517042	-7.22046	1.23823e-109	product_name=hypothetical protein
1364817	-7.21604	7.91945e-36	product_name=hypothetical protein
1364318	-7.21267	3.04055e-31	product_name=hypothetical protein
1527272	-7.2117	2.28043e-16	product_name=hypothetical protein
1444358	-7.20687	1.25148e-14	product_name=hypothetical protein
1595569	-7.20234	2.51499e-08	product_name=hypothetical protein
1369869	-7.19252	2.77441e-15	product_name=hypothetical protein
1522657	-7.18905	0	product_name=RmlC-like cupin domain-containing protein
1522967	-7.17772	3.13031e-205	product_name=Glycoside hydrolase
1588946	-7.1761	4.27019e-124	product_name=chitin synthase-domain-containing protein
1494336	-7.17224	1.11994e-67	product_name=hypothetical protein
1574711	-7.16919	1.50426e-11	product_name=hypothetical protein
1499548	-7.16743	2.0217e-08	product_name=G protein alpha subunit|G protein alpha subunit OAD05524.1 G protein alpha subunit
1486844	-7.16609	7.76661e-165	product_name=NADP-dependent oxidoreductase domain-containing protein
1557153	-7.16441	2.13518e-40	product_name=kinase-like domain-containing protein
1458592	-7.16303	5.56614e-23	product_name=hypothetical protein
1514380	-7.16008	0	product_name=Tryptophan synthase beta subunit-like PLP-dependent enzyme
1368652	-7.15636	2.59824e-20	product_name=hypothetical protein
1387697	-7.15552	1.47597e-11	product_name=hypothetical protein
1500568	-7.15546	1.3082e-11	product_name=expressed protein
1516973	-7.15269	3.4463e-143	product_name=Clathrin light chain
1511905	-7.14883	3.38692e-128	product_name=hypothetical protein
1529727	-7.14776	8.25513e-59	product_name=hypothetical protein
1555909	-7.14202	1.92791e-121	product_name=hypothetical protein
1601518	-7.14003	3.90448e-45	product_name=DIL domain-containing protein
1479971	-7.13825	2.50278e-20	product_name=hypothetical protein
1480970	-7.13434	4.61156e-94	product_name=amine oxidase
1381556	-7.1304	5.48372e-19	product_name=apses-type HTH transcription regulator
1444115	-7.12925	9.96297e-07	product_name=hypothetical protein
1347388	-7.12549	7.37019e-16	product_name=hypothetical protein
1348890	-7.12511	2.52585e-44	product_name=Amino acid permease/ SLC12A domain-containing protein
1376907	-7.12426	1.10773e-177	product_name=hypothetical protein
1586527	-7.11944	3.45522e-11	product_name=expressed protein
1376699	-7.11879	1.32054e-29	product_name=hypothetical protein
1370040	-7.11377	9.20416e-53	product_name=Ankyrin repeat-containing domain protein
1594914	-7.11295	7.06291e-92	product_name=hypothetical protein
1363019	-7.10391	2.75345e-228	product_name=hypothetical protein
1545638	-7.10241	1.19674e-226	product_name=hypothetical protein
1376571	-7.09837	1.53934e-47	product_name=glycoside hydrolase|Glycoside Hydrolase Family 9 protein
1521867	-7.09152	1.11022e-34	product_name=hypothetical protein
1364809	-7.09143	4.48576e-25	product_name=hypothetical protein
1563161	-7.08863	2.16701e-46	product_name=hypothetical protein
1601068	-7.08386	1.71665e-62	product_name=hypothetical protein
1543132	-7.08196	9.47849e-18	product_name=hypothetical protein
1456274	-7.08056	0	product_name=alkaline-phosphatase-like protein
1010138	-7.07257	1.21302e-08	product_name=HSP20-like chaperone
1528290	-7.07129	9.46653e-292	product_name=hypothetical protein
1493422	-7.0608	1.18565e-56	product_name=hypothetical protein
1321074	-7.05321	2.10871e-65	product_name=Helix-loop-helix DNA-binding domain-containing transcription factor|hypothetical protein
1324013	-7.05183	3.20306e-11	product_name=hypothetical protein
1524773	-7.04796	6.45565e-21	product_name=hypothetical protein
1477472	-7.04424	1.25071e-07	product_name=hypothetical protein
1354087	-7.04408	3.98679e-34	product_name=hypothetical protein
1595981	-7.04282	1.06806e-21	product_name=hypothetical protein
1582869	-7.04267	1.66097e-119	product_name=rab-GTPase-TBC domain-containing protein
1597303	-7.03543	2.01976e-24	product_name=General substrate transporter
1444527	-7.03517	1.22472e-20	product_name=hypothetical protein
1352372	-7.03478	8.26214e-110	product_name=Carboxyl transferase
1513802	-7.03151	1.96453e-45	product_name=peptidase S8/S53 domain-containing protein
1379347	-7.0292	1.82686e-39	product_name=hypothetical protein
1346612	-7.02495	4.36445e-30	product_name=major facilitator superfamily domain-containing protein
1596560	-7.01966	0	product_name=chondroitin AC/alginate lyase
1526027	-7.0193	1.3052e-37	product_name=hypothetical protein
1582312	-7.01118	1.37537e-10	product_name=hypothetical protein
1465485	-7.00971	4.6111e-97	product_name=hypothetical protein
1355184	-7.00832	2.04748e-206	product_name=POT family-domain-containing protein
1591260	-6.99884	3.68049e-21	product_name=BTB/POZ protein
1468922	-6.99356	8.97106e-20	product_name=hypothetical protein
1383457	-6.99272	2.21385e-48	product_name=hypothetical protein
1500561	-6.98139	6.40429e-162	product_name=Interferon-inducible GTPase (IIGP)-domain containing protein
1451753	-6.97808	1.11617e-10	product_name=Homeodomain-like DNA binding domain-containing transcription factor
1520598	-6.97671	0	product_name=H+-transporting ATPase
1514484	-6.96686	2.73429e-42	product_name=hypothetical protein
1343272	-6.95562	6.22932e-137	product_name=hypothetical protein
1349946	-6.95091	4.93912e-37	product_name=Ankyrin repeat-containing domain protein
1359020	-6.94901	5.64881e-29	product_name=L-lactate permease
1038382	-6.94276	1.30512e-15	product_name=hypothetical protein
1479187	-6.93865	4.1596e-206	product_name=hypothetical protein
1486451	-6.93805	3.81389e-75	product_name=Haemolysin-III related-domain containing protein
1561409	-6.92579	2.06102e-54	product_name=hypothetical protein
1450974	-6.92548	7.28512e-20	product_name=transcription factor Opi1-domain-containing protein
1151236	-6.91506	1.641e-83	product_name=hypothetical protein
1347812	-6.91381	2.04418e-84	product_name=hypothetical protein
1467744	-6.91351	1.90122e-11	product_name=hypothetical protein
1520455	-6.91058	4.32545e-140	product_name=Ras family-domain containing protein
1565943	-6.91035	1.17668e-157	product_name=hypothetical protein
1569885	-6.90928	1.95627e-15	product_name=Rho GTPase activation protein
1479643	-6.90858	8.27618e-134	product_name=hypothetical protein
1452029	-6.90821	1.67889e-45	product_name=hypothetical protein
1365458	-6.90753	3.62785e-32	product_name=signal transducer
1465376	-6.90494	0	product_name=Domain of unkown function (DUF1775)-domain containing protein
1540464	-6.87915	1.36211e-247	product_name=phosphatidylserine decarboxylase-domain-containing protein
1523693	-6.8787	0	product_name=Acyl-CoA N-acyltransferase
1336474	-6.87274	1.17387e-19	product_name=cyclin
1574510	-6.86717	1.62619e-07	product_name=Homeodomain-like DNA binding domain-containing transcription factor
1481595	-6.85707	4.16068e-286	product_name=Glycoside Hydrolase Family 37 protein|Trehalase-domain containing protein
1511596	-6.8519	2.33883e-23	product_name=hypothetical protein
1388400	-6.84778	3.21754e-32	product_name=hypothetical protein
1596453	-6.84435	6.89872e-15	product_name=General substrate transporter
1471544	-6.83811	2.46528e-193	product_name=carbohydrate-binding module family 50 protein
1395884	-6.83767	7.13684e-39	product_name=Domain of unknown function (DUF4451)-domain containing protein
1459204	-6.83621	6.01462e-41	product_name=multicopper oxidase
1509200	-6.83476	5.26039e-256	product_name=hypothetical protein
1596900	-6.82973	1.15069e-244	product_name=hypothetical protein
1447730	-6.82398	3.20098e-27	product_name=PMCA-type calcium-translocating P-type ATPase
1473180	-6.82337	4.26521e-44	product_name=Peptidase S28
1582447	-6.8141	4.15335e-56	product_name=glycoside hydrolase family 20 protein
1534907	-6.814	4.22366e-48	product_name=hypothetical protein
1374460	-6.81358	0	product_name=plasma-membrane proton-e
1536104	-6.81032	1.66639e-10	product_name=magnesium transporter
1523808	-6.80862	3.51874e-119	product_name=hypothetical protein
1374151	-6.80837	1.94277e-55	product_name=hypothetical protein
1447868	-6.80771	1.05875e-248	product_name=hypothetical protein
1553228	-6.8077	8.96332e-163	product_name=hypothetical protein
1391444	-6.80499	2.60734e-32	product_name=Zn(2)-C6 fungal-specific transcription factor|Zn(2)-C6 fungal-specific transcription factor OAC99718.1 Zn(2)-C6 fungal-specific transcription factor
1555557	-6.80489	9.23602e-44	product_name=aspartic peptidase domain-containing protein
1586212	-6.80004	2.11246e-190	product_name=hypothetical protein
1515552	-6.79784	8.98373e-51	product_name=hypothetical protein
1441725	-6.79782	2.9448e-07	product_name=hypothetical protein
1480877	-6.78899	7.91044e-48	product_name=hypothetical protein
1590251	-6.78196	4.77851e-70	product_name=Alpha/Beta hydrolase fold
1535297	-6.78005	1.34435e-64	product_name=hypothetical protein
1330948	-6.77897	1.35011e-30	product_name=transcription regulator HTH%2C apses-type DNA-binding domain-containing protein
1472724	-6.77732	1.23621e-70	product_name=hypothetical protein
1480596	-6.7744	0	product_name=hypothetical protein
1558686	-6.76845	9.43992e-15	product_name=hypothetical protein
1601148	-6.76826	8.54793e-43	product_name=Amino acid/polyamine transporter I
1378586	-6.76711	2.31744e-210	product_name=hypothetical protein
1468748	-6.76626	1.0216e-45	product_name=hypothetical protein
1516997	-6.76483	7.19511e-110	product_name=regulator of G protein signaling domain-containing protein
1521990	-6.76194	0	product_name=FAD binding domain-domain containing protein
1487804	-6.76167	2.76617e-207	product_name=Alkaline-phosphatase-like%2C core domain-containing protein
1450169	-6.75958	2.02236e-18	product_name=hypothetical protein
1464015	-6.75247	7.85836e-125	product_name=hypothetical protein
1383626	-6.74918	5.8359e-35	product_name=hypothetical protein
1342066	-6.74627	1.07418e-07	product_name=hypothetical protein
1074021	-6.74277	1.03465e-30	product_name=OPT oligopeptide transporter protein-domain containing protein
1383835	-6.74206	7.11125e-122	product_name=hypothetical protein
1516911	-6.73859	5.20903e-29	product_name=expressed protein
1576104	-6.73837	1.10405e-07	product_name=hypothetical protein
1453269	-6.73798	4.05998e-09	product_name=general substrate transporter
1375469	-6.72753	2.9104e-27	product_name=hypothetical protein
1601554	-6.7171	1.74063e-18	product_name=Domain of unknown function DUF221-domain containing protein
1386462	-6.70893	9.97533e-214	product_name=hypothetical protein
1567789	-6.70471	4.03819e-07	product_name=hypothetical protein
1321356	-6.70402	8.76127e-08	product_name=hypothetical protein
1455797	-6.70086	4.82686e-62	product_name=P-loop containing nucleoside triphosphate hydrolase protein
1527620	-6.69553	1.19637e-296	product_name=Tubulin/FtsZ%2C GTPase domain-containing protein
1595331	-6.69292	9.91995e-35	product_name=hypothetical protein
1360356	-6.69189	1.71943e-49	product_name=S-adenosyl-L-methionine-dependent methyltransferase
1032760	-6.6895	8.36331e-37	product_name=expressed protein
1386241	-6.68647	4.33691e-55	product_name=Thiolase-like protein
1451638	-6.68197	2.53163e-18	product_name=hypothetical protein
1440856	-6.67795	5.1105e-07	product_name=Basic-leucine zipper (bZIP) transcription factor|basic-leucine zipper transcription factor
1484996	-6.67704	1.45819e-16	product_name=hypothetical protein
1386950	-6.67696	2.53594e-10	product_name=Retinoic acid induced 16-like protein-domain containing protein
1014724	-6.67292	1.7148e-31	product_name=Basic-leucine zipper (bZIP) transcription factor|basic-leucine zipper transcription factor
1571274	-6.66592	1.2185e-09	product_name=Serine dehydratase alpha chain-domain containing protein
1164248	-6.66482	1.00185e-82	product_name=vacuolar serine protease Isp6
1366194	-6.66169	2.7441e-31	product_name=hypothetical protein
1346223	-6.66039	1.90874e-66	product_name=Acyltransferase ChoActase/COT/CPT
1324267	-6.65945	6.72894e-10	product_name=Regulator of development and secondary metabolism of the velvet family. Similar to VosA|Velvet factor-domain containing protein
1409690	-6.65858	1.1317e-07	product_name=hypothetical protein
1474933	-6.65309	6.39987e-10	product_name=hypothetical protein
1325012	-6.65241	4.88986e-68	product_name=hypothetical protein
1349367	-6.64979	5.33363e-188	product_name=phospholipid-transporting ATPase
1357279	-6.64933	2.89809e-26	product_name=Cytidine deaminase-like protein
1518839	-6.64367	2.41617e-80	product_name=hypothetical protein
1353435	-6.64232	1.41328e-53	product_name=Bacterial low temperature requirement A protein (LtrA)-domain containing protein
1501922	-6.64011	2.10172e-200	product_name=hypothetical protein
1497317	-6.63573	1.55607e-09	product_name=hypothetical protein
1537602	-6.63419	3.85161e-178	product_name=chitin synthase
1598074	-6.63018	4.83687e-71	product_name=helix-loop-helix DNA-binding domain-containing transcription factor
1568243	-6.62979	7.22888e-07	product_name=hypothetical protein
1503257	-6.62911	2.56991e-21	product_name=RGS domain-containing protein
1511776	-6.61472	4.98139e-73	product_name=Fork head domain-domain containing protein
1601144	-6.61201	5.44795e-62	product_name=HotDog domain-containing protein
1470515	-6.60848	5.96554e-235	product_name=Major facilitator superfamily domain-containing protein
1560177	-6.60609	1.13528e-06	product_name=hypothetical protein
1561442	-6.60407	1.11924e-13	product_name=glycoside hydrolase family 9 protein
1390810	-6.59871	1.74568e-10	product_name=P-loop containing nucleoside triphosphate hydrolase protein
1538143	-6.59794	6.84431e-262	product_name=hypothetical protein
1593451	-6.58975	1.30163e-07	product_name=enoylCoA hydratase/isomerase
1601212	-6.58753	1.41313e-31	product_name=hypothetical protein
1557738	-6.58719	1.11063e-69	product_name=hypothetical protein
1513646	-6.58202	0	product_name=expressed protein
1392195	-6.57587	3.92052e-50	product_name=hypothetical protein
1536357	-6.57346	6.4793e-20	product_name=HotDog domain-containing protein
1448239	-6.57078	2.77772e-96	product_name=SGNH hydrolase-type esterase domain-containing protein
1586127	-6.56605	6.95223e-18	product_name=hypothetical protein
1517004	-6.56469	6.73506e-120	product_name=glycoside hydrolase family 20 protein
1534220	-6.56306	1.26048e-16	product_name=hypothetical protein
1485755	-6.56286	1.16731e-36	product_name=major facilitator superfamily domain-containing protein
1599803	-6.55771	2.45204e-49	product_name=Sodium:dicarboxylate symporter family-domain containing protein
1583309	-6.55758	1.26873e-37	product_name=General substrate transporter
1390474	-6.55658	1.7144e-250	product_name=cytochrome P450
1565158	-6.55437	5.19758e-88	product_name=CDC50/LEM3 family
1370097	-6.55317	2.86435e-228	product_name=Helix-loop-helix DNA-binding domain-containing transcription factor|helix-loop-helix DNA-binding domain-containing transcription factor OAD07066.1 helix-loop-helix DNA-binding domain-containing transcription factor
1383935	-6.55014	4.89732e-33	product_name=hypothetical protein
1365292	-6.54788	9.95207e-18	product_name=p53-like transcription factor
1571983	-6.54575	1.33435e-06	product_name=hypothetical protein
1584744	-6.53598	3.99177e-44	product_name=hypothetical protein
1378888	-6.53132	1.75724e-171	product_name=hypothetical protein
1583157	-6.52808	6.01092e-17	product_name=hypothetical protein
1476110	-6.52695	6.22967e-60	product_name=ClpP/crotonase-like domain-containing protein
1001405	-6.52604	2.57473e-12	product_name=hypothetical protein
1366537	-6.52577	3.1552e-17	product_name=S-adenosyl-L-methionine-dependent methyltransferase
1542782	-6.52446	3.48274e-176	product_name=D-xylose reductase
1469826	-6.52319	4.97827e-91	product_name=hypothetical protein
1360320	-6.52217	3.76432e-53	product_name=CDP-alcohol phosphatidyltransferase-domain-containing protein
1490939	-6.51517	6.51372e-299	product_name=rab GTPase activator
1465504	-6.51484	2.90086e-10	product_name=camp-dependent protein kinase
1490437	-6.51479	1.541e-21	product_name=hypothetical protein
1407491	-6.51373	1.39326e-09	product_name=CotH protein-domain containing protein
1598347	-6.51246	6.83494e-65	product_name=hypothetical protein
1563382	-6.51151	2.76332e-77	product_name=hypothetical protein
1466174	-6.50809	1.97573e-206	product_name=pyruvate kinase
1539712	-6.50668	2.49613e-109	product_name=P-loop containing nucleoside triphosphate hydrolase protein
1360452	-6.50363	6.6401e-17	product_name=hypothetical protein
1486058	-6.50328	3.32745e-86	product_name=hypothetical protein
1538871	-6.50107	6.39979e-13	product_name=Small GTPase superfamily
1378989	-6.49889	2.05832e-22	product_name=alpha-L-fucosidase-domain-containing protein
1377042	-6.49794	2.49585e-28	product_name=hypothetical protein
1589759	-6.49631	1.46142e-124	product_name=Septin-domain-containing protein
1543456	-6.4826	8.6317e-33	product_name=hypothetical protein
1390052	-6.48086	2.27807e-17	product_name=hypothetical protein
1463020	-6.46358	7.98143e-75	product_name=hypothetical protein
1535741	-6.46339	1.1887e-281	product_name=thiamine diphosphate-binding protein
1502506	-6.45746	3.09195e-99	product_name=hypothetical protein
1364222	-6.45746	2.10479e-06	product_name=hypothetical protein
1499749	-6.44921	6.19161e-176	product_name=hypothetical protein
1583205	-6.44804	3.25152e-93	product_name=Domain of unknown function (DUF3472)-domain containing protein
1035056	-6.44784	5.64994e-13	product_name=hypothetical protein
1391513	-6.44765	2.10726e-165	product_name=hypothetical protein
1475730	-6.44117	1.0169e-59	product_name=hypothetical protein
1528036	-6.44009	2.05626e-57	product_name=Cortical protein marker for cell polarity-domain containing protein
1372492	-6.43972	9.67714e-13	product_name=VTC domain-containing protein
1395610	-6.43944	7.23305e-64	product_name=hypothetical protein
1345938	-6.43846	2.66375e-09	product_name=hypothetical protein
1375147	-6.43731	2.30184e-87	product_name=hypothetical protein
1566321	-6.42993	1.52995e-12	product_name=Protein kinase-like domain-containing protein
1335409	-6.42987	9.66866e-07	product_name=ELO family
1493662	-6.42211	3.23711e-16	product_name=hypothetical protein
1589336	-6.42171	9.00211e-34	product_name=hypothetical protein
1516010	-6.41938	1.1978e-92	product_name=hypothetical protein
1477596	-6.41935	5.03394e-54	product_name=P-loop containing nucleoside triphosphate hydrolase protein
1595237	-6.41447	8.6781e-175	product_name=sulfate transporter family-domain-containing protein
1532410	-6.40863	1.07078e-08	product_name=chitinase 1
1439813	-6.40791	3.41425e-06	product_name=hypothetical protein
1127229	-6.40773	4.47814e-12	product_name=cytochrome P450 CYP5203
1460646	-6.40762	6.84352e-66	product_name=p53-like transcription factor
1570238	-6.40486	1.00255e-05	product_name=expressed protein
1347686	-6.40213	7.92414e-28	product_name=kinase-like protein
1474423	-6.39532	9.36473e-32	product_name=Protein of unknown function (DUF1394)-domain containing protein
1569973	-6.39509	4.02872e-09	product_name=Major facilitator superfamily domain-containing protein
1379688	-6.38637	1.39249e-37	product_name=hypothetical protein
1504516	-6.38556	1.40773e-124	product_name=hypothetical protein
1494345	-6.38526	1.0478e-37	product_name=hypothetical protein
1485660	-6.38493	1.71448e-52	product_name=hypothetical protein
1601755	-6.38082	6.83778e-48	product_name=glycoside hydrolase superfamily
1587213	-6.37973	1.37341e-151	product_name=hypothetical protein
1451834	-6.37951	3.33615e-150	product_name=hypothetical protein
1351260	-6.36836	2.81546e-06	product_name=hypothetical protein
1537144	-6.35481	1.79388e-92	product_name=C2H2-type Zinc finger transcription factor|C2H2-type zinc finger transcription factor OAD05699.1 C2H2-type zinc finger transcription factor
1498571	-6.33518	3.78021e-40	product_name=hypothetical protein
1515079	-6.3317	2.75828e-98	product_name=COPI associated protein-domain containing protein
1491454	-6.33166	8.82059e-07	product_name=expressed protein
1593550	-6.33129	5.36867e-06	product_name=C2H2-type zinc finger transcription factor
1377565	-6.33013	4.71017e-69	product_name=hypothetical protein
1528472	-6.32573	7.54915e-116	product_name=Triose-phosphate Transporter family-domain containing protein
1573040	-6.32297	3.9875e-06	product_name=hypothetical protein
1362921	-6.32017	2.92487e-06	product_name=Major facilitator superfamily domain-containing protein
1596581	-6.30994	9.29522e-07	product_name=Aspartic peptidase domain-containing protein
1446754	-6.30914	1.53512e-06	product_name=hypothetical protein
1461448	-6.29948	7.86513e-97	product_name=Gtr1/RagA G protein conserved region-domain containing protein
1515977	-6.2959	7.94709e-47	product_name=Rgp1-domain-containing protein
1509213	-6.28894	2.26833e-98	product_name=hypothetical protein
1469537	-6.28811	1.01882e-05	product_name=hypothetical protein
1569097	-6.28662	1.03194e-08	product_name=Ankyrin repeat-containing domain protein
1366421	-6.28374	8.08724e-209	product_name=hypothetical protein
1505973	-6.28356	1.34566e-46	product_name=mate-domain-containing protein
1481442	-6.28075	1.26315e-183	product_name=transmembrane amino acid transporter protein-domain-containing protein
1518580	-6.28065	4.52156e-56	product_name=Alpha/Beta hydrolase fold
1326131	-6.27804	1.62085e-32	product_name=hypothetical protein
1522550	-6.27382	1.35445e-42	product_name=ADP-ribosylation factor-like protein 8B
1381900	-6.27146	1.07604e-15	product_name=hypothetical protein
1551405	-6.26364	0	product_name=hypothetical protein
1376780	-6.25838	2.09221e-210	product_name=hypothetical protein
1599012	-6.25692	1.35229e-05	product_name=Major facilitator superfamily domain-containing protein
1513990	-6.25556	0	product_name=Pyridoxal phosphate-dependent transferase
1447387	-6.25257	2.18314e-21	product_name=Periplasmic binding protein-like I
1453776	-6.25184	5.58124e-38	product_name=hypothetical protein
1528161	-6.24483	3.25434e-305	product_name=hypothetical protein
1509286	-6.24452	1.04659e-164	product_name=Helix-loop-helix DNA-binding domain-containing transcription factor|helix-loop-helix DNA-binding domain-containing transcription factor OAD08311.1 helix-loop-helix DNA-binding domain-containing transcription factor
1587850	-6.23505	3.98868e-55	product_name=P-loop containing nucleoside triphosphate hydrolase protein
1528712	-6.22185	6.4338e-52	product_name=acyl-CoA dehydrogenase/oxidase
1466162	-6.21402	2.5335e-62	product_name=hypothetical protein
1350209	-6.21166	9.71654e-23	product_name=hypothetical protein
1517508	-6.19532	2.44947e-105	product_name=hypothetical protein
1584681	-6.1948	1.33231e-06	product_name=expressed protein
1350320	-6.19325	2.15055e-75	product_name=beta 1%2C3 glucan synthase
1532343	-6.19015	3.74958e-132	product_name=hypothetical protein
1564058	-6.17913	8.29222e-113	product_name=FAD-linked oxidoreductase-like protein
1522160	-6.17863	1.38613e-86	product_name=hypothetical protein
1177142	-6.17404	1.1041e-19	product_name=EXS family-domain containing protein
1438826	-6.1728	9.00586e-06	product_name=expressed protein
1550246	-6.1712	3.67028e-57	product_name=hypothetical protein
1598270	-6.17011	7.82712e-71	product_name=fatty acid elongase
1544317	-6.16853	1.19206e-119	product_name=2-dehydropantoate 2-reductase
1392327	-6.16652	2.67496e-49	product_name=hypothetical protein
1489737	-6.15426	5.42434e-158	product_name=phospholipid-transporting ATPase
1499901	-6.14728	6.80554e-05	product_name=expressed protein
1477568	-6.1423	9.68743e-32	product_name=OPT oligopeptide transporter protein-domain containing protein
1015056	-6.14165	1.19329e-09	product_name=hypothetical protein
1576042	-6.136	1.04618e-14	product_name=P-loop containing nucleoside triphosphate hydrolase protein
1361789	-6.13572	2.22463e-19	product_name=P-loop containing nucleoside triphosphate hydrolase protein
1489916	-6.13542	2.47159e-232	product_name=P-loop containing nucleoside triphosphate hydrolase protein
1587224	-6.13437	7.57782e-136	product_name=hypothetical protein
1531873	-6.13416	8.43098e-14	product_name=cytochrome P450
1547821	-6.13177	3.21648e-15	product_name=C2 domain-containing protein
1595586	-6.13145	3.61641e-28	product_name=kinase-like domain-containing protein
1390506	-6.12785	5.08996e-25	product_name=hypothetical protein
1395063	-6.12423	4.63273e-153	product_name=benzoquinone reductase
1499570	-6.12306	3.42652e-202	product_name=Protein of unknown function (DUF3808)-domain containing protein
1464393	-6.11769	4.5898e-115	product_name=Major facilitator superfamily domain-containing protein
1386854	-6.11612	5.31057e-43	product_name=glycoside hydrolase|Glycoside Hydrolase Family 18 protein
1592244	-6.11127	2.26501e-170	product_name=mannosyltransferase putative-domain-containing protein
1377346	-6.10528	1.76211e-54	product_name=hypothetical protein
1407791	-6.10418	4.49227e-06	product_name=Krueppel-like factor 15
1597095	-6.10282	4.0932e-06	product_name=glycoside hydrolase|Glycoside Hydrolase Family 18 protein
1376077	-6.09967	1.12575e-123	product_name=chitin deacetylase
1525843	-6.09941	1.19495e-98	product_name=hypothetical protein
1365109	-6.09625	4.9503e-08	product_name=hypothetical protein
1506753	-6.09574	2.67567e-99	product_name=Ubiquinol-cytochrome c reductase core subunit 10 QCR10|Ubiquinol-cytochrome-c reductase complex subunit (QCR10)-domain containing protein
1444133	-6.09153	4.17983e-219	product_name=hypothetical protein
1485878	-6.09126	4.61285e-236	product_name=hypothetical protein
1502130	-6.07934	1.04005e-218	product_name=Serine/threonine kinase hybrid HK
1594595	-6.07729	1.14268e-32	product_name=hypothetical protein
1450323	-6.07451	8.77298e-15	product_name=major facilitator superfamily domain-containing protein
1593246	-6.07262	2.61508e-08	product_name=Catalytic component of the RISC complex similar to Argonaute|Piwi domain-domain containing protein
1448244	-6.07002	4.52774e-08	product_name=Major facilitator superfamily domain-containing protein
1465199	-6.06324	0	product_name=Glutamate/Leucine/Phenylalanine/Valine dehydrogenase-domain-containing protein
1552877	-6.05696	2.95776e-261	product_name=kinesin heavy chain
1538061	-6.05221	1.83588e-44	product_name=HotDog domain-containing protein
1585777	-6.04767	1.88346e-11	product_name=hypothetical protein
1533187	-6.04491	9.13194e-218	product_name=glycosyl-transferase for dystroglycan-domain-containing protein
1454108	-6.03869	1.09505e-15	product_name=hypothetical protein
1523607	-6.03744	4.34042e-06	product_name=hypothetical protein
1447199	-6.03534	9.22324e-52	product_name=hypothetical protein
1489534	-6.03233	5.4362e-183	product_name=Phosphatidylethanolamine-binding protein PEBP
1579382	-6.03065	2.24422e-05	product_name=hypothetical protein
1592493	-6.03009	7.17348e-11	product_name=Basic-leucine zipper (bZIP) transcription factor|basic-leucine zipper transcription factor
1480012	-6.02463	2.73811e-44	product_name=hypothetical protein
1598512	-6.01079	1.9231e-179	product_name=hypothetical protein
1360444	-6.0102	1.41445e-76	product_name=hypothetical protein
1517516	-6.00397	3.5172e-142	product_name=hypothetical protein
1465656	-6.00381	3.80668e-172	product_name=Peptidase S8/S53 domain-containing protein
1361258	-5.99987	0	product_name=rab-GTPase-TBC domain-containing protein
1530244	-5.99143	1.02065e-21	product_name=hypothetical protein
1392278	-5.99079	3.24856e-28	product_name=hypothetical protein
1444803	-5.98895	3.22083e-24	product_name=C2H2-type zinc finger transcription factor
1387328	-5.98811	9.95468e-300	product_name=aldehyde dehydrogenase domain-containing protein
1361146	-5.98757	1.59827e-28	product_name=major facilitator superfamily domain-containing protein
1456923	-5.98502	6.16808e-66	product_name=cytochrome P450 CYP5203
1323035	-5.98425	5.75001e-17	product_name=Meiotic cell cortex C-terminal pleckstrin homology-domain containing protein
1379197	-5.98202	8.06158e-250	product_name=sorting nexin-3 GAN09461.1 sorting nexin-3
1394117	-5.98031	1.46055e-303	product_name=hypothetical protein
1570631	-5.97949	4.03769e-05	product_name=hypothetical protein
1445686	-5.97312	6.41361e-08	product_name=NADP-dependent oxidoreductase domain-containing protein
1458051	-5.96795	3.43206e-158	product_name=expressed protein
1557665	-5.96111	5.16899e-143	product_name=glycoside hydrolase family 81 protein
1592998	-5.96014	1.17035e-07	product_name=tfdA family oxidoreductase
1562549	-5.95872	6.32744e-06	product_name=Guanine nucleotide binding protein %28G-protein%29%2C alpha subunit
1445903	-5.95252	3.46989e-20	product_name=expressed protein
1569449	-5.95066	2.8899e-34	product_name=hypothetical protein
1445953	-5.94659	1.16711e-285	product_name=Thiolase%2C N-terminal domain-containing protein
1356380	-5.94302	6.37992e-200	product_name=hypothetical protein
1479095	-5.94021	3.07822e-122	product_name=NADH-ubiquinone reductase complex 1 MLRQ subunit-domain containing protein
1595680	-5.93907	2.92145e-17	product_name=purine permease protein
1504756	-5.93587	1.26345e-16	product_name=hypothetical protein
1540670	-5.93529	5.11867e-100	product_name=Armadillo-type fold
1575469	-5.9309	6.59272e-06	product_name=hypothetical protein
1495255	-5.92829	3.23531e-12	product_name=GPR1/FUN34/yaaH family-domain containing protein
1343381	-5.92658	8.07385e-75	product_name=Septin-domain containing protein
1340510	-5.9247	5.50612e-53	product_name=hypothetical protein
1500095	-5.92037	4.49391e-49	product_name=hypothetical protein
1348861	-5.91257	8.33991e-20	product_name=hypothetical protein
1490880	-5.90719	1.70846e-105	product_name=hypothetical protein
1372523	-5.90407	3.68306e-17	product_name=hypothetical protein
1535074	-5.89686	5.06282e-233	product_name=hypothetical protein
1353623	-5.89543	1.31308e-10	product_name=hypothetical protein
1534221	-5.89441	9.35386e-69	product_name=hypothetical protein
1344090	-5.89393	2.36359e-14	product_name=E2F/DP family winged-helix DNA-binding domain-containing protein
1562747	-5.89321	3.13075e-19	product_name=hypothetical protein
1367889	-5.89265	8.11452e-06	product_name=hypothetical protein
1322491	-5.89153	3.83517e-20	product_name=helix-loop-helix DNA-binding domain-containing transcription factor
1525053	-5.8907	7.79081e-110	product_name=hypothetical protein
1520285	-5.88531	8.76648e-91	product_name=hypothetical protein
1549130	-5.88381	5.71023e-265	product_name=hypothetical protein
1556474	-5.88294	8.86381e-78	product_name=hypothetical protein
1502171	-5.87181	9.59933e-21	product_name=hypothetical protein
1478208	-5.86839	1.55257e-53	product_name=hypothetical protein
1391565	-5.86586	1.23361e-07	product_name=hypothetical protein
1511898	-5.86105	9.58496e-16	product_name=expressed protein
1525127	-5.8537	0	product_name=heme peroxidase
1473004	-5.84666	3.34069e-29	product_name=hypothetical protein
1557646	-5.84095	2.29596e-187	product_name=hypothetical protein
1590432	-5.83969	1.90442e-17	product_name=GroES (chaperonin 10)-like protein
1515076	-5.83832	7.33035e-57	product_name=Armadillo-type fold
1599666	-5.83616	3.35933e-13	product_name=hypothetical protein
1499296	-5.82894	2.03377e-42	product_name=Metallo-dependent phosphatase-like protein
1456043	-5.8249	1.35065e-77	product_name=potassium:hydrogen antiporter protein
1580716	-5.81889	3.2193e-27	product_name=hypothetical protein
1446213	-5.81419	9.47356e-32	product_name=expressed protein
1092864	-5.81223	2.81169e-30	product_name=hypothetical protein
1071190	-5.80512	1.92995e-13	product_name=expressed protein
1578751	-5.80496	1.64974e-07	product_name=glycoside hydrolase family 18 protein
1555142	-5.80247	2.08258e-121	product_name=hypothetical protein
1018691	-5.79948	3.11461e-62	product_name=hypothetical protein
1582916	-5.79877	0.000123263	product_name=expressed protein
1586736	-5.79728	4.89238e-63	product_name=glycoside hydrolase|Glycoside Hydrolase Family 16 protein
1506464	-5.79336	0	product_name=helix-loop-helix DNA-binding domain-containing protein
1474507	-5.79287	9.05568e-75	product_name=CAP domain-containing protein
1493858	-5.79275	1.06952e-57	product_name=hypothetical protein
1532248	-5.78921	3.10217e-88	product_name=hypothetical protein
1322460	-5.78837	1.48455e-05	product_name=amino acid transporter
1352670	-5.78624	8.42314e-05	product_name=Homeodomain-like DNA binding domain-containing transcription factor
1485071	-5.78304	1.62244e-64	product_name=hypothetical protein
1368110	-5.77973	4.0922e-110	product_name=hypothetical protein
1546843	-5.77303	1.17792e-10	product_name=cytochrome P450
1589529	-5.77133	2.2679e-227	product_name=carbamoyl-phosphate synthase L chain%2C ATP binding domain-containing protein
1527832	-5.7674	1.89998e-78	product_name=hypothetical protein
1374048	-5.76439	2.11365e-09	product_name=amino acid permease-domain-containing protein
1477776	-5.75989	6.99767e-179	product_name=Cation efflux family-domain containing protein
1555901	-5.7564	6.17252e-16	product_name=hypothetical protein
1392894	-5.75339	1.23063e-31	product_name=G protein alpha subunit|G protein alpha subunit OAD06201.1 G protein alpha subunit
1483794	-5.75331	2.23341e-41	product_name=hypothetical protein
1436483	-5.75209	3.91512e-24	product_name=hypothetical protein
1394066	-5.75206	7.81137e-41	product_name=hypothetical protein
1487973	-5.75106	3.41268e-41	product_name=hypothetical protein
1552867	-5.74836	8.00099e-38	product_name=glycosyltransferase family 17 protein
1377098	-5.74712	7.677e-176	product_name=hypothetical protein
1488461	-5.74128	6.61232e-218	product_name=hypothetical protein
1489610	-5.73752	3.80579e-64	product_name=hypothetical protein
1393955	-5.73561	3.05512e-86	product_name=hypothetical protein
1518536	-5.73219	9.08587e-141	product_name=hypothetical protein
1528319	-5.73215	1.08534e-113	product_name=fungal-specific transcription factor domain-containing protein
1482501	-5.73214	8.23432e-68	product_name=hypothetical protein
1600512	-5.72931	8.06499e-15	product_name=glycoside hydrolase|Glycoside Hydrolase Family 3 protein
1529446	-5.7231	7.71573e-144	product_name=hypothetical protein
1394253	-5.71986	1.01385e-80	product_name=glycoside hydrolase
1543649	-5.7165	2.99295e-118	product_name=adaptin N terminal region-domain-containing protein
1496096	-5.71538	2.24896e-81	product_name=hypothetical protein
1522255	-5.71531	1.02535e-95	product_name=Mitochondrial branched-chain alpha-ketoacid dehydrogenase kinase-domain containing protein
1592666	-5.7145	2.80308e-07	product_name=hypothetical protein
1518086	-5.71341	0	product_name=expressed protein
1344172	-5.71132	8.26326e-05	product_name=hypothetical protein
1471017	-5.71029	1.32498e-238	product_name=hypothetical protein
1395154	-5.70915	4.79505e-17	product_name=glycosyltransferase|Glycosyltransferase Family 1 protein
1572602	-5.70708	1.48896e-05	product_name=Homeodomain-like DNA binding domain-containing transcription factor|hypothetical protein
1468982	-5.69925	3.98901e-80	product_name=ATP-dependent protease La
1467007	-5.69196	9.72351e-246	product_name=Helix-loop-helix DNA-binding domain-containing transcription factor|helix-loop-helix DNA-binding domain-containing transcription factor OAD01133.1 helix-loop-helix DNA-binding domain-containing transcription factor
1574310	-5.69006	0.000167337	product_name=ClpP/crotonase-like domain-containing protein
1386453	-5.68328	6.57555e-18	product_name=hypothetical protein
1586285	-5.68057	4.49303e-106	product_name=hypothetical protein
1489324	-5.6795	4.94117e-140	product_name=SBF-like CPA transporter family (DUF4137)-domain containing protein
1366113	-5.67649	1.07232e-256	product_name=Fork head domain-domain containing protein
1529552	-5.67071	8.11833e-103	product_name=hypothetical protein
1549423	-5.66677	4.14285e-159	product_name=hypothetical protein
1322266	-5.6656	3.13571e-05	product_name=C2H2-type Zinc finger transcription factor|C2H2-type zinc finger transcription factor OAD00980.1 C2H2-type zinc finger transcription factor
1558503	-5.65799	2.025e-05	product_name=hypothetical protein
1527608	-5.65752	9.7402e-97	product_name=glycoside hydrolase family 125 protein
1446575	-5.6572	1.19418e-64	product_name=expressed protein
1392018	-5.65576	9.55651e-22	product_name=hypothetical protein
1536446	-5.64932	6.4298e-66	product_name=hypothetical protein
1502475	-5.64361	0	product_name=hypothetical protein
1548303	-5.64021	0	product_name=GTP cyclohydrolase N terminal-domain-containing protein
1485652	-5.63908	1.16353e-177	product_name=Oxidative stress survival%2C Svf1-like protein
1438879	-5.63771	0.000128346	product_name=hypothetical protein
1453722	-5.63157	8.88924e-130	product_name=peptidase family M48-domain-containing protein
1557725	-5.6285	1.76578e-08	product_name=hypothetical protein
1475859	-5.62835	4.00845e-175	product_name=hypothetical protein
1452879	-5.62769	2.06711e-12	product_name=expressed protein
1591299	-5.6237	1.63863e-70	product_name=Zn(2)-C6 fungal-specific transcription factor|Zn(2)-C6 fungal-specific transcription factor OAD06800.1 Zn(2)-C6 fungal-specific transcription factor
1467693	-5.61786	1.09454e-57	product_name=Sodium/calcium exchanger protein-domain-containing protein
1389923	-5.61379	5.013e-79	product_name=hypothetical protein
1147477	-5.61006	2.30704e-05	product_name=hypothetical protein
1564778	-5.6066	7.05391e-16	product_name=2-oxoglutarate translocator
1574876	-5.59155	0.000171688	product_name=hypothetical protein
1463177	-5.59022	1.55087e-64	product_name=YhhN-like protein
1484175	-5.58893	1.16449e-156	product_name=Distantly related to plant expansins|RlpA-like double-psi beta-barrel-containing protein domain-containing protein
1374824	-5.5815	9.48182e-24	product_name=kinase-like domain-containing protein
1573597	-5.58011	2.52052e-09	product_name=hypothetical protein
1536235	-5.56875	1.2049e-15	product_name=hypothetical protein
1541836	-5.56874	2.06736e-27	product_name=Cytochrome P450 CYP5213|cytochrome P450 CYP5213 OAD06210.1 cytochrome P450 CYP5213
1538854	-5.56569	1.43413e-185	product_name=Transcription factor E2F/dimerisation partner (TDP)|transcription factor E2F/dimerization partner OAD05885.1 transcription factor E2F/dimerization partner
1545026	-5.56409	1.15099e-21	product_name=HAD-like domain-containing protein
1347010	-5.56355	5.53117e-39	product_name=hypothetical protein
1594941	-5.562	4.31921e-16	product_name=glycoside hydrolase|Glycoside Hydrolase Family 5 protein
1537960	-5.55669	1.89765e-78	product_name=hypothetical protein
1591463	-5.55434	3.81128e-55	product_name=C2H2-type Zinc finger transcription factor|C2H2-type zinc finger transcription factor OAD06987.1 C2H2-type zinc finger transcription factor
1467427	-5.55357	1.10267e-184	product_name=Helix-loop-helix DNA-binding domain-containing transcription factor|helix-loop-helix DNA-binding domain-containing transcription factor OAD01078.1 helix-loop-helix DNA-binding domain-containing transcription factor
1543406	-5.5513	7.74635e-71	product_name=glycosyltransferase family 49 protein
1489301	-5.54865	1.51166e-271	product_name=hypothetical protein
1502584	-5.54144	1.75777e-65	product_name=hypothetical protein
1455290	-5.53663	2.30894e-176	product_name=Major facilitator superfamily domain-containing protein
1546204	-5.53037	4.18497e-186	product_name=expressed protein
1529691	-5.52045	7.08095e-71	product_name=hypothetical protein
1526571	-5.51771	1.13282e-77	product_name=hypothetical protein
1457077	-5.5131	3.25922e-50	product_name=hypothetical protein
1455582	-5.5116	6.04184e-96	product_name=sec7 domain-containing protein
1351086	-5.51061	1.08115e-43	product_name=HotDog domain-containing protein
1547271	-5.50879	4.25448e-13	product_name=hypothetical protein
1460088	-5.50319	1.34561e-17	product_name=hypothetical protein
1491770	-5.50217	1.76605e-193	product_name=Cytidine deaminase-like protein
1387974	-5.49898	6.52748e-102	product_name=helix-loop-helix DNA-binding domain-containing protein
1481806	-5.49664	3.13115e-25	product_name=hypothetical protein
1106105	-5.49653	7.29325e-30	product_name=hypothetical protein
1570125	-5.49568	0.000292908	product_name=winged helix DNA-binding domain-containing protein
1595034	-5.48745	3.89653e-26	product_name=hypothetical protein
1411219	-5.48555	2.62445e-09	product_name=hypothetical protein
1540144	-5.48534	2.68336e-70	product_name=hypothetical protein
1482184	-5.48458	1.52121e-93	product_name=hypothetical protein
1601490	-5.48456	5.86842e-199	product_name=Alpha/Beta hydrolase fold
1335829	-5.48297	3.53274e-266	product_name=glycosyltransferase family 2 protein
1593427	-5.48222	5.64172e-05	product_name=hypothetical protein
1063598	-5.48197	1.14694e-30	product_name=hypothetical protein
1345133	-5.47903	8.17555e-14	product_name=hypothetical protein
1489644	-5.4772	0	product_name=hypothetical protein
1601399	-5.47484	9.15959e-125	product_name=chaperonin 10-like protein
1528810	-5.47181	1.60787e-99	product_name=hypothetical protein
1511764	-5.46463	4.95969e-59	product_name=hypothetical protein
1543725	-5.46351	5.17566e-101	product_name=Gti1/Pac2 family-domain containing protein
1469851	-5.45327	4.65448e-62	product_name=expressed protein
1588800	-5.43901	1.36018e-69	product_name=hypothetical protein
1170198	-5.43131	4.08848e-11	product_name=hypothetical protein
1442569	-5.42973	6.35106e-102	product_name=expressed protein
1505679	-5.42678	2.61264e-59	product_name=DHHC palmitoyltransferase-domain-containing protein
1542618	-5.42665	1.1784e-18	product_name=Isochorismatase-like protein
1455501	-5.42497	2.35908e-30	product_name=Dbl homology domain-containing protein
1520470	-5.41951	3.41338e-153	product_name=hypothetical protein
1350842	-5.41911	4.80666e-54	product_name=Transmembrane amino acid transporter protein-domain containing protein
1514339	-5.41909	4.39962e-18	product_name=hypothetical protein
1591290	-5.41482	1.14721e-285	product_name=O-methyltransferase-domain containing protein
1356120	-5.41347	1.06213e-85	product_name=Acyl-CoA dehydrogenase/oxidase%2C N-terminal and middle domain-containing protein
1572414	-5.40733	6.41443e-05	product_name=Metallo-dependent phosphatase-like protein
1517048	-5.39911	2.5743e-76	product_name=hypothetical protein
1572680	-5.39837	3.71028e-13	product_name=polysaccharide lyase|Polysaccharide Lyase Family 8 protein
1482760	-5.39762	5.08e-156	product_name=hypothetical protein
1474672	-5.39507	6.59632e-160	product_name=Bifunctional lycopene cyclase/phytoene synthase
1369487	-5.39242	5.60272e-130	product_name=VTC domain-containing protein
1548305	-5.3921	1.00997e-282	product_name=Uracil phosphoribosyltransferase-domain containing protein
1515886	-5.38796	2.81591e-65	product_name=hypothetical protein
1359587	-5.38664	7.47311e-137	product_name=hypothetical protein
1318131	-5.38496	1.25123e-12	product_name=expressed protein
1383246	-5.38187	8.92461e-51	product_name=Zn(2)-C6 fungal-specific transcription factor OAD09137.1 Zn(2)-C6 fungal-specific transcription factor
1488953	-5.38075	1.77047e-53	product_name=hypothetical protein
1393096	-5.3712	6.99055e-05	product_name=Actin cortical patch SUR7/pH-response regulator PalI
1347030	-5.36856	1.1987e-238	product_name=chitin synthase
1564354	-5.36534	3.23305e-21	product_name=Tetraspanin family-domain-containing protein
1390105	-5.36444	3.78685e-22	product_name=hypothetical protein
1432167	-5.36437	2.54195e-06	product_name=hypothetical protein
1512068	-5.357	3.2165e-229	product_name=cytochrome P450
1480348	-5.35673	8.72526e-44	product_name=hypothetical protein
1470497	-5.3549	2.66889e-49	product_name=Sucrase/ferredoxin-like-domain containing protein
1591989	-5.35404	5.85649e-89	product_name=glycoside hydrolase|Glycoside Hydrolase Family 5 protein
1509106	-5.35205	4.93138e-164	product_name=vacuolar protein 8
1500340	-5.3511	1.65226e-25	product_name=hypothetical protein
1329057	-5.34855	2.55579e-13	product_name=hypothetical protein
1577180	-5.34483	4.69732e-12	product_name=major facilitator superfamily domain-containing protein
1443996	-5.34476	2.72718e-125	product_name=Protein kinase-like domain-containing protein
1351971	-5.33944	1.50725e-39	product_name=P-loop containing nucleoside triphosphate hydrolase protein
1554693	-5.33723	5.06798e-68	product_name=putative calmodulin
1332337	-5.33312	1.1001e-20	product_name=hypothetical protein
1134463	-5.33229	5.1207e-51	product_name=Thaumatin
1569195	-5.32638	4.83474e-11	product_name=hypothetical protein
1506475	-5.32294	0	product_name=Distantly related to plant expansins|RlpA-like double-psi beta-barrel-containing protein domain-containing protein
1505846	-5.3227	1.26846e-104	product_name=expressed protein
1475577	-5.3165	2.80064e-39	product_name=phosphatases II
1161978	-5.31603	5.65341e-17	product_name=hypothetical protein
1572026	-5.31311	3.37367e-06	product_name=hypothetical protein
1517699	-5.31309	1.21455e-26	product_name=P-loop containing nucleoside triphosphate hydrolase protein
1370995	-5.3091	1.69655e-73	product_name=Amino acid permease/ SLC12A domain-containing protein
1491432	-5.30706	2.45163e-15	product_name=expressed protein
1477962	-5.30668	2.62436e-57	product_name=hypothetical protein
1507599	-5.30655	1.7982e-61	product_name=hypothetical protein
1579544	-5.30596	9.34424e-32	product_name=platelet-activating factor acetylhydrolase
1490244	-5.30442	0	product_name=chitin deacetylase
1485663	-5.30439	2.91412e-121	product_name=hypothetical protein|Zn finger transcription factor similar to WC-2
1570795	-5.29541	1.74517e-14	product_name=cation-transporting ATPase
1375876	-5.29335	0.000166878	product_name=isoform a
1364399	-5.29279	1.16064e-12	product_name=hypothetical protein
1594063	-5.28937	8.81045e-11	product_name=Distantly related to plant expansins|hypothetical protein
1601487	-5.28759	1.22528e-124	product_name=S-adenosyl-L-methionine-dependent methyltransferase
1369147	-5.28734	9.70667e-56	product_name=hypothetical protein
1450926	-5.28464	8.55914e-15	product_name=NADP-dependent oxidoreductase domain-containing protein
1385957	-5.28447	1.17114e-10	product_name=RlpA-like double-psi beta-barrel-protein domain-containing protein-containing protein
1569918	-5.28398	2.5301e-24	product_name=Peptidase C19%2C ubiquitin-specific peptidase%2C DUSP domain-containing protein
1461324	-5.28051	1.6761e-107	product_name=hypothetical protein
1570864	-5.27949	0.000749125	product_name=C2H2-type Zinc finger transcription factor|C2H2-type zinc finger transcription factor OAD00951.1 C2H2-type zinc finger transcription factor
1509360	-5.27735	1.66235e-47	product_name=concanavalin A-like lectin/glucanase domain-containing protein
1576602	-5.27656	0.00074432	product_name=hypothetical protein
1392593	-5.27383	1.43695e-52	product_name=hypothetical protein
1378134	-5.27369	0	product_name=Ribonucleotide reductase%2C small chain-domain containing protein
1120711	-5.27299	8.52691e-103	product_name=hypothetical protein
1370343	-5.27074	7.94143e-48	product_name=hypothetical protein
1377456	-5.26918	2.40188e-61	product_name=Domain of unknown function (DUF4203)-domain containing protein
1471857	-5.26657	8.32941e-85	product_name=hypothetical protein
1507471	-5.2652	6.7938e-06	product_name=hypothetical protein
1468290	-5.26157	6.17915e-139	product_name=kinase-like domain-containing protein
1561619	-5.26036	6.95391e-31	product_name=Calycin-like protein
1569662	-5.26028	1.40627e-12	product_name=Glycosyl hydrolases family 18-domain containing protein
1477945	-5.25583	2.90149e-22	product_name=hypothetical protein
1579453	-5.24957	0.000273547	product_name=hypothetical protein
1449623	-5.24912	2.06974e-10	product_name=hypothetical protein
1323600	-5.24526	3.51478e-12	product_name=hypothetical protein
1514748	-5.23691	8.86081e-33	product_name=Phospholipase/carboxylesterase/thioesterase
1584817	-5.23637	1.2182e-13	product_name=Protein-tyrosine phosphatase-like protein
1481788	-5.23341	0	product_name=hypothetical protein
1474666	-5.22085	6.12351e-190	product_name=phytoene dehydrogenase
1449027	-5.21704	1.17683e-138	product_name=expressed protein
1460641	-5.21677	1.34186e-53	product_name=hypothetical protein
1485516	-5.21629	8.33591e-56	product_name=hypothetical protein
1598962	-5.20945	1.97405e-49	product_name=hypothetical protein
1140241	-5.20477	2.78255e-154	product_name=C2H2-type zinc finger transcription factor
1377508	-5.20475	1.29361e-20	product_name=Protein of unknown function (DUF1479)-domain containing protein
1497733	-5.20158	1.27407e-172	product_name=hypothetical protein
1475573	-5.19439	2.24415e-07	product_name=hypothetical protein
1510834	-5.189	6.67689e-64	product_name=hypothetical protein
1588626	-5.18715	2.26562e-47	product_name=cleft lip and palate transmembrane protein 1-domain-containing protein
1451738	-5.18659	1.17472e-110	product_name=hypothetical protein
1508011	-5.18157	5.42769e-305	product_name=hypothetical protein|Zn(2)-C6 fungal-specific transcription factor
1471551	-5.17339	2.08829e-52	product_name=hypothetical protein
1369800	-5.17153	6.06712e-175	product_name=Peptidase S8/S53 domain-containing protein
1489127	-5.17019	1.28007e-66	product_name=P-loop containing nucleoside triphosphate hydrolase protein
1459039	-5.16809	2.63432e-64	product_name=hypothetical protein
1583595	-5.16496	1.49615e-72	product_name=hypothetical protein
1533305	-5.16371	4.77732e-153	product_name=kinase-like domain-containing protein
1476131	-5.16288	1.03553e-192	product_name=hypothetical protein
1376086	-5.16036	0	product_name=Glyceraldehyde-3-phosphate dehydrogenase 2
1553987	-5.15927	4.55734e-56	product_name=hypothetical protein
1474008	-5.1576	0	product_name=hypothetical protein
1552700	-5.15617	1.1231e-96	product_name=Protein of unknown function (DUF3712)-domain containing protein
1473532	-5.15518	2.17058e-52	product_name=Small GTPase superfamily
1379970	-5.15262	2.33235e-223	product_name=hypothetical protein
1049721	-5.14712	1.7723e-27	product_name=hypothetical protein
1584065	-5.14574	2.38834e-16	product_name=G protein alpha subunit|G protein alpha subunit OAD07459.1 G protein alpha subunit
1559669	-5.14321	9.48566e-32	product_name=hypothetical protein
1514758	-5.142	5.93445e-191	product_name=major facilitator superfamily domain-containing protein
1434243	-5.13474	0.00113566	product_name=hypothetical protein
1332087	-5.1343	2.96121e-12	product_name=hypothetical protein
1586462	-5.12972	1.96084e-22	product_name=Regulator of G protein signaling domain-domain containing protein
1466334	-5.12928	1.26035e-77	product_name=hypothetical protein
1450179	-5.12874	1.23697e-68	product_name=Carboxyl transferase
1335643	-5.12506	1.23481e-05	product_name=hypothetical protein
1576665	-5.12407	0.001244	product_name=GATA-type zinc finger transcription factor
1548494	-5.12341	5.10618e-08	product_name=S-adenosyl-L-methionine-dependent methyltransferase
1467536	-5.12263	8.46394e-288	product_name=hypothetical protein
1388510	-5.12256	1.04124e-85	product_name=ADP-ribosylation factor family-domain containing protein
1477165	-5.12254	3.07048e-188	product_name=p53-like transcription factor|p53-like transcription factor OAD07988.1 p53-like transcription factor
1528476	-5.12181	2.17646e-187	product_name=hypothetical protein
1538817	-5.11473	0.000333282	product_name=expressed protein
1387290	-5.11406	1.71675e-225	product_name=hypothetical protein
1448896	-5.10947	3.18513e-194	product_name=hypothetical protein
1463710	-5.10861	9.55447e-139	product_name=ras guanine nucleotide exchange factor domain-containing protein
1562924	-5.10629	4.10912e-45	product_name=kinase-like domain-containing protein
1485943	-5.10429	1.4312e-41	product_name=hypothetical protein
1468170	-5.10403	3.32849e-141	product_name=hypothetical protein
1512668	-5.10346	1.00325e-41	product_name=hypothetical protein
1467110	-5.10292	1.19051e-05	product_name=hypothetical protein
1389313	-5.10193	0.000274293	product_name=hypothetical protein
1471342	-5.1015	2.95227e-190	product_name=hypothetical protein
1461876	-5.09915	8.75031e-245	product_name=hypothetical protein
1503002	-5.09409	7.5517e-157	product_name=family 49 glycosyltransferase
1498481	-5.09281	2.11362e-133	product_name=hypothetical protein
1348346	-5.08981	2.04888e-16	product_name=G protein gamma subunit|G-protein gamma-like domain-containing protein
1540083	-5.07983	2.03288e-36	product_name=kinase-like domain-containing protein
1523594	-5.07747	5.94211e-136	product_name=hypothetical protein
1491679	-5.07526	0	product_name=Pyridoxal phosphate-dependent transferase
1519717	-5.07524	4.79341e-131	product_name=G protein alpha subunit|G protein alpha subunit OAD03359.1 G protein alpha subunit
1178961	-5.06937	2.09523e-53	product_name=hypothetical protein
1511474	-5.06883	3.89568e-114	product_name=hypothetical protein
1540607	-5.06837	1.28044e-68	product_name=LITAF-like zinc ribbon domain-domain containing protein
1333955	-5.06738	0	product_name=Ser-Thr-rich glycosyl-phosphatidyl-inositol-anchored membrane family-domain-containing protein
1455676	-5.06261	3.00251e-26	product_name=cora-domain-containing protein
1451329	-5.04634	4.72148e-30	product_name=hypothetical protein
1473620	-5.04041	7.12055e-121	product_name=Distantly related to plant expansins|RlpA-like double-psi beta-barrel-containing protein domain-containing protein
1542139	-5.03804	1.86319e-75	product_name=Ras guanine nucleotide exchange factor domain-containing protein
1362444	-5.03633	7.48072e-164	product_name=ARM repeat-containing protein
1456497	-5.03439	7.98416e-61	product_name=Small GTPase superfamily
1587034	-5.03285	4.05828e-45	product_name=hypothetical protein
1555378	-5.03186	1.80769e-21	product_name=hypothetical protein
1387587	-5.0306	8.31775e-13	product_name=hypothetical protein
1594019	-5.02202	0.00174747	product_name=Endoribonuclease L-PSP/chorismate mutase-like protein
1596569	-5.01935	6.52557e-120	product_name=Acyl-CoA dehydrogenase/oxidase%2C N-terminal and middle domain-containing protein
1560071	-5.0092	2.37938e-08	product_name=Eisosome component PIL1-domain containing protein
1058846	-5.00848	2.40409e-44	product_name=hypothetical protein
1373776	-5.00655	1.58654e-11	product_name=hypothetical protein
1363539	-5.00383	1.1276e-22	product_name=rhizopuspepsin precursor-like protein
1544631	-5.00096	1.1561e-77	product_name=hypothetical protein
1485923	-4.99943	1.71017e-13	product_name=hypothetical protein
1487296	-4.99618	1.09212e-75	product_name=Domain of unknown function DUF221-domain containing protein
1544811	-4.9939	2.22748e-74	product_name=pkinase-domain-containing protein
1514747	-4.99363	1.23941e-114	product_name=hypothetical protein
1578714	-4.99358	3.12699e-10	product_name=hypothetical protein
1462870	-4.99169	2.02232e-237	product_name=Formate--tetrahydrofolate ligase-domain containing protein
1110744	-4.98506	0.000386831	product_name=hypothetical protein
1359682	-4.98245	1.26509e-170	product_name=cytochrome P450
1594130	-4.98178	1.15367e-277	product_name=Saccharopine dehydrogenase-domain containing protein
1455193	-4.97798	1.5155e-72	product_name=Acyl-CoA dehydrogenase/oxidase C-terminal
1137024	-4.97104	2.75565e-06	product_name=glycoside hydrolase superfamily
1537932	-4.97059	8.48889e-40	product_name=rho GTPase activator protein
1325942	-4.96592	1.93499e-11	product_name=hypothetical protein
1593586	-4.96549	1.47685e-80	product_name=kinase-like domain-containing protein
1460308	-4.96539	3.8789e-141	product_name=hypothetical protein
1386130	-4.96528	1.69e-122	product_name=riboflavin aldehydeforming enzyme
1327779	-4.96503	0.00275589	product_name=hypothetical protein
1552580	-4.96209	4.39276e-124	product_name=expressed protein
1473983	-4.96165	1.05293e-39	product_name=hypothetical protein
1491566	-4.95912	5.50107e-153	product_name=NADP-dependent oxidoreductase domain-containing protein
1500105	-4.95802	0	product_name=Protein of unknown function (Ytp1)-domain containing protein
1377545	-4.95715	5.22314e-87	product_name=hypothetical protein
1474215	-4.95366	7.44579e-29	product_name=CYP5208|CYP5208 OAD07678.1 CYP5208 protein
1494808	-4.9531	2.28815e-200	product_name=methylcrotonoyl-CoA carboxylase beta chain
1499148	-4.95152	1.92309e-200	product_name=Protein of unknown function (DUF1394)-domain containing protein
1529873	-4.95033	2.50068e-54	product_name=hypothetical protein
1374232	-4.95003	2.44115e-237	product_name=ammonium transporter AmtB-like domain-containing protein
1061866	-4.94397	1.93782e-87	product_name=WD40-repeat-containing domain protein
1540750	-4.94397	2.75357e-151	product_name=phosphate:H+ symporter
1464184	-4.94363	2.51785e-106	product_name=P-loop containing nucleoside triphosphate hydrolase protein
1358871	-4.94357	1.27579e-10	product_name=hypothetical protein
1500038	-4.9391	6.59599e-132	product_name=Carbonic anhydrase
1346268	-4.93701	1.50944e-63	product_name=hypothetical protein
1479208	-4.9274	8.53742e-81	product_name=hypothetical protein
1355485	-4.92629	7.78137e-10	product_name=hypothetical protein
1502557	-4.92403	1.8169e-114	product_name=Helix-loop-helix DNA-binding domain-containing transcription factor|helix-loop-helix DNA-binding domain-containing transcription factor OAD09049.1 helix-loop-helix DNA-binding domain-containing transcription factor
1598711	-4.91845	5.06081e-127	product_name=chitin deacetylase
1595445	-4.91696	1.75829e-30	product_name=Na+ dependent nucleoside transporter C-terminus-domain-containing protein
1417175	-4.91583	0.00303748	product_name=C2H2-type zinc finger transcription factor
1415118	-4.90909	9.72143e-155	product_name=hypothetical protein
1521190	-4.90888	0	product_name=hypothetical protein
1319860	-4.90767	0	product_name=non-structural maintenance of chromosomes element 1
1496987	-4.90705	2.41442e-117	product_name=hypothetical protein
1516079	-4.90357	4.55891e-34	product_name=hypothetical protein
1351436	-4.90309	2.46918e-66	product_name=hypothetical protein
1501966	-4.90041	3.4812e-66	product_name=hypothetical protein
1544360	-4.89144	4.01235e-298	product_name=acyl-CoA N-acyltransferase
1356462	-4.88943	1.46681e-79	product_name=4-aminobutyrate aminotransferase
1320709	-4.88575	3.29089e-06	product_name=SMAD/FHA domain-containing protein
1539878	-4.8844	1.0468e-86	product_name=hypothetical protein
1518826	-4.88235	1.74508e-87	product_name=Gti1/Pac2 family-domain-containing protein
1392990	-4.87859	2.19978e-17	product_name=hypothetical protein
1430355	-4.87613	0.00276076	product_name=hypothetical protein
1365018	-4.87595	6.0968e-135	product_name=kinase-like domain-containing protein
1520079	-4.87565	4.10279e-162	product_name=hypothetical protein
1584919	-4.87373	1.25955e-99	product_name=hypothetical protein
1341565	-4.87327	4.28067e-94	product_name=hypothetical protein
1354395	-4.86894	5.97219e-07	product_name=hypothetical protein
1297275	-4.86588	1.47612e-194	product_name=hypothetical protein
1589798	-4.84988	2.20733e-26	product_name=hypothetical protein
1488677	-4.84862	5.57274e-90	product_name=Tetraspanin family-domain-containing protein
1495239	-4.84832	4.23554e-19	product_name=Gamma-glutamyltranspeptidase
1456379	-4.84372	8.35543e-99	product_name=hypothetical protein
1433625	-4.84232	4.36404e-16	product_name=expressed protein
1450884	-4.84044	5.98557e-14	product_name=hypothetical protein
1447257	-4.8354	7.41231e-18	product_name=hypothetical protein
1388821	-4.83536	0	product_name=hypothetical protein
1523825	-4.83416	3.27207e-163	product_name=Protein of unknown function (DUF1295)-domain containing protein
1492436	-4.83402	1.79354e-38	product_name=Major facilitator superfamily domain-containing protein
1362083	-4.83029	7.97857e-05	product_name=Glycoside Hydrolase Family 3 protein|glycoside hydrolase superfamily
1471195	-4.82851	4.31695e-147	product_name=Oxysterol-binding protein-domain containing protein
1484004	-4.82635	3.92967e-45	product_name=hypothetical protein
1527312	-4.82577	1.43744e-190	product_name=hypothetical protein
1375812	-4.82522	5.79583e-08	product_name=hypothetical protein
1590775	-4.82006	5.5346e-05	product_name=hypothetical protein
1466266	-4.8129	4.93211e-122	product_name=hypothetical protein
1351757	-4.79962	1.32444e-48	product_name=hypothetical protein
1593642	-4.79541	1.47056e-20	product_name=hypothetical protein
1592009	-4.79506	0.00645382	product_name=Protein of unknown function (DUF1688)-domain containing protein
1585644	-4.79476	1.05107e-246	product_name=SUR7/PalI family-domain-containing protein
1545582	-4.79331	5.90801e-36	product_name=expressed protein
1534150	-4.78984	2.87395e-81	product_name=hypothetical protein
1369978	-4.78725	1.12671e-22	product_name=kinase-like domain-containing protein
1498536	-4.78567	1.09631e-95	product_name=hypothetical protein
1492313	-4.78377	5.86575e-56	product_name=hypothetical protein
1499263	-4.77697	1.12652e-169	product_name=hypothetical protein
1586775	-4.7711	0	product_name=hypothetical protein
1596907	-4.76503	5.83545e-33	product_name=SNF2 family N-terminal domain-containing protein
1533010	-4.76458	7.55742e-66	product_name=HotDog domain-containing protein
1474024	-4.7641	0.000933513	product_name=Hydrophobic surface binding protein A-domain containing protein
1510190	-4.76202	6.13828e-38	product_name=major facilitator superfamily domain-containing protein
1516124	-4.75918	2.55615e-121	product_name=mitochondrial carrier domain-containing protein
1530795	-4.75856	3.85073e-178	product_name=GNS1/SUR4 family-domain containing protein
1353063	-4.75337	4.37305e-10	product_name=general substrate transporter
1079767	-4.75298	0.00117628	product_name=hypothetical protein
1439908	-4.75267	7.75609e-05	product_name=hypothetical protein
1567989	-4.74828	0.0047875	product_name=C2H2-type zinc finger transcription factor
1513926	-4.7475	1.90119e-46	product_name=alkylglycerol monooxygenase
1384833	-4.742	0.00105289	product_name=C2H2-type zinc finger transcription factor
1484473	-4.73883	0	product_name=hypothetical protein
1306538	-4.73531	0.00101033	product_name=hypothetical protein
1533515	-4.73109	0	product_name=Cupredoxin
1462641	-4.73075	5.31669e-33	product_name=Histidine phosphatase superfamily
1504306	-4.73071	2.30989e-113	product_name=hypothetical protein
1440217	-4.72929	0.00106522	product_name=hypothetical protein
1572278	-4.7283	5.70118e-17	product_name=hypothetical protein
1542754	-4.72812	0.00101994	product_name=hypothetical protein
1566005	-4.72327	2.81545e-24	product_name=hypothetical protein
1537815	-4.72223	2.75945e-87	product_name=hypothetical protein
1569030	-4.72203	2.58054e-06	product_name=hypothetical protein
1544364	-4.71688	3.22315e-79	product_name=hypothetical protein
1545787	-4.71285	3.81406e-13	product_name=expressed protein
1536224	-4.71008	1.7031e-142	product_name=hypothetical protein
1552246	-4.70739	8.25593e-26	product_name=hypothetical protein
1546986	-4.70306	1.48669e-51	product_name=hypothetical protein
1588836	-4.69963	1.78352e-06	product_name=hypothetical protein
1349700	-4.69858	1.88694e-06	product_name=hypothetical protein
1370079	-4.69751	1.60439e-52	product_name=hypothetical protein
1471575	-4.68977	5.36196e-103	product_name=hypothetical protein
1546233	-4.68636	0	product_name=hypothetical protein
1370951	-4.68082	8.16361e-95	product_name=hypothetical protein
1478934	-4.6779	7.25557e-09	product_name=hypothetical protein
1449798	-4.67512	4.0096e-21	product_name=hypothetical protein
1367286	-4.67414	2.55419e-120	product_name=hypothetical protein
1499887	-4.67236	6.08912e-103	product_name=hypothetical protein
1573151	-4.67225	0.00158249	product_name=Amino acid/polyamine transporter I
1582593	-4.6688	2.3214e-20	product_name=hypothetical protein
1506578	-4.66874	0.00718104	product_name=expressed protein
1447584	-4.66864	1.9554e-31	product_name=hypoxia induced protein conserved region-domain-containing protein
1408309	-4.66329	1.46515e-06	product_name=expressed protein
1533714	-4.66279	1.39556e-125	product_name=Basic-leucine zipper (bZIP) transcription factor|basic-leucine zipper transcription factor OAC99923.1 basic-leucine zipper transcription factor
1594213	-4.66157	1.68121e-141	product_name=General substrate transporter
1546038	-4.66126	0	product_name=endopeptidase
1500684	-4.66114	2.35247e-49	product_name=glycosyltransferase|Glycosyltransferase Family 5 protein
1585462	-4.65805	1.01344e-29	product_name=hypothetical protein
1593963	-4.65698	2.0096e-08	product_name=chitin synthase
1540278	-4.65257	1.89582e-75	product_name=Major facilitator superfamily domain-containing protein
1481816	-4.65122	8.4475e-65	product_name=DUF803 domain membrane protein
1589520	-4.65096	2.01869e-06	product_name=hypothetical protein
1508037	-4.64735	7.78586e-134	product_name=hypothetical protein
1576673	-4.64278	2.91824e-14	product_name=hypothetical protein
1450682	-4.64275	2.95525e-168	product_name=trehalase-domain-containing protein
1544096	-4.64168	1.50329e-155	product_name=hypothetical protein
1326827	-4.63857	0.00828888	product_name=hypothetical protein
1531204	-4.63723	0	product_name=hypothetical protein
1448191	-4.63696	1.00999e-19	product_name=hypothetical protein
1459889	-4.63672	2.29483e-290	product_name=hypothetical protein
1032529	-4.63365	2.7822e-18	product_name=hypothetical protein
1513073	-4.63266	1.10535e-29	product_name=hypothetical protein
1413485	-4.63153	4.68798e-06	product_name=Regulator of G protein signaling domain-domain containing protein
1378578	-4.62734	8.91166e-61	product_name=Major facilitator superfamily domain-containing protein
1598777	-4.62635	3.12291e-84	product_name=muskelin
1378007	-4.62572	1.62173e-159	product_name=hypothetical protein
1360445	-4.62432	2.93915e-27	product_name=hypothetical protein
1578840	-4.62431	5.63498e-12	product_name=Distantly related to plant expansins|hypothetical protein
1480448	-4.62381	1.08726e-247	product_name=hypothetical protein
1460297	-4.62372	0	product_name=Protein of unknown function (DUF3759)-domain containing protein
1384767	-4.61966	5.23522e-209	product_name=hypothetical protein
1328040	-4.61887	6.85217e-11	product_name=Permease family-domain containing protein
1489530	-4.61475	2.98029e-241	product_name=translation initiation factor SUI1
1359278	-4.61331	2.69485e-19	product_name=hypothetical protein
1576076	-4.61014	3.73765e-08	product_name=hypothetical protein
1446091	-4.60794	6.04148e-11	product_name=C2H2-type Zinc finger transcription factor|C2H2-type zinc finger transcription factor OAD04673.1 C2H2-type zinc finger transcription factor
1456131	-4.60772	3.67593e-56	product_name=hypothetical protein
1323517	-4.60751	0.00830751	product_name=hypothetical protein
1471459	-4.60587	1.13903e-209	product_name=beta-lactamase superfamily domain-containing protein
1556397	-4.60566	7.10771e-59	product_name=Alpha/Beta hydrolase fold
1514624	-4.60526	4.88038e-149	product_name=grainyhead-like protein 1
1537003	-4.60047	7.76209e-76	product_name=expressed protein
1499053	-4.59824	4.39233e-84	product_name=hypothetical protein
1545731	-4.59618	1.56928e-72	product_name=gamma-glutamyltranspeptidase
1513712	-4.59457	1.35665e-95	product_name=kinase-like domain-containing protein
1334309	-4.59143	0.0004689	product_name=Phosphate transporter
1530811	-4.59004	1.73993e-136	product_name=1-acylglycerol-3-phosphate acyltransferase protein
1457384	-4.58978	5.48465e-42	product_name=hypothetical protein
1490927	-4.58107	3.17376e-131	product_name=Enolase C-terminal domain-like protein
1577715	-4.57908	0.0114135	product_name=hypothetical protein
1383741	-4.57049	1.15089e-134	product_name=Mitochondrial carrier domain-containing protein
1483431	-4.57048	7.43249e-47	product_name=CCAAT-binding transcription factor (CBF-B/NF-YA) subunit B-domain-containing protein
1356084	-4.56874	0.000201388	product_name=Distantly related to plant expansins|hypothetical protein
1391998	-4.5671	1.51705e-12	product_name=hypothetical protein
1484609	-4.56425	1.29084e-97	product_name=DUF803 domain membrane protein
1513864	-4.56125	1.23049e-52	product_name=hypothetical protein
1550163	-4.55881	7.43982e-239	product_name=Metallo-dependent phosphatase-like protein
1487288	-4.55516	1.35488e-08	product_name=Frag1/DRAM/Sfk1
1452060	-4.55255	3.13972e-102	product_name=expressed protein
1410353	-4.55191	0.000136361	product_name=hypothetical protein
1540362	-4.5519	8.61064e-11	product_name=hypothetical protein
1586282	-4.55144	6.02547e-06	product_name=lipase
1530273	-4.55039	1.67123e-73	product_name=HCP-like protein
1382080	-4.54649	3.03943e-258	product_name=class II peroxidase
1577919	-4.54648	2.99015e-42	product_name=pkinase-domain-containing protein
1457033	-4.54529	9.51466e-44	product_name=Small GTPase superfamily
1488887	-4.54336	2.94781e-54	product_name=SCP2 sterol-binding domain-containing protein
1577712	-4.54184	0.00407047	product_name=hypothetical protein
1538145	-4.54166	1.39193e-158	product_name=hypothetical protein
1594458	-4.5397	6.33759e-73	product_name=SWIB/MDM2 domain-domain containing protein
1571423	-4.53954	2.92405e-09	product_name=hypothetical protein
1600506	-4.53893	1.52422e-79	product_name=Transferase
1453515	-4.53864	6.05214e-98	product_name=Glycoside Hydrolase Family 5 protein|glycoside hydrolase superfamily
1471333	-4.53711	0.0019016	product_name=expressed protein
1583501	-4.53572	1.065e-120	product_name=hypothetical protein
1480110	-4.53195	7.44134e-48	product_name=RlpA-like double-psi beta-barrel-protein domain-containing protein-containing protein
1573944	-4.52747	0.00206155	product_name=hypothetical protein
1480992	-4.52707	1.0908e-30	product_name=hypothetical protein
1443321	-4.52706	1.21961e-22	product_name=hypothetical protein
1444006	-4.52226	0.00390764	product_name=hypothetical protein
1482230	-4.51944	1.95407e-108	product_name=hypothetical protein
1059290	-4.51876	0.000429952	product_name=hypothetical protein
1600328	-4.51814	4.70655e-13	product_name=Major facilitator superfamily domain-containing protein
1481383	-4.51746	2.31376e-28	product_name=hypothetical protein
1581301	-4.51316	0.00989896	product_name=hypothetical protein
1511344	-4.51041	3.52765e-87	product_name=putative succinyl-coa ligase
1382245	-4.49799	6.25921e-162	product_name=Protein of unknown function (DUF1749)-domain containing protein
1347043	-4.49755	4.64092e-07	product_name=hypothetical protein
1527682	-4.49676	3.9105e-138	product_name=calponin homology domain-containing protein
1431965	-4.49631	0.00404793	product_name=hypothetical protein
1367844	-4.4923	4.8483e-177	product_name=hypothetical protein
1389618	-4.49202	9.86346e-23	product_name=hypothetical protein
1540966	-4.49066	7.50188e-91	product_name=hypothetical protein
1560227	-4.49041	4.08683e-06	product_name=hypothetical protein
1387305	-4.49023	0.0115154	product_name=hypothetical protein
1460530	-4.48874	3.95683e-215	product_name=hypothetical protein
1514924	-4.48726	1.105e-55	product_name=hypothetical protein
1344199	-4.48348	2.01711e-59	product_name=ras guanine nucleotide exchange factor domain-containing protein
1479353	-4.48248	1.17953e-28	product_name=Sodium/sulfate symporter
1435031	-4.48184	1.59546e-18	product_name=Periplasmic binding protein-like I
1486117	-4.48152	1.14656e-110	product_name=hypothetical protein
1569021	-4.47546	0.00387787	product_name=hypothetical protein
1540851	-4.46806	1.12051e-174	product_name=sulfate transporter family-domain-containing protein
1513078	-4.46401	1.49347e-266	product_name=hypothetical protein
1488761	-4.45487	0	product_name=C2 domain-containing protein
1381758	-4.45436	2.22996e-162	product_name=coatomer protein alpha subunit
1479113	-4.45272	2.57667e-245	product_name=major facilitator superfamily domain-containing protein
1343225	-4.44874	0.0140362	product_name=hypothetical protein
1343115	-4.4482	2.0444e-47	product_name=Cyclin|cyclin OAD06339.1 cyclin
1503780	-4.44635	9.92774e-62	product_name=hypothetical protein
1474222	-4.44191	3.08379e-10	product_name=hypothetical protein
1319384	-4.43949	4.53295e-35	product_name=hypothetical protein
1596696	-4.43911	1.20773e-26	product_name=hypothetical protein
1347700	-4.43573	7.9351e-39	product_name=hypothetical protein
1537713	-4.43495	2.19568e-22	product_name=hypothetical protein
1384036	-4.42937	1.1514e-12	product_name=hypothetical protein
1568076	-4.4263	9.16459e-08	product_name=VTC domain-containing protein
1475880	-4.42505	0.00265647	product_name=hypothetical protein
1580221	-4.4248	1.54315e-12	product_name=protein-tyrosine phosphatase-like protein
1483268	-4.4241	3.16117e-179	product_name=chitin synthase
1533506	-4.4233	6.07926e-224	product_name=Iron permease FTR1/Fip1/EfeU
1458211	-4.41909	4.00351e-94	product_name=hypothetical protein
1350043	-4.41662	5.2499e-188	product_name=Glutathione S-transferase%2C C-terminal-like protein
1339933	-4.40804	0.0033405	product_name=hypothetical protein
1467353	-4.40791	1.56966e-05	product_name=hypothetical protein
1346571	-4.39464	1.64509e-09	product_name=C2H2-type zinc finger transcription factor
1551079	-4.39355	3.98311e-22	product_name=hypothetical protein
1508018	-4.39338	6.68365e-79	product_name=kinase-like domain-containing protein
1119535	-4.38887	3.87127e-05	product_name=hypothetical protein
1542523	-4.38397	8.72282e-05	product_name=hypothetical protein
1003500	-4.38376	1.19829e-42	product_name=hypothetical protein
1485870	-4.3808	7.88218e-258	product_name=expressed protein
1577371	-4.38052	0.0107775	product_name=hypothetical protein
1465869	-4.37874	1.23246e-53	product_name=ClpP/crotonase-like domain-containing protein
1599503	-4.37685	4.27763e-14	product_name=hypothetical protein
1555567	-4.3759	2.93535e-68	product_name=hypothetical protein
1138192	-4.3752	1.31569e-14	product_name=hypothetical protein
1525026	-4.37409	8.51002e-45	product_name=DnaJ domain-containing protein
1577337	-4.37274	2.49333e-36	product_name=hypothetical protein
1570697	-4.37124	1.67631e-28	product_name=hypothetical protein
1463295	-4.36858	3.01462e-13	product_name=hypothetical protein
1496657	-4.36814	2.03797e-77	product_name=Vaculolar membrane protein-domain-containing protein
1514283	-4.36492	5.71137e-44	product_name=hypothetical protein
1541823	-4.36484	7.15289e-149	product_name=carbohydrate esterase|Carbohydrate Esterase Family 4 protein
1589921	-4.35602	9.20023e-15	product_name=hypothetical protein
1494920	-4.35203	1.31162e-270	product_name=Scd6-like Sm domain-containing protein
1366687	-4.34916	8.88029e-08	product_name=phosphoesterase family-domain-containing protein
1551352	-4.34836	9.90772e-51	product_name=hypothetical protein
1385889	-4.34628	2.15974e-55	product_name=hypothetical protein
1412116	-4.34611	0.0184224	product_name=hypothetical protein
1574474	-4.34448	0.000474602	product_name=hypothetical protein
1338060	-4.3362	1.67831e-05	product_name=Nucleophile aminohydrolases
1480340	-4.33253	1.64296e-60	product_name=TLC domain-domain containing protein
1492187	-4.33191	1.47985e-28	product_name=hypothetical protein
1360264	-4.32931	1.11533e-26	product_name=hypothetical protein
1591585	-4.32775	0.00606241	product_name=expressed protein
1527232	-4.32711	1.11167e-156	product_name=hypothetical protein
1513834	-4.32262	1.54955e-187	product_name=hypothetical protein
1392074	-4.32076	1.38367e-59	product_name=Transferase
1550499	-4.31544	5.41024e-236	product_name=Chloroperoxidase
1437947	-4.30926	2.84187e-15	product_name=Gti1/Pac2 family-domain containing protein
1471660	-4.30429	4.21659e-38	product_name=DUF914-domain-containing protein
1600960	-4.29695	7.53219e-11	product_name=Alpha/Beta hydrolase fold
1519225	-4.2943	9.28929e-115	product_name=acyltransferase ChoActase/COT/CPT
1477449	-4.29368	0	product_name=hypothetical protein
1344997	-4.29295	5.08431e-13	product_name=hypothetical protein
1583067	-4.29251	1.63752e-101	product_name=hypothetical protein
1430811	-4.29059	1.32137e-23	product_name=hypothetical protein
1508769	-4.28721	6.60198e-116	product_name=hypothetical protein
1522754	-4.28004	3.18606e-07	product_name=hypothetical protein
1516482	-4.27737	1.34867e-06	product_name=hypothetical protein
1497304	-4.27447	8.51948e-50	product_name=Ankyrin repeat-containing domain protein
1028090	-4.27345	0.0200427	product_name=hypothetical protein
1536314	-4.2731	1.83542e-113	product_name=homeobox domain-containing protein
1514476	-4.26274	1.98281e-117	product_name=hypothetical protein
1519360	-4.25818	1.16331e-222	product_name=hypothetical protein
1531093	-4.25807	3.34892e-24	product_name=hypothetical protein
1598769	-4.25737	6.53094e-27	product_name=hypothetical protein
1437982	-4.25306	7.82386e-88	product_name=hypothetical protein
1335238	-4.25297	8.2504e-10	product_name=hypothetical protein
1464477	-4.25244	1.22556e-13	product_name=hypothetical protein
1447512	-4.25016	2.83731e-180	product_name=cation efflux family-domain-containing protein
1371288	-4.24731	3.25771e-169	product_name=hypothetical protein
1380612	-4.24481	7.60301e-06	product_name=hypothetical protein
1595683	-4.24324	6.9505e-36	product_name=GroES (chaperonin 10)-like protein
1447272	-4.23559	0.00488226	product_name=hypothetical protein
1482424	-4.23418	1.67491e-130	product_name=acyltransferase ChoActase/COT/CPT
1490733	-4.23194	6.99082e-60	product_name=hypothetical protein
1580386	-4.2314	0.0272148	product_name=hypothetical protein
1469364	-4.23001	6.33135e-39	product_name=hypothetical protein
1359997	-4.22986	7.45698e-63	product_name=S-adenosyl-L-methionine-dependent methyltransferase
1590435	-4.22792	1.17842e-149	product_name=hypothetical protein
1519907	-4.22299	0	product_name=Biopterin-dependent aromatic amino acid hydroxylase-domain containing protein
1351144	-4.22077	4.19284e-18	product_name=Major facilitator superfamily domain-containing protein
1490098	-4.21859	2.33437e-32	product_name=Dbl homology (DH) domain-containing protein
1551092	-4.2141	3.89802e-72	product_name=Helix-loop-helix DNA-binding domain-containing transcription factor|helix-loop-helix DNA-binding domain-containing transcription factor OAD07015.1 helix-loop-helix DNA-binding domain-containing transcription factor
1481799	-4.21366	3.70853e-12	product_name=hypothetical protein
1461672	-4.21007	2.19055e-54	product_name=Alpha/Beta hydrolase fold
1527519	-4.20766	2.45695e-13	product_name=amino acid permease-domain-containing protein
1341214	-4.20652	0.00563858	product_name=hypothetical protein
1370356	-4.20571	8.20241e-20	product_name=OPT oligopeptide transporter protein-domain-containing protein
1451144	-4.20548	1.46657e-165	product_name=hypothetical protein
1373392	-4.20456	0	product_name=Fungalysin metallopeptidase-domain-containing protein
1006973	-4.20233	0.0237851	product_name=hypothetical protein
1527940	-4.20165	6.7794e-224	product_name=glycoside hydrolase|Glycoside Hydrolase Family 37 protein
1470959	-4.20036	6.66035e-32	product_name=hypothetical protein
1391973	-4.19776	2.19653e-11	product_name=hypothetical protein
1586292	-4.19648	4.02504e-05	product_name=carbohydrate esterase|Carbohydrate Esterase Family 16 protein
1090522	-4.19499	1.91652e-39	product_name=carbohydrate esterase|Carbohydrate Esterase Family 16 protein
1351398	-4.18955	1.44609e-12	product_name=kinase-like domain-containing protein
1538801	-4.18776	0.000738288	product_name=hypothetical protein
1548735	-4.18725	5.97786e-182	product_name=hypothetical protein
1334687	-4.18577	0.0292232	product_name=hypothetical protein
1557610	-4.18514	6.51786e-87	product_name=major facilitator superfamily domain-containing protein
1467111	-4.18252	2.36867e-06	product_name=hypothetical protein
1448453	-4.17755	2.13062e-163	product_name=hypothetical protein
1507244	-4.17618	3.02799e-51	product_name=S-adenosyl-L-methionine-dependent methyltransferase
1597799	-4.17512	8.89596e-54	product_name=hypothetical protein
1542648	-4.16921	5.0405e-70	product_name=Basic-leucine zipper (bZIP) transcription factor|basic-leucine zipper transcription factor OAD06305.1 basic-leucine zipper transcription factor
1569679	-4.16387	2.32418e-10	product_name=hypothetical protein
1379179	-4.15953	0.00855023	product_name=Basic-leucine zipper (bZIP) transcription factor|basic-leucine zipper transcription factor
1375971	-4.15936	1.65958e-110	product_name=hypothetical protein
1573496	-4.15633	4.37144e-08	product_name=alpha-L-fucosidase-domain-containing protein
1312433	-4.15573	0.0378064	product_name=hypothetical protein
1533294	-4.15489	5.9915e-125	product_name=hypothetical protein
1598202	-4.15427	6.31316e-85	product_name=hypothetical protein
1518127	-4.1534	1.41559e-278	product_name=hypothetical protein
1395857	-4.15134	1.13299e-20	product_name=hypothetical protein
1571957	-4.14947	7.98924e-231	product_name=hypothetical protein
1563716	-4.14495	0.00807926	product_name=hypothetical protein
1570409	-4.14218	3.71583e-09	product_name=hypothetical protein
1542521	-4.14079	8.19178e-10	product_name=hypothetical protein
1376005	-4.14017	8.43763e-43	product_name=hypothetical protein
1562600	-4.13983	8.77144e-10	product_name=hypothetical protein
1446329	-4.13774	5.01082e-174	product_name=ABC-2 type transporter-domain-containing protein
1594149	-4.13603	1.02042e-16	product_name=hypothetical protein
1585627	-4.13192	1.60534e-129	product_name=hypothetical protein
1510151	-4.13099	5.14888e-62	product_name=glycosyltransferase family 2 protein
1536138	-4.12978	4.12092e-227	product_name=hypothetical protein
1496254	-4.12946	3.47908e-17	product_name=hypothetical protein
1342995	-4.11991	0.0316658	product_name=hypothetical protein
1492156	-4.11869	3.74568e-07	product_name=expressed protein
1389636	-4.11769	3.21434e-29	product_name=hypothetical protein
1512218	-4.11672	5.33968e-79	product_name=hypothetical protein
1522411	-4.11608	2.08933e-84	product_name=hypothetical protein
1594304	-4.11588	2.32146e-30	product_name=hypothetical protein
1516406	-4.11534	2.07575e-16	product_name=expressed protein
1365027	-4.11509	1.50952e-18	product_name=Cupredoxin
1436344	-4.1149	0.0404703	product_name=hypothetical protein
1456599	-4.11029	9.1676e-96	product_name=mitochondrial carrier domain-containing protein
1541309	-4.10945	7.46734e-33	product_name=hypothetical protein
1357784	-4.10914	1.82935e-17	product_name=hypothetical protein
1592237	-4.10435	2.80155e-182	product_name=nucleoside diphosphate-linked moiety X motif 19%2C mitochondrial
1483128	-4.10327	1.43644e-205	product_name=Thiolase%2C N-terminal domain-domain containing protein
1498426	-4.10297	4.96393e-75	product_name=hypothetical protein
1519824	-4.10234	7.25086e-71	product_name=hypothetical protein
1351920	-4.10151	5.26325e-30	product_name=hypothetical protein
1463115	-4.09833	1.79273e-126	product_name=hypothetical protein
1446346	-4.09789	2.15951e-08	product_name=hypothetical protein
1483648	-4.09714	1.16363e-74	product_name=kinase-like domain-containing protein
1455764	-4.09224	2.05475e-28	product_name=hypothetical protein
1461014	-4.08866	4.51784e-181	product_name=P-loop containing nucleoside triphosphate hydrolase protein
1324971	-4.0886	0.00200037	product_name=Glutathione S-transferase%2C C-terminal-like protein
1477953	-4.08716	1.38342e-64	product_name=hypothetical protein
1576613	-4.08691	3.37059e-06	product_name=hypothetical protein
1476501	-4.08602	4.97474e-156	product_name=hypothetical protein
1599618	-4.08536	1.21202e-16	product_name=cell cycle inhibitor nif1 protein
1372664	-4.08494	1.2975e-11	product_name=hypothetical protein
1346466	-4.08284	7.50393e-15	product_name=Arginase family-domain containing protein
1596243	-4.08267	0.0446135	product_name=hypothetical protein
1501959	-4.07749	3.66334e-91	product_name=hypothetical protein
1557000	-4.0748	1.11833e-272	product_name=NAD binding domain of 6-phosphogluconate dehydrogenase-domain containing protein
1571759	-4.07233	1.64508e-05	product_name=hypothetical protein
1578119	-4.07185	0.0382073	product_name=hypothetical protein
1592979	-4.07175	9.31736e-34	product_name=ClpP/crotonase-like domain-containing protein
1538075	-4.06666	0.000234509	product_name=hypothetical protein
1355227	-4.06474	3.32901e-52	product_name=ClpP/crotonase-like domain-containing protein
1582758	-4.06404	6.0566e-268	product_name=hypothetical protein
1319647	-4.05985	1.60733e-09	product_name=hypothetical protein
1370469	-4.05926	7.90429e-59	product_name=hypothetical protein
1483557	-4.05741	2.00054e-24	product_name=NADH-ubiquinone reductase complex 1 MLRQ subunit-domain-containing protein
1551718	-4.05715	1.76787e-19	product_name=expressed protein
1543667	-4.05709	6.955e-307	product_name=Tubulin/FtsZ%2C GTPase domain-containing protein
1513949	-4.04794	9.20937e-47	product_name=Protein of unknown function (DUF3808)-domain containing protein
1499303	-4.04692	1.11864e-86	product_name=P-loop containing nucleoside triphosphate hydrolase protein
1390517	-4.04282	1.34167e-117	product_name=hypothetical protein
1549499	-4.03719	6.78605e-118	product_name=hypothetical protein
1540632	-4.03709	0	product_name=hypothetical protein
1411709	-4.03092	0.0128333	product_name=hypothetical protein
1572488	-4.0309	4.02085e-29	product_name=hypothetical protein
1601469	-4.03057	0.0129958	product_name=hypothetical protein
1508859	-4.03007	3.29788e-236	product_name=Caleosin related protein-domain-containing protein
1447111	-4.02963	0.00255644	product_name=hypothetical protein
1474740	-4.02847	5.45671e-281	product_name=Major facilitator superfamily domain-containing protein
1458157	-4.02665	7.03743e-82	product_name=hypothetical protein
1389831	-4.02395	5.32032e-60	product_name=hypothetical protein
1551512	-4.0215	1.09781e-49	product_name=YABBY protein|yabby protein OAD07056.1 yabby protein
1447800	-4.01473	9.24014e-46	product_name=L-lactate permease-domain containing protein
1485415	-4.01448	6.83657e-34	product_name=C2H2-type zinc finger transcription factor
1583212	-4.0142	3.18808e-24	product_name=glycerol-3-phosphate acyltransferase Sct1
1454034	-4.01416	1.63906e-154	product_name=hypothetical protein
1430338	-4.01293	3.922e-06	product_name=hypothetical protein
1380419	-4.01104	8.12046e-49	product_name=hypothetical protein
1468972	-4.00493	8.62126e-83	product_name=acyl-CoA dehydrogenase/oxidase
1441218	-4.00254	4.36123e-80	product_name=expressed protein
1599215	-4.00247	1.65409e-26	product_name=SPX domain-domain containing protein
1340734	-4.00112	0.0120714	product_name=hypothetical protein
1568964	-3.9976	0.000165427	product_name=hypothetical protein
1131776	-3.99344	0.0416797	product_name=hypothetical protein
1483072	-3.99333	4.01297e-66	product_name=LITAF-like zinc ribbon domain-domain containing protein
1537822	-3.99208	1.87613e-49	product_name=hypothetical protein
1163071	-3.98714	0.0131182	product_name=hypothetical protein
1600912	-3.98491	4.03103e-70	product_name=carboxypeptidase S1
1357487	-3.98474	4.43598e-19	product_name=hypothetical protein
1485863	-3.98441	1.96832e-54	product_name=expressed protein
1330851	-3.98432	0.0422565	product_name=hypothetical protein
1466190	-3.98213	2.57458e-27	product_name=chitin synthase
1389798	-3.9806	0	product_name=hypothetical protein
1500185	-3.97826	4.0544e-135	product_name=hypothetical protein
1532607	-3.97515	1.74534e-166	product_name=major facilitator superfamily domain-containing protein
1478913	-3.97423	4.38915e-93	product_name=ras guanine nucleotide exchange factor domain-containing protein
1442994	-3.97273	8.10451e-12	product_name=hypothetical protein
1564424	-3.97109	1.59607e-05	product_name=hypothetical protein
1386575	-3.97037	8.7487e-27	product_name=hypothetical protein
1354930	-3.9691	1.01039e-112	product_name=C2H2-type zinc finger transcription factor
1454143	-3.96841	5.4242e-27	product_name=chitin deacetylase
1434808	-3.96071	5.01242e-10	product_name=Distantly related to plant expansins|RlpA-like double-psi beta-barrel-containing protein domain-containing protein
1553563	-3.96054	1.31542e-45	product_name=Homeodomain-like DNA binding domain-containing transcription factor|Homeodomain-like DNA binding domain-containing transcription factor OAD07303.1 Homeodomain-like DNA binding domain-containing transcription factor
1494442	-3.96014	6.6355e-197	product_name=Septin-domain-containing protein
1325974	-3.96011	1.74646e-29	product_name=Transcription factor S-II %28TFIIS%29%2C central domain-domain containing protein
1489342	-3.95977	4.02249e-66	product_name=hexokinase
1348539	-3.95555	1.93144e-05	product_name=hypothetical protein
1511900	-3.95539	4.09093e-18	product_name=expressed protein
1532635	-3.95384	6.87772e-126	product_name=transforming protein RhoA
1535290	-3.95341	9.45622e-78	product_name=hypothetical protein
1359521	-3.94679	1.04264e-08	product_name=hypothetical protein
1518363	-3.94196	1.68127e-135	product_name=major facilitator superfamily domain-containing protein
1569774	-3.94135	0.0121991	product_name=hypothetical protein
1491202	-3.94071	5.59613e-94	product_name=hypothetical protein
1557359	-3.94043	2.10741e-34	product_name=hypothetical protein
1431177	-3.93556	3.50024e-05	product_name=expressed protein
1585975	-3.93239	4.08381e-29	product_name=hypothetical protein
1508133	-3.93174	2.03868e-126	product_name=Mps1 MAPK|Protein kinase-like domain-containing protein
1451532	-3.93104	3.49974e-75	product_name=MFS transporter-like protein
1480816	-3.93059	3.73434e-115	product_name=hypothetical protein
1482805	-3.93055	7.37111e-12	product_name=hypothetical protein
1518022	-3.93035	1.20646e-171	product_name=Neutral/alkaline nonlysosomal ceramidase
1540419	-3.9237	5.2814e-88	product_name=branched-chain alpha-ketoacid dehydrogenase
1507700	-3.92135	3.38537e-07	product_name=expressed protein
1495417	-3.91953	7.27068e-11	product_name=hypothetical protein
1557467	-3.91951	2.24475e-20	product_name=hypothetical protein
1557504	-3.91929	1.74876e-54	product_name=quinon protein alcohol dehydrogenase-like superfamily
1526741	-3.91404	3.53027e-24	product_name=expressed protein
1410938	-3.91033	1.27158e-26	product_name=hypothetical protein
1535063	-3.90918	6.17036e-57	product_name=hypothetical protein
1029479	-3.9078	2.10154e-62	product_name=hypothetical protein
1507384	-3.90725	4.86599e-56	product_name=Protein of unknown function (DUF1688)-domain containing protein
1496896	-3.90412	6.47973e-13	product_name=expressed protein
1372529	-3.9032	2.62247e-10	product_name=hypothetical protein
1450769	-3.90314	2.92269e-36	product_name=expressed protein
1515892	-3.89913	8.45758e-109	product_name=hypothetical protein
1084554	-3.89476	1.43404e-63	product_name=hypothetical protein
1350971	-3.89333	6.8422e-44	product_name=hypothetical protein
1532976	-3.88913	2.54739e-50	product_name=hypothetical protein
1514465	-3.8875	2.38748e-17	product_name=periplasmic binding protein-like I
1536009	-3.88739	5.41106e-11	product_name=Alpha/Beta hydrolase protein
1128859	-3.88506	0.00278234	product_name=hypothetical protein
1592193	-3.88226	1.28378e-93	product_name=GDSL-like Lipase/Acylhydrolase-domain containing protein
1453634	-3.88214	2.99052e-41	product_name=P-loop containing nucleoside triphosphate hydrolase protein
1457700	-3.88133	3.0008e-91	product_name=Protein kinase-like domain-containing protein
1042034	-3.88037	2.71287e-10	product_name=expressed protein
1559527	-3.87949	1.74535e-34	product_name=hypothetical protein
1537784	-3.87884	7.7264e-60	product_name=hypothetical protein
1475329	-3.87816	1.79688e-29	product_name=Anp1-domain containing protein
1456510	-3.87799	4.85686e-18	product_name=Protein of unknown function (DUF962)-domain containing protein
1474387	-3.87765	3.309e-157	product_name=Septin-domain-containing protein
1531362	-3.87624	6.06844e-10	product_name=hypothetical protein
1596995	-3.87569	0.0145435	product_name=hypothetical protein
1569150	-3.87408	0.00431212	product_name=C2H2-type zinc finger transcription factor
1582568	-3.87112	8.43728e-33	product_name=DDHD domain-domain containing protein
1540106	-3.86722	2.71298e-132	product_name=serine/threonine protein kinase|serine/threonine protein kinase%2C CMGC family%2C glycogen synthase kinase
1443869	-3.86643	6.92475e-127	product_name=SMAD/FHA domain-containing protein
1446621	-3.86466	3.6055e-46	product_name=chitin synthase
1598510	-3.86222	2.32983e-95	product_name=Ammonium transporter AmtB-like domain-containing protein
1490728	-3.85889	8.29548e-21	product_name=expressed protein
1503128	-3.85879	5.61763e-66	product_name=Domain of unknown function in PX-proteins (DUF3818)-domain containing protein
1392687	-3.85874	1.7242e-24	product_name=GDSL lipase/esterase
1548034	-3.85463	1.0035e-13	product_name=hypothetical protein
1499595	-3.85406	2.788e-123	product_name=Isocitrate lyase
1459389	-3.85389	1.02647e-17	product_name=hypothetical protein
1523307	-3.85097	1.23386e-102	product_name=Zn(2)-C6 fungal-specific transcription factor|Zn(2)-C6 fungal-specific transcription factor OAD03744.1 Zn(2)-C6 fungal-specific transcription factor
1454398	-3.84807	4.28635e-23	product_name=hypothetical protein
1082620	-3.84634	1.91536e-19	product_name=Sodium:sulfate symporter transmembrane region-domain-containing protein
1562884	-3.84593	9.26646e-62	product_name=hypothetical protein
1379837	-3.83906	7.07563e-12	product_name=CCHC-type zinc finger transcription factor
1030640	-3.83477	7.46969e-21	product_name=Protein of unknown function (DUF3074)-domain containing protein
1578525	-3.82792	6.4755e-18	product_name=hypothetical protein
1532423	-3.82791	3.44115e-94	product_name=WD40-repeat-containing domain protein
1577917	-3.82037	0.00288314	product_name=hypothetical protein
1483544	-3.81545	1.24962e-125	product_name=ClpP/crotonase-like domain-containing protein
1454129	-3.81477	5.63104e-28	product_name=hypothetical protein
1586495	-3.81232	0.00307755	product_name=ribosomal protein S2%2C flavodoxin-like domain-containing protein
1529614	-3.80105	2.4721e-104	product_name=hypothetical protein
1354959	-3.80077	1.48896e-11	product_name=hypothetical protein
1448693	-3.79994	2.03174e-131	product_name=hypothetical protein
1360245	-3.79896	3.72594e-08	product_name=C2H2-type zinc finger transcription factor
1467506	-3.79661	1.08132e-57	product_name=hypothetical protein
1485754	-3.79603	1.98562e-10	product_name=hypothetical protein
1364265	-3.79359	3.0561e-100	product_name=hypothetical protein
1529695	-3.79073	4.16295e-122	product_name=Helix-loop-helix DNA-binding domain-containing transcription factor|helix-loop-helix DNA-binding domain-containing transcription factor OAD00329.1 helix-loop-helix DNA-binding domain-containing transcription factor
1551388	-3.79001	4.29807e-65	product_name=F/Y-rich N-terminus-domain containing protein
1468968	-3.78846	7.852e-64	product_name=S-adenosyl-L-methionine-dependent methyltransferase
1447092	-3.78557	6.42215e-16	product_name=hypothetical protein
1557103	-3.78445	7.27476e-122	product_name=hypothetical protein
1337251	-3.78358	2.15535e-19	product_name=hypothetical protein
1560152	-3.78353	8.09638e-08	product_name=hypothetical protein
1561093	-3.78296	0.000462038	product_name=hypothetical protein
1321417	-3.78158	5.54164e-36	product_name=hypothetical protein
1480015	-3.77726	2.41982e-69	product_name=hypothetical protein
1541840	-3.77602	0.000121499	product_name=expressed protein
1487342	-3.77582	1.0866e-31	product_name=hypothetical protein
1509010	-3.77379	5.51545e-209	product_name=Phosphoribosyltransferase-like protein
1511524	-3.77356	1.50275e-176	product_name=gelsolin-like protein 2-like
1579909	-3.77278	0.000981534	product_name=Nucleophile aminohydrolases
1579277	-3.77258	8.59456e-54	product_name=hypothetical protein
1357753	-3.77073	1.15294e-33	product_name=GPR1/FUN34/yaaH family-domain containing protein
1495845	-3.76558	6.53063e-55	product_name=hypothetical protein
1437232	-3.76388	1.85019e-12	product_name=expressed protein
1416449	-3.76303	7.38e-59	product_name=hypothetical protein
1556431	-3.76101	8.11983e-146	product_name=hypothetical protein
1488995	-3.75748	1.71296e-70	product_name=HotDog domain-containing protein
1527911	-3.75746	4.29384e-98	product_name=nickel transporter
1068969	-3.75741	0.000800216	product_name=hypothetical protein
1457466	-3.75715	9.15911e-21	product_name=hypothetical protein
1432453	-3.75671	0.0192049	product_name=hypothetical protein
1593413	-3.75643	2.06055e-22	product_name=skeletal muscle and kidney-enriched inositol phosphatase protein
1527653	-3.75493	8.51304e-206	product_name=hypothetical protein
1141516	-3.75472	7.63241e-69	product_name=Meiotic cell cortex C-terminal pleckstrin homology-domain containing protein
1351749	-3.75295	4.03185e-54	product_name=hypothetical protein
1327707	-3.7517	9.75658e-32	product_name=NADP-dependent oxidoreductase domain-containing protein
1580727	-3.75127	1.42098e-25	product_name=SNF1-related protein kinase
1563396	-3.75091	0.020611	product_name=hypothetical protein
1409218	-3.75028	0.00496409	product_name=hypothetical protein
1533160	-3.74732	7.09036e-12	product_name=Domain of unknown function (DUF4112)-domain containing protein
1508505	-3.74453	3.15395e-59	product_name=hypothetical protein
1521924	-3.7434	4.43658e-37	product_name=glycosyltransferase|Glycosyltransferase Family 49 protein
1595400	-3.74186	4.18841e-21	product_name=hypothetical protein
1542392	-3.7402	1.02447e-08	product_name=hypothetical protein
1413418	-3.73916	3.65559e-13	product_name=hypothetical protein
1440052	-3.73867	1.4753e-05	product_name=hypothetical protein
1441129	-3.7368	1.26352e-08	product_name=MutS domain III-domain containing protein
1515220	-3.73135	1.98504e-16	product_name=ATP-NAD kinase-like domain-containing protein
1553049	-3.73127	1.69222e-92	product_name=hypothetical protein
1568459	-3.72559	0.000111579	product_name=hypothetical protein
1577550	-3.71978	2.86678e-60	product_name=C2H2-type zinc finger transcription factor
1483491	-3.71961	6.74029e-36	product_name=Peptidase family M41-domain containing protein
1379602	-3.71912	2.5048e-06	product_name=hypothetical protein
1581405	-3.71701	6.42044e-32	product_name=hypothetical protein
1177367	-3.71199	1.16023e-72	product_name=hypothetical protein
1357832	-3.70911	6.2884e-12	product_name=aspartic peptidase domain-containing protein
1575591	-3.7087	0.0318819	product_name=hypothetical protein
1475199	-3.70813	6.84223e-10	product_name=hypothetical protein
1583435	-3.70461	2.39861e-133	product_name=hypothetical protein
1569495	-3.70215	0.0071768	product_name=carbohydrate-binding module family 5 protein|Glycoside Hydrolase Family 18 / Carbohydrate-Binding Module Family 5 protein
1437783	-3.70023	0.0218113	product_name=hypothetical protein
1557085	-3.69938	1.95095e-66	product_name=Ras guanine nucleotide exchange factor domain-containing protein
1516818	-3.69904	3.37792e-33	product_name=hypothetical protein
1471531	-3.69878	6.22937e-204	product_name=expressed protein
1507703	-3.69829	3.34452e-66	product_name=fungal-specific transcription factor domain-containing protein
1446347	-3.69633	3.4998e-21	product_name=Aldehyde/histidinol dehydrogenase
1082848	-3.69589	5.65807e-30	product_name=hypothetical protein
1462426	-3.69193	1.48916e-55	product_name=NAD-dependent glycerol-3-phosphate dehydrogenase C-terminus-domain containing protein
1579272	-3.67968	4.09868e-54	product_name=hypothetical protein
1555080	-3.6776	1.89597e-67	product_name=Got1/Sft2-like family-domain containing protein
1510155	-3.67608	2.66205e-25	product_name=S-adenosyl-L-methionine-dependent methyltransferase
1495853	-3.67507	4.2418e-110	product_name=CNH domain-containing protein
1319368	-3.6737	1.75883e-47	product_name=hypothetical protein
1396139	-3.66267	6.82733e-30	product_name=SUR7/PalI family-domain containing protein
1588146	-3.65724	6.92679e-16	product_name=hypothetical protein
1503601	-3.65623	9.59575e-125	product_name=hypothetical protein
1363792	-3.65419	6.64861e-40	product_name=glycoside hydrolase|Glycoside Hydrolase Family 47 protein
1595679	-3.65218	2.2047e-11	product_name=C2H2-type zinc finger transcription factor
1540039	-3.64494	6.56597e-85	product_name=endo-beta-D-1%2C4-glucanase
1457816	-3.64048	1.53603e-67	product_name=Protein of unknown function (DUF3808)-domain containing protein
1568082	-3.63983	3.6102e-13	product_name=C2H2-type zinc finger transcription factor
1495999	-3.63788	1.71019e-116	product_name=Metalloenzyme%2C LuxS/M16 peptidase-like protein
1516580	-3.63716	1.00812e-89	product_name=Domain of unknown function (DUF1771)-domain containing protein
1574255	-3.63281	4.59933e-20	product_name=magnesium transporter NIPA-domain-containing protein
1387352	-3.62978	1.23391e-08	product_name=hypothetical protein
1470620	-3.62926	2.87047e-28	product_name=hypothetical protein
1354679	-3.629	2.7205e-21	product_name=acyl CoA binding protein-domain-containing protein
1521002	-3.62721	3.64864e-50	product_name=hypothetical protein
1529084	-3.62628	7.43044e-75	product_name=hypothetical protein
1490392	-3.62585	1.58745e-113	product_name=hypothetical protein
1325720	-3.62488	1.18543e-85	product_name=glycosyltransferase family 15 protein
1597771	-3.61695	2.36777e-05	product_name=C2H2-type zinc finger transcription factor
1378752	-3.61555	5.4696e-203	product_name=hypothetical protein
1510024	-3.61036	7.05256e-105	product_name=hypothetical protein
1489072	-3.60752	2.78137e-90	product_name=polysaccharide lyase|Polysaccharide Lyase Family 14 protein
1511339	-3.60621	1.65364e-172	product_name=Serine/Threonine kinase|Serine/Threonine kinase CK1
1474304	-3.60403	4.51332e-56	product_name=2-nitropropane dioxygenase
1022826	-3.60037	2.2368e-07	product_name=expressed protein
1518461	-3.5978	7.05556e-132	product_name=nucleoside diphosphate kinase
1447672	-3.5952	2.76669e-32	product_name=beta 1%2C3 glucan synthase
1464209	-3.58438	5.92293e-12	product_name=expressed protein
1042035	-3.58221	2.26641e-08	product_name=expressed protein
1361183	-3.57894	3.19414e-07	product_name=hypothetical protein
1481364	-3.57884	4.37288e-61	product_name=Tim17/Tim22/Tim23/Pmp24 family-domain containing protein
1578296	-3.57781	6.64673e-06	product_name=General substrate transporter
1461009	-3.57767	5.78817e-92	product_name=small G-protein Ras2
1483918	-3.57761	6.16319e-12	product_name=hypothetical protein
1549991	-3.57737	5.79018e-82	product_name=hypothetical protein
1473992	-3.57711	1.59225e-151	product_name=kinase-like domain-containing protein
1487450	-3.57688	1.3257e-08	product_name=hypothetical protein
1473219	-3.57585	1.50054e-179	product_name=kinase-like domain-containing protein
1482714	-3.57454	1.99656e-181	product_name=hypothetical protein
1536697	-3.57377	6.439e-93	product_name=P-loop containing nucleoside triphosphate hydrolase protein
1375680	-3.57273	3.1154e-26	product_name=epressed protein
1059254	-3.5726	1.8939e-14	product_name=hypothetical protein
1505569	-3.57199	9.07152e-61	product_name=Enolase%2C C-terminal TIM barrel domain-domain containing protein
1499004	-3.57002	3.06239e-45	product_name=hypothetical protein
1436628	-3.56986	6.3945e-76	product_name=expressed protein
1393427	-3.56942	4.14713e-90	product_name=major facilitator superfamily domain-containing protein
1463983	-3.56691	7.15971e-08	product_name=hypothetical protein
1520899	-3.56592	1.42369e-96	product_name=GATA-type Zinc finger transcription factor|GATA-type zinc finger transcription factor OAD03497.1 GATA-type zinc finger transcription factor
1342386	-3.5616	3.67928e-193	product_name=Cyclin-like protein
1597088	-3.56058	2.98648e-83	product_name=NADPH-dependent FMN reductase Lot6
1595186	-3.55733	1.86144e-17	product_name=Major facilitator superfamily domain-containing protein
1519912	-3.5545	2.20725e-72	product_name=hypothetical protein
1413078	-3.5516	1.9226e-68	product_name=hypothetical protein
1496978	-3.54847	1.99096e-43	product_name=hypothetical protein
1555308	-3.54587	6.87971e-10	product_name=hypothetical protein
1022486	-3.54481	7.70653e-09	product_name=hypothetical protein
1577141	-3.5429	4.33061e-07	product_name=Homeodomain-like DNA binding domain-containing transcription factor OAD03334.1 Homeodomain-like DNA binding domain-containing transcription factor
1177383	-3.5419	2.8181e-53	product_name=hypothetical protein
1543378	-3.54146	3.81097e-96	product_name=Mitochondrial carrier domain-containing protein
1595218	-3.54011	4.07346e-35	product_name=Sodium/calcium exchanger protein-domain containing protein
1478492	-3.53881	7.8218e-10	product_name=expressed protein
1461193	-3.53699	2.01146e-57	product_name=Rho GTPase activation protein
1493459	-3.53698	4.57426e-39	product_name=hypothetical protein
1462169	-3.53632	7.38359e-113	product_name=hypothetical protein
1574611	-3.53201	0.00958234	product_name=C2H2-type zinc finger transcription factor
1414632	-3.5307	4.99888e-25	product_name=hypothetical protein
1327299	-3.53046	0.000559633	product_name=hypothetical protein
1417919	-3.52986	1.5044e-30	product_name=hypothetical protein
1494781	-3.5281	9.79836e-67	product_name=Alcohol acetyltransferase-domain containing protein
1523678	-3.52527	1.05111e-67	product_name=GPR1/FUN34/yaaH family-domain containing protein
1148843	-3.52472	4.72595e-75	product_name=hypothetical protein
1497566	-3.52226	6.03798e-40	product_name=STE like transcription factor-domain-containing protein
1381006	-3.5135	1.34511e-05	product_name=Sodium:dicarboxylate symporter family-domain containing protein
1526452	-3.50913	0.0397394	product_name=expressed protein
1007498	-3.50804	1.23374e-20	product_name=hypothetical protein
1482860	-3.50586	3.38936e-32	product_name=Protein kinase-like domain-containing protein
1600863	-3.50343	3.83557e-05	product_name=hypothetical protein
1545819	-3.49975	1.14575e-92	product_name=hypothetical protein
1467657	-3.49849	6.2376e-125	product_name=hypothetical protein
1587157	-3.4974	4.21108e-193	product_name=chitin synthase I
1345409	-3.49693	8.84827e-12	product_name=P-loop containing nucleoside triphosphate hydrolase protein
1468907	-3.49223	1.16315e-122	product_name=C2H2-type Zinc finger transcription factor|C2H2-type zinc finger transcription factor OAD00887.1 C2H2-type zinc finger transcription factor
1418025	-3.49055	8.82914e-36	product_name=kinase-like domain-containing protein
1585912	-3.48587	1.09888e-05	product_name=expressed protein
1496327	-3.48498	1.06578e-121	product_name=hypothetical protein
1443898	-3.48327	6.13272e-80	product_name=hypothetical protein
1466557	-3.48046	7.8875e-76	product_name=Pyridoxal phosphate-dependent transferase
1059115	-3.47965	2.27845e-07	product_name=hypothetical protein
1525229	-3.47935	3.12336e-57	product_name=HIT-like domain-containing protein
1139480	-3.47934	7.68439e-25	product_name=hypothetical protein
1468749	-3.47845	5.8043e-75	product_name=Protein-L-isoaspartate(D-aspartate) O-methyltransferase
1512391	-3.47823	1.48319e-20	product_name=Rho GTPase activation protein
1579623	-3.47638	0.00919968	product_name=Homeodomain-like DNA binding domain-containing transcription factor|Homeodomain-like DNA binding domain-containing transcription factor OAD06039.1 Homeodomain-like DNA binding domain-containing transcription factor
1586247	-3.47526	1.86921e-06	product_name=hypothetical protein
1510844	-3.47239	4.68929e-54	product_name=Mitochondrial carrier domain-containing protein
1345902	-3.46897	0.00197479	product_name=hypothetical protein
1486358	-3.46871	2.7289e-58	product_name=hypothetical protein
1443688	-3.46455	1.41786e-31	product_name=hypothetical protein
1457807	-3.46041	3.49621e-69	product_name=Metallo-dependent phosphatase-like protein
1566063	-3.45385	1.44425e-44	product_name=hypothetical protein
1452728	-3.45261	0.00278364	product_name=expressed protein
1495028	-3.44718	3.0996e-57	product_name=Pyridoxal phosphate-dependent transferase
1461192	-3.44581	9.79056e-90	product_name=DHHC palmitoyltransferase-domain containing protein
1443312	-3.44541	4.35925e-14	product_name=P-loop containing nucleoside triphosphate hydrolase protein
1509271	-3.44473	7.79572e-31	product_name=expressed protein
1392067	-3.44376	2.38893e-26	product_name=hypothetical protein
1484021	-3.44153	2.88627e-24	product_name=hypothetical protein
1582517	-3.43989	1.31948e-71	product_name=serum/glucocorticoid regulated kinase 2
1462097	-3.43129	2.68946e-39	product_name=hypothetical protein
1362520	-3.43081	1.2557e-115	product_name=kinase-like domain-containing protein
1591401	-3.42975	5.75692e-56	product_name=G protein beta subunit|G protein beta subunit OAD06917.1 G protein beta subunit
1576877	-3.42929	0.0420315	product_name=C2H2-type Zinc finger transcription factor|C2H2-type zinc finger transcription factor OAD03106.1 C2H2-type zinc finger transcription factor
1128237	-3.42348	2.13903e-08	product_name=hypothetical protein
1536093	-3.42267	1.12717e-23	product_name=hypothetical protein
1586879	-3.42198	1.2355e-28	product_name=glycoside hydrolase family 28 protein
1517499	-3.42049	5.07368e-140	product_name=hypothetical protein
1376167	-3.41968	7.83274e-08	product_name=nmrA domain-containing protein
1102636	-3.4172	2.69645e-11	product_name=hypothetical protein
1501111	-3.41659	1.15216e-115	product_name=hypothetical protein
1591779	-3.41654	0.0155438	product_name=hypothetical protein
1528089	-3.41378	7.04601e-193	product_name=Pyridoxal phosphate-dependent transferase
1467688	-3.41301	1.44681e-81	product_name=kinase-like protein
1455517	-3.40518	0.000677138	product_name=hypothetical protein
1571852	-3.40481	0.0477947	product_name=hypothetical protein
1375710	-3.40126	1.52471e-84	product_name=hypothetical protein
1358140	-3.3937	6.35949e-167	product_name=hypothetical protein
1560228	-3.39332	3.51763e-07	product_name=hypothetical protein
1486525	-3.39026	4.0173e-105	product_name=P-loop containing nucleoside triphosphate hydrolase protein
1506251	-3.38846	1.20135e-39	product_name=carbamoyl-phosphate synthase L chain%2C ATP binding domain-containing protein
1495645	-3.38542	5.57717e-46	product_name=cytochrome P450
1526167	-3.38522	1.66684e-45	product_name=ARF GTPase activating protein
1508089	-3.38443	1.33898e-180	product_name=hypothetical protein
1440283	-3.38093	0.00179203	product_name=hypothetical protein
1321731	-3.38087	0.00571364	product_name=hypothetical protein
1524471	-3.38017	4.1302e-30	product_name=Adenosine deaminase/editase|Regulator of development and secondary metabolism of the velvet family. Similar to VosA
[truncated: 4,325 more rows]

## Sheet: RTvsPM
GeneID	log2(FC)	P-adj
1586879	-7.09183	4.98351e-114	product_name=glycoside hydrolase family 28 protein
1591216	-6.96021	5.56446e-11	product_name=Protein of unknown function (DUF3808)-domain containing protein
1460757	-6.91249	0	product_name=GMC oxidoreductase
1595237	-6.33943	5.46175e-27	product_name=sulfate transporter family-domain-containing protein
1552029	-6.32811	4.03034e-09	product_name=hypothetical protein
1079553	-6.20888	1.02834e-10	product_name=hypothetical protein
1433615	-6.11071	6.03345e-14	product_name=RlpA-like double-psi beta-barrel-protein domain-containing protein-containing protein
1465376	-6.09361	3.67793e-64	product_name=Domain of unkown function (DUF1775)-domain containing protein
1487804	-5.99576	0	product_name=Alkaline-phosphatase-like%2C core domain-containing protein
1351761	-5.94032	4.61171e-08	product_name=hypothetical protein
1521545	-5.93584	0	product_name=ELO family
1457376	-5.82085	3.49173e-22	product_name=hypothetical protein
1465656	-5.78023	0	product_name=Peptidase S8/S53 domain-containing protein
1418051	-5.69431	1.64447e-08	product_name=expressed protein
1549130	-5.53843	0	product_name=hypothetical protein
1381482	-5.5333	1.52711e-68	product_name=Carbohydrate Esterase Family 4 protein|hypothetical protein
1533506	-5.51824	0	product_name=Iron permease FTR1/Fip1/EfeU
1523474	-5.51751	0	product_name=acyl-CoA thioester hydrolase
1533515	-5.46427	0	product_name=Cupredoxin
1475875	-5.41703	9.10733e-185	product_name=Na+ dependent nucleoside transporter C-terminus-domain containing protein
1463003	-5.39573	1.36151e-125	product_name=Phosphoadenosine phosphosulfate reductase family-domain containing protein
1348566	-5.35531	0	product_name=hypothetical protein
1546573	-5.31451	0	product_name=Protein of unknown function (DUF3419)-domain containing protein
1374232	-5.29514	3.98222e-157	product_name=ammonium transporter AmtB-like domain-containing protein
1355184	-5.29058	0	product_name=POT family-domain-containing protein
1342072	-5.20888	3.3933e-06	product_name=hypothetical protein
1530795	-5.17037	6.39111e-301	product_name=GNS1/SUR4 family-domain containing protein
1528790	-5.11739	1.38369e-167	product_name=hypothetical protein
1347388	-5.11638	4.87715e-07	product_name=hypothetical protein
1370017	-5.07096	1.6895e-232	product_name=Carbohydrate-Binding Module Family 13 protein|carbohydrate-binding module family 13 protein OAD07037.1 carbohydrate-binding module family 13 protein
1546790	-5.06506	2.9181e-16	product_name=glycoside hydrolase|Glycoside Hydrolase Family 28 protein
1595680	-5.04651	7.93957e-06	product_name=purine permease protein
1364405	-5.00011	6.95429e-09	product_name=TMEM164 family-domain containing protein
1393427	-4.99444	4.23425e-272	product_name=major facilitator superfamily domain-containing protein
1514465	-4.98929	1.56968e-32	product_name=periplasmic binding protein-like I
1527312	-4.96377	1.6514e-76	product_name=hypothetical protein
1396139	-4.9395	2.1923e-32	product_name=SUR7/PalI family-domain containing protein
1508769	-4.91764	6.01466e-244	product_name=hypothetical protein
1520136	-4.90629	7.74933e-270	product_name=cytochrome P450
1321417	-4.89268	2.89354e-95	product_name=hypothetical protein
1521655	-4.88026	0	product_name=6-phosphogluconate dehydrogenase%2C C-terminal-like protein
1500684	-4.84218	2.29633e-88	product_name=glycosyltransferase|Glycosyltransferase Family 5 protein
1553990	-4.83395	9.47895e-21	product_name=hypothetical protein
1476915	-4.83343	3.12254e-08	product_name=ATP11%2C mitochondrial F1-ATPase|ATP11%2C Mitochondrial F1-ATPase assembly protein
1500340	-4.82178	2.55114e-05	product_name=hypothetical protein
1446176	-4.81623	5.30605e-90	product_name=Ribonucleotide reductase%2C barrel domain-domain containing protein
1476707	-4.81385	0	product_name=Acetyl-CoA carboxylase%2C central region-domain containing protein
1463020	-4.78423	1.48512e-122	product_name=hypothetical protein
1475880	-4.77731	4.30898e-06	product_name=hypothetical protein
1378134	-4.77244	3.47463e-158	product_name=Ribonucleotide reductase%2C small chain-domain containing protein
1455506	-4.76842	1.28753e-103	product_name=hypothetical protein
1455521	-4.76545	4.31066e-296	product_name=Glucose-6-phosphate dehydrogenase%2C C-terminal domain-domain containing protein
1601554	-4.73963	5.76649e-14	product_name=Domain of unknown function DUF221-domain containing protein
1511327	-4.73081	1.53986e-76	product_name=hypothetical protein
1370995	-4.72593	8.55737e-14	product_name=Amino acid permease/ SLC12A domain-containing protein
1515040	-4.71116	0	product_name=hypothetical protein
1527270	-4.70052	6.99321e-167	product_name=hypothetical protein
1349367	-4.6952	1.91744e-139	product_name=phospholipid-transporting ATPase
1461049	-4.69463	1.3771e-49	product_name=Thioredoxin-like fold
1536371	-4.67461	0	product_name=Phosphoesterase family-domain containing protein
1477165	-4.65217	6.92206e-197	product_name=p53-like transcription factor|p53-like transcription factor OAD07988.1 p53-like transcription factor
1365458	-4.64082	2.53527e-26	product_name=signal transducer
1368475	-4.62995	1.16424e-141	product_name=P-loop containing nucleoside triphosphate hydrolase protein
1590358	-4.61822	6.18663e-15	product_name=hypothetical protein
1473419	-4.60233	6.35215e-108	product_name=hypothetical protein
1466174	-4.5948	0	product_name=pyruvate kinase
1550163	-4.58087	0	product_name=Metallo-dependent phosphatase-like protein
1515926	-4.58017	0	product_name=phosphoesterase family-domain-containing protein
1556613	-4.56346	0	product_name=hypothetical protein
1374151	-4.56025	3.88449e-65	product_name=hypothetical protein
1372594	-4.55615	2.1107e-60	product_name=Ribosome biogenesis regulatory protein (RRS1)-domain containing protein
1493274	-4.54492	0	product_name=pyruvate carboxylase
1461324	-4.53239	4.22144e-16	product_name=hypothetical protein
1546453	-4.51444	5.8296e-268	product_name=Peptidase S8/S53 domain-containing protein
1593109	-4.5019	4.23843e-91	product_name=Pescadillo N-terminus-domain containing protein
1447330	-4.48998	1.9887e-77	product_name=Domain of unknown function (DUF3472)-domain containing protein
1524740	-4.48363	4.58463e-07	product_name=hypothetical protein
1592244	-4.46018	6.62597e-84	product_name=mannosyltransferase putative-domain-containing protein
1480121	-4.44839	2.99183e-05	product_name=expressed protein
1468170	-4.44572	5.35585e-135	product_name=hypothetical protein
1601631	-4.44464	6.48837e-111	product_name=kinase-like domain-containing protein
1483128	-4.4249	0	product_name=Thiolase%2C N-terminal domain-domain containing protein
1587034	-4.41238	3.75727e-25	product_name=hypothetical protein
1483268	-4.40516	0	product_name=chitin synthase
1353013	-4.40443	4.09931e-05	product_name=hypothetical protein
1476147	-4.40261	0	product_name=hypothetical protein
1557627	-4.38386	0	product_name=major facilitator superfamily domain-containing protein
1587213	-4.3815	3.95781e-143	product_name=hypothetical protein
1485652	-4.37707	1.25452e-140	product_name=Oxidative stress survival%2C Svf1-like protein
1595795	-4.37545	3.17045e-94	product_name=Transmembrane amino acid transporter protein-domain containing protein
1500193	-4.3733	6.24944e-47	product_name=hypothetical protein
1484175	-4.36925	4.4598e-276	product_name=Distantly related to plant expansins|RlpA-like double-psi beta-barrel-containing protein domain-containing protein
1584834	-4.35985	0	product_name=Cys/Met metabolism PLP-dependent enzyme-domain containing protein
1455299	-4.34946	0	product_name=Eukaryotic elongation factor 5A hypusine%2C DNA-binding OB fold-domain containing protein
1583595	-4.3487	1.1732e-31	product_name=hypothetical protein
1451144	-4.34487	1.21698e-146	product_name=hypothetical protein
1466382	-4.34325	1.37783e-06	product_name=hypothetical protein
1395857	-4.33534	8.56243e-21	product_name=hypothetical protein
1486358	-4.32734	2.3651e-122	product_name=hypothetical protein
1510886	-4.32566	8.90226e-188	product_name=S-adenosyl-L-methionine-dependent methyltransferase
1519911	-4.3195	1.80814e-23	product_name=glycosyltransferase family 4 protein
1485862	-4.30221	2.25334e-20	product_name=ELO family
1369466	-4.28649	2.18986e-80	product_name=hypothetical protein
1548471	-4.28629	2.37806e-224	product_name=glycine dehydrogenase
1598510	-4.28569	1.06884e-173	product_name=Ammonium transporter AmtB-like domain-containing protein
1373480	-4.28107	8.03854e-62	product_name=hypothetical protein
1586347	-4.27525	8.20777e-11	product_name=hypothetical protein
1543406	-4.27431	6.50316e-41	product_name=glycosyltransferase family 49 protein
1497955	-4.27081	3.8121e-23	product_name=expressed protein
1468748	-4.26183	7.45576e-08	product_name=hypothetical protein
1434564	-4.25831	8.20911e-14	product_name=expressed protein
1474008	-4.25799	0	product_name=hypothetical protein
1358824	-4.24607	2.05448e-16	product_name=guanine nucleotide binding protein
1452401	-4.24587	3.20486e-44	product_name=Regulator of development and secondary metabolism of the velvet family. Similar to VosA|Velvet factor-domain containing protein
1482579	-4.24211	2.50263e-56	product_name=u3 small nucleolar RNA-associated protein
1448109	-4.23805	1.00191e-44	product_name=ribosomal L28e protein family-domain-containing protein
1389679	-4.23617	1.30633e-94	product_name=hypothetical protein
1514924	-4.23559	2.87464e-06	product_name=hypothetical protein
1598711	-4.22973	0	product_name=chitin deacetylase
1475433	-4.22083	4.22908e-15	product_name=hypothetical protein
1599283	-4.21573	5.12701e-21	product_name=hypothetical protein
1474507	-4.20258	1.80441e-223	product_name=CAP domain-containing protein
1522906	-4.19971	4.71354e-66	product_name=Septin-type guanine nucleotide-binding (G) domain-containing protein
1351920	-4.17737	5.3431e-19	product_name=hypothetical protein
1380419	-4.17372	0.000493933	product_name=hypothetical protein
1334309	-4.17149	0.00049202	product_name=Phosphate transporter
1481290	-4.16884	8.74591e-12	product_name=hypothetical protein
1518461	-4.16138	0	product_name=nucleoside diphosphate kinase
1475897	-4.15378	8.90681e-242	product_name=NADP-dependent oxidoreductase domain-containing protein
1547057	-4.1494	0.000556425	product_name=hypothetical protein
1523822	-4.14866	6.81063e-69	product_name=Ribosomal protein L1p/L10e family-domain containing protein
1473620	-4.14785	3.16727e-179	product_name=Distantly related to plant expansins|RlpA-like double-psi beta-barrel-containing protein domain-containing protein
1489956	-4.13285	0	product_name=Phosphoribosylglycinamide synthetase%2C ATP-grasp %28A%29 domain-domain containing protein
1591260	-4.12803	0.00059752	product_name=BTB/POZ protein
1031119	-4.12359	1.21594e-30	product_name=expressed protein
1539681	-4.1234	0	product_name=lipase
1456020	-4.11487	2.13136e-279	product_name=hypothetical protein
1474578	-4.11452	0	product_name=thiamine diphosphate-binding protein
1378586	-4.11172	1.32521e-201	product_name=hypothetical protein
1450974	-4.06446	1.02026e-05	product_name=transcription factor Opi1-domain-containing protein
1478934	-4.0599	9.66123e-06	product_name=hypothetical protein
1512902	-4.05335	0	product_name=hypothetical protein
1532410	-4.05057	0.000242285	product_name=chitinase 1
1540039	-4.04845	1.10896e-81	product_name=endo-beta-D-1%2C4-glucanase
1538871	-4.04166	1.1345e-13	product_name=Small GTPase superfamily
1370696	-4.03755	1.43951e-92	product_name=hypothetical protein
1511347	-4.01944	1.18378e-23	product_name=Chromatin assembly factor 1 subunit A-domain containing protein
1376907	-4.01855	3.54661e-115	product_name=hypothetical protein
1471963	-4.01478	0	product_name=IucA / IucC family-domain containing protein
1541943	-4.01427	0	product_name=Fatty acid desaturase-domain containing protein
1516580	-4.01356	2.61888e-130	product_name=Domain of unknown function (DUF1771)-domain containing protein
1525012	-4.01293	0	product_name=Citrate synthase-like protein
1451656	-4.00892	6.05966e-55	product_name=Brix domain-domain containing protein
1584681	-4.00768	0.00102429	product_name=expressed protein
1528810	-4.00685	1.04099e-81	product_name=hypothetical protein
1515041	-3.99603	0	product_name=glycosyltransferase family 35 protein
1468849	-3.99291	0	product_name=citrate synthase
1475395	-3.99281	0	product_name=Glutamine synthetase type III N terminal-domain containing protein
1587078	-3.99114	2.24909e-36	product_name=Small acidic protein family-domain containing protein
1386462	-3.99069	6.07761e-90	product_name=hypothetical protein
1468448	-3.98815	8.05013e-81	product_name=NAD-dependent glycerol-3-phosphate dehydrogenase N-terminus-domain containing protein
1486117	-3.98204	1.5851e-25	product_name=hypothetical protein
1542417	-3.98116	4.32004e-72	product_name=WD40-repeat-containing domain protein
1353435	-3.98087	2.17751e-84	product_name=Bacterial low temperature requirement A protein (LtrA)-domain containing protein
1442309	-3.9773	2.38169e-09	product_name=hypothetical protein
1496222	-3.97457	8.85979e-69	product_name=Ribosomal protein L10-domain containing protein
1542407	-3.97359	2.78106e-11	product_name=hypothetical protein
1458012	-3.97237	2.8538e-48	product_name=WD40-repeat-containing domain protein
1540750	-3.97171	0	product_name=phosphate:H+ symporter
1594914	-3.96271	2.77341e-52	product_name=hypothetical protein
1343272	-3.9595	8.0737e-30	product_name=hypothetical protein
1505132	-3.95332	0	product_name=Sulfate adenylyltransferase
1534357	-3.95305	0.00123404	product_name=expressed protein
1514476	-3.94946	2.38304e-68	product_name=hypothetical protein
1350034	-3.943	5.27972e-41	product_name=mitochondrial carrier domain-containing protein
1510693	-3.94137	3.51798e-144	product_name=Retinoic acid induced 16-like protein-domain containing protein
1485878	-3.93997	0	product_name=hypothetical protein
1601487	-3.9399	2.96207e-15	product_name=S-adenosyl-L-methionine-dependent methyltransferase
1460646	-3.93981	3.35553e-40	product_name=p53-like transcription factor
1499570	-3.93764	1.07069e-155	product_name=Protein of unknown function (DUF3808)-domain containing protein
1463710	-3.93482	2.8735e-204	product_name=ras guanine nucleotide exchange factor domain-containing protein
1363019	-3.92844	2.03822e-292	product_name=hypothetical protein
1376525	-3.92629	0	product_name=Heat shock protein 70 family
1495028	-3.92219	1.00601e-85	product_name=Pyridoxal phosphate-dependent transferase
1460297	-3.91914	0	product_name=Protein of unknown function (DUF3759)-domain containing protein
1390474	-3.91485	2.42505e-172	product_name=cytochrome P450
1471531	-3.90095	7.48251e-77	product_name=expressed protein
1498841	-3.89724	0	product_name=hypothetical protein
1449029	-3.88488	1.26981e-115	product_name=hypothetical protein
1489314	-3.88466	5.92425e-75	product_name=Transmembrane amino acid transporter protein-domain containing protein
1357493	-3.88227	6.82143e-17	product_name=hypothetical protein
1527940	-3.88211	0	product_name=glycoside hydrolase|Glycoside Hydrolase Family 37 protein
1599552	-3.88092	2.12584e-21	product_name=Poly(A) polymerase central domain-containing protein
1482707	-3.87879	6.62129e-24	product_name=Sodium:solute symporter family-domain containing protein
1382617	-3.87668	0.00165391	product_name=Carotenoid oxygenase
1569260	-3.8667	1.91481e-35	product_name=hypothetical protein
1506753	-3.86361	4.48702e-132	product_name=Ubiquinol-cytochrome c reductase core subunit 10 QCR10|Ubiquinol-cytochrome-c reductase complex subunit (QCR10)-domain containing protein
1433212	-3.85725	0.00170365	product_name=hypothetical protein
1545262	-3.85519	2.30985e-42	product_name=Ras family-domain containing protein
1453071	-3.84975	1.3566e-108	product_name=Endonuclease/exonuclease/phosphatase
1451517	-3.84844	7.34884e-60	product_name=Bestrophin%2C RFP-TM%2C chloride channel-domain containing protein
1369688	-3.84551	0	product_name=GDP-mannose 4%2C6 dehydratase
1531807	-3.83964	2.38574e-06	product_name=S-adenosyl-L-methionine-dependent methyltransferase
1502239	-3.82007	2.959e-32	product_name=WD40-repeat-containing domain protein
1333955	-3.81995	0	product_name=Ser-Thr-rich glycosyl-phosphatidyl-inositol-anchored membrane family-domain-containing protein
1562935	-3.81713	4.95242e-43	product_name=Protein kinase-like domain-containing protein
1471342	-3.79715	1.40398e-171	product_name=hypothetical protein
1463175	-3.79546	0	product_name=hypothetical protein
1507244	-3.79198	6.82456e-33	product_name=S-adenosyl-L-methionine-dependent methyltransferase
1433625	-3.79156	0.00247078	product_name=expressed protein
1525938	-3.7903	8.70508e-184	product_name=Cytochrome P450
1520598	-3.78937	0	product_name=H+-transporting ATPase
1464674	-3.78359	3.64093e-225	product_name=hypothetical protein
1526608	-3.77836	1.25893e-42	product_name=Fungal specific transcription factor|fungal-specific transcription factor OAD00656.1 fungal-specific transcription factor
1502506	-3.77806	1.16549e-96	product_name=hypothetical protein
1366700	-3.7775	3.55329e-162	product_name=hypothetical protein
1470240	-3.77575	1.1758e-51	product_name=P-loop containing nucleoside triphosphate hydrolase protein
1518039	-3.77327	7.10998e-105	product_name=RNA polymerase Rpb6
1465892	-3.77265	7.85565e-16	product_name=hypothetical protein
1356832	-3.77088	0	product_name=ERG6 Delta(24)-sterol C-methyltransferase
1539712	-3.76491	6.62668e-30	product_name=P-loop containing nucleoside triphosphate hydrolase protein
1461684	-3.75905	5.72542e-18	product_name=hypothetical protein
1380646	-3.75799	0.00249453	product_name=carbohydrate esterase|Carbohydrate Esterase Family 4 protein
1465397	-3.75597	0	product_name=Cytidine deaminase-like protein
1388848	-3.74967	1.26576e-165	product_name=Homocysteine S-methyltransferase
1552005	-3.74854	1.01634e-57	product_name=V-type ATPase%2C V0 complex%2C 116kDa subunit family
1460957	-3.74809	8.20229e-72	product_name=P-loop containing nucleoside triphosphate hydrolase protein
1450353	-3.74775	1.00574e-51	product_name=hypothetical protein
1396611	-3.73932	3.43773e-67	product_name=60S ribosomal protein L7-like protein
1509711	-3.73899	1.70055e-60	product_name=potassium/sodium efflux P-type ATPase
1360381	-3.72278	1.35426e-127	product_name=Tryptophan synthase beta subunit-like PLP-dependent enzyme
1480340	-3.71624	4.51468e-56	product_name=TLC domain-domain containing protein
1465858	-3.7144	4.87047e-51	product_name=WD40-repeat-containing domain protein
1446167	-3.71114	0.000100004	product_name=hypothetical protein
1509912	-3.70973	2.38734e-82	product_name=Phosphate transporter
1532248	-3.70376	3.26039e-121	product_name=hypothetical protein
1515225	-3.70157	3.69233e-33	product_name=dimethyladenosine transferase
1507170	-3.696	0	product_name=hypothetical protein
1517295	-3.6894	3.28339e-48	product_name=hypothetical protein
1334985	-3.67661	7.87078e-09	product_name=hypothetical protein
1347525	-3.67631	3.09148e-66	product_name=NMD3 family-domain containing protein
1527832	-3.67067	8.80011e-37	product_name=hypothetical protein
1467353	-3.67037	0.0033803	product_name=hypothetical protein
1376789	-3.66734	1.01948e-240	product_name=Armadillo-type fold
1353183	-3.6665	1.58378e-95	product_name=Pyrimidine 5'-nucleotidase
1376229	-3.66262	7.30076e-34	product_name=kinase-like domain-containing protein
1058846	-3.65172	1.78499e-22	product_name=hypothetical protein
1488461	-3.64921	9.20259e-85	product_name=hypothetical protein
1588774	-3.64143	5.02844e-106	product_name=hypothetical protein
1464015	-3.64117	1.07337e-134	product_name=hypothetical protein
1479947	-3.6385	0.00160782	product_name=hypothetical protein
1453374	-3.63725	4.05426e-53	product_name=Armadillo-type fold
1488677	-3.63585	4.92805e-144	product_name=Tetraspanin family-domain-containing protein
1484004	-3.63467	1.16163e-25	product_name=hypothetical protein
1505093	-3.63437	0	product_name=hypothetical protein
1499263	-3.63377	4.91265e-202	product_name=hypothetical protein
1441129	-3.63262	1.52898e-05	product_name=MutS domain III-domain containing protein
1520255	-3.62207	1.76577e-151	product_name=Ras-like protein 1
1553141	-3.61011	2.68985e-19	product_name=expressed protein
1504408	-3.60921	0	product_name=ATP synthase|ATP synthase F0 subcomplex subunit B ATP4
1390055	-3.60716	4.77408e-92	product_name=surfeit locus protein 6-domain-containing protein
1490880	-3.60236	1.70386e-176	product_name=hypothetical protein
1358140	-3.60183	0	product_name=hypothetical protein
1371914	-3.60099	1.31789e-115	product_name=p53-like transcription factor|p53-like transcription factor OAD00723.1 p53-like transcription factor
1549604	-3.59734	9.01003e-305	product_name=Transketolase%2C thiamine diphosphate binding domain-domain containing protein
1362444	-3.59624	2.44033e-166	product_name=ARM repeat-containing protein
1499260	-3.59362	3.41774e-10	product_name=CCCH-type Zinc finger transcription factor|hypothetical protein
1472378	-3.59249	1.00588e-154	product_name=Serine dehydratase alpha chain-domain containing protein
1541263	-3.58959	0.00181005	product_name=chitin synthase
1346383	-3.58758	4.64454e-44	product_name=Mitochondrial carrier domain-containing protein
1351166	-3.58615	3.61661e-33	product_name=hypothetical protein
1372134	-3.58359	4.22029e-08	product_name=DTW domain-domain containing protein
1521190	-3.58047	2.45058e-149	product_name=hypothetical protein
1371288	-3.57458	4.16999e-154	product_name=hypothetical protein
1584148	-3.57444	3.80681e-08	product_name=Alkaline-phosphatase-like%2C core domain-containing protein
1164248	-3.57239	0.00473103	product_name=vacuolar serine protease Isp6
1506074	-3.57039	6.97057e-19	product_name=hypothetical protein
1468263	-3.56646	4.82448e-08	product_name=hypothetical protein
1518294	-3.56485	1.87537e-23	product_name=S-adenosyl-L-methionine-dependent methyltransferase
1498476	-3.56351	2.28382e-45	product_name=CRAL-TRIO domain-containing protein
1335846	-3.56029	6.83775e-200	product_name=ankyrin repeat-containing domain protein
1451834	-3.56028	2.22264e-102	product_name=hypothetical protein
1152014	-3.55969	7.0402e-16	product_name=Protein of unknown function (DUF2416)-domain containing protein
1495537	-3.55942	4.41538e-09	product_name=CP2 transcription factor-domain-containing protein
1369521	-3.55782	4.36489e-167	product_name=hypothetical protein
1365180	-3.55695	1.06506e-29	product_name=hypothetical protein
1508822	-3.555	0	product_name=hypothetical protein
1545013	-3.55163	0	product_name=lipase
1365294	-3.54854	0.00525318	product_name=MFS transporter
1582869	-3.54731	8.57008e-81	product_name=rab-GTPase-TBC domain-containing protein
1552014	-3.54651	2.36384e-132	product_name=hypothetical protein
1488761	-3.53605	0	product_name=C2 domain-containing protein
1554083	-3.53314	0	product_name=hypothetical protein
1484843	-3.52736	1.69503e-256	product_name=ERG2/sigma1 receptor-like protein
1455227	-3.52353	3.82993e-28	product_name=kinase-like domain-containing protein
1477137	-3.52128	0	product_name=histone H3 ORX47001.1 histone H3 ORX51878.1 histone H3
1480015	-3.51815	9.92852e-63	product_name=hypothetical protein
1474926	-3.5135	2.67419e-24	product_name=hypothetical protein
1524941	-3.51311	7.55452e-95	product_name=NUC169 domain-containing protein
1456043	-3.50932	7.67197e-08	product_name=potassium:hydrogen antiporter protein
1472060	-3.50589	0	product_name=hypothetical protein
1512207	-3.50479	0.00585871	product_name=hypothetical protein
1527721	-3.50358	6.66118e-146	product_name=P-loop containing nucleoside triphosphate hydrolase protein
1586244	-3.50307	1.27809e-09	product_name=hypothetical protein
1502735	-3.50112	1.04475e-37	product_name=DEAD-domain-containing protein
1551476	-3.5011	0	product_name=Major facilitator superfamily domain-containing protein
1364327	-3.49815	8.03469e-103	product_name=chitin synthase
1446329	-3.49495	3.00403e-212	product_name=ABC-2 type transporter-domain-containing protein
1516079	-3.49119	2.37501e-30	product_name=hypothetical protein
1325012	-3.49059	0.00621496	product_name=hypothetical protein
1452738	-3.4868	0.00630078	product_name=hypothetical protein
1448500	-3.48551	3.69169e-20	product_name=riboflavin aldehydeforming enzyme
1526638	-3.48442	4.32533e-80	product_name=H+/nucleoside cotransporter
1452228	-3.47529	2.64838e-10	product_name=Domain of unknown function DUF221-domain containing protein
1369983	-3.47097	4.8527e-20	product_name=hypothetical protein
1480819	-3.4702	0	product_name=VTC domain-containing protein
1360264	-3.46948	2.81295e-25	product_name=hypothetical protein
1545026	-3.46931	0.000420487	product_name=HAD-like domain-containing protein
1524571	-3.46446	1.7619e-32	product_name=C2H2-type Zinc finger transcription factor|C2H2-type zinc finger transcription factor OAD03879.1 C2H2-type zinc finger transcription factor
1533237	-3.46332	3.87896e-54	product_name=hypothetical protein
1337482	-3.46148	2.97428e-43	product_name=Metallo-dependent phosphatase-like protein
1373264	-3.45957	3.10179e-63	product_name=Ribosomal protein S5 domain 2-type fold
1517042	-3.45936	5.58251e-148	product_name=hypothetical protein
1543918	-3.45257	3.00213e-09	product_name=fungal protein
1378526	-3.45091	4.90738e-13	product_name=hypothetical protein
1487973	-3.44761	1.10941e-06	product_name=hypothetical protein
1587789	-3.4459	2.11429e-37	product_name=hypothetical protein
1509401	-3.44346	4.01694e-279	product_name=hypothetical protein
1358871	-3.44079	7.00966e-09	product_name=hypothetical protein
1466398	-3.43885	5.24805e-48	product_name=Bestrophin%2C RFP-TM%2C chloride channel-domain-containing protein
1476013	-3.43744	4.9345e-44	product_name=hypothetical protein
1548348	-3.43607	2.75381e-09	product_name=RGS domain-containing protein
1544499	-3.43016	1.64026e-156	product_name=Ammonium transporter AmtB-like domain-containing protein
1555889	-3.42567	0	product_name=Hydroxymethylglutaryl-coenzyme A synthase C terminal-domain containing protein
1465738	-3.42565	2.65227e-43	product_name=rRNA processing protein Ebp2
1460003	-3.42285	0	product_name=ATP synthase|ATP synthase F1 subcomplex alpha subunit ATP1
1591901	-3.4216	1.87289e-233	product_name=hypothetical protein
1519794	-3.41294	0	product_name=ATP synthase F1 subcomplex gamma subunit ATP3
1527911	-3.4091	6.74395e-17	product_name=nickel transporter
1476918	-3.40867	1.02618e-12	product_name=hypothetical protein
1378572	-3.40494	2.56275e-08	product_name=p53-like transcription factor|p53-like transcription factor OAC99448.1 p53-like transcription factor
1347018	-3.40183	9.80581e-103	product_name=Dihydroxy-acid/6-phosphogluconate dehydratase
1458152	-3.39942	3.45542e-49	product_name=Ribosomal protein L24e-domain containing protein
1508444	-3.39919	1.35795e-123	product_name=hypothetical protein
1592582	-3.39605	2.95741e-51	product_name=Rix1 complex component
1350200	-3.38855	1.23877e-31	product_name=cellular morphogenesis protein
1458607	-3.38761	1.6019e-99	product_name=hypothetical protein
1482264	-3.38623	1.1387e-27	product_name=C2H2-type Zinc finger transcription factor|C2H2-type zinc finger transcription factor OAC99487.1 C2H2-type zinc finger transcription factor
1500038	-3.38579	3.40429e-79	product_name=Carbonic anhydrase
1507809	-3.3854	4.86063e-102	product_name=hypothetical protein
1366376	-3.38502	6.06411e-18	product_name=Cyclin|hypothetical protein
1499341	-3.38304	0	product_name=S-adenosylmethionine synthase
1443910	-3.37975	0	product_name=hypothetical protein
1513802	-3.37911	2.36759e-35	product_name=peptidase S8/S53 domain-containing protein
1528630	-3.37491	1.30597e-52	product_name=Armadillo-type fold
1524425	-3.36676	2.25351e-26	product_name=nuclease domain-containing protein
1537960	-3.35401	1.16006e-103	product_name=hypothetical protein
1593265	-3.35334	0.0104402	product_name=Protoglobin-domain containing protein
1508281	-3.35193	1.26215e-273	product_name=ABC-2 type transporter-domain-containing protein
1105922	-3.35133	1.98909e-06	product_name=expressed protein
1528697	-3.34948	4.01967e-197	product_name=hypothetical protein
1518363	-3.34898	0	product_name=major facilitator superfamily domain-containing protein
1556858	-3.34768	4.6636e-50	product_name=hypothetical protein
1548700	-3.34603	5.45788e-116	product_name=hypothetical protein
1522160	-3.34312	1.9934e-37	product_name=hypothetical protein
1535656	-3.33961	0	product_name=Protein of unknown function (DUF3759)-domain containing protein
1531718	-3.33731	4.3509e-19	product_name=Dbl homology domain-containing protein
1473385	-3.33663	1.51439e-42	product_name=Dynein light intermediate chain (DLIC)-domain containing protein
1508554	-3.33516	2.75509e-24	product_name=Domain of unknown function (DUF4203)-domain containing protein
1385035	-3.33381	9.45591e-16	product_name=hypothetical protein
1536916	-3.32921	1.08274e-22	product_name=hypothetical protein
1571983	-3.32634	0.0107263	product_name=hypothetical protein
1478500	-3.32319	1.27182e-53	product_name=nucleolar complex protein
1467350	-3.32191	9.27606e-45	product_name=hypothetical protein
1507127	-3.32059	5.8743e-52	product_name=WD40-repeat-containing domain protein
1387974	-3.3194	1.06801e-40	product_name=helix-loop-helix DNA-binding domain-containing protein
1505679	-3.31684	1.85361e-24	product_name=DHHC palmitoyltransferase-domain-containing protein
1537817	-3.31254	1.68712e-192	product_name=PAK family of Ser/Thr protein kinase
1352308	-3.31221	0.00102614	product_name=hypothetical protein
1472258	-3.31116	5.82268e-225	product_name=Septin-domain containing protein
1484069	-3.31115	3.26211e-28	product_name=Ribosomal protein S8e/ribosomal biogenesis NSA2
1366693	-3.31001	1.04495e-222	product_name=6-phosphogluconate dehydrogenase
1372420	-3.30677	1.97603e-130	product_name=adenylyl-sulfate kinase
1522951	-3.30636	7.79054e-110	product_name=hypothetical protein
1392386	-3.30486	6.12815e-11	product_name=GNAT family N-acetyltransferase
1348965	-3.30345	4.91566e-34	product_name=PQ loop repeat-domain containing protein
1552645	-3.30341	1.73587e-36	product_name=hypothetical protein
1526737	-3.29994	0	product_name=hypothetical protein
1383313	-3.29978	1.38105e-127	product_name=hypothetical protein
1467657	-3.29841	2.24909e-147	product_name=hypothetical protein
1497317	-3.29541	5.24023e-69	product_name=hypothetical protein
1495853	-3.29294	3.52355e-94	product_name=CNH domain-containing protein
1533021	-3.28444	9.94662e-172	product_name=Septin-type guanine nucleotide-binding (G) domain-containing protein
1540632	-3.28266	0	product_name=hypothetical protein
1562884	-3.28263	4.37545e-79	product_name=hypothetical protein
1478382	-3.27657	0.00107954	product_name=hypothetical protein
1464285	-3.27569	0	product_name=ATP synthase|ATP synthase F0 subcomplex subunit D ATP7
1590547	-3.27388	3.93306e-33	product_name=ribosome 60S biogenesis N-terminal-domain-containing protein
1474423	-3.2698	8.71075e-26	product_name=Protein of unknown function (DUF1394)-domain containing protein
1328040	-3.26938	0.0123699	product_name=Permease family-domain containing protein
1458586	-3.26827	9.26161e-10	product_name=Rho GTPase activation protein
1553590	-3.26567	1.68995e-38	product_name=Grap2 and cyclin-D-interacting-domain containing protein
1542703	-3.25889	0.0129752	product_name=Isochorismatase-like protein
1319384	-3.25794	5.44499e-44	product_name=hypothetical protein
1465736	-3.25768	2.03435e-14	product_name=hypothetical protein
1489072	-3.2569	0	product_name=polysaccharide lyase|Polysaccharide Lyase Family 14 protein
1480448	-3.25679	7.7286e-210	product_name=hypothetical protein
1349376	-3.25623	1.36151e-30	product_name=Ribosome biogenesis protein Nop16
1545787	-3.256	0.0142486	product_name=expressed protein
1502071	-3.25565	4.90782e-17	product_name=P-loop containing nucleoside triphosphate hydrolase protein
1536224	-3.25325	3.6225e-201	product_name=hypothetical protein
1530915	-3.25185	1.02246e-57	product_name=WD40-repeat-containing domain protein
1448051	-3.24428	2.78441e-07	product_name=hypothetical protein
1596875	-3.24408	8.70227e-77	product_name=hypothetical protein
1535216	-3.24101	0	product_name=Nucleoside diphosphate kinase
1489172	-3.23839	3.91416e-194	product_name=hypothetical protein
1495110	-3.23504	4.80881e-11	product_name=hypothetical protein
1498689	-3.23359	2.85929e-292	product_name=Pyridoxal phosphate-dependent transferase
1486650	-3.23177	3.5661e-144	product_name=hypothetical protein
1391285	-3.22897	9.00244e-199	product_name=50S ribosomal protein L30e-like protein
1496327	-3.22356	6.22887e-209	product_name=hypothetical protein
1430811	-3.22349	0.0138782	product_name=hypothetical protein
1481799	-3.22315	0.00119458	product_name=hypothetical protein
1363165	-3.22296	4.88644e-13	product_name=hypothetical protein
1521924	-3.22128	9.17331e-63	product_name=glycosyltransferase|Glycosyltransferase Family 49 protein
1465138	-3.21941	4.56989e-08	product_name=Dbl homology domain-containing protein
1536314	-3.21471	3.20486e-23	product_name=homeobox domain-containing protein
1523594	-3.21418	4.64791e-107	product_name=hypothetical protein
1465337	-3.21293	0.0144287	product_name=Chitin synthase|chitin synthase-domain-containing protein
1541865	-3.21023	4.6156e-79	product_name=hypothetical protein
1360452	-3.21016	0.00128399	product_name=hypothetical protein
1498481	-3.2091	1.87013e-292	product_name=hypothetical protein
1490470	-3.20763	9.29895e-09	product_name=hypothetical protein
1479643	-3.20589	2.19789e-48	product_name=hypothetical protein
1555071	-3.20291	2.26851e-65	product_name=HOOK-domain-containing protein
1514484	-3.2013	6.26773e-23	product_name=hypothetical protein
1369475	-3.20035	0.00723268	product_name=hypothetical protein
1520899	-3.19764	4.66996e-111	product_name=GATA-type Zinc finger transcription factor|GATA-type zinc finger transcription factor OAD03497.1 GATA-type zinc finger transcription factor
1582818	-3.19741	2.47917e-82	product_name=hypothetical protein
1346969	-3.19737	4.65871e-73	product_name=kinase-like domain-containing protein
1484192	-3.19687	1.32928e-101	product_name=tetratricopeptide repeat protein 39B-like
1590792	-3.18675	1.80653e-29	product_name=Galactose-binding domain-like protein
1459691	-3.18326	4.09561e-171	product_name=FAD dependent oxidoreductase-domain-containing protein
1495676	-3.18091	0	product_name=hypothetical protein
1580414	-3.17966	5.92616e-07	product_name=hypothetical protein
1054703	-3.17786	7.99819e-42	product_name=WD40-repeat-containing domain protein
1527620	-3.17181	1.17388e-301	product_name=Tubulin/FtsZ%2C GTPase domain-containing protein
1503502	-3.17137	3.34171e-40	product_name=Haemolysin-III related-domain containing protein
1595137	-3.16959	6.20272e-169	product_name=Major facilitator superfamily domain-containing protein
1031666	-3.1649	0.0163733	product_name=hypothetical protein
1459153	-3.16353	3.5852e-221	product_name=alternative NADP(H) dehydrogenase
1518983	-3.16164	7.32411e-53	product_name=Ribonuclease H-like domain-containing protein
1598062	-3.15913	1.5229e-21	product_name=Emopamil-binding protein
1515029	-3.15694	3.18441e-96	product_name=WD40-repeat-containing domain protein
1589968	-3.1548	6.16177e-185	product_name=Coproporphyrinogen III oxidase
1501457	-3.15452	1.53124e-16	product_name=HIT-like domain-containing protein
1380357	-3.15209	3.13267e-33	product_name=hypothetical protein
1482436	-3.15149	2.3408e-64	product_name=WD40-repeat-containing domain protein
1518335	-3.14486	1.328e-172	product_name=hypothetical protein
1600632	-3.14331	3.87876e-131	product_name=glycine cleavage system protein T
1395147	-3.14236	5.87493e-30	product_name=WD40-repeat-containing domain protein
1457816	-3.14175	7.80832e-54	product_name=Protein of unknown function (DUF3808)-domain containing protein
1379351	-3.14011	2.95358e-226	product_name=hypothetical protein
1451158	-3.13322	0.00913087	product_name=expressed protein
1448895	-3.13247	3.1858e-19	product_name=ClpP/crotonase-like domain-containing protein
1518532	-3.12429	3.98401e-119	product_name=Phosphoribosyltransferase-like protein
1526624	-3.12366	1.26936e-62	product_name=serine/threonine protein kinase|serine/threonine protein kinase%2C CMGC family%2C glycogen synthase kinase
1469527	-3.12297	0	product_name=ATP synthase|ATP synthase inhibitor protein INH1
1516010	-3.1227	3.67243e-34	product_name=hypothetical protein
1392990	-3.1204	0.000436776	product_name=hypothetical protein
1508449	-3.11195	3.91647e-36	product_name=Sas10/Utp3/C1D family-domain containing protein
1547211	-3.10993	1.31262e-81	product_name=Methylenetetrahydrofolate reductase-domain containing protein
1486008	-3.10118	5.28575e-140	product_name=RHD3/Sey1
1469364	-3.10097	4.88937e-20	product_name=hypothetical protein
1506475	-3.09469	1.13749e-97	product_name=Distantly related to plant expansins|RlpA-like double-psi beta-barrel-containing protein domain-containing protein
1457521	-3.09314	7.08552e-38	product_name=cytochrome P450
1386918	-3.09249	3.29223e-57	product_name=WD40-repeat-containing domain protein
1367889	-3.09097	0.0200251	product_name=hypothetical protein
1493407	-3.08752	1.59366e-94	product_name=hypothetical protein
1474222	-3.0834	0.00281432	product_name=hypothetical protein
1512988	-3.08304	0	product_name=malate dehydrogenase
1364563	-3.08299	9.62666e-184	product_name=cation efflux family-domain-containing protein
1355369	-3.0814	5.11291e-06	product_name=Retinol binding protein receptor-domain containing protein
1462573	-3.07818	0	product_name=Acyl-CoA-binding protein
1480168	-3.07772	3.71275e-27	product_name=NADP-dependent oxidoreductase
1469624	-3.07469	5.02536e-243	product_name=putative 60S ribosomal protein L27A
1467211	-3.07391	0	product_name=hypothetical protein
1542425	-3.06479	1.73846e-35	product_name=GNL3L/Grn1 putative GTPase-domain containing protein
1552253	-3.06439	0	product_name=Histidine phosphatase superfamily
1468184	-3.05924	4.10078e-49	product_name=Alpha/Beta hydrolase protein
1490098	-3.05911	1.82734e-08	product_name=Dbl homology (DH) domain-containing protein
1528290	-3.0563	1.48967e-227	product_name=hypothetical protein
1509123	-3.05241	3.53584e-73	product_name=hypothetical protein
1393315	-3.04678	0.00298425	product_name=cation-transporting ATPase
1555080	-3.04651	3.34308e-30	product_name=Got1/Sft2-like family-domain containing protein
1373618	-3.04456	1.66128e-29	product_name=Pyridoxal phosphate-dependent transferase
1350752	-3.04367	4.71703e-09	product_name=pseudouridine synthase
1527519	-3.04217	2.62675e-06	product_name=amino acid permease-domain-containing protein
1517659	-3.04149	9.90486e-63	product_name=Serine hydrolase FSH
1436628	-3.03922	6.24054e-56	product_name=expressed protein
1489165	-3.03915	1.17689e-105	product_name=hypothetical protein
1512434	-3.03733	0	product_name=hypothetical protein
1556656	-3.03186	1.35347e-64	product_name=P-loop containing nucleoside triphosphate hydrolase protein
1598769	-3.02898	0.0251649	product_name=hypothetical protein
1447337	-3.02874	2.97221e-49	product_name=GATA-binding protein%2C other eukaryote
1523916	-3.02681	1.43541e-196	product_name=PAP2 superfamily C-terminal-domain-containing protein
1537784	-3.02419	3.09238e-23	product_name=hypothetical protein
1477472	-3.02307	0.0137747	product_name=hypothetical protein
1526167	-3.0228	1.54139e-31	product_name=ARF GTPase activating protein
1372563	-3.02261	5.73723e-48	product_name=hypothetical protein
1557646	-3.02224	6.73e-75	product_name=hypothetical protein
1018691	-3.02167	1.08001e-58	product_name=hypothetical protein
1454113	-3.01914	7.19343e-204	product_name=hypothetical protein
1471544	-3.01903	1.60253e-196	product_name=carbohydrate-binding module family 50 protein
1351740	-3.01574	9.55548e-14	product_name=Arsenical pump membrane protein-domain containing protein
1518464	-3.01349	9.29327e-29	product_name=mitochondrial carrier domain-containing protein
1483557	-3.01288	0	product_name=NADH-ubiquinone reductase complex 1 MLRQ subunit-domain-containing protein
1522550	-3.00908	1.83492e-12	product_name=ADP-ribosylation factor-like protein 8B
1536009	-3.00904	4.38818e-05	product_name=Alpha/Beta hydrolase protein
1519360	-3.00854	4.89635e-251	product_name=hypothetical protein
1332793	-3.00812	0.0134535	product_name=ADP-ribosylation factor family-domain containing protein
1540216	-3.00508	1.0111e-60	product_name=Bystin-domain-containing protein
1487345	-3.0049	9.59475e-09	product_name=hypothetical protein
1550825	-3.00146	1.19223e-200	product_name=hypothetical protein
1485486	-2.99532	4.09521e-104	product_name=CTP synthase N-terminus-domain containing protein
1481893	-2.99511	7.81573e-173	product_name=aldehyde dehydrogenase domain-containing protein
1498045	-2.99462	2.71769e-15	product_name=Flavoprotein-like protein
1430967	-2.99385	5.89069e-126	product_name=Ras family-domain containing protein
1451738	-2.98836	1.34336e-38	product_name=hypothetical protein
1509200	-2.98428	1.01623e-143	product_name=hypothetical protein
1523399	-2.98378	7.27372e-35	product_name=Regulator of development and secondary metabolism of the velvet family. Similar to VosA|Velvet factor-domain containing protein
1541792	-2.97966	2.93866e-130	product_name=CTP synthase N-terminus-domain containing protein
1591725	-2.97776	0.0269842	product_name=hypothetical protein
1416449	-2.97751	3.10652e-31	product_name=hypothetical protein
1497952	-2.97536	6.18364e-58	product_name=expressed protein
1487590	-2.97477	2.03725e-145	product_name=hypothetical protein
1469656	-2.97455	1.52031e-73	product_name=hypothetical protein
1455347	-2.97416	1.5252e-191	product_name=IMP dehydrogenase/GMP reductase
1572928	-2.97002	9.99107e-89	product_name=gamma-aminobutyrate permease
1466194	-2.9684	7.84153e-27	product_name=hypothetical protein
1484040	-2.96821	3.77594e-07	product_name=Acyl-CoA N-acyltransferase
1504439	-2.96408	9.40517e-11	product_name=hypothetical protein
1531867	-2.96278	1.88797e-78	product_name=Prefoldin subunit-domain-containing protein
1447092	-2.96268	1.66141e-08	product_name=hypothetical protein
1533575	-2.9626	5.95528e-66	product_name=P-loop containing nucleoside triphosphate hydrolase protein
1468741	-2.96034	4.0279e-09	product_name=HLH-domain-containing basic-leucine zipper (bZIP) transcription factor|HLH-domain-containing basic-leucine zipper transcription factor
1552616	-2.96028	2.66203e-67	product_name=hypothetical protein
1564765	-2.95916	0	product_name=Ribophorin I-domain containing protein
1455797	-2.95675	0.0160386	product_name=P-loop containing nucleoside triphosphate hydrolase protein
1480634	-2.95668	2.05409e-286	product_name=hypothetical protein
1465035	-2.95631	0	product_name=MIR motif
1510155	-2.95399	6.75094e-05	product_name=S-adenosyl-L-methionine-dependent methyltransferase
1383724	-2.95389	2.31588e-18	product_name=kinase-like domain-containing protein
1536446	-2.95386	5.35049e-37	product_name=hypothetical protein
1582758	-2.95327	7.09717e-277	product_name=hypothetical protein
1326529	-2.95306	1.18665e-204	product_name=PLP-dependent transferase
1509260	-2.95284	2.36697e-25	product_name=N-acetylglucosaminyl transferase component-domain-containing protein
1469599	-2.95257	0	product_name=hypothetical protein
1590174	-2.95154	3.88553e-28	product_name=Ribosomal protein L34-domain containing protein
1518758	-2.94981	4.81095e-99	product_name=NUC091 domain-containing protein
1515115	-2.9493	4.12942e-111	product_name=Phospholipase/carboxylesterase/thioesterase
1489737	-2.94493	3.58762e-49	product_name=phospholipid-transporting ATPase
1549880	-2.94469	1.91669e-280	product_name=NADH dehydrogenase|NADH dehydrogenase (ubiquinone) 1 alpha subcomplex subunit 9 NDUFA9
1477945	-2.94394	3.13879e-15	product_name=hypothetical protein
1305257	-2.94023	0.0169504	product_name=expressed protein
1447956	-2.93737	0.00442219	product_name=hypothetical protein
1447774	-2.93649	2.72561e-13	product_name=Thioredoxin-like fold
1063740	-2.93471	0.00136731	product_name=hypothetical protein
1475329	-2.93409	4.57032e-24	product_name=Anp1-domain containing protein
1479095	-2.93244	4.02018e-138	product_name=NADH-ubiquinone reductase complex 1 MLRQ subunit-domain containing protein
1163071	-2.92554	0.0176919	product_name=hypothetical protein
1489895	-2.92106	0	product_name=hypothetical protein
1478086	-2.92064	5.36382e-273	product_name=Glycerophosphoryl diester phosphodiesterase family-domain-containing protein
1544631	-2.91993	1.23328e-22	product_name=hypothetical protein
1496534	-2.91808	9.69158e-125	product_name=FAD-linked oxidoreductase-like protein
1389798	-2.91596	6.38082e-174	product_name=hypothetical protein
1370469	-2.91548	1.47264e-14	product_name=hypothetical protein
1527272	-2.91479	0.00130921	product_name=hypothetical protein
1518395	-2.91412	0	product_name=major facilitator superfamily domain-containing protein
1516586	-2.90958	7.01402e-46	product_name=hypothetical protein
1503002	-2.89982	3.71353e-150	product_name=family 49 glycosyltransferase
1516911	-2.89712	1.12451e-20	product_name=expressed protein
1502125	-2.89653	8.27692e-58	product_name=B-type amino acid transporter 1-like
1484981	-2.89246	0.0190969	product_name=hypothetical protein
1459565	-2.89234	5.39245e-58	product_name=kinase-like domain-containing protein
1477568	-2.89054	3.54542e-93	product_name=OPT oligopeptide transporter protein-domain containing protein
1586608	-2.88986	6.85378e-07	product_name=hypothetical protein
1490733	-2.88745	8.53406e-34	product_name=hypothetical protein
1549723	-2.88507	1.09757e-46	product_name=Phosphoribosyltransferase-like protein
1529873	-2.88476	2.01857e-39	product_name=hypothetical protein
1477157	-2.88454	0	product_name=Histone-fold-containing protein
1537036	-2.88381	7.77925e-15	product_name=hypothetical protein
1497042	-2.8833	1.98324e-13	product_name=cyclophilin
1355982	-2.88279	4.35547e-114	product_name=Orotidine-5'-monophosphate decarboxylase
1582474	-2.88201	5.63005e-253	product_name=hypothetical protein
1496226	-2.88072	2.65633e-19	product_name=kinase-like domain-containing protein
1366113	-2.87795	1.64285e-120	product_name=Fork head domain-domain containing protein
1536011	-2.87094	1.29504e-15	product_name=hypothetical protein
1461395	-2.86991	1.06283e-30	product_name=asparagine synthetase domain-containing protein 1
1578714	-2.86869	0.0015022	product_name=hypothetical protein
1494058	-2.86645	2.11623e-22	product_name=expressed protein
1527021	-2.86261	3.49807e-15	product_name=hypothetical protein
1454092	-2.86198	3.28458e-16	product_name=Up-regulated During Septation-domain containing protein
1395496	-2.85747	3.28949e-107	product_name=hypothetical protein
1391804	-2.85472	0.000496347	product_name=C2H2-type zinc finger transcription factor
1593451	-2.85438	0.0243553	product_name=enoylCoA hydratase/isomerase
1347260	-2.84981	2.67841e-96	product_name=hypothetical protein
1348871	-2.84791	2.64495e-33	product_name=hypothetical protein
1483422	-2.84755	2.29992e-09	product_name=hypothetical protein
1383246	-2.84596	0.000532476	product_name=Zn(2)-C6 fungal-specific transcription factor OAD09137.1 Zn(2)-C6 fungal-specific transcription factor
1503668	-2.84377	0.0385992	product_name=expressed protein
1467427	-2.84217	0	product_name=Helix-loop-helix DNA-binding domain-containing transcription factor|helix-loop-helix DNA-binding domain-containing transcription factor OAD01078.1 helix-loop-helix DNA-binding domain-containing transcription factor
1374824	-2.84119	1.46485e-22	product_name=kinase-like domain-containing protein
1321731	-2.8411	0.0392059	product_name=hypothetical protein
1523452	-2.83779	2.88587e-52	product_name=sulfate transporter family-domain-containing protein
1548854	-2.83615	0.00188318	product_name=hypothetical protein
1540005	-2.83431	1.42595e-243	product_name=Fumarase (Fumarate hydratase)|fumarate hydratase
1445977	-2.82919	3.28361e-84	product_name=Amino acid permease/ SLC12A domain-containing protein
1079491	-2.82804	0.0404987	product_name=VTC domain-domain containing protein
1545357	-2.82804	0.0404987	product_name=hypothetical protein
1456379	-2.82665	1.43197e-96	product_name=hypothetical protein
1483001	-2.82538	0	product_name=ATP synthase|ATP synthase F1 subcomplex alpha subunit ATP1
1488441	-2.82497	3.9551e-12	product_name=peptidase M76
1396454	-2.82458	0	product_name=P-loop containing nucleoside triphosphate hydrolase protein
1453634	-2.82341	2.52304e-14	product_name=P-loop containing nucleoside triphosphate hydrolase protein
1537721	-2.82264	3.09528e-98	product_name=component of IIS longevity pathway SMK-1-domain-containing protein
1595757	-2.81818	3.56489e-215	product_name=hypothetical protein
1555123	-2.81778	0.0025805	product_name=hypothetical protein
1514329	-2.81658	3.7556e-47	product_name=hypothetical protein
1461402	-2.81605	7.79707e-07	product_name=Predicted AdoMet-dependent methyltransferase-domain containing protein
1381926	-2.81604	7.96367e-161	product_name=Class I glutamine amidotransferase-like protein
1601032	-2.8154	0.000187387	product_name=hypothetical protein
1513001	-2.81431	4.22862e-135	product_name=protein phosphatase PP2A0 B subunit gamma isoform
1477953	-2.81145	0	product_name=hypothetical protein
1451026	-2.80726	2.80147e-60	product_name=expressed protein|NADH-ubiquinone oxidoreductase subunit NUVM
1491721	-2.80497	2.26462e-21	product_name=GDP-fucose protein O-fucosyltransferase
1465573	-2.80495	3.24611e-107	product_name=ras-like protein rab
1387399	-2.80204	0.00759659	product_name=hypothetical protein
1493919	-2.80121	9.07037e-107	product_name=Metalloenzyme%2C LuxS/M16 peptidase-like protein
1516339	-2.80026	0.00809397	product_name=fork head domain-containing protein
1548494	-2.79858	2.25335e-16	product_name=S-adenosyl-L-methionine-dependent methyltransferase
1549372	-2.79816	9.3642e-34	product_name=rRNA processing/ribosome biogenesis-domain containing protein
1327071	-2.79511	7.30518e-16	product_name=hypothetical protein
1532048	-2.79363	0	product_name=Ribokinase-like protein
1416378	-2.7908	5.9893e-138	product_name=hypothetical protein
1510157	-2.78664	2.8859e-43	product_name=Mss4-like protein
1557738	-2.78417	1.26397e-12	product_name=hypothetical protein
1381032	-2.78077	2.55838e-10	product_name=General substrate transporter
1493858	-2.77937	3.12109e-83	product_name=hypothetical protein
1449220	-2.77888	5.5759e-84	product_name=Thiamin diphosphate-binding fold
1353746	-2.77545	1.21507e-70	product_name=WD40-repeat-containing domain protein
1534217	-2.77033	3.73741e-35	product_name=hypothetical protein
1482860	-2.76914	7.06408e-29	product_name=Protein kinase-like domain-containing protein
1517002	-2.76868	2.51211e-09	product_name=expressed protein
1504072	-2.76862	2.67732e-14	product_name=hypothetical protein
1522867	-2.76668	6.83568e-242	product_name=CobB/CobQ-like glutamine amidotransferase domain-domain containing protein
1599803	-2.76521	5.25736e-12	product_name=Sodium:dicarboxylate symporter family-domain containing protein
1442409	-2.76305	7.733e-169	product_name=hypothetical protein
1506641	-2.76108	4.37735e-12	product_name=hypothetical protein
1485516	-2.75883	9.19955e-37	product_name=hypothetical protein
1459294	-2.75809	9.02267e-16	product_name=acyltransferase
1596525	-2.75742	2.08292e-67	product_name=DHS-like NAD/FAD-binding domain-containing protein
1547204	-2.75669	5.39508e-17	product_name=S-adenosyl-L-methionine-dependent methyltransferase
1553343	-2.75135	1.12703e-99	product_name=S-adenosyl-L-methionine-dependent methyltransferase
1335829	-2.74862	2.44529e-287	product_name=glycosyltransferase family 2 protein
1471990	-2.74624	1.77648e-13	product_name=PQ loop repeat-domain-containing protein
1384767	-2.74343	8.37811e-65	product_name=hypothetical protein
1523507	-2.74278	3.03838e-205	product_name=Glycine cleavage H-protein-domain containing protein
1551095	-2.74137	1.05129e-13	product_name=hypothetical protein
1373222	-2.73894	1.36844e-227	product_name=glycosyltransferase family 49 protein
1509309	-2.73569	0	product_name=FAD binding domain-containing protein
1514380	-2.73536	2.86097e-49	product_name=Tryptophan synthase beta subunit-like PLP-dependent enzyme
1457883	-2.73144	2.64575e-77	product_name=Blue light photoreceptor similar to cryptochrome DASH|DNA photolyase%2C FAD-binding/Cryptochrome
1454398	-2.73139	5.93929e-13	product_name=hypothetical protein
1503601	-2.73138	7.6544e-64	product_name=hypothetical protein
1477825	-2.73063	4.88344e-19	product_name=Translation Initiation factor eIF- 4e-like domain-containing protein
1505838	-2.72953	1.59154e-27	product_name=hypothetical protein
1587470	-2.72736	7.90514e-45	product_name=serine hydroxymethyltransferase-domain-containing protein
1456274	-2.72613	7.54983e-105	product_name=alkaline-phosphatase-like protein
1588502	-2.72533	1.98269e-32	product_name=Endonuclease/exonuclease/phosphatase
1115782	-2.72515	0.0501328	product_name=glycoside hydrolase family 3 protein
1472235	-2.72352	1.3083e-137	product_name=glycosyltransferase family 77 protein
1534224	-2.7212	5.31513e-51	product_name=HIT-like domain-containing protein
1489693	-2.72103	1.59931e-189	product_name=3-oxo-5-alpha-steroid 4-dehydrogenase-domain containing protein
1527407	-2.72056	7.83327e-51	product_name=Sas10 C-terminal domain-containing protein
1490939	-2.71711	0	product_name=rab GTPase activator
1540464	-2.71593	8.76051e-112	product_name=phosphatidylserine decarboxylase-domain-containing protein
1479948	-2.71129	0.0033524	product_name=hypothetical protein
1495176	-2.70942	6.81135e-65	product_name=uracil-DNA glycosylase-like protein
1486541	-2.70495	1.39463e-45	product_name=Thioredoxin-like fold
1454607	-2.7033	2.94644e-48	product_name=Ribokinase-like protein
1144010	-2.70175	3.24364e-68	product_name=Domain of unknown function (DUF2828)-domain containing protein
1511614	-2.70112	7.25446e-99	product_name=Anp1-domain containing protein
1537602	-2.69821	2.25377e-289	product_name=chitin synthase
1457077	-2.69319	7.69398e-08	product_name=hypothetical protein
1497643	-2.69253	1.96976e-22	product_name=expressed protein
1547697	-2.69054	3.11349e-72	product_name=Protein of unknown function (DUF1681)-domain containing protein
1549499	-2.68729	8.15527e-153	product_name=hypothetical protein
1592288	-2.68717	5.40967e-06	product_name=Glycoside hydrolase superfamily
1347865	-2.68667	1.69751e-24	product_name=hypothetical protein
1565158	-2.68614	6.37943e-32	product_name=CDC50/LEM3 family
1372558	-2.68206	7.62866e-07	product_name=C2H2-type zinc finger transcription factor
1377346	-2.68196	5.86985e-57	product_name=hypothetical protein
1489610	-2.67876	4.62096e-17	product_name=hypothetical protein
1548828	-2.67846	3.74804e-85	product_name=Pmk1 MAPK|Protein kinase-like domain-containing protein
1504426	-2.67833	1.34128e-30	product_name=hypothetical protein
1511540	-2.67475	5.79222e-22	product_name=acyltransferase-domain-containing protein
1535096	-2.67269	3.3963e-179	product_name=fibrillarin
1383596	-2.6719	0.055803	product_name=hypothetical protein
1438866	-2.67168	0.0134209	product_name=carbohydrate esterase family 4 protein
1477828	-2.67116	3.00742e-43	product_name=Prefoldin subunit 6
1468096	-2.66703	1.61855e-266	product_name=putative vacuolar transporter chaperone
1596547	-2.6669	1.04985e-72	product_name=rRNA processing protein nop9
1394253	-2.66599	6.96906e-48	product_name=glycoside hydrolase
1472920	-2.66502	1.03859e-38	product_name=Tim10/DDP family zinc finger-domain containing protein
1394291	-2.66407	2.98107e-19	product_name=hypothetical protein
1488672	-2.66405	2.30175e-78	product_name=hypothetical protein
1515552	-2.66399	1.24994e-25	product_name=hypothetical protein
1538711	-2.66267	7.83955e-24	product_name=Putative RNA methylase family UPF0020-domain containing protein
1502576	-2.65291	1.382e-06	product_name=hypothetical protein
1448092	-2.65235	6.65418e-18	product_name=Helix-loop-helix DNA-binding domain-containing transcription factor|helix-loop-helix DNA-binding domain-containing transcription factor OAD08107.1 helix-loop-helix DNA-binding domain-containing transcription factor
1500312	-2.65182	1.42841e-56	product_name=DNA-directed RNA polymerase I
1518536	-2.65057	4.30906e-184	product_name=hypothetical protein
1549423	-2.64609	8.62035e-18	product_name=hypothetical protein
1524249	-2.64574	0.0133464	product_name=hypothetical protein
1536150	-2.64445	9.1144e-66	product_name=WD40-repeat-containing domain protein
1486451	-2.644	1.66164e-27	product_name=Haemolysin-III related-domain containing protein
1481243	-2.64182	1.33163e-43	product_name=PGAP1-like protein-domain-containing protein
1464660	-2.6412	2.11341e-17	product_name=hypothetical protein
1461755	-2.6403	5.4335e-257	product_name=Glutamate/Leucine/Phenylalanine/Valine dehydrogenase-domain containing protein
1372168	-2.64019	2.01062e-30	product_name=ATP10 protein-domain-containing protein
1437973	-2.63992	9.37127e-78	product_name=hypothetical protein
1390225	-2.63457	0.0151518	product_name=hypothetical protein
1521867	-2.63389	0.0148577	product_name=hypothetical protein
1453576	-2.63088	8.09386e-26	product_name=hypothetical protein
1554857	-2.62732	7.38886e-07	product_name=hypothetical protein
1371978	-2.62388	6.54183e-13	product_name=Rof/RNase P-like protein
1535783	-2.62169	2.45343e-40	product_name=hypothetical protein
1458113	-2.62104	1.25914e-08	product_name=RlpA-like double-psi beta-barrel-protein domain-containing protein-containing protein
1506137	-2.61877	0.0155999	product_name=OPT family small oligopeptide transporter
1586212	-2.61775	4.25387e-143	product_name=hypothetical protein
1462426	-2.61644	2.09906e-86	product_name=NAD-dependent glycerol-3-phosphate dehydrogenase C-terminus-domain containing protein
1364222	-2.61194	0.000799088	product_name=hypothetical protein
1369584	-2.61028	2.16101e-85	product_name=hypothetical protein
1348301	-2.60541	1.17254e-66	product_name=hypothetical protein
1550499	-2.60469	8.92116e-89	product_name=Chloroperoxidase
1506452	-2.60466	5.06996e-115	product_name=acyltransferase ChoActase/COT/CPT
1529156	-2.60458	8.66386e-11	product_name=hypothetical protein
1482782	-2.60414	3.11224e-27	product_name=P-loop containing nucleoside triphosphate hydrolase protein
1461193	-2.60321	5.62481e-17	product_name=Rho GTPase activation protein
1515977	-2.60106	4.34728e-05	product_name=Rgp1-domain-containing protein
1470048	-2.59891	2.06423e-88	product_name=MCM2/3/5 family-domain containing protein
1530803	-2.59777	2.54986e-62	product_name=hypothetical protein
1390373	-2.5974	1.30343e-05	product_name=Mitochondrial carrier domain-containing protein
1495263	-2.59737	2.17901e-76	product_name=hypothetical protein
1542139	-2.59648	1.39668e-20	product_name=Ras guanine nucleotide exchange factor domain-containing protein
1374421	-2.59547	5.64515e-46	product_name=IQ domain-containing protein
1172053	-2.59357	1.24359e-24	product_name=FtsJ-like methyltransferase-domain containing protein
1594000	-2.59214	1.25836e-06	product_name=hypothetical protein
1598512	-2.59057	3.64158e-20	product_name=hypothetical protein
1455582	-2.58981	9.8319e-57	product_name=sec7 domain-containing protein
1515854	-2.58935	8.50275e-23	product_name=hypothetical protein
1497352	-2.58766	5.58604e-169	product_name=HOOK protein-domain containing protein
1467506	-2.58668	2.02169e-53	product_name=hypothetical protein
1473228	-2.58587	1.54417e-81	product_name=hypothetical protein
1489540	-2.58354	0.0428624	product_name=RTA1 like protein-domain containing protein
1525472	-2.58327	0	product_name=Thiamin diphosphate-binding fold
1472727	-2.5824	9.10639e-214	product_name=Dynamin central region-domain containing protein
1490318	-2.58178	0.000139237	product_name=hypothetical protein
1548709	-2.58136	1.36027e-86	product_name=eukaryotic integral membrane protein-domain-containing protein
1557673	-2.58104	3.12392e-42	product_name=P-loop containing nucleoside triphosphate hydrolase protein
1454892	-2.57873	0.00043288	product_name=nucleotide-diphospho-sugar transferase
1451329	-2.57787	1.58959e-12	product_name=hypothetical protein
1499551	-2.57565	6.14038e-77	product_name=hypothetical protein
1452939	-2.57453	2.08668e-205	product_name=tRNA synthetases class I%2C catalytic domain-containing protein
1593638	-2.5744	1.08551e-06	product_name=hypothetical protein
1480110	-2.57438	1.54346e-12	product_name=RlpA-like double-psi beta-barrel-protein domain-containing protein-containing protein
1471086	-2.57418	0.000149498	product_name=hypothetical protein
1176600	-2.57397	6.64451e-87	product_name=hypothetical protein
1540333	-2.57201	2.46937e-111	product_name=TRAPP II complex
1519912	-2.56918	2.87228e-58	product_name=hypothetical protein
1520087	-2.56357	0	product_name=Cobalamin-independent synthase%2C Catalytic domain-domain containing protein
1538756	-2.56231	6.51227e-10	product_name=Protein-tyrosine phosphatase-like protein
1507941	-2.5618	1.06077e-12	product_name=expressed protein
1452985	-2.55851	6.19655e-143	product_name=hypothetical protein
1473258	-2.5578	0	product_name=cytochrome P450 CYP51
1374450	-2.55748	2.8596e-23	product_name=hypothetical protein
1503858	-2.55464	3.36748e-40	product_name=Acyl-CoA N-acyltransferase
1527589	-2.55262	3.16344e-29	product_name=ER-to-golgi vesicle protein transport Sft2
1508562	-2.55185	2.00488e-105	product_name=DNA polymerase phi-domain-containing protein
1591401	-2.55137	5.61484e-47	product_name=G protein beta subunit|G protein beta subunit OAD06917.1 G protein beta subunit
1372410	-2.54884	1.37751e-144	product_name=Manganese/iron superoxide dismutase
1431310	-2.54286	2.94998e-21	product_name=hypothetical protein
1566005	-2.54168	1.96467e-09	product_name=hypothetical protein
1347700	-2.53989	1.89851e-22	product_name=hypothetical protein
1507113	-2.53941	1.37134e-143	product_name=CRAL-TRIO domain-containing protein
1465504	-2.53825	8.18728e-65	product_name=camp-dependent protein kinase
1557448	-2.53636	2.20177e-95	product_name=MCM2/3/5 family-domain containing protein
1515846	-2.53621	2.77667e-15	product_name=hypothetical protein
1511339	-2.53559	2.75355e-129	product_name=Serine/Threonine kinase|Serine/Threonine kinase CK1
1494808	-2.53517	2.38009e-76	product_name=methylcrotonoyl-CoA carboxylase beta chain
1448129	-2.53436	4.67012e-149	product_name=hypothetical protein
1482333	-2.53322	9.70819e-307	product_name=hypothetical protein
1536138	-2.53029	1.53509e-252	product_name=hypothetical protein
1473027	-2.52907	8.72967e-23	product_name=Uncharacterised ACR%2C YagE family COG1723-domain containing protein
1355922	-2.52638	2.29635e-152	product_name=CDP-alcohol phosphatidyltransferase-domain containing protein
1453569	-2.52636	6.32254e-30	product_name=Zn(2)-C6 fungal-specific transcription factor|Zn(2)-C6 fungal-specific transcription factor OAD01721.1 Zn(2)-C6 fungal-specific transcription factor
1485927	-2.52521	1.49564e-29	product_name=Anticodon-binding protein
1546179	-2.52507	4.08739e-10	product_name=expressed protein
1546527	-2.52423	0.0502928	product_name=hypothetical protein
1483235	-2.52126	2.35753e-24	product_name=P-loop containing nucleoside triphosphate hydrolase protein
1515851	-2.51966	8.78738e-23	product_name=UAA transporter
1601518	-2.519	6.69054e-13	product_name=DIL domain-containing protein
1373133	-2.51894	0.001268	product_name=hypothetical protein
1469302	-2.51775	5.82854e-08	product_name=Zn(2)-C6 fungal-specific transcription factor
1140241	-2.51747	2.88863e-18	product_name=C2H2-type zinc finger transcription factor
1529695	-2.5157	0	product_name=Helix-loop-helix DNA-binding domain-containing transcription factor|helix-loop-helix DNA-binding domain-containing transcription factor OAD00329.1 helix-loop-helix DNA-binding domain-containing transcription factor
1481165	-2.51481	1.16854e-17	product_name=YbaK/aminoacyl-tRNA synthetase-associated domain-containing protein
1492355	-2.5133	7.08903e-10	product_name=hypothetical protein
1350069	-2.51327	1.60807e-10	product_name=hypothetical protein
1479794	-2.513	7.03231e-22	product_name=leucine rich repeat protein
1446232	-2.51251	7.28646e-25	product_name=Alpha/beta knot methyltransferase
1463177	-2.50903	1.66921e-05	product_name=YhhN-like protein
1479208	-2.50787	2.01356e-22	product_name=hypothetical protein
1470386	-2.50655	1.6276e-238	product_name=hypothetical protein
1396018	-2.50625	2.23717e-11	product_name=Mss4-like protein
1473161	-2.50591	4.64656e-30	product_name=Zn(2)-C6 fungal-specific transcription factor
1391973	-2.50578	3.14096e-06	product_name=hypothetical protein
1557440	-2.50402	0.000107967	product_name=hypothetical protein
1394066	-2.50338	0.00459161	product_name=hypothetical protein
1595812	-2.50217	2.04372e-07	product_name=hypothetical protein
1378177	-2.5007	3.77209e-21	product_name=WD40-repeat-containing domain protein
1513734	-2.4996	3.73983e-105	product_name=Protein of unknown function (DUF3808)-domain containing protein
1464393	-2.49929	1.65705e-26	product_name=Major facilitator superfamily domain-containing protein
1488753	-2.49912	6.4834e-35	product_name=Urb2/Npa2 family-domain containing protein
1476501	-2.49759	2.57111e-148	product_name=hypothetical protein
1457561	-2.49647	1.66829e-15	product_name=Pyridoxal phosphate-dependent transferase
1535789	-2.49524	9.69627e-34	product_name=hypothetical protein
1379184	-2.4931	8.65176e-257	product_name=hypothetical protein
1468199	-2.48879	0	product_name=Carbohydrate-Binding Module Family 13 protein|carbohydrate-binding module family 13 protein OAD01005.1 carbohydrate-binding module family 13 protein
1444183	-2.48786	8.7718e-55	product_name=U3 small nucleolar ribonucleo protein complex%2C subunit Mpp10
1526742	-2.48675	4.89812e-30	product_name=Oxoglutarate and iron-dependent oxygenase degradation C-term-domain containing protein
1354593	-2.48651	1.28491e-287	product_name=fatty acid synthase
1464670	-2.48619	1.95599e-151	product_name=hypothetical protein
1474498	-2.48365	9.58221e-66	product_name=NADH dehydrogenase 1 alpha/beta subcomplex 1 KAF1801851.1 acyl carrier protein-like protein
1528451	-2.48232	3.31661e-16	product_name=DHHC palmitoyltransferase-domain containing protein
1504596	-2.48197	2.61532e-54	product_name=phosphatidate cytidylyltransferase
1479258	-2.48193	3.59497e-45	product_name=C2H2-type zinc finger transcription factor
1495103	-2.4781	4.66288e-47	product_name=protein-tyrosine phosphatase-like protein
1500586	-2.47544	1.31983e-32	product_name=U3 small nucleolar RNA-associated protein 6-domain-containing protein
1375680	-2.47017	1.74164e-16	product_name=epressed protein
1557085	-2.46992	1.35775e-42	product_name=Ras guanine nucleotide exchange factor domain-containing protein
1475866	-2.46889	1.7792e-96	product_name=Alpha/Beta hydrolase fold
1544080	-2.4673	3.05604e-49	product_name=acyl-coenzyme A binding domain containing
1492984	-2.46466	1.0147e-05	product_name=hypothetical protein
1506142	-2.46416	9.97912e-23	product_name=Ribonuclease H2%2C subunit B
1532543	-2.46346	1.69639e-36	product_name=Ribosome biogenesis protein Nop53/GLTSCR2
1388116	-2.46264	0	product_name=aminopeptidase
1136709	-2.46235	0.057966	product_name=hypothetical protein
1466266	-2.46039	1.69779e-29	product_name=hypothetical protein
1597263	-2.45998	7.10187e-89	product_name=hypothetical protein
1552372	-2.4564	8.96833e-115	product_name=Armadillo-type fold
1319340	-2.45576	1.88257e-56	product_name=hypothetical protein
1477151	-2.45465	0	product_name=Histone-fold-containing protein
1506460	-2.4531	1.61451e-50	product_name=Mitochondrial carrier domain-containing protein
1473442	-2.45229	1.8144e-243	product_name=hypothetical protein
1484154	-2.44818	7.27757e-25	product_name=Ferroporti-1
1477364	-2.44748	6.67725e-157	product_name=CobW/HypB/UreG%2C nucleotide-binding domain-domain containing protein
1588470	-2.43995	4.79227e-122	product_name=hypothetical protein
1479222	-2.4378	2.02592e-15	product_name=Bicoid-interacting protein 3 (Bin3)-domain containing protein
1484838	-2.43702	3.06537e-07	product_name=Dolichyl-phosphate-mannose-protein mannosyltransferase-domain-containing protein
1464935	-2.43533	1.40185e-301	product_name=P-loop containing nucleoside triphosphate hydrolase protein
1165324	-2.43394	1.40662e-104	product_name=hypothetical protein
1494637	-2.43315	4.00334e-299	product_name=P-loop containing nucleoside triphosphate hydrolase protein
1543283	-2.42955	4.51872e-08	product_name=Methyltransferase domain-domain containing protein
1393736	-2.42741	2.89907e-21	product_name=bacterial low temperature requirement A protein-domain-containing protein
1374885	-2.42561	3.17152e-27	product_name=RNA 3'-terminal phosphate cyclase domain-containing protein
1518454	-2.42235	4.63454e-73	product_name=Triose-phosphate Transporter family-domain containing protein
1387328	-2.42128	3.21876e-16	product_name=aldehyde dehydrogenase domain-containing protein
1517800	-2.41881	0.0153151	product_name=hypothetical protein
1511207	-2.41817	0	product_name=Adenylosuccinate synthetase
1502740	-2.41292	3.24807e-33	product_name=Protein of unknown function (DUF2009)-domain containing protein
1377456	-2.41224	1.79083e-07	product_name=Domain of unknown function (DUF4203)-domain containing protein
1538719	-2.41138	1.2574e-10	product_name=putative PEP8-vacuolar protein sorting/targeting protein
1505826	-2.41109	0	product_name=Eukaryotic porin/Tom40
1377103	-2.41035	4.25808e-09	product_name=Regulator of development and secondary metabolism of the velvet family. Similar to VelB/VelC|Velvet factor-domain containing protein
1601029	-2.40736	6.65695e-33	product_name=hypothetical protein
1507873	-2.40688	0	product_name=Cytochrome c CYTC|cytochrome c OAD08454.1 cytochrome c GAN10317.1 cytochrome c
1438176	-2.40647	0.0285758	product_name=expressed protein
1494209	-2.4059	2.18079e-07	product_name=Cytidine deaminase-like protein
1518697	-2.40329	0	product_name=hypothetical protein
1457102	-2.40244	2.29805e-14	product_name=hypothetical protein
1448073	-2.40083	7.98e-28	product_name=expressed protein|NADH-ubiquinone oxidoreductase subunit NI9M
1334600	-2.40066	5.57303e-187	product_name=Septin-domain containing protein
1550427	-2.40013	0	product_name=hypothetical protein
1377588	-2.39955	1.94885e-09	product_name=Acyl-CoA N-acyltransferase
1485215	-2.39931	0	product_name=Aspartic peptidase domain-containing protein
1386412	-2.39917	4.63449e-30	product_name=Elongator complex protein 5
1353499	-2.39871	3.71272e-48	product_name=PPP4R2-domain containing protein
1478111	-2.39807	1.38226e-43	product_name=hypothetical protein
1504306	-2.39765	2.11978e-73	product_name=hypothetical protein
1528165	-2.3973	8.63312e-43	product_name=hypothetical protein
1545208	-2.39702	3.37632e-23	product_name=Velvet factor-domain containing protein
1504151	-2.39624	3.36204e-24	product_name=Pyridoxal phosphate-dependent transferase
1468873	-2.39565	7.9153e-104	product_name=mitochondrial inner membrane protein-domain-containing protein
1463493	-2.39528	1.86539e-126	product_name=fibronectin-binding protein A N-terminus-domain-containing protein
1482125	-2.3952	1.12378e-123	product_name=hypothetical protein
1451753	-2.39515	0.000285631	product_name=Homeodomain-like DNA binding domain-containing transcription factor
1473157	-2.39491	1.65881e-72	product_name=Atypical/PI4K protein kinase
1530345	-2.39423	9.47461e-53	product_name=hypothetical protein
1525758	-2.39376	1.04495e-130	product_name=lactoylglutathione lyase
1000305	-2.39334	5.23235e-32	product_name=ras-like protein 3
1353562	-2.39309	1.86041e-101	product_name=succinate dehydrogenase|Succinate dehydrogenase (ubiquinone) flavoprotein subunit 2 SDH2
1547878	-2.39227	3.29112e-90	product_name=protein kinase|Protein Kinase A regulatory subunit
1597699	-2.39225	1.80693e-78	product_name=transcription factor CBF
1484230	-2.39011	6.38058e-168	product_name=ATP synthase|ATP synthase subunit K ATP19
1396173	-2.3898	0.013081	product_name=Thaumatin
1557504	-2.38851	1.57001e-28	product_name=quinon protein alcohol dehydrogenase-like superfamily
1461833	-2.38456	2.12559e-31	product_name=hypothetical protein
1361034	-2.38273	2.18128e-128	product_name=ATP synthase|ATP synthase F1 subcomplex delta subunit ATP16
1524471	-2.38235	7.71347e-10	product_name=Adenosine deaminase/editase|Regulator of development and secondary metabolism of the velvet family. Similar to VosA
1596305	-2.38195	6.06884e-160	product_name=hypothetical protein
1534907	-2.38069	8.21698e-26	product_name=hypothetical protein
1564487	-2.38063	0.0326882	product_name=hypothetical protein
1548672	-2.3785	2.49096e-95	product_name=Mitochondrial carrier domain-containing protein
1515134	-2.3778	0	product_name=RlpA-like double-psi beta-barrel-protein domain-containing protein-containing protein
1598298	-2.37205	1.81682e-17	product_name=hypothetical protein
1386661	-2.36969	0.00758263	product_name=hypothetical protein
1493974	-2.36965	2.53218e-65	product_name=hypothetical protein
1366133	-2.36939	1.13711e-62	product_name=Ubiquitin-conjugating enzyme/RWD-like protein
1480695	-2.36913	1.21709e-40	product_name=hypothetical protein
1384248	-2.36827	2.30142e-60	product_name=Protein of unknown function (DUF663)-domain containing protein
1476748	-2.3664	1.64979e-05	product_name=Pseudouridine synthase
1522251	-2.36551	6.79967e-56	product_name=GPI transamidase|GPI transamidase GPI16
1441627	-2.36447	0.000832812	product_name=hypothetical protein
1546050	-2.36402	3.11142e-116	product_name=Protein of unknown function (DUF2433)-domain containing protein
1492285	-2.3634	1.2735e-25	product_name=Ribose 5-phosphate isomerase A (phosphoriboisomerase A)-domain containing protein
1512391	-2.36212	2.16714e-16	product_name=Rho GTPase activation protein
1355789	-2.36122	7.96661e-57	product_name=chitin deacetylase
1370951	-2.36005	1.13545e-38	product_name=hypothetical protein
1542151	-2.35998	1.86968e-72	product_name=Armadillo-type fold
1459002	-2.35927	2.34764e-80	product_name=hypothetical protein
1511848	-2.35716	2.07417e-36	product_name=hypothetical protein
1518839	-2.35637	2.31869e-05	product_name=hypothetical protein
1511905	-2.35358	3.43992e-138	product_name=hypothetical protein
1478508	-2.35191	1.54119e-13	product_name=P-loop containing nucleoside triphosphate hydrolase protein
1495435	-2.35178	3.22153e-47	product_name=Integral membrane protein DUF92-domain containing protein
1510371	-2.34787	3.61535e-249	product_name=P-loop containing nucleoside triphosphate hydrolase protein
1477376	-2.3469	1.65191e-08	product_name=hypothetical protein
1523296	-2.34328	4.82626e-05	product_name=hypothetical protein
1459039	-2.34276	2.72558e-11	product_name=hypothetical protein
1547830	-2.34246	7.00823e-25	product_name=Like-Sm (LSM) domain-containing protein
1496522	-2.34232	2.01382e-07	product_name=hypothetical protein
1544162	-2.34196	3.42189e-39	product_name=Zinc/iron permease
1459184	-2.34149	2.28319e-225	product_name=Glycolipid transfer protein domain-containing protein
1530921	-2.33996	0.000268854	product_name=thioredoxin-like protein
1511240	-2.33977	2.25806e-05	product_name=hypothetical protein
1520282	-2.33947	2.6996e-58	product_name=DNA-directed RNA polymerase%2C insert domain-containing protein
1513440	-2.33931	4.97324e-75	product_name=S-adenosyl-L-methionine-dependent methyltransferase
1379918	-2.33804	3.01606e-45	product_name=TH1 protein
1547023	-2.33758	7.78947e-25	product_name=hypothetical protein
1541435	-2.33639	1.39294e-70	product_name=hypothetical protein
1414357	-2.33577	3.03267e-06	product_name=hypothetical protein
1497290	-2.33527	1.70237e-32	product_name=hypothetical protein
1494321	-2.33524	1.84787e-42	product_name=hypothetical protein
1357504	-2.33431	6.50526e-36	product_name=cyclin-domain-containing protein
1543456	-2.33343	1.13883e-06	product_name=hypothetical protein
1391276	-2.33271	1.08039e-72	product_name=ETC complex I subunit conserved region-domain-containing protein
1457599	-2.32942	1.29301e-94	product_name=developmentally-regulated GTP-binding protein 1
1509213	-2.32724	9.32059e-14	product_name=hypothetical protein
1381561	-2.32696	1.32444e-25	product_name=hypothetical protein
1482455	-2.3251	3.76054e-140	product_name=ClpP/crotonase-like domain-containing protein
1529446	-2.32451	6.31264e-124	product_name=hypothetical protein
1442967	-2.32256	5.80662e-40	product_name=hypothetical protein
1458618	-2.32225	2.27665e-07	product_name=Phosphatidylinositol N-acetylglucosaminyltransferase subunit Y-domain containing protein
1595586	-2.32214	7.7934e-05	product_name=kinase-like domain-containing protein
1359316	-2.3202	1.49141e-06	product_name=hypothetical protein
1596865	-2.31998	1.45885e-28	product_name=hypothetical protein
1588146	-2.31906	0.00119458	product_name=hypothetical protein
1509284	-2.31801	6.32647e-08	product_name=Domain of unknown function (DUF4477)-domain containing protein
1520688	-2.31733	9.74337e-70	product_name=Dihydropteroate synthase-like protein
1465208	-2.31527	2.00729e-249	product_name=ATP synthase|ATP synthase F0 subcomplex subunit OSCP (oligomycin sensitivity conferral protein) ATP5
1528592	-2.31386	0	product_name=expansin-YoaJ
1503150	-2.31123	1.82778e-23	product_name=Uncharacterised protein family UPF0172
1542121	-2.3092	1.44472e-86	product_name=hypothetical protein
1382080	-2.30814	1.17876e-64	product_name=class II peroxidase
1549709	-2.30765	3.09265e-13	product_name=hypothetical protein
1350552	-2.3061	2.04306e-54	product_name=Noc2p family-domain-containing protein
1381759	-2.30606	1.92121e-91	product_name=Mitochondrial carrier domain-containing protein
1516366	-2.30411	0.00439305	product_name=transmembrane amino acid transporter protein-domain-containing protein
1546843	-2.30226	7.43721e-05	product_name=cytochrome P450
1490728	-2.3011	7.45417e-09	product_name=expressed protein
1328137	-2.30091	4.38337e-27	product_name=hypothetical protein
1493003	-2.29926	1.16655e-56	product_name=CDP-alcohol phosphatidyltransferase
1586658	-2.29704	3.15657e-16	product_name=Pex2 / Pex12 amino terminal region-domain containing protein
1492570	-2.29422	6.91927e-60	product_name=RNA polymerase I associated factor%2C A49-like protein
1457700	-2.29088	2.81162e-14	product_name=Protein kinase-like domain-containing protein
1553228	-2.28888	1.64417e-18	product_name=hypothetical protein
1379739	-2.28807	2.34462e-18	product_name=hypothetical protein
1484045	-2.28674	1.87147e-284	product_name=ATP synthase F0 subcomplex subunit F ATP17|Mitochondrial F1-F0 ATP synthase subunit F of fungi-domain containing protein
1521237	-2.28431	5.14943e-59	product_name=hypothetical protein
1546512	-2.28413	1.71449e-40	product_name=defective in Cullin neddylation protein 1
1450694	-2.28232	3.14462e-129	product_name=hypothetical protein
1593246	-2.28136	0.00983362	product_name=Catalytic component of the RISC complex similar to Argonaute|Piwi domain-domain containing protein
1590398	-2.27741	1.77917e-23	product_name=organic solute transporter Ostalpha-domain-containing protein
1524223	-2.27634	1.54754e-10	product_name=expressed protein
1533294	-2.27532	5.6931e-106	product_name=hypothetical protein
1530819	-2.27482	7.78385e-43	product_name=kinase-like protein
1456642	-2.27444	7.25928e-21	product_name=hypothetical protein
1116047	-2.27403	0	product_name=hypothetical protein
1376132	-2.27242	4.2233e-17	product_name=ABC-2 type transporter-domain-containing protein
1460454	-2.2714	9.01237e-47	product_name=Domain of unknown function (DUF543)-domain containing protein
1459009	-2.26833	8.12774e-67	product_name=prefoldin%2C alpha subunit
1493578	-2.26651	7.54786e-186	product_name=ATP synthase|ATP synthase F0 subcomplex subunit H ATP14
1521215	-2.26421	0	product_name=glycoside hydrolase family 9 protein
1471082	-2.26409	3.91566e-29	product_name=Acyl-CoA N-acyltransferase
1156345	-2.26273	6.77801e-128	product_name=hypothetical protein
1460128	-2.25947	1.66658e-10	product_name=hypothetical protein
1530244	-2.25936	3.96119e-28	product_name=hypothetical protein
1534741	-2.25803	0	product_name=hypothetical protein
1364399	-2.258	0.0118079	product_name=hypothetical protein
1476967	-2.25723	1.21145e-103	product_name=Cytokine-induced anti-apoptosis inhibitor 1%2C Fe-S biogenesis-domain containing protein
1455994	-2.25385	1.76756e-167	product_name=malate dehydrogenase
1394117	-2.24946	2.67485e-55	product_name=hypothetical protein
1541014	-2.24806	1.49559e-14	product_name=chaperonin 10-like protein
1499448	-2.24799	3.68537e-15	product_name=cytidine deaminase-like protein
1439461	-2.24622	1.39519e-16	product_name=hypothetical protein
1365262	-2.24505	8.40347e-32	product_name=Elongation factor TS-domain containing protein
1518816	-2.24424	2.08065e-221	product_name=Reticulon-domain containing protein
1346716	-2.24255	1.77863e-20	product_name=hypothetical protein
1458211	-2.24065	2.99656e-56	product_name=hypothetical protein
1537005	-2.24039	7.15522e-134	product_name=SacI homology domain-domain containing protein
1476430	-2.23926	9.1404e-07	product_name=hypothetical protein
1522728	-2.23622	1.66704e-29	product_name=nucleotide/sugar transporter family protein
1348925	-2.23526	2.76495e-26	product_name=Protein of unknown function (DUF1640)-domain containing protein
1528113	-2.23489	1.47934e-46	product_name=WD40-repeat-containing domain protein
1525042	-2.23217	7.4316e-112	product_name=P-loop containing nucleoside triphosphate hydrolase protein
1498571	-2.23124	0	product_name=hypothetical protein
1515241	-2.23077	5.72718e-30	product_name=interferon-inducible GTPase-domain-containing protein
1297275	-2.22866	7.06496e-52	product_name=hypothetical protein
1542350	-2.22741	6.44991e-62	product_name=TRAPP trafficking subunit Trs65-domain containing protein
1384994	-2.22683	5.77394e-33	product_name=hypothetical protein
1462870	-2.22496	4.74024e-67	product_name=Formate--tetrahydrofolate ligase-domain containing protein
1473004	-2.22445	0.00387159	product_name=hypothetical protein
1526739	-2.22301	7.15813e-05	product_name=hypothetical protein
1527200	-2.22104	1.95405e-27	product_name=Histone H3-K56 acetyltransferase
1528804	-2.22009	1.67048e-27	product_name=amino acid permease-domain-containing protein
1510554	-2.21995	6.82537e-244	product_name=GHMP kinase%2C C-terminal domain-containing protein
1555082	-2.21899	1.17516e-12	product_name=D-isomer specific 2-hydroxyacid dehydrogenase
1541708	-2.2171	2.75967e-263	product_name=Chaperonin Cpn60/TCP-1 family
1450682	-2.21598	1.63952e-71	product_name=trehalase-domain-containing protein
1535233	-2.21428	3.19033e-10	product_name=hypothetical protein
1497344	-2.21372	2.25741e-34	product_name=CNH-domain-containing protein
1321135	-2.21348	4.732e-108	product_name=ARM repeat-containing protein
1477123	-2.2133	1.21737e-178	product_name=rRNA 2'-O-methyltransferase fibrillarin
1518160	-2.21295	5.02707e-149	product_name=hypothetical protein
1471459	-2.21085	4.29288e-34	product_name=beta-lactamase superfamily domain-containing protein
1530196	-2.21079	5.8432e-34	product_name=glycosyltransferase family 2 protein
1460431	-2.21071	2.37111e-17	product_name=GNAT domain-containing protein
1585128	-2.21057	2.26636e-17	product_name=hypothetical protein
1586864	-2.20931	5.98787e-33	product_name=THUMP domain-containing protein 1
1472337	-2.2092	8.26439e-45	product_name=Aldehyde dehydrogenase domain-containing protein
1544678	-2.20913	1.19417e-60	product_name=hypothetical protein
1502616	-2.20823	1.8052e-36	product_name=hypothetical protein
1586462	-2.20748	0.0140503	product_name=Regulator of G protein signaling domain-domain containing protein
1464428	-2.20726	6.49741e-25	product_name=Domain of unknown function (DUF4203)-domain containing protein
1291525	-2.20664	5.99944e-06	product_name=hypothetical protein
1467345	-2.20536	1.98685e-82	product_name=hypothetical protein
1537705	-2.20423	4.76593e-55	product_name=hypothetical protein
1368110	-2.20341	7.36354e-60	product_name=hypothetical protein
1508859	-2.20332	5.62027e-127	product_name=Caleosin related protein-domain-containing protein
1554806	-2.20231	5.99274e-217	product_name=cytochrome c1%2C component of the mitochondrial respiratory chain
1395834	-2.20048	0.0147585	product_name=hypothetical protein
1478604	-2.20022	2.68761e-33	product_name=hypothetical protein
1522164	-2.19957	1.20298e-81	product_name=hypothetical protein
1473780	-2.19699	1.25774e-11	product_name=TLC domain-domain containing protein
1479178	-2.19691	2.31946e-62	product_name=mono-functional DNA-alkylating methyl methanesulfonate N-term-domain-containing protein
1500271	-2.19552	4.66278e-45	product_name=hypothetical protein
1470027	-2.19499	9.47929e-226	product_name=Eukaryotic translation initiation factor 3 subunit D
1065281	-2.19351	0.00123546	product_name=expressed protein
1471543	-2.18994	4.54278e-20	product_name=hypothetical protein
1558376	-2.18894	3.50456e-44	product_name=hypothetical protein
1546084	-2.18602	2.92097e-135	product_name=hypothetical protein
1370719	-2.18589	4.97367e-74	product_name=minichromosome maintenance protein 2
1526856	-2.18546	2.5765e-51	product_name=hypothetical protein
1496258	-2.18217	5.87358e-05	product_name=hypothetical protein
1384361	-2.18192	4.71701e-196	product_name=calcium/calmodulin-dependent protein kinase type I
1535407	-2.18167	1.97426e-45	product_name=hypothetical protein
1477423	-2.18122	7.06136e-11	product_name=expressed protein
1518332	-2.1787	3.42344e-59	product_name=succinate dehydrogenase|Succinate dehydrogenase (ubiquinone) flavoprotein subunit 4 SDH4
1385076	-2.17803	2.55217e-23	product_name=S-adenosyl-L-methionine-dependent methyltransferase
1453008	-2.17765	5.09808e-44	product_name=Phosphoribosyltransferase-like protein
1528612	-2.17731	2.47011e-151	product_name=Dbl homology domain-containing protein
1363237	-2.17729	1.79164e-48	product_name=hypothetical protein
1520695	-2.17689	1.64373e-31	product_name=hypothetical protein
1488743	-2.17626	4.7756e-38	product_name=phosphoribosylglycinamide formyltransferase
1395861	-2.17568	2.57092e-172	product_name=P-loop containing nucleoside triphosphate hydrolase protein
1535297	-2.17546	0.00804407	product_name=hypothetical protein
1572680	-2.17369	0.00283635	product_name=polysaccharide lyase|Polysaccharide Lyase Family 8 protein
1514209	-2.17304	2.06559e-37	product_name=hypothetical protein
1463924	-2.16882	0.000859374	product_name=hypothetical protein
1456909	-2.16801	4.91896e-261	product_name=isocitrate dehydrogenase NAD-dependent subunit 2
1497033	-2.16788	3.2805e-129	product_name=Histone-fold-containing protein
1550019	-2.16648	3.0486e-205	product_name=nucleoside phosphorylase domain-containing protein
1466162	-2.16434	1.89586e-07	product_name=hypothetical protein
1336444	-2.16203	4.1421e-131	product_name=hypothetical protein
1522411	-2.16188	2.88187e-23	product_name=hypothetical protein
1598922	-2.16134	1.91087e-17	product_name=hypothetical protein
1491717	-2.16073	4.18434e-10	product_name=helix-loop-helix DNA-binding domain-containing transcription factor
1531752	-2.16065	3.88858e-38	product_name=ATP synthase regulation protein NCA2-domain containing protein
1480451	-2.15929	4.2162e-57	product_name=Acireductone dioxygenase ARD family
1324013	-2.15611	0.00269486	product_name=hypothetical protein
1520228	-2.15607	7.42764e-32	product_name=hypothetical protein
1539671	-2.15561	0	product_name=Domain of unknown function (DUF1900)-domain containing protein
1545960	-2.15529	2.24141e-50	product_name=hypothetical protein
1553276	-2.15481	1.76509e-28	product_name=Phosphatidylinositol N-acetylglucosaminyltransferase subunit C
1461567	-2.15429	2.25442e-143	product_name=NADH dehydrogenase|NADH dehydrogenase (ubiquinone) 1 beta subcomplex subunit 8 NDUFB8
1395610	-2.15327	1.55665e-32	product_name=hypothetical protein
1454803	-2.15237	5.1471e-38	product_name=RNA-binding domain-containing protein
1522048	-2.15228	1.03542e-53	product_name=hypothetical protein
1453776	-2.15054	8.25575e-07	product_name=hypothetical protein
1494030	-2.1505	2.3109e-15	product_name=GATA-type Zinc finger transcription factor|GATA-type zinc finger transcription factor OAD04930.1 GATA-type zinc finger transcription factor
1588845	-2.15041	1.9348e-39	product_name=ribonuclease H-like domain-containing protein
1341725	-2.14969	1.5219e-15	product_name=SRP40%2C C-terminal domain-containing protein
1325533	-2.14962	2.13277e-201	product_name=permease family-domain-containing protein
1584923	-2.14785	1.39689e-19	product_name=hypothetical protein
1477449	-2.14629	8.20157e-177	product_name=hypothetical protein
1515079	-2.14617	9.02319e-10	product_name=COPI associated protein-domain containing protein
1390652	-2.14608	9.68143e-34	product_name=hypothetical protein
1525127	-2.14375	4.66473e-59	product_name=heme peroxidase
1551958	-2.14246	2.35774e-94	product_name=Eisosome component PIL1-domain containing protein
1520795	-2.14238	0	product_name=Histone-fold-containing protein
1367223	-2.14233	3.28882e-44	product_name=Rab-GTPase-TBC domain-domain containing protein
1511196	-2.14179	9.79569e-59	product_name=Protein of unknown function (DUF663)-domain containing protein
1551079	-2.1417	2.47314e-14	product_name=hypothetical protein
1374032	-2.13795	1.09396e-10	product_name=ubiquitin-conjugating enzyme E2 T
1533835	-2.13772	1.77152e-163	product_name=hypothetical protein
1492313	-2.1363	2.68503e-80	product_name=hypothetical protein
1497542	-2.13576	7.72975e-61	product_name=hypothetical protein
1586590	-2.13562	0	product_name=Aldehyde/histidinol dehydrogenase
1542937	-2.13529	5.16951e-56	product_name=Cys/Met metabolism PLP-dependent enzyme-domain containing protein
1442768	-2.13481	3.33905e-32	product_name=TPT-domain-containing protein
1517218	-2.13474	2.29973e-26	product_name=Nucleoporin Nup85-like protein
1373922	-2.13444	3.73676e-11	product_name=hypothetical protein
1512425	-2.13353	9.84335e-18	product_name=Ubiquitin-conjugating enzyme/RWD-like protein
1587665	-2.13341	6.77119e-09	product_name=Methylenetetrahydrofolate reductase-domain containing protein
1475228	-2.12835	6.32533e-57	product_name=hypothetical protein
1448143	-2.12656	3.3026e-60	product_name=t-SNARE
1349062	-2.12591	8.48427e-08	product_name=Putative methyltransferase (DUF3321)-domain containing protein
1537385	-2.12416	3.16407e-280	product_name=ubiquinol-cytochrome c reductase|Ubiquinol-cytochrome c reductase core subunit 1
1443812	-2.12193	2.02359e-27	product_name=kinesin family member C1
1453076	-2.12172	8.00685e-60	product_name=hypothetical protein
1456131	-2.12033	5.82854e-20	product_name=hypothetical protein
1541084	-2.11929	4.04011e-09	product_name=Major facilitator superfamily domain-containing protein
1591689	-2.11781	1.5295e-167	product_name=hypothetical protein
1359484	-2.1177	1.20205e-53	product_name=Actin family
1471988	-2.11723	3.62462e-90	product_name=hypothetical protein
1530213	-2.1168	7.24736e-25	product_name=hypothetical protein
1507861	-2.11539	2.80075e-106	product_name=hypothetical protein
1467539	-2.1139	2.08672e-10	product_name=ClpP/crotonase-like domain-containing protein
1588464	-2.11365	3.13172e-115	product_name=caspase domain-containing protein
1355237	-2.11338	3.18714e-24	product_name=hypothetical protein
1529337	-2.11331	9.96178e-05	product_name=hypothetical protein
1493298	-2.11265	8.63431e-27	product_name=kinase-like domain-containing protein
1469352	-2.11215	4.88728e-75	product_name=kinase-like domain-containing protein
1477598	-2.11159	0.00032786	product_name=hypothetical protein
1474418	-2.11088	2.11993e-123	product_name=NADP-dependent oxidoreductase domain-containing protein
1543707	-2.11053	1.19775e-84	product_name=phosphoribosylaminoimidazole carboxylase
1543378	-2.10844	5.18123e-14	product_name=Mitochondrial carrier domain-containing protein
1481704	-2.10834	2.37356e-14	product_name=hypothetical protein
1455852	-2.10758	1.07739e-65	product_name=Tim17/Tim22/Tim23/Pmp24 family-domain containing protein
1464797	-2.10481	2.40295e-100	product_name=p53-like transcription factor|p53-like transcription factor OAD01376.1 p53-like transcription factor
1470520	-2.10455	5.0315e-162	product_name=P-loop containing nucleoside triphosphate hydrolase protein
1488435	-2.10453	2.75758e-43	product_name=GWT1 involved in Inositol acylation|GWT1-domain containing protein
1492989	-2.10416	6.59251e-115	product_name=hypothetical protein
1483414	-2.10317	1.54067e-102	product_name=armadillo-type protein
1504032	-2.10272	3.06761e-149	product_name=cytochrome c oxidase|Cytochrome c oxidase subunit 6B COX6B
1528714	-2.10152	2.07945e-65	product_name=hypothetical protein
1547368	-2.1015	2.21842e-26	product_name=p53-like transcription factor|p53-like transcription factor OAC98843.1 p53-like transcription factor
1344598	-2.09923	5.26045e-56	product_name=Glutathione S-transferase%2C C-terminal-like protein
1466056	-2.09903	1.07054e-73	product_name=hypothetical protein
1392856	-2.0986	6.20061e-22	product_name=hypothetical protein
1548652	-2.09587	1.90247e-31	product_name=regulator of chromosome condensation 1/beta-lactamase-inhibitor protein II
1472422	-2.09299	4.16178e-26	product_name=Protein kinase-like domain-containing protein
1381769	-2.09271	1.65796e-05	product_name=Amino acid permease-domain containing protein
1473065	-2.09179	2.70205e-134	product_name=hypothetical protein
1517335	-2.09167	2.03544e-09	product_name=MIZ-type Zinc finger transcription factor|MIZ-type zinc finger transcription factor OAD03120.1 MIZ-type zinc finger transcription factor
1550913	-2.08967	1.12071e-58	product_name=Homeodomain-like DNA binding domain-containing transcription factor
1485863	-2.08799	9.27103e-16	product_name=expressed protein
1361187	-2.0866	0.0299104	product_name=hypothetical protein
1529177	-2.08635	2.416e-70	product_name=hypothetical protein
1496926	-2.08629	6.78503e-22	product_name=hypothetical protein
1350746	-2.0854	1.60194e-10	product_name=RmlC-like cupin domain-containing protein
1471012	-2.08532	1.33441e-32	product_name=Prefoldin beta-like protein
1510003	-2.08459	1.05831e-55	product_name=WD40-repeat-containing domain protein
1365111	-2.08418	1.88946e-10	product_name=triacylglycerol lipase
1473244	-2.08351	7.76758e-08	product_name=hypothetical protein
1385014	-2.08103	1.1048e-79	product_name=P-loop containing nucleoside triphosphate hydrolase protein
1457179	-2.07797	2.50631e-53	product_name=P-loop containing nucleoside triphosphate hydrolase protein
1594858	-2.07792	2.15821e-28	product_name=Beta-lactamase-like protein
1373830	-2.07756	0.00763315	product_name=hypothetical protein
1523144	-2.07676	4.7085e-54	product_name=hypothetical protein
1564058	-2.07449	9.62382e-15	product_name=FAD-linked oxidoreductase-like protein
1544084	-2.07437	5.35756e-09	product_name=hypothetical protein
1453515	-2.07402	1.29191e-19	product_name=Glycoside Hydrolase Family 5 protein|glycoside hydrolase superfamily
1501734	-2.07341	3.09211e-26	product_name=hypothetical protein
1477596	-2.07323	2.1038e-11	product_name=P-loop containing nucleoside triphosphate hydrolase protein
1565943	-2.07272	0.000150414	product_name=hypothetical protein
1552035	-2.07235	2.97196e-08	product_name=Alpha/Beta hydrolase fold
1464509	-2.07121	3.39162e-94	product_name=hypothetical protein
1516482	-2.07112	2.64091e-20	product_name=hypothetical protein
1496199	-2.06908	9.85412e-64	product_name=hypothetical protein
[truncated: 4,392 more rows]
