# Supplementary material for: Coordinated Gene Family Evolution Shapes the Genome of Dimorphic Organisms
Source: Research Square preprint supplement (doi:10.21203/rs.3.rs-6393820/v1), 2025-04-08
Supplement: Supplementary file 3 [file 659d34468c9858ee2b3908a5.pdf]

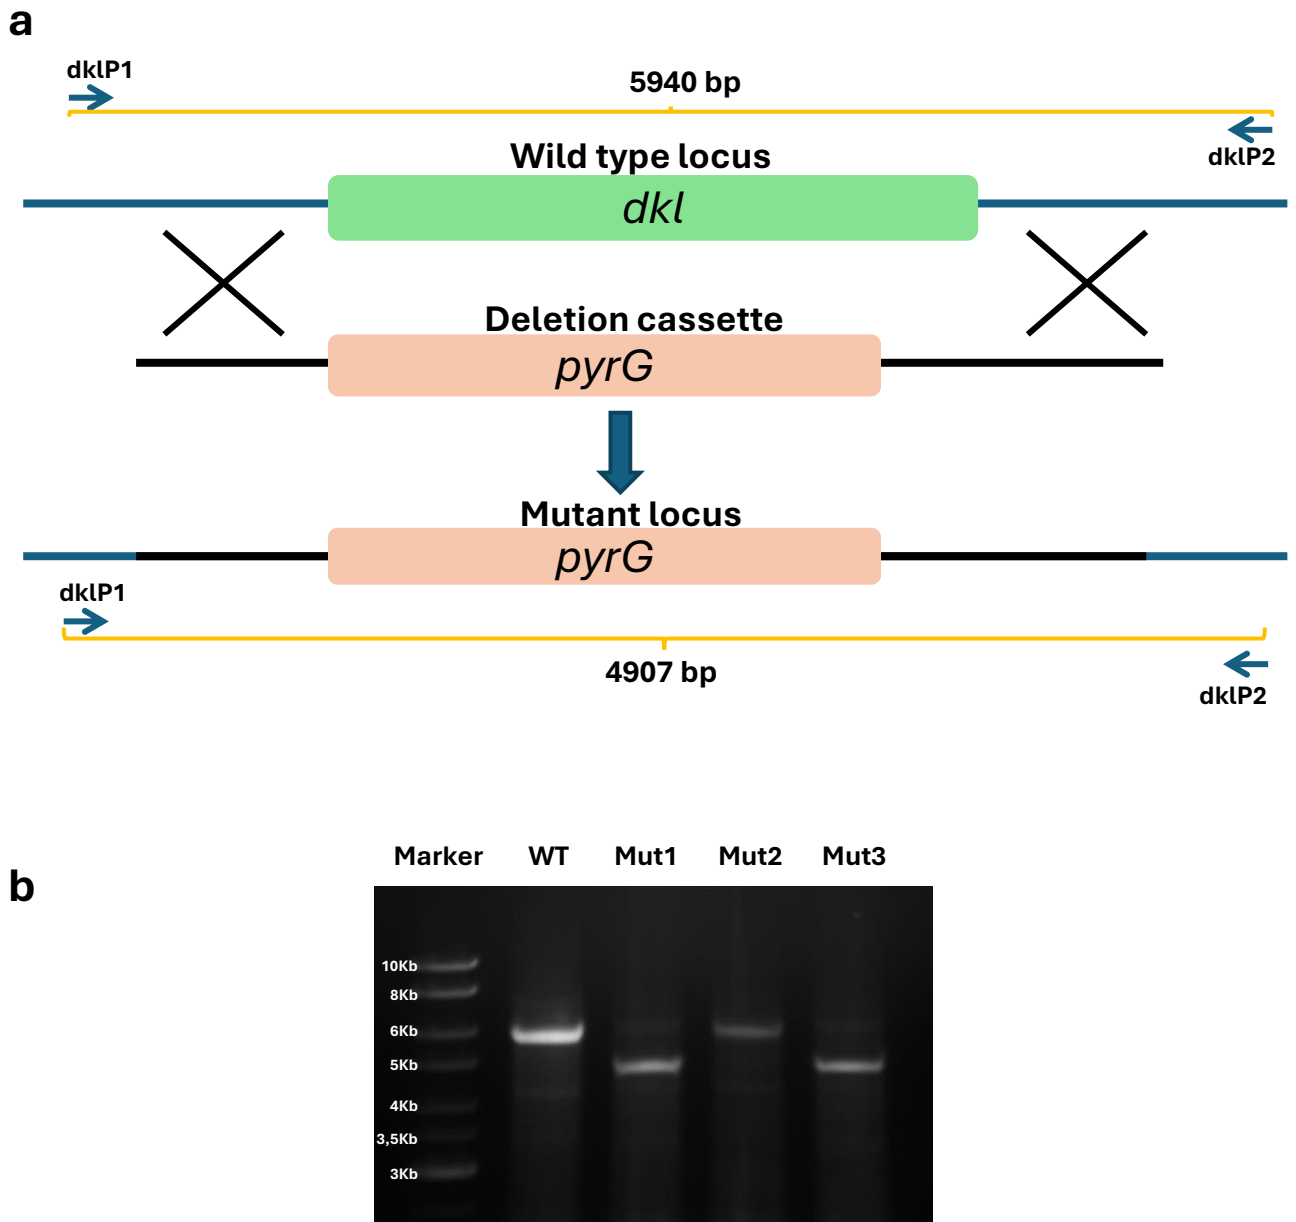

**Supplementary Figure 3. Generation of mutant strains by deletion of the gene *dkl*.** **a** Wild type locus (in green) recombines with the deletion cassette (in orange) which contains the auxotrophy marker *pyrG*. The new mutant locus amplifies a 4907 bp fragment by PCR with the primers *dklP1*/*dklP2*, whereas the wild type locus amplifies a 5940 bp fragment. **b** Validation PCRs from three transformants showed that Mut1 and Mut3 had the correct mutant locus.
