# Supplementary material for: Coordinated Gene Family Evolution Shapes the Genome of Dimorphic Organisms
Source: Research Square preprint supplement (doi:10.21203/rs.3.rs-6393820/v1), 2025-04-08
Supplement: Supplementary file 4 [file 8df0c61a27ab750ca4182373.xlsx]

## Sheet: genes_h2h_dimorphic
Cluster	ID	Neighbor Gene	Expression	Morfology
Cluster 22	1376907	1475750	-7.124256635	Mycelium
Cluster 39	1531745	1138061	3.393897485	Yeast
Cluster 56	1528637	1528630	-2.519908368	Mycelium
Cluster 59	1600607	1545099	5.827727004	Yeast
Cluster 71	1595950	1494709	-2.290909629	Mycelium
Cluster 80	1533294	1533305	-4.154892061	Mycelium
Cluster 82	1553236	1553234	-1.032607515	Mycelium
Cluster 84	1335829	1448945	-5.683698148	Mycelium
Cluster 106	1448945	1335829	-2.689773987	Mycelium
Cluster 109	1458659	1458664	1.325497224	Yeast
Cluster 180	1516978	1516976	1.411466479	Yeast
Cluster 183	1519360	1588502	-4.258175342	Mycelium
Cluster 201	1536516	1536522	2.489117241	Yeast
Cluster 205	1518590	1518596	2.312794605	Yeast
Cluster 212	1501215	1586768	3.190976575	Yeast
Cluster 213	1600907	1548061	-1.136790469	Mycelium
Cluster 233	1510080	1510087	2.947222289	Yeast
Cluster 253	1472681	1472690	-2.129439718	Mycelium
Cluster 270	1530130	1530136	-1.720731269	Mycelium
Cluster 286	1457033	1347260	-4.545287152	Mycelium
Cluster 310	1528036	1528032	-6.440088522	Mycelium
Cluster 311	1340513	1527813	1.097237221	Yeast
Cluster 313	1588338	1387164	1.320565628	Yeast
Cluster 8672	1520146	1520149	3.755849792	Yeast
Cluster 328	1537999	1391973	-3.351132639	Mycelium
Cluster 336	1585975	1492697	-3.93239327	Mycelium
Cluster 343	1562057	1489493	-2.140196184	Mycelium
Cluster 347	1484963	1484966	-1.922006986	Mycelium
Cluster 347	1499263	1499260	-4.776970093	Mycelium
Cluster 360	1497021	1497033	-2.007969924	Mycelium
Cluster 372	1566709	1391507	-1.536163325	Mycelium
Cluster 377	1483665	1594914	-2.345599313	Mycelium
Cluster 391	1528597	1528612	-1.358483242	Mycelium
Cluster 412	1467657	1593413	-4.211880076	Mycelium
Cluster 415	1466356	1466364	-1.356662317	Mycelium
Cluster 430	1395733	1552616	-1.990259414	Mycelium
Cluster 434	1484818	1484816	4.010414471	Yeast
Cluster 492	1599794	1536395	2.867272305	Yeast
Cluster 471	1485399	1379270	-3.318351866	Mycelium
Cluster 485	1513579	1513577	1.659726645	Yeast
Cluster 516	1352752	1378127	-1.62999772	Mycelium
Cluster 519	1522510	1449310	1.388440574	Yeast
Cluster 530	1557673	1032352	-3.517876819	Mycelium
Cluster 537	1501740	1501738	-1.290250426	Mycelium
Cluster 575	1511388	1511393	1.106506638	Yeast
Cluster 598	1442722	1010138	-9.063006878	Mycelium
Cluster 619	1568089	1601029	-4.038901623	Mycelium
Cluster 633	1476152	1476147	-4.233837596	Mycelium
Cluster 636	1533305	1533294	-5.163713519	Mycelium
Cluster 642	1375552	1469038	1.570720109	Yeast
Cluster 644	1542151	1542150	-3.378988786	Mycelium
Cluster 656	1597086	1506917	2.77064392	Yeast
Cluster 696	1529855	1529853	4.006387936	Yeast
Cluster 701	1544678	1544675	-2.209131798	Mycelium
Cluster 708	1505659	1505672	1.152501387	Yeast
Cluster 750	1456624	1456622	6.40249308	Yeast
Cluster 759	1473157	1473161	-2.394906543	Mycelium
Cluster 762	1595084	1485491	-1.664504545	Mycelium
Cluster 764	1169398	1452060	-1.698998641	Mycelium
Cluster 769	1511344	1511347	-4.510406146	Mycelium
Cluster 775	1378127	1352752	-1.213914196	Mycelium
Cluster 804	1553884	1177218	1.438149387	Yeast
Cluster 819	1594929	1445276	-2.307332694	Mycelium
Cluster 823	1536851	1536862	2.24619488	Yeast
Cluster 826	1548700	1548709	-3.346026686	Mycelium
Cluster 854	1467549	1467556	2.560608209	Yeast
Cluster 856	1514503	1514522	-1.267003671	Mycelium
Cluster 898	1539833	1539826	1.555244489	Yeast
Cluster 899	1565843	1526841	1.138643332	Yeast
Cluster 902	1523817	1523822	-1.967231183	Mycelium
Cluster 935	1500658	1586714	-8.539268217	Mycelium
Cluster 997	1551809	1551807	1.979088482	Yeast
Cluster 1012	1356314	1495435	-1.797083472	Mycelium
Cluster 1013	1374151	1463314	-7.899679134	Mycelium
Cluster 1015	1548982	1548977	1.075252865	Yeast
Cluster 1025	1541314	1541311	4.775649604	Yeast
Cluster 1034	1483184	1483176	2.753250544	Yeast
Cluster 1056	1391698	1366356	-1.196185422	Mycelium
Cluster 1080	1594582	1480198	-9.034354704	Mycelium
Cluster 1102	1530268	1599241	-1.890966404	Mycelium
Cluster 1125	1485531	1485518	1.604396667	Yeast
Cluster 1143	1601272	1370120	2.093752818	Yeast
Cluster 1148	1416742	1544569	-1.176807686	Mycelium
Cluster 1151	1354959	1354963	-3.800770382	Mycelium
Cluster 1162	1511848	1564354	-3.576929718	Mycelium
Cluster 1169	1484346	1484351	1.119144497	Yeast
Cluster 1179	1551951	1395537	-1.119269022	Mycelium
Cluster 1181	1503128	1503136	-3.858793395	Mycelium
Cluster 1188	1593413	1467657	-3.756427921	Mycelium
Cluster 1189	1355369	1491458	-3.081401361	Mycelium
Cluster 1197	1541522	1541540	1.049449219	Yeast
Cluster 1243	1536423	1536417	1.713482564	Yeast
Cluster 1253	1445917	1490047	3.430402879	Yeast
Cluster 1274	1506917	1597086	1.583219832	Yeast
Cluster 1285	1479497	1479494	-1.117266459	Mycelium
Cluster 1291	1540682	1540674	1.452155017	Yeast
Cluster 1333	1477485	1477490	1.842929925	Yeast
Cluster 1355	1384248	1358887	-3.746817017	Mycelium
Cluster 1373	1352156	1478363	2.112997405	Yeast
Cluster 1386	1510816	1510814	-1.170246023	Mycelium
Cluster 1389	1469221	1469227	-1.625954536	Mycelium
Cluster 1409	1498689	1498674	-3.233585755	Mycelium
Cluster 1562	1453654	1453651	7.578080906	Yeast
Cluster 1451	1555734	1555746	-3.15870773	Mycelium
Cluster 1467	1516150	1516145	-1.877816215	Mycelium
Cluster 1461	1464356	1464352	1.166967371	Yeast
Cluster 1469	1516145	1516150	-7.677500297	Mycelium
Cluster 7174	1454956	1582431	2.54374312	Yeast
Cluster 1506	1463599	1463601	-7.744266005	Mycelium
Cluster 1509	1467407	1467419	-1.127133243	Mycelium
Cluster 1519	1452120	1549906	1.248848912	Yeast
Cluster 1531	1529057	1529059	1.109082255	Yeast
Cluster 1566	1536417	1536423	2.900757023	Yeast
Cluster 1580	1544675	1544678	-3.864038524	Mycelium
Cluster 1594	1583336	1019783	-1.059304527	Mycelium
Cluster 1599	1415883	1536235	-1.680489966	Mycelium
Cluster 1602	1536522	1536516	1.612309243	Yeast
Cluster 1613	1589336	1364399	-6.421706351	Mycelium
Cluster 1615	1365138	1531626	-1.350669505	Mycelium
Cluster 1627	1473161	1473157	-2.505912889	Mycelium
Cluster 1632	1383244	1383246	-9.440578839	Mycelium
Cluster 1643	1516079	1564778	-5.180184679	Mycelium
Cluster 1673	1517144	1517149	2.618550447	Yeast
Cluster 1680	1598271	1519577	-1.779509347	Mycelium
Cluster 1683	1537817	1537822	-3.312543485	Mycelium
Cluster 1723	1358663	1504804	-1.664132842	Mycelium
Cluster 1740	1513577	1513579	3.823647345	Yeast
Cluster 1777	1549305	1549303	-2.631039849	Mycelium
Cluster 1829	1519850	1519847	1.242874837	Yeast
Cluster 1854	1464414	1431171	-1.116522854	Mycelium
Cluster 1861	1455558	1455546	5.123073651	Yeast
Cluster 1869	1383246	1383244	-5.381865707	Mycelium
Cluster 1875	1391253	1534957	-1.452818113	Mycelium
Cluster 1908	1483768	1483776	3.387032755	Yeast
Cluster 1937	1443812	1469197	-2.121932712	Mycelium
Cluster 1953	1370951	1555165	-4.680817504	Mycelium
Cluster 4324	1461193	1461192	-3.536991383	Mycelium
Cluster 1967	1446740	1497996	3.924239351	Yeast
Cluster 1971	1469359	1469352	-1.635756758	Mycelium
Cluster 1972	1499283	1499290	2.353684788	Yeast
Cluster 1983	1553234	1553236	-1.411715526	Mycelium
Cluster 1995	1537822	1537817	-3.992079885	Mycelium
Cluster 2004	1468184	1468191	-10.90979678	Mycelium
Cluster 2005	1349083	1374450	-3.090747036	Mycelium
Cluster 2019	1541311	1541314	1.971209964	Yeast
Cluster 2027	1535140	1535117	2.800057859	Yeast
Cluster 2048	1519092	1448965	2.513500446	Yeast
Cluster 2061	1496529	1586347	-1.562727624	Mycelium
Cluster 2074	1528032	1528036	-1.894639319	Mycelium
Cluster 2107	1548630	1548640	1.259439291	Yeast
Cluster 2144	1468674	1570897	3.758348947	Yeast
Cluster 2158	1451668	1545916	1.095593759	Yeast
Cluster 2166	1483414	1483422	-2.103173939	Mycelium
Cluster 4911	1506145	1447584	-1.435455586	Mycelium
Cluster 2181	1473055	1350925	3.18978843	Yeast
Cluster 2183	1361204	1588095	-9.34306411	Mycelium
Cluster 2187	1485518	1485531	2.473649056	Yeast
Cluster 2187	1599978	1150217	-1.611797073	Mycelium
Cluster 2232	1595680	1491770	-5.939069077	Mycelium
Cluster 2239	1148843	1366537	-3.52472138	Mycelium
Cluster 2242	1510801	1385506	1.983837255	Yeast
Cluster 2246	1599050	1527921	1.713593346	Yeast
Cluster 2251	1365588	1533581	1.966039996	Yeast
Cluster 2274	1474672	1474666	-5.395068636	Mycelium
Cluster 2276	1525852	1128237	-1.031024224	Mycelium
Cluster 2279	1453634	1001405	-5.578918822	Mycelium
Cluster 2286	1588502	1519360	-8.108903517	Mycelium
Cluster 2314	1466808	1466816	1.769331618	Yeast
Cluster 2333	1531515	1531510	-2.265771481	Mycelium
Cluster 2335	1541540	1541522	1.537971748	Yeast
Cluster 2353	1370120	1601272	1.307365201	Yeast
Cluster 2378	1533700	1365601	1.686279009	Yeast
Cluster 2401	1456582	1456584	1.412503314	Yeast
Cluster 2401	1489536	1489534	-7.848910042	Mycelium
Cluster 2436	1527407	1527413	-3.972913101	Mycelium
Cluster 2439	1366356	1391698	-1.607292586	Mycelium
Cluster 2442	1506663	1506660	-1.332001617	Mycelium
Cluster 2452	1505111	1505112	3.222398342	Yeast
Cluster 2453	1524418	1524425	-1.01096958	Mycelium
Cluster 2455	1355503	1331398	3.072727866	Yeast
Cluster 2455	1533515	1533506	-5.464266083	Mycelium
Cluster 2455	1559204	1461375	9.267883313	Yeast
Cluster 2461	1520518	1520511	1.968110469	Yeast
Cluster 2470	1471890	1471900	-1.858412076	Mycelium
Cluster 2479	1463314	1374151	-1.832593395	Mycelium
Cluster 2489	1502740	1502735	-2.523121912	Mycelium
Cluster 2491	1519048	1519044	4.452626175	Yeast
Cluster 2492	1536862	1536851	2.806401794	Yeast
Cluster 2508	1511347	1511344	-4.019439457	Mycelium
Cluster 2525	1519586	1519581	-7.549684077	Mycelium
Cluster 2535	1474666	1474672	-5.220850677	Mycelium
Cluster 2550	1468936	1468929	2.122916193	Yeast
Cluster 2558	1388838	1524577	1.675537348	Yeast
Cluster 2560	1544569	1416742	-1.859968491	Mycelium
Cluster 2600	1548977	1548982	1.470121611	Yeast
Cluster 2629	1557296	1557293	1.219561232	Yeast
Cluster 2646	1519581	1519586	-2.715859401	Mycelium
Cluster 2648	1564778	1516079	-5.606598703	Mycelium
Cluster 2649	1541792	1156571	-4.371062016	Mycelium
Cluster 2668	1444467	1475924	2.274209235	Yeast
Cluster 2675	1489483	1489486	2.868321678	Yeast
Cluster 2709	1512664	1512663	2.199765554	Yeast
Cluster 2719	1557900	1371392	-2.87762346	Mycelium
Cluster 2721	1354963	1354959	-1.778125084	Mycelium
Cluster 2738	1459363	1459364	4.311098979	Yeast
Cluster 2755	1556846	1556854	-1.922881856	Mycelium
Cluster 2763	1468031	1468027	5.531555436	Yeast
Cluster 2797	1570897	1468674	3.397451608	Yeast
Cluster 2816	1486877	1486866	1.410991519	Yeast
Cluster 2821	1541708	1541717	-2.217103785	Mycelium
Cluster 2825	1496978	1496982	-4.096457715	Mycelium
Cluster 2833	1533987	1439343	3.765242913	Yeast
Cluster 2845	1345849	1556604	-2.390716533	Mycelium
Cluster 2865	1478980	1478969	1.697412981	Yeast
Cluster 2868	1554288	1396117	-2.444137666	Mycelium
Cluster 2890	1502983	1447255	-1.698496903	Mycelium
Cluster 2899	1471652	1471653	4.366906456	Yeast
Cluster 2903	1528630	1528637	-5.670347325	Mycelium
Cluster 2911	1476547	1476551	-2.805842075	Mycelium
Cluster 2924	1518310	1518313	2.389523381	Yeast
Cluster 2952	1516224	1110088	-1.629407407	Mycelium
Cluster 2963	1465479	1465482	-2.034487211	Mycelium
Cluster 2967	1531626	1365138	-2.095191847	Mycelium
Cluster 2978	1327596	1560238	1.853194848	Yeast
Cluster 2996	1411183	1490522	1.016079447	Yeast
Cluster 3000	1525756	1389137	2.823104798	Yeast
Cluster 3007	1599758	1536011	-2.029051501	Mycelium
Cluster 3011	1372654	1457119	-1.444923723	Mycelium
Cluster 3019	1515118	1515115	-1.894638751	Mycelium
Cluster 3051	1590915	1545523	1.766359029	Yeast
Cluster 3074	1503604	1596776	1.009154367	Yeast
Cluster 3075	1528612	1528597	-2.177310052	Mycelium
Cluster 3105	1570085	1461684	-1.737613563	Mycelium
Cluster 3123	1376222	1584109	2.755243767	Yeast
Cluster 3125	1516201	1516197	6.689383922	Yeast
Cluster 3138	1347525	1458152	-5.041280137	Mycelium
Cluster 3152	1469197	1443812	-1.371834661	Mycelium
Cluster 3159	1568132	1549732	2.133265694	Yeast
Cluster 3163	1368904	1591057	1.461530118	Yeast
Cluster 3171	1019783	1583336	-9.585226555	Mycelium
Cluster 3182	1538254	1590236	3.30910394	Yeast
Cluster 3185	1586768	1501215	1.483159809	Yeast
Cluster 3190	1458664	1458659	1.191505588	Yeast
Cluster 3195	1502735	1502740	-4.45349289	Mycelium
Cluster 3227	1128859	1335409	-3.885058144	Mycelium
Cluster 3237	1444527	1476430	-7.035173809	Mycelium
Cluster 3238	1485491	1595084	-1.71531325	Mycelium
Cluster 3277	1457119	1372654	-3.227566543	Mycelium
Cluster 3285	1326364	1351014	2.144115868	Yeast
Cluster 3288	1460464	1442916	-2.053887976	Mycelium
Cluster 3297	1560462	1473880	7.19341187	Yeast
Cluster 3333	1555852	1555854	2.105725656	Yeast
Cluster 3370	1569885	1460200	-6.909281191	Mycelium
Cluster 3390	1586714	1500658	-1.523418042	Mycelium
Cluster 3391	1591057	1368904	1.865600314	Yeast
Cluster 3415	1455227	1372168	-3.52352831	Mycelium
Cluster 3424	1464498	1464505	3.327268841	Yeast
Cluster 3428	1501738	1501740	-1.559698792	Mycelium
Cluster 3429	1464628	1464620	1.517603873	Yeast
Cluster 3451	1446755	1446754	-2.520595483	Mycelium
Cluster 3452	1472337	1444133	-2.209201835	Mycelium
Cluster 3460	1540964	1540966	-1.302594038	Mycelium
Cluster 3462	1555746	1555734	-1.208372315	Mycelium
Cluster 3469	1472690	1472681	-1.152542597	Mycelium
Cluster 3492	1484050	1484053	-1.869427595	Mycelium
Cluster 3497	1598614	1523183	2.533324994	Yeast
Cluster 3502	1463020	1463013	-6.524275392	Mycelium
Cluster 3508	1492697	1585975	-8.933680178	Mycelium
Cluster 3517	1359239	1507157	1.951674732	Yeast
Cluster 3548	1381038	1492673	-1.226860359	Mycelium
Cluster 3567	1455546	1455558	9.238303632	Yeast
Cluster 3571	1504804	1358663	-1.165565102	Mycelium
Cluster 3606	1489493	1562057	-2.296675606	Mycelium
Cluster 3615	1513155	1360710	1.102865184	Yeast
Cluster 3628	1540169	1440052	-1.564773524	Mycelium
Cluster 3641	1461192	1461193	-3.445806879	Mycelium
Cluster 3647	1545916	1451668	1.66392523	Yeast
Cluster 3651	1476147	1476152	-4.761275447	Mycelium
Cluster 3673	1528708	1528706	1.225527347	Yeast
Cluster 3687	1147952	1439679	-1.591911476	Mycelium
Cluster 3696	1396117	1554288	-3.219416599	Mycelium
Cluster 3714	1523846	1523848	2.590599804	Yeast
Cluster 3721	1463755	1374243	1.656570951	Yeast
Cluster 3726	1349781	1467678	1.127271904	Yeast
Cluster 3742	1582431	1454956	1.454610651	Yeast
Cluster 3751	1547824	1547830	-1.025346628	Mycelium
Cluster 3757	1460748	1460753	1.194701157	Yeast
Cluster 3758	1473818	1376476	1.65209369	Yeast
Cluster 3765	1524773	1524768	-7.047957503	Mycelium
Cluster 3807	1452957	1452967	3.19032015	Yeast
Cluster 3811	1452967	1452957	2.818438621	Yeast
Cluster 3820	1522275	1362933	1.708935293	Yeast
Cluster 3846	1486703	1486686	-2.252562	Mycelium
Cluster 3855	1467079	1467081	1.735458549	Yeast
Cluster 3861	1536870	1536873	-2.374431935	Mycelium
Cluster 3913	1439679	1147952	-2.16772081	Mycelium
Cluster 3931	1531888	1531893	1.763530646	Yeast
Cluster 3937	1336367	1524729	-2.434004214	Mycelium
Cluster 3949	1396025	1396020	2.744447237	Yeast
Cluster 3976	1586347	1496529	-5.74379002	Mycelium
Cluster 3990	1508554	1587461	-7.596953661	Mycelium
Cluster 4010	1344170	1551795	-1.494002851	Mycelium
Cluster 4027	1551879	1551875	3.506767671	Yeast
Cluster 4039	1538212	1538215	3.832900373	Yeast
Cluster 4047	1496835	1496831	-1.271199805	Mycelium
Cluster 4052	1553343	1568504	-2.751350863	Mycelium
Cluster 4054	1594914	1483665	-7.112948254	Mycelium
Cluster 4001	1499016	1499013	1.209796834	Yeast
Cluster 4103	1463013	1463020	-1.564313037	Mycelium
Cluster 4104	1469038	1375552	1.128723475	Yeast
Cluster 4135	1387688	1519792	1.694384786	Yeast
Cluster 4142	1549906	1452120	2.217308759	Yeast
Cluster 4144	1552096	1568382	1.625958394	Yeast
Cluster 4156	1544020	1544017	-1.637421986	Mycelium
Cluster 4170	1509442	1509434	5.134948104	Yeast
Cluster 4190	1491458	1355369	-1.230454622	Mycelium
Cluster 4191	1499290	1499283	2.821023509	Yeast
Cluster 4194	1524471	1336474	-3.380169208	Mycelium
Cluster 4195	1531893	1531888	1.131587957	Yeast
Cluster 4201	1110088	1516224	-1.159270936	Mycelium
Cluster 4203	1370040	1551373	-7.113771896	Mycelium
Cluster 4220	1503235	1503237	1.808816165	Yeast
Cluster 4224	1555165	1370951	-2.80259828	Mycelium
Cluster 4251	1483176	1483184	2.401631417	Yeast
Cluster 4274	1466816	1466808	1.687916277	Yeast
Cluster 4284	1466541	1466543	1.258182425	Yeast
Cluster 4338	1347260	1457033	-3.339306154	Mycelium
Cluster 4347	1351014	1326364	7.253666805	Yeast
Cluster 4378	1360710	1513155	2.178646817	Yeast
Cluster 4378	1448086	1510844	-1.825285698	Mycelium
Cluster 4384	1530667	1530668	1.578601848	Yeast
Cluster 4403	1557293	1557296	1.218186741	Yeast
Cluster 4426	1601029	1568089	-3.416249803	Mycelium
Cluster 4446	1467556	1467549	2.801896029	Yeast
Cluster 4473	1469352	1469359	-3.288720692	Mycelium
Cluster 4493	1374450	1349083	-3.287512314	Mycelium
Cluster 4498	1498674	1498689	-1.996639	Mycelium
Cluster 4517	1496831	1496835	-1.616956828	Mycelium
Cluster 4535	1573879	1380664	-3.292201856	Mycelium
Cluster 4539	1325814	1324878	4.899689191	Yeast
Cluster 4539	1339894	1566001	4.796966025	Yeast
Cluster 4545	1480198	1594582	-10.33044835	Mycelium
Cluster 4549	1511524	1102636	-3.773560539	Mycelium
Cluster 4555	1380664	1573879	-3.008265027	Mycelium
Cluster 4561	1538711	1538719	-2.662670543	Mycelium
Cluster 4586	1511833	1360410	2.169281817	Yeast
Cluster 4605	1544017	1544020	-1.576762076	Mycelium
Cluster 4608	1496432	1496428	4.430240302	Yeast
Cluster 4609	1461375	1559204	7.136358352	Yeast
Cluster 4609	1533506	1533515	-5.518237735	Mycelium
Cluster 4619	1483422	1483414	-10.08799924	Mycelium
Cluster 4640	1516704	1386939	2.340802278	Yeast
Cluster 4643	1556444	1556448	1.624842502	Yeast
Cluster 4656	1546506	1546512	-1.096781319	Mycelium
Cluster 4669	1521023	1521024	2.673532733	Yeast
Cluster 4672	1555854	1555852	1.187915865	Yeast
Cluster 4712	1545099	1600607	2.106078492	Yeast
Cluster 4718	1348102	1460431	-1.775266597	Mycelium
Cluster 4723	1387164	1588338	2.2402022	Yeast
Cluster 4724	1447255	1502983	-2.046783736	Mycelium
Cluster 4756	1551524	1551529	1.108374193	Yeast
Cluster 4770	1484053	1484050	-2.216369035	Mycelium
Cluster 4773	1551875	1551879	1.339901375	Yeast
Cluster 4793	1534004	1534011	1.587661908	Yeast
Cluster 4817	1520511	1520518	2.096920886	Yeast
Cluster 4827	1495268	1495263	-1.352338384	Mycelium
Cluster 4846	1378072	1480494	-3.355415751	Mycelium
Cluster 4856	1518313	1518310	1.056326993	Yeast
Cluster 4868	1556854	1556846	-4.094562966	Mycelium
Cluster 4878	1463601	1463599	-2.307602212	Mycelium
Cluster 4908	1599094	1566005	-1.720372194	Mycelium
Cluster 4910	1346179	1429877	-1.991612596	Mycelium
Cluster 4911	1505851	1358920	1.37647956	Yeast
Cluster 4926	1541014	1416378	-2.514104894	Mycelium
Cluster 4949	1471900	1471890	-2.238349295	Mycelium
Cluster 4976	1494428	1494432	2.396822729	Yeast
Cluster 5003	1391836	1537405	1.363834207	Yeast
Cluster 5007	1445276	1594929	-1.627414032	Mycelium
Cluster 5017	1463347	1463345	2.520501547	Yeast
Cluster 5021	1467081	1467079	6.440030718	Yeast
Cluster 5026	1540674	1540682	4.732221182	Yeast
Cluster 5030	1388014	1521050	-2.053413505	Mycelium
Cluster 5042	1351554	1475916	5.562272784	Yeast
Cluster 5042	1475916	1351554	2.248630188	Yeast
Cluster 5050	1532615	1365349	1.158095889	Yeast
Cluster 5059	1463345	1463347	3.335421896	Yeast
Cluster 5081	1510087	1510080	2.259911362	Yeast
Cluster 5105	1519577	1598271	-2.180421221	Mycelium
Cluster 5127	1032352	1557673	-2.795739751	Mycelium
Cluster 5129	1361253	1361249	-1.23436845	Mycelium
Cluster 5136	1438416	1525793	-2.07423845	Mycelium
Cluster 5197	1548709	1548700	-2.581357935	Mycelium
Cluster 5262	1358887	1384248	-1.1057779	Mycelium
Cluster 5282	1523822	1523817	-5.478822516	Mycelium
Cluster 5292	1467502	1467494	2.053251949	Yeast
Cluster 5301	1102636	1511524	-3.417195039	Mycelium
Cluster 5306	1494320	1494316	1.598883902	Yeast
Cluster 5312	1497996	1446740	4.082815206	Yeast
Cluster 5315	1477123	1584509	-3.950757804	Mycelium
Cluster 5332	1499013	1499016	1.197849594	Yeast
Cluster 5344	1484542	1573006	-1.446922692	Mycelium
Cluster 5350	1551373	1370040	-1.240106088	Mycelium
Cluster 5399	1469227	1469221	-2.362696226	Mycelium
Cluster 5414	1442680	1458306	1.463649157	Yeast
Cluster 5423	1534261	1589857	1.674509328	Yeast
Cluster 5431	1466364	1466356	-4.071525038	Mycelium
Cluster 5437	1524577	1388838	6.222282567	Yeast
Cluster 5451	1468027	1468031	4.347433494	Yeast
Cluster 5458	1526841	1565843	2.103064693	Yeast
Cluster 5460	1548640	1548630	1.041665347	Yeast
Cluster 5472	1536235	1415883	-5.568748217	Mycelium
Cluster 5489	1599241	1530268	-8.188089746	Mycelium
Cluster 5517	1537405	1391836	6.319612963	Yeast
Cluster 5526	1396020	1396025	2.113121132	Yeast
Cluster 5550	1505703	1358871	-1.805467496	Mycelium
Cluster 5568	1523848	1523846	5.038745401	Yeast
Cluster 5585	1389137	1525756	4.990062536	Yeast
Cluster 5611	1531510	1531515	-2.226097925	Mycelium
Cluster 5636	1527813	1340513	1.644907095	Yeast
Cluster 5655	1358871	1505703	-4.989932699	Mycelium
Cluster 5656	1362933	1522275	1.234909818	Yeast
Cluster 5664	1529853	1529855	4.049294325	Yeast
Cluster 5670	1150217	1599978	-1.431923001	Mycelium
Cluster 5678	1544870	1544868	1.936654928	Yeast
Cluster 5683	1552616	1395733	-8.282076621	Mycelium
Cluster 5685	1385506	1510801	3.483245438	Yeast
Cluster 5692	1587461	1508554	-1.376883968	Mycelium
Cluster 5693	1377098	1042034	-5.747115947	Mycelium
Cluster 5703	1538719	1538711	-2.412297351	Mycelium
Cluster 5704	1524435	1524442	5.341308657	Yeast
Cluster 5724	1507157	1359239	2.509234616	Yeast
Cluster 5744	1510844	1448086	-3.472391479	Mycelium
Cluster 5753	1416378	1541014	-2.790804434	Mycelium
Cluster 5757	1482382	1378526	-1.778213354	Mycelium
Cluster 5764	1546254	1394045	3.805809311	Yeast
Cluster 5767	1589857	1534261	1.755242358	Yeast
Cluster 5790	1527413	1527407	-1.851958769	Mycelium
Cluster 5794	1586864	1586863	-2.209307102	Mycelium
Cluster 5798	1353499	1324337	-2.398709109	Mycelium
Cluster 5833	1517235	1517232	2.831603307	Yeast
Cluster 5833	1528484	1528481	2.346083449	Yeast
Cluster 5839	1465738	1465736	-4.491654993	Mycelium
Cluster 5845	1550061	1550058	3.937794443	Yeast
Cluster 5857	1510814	1510816	-1.278992067	Mycelium
Cluster 5872	1495417	1495413	-3.919531708	Mycelium
Cluster 5895	1545523	1590915	1.447010621	Yeast
Cluster 5902	1519847	1519850	1.429695949	Yeast
Cluster 5907	1117019	1519623	1.211027522	Yeast
Cluster 5908	1366537	1148843	-6.525770358	Mycelium
Cluster 5915	1486866	1486877	1.588317596	Yeast
Cluster 5922	1566005	1599094	-4.723271667	Mycelium
Cluster 5931	1372168	1455227	-2.640188832	Mycelium
Cluster 5953	1177218	1553884	1.542461494	Yeast
Cluster 5969	1347705	1458814	2.621266243	Yeast
Cluster 5982	1128237	1525852	-3.423479926	Mycelium
Cluster 5983	1512204	1385863	-1.788272785	Mycelium
Cluster 5988	1522732	1363063	1.024555696	Yeast
Cluster 6003	1556448	1556444	4.83400338	Yeast
Cluster 6069	1386939	1516704	1.09849887	Yeast
Cluster 6089	1447774	1332793	-2.936487672	Mycelium
Cluster 6095	1523940	1523934	1.922727902	Yeast
Cluster 6110	1600630	1368463	1.435417178	Yeast
Cluster 6143	1361249	1361253	-1.117409191	Mycelium
Cluster 6161	1495413	1495417	-1.945072045	Mycelium
Cluster 6169	1364399	1589336	-5.292789143	Mycelium
Cluster 6170	1365349	1532615	2.019726404	Yeast
Cluster 6179	1495435	1356314	-2.351778903	Mycelium
Cluster 6181	1512663	1512664	3.55692638	Yeast
Cluster 6211	1511393	1511388	2.710289496	Yeast
Cluster 6228	1561039	1479544	2.960300657	Yeast
Cluster 6236	1489870	1445903	-3.332688879	Mycelium
Cluster 6256	1524425	1524418	-3.366762823	Mycelium
Cluster 6266	1511240	1511243	-2.339768731	Mycelium
Cluster 6270	1336474	1524471	-6.872744575	Mycelium
Cluster 6271	1429968	1346373	2.715831401	Yeast
Cluster 6279	1480494	1378072	-2.006525836	Mycelium
Cluster 6281	1533581	1365588	1.279491149	Yeast
Cluster 6301	1516197	1516201	9.413558714	Yeast
Cluster 6305	1335409	1128859	-6.429872162	Mycelium
Cluster 6315	1540966	1540964	-4.490659771	Mycelium
Cluster 6346	1512307	1512295	3.11362557	Yeast
Cluster 6360	1341498	1545955	-3.210875825	Mycelium
Cluster 6374	1517215	1517212	-1.567721695	Mycelium
Cluster 6375	1536395	1599794	1.670200764	Yeast
Cluster 6376	1573006	1484542	-1.468670815	Mycelium
Cluster 6385	1502080	1383337	2.557899164	Yeast
Cluster 6417	1447330	1503668	-10.12844239	Mycelium
Cluster 6419	1001405	1453634	-6.526040419	Mycelium
Cluster 6423	1378526	1482382	-8.483776168	Mycelium
Cluster 6426	1446232	1493019	-4.284156147	Mycelium
Cluster 6469	1539826	1539833	1.162382366	Yeast
Cluster 6481	1516976	1516978	1.382674552	Yeast
Cluster 6497	1459039	1558964	-5.168090308	Mycelium
Cluster 6518	1546512	1546506	-2.284127051	Mycelium
Cluster 6528	1487776	1487786	2.300259863	Yeast
Cluster 6535	1541717	1541708	-1.018669492	Mycelium
Cluster 6539	1476430	1444527	-8.948158103	Mycelium
Cluster 6540	1542150	1542151	-1.19949592	Mycelium
Cluster 6541	1579272	1450769	-3.679676743	Mycelium
Cluster 6560	1519792	1387688	3.234577816	Yeast
Cluster 6571	1524153	1524147	3.842807747	Yeast
Cluster 6584	1493019	1446232	-1.902843407	Mycelium
Cluster 6586	1496428	1496432	2.777821476	Yeast
Cluster 6598	1374243	1463755	1.515234638	Yeast
Cluster 6603	1569326	1407619	5.664178108	Yeast
Cluster 6608	1391507	1566709	-9.936852965	Mycelium
Cluster 6624	1521024	1521023	2.064952951	Yeast
Cluster 6651	1429877	1346179	-1.101269371	Mycelium
Cluster 6655	1490880	1411219	-5.97626144	Mycelium
Cluster 6657	1524729	1336367	-2.051802237	Mycelium
Cluster 6708	1378752	1483321	-3.615550506	Mycelium
Cluster 6709	1535117	1535140	3.026945975	Yeast
Cluster 6710	1460431	1348102	-2.21070879	Mycelium
Cluster 6720	1000774	1453284	1.423149817	Yeast
Cluster 6722	1458461	1458460	-1.397315191	Mycelium
Cluster 6725	1471653	1471652	2.126624026	Yeast
Cluster 6734	1564354	1511848	-5.365340964	Mycelium
Cluster 6737	1596776	1503604	2.070690095	Yeast
Cluster 6740	1491770	1595680	-5.502170982	Mycelium
Cluster 6741	1468191	1468184	-9.700699105	Mycelium
Cluster 6748	1517232	1517235	2.871881035	Yeast
Cluster 6759	1490047	1445917	1.158489277	Yeast
Cluster 6773	1527921	1599050	2.290552419	Yeast
Cluster 6784	1385863	1512204	-2.596979382	Mycelium
Cluster 6796	1391973	1537999	-7.096902847	Mycelium
Cluster 6829	1483776	1483768	3.681144541	Yeast
Cluster 6861	1515115	1515118	-2.949300977	Mycelium
Cluster 6868	1010138	1442722	-7.072565966	Mycelium
Cluster 6873	1461684	1570085	-9.028015799	Mycelium
Cluster 6924	1439343	1533987	1.721063815	Yeast
Cluster 6930	1528481	1528484	1.015708253	Yeast
Cluster 6933	1551795	1344170	-1.429359133	Mycelium
Cluster 6966	1331398	1355503	5.793442902	Yeast
Cluster 6974	1517149	1517144	4.954739704	Yeast
Cluster 7011	1368463	1600630	3.865412738	Yeast
Cluster 7021	1525793	1438416	-1.46521377	Mycelium
Cluster 7022	1538143	1538145	-6.597936449	Mycelium
Cluster 7030	1407619	1569326	3.379138736	Yeast
Cluster 7115	1503379	1358291	1.318652247	Yeast
Cluster 7126	1346373	1429968	1.629411204	Yeast
Cluster 7136	1515216	1515208	1.244714669	Yeast
Cluster 7148	1487786	1487776	1.055065047	Yeast
Cluster 7153	1511243	1511240	-1.892658282	Mycelium
Cluster 7154	1514522	1514503	-1.390957714	Mycelium
Cluster 7155	1371392	1557900	-1.44602525	Mycelium
Cluster 7161	1294740	1555551	1.011859991	Yeast
Cluster 7182	1383337	1502080	1.417436443	Yeast
Cluster 7185	1458306	1442680	2.451802177	Yeast
Cluster 7192	1586863	1586864	-1.447547299	Mycelium
Cluster 7201	1496982	1496978	-3.239228715	Mycelium
Cluster 7219	1584109	1376222	2.209280138	Yeast
Cluster 7228	1477490	1477485	1.636734958	Yeast
Cluster 7236	1338814	1147435	4.743401203	Yeast
Cluster 7243	1484351	1484346	2.87338423	Yeast
Cluster 7243	1503237	1503235	2.413563523	Yeast
Cluster 7245	1549303	1549305	-1.066371865	Mycelium
Cluster 7282	1467419	1467407	-1.865963042	Mycelium
Cluster 7301	1499826	1499830	1.693838642	Yeast
Cluster 7303	1524147	1524153	2.640025615	Yeast
Cluster 7305	1548061	1600907	-1.169307673	Mycelium
Cluster 7325	1478363	1352156	2.235231795	Yeast
Cluster 7326	1509434	1509442	1.241646729	Yeast
Cluster 7327	1529059	1529057	1.320592885	Yeast
Cluster 7332	1568504	1553343	-2.27052158	Mycelium
Cluster 7368	1519044	1519048	1.73831682	Yeast
Cluster 7371	1549732	1568132	3.017326995	Yeast
Cluster 7380	1492673	1381038	-1.058624467	Mycelium
Cluster 7425	1530136	1530130	-1.624981853	Mycelium
Cluster 7426	1538145	1538143	-4.541659102	Mycelium
Cluster 7453	1363063	1522732	1.497569653	Yeast
Cluster 7454	1395537	1551951	-7.728793849	Mycelium
Cluster 7460	1494268	1494253	2.907054299	Yeast
Cluster 7460	1526250	1526248	2.178105422	Yeast
Cluster 7486	1486260	1486264	2.06103834	Yeast
Cluster 7488	1499830	1499826	4.176261085	Yeast
Cluster 7493	1156571	1541792	-1.4341442	Mycelium
Cluster 7511	1332793	1447774	-3.008120378	Mycelium
Cluster 7523	1506660	1506663	-1.624014828	Mycelium
Cluster 7527	1590236	1538254	1.130005211	Yeast
Cluster 7533	1522550	1522544	-6.273824778	Mycelium
Cluster 7536	1456584	1456582	1.82546268	Yeast
Cluster 7536	1489534	1489536	-6.032326922	Mycelium
Cluster 7547	1489486	1489483	2.123549076	Yeast
Cluster 7551	1483321	1378752	-1.936065226	Mycelium
Cluster 7561	1446754	1446755	-6.309141938	Mycelium
Cluster 7601	1486264	1486260	1.360192895	Yeast
Cluster 7626	1456622	1456624	6.979850098	Yeast
Cluster 7643	1520149	1520146	4.353813412	Yeast
Cluster 7644	1453651	1453654	7.164887676	Yeast
Cluster 7650	1352741	1378111	-1.107099986	Mycelium
Cluster 7652	1379270	1485399	-1.293277322	Mycelium
Cluster 7662	1588095	1361204	-8.784829888	Mycelium
Cluster 7666	1471082	1471086	-2.26408829	Mycelium
Cluster 7705	1495263	1495268	-2.597373208	Mycelium
Cluster 7707	1510097	1436541	1.960759703	Yeast
Cluster 7709	1515548	1515547	8.398356439	Yeast
Cluster 7719	1484816	1484818	4.735575904	Yeast
Cluster 7739	1551807	1551809	2.893315162	Yeast
Cluster 7744	1464620	1464628	1.089245446	Yeast
Cluster 7746	1499260	1499263	-3.593621923	Mycelium
Cluster 7753	1360410	1511833	2.743818922	Yeast
Cluster 7766	1365601	1533700	7.896378827	Yeast
Cluster 7771	1458814	1347705	3.280663211	Yeast
Cluster 7774	1519623	1117019	1.309469962	Yeast
Cluster 7778	1460200	1569885	-1.725241943	Mycelium
Cluster 7794	1560238	1327596	2.177271548	Yeast
Cluster 7797	1358291	1503379	1.053575151	Yeast
Cluster 7801	1475924	1444467	1.809367066	Yeast
Cluster 7808	1138061	1531745	2.807983178	Yeast
Cluster 7812	1411219	1490880	-5.485549653	Mycelium
Cluster 7818	1465736	1465738	-3.257682781	Mycelium
Cluster 7820	1478969	1478980	2.048533747	Yeast
Cluster 7843	1448965	1519092	2.202867444	Yeast
Cluster 7846	1486686	1486703	-1.712013112	Mycelium
Cluster 7847	1494253	1494268	2.092402602	Yeast
Cluster 7847	1526248	1526250	1.849684858	Yeast
Cluster 7854	1442916	1460464	-1.662075537	Mycelium
Cluster 7856	1458152	1347525	-4.062320586	Mycelium
Cluster 7881	1301999	1451707	-1.646611079	Mycelium
Cluster 7901	1458460	1458461	-2.455530262	Mycelium
Cluster 7927	1515547	1515548	7.103633364	Yeast
Cluster 7941	1533872	1533864	6.495499594	Yeast
Cluster 7948	1350925	1473055	1.277141072	Yeast
Cluster 7959	1555551	1294740	2.555183258	Yeast
Cluster 7968	1530668	1530667	1.207302447	Yeast
Cluster 8009	1536011	1599758	-2.870942962	Mycelium
Cluster 8043	1532147	1532156	3.112975187	Yeast
Cluster 8067	1464505	1464498	2.197924162	Yeast
Cluster 8069	1479494	1479497	-1.239561615	Mycelium
Cluster 8071	1503136	1503128	-1.843019075	Mycelium
Cluster 8080	1505112	1505111	2.52551677	Yeast
Cluster 8087	1551529	1551524	1.335821934	Yeast
Cluster 8098	1503668	1447330	-2.843766402	Mycelium
Cluster 8118	1544868	1544870	2.735762245	Yeast
Cluster 8136	1471086	1471082	-2.57418022	Mycelium
Cluster 8140	1517212	1517215	-1.012877903	Mycelium
Cluster 8153	1466820	1466826	1.204782866	Yeast
Cluster 8157	1518596	1518590	1.539711058	Yeast
Cluster 8158	1521050	1388014	-1.931252513	Mycelium
Cluster 8187	1468525	1375392	-1.145947333	Mycelium
Cluster 8213	1394045	1546254	2.230926939	Yeast
Cluster 8213	1449310	1522510	4.652140556	Yeast
Cluster 8222	1324337	1353499	-1.374530358	Mycelium
Cluster 8224	1378111	1352741	-1.083306243	Mycelium
Cluster 8237	1497033	1497021	-2.167880189	Mycelium
Cluster 8237	1520803	1520795	-1.596388851	Mycelium
Cluster 8237	1520824	1520832	1.524179165	Yeast
Cluster 8239	1538215	1538212	4.732058602	Yeast
Cluster 8302	1467494	1467502	3.53481022	Yeast
Cluster 8305	1533864	1533872	1.21404539	Yeast
Cluster 8332	1556604	1345849	-2.270717936	Mycelium
Cluster 8339	1465482	1465479	-1.598372527	Mycelium
Cluster 8341	1473880	1560462	3.313724266	Yeast
Cluster 8346	1536873	1536870	-2.422636179	Mycelium
Cluster 8351	1520795	1520803	-2.142376903	Mycelium
Cluster 8351	1520832	1520824	1.865391236	Yeast
Cluster 8411	1524442	1524435	3.783681398	Yeast
Cluster 8445	1568382	1552096	2.82512924	Yeast
Cluster 8454	1524768	1524773	-1.160058433	Mycelium
Cluster 8471	1534957	1391253	-1.409795301	Mycelium
Cluster 8476	1475750	1376907	-1.706518176	Mycelium
Cluster 8485	1440052	1540169	-3.738674452	Mycelium
Cluster 8487	1466543	1466541	2.759874014	Yeast
Cluster 8527	1447584	1506145	-4.668639848	Mycelium
Cluster 8543	1375392	1468525	-1.105952628	Mycelium
Cluster 8561	1494709	1595950	-1.37776058	Mycelium
Cluster 8569	1586247	1446501	-3.475263248	Mycelium
Cluster 8573	1358920	1505851	1.464733365	Yeast
Cluster 8576	1459364	1459363	1.13191206	Yeast
Cluster 8581	1483066	1483069	1.909938815	Yeast
Cluster 8587	1584509	1477123	-1.492219369	Mycelium
Cluster 8593	1490522	1411183	1.053495707	Yeast
Cluster 8604	1451707	1301999	-1.639061912	Mycelium
Cluster 8606	1494316	1494320	1.581313453	Yeast
Cluster 8626	1550058	1550061	1.483261038	Yeast
Cluster 8629	1468929	1468936	2.131506069	Yeast
Cluster 8632	1445903	1489870	-5.95252344	Mycelium
Cluster 8643	1444133	1472337	-6.091532504	Mycelium
Cluster 8649	1512396	1512393	1.492679495	Yeast
Cluster 8651	1547830	1547824	-2.342459944	Mycelium
Cluster 8654	1324878	1325814	5.012379913	Yeast
Cluster 8654	1566001	1339894	4.299753983	Yeast
Cluster 8666	1476551	1476547	-2.946971735	Mycelium
Cluster 8685	1466826	1466820	2.142968621	Yeast
Cluster 8689	1494432	1494428	1.487025638	Yeast
Cluster 8696	1460753	1460748	1.826322186	Yeast
Cluster 8698	1505672	1505659	1.766563867	Yeast
Cluster 8699	1515208	1515216	3.43629702	Yeast
Cluster 8729	1452060	1169398	-4.552547321	Mycelium
Cluster 8731	1467678	1349781	1.682575369	Yeast
Cluster 8733	1483069	1483066	1.836972256	Yeast
Cluster 8744	1446501	1586247	-8.493982035	Mycelium
Cluster 8751	1147435	1338814	2.462493988	Yeast
Cluster 8760	1512393	1512396	2.239989747	Yeast
Cluster 8763	1042034	1377098	-3.880365619	Mycelium
Cluster 8767	1431171	1464414	-2.007117456	Mycelium
Cluster 8803	1484966	1484963	-2.645523043	Mycelium
Cluster 8819	1523183	1598614	5.839272767	Yeast
Cluster 8847	1522544	1522550	-1.102835383	Mycelium
Cluster 8855	1453284	1000774	2.338321696	Yeast
Cluster 8859	1479544	1561039	1.823623502	Yeast
Cluster 8869	1376476	1473818	1.59614278	Yeast
Cluster 8895	1545955	1341498	-3.382057579	Mycelium
Cluster 8907	1436541	1510097	2.059038868	Yeast
Cluster 8920	1528706	1528708	3.860227273	Yeast
Cluster 8923	1512295	1512307	2.463112539	Yeast
Cluster 8938	1532156	1532147	5.186385611	Yeast
Cluster 8938	1558964	1459039	-1.347769504	Mycelium
Cluster 8950	1450769	1579272	-3.903144487	Mycelium
Cluster 8956	1464352	1464356	2.106133122	Yeast
Cluster 8965	1523934	1523940	2.746828381	Yeast
Cluster 8975	1534011	1534004	2.983174868	Yeast
