# Supplementary material for: Coordinated Gene Family Evolution Shapes the Genome of Dimorphic Organisms
Source: Research Square preprint supplement (doi:10.21203/rs.3.rs-6393820/v1), 2025-04-08
Supplement: Supplementary file 4 [file b3f760a8175d5d619be44462.pdf]

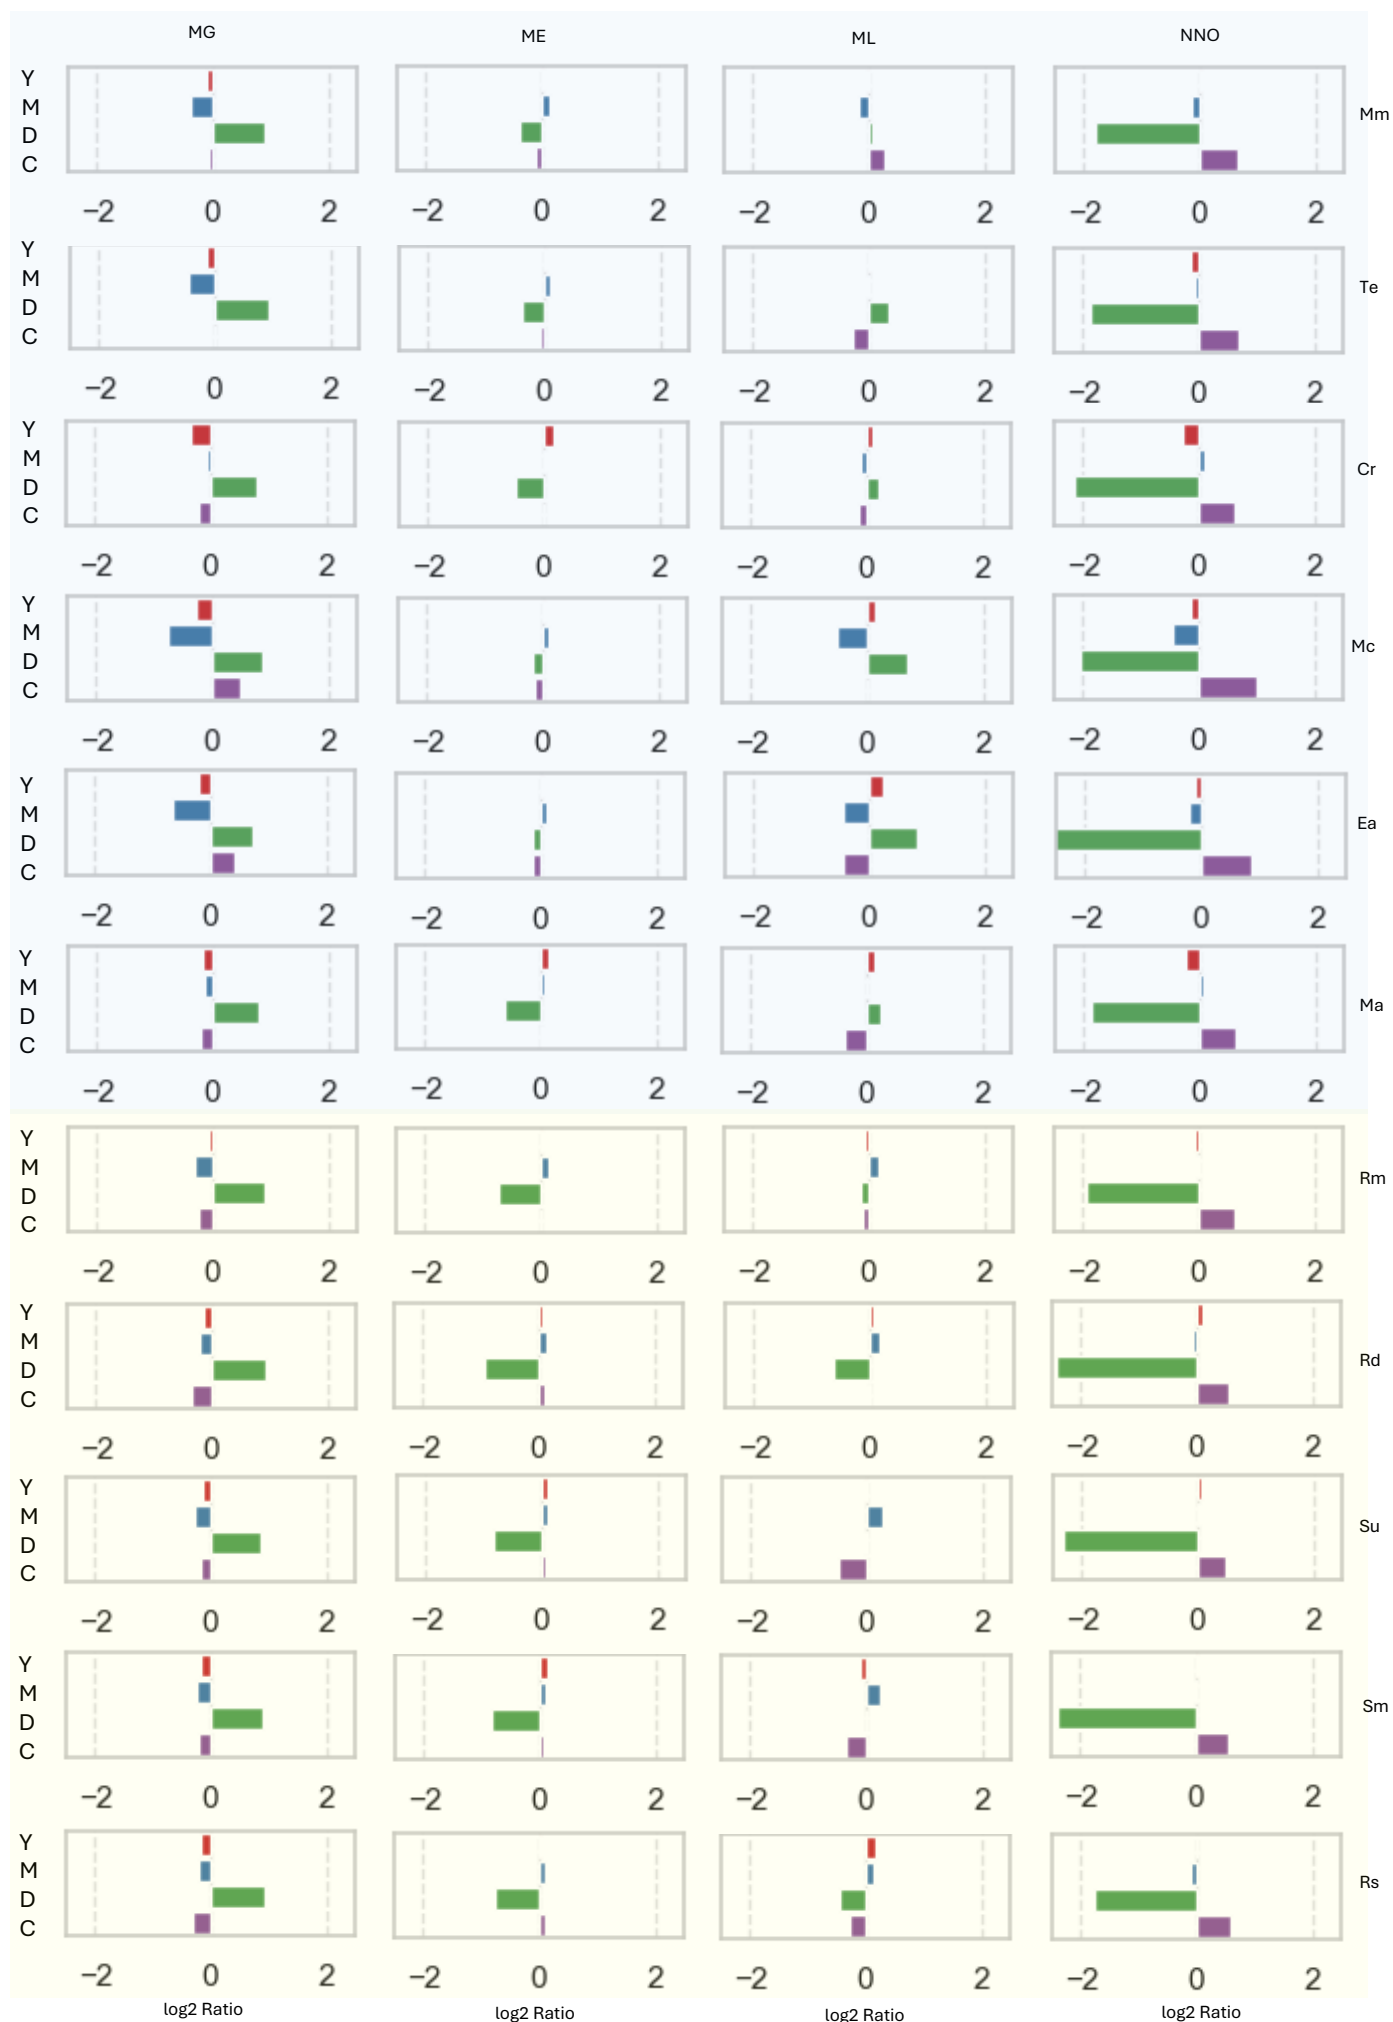

**Supplementary Figure 7. Conservation of dimorphic paralogous gene families in Mucorales.**

Comparison of orthogroups defined in *M. lusitanicus* with orthogroups in *Mucor circinelloides* (Mc), *Rhizopus microsporus* (Rm), *Rhizopus delemar* (Rd), *Ellisomyces anomalus* (Ea), *Mucor circinelloides* (Mc), *Thamnidium elegans* (Te), *Mucor mucedo* (Mm), *Cokeromyces recurvatus* (Cv), *Mycotypha africana* (Ma), *Sporodiniella umbellata* (Su), *Rhizopus stolonifer* (Rs), and *Syzygites megalocarpus* (Sm). Morphological and functional categories: Yeast (L), Mycelium (M), Constitutive (C), and Dimorphic (D, genes with at least one paralog that is differentially expressed). Orthogroups: MG (orthogroups where *Mucor lusitanicus* has a greater number of components than the compared organism), ME (orthogroups where *Mucor lusitanicus* has the same number of components as the compared organism), and ML (orthogroups where *Mucor lusitanicus* has fewer components than the compared organism), NNO (genes that were not assigned to any orthogroup). In blue, Mucoraceae and Mycophataceae; in yellow, Rhizopodaceae.
