# Supplementary material for: Coordinated Gene Family Evolution Shapes the Genome of Dimorphic Organisms
Source: Research Square preprint supplement (doi:10.21203/rs.3.rs-6393820/v1), 2025-04-08
Supplement: Supplementary file 5 [file bf308ce6ed67a1a43b06862d.xlsx]

## Sheet: Gene Families
Cluster	ID	Expression	Morfology	Protein	NumberProteins
Cluster 0	1447868	-6.80771	Mycelium	Mucci_1447868	1
Cluster 1	1362638	-2.02403	Mycelium	Mucci_1362638	1
Cluster 2	1452460	-2.24436	Mycelium	Mucci_1452460	1
Cluster 3	1342161	-7.97466	Mycelium	Mucci_1342161	1
Cluster 5	1598183	0	Not_differential	Mucci_1598183	1
Cluster 6	1448453	-4.17755	Mycelium	Mucci_1448453	1
Cluster 8	1357100	0	Not_differential	Mucci_1357100	1
Cluster 9	1562135	1.41127	Yeast	Mucci_1562135	1
Cluster 10	1445789	-1.66763	Mycelium	Mucci_1445789	1
Cluster 11	1359189	-1.46925	Mycelium	Mucci_1359189	1
Cluster 12	1391810	-1.34101	Mycelium	Mucci_1391810	1
Cluster 13	1451834	-7.51199	Mycelium	Mucci_1451834	1
Cluster 14	1474846	6.08291	Yeast	Mucci_1474846	1
Cluster 16	1142208	1.40557	Yeast	Mucci_1142208	1
Cluster 17	1442676	-1.268	Mycelium	Mucci_1442676	1
Cluster 18	1368227	-2.56633	Mycelium	Mucci_1368227	1
Cluster 19	1347049	-1.0464	Mycelium	Mucci_1347049	1
Cluster 20	1599415	-1.82685	Mycelium	Mucci_1599415	1
Cluster 21	1450080	0	Not_differential	Mucci_1450080	1
Cluster 22	1376907	-7.12426	Mycelium	Mucci_1376907	1
Cluster 23	1053451	0	Not_differential	Mucci_1053451	1
Cluster 24	1335846	-5.07327	Mycelium	Mucci_1335846	1
Cluster 25	1377156	-1.82502	Mycelium	Mucci_1377156	1
Cluster 26	1481772	-4.25828	Mycelium	Mucci_1481772	1
Cluster 28	1469045	0	Not_differential	Mucci_1469045	1
Cluster 29	1451144	-5.76135	Mycelium	Mucci_1451144	1
Cluster 31	1584864	2.1411	Yeast	Mucci_1584864	1
Cluster 32	1502130	0	Not_differential	Mucci_1502130	1
Cluster 33	1590178	1.78598	Yeast	Mucci_1590178	1
Cluster 34	1462743	-1.06046	Mycelium	Mucci_1462743	1
Cluster 35	1460552	0	Not_differential	Mucci_1460552	1
Cluster 37	1543933	1.2739	Yeast	Mucci_1543933	1
Cluster 38	1555938	1.12456	Yeast	Mucci_1555938	1
Cluster 39	1531745	3.3939	Yeast	Mucci_1531745	1
Cluster 40	1392229	0	Not_differential	Mucci_1392229	1
Cluster 41	1444640	1.00432	Yeast	Mucci_1444640	1
Cluster 42	1380992	-1.3147	Mycelium	Mucci_1380992	1
Cluster 43	1379248	-2.03441	Mycelium	Mucci_1379248	1
Cluster 44	1353576	-1.6407	Mycelium	Mucci_1353576	1
Cluster 45	1519445	0	Not_differential	Mucci_1519445	1
Cluster 46	1368424	0	Not_differential	Mucci_1368424	1
Cluster 47	1096060	-1.58387	Mycelium	Mucci_1096060	1
Cluster 49	1392103	0	Not_differential	Mucci_1392103	1
Cluster 50	1561729	0	Not_differential	Mucci_1561729	1
Cluster 51	1119585	-1.52386	Mycelium	Mucci_1119585	1
Cluster 52	1486894	0	Not_differential	Mucci_1486894	1
Cluster 53	1500721	2.33752	Yeast	Mucci_1500721	1
Cluster 54	1448552	-1.1938	Mycelium	Mucci_1448552	1
Cluster 56	1528637	-2.51991	Mycelium	Mucci_1528637	1
Cluster 57	1532295	3.01476	Yeast	Mucci_1532295	1
Cluster 58	1590547	-4.28252	Mycelium	Mucci_1590547	1
Cluster 61	1362497	-1.34492	Mycelium	Mucci_1362497	1
Cluster 62	1460729	1.36907	Yeast	Mucci_1460729	1
Cluster 63	1493955	-1.96162	Mycelium	Mucci_1493955	1
Cluster 64	1485152	0	Not_differential	Mucci_1485152	1
Cluster 66	1371485	-1.58661	Mycelium	Mucci_1371485	1
Cluster 67	1528453	0	Not_differential	Mucci_1528453	1
Cluster 68	1601209	1.78012	Yeast	Mucci_1601209	1
Cluster 69	1516083	-1.40143	Mycelium	Mucci_1516083	1
Cluster 70	1469947	2.1507	Yeast	Mucci_1469947	1
Cluster 71	1595950	-2.29091	Mycelium	Mucci_1595950	1
Cluster 72	1374227	0	Not_differential	Mucci_1374227	1
Cluster 73	1587041	-3.68846	Mycelium	Mucci_1587041	1
Cluster 74	1016976	1.43638	Yeast	Mucci_1016976	1
Cluster 75	1558476	0	Not_differential	Mucci_1558476	1
Cluster 76	1476625	-2.00151	Mycelium	Mucci_1476625	1
Cluster 77	1465870	-1.09798	Mycelium	Mucci_1465870	1
Cluster 78	1512846	-1.26818	Mycelium	Mucci_1512846	1
Cluster 79	1350200	-4.60342	Mycelium	Mucci_1350200	1
Cluster 81	1396163	-1.98701	Mycelium	Mucci_1396163	1
Cluster 82	1553236	-1.03261	Mycelium	Mucci_1553236	1
Cluster 86	1446621	-3.86466	Mycelium	Mucci_1446621	1
Cluster 87	1522177	1.71542	Yeast	Mucci_1522177	1
Cluster 88	1447121	-1.8659	Mycelium	Mucci_1447121	1
Cluster 89	1356905	1.40896	Yeast	Mucci_1356905	1
Cluster 90	1396125	0	Not_differential	Mucci_1396125	1
Cluster 91	1358675	0	Not_differential	Mucci_1358675	1
Cluster 93	1475255	-1.95893	Mycelium	Mucci_1475255	1
Cluster 95	1517067	-1.10637	Mycelium	Mucci_1517067	1
Cluster 97	1511958	-1.62592	Mycelium	Mucci_1511958	1
Cluster 99	1597166	0	Not_differential	Mucci_1597166	1
Cluster 101	1539157	-2.82287	Mycelium	Mucci_1539157	1
Cluster 102	1574245	0	Not_differential	Mucci_1574245	1
Cluster 103	1488904	0	Not_differential	Mucci_1488904	1
Cluster 104	1432833	1.57201	Yeast	Mucci_1432833	1
Cluster 105	1502569	0	Not_differential	Mucci_1502569	1
Cluster 106	1448945	-2.68977	Mycelium	Mucci_1448945	1
Cluster 108	1592134	-1.36829	Mycelium	Mucci_1592134	1
Cluster 110	1530387	-1.43378	Mycelium	Mucci_1530387	1
Cluster 111	1496215	4.38079	Yeast	Mucci_1496215	1
Cluster 112	1536432	-2.08916	Mycelium	Mucci_1536432	1
Cluster 113	1543227	1.39348	Yeast	Mucci_1543227	1
Cluster 114	1542322	2.28841	Yeast	Mucci_1542322	1
Cluster 115	1508043	0	Not_differential	Mucci_1508043	1
Cluster 116	1584744	-6.53598	Mycelium	Mucci_1584744	1
Cluster 117	1487407	1.41069	Yeast	Mucci_1487407	1
Cluster 118	1361103	2.06587	Yeast	Mucci_1361103	1
Cluster 119	1509382	-1.84622	Mycelium	Mucci_1509382	1
Cluster 120	1003500	-4.38376	Mycelium	Mucci_1003500	1
Cluster 121	1466685	0	Not_differential	Mucci_1466685	1
Cluster 122	1601510	0	Not_differential	Mucci_1601510	1
Cluster 124	1565872	0	Not_differential	Mucci_1565872	1
Cluster 125	1601611	0	Not_differential	Mucci_1601611	1
Cluster 126	1513372	1.85315	Yeast	Mucci_1513372	1
Cluster 128	1542627	0	Not_differential	Mucci_1542627	1
Cluster 129	1324426	-3.11499	Mycelium	Mucci_1324426	1
Cluster 130	1523568	-1.23319	Mycelium	Mucci_1523568	1
Cluster 132	1591016	0	Not_differential	Mucci_1591016	1
Cluster 133	1373133	-7.65677	Mycelium	Mucci_1373133	1
Cluster 135	1591862	0	Not_differential	Mucci_1591862	1
Cluster 136	1473065	-9.0781	Mycelium	Mucci_1473065	1
Cluster 137	1464015	-6.75247	Mycelium	Mucci_1464015	1
Cluster 139	1349510	0	Not_differential	Mucci_1349510	1
Cluster 141	1470833	1.81696	Yeast	Mucci_1470833	1
Cluster 142	1551163	0	Not_differential	Mucci_1551163	1
Cluster 143	1531204	-4.63723	Mycelium	Mucci_1531204	1
Cluster 144	1460184	0	Not_differential	Mucci_1460184	1
Cluster 145	1598287	-1.02016	Mycelium	Mucci_1598287	1
Cluster 146	1458951	0	Not_differential	Mucci_1458951	1
Cluster 147	1392991	-1.65483	Mycelium	Mucci_1392991	1
Cluster 148	1591901	-8.40084	Mycelium	Mucci_1591901	1
Cluster 149	1537139	0	Not_differential	Mucci_1537139	1
Cluster 151	1364211	0	Not_differential	Mucci_1364211	1
Cluster 152	1526201	-1.29293	Mycelium	Mucci_1526201	1
Cluster 154	1384257	-1.18116	Mycelium	Mucci_1384257	1
Cluster 156	1568192	1.87081	Yeast	Mucci_1568192	1
Cluster 157	1497484	1.32019	Yeast	Mucci_1497484	1
Cluster 158	1599970	1.03711	Yeast	Mucci_1599970	1
Cluster 159	1062673	0	Not_differential	Mucci_1062673	1
Cluster 160	1358140	-3.60183	Mycelium	Mucci_1358140	1
Cluster 162	1456899	0	Not_differential	Mucci_1456899	1
Cluster 163	1501470	0	Not_differential	Mucci_1501470	1
Cluster 164	1463849	2.21343	Yeast	Mucci_1463849	1
Cluster 165	1467026	-3.80587	Mycelium	Mucci_1467026	1
Cluster 166	1592588	0	Not_differential	Mucci_1592588	1
Cluster 167	1443898	0	Not_differential	Mucci_1443898	1
Cluster 168	1472535	0	Not_differential	Mucci_1472535	1
Cluster 170	1519231	2.53833	Yeast	Mucci_1519231	1
Cluster 171	1550851	2.78379	Yeast	Mucci_1550851	1
Cluster 175	1531102	-1.71214	Mycelium	Mucci_1531102	1
Cluster 176	1375186	1.21365	Yeast	Mucci_1375186	1
Cluster 177	1504008	0	Not_differential	Mucci_1504008	1
Cluster 178	1547420	0	Not_differential	Mucci_1547420	1
Cluster 179	1567206	0	Not_differential	Mucci_1567206	1
Cluster 180	1516978	1.41147	Yeast	Mucci_1516978	1
Cluster 182	1589261	0	Not_differential	Mucci_1589261	1
Cluster 183	1519360	-4.25818	Mycelium	Mucci_1519360	1
Cluster 184	1595034	-5.48745	Mycelium	Mucci_1595034	1
Cluster 187	1347933	0	Not_differential	Mucci_1347933	1
Cluster 188	1446249	-2.31908	Mycelium	Mucci_1446249	1
Cluster 189	1513834	-4.32262	Mycelium	Mucci_1513834	1
Cluster 190	1566660	1.02849	Yeast	Mucci_1566660	1
Cluster 191	1566725	-3.14786	Mycelium	Mucci_1566725	1
Cluster 192	1543620	-1.93407	Mycelium	Mucci_1543620	1
Cluster 194	1463895	1.71877	Yeast	Mucci_1463895	1
Cluster 195	1351079	-1.63261	Mycelium	Mucci_1351079	1
Cluster 196	1500572	0	Not_differential	Mucci_1500572	1
Cluster 197	1480324	0	Not_differential	Mucci_1480324	1
Cluster 198	1488753	-3.52721	Mycelium	Mucci_1488753	1
Cluster 199	1586581	0	Not_differential	Mucci_1586581	1
Cluster 202	1461411	0	Not_differential	Mucci_1461411	1
Cluster 205	1518590	2.31279	Yeast	Mucci_1518590	1
Cluster 206	1573112	0	Not_differential	Mucci_1573112	1
Cluster 207	1486323	1.72731	Yeast	Mucci_1486323	1
Cluster 208	1559304	0	Not_differential	Mucci_1559304	1
Cluster 209	1490714	2.25308	Yeast	Mucci_1490714	1
Cluster 210	1491632	0	Not_differential	Mucci_1491632	1
Cluster 212	1501215	3.19098	Yeast	Mucci_1501215	1
Cluster 213	1600907	-1.13679	Mycelium	Mucci_1600907	1
Cluster 214	1495086	0	Not_differential	Mucci_1495086	1
Cluster 215	1588946	-7.1761	Mycelium	Mucci_1588946	1
Cluster 216	1530563	0	Not_differential	Mucci_1530563	1
Cluster 217	1600894	1.09806	Yeast	Mucci_1600894	1
Cluster 218	1438082	-2.00279	Mycelium	Mucci_1438082	1
Cluster 219	1395629	-8.81098	Mycelium	Mucci_1395629	1
Cluster 220	1156345	-3.37795	Mycelium	Mucci_1156345	1
Cluster 223	1453482	1.97707	Yeast	Mucci_1453482	1
Cluster 224	1490916	-3.04239	Mycelium	Mucci_1490916	1
Cluster 225	1597848	0	Not_differential	Mucci_1597848	1
Cluster 227	1454930	-1.52569	Mycelium	Mucci_1454930	1
Cluster 228	1451201	-4.02525	Mycelium	Mucci_1451201	1
Cluster 229	1595018	-1.51641	Mycelium	Mucci_1595018	1
Cluster 230	1450446	0	Not_differential	Mucci_1450446	1
Cluster 231	1556613	0	Not_differential	Mucci_1556613	1
Cluster 232	1583122	0	Not_differential	Mucci_1583122	1
Cluster 233	1510080	2.94722	Yeast	Mucci_1510080	1
Cluster 236	1521445	0	Not_differential	Mucci_1521445	1
Cluster 237	1482808	0	Not_differential	Mucci_1482808	1
Cluster 238	1547832	-1.12819	Mycelium	Mucci_1547832	1
Cluster 239	1493407	-5.16789	Mycelium	Mucci_1493407	1
Cluster 240	1472834	1.17715	Yeast	Mucci_1472834	1
Cluster 241	1483902	1.71685	Yeast	Mucci_1483902	1
Cluster 243	1593501	-9.96787	Mycelium	Mucci_1593501	1
Cluster 244	1379354	2.22266	Yeast	Mucci_1379354	1
Cluster 246	1475228	-2.12835	Mycelium	Mucci_1475228	1
Cluster 247	1533963	0	Not_differential	Mucci_1533963	1
Cluster 248	1393863	0	Not_differential	Mucci_1393863	1
Cluster 249	1567025	-1.63452	Mycelium	Mucci_1567025	1
Cluster 250	1341134	1.2568	Yeast	Mucci_1341134	1
Cluster 251	1177367	0	Not_differential	Mucci_1177367	1
Cluster 252	1561253	-2.63125	Mycelium	Mucci_1561253	1
Cluster 253	1472681	-2.12944	Mycelium	Mucci_1472681	1
Cluster 254	1592856	0	Not_differential	Mucci_1592856	1
Cluster 256	1442683	3.48225	Yeast	Mucci_1442683	1
Cluster 257	1389865	-3.07732	Mycelium	Mucci_1389865	1
Cluster 258	1445333	1.81479	Yeast	Mucci_1445333	1
Cluster 259	1546798	0	Not_differential	Mucci_1546798	1
Cluster 260	1515675	1.3442	Yeast	Mucci_1515675	1
Cluster 261	1561469	-1.17362	Mycelium	Mucci_1561469	1
Cluster 262	1506587	-2.47854	Mycelium	Mucci_1506587	1
Cluster 264	1549569	3.55703	Yeast	Mucci_1549569	1
Cluster 265	1550122	-1.33636	Mycelium	Mucci_1550122	1
Cluster 266	1566968	-1.04982	Mycelium	Mucci_1566968	1
Cluster 267	1461043	0	Not_differential	Mucci_1461043	1
Cluster 268	1532090	0	Not_differential	Mucci_1532090	1
Cluster 269	1537013	0	Not_differential	Mucci_1537013	1
Cluster 272	1546377	-1.16451	Mycelium	Mucci_1546377	1
Cluster 273	1548815	-1.92749	Mycelium	Mucci_1548815	1
Cluster 274	1507170	-3.696	Mycelium	Mucci_1507170	1
Cluster 275	1490106	0	Not_differential	Mucci_1490106	1
Cluster 276	1600428	0	Not_differential	Mucci_1600428	1
Cluster 277	1411357	1.34844	Yeast	Mucci_1411357	1
Cluster 278	1512500	-2.88132	Mycelium	Mucci_1512500	1
Cluster 279	1487441	-1.79494	Mycelium	Mucci_1487441	1
Cluster 280	1506846	-1.55302	Mycelium	Mucci_1506846	1
Cluster 281	1481858	0	Not_differential	Mucci_1481858	1
Cluster 283	1527578	0	Not_differential	Mucci_1527578	1
Cluster 284	1548742	0	Not_differential	Mucci_1548742	1
Cluster 285	1362793	3.40404	Yeast	Mucci_1362793	1
Cluster 287	1474509	-1.31748	Mycelium	Mucci_1474509	1
Cluster 288	1591188	0	Not_differential	Mucci_1591188	1
Cluster 289	1522867	0	Not_differential	Mucci_1522867	1
Cluster 290	1581469	0	Not_differential	Mucci_1581469	1
Cluster 291	1321530	0	Not_differential	Mucci_1321530	1
Cluster 292	1357983	0	Not_differential	Mucci_1357983	1
Cluster 293	1508638	1.42991	Yeast	Mucci_1508638	1
Cluster 294	1561350	0	Not_differential	Mucci_1561350	1
Cluster 295	1548871	-1.15371	Mycelium	Mucci_1548871	1
Cluster 296	1519133	-1.7146	Mycelium	Mucci_1519133	1
Cluster 297	1537683	0	Not_differential	Mucci_1537683	1
Cluster 298	1356556	0	Not_differential	Mucci_1356556	1
Cluster 301	1351177	-1.45348	Mycelium	Mucci_1351177	1
Cluster 302	1383031	0	Not_differential	Mucci_1383031	1
Cluster 303	1532507	-2.11634	Mycelium	Mucci_1532507	1
Cluster 304	1378062	-1.15998	Mycelium	Mucci_1378062	1
Cluster 306	1466334	-5.12928	Mycelium	Mucci_1466334	1
Cluster 308	1351906	0	Not_differential	Mucci_1351906	1
Cluster 309	1478217	1.35369	Yeast	Mucci_1478217	1
Cluster 310	1528036	-6.44009	Mycelium	Mucci_1528036	1
Cluster 311	1340513	1.09724	Yeast	Mucci_1340513	1
Cluster 313	1588338	1.32057	Yeast	Mucci_1588338	1
Cluster 314	1473020	-1.41659	Mycelium	Mucci_1473020	1
Cluster 315	1516331	0	Not_differential	Mucci_1516331	1
Cluster 316	1523285	-1.48887	Mycelium	Mucci_1523285	1
Cluster 318	1497317	-6.63573	Mycelium	Mucci_1497317	1
Cluster 319	1379339	-1.24048	Mycelium	Mucci_1379339	1
Cluster 320	1446798	0	Not_differential	Mucci_1446798	1
Cluster 321	1465833	2.64279	Yeast	Mucci_1465833	1
Cluster 322	1543084	-1.96413	Mycelium	Mucci_1543084	1
Cluster 323	1593168	-1.93173	Mycelium	Mucci_1593168	1
Cluster 325	1598767	0	Not_differential	Mucci_1598767	1
Cluster 326	1540318	0	Not_differential	Mucci_1540318	1
Cluster 327	1563956	-1.78091	Mycelium	Mucci_1563956	1
Cluster 328	1537999	-3.35113	Mycelium	Mucci_1537999	1
Cluster 329	1541805	-3.462	Mycelium	Mucci_1541805	1
Cluster 330	1567159	1.83159	Yeast	Mucci_1567159	1
Cluster 331	1392593	-5.27383	Mycelium	Mucci_1392593	1
Cluster 332	1470821	0	Not_differential	Mucci_1470821	1
Cluster 334	1457367	1.16469	Yeast	Mucci_1457367	1
Cluster 335	1578525	0	Not_differential	Mucci_1578525	1
Cluster 336	1585975	-3.93239	Mycelium	Mucci_1585975	1
Cluster 337	1504529	0	Not_differential	Mucci_1504529	1
Cluster 338	1447312	-2.20734	Mycelium	Mucci_1447312	1
Cluster 339	1458093	1.06142	Yeast	Mucci_1458093	1
Cluster 340	1507402	0	Not_differential	Mucci_1507402	1
Cluster 342	1347700	-4.8654	Mycelium	Mucci_1347700	1
Cluster 344	1490477	-2.21683	Mycelium	Mucci_1490477	1
Cluster 345	1548642	0	Not_differential	Mucci_1548642	1
Cluster 346	1552696	0	Not_differential	Mucci_1552696	1
Cluster 349	1378586	-6.76711	Mycelium	Mucci_1378586	1
Cluster 350	1514936	0	Not_differential	Mucci_1514936	1
Cluster 351	1536152	0	Not_differential	Mucci_1536152	1
Cluster 352	1348871	-8.9984	Mycelium	Mucci_1348871	1
Cluster 353	1454577	0	Not_differential	Mucci_1454577	1
Cluster 354	1459140	-1.25877	Mycelium	Mucci_1459140	1
Cluster 356	1594130	-4.98178	Mycelium	Mucci_1594130	1
Cluster 357	1466422	-1.29894	Mycelium	Mucci_1466422	1
Cluster 358	1497344	-5.06911	Mycelium	Mucci_1497344	1
Cluster 359	1460415	-1.68313	Mycelium	Mucci_1460415	1
Cluster 361	1529426	2.4221	Yeast	Mucci_1529426	1
Cluster 362	1545542	-1.41924	Mycelium	Mucci_1545542	1
Cluster 363	1453553	1.01737	Yeast	Mucci_1453553	1
Cluster 364	1458474	0	Not_differential	Mucci_1458474	1
Cluster 365	1358409	1.88109	Yeast	Mucci_1358409	1
Cluster 366	1051461	1.06178	Yeast	Mucci_1051461	1
Cluster 367	1148437	0	Not_differential	Mucci_1148437	1
Cluster 370	1549038	0	Not_differential	Mucci_1549038	1
Cluster 371	1564111	-1.03793	Mycelium	Mucci_1564111	1
Cluster 372	1566709	-1.53616	Mycelium	Mucci_1566709	1
Cluster 373	1506854	-2.39937	Mycelium	Mucci_1506854	1
Cluster 374	1516043	-1.62661	Mycelium	Mucci_1516043	1
Cluster 375	1546350	0	Not_differential	Mucci_1546350	1
Cluster 376	1351855	2.21051	Yeast	Mucci_1351855	1
Cluster 377	1483665	-2.3456	Mycelium	Mucci_1483665	1
Cluster 378	1379894	0	Not_differential	Mucci_1379894	1
Cluster 379	1355139	-8.93556	Mycelium	Mucci_1355139	1
Cluster 380	1479587	0	Not_differential	Mucci_1479587	1
Cluster 381	1537158	-3.42822	Mycelium	Mucci_1537158	1
Cluster 384	1388255	-1.48423	Mycelium	Mucci_1388255	1
Cluster 385	1533854	0	Not_differential	Mucci_1533854	1
Cluster 386	1536057	1.19409	Yeast	Mucci_1536057	1
Cluster 387	1542670	0	Not_differential	Mucci_1542670	1
Cluster 389	1557085	-3.69938	Mycelium	Mucci_1557085	1
Cluster 390	1498909	-3.18245	Mycelium	Mucci_1498909	1
Cluster 391	1528597	-1.35848	Mycelium	Mucci_1528597	1
Cluster 392	1376994	3.86548	Yeast	Mucci_1376994	1
Cluster 393	1504326	-1.5898	Mycelium	Mucci_1504326	1
Cluster 394	1478913	-3.97423	Mycelium	Mucci_1478913	1
Cluster 395	1487062	0	Not_differential	Mucci_1487062	1
Cluster 397	1452990	0	Not_differential	Mucci_1452990	1
Cluster 398	1497276	2.86209	Yeast	Mucci_1497276	1
Cluster 399	1596883	-1.78233	Mycelium	Mucci_1596883	1
Cluster 400	1379057	0	Not_differential	Mucci_1379057	1
Cluster 401	1465721	-3.59124	Mycelium	Mucci_1465721	1
Cluster 402	1451960	-1.07835	Mycelium	Mucci_1451960	1
Cluster 403	1447814	1.19302	Yeast	Mucci_1447814	1
Cluster 404	1487100	3.12263	Yeast	Mucci_1487100	1
Cluster 406	1459213	0	Not_differential	Mucci_1459213	1
Cluster 408	1387547	-1.41623	Mycelium	Mucci_1387547	1
Cluster 409	1471126	0	Not_differential	Mucci_1471126	1
Cluster 410	1542013	-1.12811	Mycelium	Mucci_1542013	1
Cluster 412	1467657	-4.21188	Mycelium	Mucci_1467657	1
Cluster 414	1395592	0	Not_differential	Mucci_1395592	1
Cluster 415	1466356	-1.35666	Mycelium	Mucci_1466356	1
Cluster 417	1495163	0	Not_differential	Mucci_1495163	1
Cluster 418	1476364	0	Not_differential	Mucci_1476364	1
Cluster 420	1483579	-1.42562	Mycelium	Mucci_1483579	1
Cluster 421	1465980	2.01934	Yeast	Mucci_1465980	1
Cluster 422	1461798	2.38042	Yeast	Mucci_1461798	1
Cluster 424	1577919	-4.54648	Mycelium	Mucci_1577919	1
Cluster 426	1568349	1.23804	Yeast	Mucci_1568349	1
Cluster 427	1484590	-3.17643	Mycelium	Mucci_1484590	1
Cluster 428	1544069	-1.32437	Mycelium	Mucci_1544069	1
Cluster 429	1461648	1.4712	Yeast	Mucci_1461648	1
Cluster 430	1395733	-1.99026	Mycelium	Mucci_1395733	1
Cluster 431	1478111	-2.39807	Mycelium	Mucci_1478111	1
Cluster 433	1452803	-2.13081	Mycelium	Mucci_1452803	1
Cluster 434	1484818	4.01041	Yeast	Mucci_1484818	1
Cluster 436	1354331	-1.07729	Mycelium	Mucci_1354331	1
Cluster 438	1363444	0	Not_differential	Mucci_1363444	1
Cluster 439	1455582	-5.5116	Mycelium	Mucci_1455582	1
Cluster 440	1478001	0	Not_differential	Mucci_1478001	1
Cluster 441	1442516	0	Not_differential	Mucci_1442516	1
Cluster 442	1493031	-1.34565	Mycelium	Mucci_1493031	1
Cluster 443	1582730	0	Not_differential	Mucci_1582730	1
Cluster 446	1462097	0	Not_differential	Mucci_1462097	1
Cluster 447	1469504	0	Not_differential	Mucci_1469504	1
Cluster 449	1478305	-1.0646	Mycelium	Mucci_1478305	1
Cluster 450	1495875	0	Not_differential	Mucci_1495875	1
Cluster 451	1349753	0	Not_differential	Mucci_1349753	1
Cluster 452	1511196	-3.43784	Mycelium	Mucci_1511196	1
Cluster 454	1379347	-7.0292	Mycelium	Mucci_1379347	1
Cluster 456	1466945	-2.63747	Mycelium	Mucci_1466945	1
Cluster 457	1457505	2.23779	Yeast	Mucci_1457505	1
Cluster 458	1483268	-7.09219	Mycelium	Mucci_1483268	1
Cluster 460	1355282	0	Not_differential	Mucci_1355282	1
Cluster 461	1472229	-1.37846	Mycelium	Mucci_1472229	1
Cluster 462	1553685	1.40792	Yeast	Mucci_1553685	1
Cluster 463	1087891	1.75154	Yeast	Mucci_1087891	1
Cluster 464	1365292	-6.54788	Mycelium	Mucci_1365292	1
Cluster 465	1377842	-1.86779	Mycelium	Mucci_1377842	1
Cluster 466	1484614	0	Not_differential	Mucci_1484614	1
Cluster 467	1467188	-1.84675	Mycelium	Mucci_1467188	1
Cluster 468	1521837	1.48358	Yeast	Mucci_1521837	1
Cluster 469	1525012	-4.01293	Mycelium	Mucci_1525012	1
Cluster 470	1566381	1.26421	Yeast	Mucci_1566381	1
Cluster 471	1485399	-3.31835	Mycelium	Mucci_1485399	1
Cluster 472	1553845	2.9973	Yeast	Mucci_1553845	1
Cluster 473	1349844	1.14673	Yeast	Mucci_1349844	1
Cluster 475	1506186	0	Not_differential	Mucci_1506186	1
Cluster 476	1524693	1.56744	Yeast	Mucci_1524693	1
Cluster 477	1046273	-1.21715	Mycelium	Mucci_1046273	1
Cluster 478	1584836	0	Not_differential	Mucci_1584836	1
Cluster 480	1499551	-3.96004	Mycelium	Mucci_1499551	1
Cluster 481	1507010	1.69283	Yeast	Mucci_1507010	1
Cluster 482	1510693	-4.4165	Mycelium	Mucci_1510693	1
Cluster 483	1523480	1.16227	Yeast	Mucci_1523480	1
Cluster 484	1464184	0	Not_differential	Mucci_1464184	1
Cluster 485	1513579	1.65973	Yeast	Mucci_1513579	1
Cluster 486	1537872	0	Not_differential	Mucci_1537872	1
Cluster 490	1585292	1.13937	Yeast	Mucci_1585292	1
Cluster 491	1465157	-2.14524	Mycelium	Mucci_1465157	1
Cluster 493	1533482	1.29656	Yeast	Mucci_1533482	1
Cluster 494	1549404	0	Not_differential	Mucci_1549404	1
Cluster 496	1452154	0	Not_differential	Mucci_1452154	1
Cluster 497	1504188	4.12561	Yeast	Mucci_1504188	1
Cluster 499	1412843	0	Not_differential	Mucci_1412843	1
Cluster 500	1473608	0	Not_differential	Mucci_1473608	1
Cluster 502	1472060	-4.57706	Mycelium	Mucci_1472060	1
Cluster 503	1479225	0	Not_differential	Mucci_1479225	1
Cluster 505	1497372	3.45006	Yeast	Mucci_1497372	1
Cluster 507	1478086	-2.92064	Mycelium	Mucci_1478086	1
Cluster 508	1466653	0	Not_differential	Mucci_1466653	1
Cluster 510	1351096	0	Not_differential	Mucci_1351096	1
Cluster 511	1355782	-1.24027	Mycelium	Mucci_1355782	1
Cluster 513	1512434	0	Not_differential	Mucci_1512434	1
Cluster 514	1543351	-2.01232	Mycelium	Mucci_1543351	1
Cluster 515	1542190	0	Not_differential	Mucci_1542190	1
Cluster 518	1547165	0	Not_differential	Mucci_1547165	1
Cluster 519	1522510	1.38844	Yeast	Mucci_1522510	1
Cluster 520	1589603	0	Not_differential	Mucci_1589603	1
Cluster 521	1463710	-6.01698	Mycelium	Mucci_1463710	1
Cluster 522	1159212	4.41129	Yeast	Mucci_1159212	1
Cluster 523	1472698	-2.65596	Mycelium	Mucci_1472698	1
Cluster 524	1601442	1.52856	Yeast	Mucci_1601442	1
Cluster 525	1508444	-4.52039	Mycelium	Mucci_1508444	1
Cluster 528	1507471	-5.2652	Mycelium	Mucci_1507471	1
Cluster 530	1557673	-3.51788	Mycelium	Mucci_1557673	1
Cluster 532	1548388	0	Not_differential	Mucci_1548388	1
Cluster 533	1595550	-1.80342	Mycelium	Mucci_1595550	1
Cluster 534	1333547	0	Not_differential	Mucci_1333547	1
Cluster 535	1479178	-2.19691	Mycelium	Mucci_1479178	1
Cluster 536	1495853	-4.53671	Mycelium	Mucci_1495853	1
Cluster 537	1501740	-1.29025	Mycelium	Mucci_1501740	1
Cluster 538	1508562	-4.19253	Mycelium	Mucci_1508562	1
Cluster 540	1532810	2.19134	Yeast	Mucci_1532810	1
Cluster 543	1380165	0	Not_differential	Mucci_1380165	1
Cluster 544	1466916	-1.0239	Mycelium	Mucci_1466916	1
Cluster 545	1562578	0	Not_differential	Mucci_1562578	1
Cluster 546	1479548	-2.39136	Mycelium	Mucci_1479548	1
Cluster 547	1540131	0	Not_differential	Mucci_1540131	1
Cluster 548	1453734	1.8674	Yeast	Mucci_1453734	1
Cluster 549	1453744	-2.48889	Mycelium	Mucci_1453744	1
Cluster 550	1513298	2.98116	Yeast	Mucci_1513298	1
Cluster 551	1447387	-6.25257	Mycelium	Mucci_1447387	1
Cluster 552	1385460	-1.22383	Mycelium	Mucci_1385460	1
Cluster 553	1457129	-5.90895	Mycelium	Mucci_1457129	1
Cluster 554	1557374	0	Not_differential	Mucci_1557374	1
Cluster 557	1455037	0	Not_differential	Mucci_1455037	1
Cluster 558	1529614	-3.80105	Mycelium	Mucci_1529614	1
Cluster 559	1526037	2.2117	Yeast	Mucci_1526037	1
Cluster 560	1480992	-4.52707	Mycelium	Mucci_1480992	1
Cluster 561	1546248	-1.4974	Mycelium	Mucci_1546248	1
Cluster 562	1553547	0	Not_differential	Mucci_1553547	1
Cluster 563	1555046	0	Not_differential	Mucci_1555046	1
Cluster 564	1443688	0	Not_differential	Mucci_1443688	1
Cluster 565	1508237	-1.9748	Mycelium	Mucci_1508237	1
Cluster 567	1575802	3.04766	Yeast	Mucci_1575802	1
Cluster 568	1353195	-8.73758	Mycelium	Mucci_1353195	1
Cluster 570	1363300	-2.99982	Mycelium	Mucci_1363300	1
Cluster 571	1346345	-1.68926	Mycelium	Mucci_1346345	1
Cluster 573	1443494	1.60435	Yeast	Mucci_1443494	1
Cluster 574	1538622	0	Not_differential	Mucci_1538622	1
Cluster 576	1500100	0	Not_differential	Mucci_1500100	1
Cluster 577	1371182	0	Not_differential	Mucci_1371182	1
Cluster 578	1482556	-3.0319	Mycelium	Mucci_1482556	1
Cluster 579	1557137	0	Not_differential	Mucci_1557137	1
Cluster 580	1546568	0	Not_differential	Mucci_1546568	1
Cluster 581	1593703	0	Not_differential	Mucci_1593703	1
Cluster 582	1456382	-2.5596	Mycelium	Mucci_1456382	1
Cluster 584	1481527	0	Not_differential	Mucci_1481527	1
Cluster 585	1487212	0	Not_differential	Mucci_1487212	1
Cluster 586	1413078	0	Not_differential	Mucci_1413078	1
Cluster 587	1444783	0	Not_differential	Mucci_1444783	1
Cluster 588	1496578	0	Not_differential	Mucci_1496578	1
Cluster 589	1547410	0	Not_differential	Mucci_1547410	1
Cluster 590	1533687	-2.3191	Mycelium	Mucci_1533687	1
Cluster 592	1391043	-2.95563	Mycelium	Mucci_1391043	1
Cluster 593	1455688	0	Not_differential	Mucci_1455688	1
Cluster 594	1475589	0	Not_differential	Mucci_1475589	1
Cluster 595	1533721	-3.00996	Mycelium	Mucci_1533721	1
Cluster 596	1506118	-1.45078	Mycelium	Mucci_1506118	1
Cluster 599	1491552	0	Not_differential	Mucci_1491552	1
Cluster 600	1474373	1.03896	Yeast	Mucci_1474373	1
Cluster 602	1520228	-2.15607	Mycelium	Mucci_1520228	1
Cluster 603	1598381	-1.10836	Mycelium	Mucci_1598381	1
Cluster 605	1540295	0	Not_differential	Mucci_1540295	1
Cluster 606	1369872	-3.70808	Mycelium	Mucci_1369872	1
Cluster 608	1037881	0	Not_differential	Mucci_1037881	1
Cluster 609	1487538	-2.15051	Mycelium	Mucci_1487538	1
Cluster 610	1502177	0	Not_differential	Mucci_1502177	1
Cluster 612	1535490	2.05346	Yeast	Mucci_1535490	1
Cluster 613	1585126	-1.75142	Mycelium	Mucci_1585126	1
Cluster 614	1548623	-1.01788	Mycelium	Mucci_1548623	1
Cluster 616	1352963	-2.55676	Mycelium	Mucci_1352963	1
Cluster 617	1480806	0	Not_differential	Mucci_1480806	1
Cluster 618	1511991	0	Not_differential	Mucci_1511991	1
Cluster 619	1568089	-4.0389	Mycelium	Mucci_1568089	1
Cluster 622	1456371	1.2888	Yeast	Mucci_1456371	1
Cluster 624	1511905	-7.14883	Mycelium	Mucci_1511905	1
Cluster 626	1379098	2.2852	Yeast	Mucci_1379098	1
Cluster 627	1521524	-1.5412	Mycelium	Mucci_1521524	1
Cluster 630	1562884	-5.28404	Mycelium	Mucci_1562884	1
Cluster 632	1598777	-4.62635	Mycelium	Mucci_1598777	1
Cluster 633	1476152	-4.23384	Mycelium	Mucci_1476152	1
Cluster 634	1521391	0	Not_differential	Mucci_1521391	1
Cluster 635	1141391	-3.57221	Mycelium	Mucci_1141391	1
Cluster 638	1390197	-1.39896	Mycelium	Mucci_1390197	1
Cluster 639	1497461	1.33485	Yeast	Mucci_1497461	1
Cluster 640	1540112	0	Not_differential	Mucci_1540112	1
Cluster 643	1536673	0	Not_differential	Mucci_1536673	1
Cluster 645	1465948	-1.41968	Mycelium	Mucci_1465948	1
Cluster 646	1528714	-2.10152	Mycelium	Mucci_1528714	1
Cluster 647	1593611	0	Not_differential	Mucci_1593611	1
Cluster 649	1335983	1.73159	Yeast	Mucci_1335983	1
Cluster 650	1442266	1.14723	Yeast	Mucci_1442266	1
Cluster 651	1507792	4.32984	Yeast	Mucci_1507792	1
Cluster 652	1335150	-1.44577	Mycelium	Mucci_1335150	1
Cluster 653	1445510	2.15853	Yeast	Mucci_1445510	1
Cluster 654	1463199	-1.36955	Mycelium	Mucci_1463199	1
Cluster 655	1533665	1.50341	Yeast	Mucci_1533665	1
Cluster 656	1597086	2.77064	Yeast	Mucci_1597086	1
Cluster 658	1378841	-1.87522	Mycelium	Mucci_1378841	1
Cluster 660	1534220	-6.56306	Mycelium	Mucci_1534220	1
Cluster 661	1487205	0	Not_differential	Mucci_1487205	1
Cluster 662	1524906	1.13092	Yeast	Mucci_1524906	1
Cluster 664	1601554	-6.7171	Mycelium	Mucci_1601554	1
Cluster 666	1540880	1.47322	Yeast	Mucci_1540880	1
Cluster 667	1393798	1.79177	Yeast	Mucci_1393798	1
Cluster 668	1460598	0	Not_differential	Mucci_1460598	1
Cluster 670	1554650	0	Not_differential	Mucci_1554650	1
Cluster 671	1456718	-1.75861	Mycelium	Mucci_1456718	1
Cluster 672	1473228	-4.42554	Mycelium	Mucci_1473228	1
Cluster 673	1476510	-3.26137	Mycelium	Mucci_1476510	1
Cluster 675	1365517	1.22596	Yeast	Mucci_1365517	1
Cluster 676	1487296	-4.99618	Mycelium	Mucci_1487296	1
Cluster 677	1561834	0	Not_differential	Mucci_1561834	1
Cluster 678	1503848	-2.85701	Mycelium	Mucci_1503848	1
Cluster 679	1377288	-1.21626	Mycelium	Mucci_1377288	1
Cluster 680	1463211	1.55919	Yeast	Mucci_1463211	1
Cluster 683	1501186	1.45969	Yeast	Mucci_1501186	1
Cluster 685	1472174	0	Not_differential	Mucci_1472174	1
Cluster 686	1486398	-2.36598	Mycelium	Mucci_1486398	1
Cluster 688	1599201	-1.49276	Mycelium	Mucci_1599201	1
Cluster 689	1359571	4.12372	Yeast	Mucci_1359571	1
Cluster 690	1547368	0	Not_differential	Mucci_1547368	1
Cluster 691	1526373	-1.72729	Mycelium	Mucci_1526373	1
Cluster 693	1464978	0	Not_differential	Mucci_1464978	1
Cluster 694	1545529	-1.21354	Mycelium	Mucci_1545529	1
Cluster 699	1454083	1.43827	Yeast	Mucci_1454083	1
Cluster 700	1541364	1.55946	Yeast	Mucci_1541364	1
Cluster 701	1544678	-2.20913	Mycelium	Mucci_1544678	1
Cluster 702	1501425	0	Not_differential	Mucci_1501425	1
Cluster 704	1553073	4.08746	Yeast	Mucci_1553073	1
Cluster 705	1594440	-1.89445	Mycelium	Mucci_1594440	1
Cluster 706	1601319	-2.56068	Mycelium	Mucci_1601319	1
Cluster 707	1380177	-1.48113	Mycelium	Mucci_1380177	1
Cluster 708	1505659	1.1525	Yeast	Mucci_1505659	1
Cluster 709	1507703	-3.69829	Mycelium	Mucci_1507703	1
Cluster 710	1548735	-4.18725	Mycelium	Mucci_1548735	1
Cluster 712	1578203	-9.68217	Mycelium	Mucci_1578203	1
Cluster 714	1477233	-1.00899	Mycelium	Mucci_1477233	1
Cluster 715	1534247	1.25818	Yeast	Mucci_1534247	1
Cluster 716	1486576	-1.15311	Mycelium	Mucci_1486576	1
Cluster 717	1601518	-7.14003	Mycelium	Mucci_1601518	1
Cluster 718	1495303	-1.68767	Mycelium	Mucci_1495303	1
Cluster 719	1599361	0	Not_differential	Mucci_1599361	1
Cluster 720	1365502	-8.58319	Mycelium	Mucci_1365502	1
Cluster 721	1514318	-1.18329	Mycelium	Mucci_1514318	1
Cluster 722	1547815	-1.10026	Mycelium	Mucci_1547815	1
Cluster 723	1460357	1.63579	Yeast	Mucci_1460357	1
Cluster 725	1463493	-2.39528	Mycelium	Mucci_1463493	1
Cluster 726	1480544	-1.06167	Mycelium	Mucci_1480544	1
Cluster 727	1523513	0	Not_differential	Mucci_1523513	1
Cluster 729	1592234	1.26139	Yeast	Mucci_1592234	1
Cluster 730	1490934	-1.12951	Mycelium	Mucci_1490934	1
Cluster 732	1483982	1.30455	Yeast	Mucci_1483982	1
Cluster 733	1430811	-4.29059	Mycelium	Mucci_1430811	1
Cluster 734	1548471	-4.28629	Mycelium	Mucci_1548471	1
Cluster 735	1498381	-3.29781	Mycelium	Mucci_1498381	1
Cluster 736	1501272	1.35583	Yeast	Mucci_1501272	1
Cluster 738	1355971	2.82004	Yeast	Mucci_1355971	1
Cluster 739	1459924	0	Not_differential	Mucci_1459924	1
Cluster 740	1368492	-3.37341	Mycelium	Mucci_1368492	1
Cluster 741	1463941	-1.42285	Mycelium	Mucci_1463941	1
Cluster 742	1464744	2.20167	Yeast	Mucci_1464744	1
Cluster 743	1499609	1.44477	Yeast	Mucci_1499609	1
Cluster 744	1506581	0	Not_differential	Mucci_1506581	1
Cluster 745	1601348	1.28806	Yeast	Mucci_1601348	1
Cluster 746	1518188	0	Not_differential	Mucci_1518188	1
Cluster 747	1592481	-1.14046	Mycelium	Mucci_1592481	1
Cluster 748	1058846	-5.00848	Mycelium	Mucci_1058846	1
Cluster 751	1595512	-2.65135	Mycelium	Mucci_1595512	1
Cluster 754	1467350	-4.37346	Mycelium	Mucci_1467350	1
Cluster 755	1503343	2.57834	Yeast	Mucci_1503343	1
Cluster 756	1503540	1.21509	Yeast	Mucci_1503540	1
Cluster 758	1545391	0	Not_differential	Mucci_1545391	1
Cluster 760	1530932	1.28949	Yeast	Mucci_1530932	1
Cluster 761	1444228	-1.03577	Mycelium	Mucci_1444228	1
Cluster 762	1595084	-1.6645	Mycelium	Mucci_1595084	1
Cluster 763	1470240	-7.70783	Mycelium	Mucci_1470240	1
Cluster 764	1169398	-1.699	Mycelium	Mucci_1169398	1
Cluster 765	1487738	2.1072	Yeast	Mucci_1487738	1
Cluster 766	1544849	1.80112	Yeast	Mucci_1544849	1
Cluster 767	1571742	0	Not_differential	Mucci_1571742	1
Cluster 769	1511344	-4.51041	Mycelium	Mucci_1511344	1
Cluster 771	1380085	-1.4922	Mycelium	Mucci_1380085	1
Cluster 772	1455020	0	Not_differential	Mucci_1455020	1
Cluster 773	1529177	-2.41979	Mycelium	Mucci_1529177	1
Cluster 774	1454269	0	Not_differential	Mucci_1454269	1
Cluster 775	1378127	-1.21391	Mycelium	Mucci_1378127	1
Cluster 777	1518142	3.05561	Yeast	Mucci_1518142	1
Cluster 779	1553319	-1.60795	Mycelium	Mucci_1553319	1
Cluster 780	1079591	-1.59487	Mycelium	Mucci_1079591	1
Cluster 781	1526810	0	Not_differential	Mucci_1526810	1
Cluster 782	1593475	2.69145	Yeast	Mucci_1593475	1
Cluster 783	1471988	-2.11723	Mycelium	Mucci_1471988	1
Cluster 784	1563925	2.27009	Yeast	Mucci_1563925	1
Cluster 785	1374601	-1.98668	Mycelium	Mucci_1374601	1
Cluster 787	1493826	2.18767	Yeast	Mucci_1493826	1
Cluster 788	1495914	0	Not_differential	Mucci_1495914	1
Cluster 789	1511378	-1.19467	Mycelium	Mucci_1511378	1
Cluster 790	1522527	0	Not_differential	Mucci_1522527	1
Cluster 791	1600638	-1.15562	Mycelium	Mucci_1600638	1
Cluster 792	1379509	2.52741	Yeast	Mucci_1379509	1
Cluster 793	1500804	6.60047	Yeast	Mucci_1500804	1
Cluster 794	1514484	-6.96686	Mycelium	Mucci_1514484	1
Cluster 795	1520856	0	Not_differential	Mucci_1520856	1
Cluster 796	1386627	1.97505	Yeast	Mucci_1386627	1
Cluster 797	1468639	1.25645	Yeast	Mucci_1468639	1
Cluster 798	1537705	-2.36922	Mycelium	Mucci_1537705	1
Cluster 799	1592237	0	Not_differential	Mucci_1592237	1
Cluster 801	1599530	3.18202	Yeast	Mucci_1599530	1
Cluster 802	1172080	1.9742	Yeast	Mucci_1172080	1
Cluster 803	1557758	0	Not_differential	Mucci_1557758	1
Cluster 804	1553884	1.43815	Yeast	Mucci_1553884	1
Cluster 805	1473536	0	Not_differential	Mucci_1473536	1
Cluster 806	1473992	-3.57711	Mycelium	Mucci_1473992	1
Cluster 808	1478958	2.18194	Yeast	Mucci_1478958	1
Cluster 809	1381209	0	Not_differential	Mucci_1381209	1
Cluster 810	1598065	1.45992	Yeast	Mucci_1598065	1
Cluster 811	1514465	-7.52126	Mycelium	Mucci_1514465	1
Cluster 813	1485282	-2.48599	Mycelium	Mucci_1485282	1
Cluster 814	1452288	1.90375	Yeast	Mucci_1452288	1
Cluster 815	1496550	0	Not_differential	Mucci_1496550	1
Cluster 817	1518536	-5.73219	Mycelium	Mucci_1518536	1
Cluster 818	1551690	9.58999	Yeast	Mucci_1551690	1
Cluster 819	1594929	-2.30733	Mycelium	Mucci_1594929	1
Cluster 820	1581495	5.22797	Yeast	Mucci_1581495	1
Cluster 821	1454973	0	Not_differential	Mucci_1454973	1
Cluster 822	1481660	0	Not_differential	Mucci_1481660	1
Cluster 824	1326529	-2.95306	Mycelium	Mucci_1326529	1
Cluster 825	1459350	2.39669	Yeast	Mucci_1459350	1
Cluster 827	1494336	-7.17224	Mycelium	Mucci_1494336	1
Cluster 829	1484820	-2.48137	Mycelium	Mucci_1484820	1
Cluster 830	1500298	-1.45385	Mycelium	Mucci_1500298	1
Cluster 831	1514830	1.3721	Yeast	Mucci_1514830	1
Cluster 832	1515595	0	Not_differential	Mucci_1515595	1
Cluster 833	1535903	0	Not_differential	Mucci_1535903	1
Cluster 834	1386197	-1.62695	Mycelium	Mucci_1386197	1
Cluster 835	1462087	0	Not_differential	Mucci_1462087	1
Cluster 836	1514283	-4.36492	Mycelium	Mucci_1514283	1
Cluster 837	1333678	-4.31792	Mycelium	Mucci_1333678	1
Cluster 839	1561202	0	Not_differential	Mucci_1561202	1
Cluster 840	1563170	0	Not_differential	Mucci_1563170	1
Cluster 841	1481178	1.17417	Yeast	Mucci_1481178	1
Cluster 842	1555442	1.30515	Yeast	Mucci_1555442	1
Cluster 843	1568654	0	Not_differential	Mucci_1568654	1
Cluster 844	1504178	-1.82887	Mycelium	Mucci_1504178	1
Cluster 845	1505034	1.38432	Yeast	Mucci_1505034	1
Cluster 846	1177383	0	Not_differential	Mucci_1177383	1
Cluster 847	1360444	-6.0102	Mycelium	Mucci_1360444	1
Cluster 849	1392411	0	Not_differential	Mucci_1392411	1
Cluster 850	1481016	-1.99188	Mycelium	Mucci_1481016	1
Cluster 851	1546156	0	Not_differential	Mucci_1546156	1
Cluster 852	1559426	0	Not_differential	Mucci_1559426	1
Cluster 853	1596547	-2.72388	Mycelium	Mucci_1596547	1
Cluster 855	1482579	-5.22097	Mycelium	Mucci_1482579	1
Cluster 856	1514503	-1.267	Mycelium	Mucci_1514503	1
Cluster 857	1528925	3.04745	Yeast	Mucci_1528925	1
Cluster 858	1495656	0	Not_differential	Mucci_1495656	1
Cluster 859	1497153	2.25657	Yeast	Mucci_1497153	1
Cluster 860	1453334	0	Not_differential	Mucci_1453334	1
Cluster 861	1563613	0	Not_differential	Mucci_1563613	1
Cluster 862	1372056	3.04343	Yeast	Mucci_1372056	1
Cluster 863	1552372	-2.75783	Mycelium	Mucci_1552372	1
Cluster 864	1553819	0	Not_differential	Mucci_1553819	1
Cluster 865	1592347	1.61541	Yeast	Mucci_1592347	1
Cluster 866	1459735	0	Not_differential	Mucci_1459735	1
Cluster 869	1532715	0	Not_differential	Mucci_1532715	1
Cluster 870	1369070	0	Not_differential	Mucci_1369070	1
Cluster 871	1503662	-7.50924	Mycelium	Mucci_1503662	1
Cluster 872	1528319	-5.73215	Mycelium	Mucci_1528319	1
Cluster 873	1346385	0	Not_differential	Mucci_1346385	1
Cluster 874	1370489	0	Not_differential	Mucci_1370489	1
Cluster 875	1519518	1.68448	Yeast	Mucci_1519518	1
Cluster 876	1383197	0	Not_differential	Mucci_1383197	1
Cluster 877	1508020	-8.13106	Mycelium	Mucci_1508020	1
Cluster 878	1600558	0	Not_differential	Mucci_1600558	1
Cluster 879	1355468	0	Not_differential	Mucci_1355468	1
Cluster 880	1372059	-1.83807	Mycelium	Mucci_1372059	1
Cluster 881	1379837	-3.83906	Mycelium	Mucci_1379837	1
Cluster 885	1593117	-1.18661	Mycelium	Mucci_1593117	1
Cluster 887	1445162	1.06225	Yeast	Mucci_1445162	1
Cluster 888	1496083	0	Not_differential	Mucci_1496083	1
Cluster 889	1518441	0	Not_differential	Mucci_1518441	1
Cluster 890	1371135	2.22367	Yeast	Mucci_1371135	1
Cluster 891	1494530	-2.72691	Mycelium	Mucci_1494530	1
Cluster 893	1554216	-1.17635	Mycelium	Mucci_1554216	1
Cluster 894	1455821	2.15602	Yeast	Mucci_1455821	1
Cluster 895	1461290	2.73322	Yeast	Mucci_1461290	1
Cluster 896	1542139	-5.03804	Mycelium	Mucci_1542139	1
Cluster 897	1480706	-1.98409	Mycelium	Mucci_1480706	1
Cluster 898	1539833	1.55524	Yeast	Mucci_1539833	1
Cluster 901	1507127	-4.96365	Mycelium	Mucci_1507127	1
Cluster 902	1523817	-1.96723	Mycelium	Mucci_1523817	1
Cluster 903	1457179	-3.6318	Mycelium	Mucci_1457179	1
Cluster 904	1463394	-1.20099	Mycelium	Mucci_1463394	1
Cluster 905	1487663	-1.32784	Mycelium	Mucci_1487663	1
Cluster 906	1497788	-1.22786	Mycelium	Mucci_1497788	1
Cluster 907	1558376	-2.18894	Mycelium	Mucci_1558376	1
Cluster 908	1381594	0	Not_differential	Mucci_1381594	1
Cluster 909	1528113	-3.88027	Mycelium	Mucci_1528113	1
Cluster 910	1394626	0	Not_differential	Mucci_1394626	1
Cluster 912	1490649	0	Not_differential	Mucci_1490649	1
Cluster 913	1454265	-1.21045	Mycelium	Mucci_1454265	1
Cluster 914	1481172	5.02538	Yeast	Mucci_1481172	1
Cluster 915	1501312	-1.82154	Mycelium	Mucci_1501312	1
Cluster 916	1518839	-6.64367	Mycelium	Mucci_1518839	1
Cluster 917	1526118	1.27117	Yeast	Mucci_1526118	1
Cluster 918	1546338	-2.9092	Mycelium	Mucci_1546338	1
Cluster 919	1597074	-8.18091	Mycelium	Mucci_1597074	1
Cluster 921	1530118	-3.18233	Mycelium	Mucci_1530118	1
Cluster 922	1365458	-6.90753	Mycelium	Mucci_1365458	1
Cluster 924	1542057	-2.13521	Mycelium	Mucci_1542057	1
Cluster 925	1461633	-2.80483	Mycelium	Mucci_1461633	1
Cluster 926	1521914	0	Not_differential	Mucci_1521914	1
Cluster 927	1524242	-1.29873	Mycelium	Mucci_1524242	1
Cluster 928	1600632	-3.14331	Mycelium	Mucci_1600632	1
Cluster 929	1326058	0	Not_differential	Mucci_1326058	1
Cluster 931	1457293	-2.97632	Mycelium	Mucci_1457293	1
Cluster 932	1508719	0	Not_differential	Mucci_1508719	1
Cluster 933	1534289	2.95493	Yeast	Mucci_1534289	1
Cluster 934	1392990	-4.87859	Mycelium	Mucci_1392990	1
Cluster 936	1452228	-8.64342	Mycelium	Mucci_1452228	1
Cluster 937	1481470	2.48057	Yeast	Mucci_1481470	1
Cluster 938	1489770	2.43398	Yeast	Mucci_1489770	1
Cluster 939	1490198	0	Not_differential	Mucci_1490198	1
Cluster 940	1503924	1.51453	Yeast	Mucci_1503924	1
Cluster 942	1539579	1.54125	Yeast	Mucci_1539579	1
Cluster 943	1542576	-2.38878	Mycelium	Mucci_1542576	1
Cluster 944	1588774	-4.62364	Mycelium	Mucci_1588774	1
Cluster 945	1545819	-3.49975	Mycelium	Mucci_1545819	1
Cluster 946	1446951	1.2897	Yeast	Mucci_1446951	1
Cluster 947	1532036	-3.50107	Mycelium	Mucci_1532036	1
Cluster 948	1447416	0	Not_differential	Mucci_1447416	1
Cluster 949	1582818	-4.55821	Mycelium	Mucci_1582818	1
Cluster 950	1587213	-6.37973	Mycelium	Mucci_1587213	1
Cluster 951	1489895	-5.76973	Mycelium	Mucci_1489895	1
Cluster 952	1511861	-1.60867	Mycelium	Mucci_1511861	1
Cluster 953	1524599	-1.96948	Mycelium	Mucci_1524599	1
Cluster 954	1563426	2.93304	Yeast	Mucci_1563426	1
Cluster 955	1372940	1.33965	Yeast	Mucci_1372940	1
Cluster 956	1374135	0	Not_differential	Mucci_1374135	1
Cluster 957	1538751	1.12111	Yeast	Mucci_1538751	1
Cluster 958	1586713	1.42414	Yeast	Mucci_1586713	1
Cluster 959	1592638	1.20778	Yeast	Mucci_1592638	1
Cluster 961	1541958	-1.80105	Mycelium	Mucci_1541958	1
Cluster 963	1596964	1.59214	Yeast	Mucci_1596964	1
Cluster 964	1359216	1.39352	Yeast	Mucci_1359216	1
Cluster 965	1461274	0	Not_differential	Mucci_1461274	1
Cluster 966	1520595	0	Not_differential	Mucci_1520595	1
Cluster 967	1523712	-3.18793	Mycelium	Mucci_1523712	1
Cluster 968	1582869	-7.04267	Mycelium	Mucci_1582869	1
Cluster 970	1354087	-7.04408	Mycelium	Mucci_1354087	1
Cluster 971	1356510	-1.47663	Mycelium	Mucci_1356510	1
Cluster 972	1370719	-2.91372	Mycelium	Mucci_1370719	1
Cluster 973	1476269	-1.46097	Mycelium	Mucci_1476269	1
Cluster 974	1501856	2.5894	Yeast	Mucci_1501856	1
Cluster 975	1484996	-6.67704	Mycelium	Mucci_1484996	1
Cluster 976	1494345	-6.38526	Mycelium	Mucci_1494345	1
Cluster 977	1549285	0	Not_differential	Mucci_1549285	1
Cluster 978	1498671	0	Not_differential	Mucci_1498671	1
Cluster 979	1546810	-7.55339	Mycelium	Mucci_1546810	1
Cluster 980	1462629	-7.47213	Mycelium	Mucci_1462629	1
Cluster 981	1469208	-3.19399	Mycelium	Mucci_1469208	1
Cluster 985	1457096	2.00137	Yeast	Mucci_1457096	1
Cluster 987	1488980	-1.46868	Mycelium	Mucci_1488980	1
Cluster 988	1490309	2.97788	Yeast	Mucci_1490309	1
Cluster 989	1501107	-1.31512	Mycelium	Mucci_1501107	1
Cluster 990	1502507	-1.53045	Mycelium	Mucci_1502507	1
Cluster 991	1519592	-2.43001	Mycelium	Mucci_1519592	1
Cluster 992	1526668	1.56787	Yeast	Mucci_1526668	1
Cluster 993	1597305	1.89111	Yeast	Mucci_1597305	1
Cluster 994	1471210	0	Not_differential	Mucci_1471210	1
Cluster 995	1484838	-9.73503	Mycelium	Mucci_1484838	1
Cluster 996	1495491	0	Not_differential	Mucci_1495491	1
Cluster 997	1551809	1.97909	Yeast	Mucci_1551809	1
Cluster 999	1502495	6.35606	Yeast	Mucci_1502495	1
Cluster 1000	1363150	0	Not_differential	Mucci_1363150	1
Cluster 1001	1392195	-6.57587	Mycelium	Mucci_1392195	1
Cluster 1002	1461869	-4.75735	Mycelium	Mucci_1461869	1
Cluster 1003	1520295	0	Not_differential	Mucci_1520295	1
Cluster 1004	1526830	2.00254	Yeast	Mucci_1526830	1
Cluster 1005	1540072	0	Not_differential	Mucci_1540072	1
Cluster 1006	1377042	-6.49794	Mycelium	Mucci_1377042	1
Cluster 1007	1453350	0	Not_differential	Mucci_1453350	1
Cluster 1009	1390652	-3.19494	Mycelium	Mucci_1390652	1
Cluster 1010	1524762	0	Not_differential	Mucci_1524762	1
Cluster 1011	1598584	-1.9824	Mycelium	Mucci_1598584	1
Cluster 1013	1374151	-7.89968	Mycelium	Mucci_1374151	1
Cluster 1014	1391583	0	Not_differential	Mucci_1391583	1
Cluster 1016	1484970	-2.78679	Mycelium	Mucci_1484970	1
Cluster 1017	1535585	0	Not_differential	Mucci_1535585	1
Cluster 1019	1585128	-2.21057	Mycelium	Mucci_1585128	1
Cluster 1021	1522484	0	Not_differential	Mucci_1522484	1
Cluster 1023	1453214	1.5779	Yeast	Mucci_1453214	1
Cluster 1024	1455216	0	Not_differential	Mucci_1455216	1
Cluster 1026	1509195	1.55289	Yeast	Mucci_1509195	1
Cluster 1027	1567818	1.47636	Yeast	Mucci_1567818	1
Cluster 1028	1482264	-4.74469	Mycelium	Mucci_1482264	1
Cluster 1030	1542121	-2.3092	Mycelium	Mucci_1542121	1
Cluster 1031	1172608	1.31752	Yeast	Mucci_1172608	1
Cluster 1032	1338180	1.01791	Yeast	Mucci_1338180	1
Cluster 1033	1457889	0	Not_differential	Mucci_1457889	1
Cluster 1034	1483184	2.75325	Yeast	Mucci_1483184	1
Cluster 1039	1355172	0	Not_differential	Mucci_1355172	1
Cluster 1040	1444915	0	Not_differential	Mucci_1444915	1
Cluster 1041	1475239	-2.06882	Mycelium	Mucci_1475239	1
Cluster 1042	1496847	-2.0676	Mycelium	Mucci_1496847	1
Cluster 1043	1343196	0	Not_differential	Mucci_1343196	1
Cluster 1044	1488663	-2.88288	Mycelium	Mucci_1488663	1
Cluster 1045	1492301	0	Not_differential	Mucci_1492301	1
Cluster 1046	1548069	0	Not_differential	Mucci_1548069	1
Cluster 1048	1597965	-2.76319	Mycelium	Mucci_1597965	1
Cluster 1049	1478761	0	Not_differential	Mucci_1478761	1
Cluster 1050	1527021	-8.90601	Mycelium	Mucci_1527021	1
Cluster 1051	1554179	0	Not_differential	Mucci_1554179	1
Cluster 1052	1361616	-7.4022	Mycelium	Mucci_1361616	1
Cluster 1053	1567261	1.29131	Yeast	Mucci_1567261	1
Cluster 1054	1586127	-6.56605	Mycelium	Mucci_1586127	1
Cluster 1055	1375115	-2.59268	Mycelium	Mucci_1375115	1
Cluster 1056	1391698	-1.19619	Mycelium	Mucci_1391698	1
Cluster 1057	1497290	-4.88617	Mycelium	Mucci_1497290	1
Cluster 1058	1543288	-1.6408	Mycelium	Mucci_1543288	1
Cluster 1059	1572658	0	Not_differential	Mucci_1572658	1
Cluster 1060	1491449	-1.14258	Mycelium	Mucci_1491449	1
Cluster 1061	1544143	-1.13548	Mycelium	Mucci_1544143	1
Cluster 1062	1550767	0	Not_differential	Mucci_1550767	1
Cluster 1064	1385426	0	Not_differential	Mucci_1385426	1
Cluster 1066	1463786	0	Not_differential	Mucci_1463786	1
Cluster 1067	1483038	1.1487	Yeast	Mucci_1483038	1
Cluster 1068	1495236	0	Not_differential	Mucci_1495236	1
Cluster 1069	1600724	0	Not_differential	Mucci_1600724	1
Cluster 1070	1470048	-3.53697	Mycelium	Mucci_1470048	1
Cluster 1072	1473455	0	Not_differential	Mucci_1473455	1
Cluster 1073	1479187	-6.93865	Mycelium	Mucci_1479187	1
Cluster 1074	1495317	0	Not_differential	Mucci_1495317	1
Cluster 1075	1506720	1.25625	Yeast	Mucci_1506720	1
Cluster 1076	1599792	-1.86708	Mycelium	Mucci_1599792	1
Cluster 1078	1499652	0	Not_differential	Mucci_1499652	1
Cluster 1079	1481243	-2.64182	Mycelium	Mucci_1481243	1
Cluster 1082	1384104	0	Not_differential	Mucci_1384104	1
Cluster 1083	1411855	1.9926	Yeast	Mucci_1411855	1
Cluster 1084	1524882	-1.77017	Mycelium	Mucci_1524882	1
Cluster 1085	1396433	-2.89725	Mycelium	Mucci_1396433	1
Cluster 1086	1534765	0	Not_differential	Mucci_1534765	1
Cluster 1088	1536697	0	Not_differential	Mucci_1536697	1
Cluster 1089	1368998	1.45555	Yeast	Mucci_1368998	1
Cluster 1090	1389798	0	Not_differential	Mucci_1389798	1
Cluster 1091	1455768	0	Not_differential	Mucci_1455768	1
Cluster 1092	1501111	-4.14974	Mycelium	Mucci_1501111	1
Cluster 1093	1468290	-5.26157	Mycelium	Mucci_1468290	1
Cluster 1094	1477391	3.6587	Yeast	Mucci_1477391	1
Cluster 1095	1504426	-3.7371	Mycelium	Mucci_1504426	1
Cluster 1096	1505143	-1.62032	Mycelium	Mucci_1505143	1
Cluster 1097	1510047	1.13212	Yeast	Mucci_1510047	1
Cluster 1098	1588237	2.6578	Yeast	Mucci_1588237	1
Cluster 1099	1393736	-7.22717	Mycelium	Mucci_1393736	1
Cluster 1100	1504225	0	Not_differential	Mucci_1504225	1
Cluster 1101	1366939	7.46384	Yeast	Mucci_1366939	1
Cluster 1102	1530268	-1.89097	Mycelium	Mucci_1530268	1
Cluster 1103	1518794	-2.22068	Mycelium	Mucci_1518794	1
Cluster 1104	1548377	-2.64078	Mycelium	Mucci_1548377	1
Cluster 1105	1566107	-3.00079	Mycelium	Mucci_1566107	1
Cluster 1106	1386918	-4.21468	Mycelium	Mucci_1386918	1
Cluster 1108	1524831	1.63932	Yeast	Mucci_1524831	1
Cluster 1109	1534533	0	Not_differential	Mucci_1534533	1
Cluster 1110	1550913	-2.30639	Mycelium	Mucci_1550913	1
Cluster 1111	1596169	0	Not_differential	Mucci_1596169	1
Cluster 1114	1500967	-3.03425	Mycelium	Mucci_1500967	1
Cluster 1115	1501432	0	Not_differential	Mucci_1501432	1
Cluster 1116	1449292	-1.01487	Mycelium	Mucci_1449292	1
Cluster 1118	1493285	-1.36385	Mycelium	Mucci_1493285	1
Cluster 1119	1494565	-2.23998	Mycelium	Mucci_1494565	1
Cluster 1120	1512806	-1.19661	Mycelium	Mucci_1512806	1
Cluster 1121	1597426	-1.76987	Mycelium	Mucci_1597426	1
Cluster 1122	1384160	0	Not_differential	Mucci_1384160	1
Cluster 1123	1396604	0	Not_differential	Mucci_1396604	1
Cluster 1124	1465656	-6.00381	Mycelium	Mucci_1465656	1
Cluster 1125	1485531	1.6044	Yeast	Mucci_1485531	1
Cluster 1126	1528257	0	Not_differential	Mucci_1528257	1
Cluster 1130	1532744	0	Not_differential	Mucci_1532744	1
Cluster 1132	1095467	0	Not_differential	Mucci_1095467	1
Cluster 1134	1473738	-1.8774	Mycelium	Mucci_1473738	1
Cluster 1135	1537721	-2.82264	Mycelium	Mucci_1537721	1
Cluster 1136	1357266	-1.91651	Mycelium	Mucci_1357266	1
Cluster 1137	1462238	-1.14004	Mycelium	Mucci_1462238	1
Cluster 1139	1546223	-1.02634	Mycelium	Mucci_1546223	1
Cluster 1140	1557105	6.14858	Yeast	Mucci_1557105	1
Cluster 1142	1600670	-2.7586	Mycelium	Mucci_1600670	1
Cluster 1144	1417603	1.46975	Yeast	Mucci_1417603	1
Cluster 1145	1509447	1.0831	Yeast	Mucci_1509447	1
Cluster 1146	1332224	1.32033	Yeast	Mucci_1332224	1
Cluster 1147	1514737	2.16578	Yeast	Mucci_1514737	1
Cluster 1150	1597580	0	Not_differential	Mucci_1597580	1
Cluster 1152	1505728	-1.53168	Mycelium	Mucci_1505728	1
Cluster 1153	1514182	0	Not_differential	Mucci_1514182	1
Cluster 1154	1128198	0	Not_differential	Mucci_1128198	1
Cluster 1155	1439783	1.74829	Yeast	Mucci_1439783	1
Cluster 1156	1535072	0	Not_differential	Mucci_1535072	1
Cluster 1157	1543334	-2.54043	Mycelium	Mucci_1543334	1
Cluster 1158	1462315	0	Not_differential	Mucci_1462315	1
Cluster 1160	1464304	-1.25005	Mycelium	Mucci_1464304	1
Cluster 1161	1487793	-2.48419	Mycelium	Mucci_1487793	1
Cluster 1163	1516451	2.70863	Yeast	Mucci_1516451	1
Cluster 1164	1380305	0	Not_differential	Mucci_1380305	1
Cluster 1165	1540667	0	Not_differential	Mucci_1540667	1
Cluster 1166	1557921	1.69753	Yeast	Mucci_1557921	1
Cluster 1167	1363706	4.17206	Yeast	Mucci_1363706	1
Cluster 1168	1471074	-1.97461	Mycelium	Mucci_1471074	1
Cluster 1169	1484346	1.11914	Yeast	Mucci_1484346	1
Cluster 1170	1511305	4.35673	Yeast	Mucci_1511305	1
Cluster 1171	1520987	-1.06266	Mycelium	Mucci_1520987	1
Cluster 1172	1477841	2.57361	Yeast	Mucci_1477841	1
Cluster 1173	1526377	-1.46834	Mycelium	Mucci_1526377	1
Cluster 1175	1385353	2.01159	Yeast	Mucci_1385353	1
Cluster 1176	1471195	-4.82851	Mycelium	Mucci_1471195	1
Cluster 1177	1474587	-2.92511	Mycelium	Mucci_1474587	1
Cluster 1178	1524788	-2.25812	Mycelium	Mucci_1524788	1
Cluster 1179	1551951	-1.11927	Mycelium	Mucci_1551951	1
Cluster 1180	1471551	0	Not_differential	Mucci_1471551	1
Cluster 1182	1521389	2.50214	Yeast	Mucci_1521389	1
Cluster 1183	1455988	0	Not_differential	Mucci_1455988	1
Cluster 1185	1396154	0	Not_differential	Mucci_1396154	1
Cluster 1186	1455283	0	Not_differential	Mucci_1455283	1
Cluster 1187	1557834	-1.58859	Mycelium	Mucci_1557834	1
Cluster 1188	1593413	-3.75643	Mycelium	Mucci_1593413	1
Cluster 1189	1355369	-3.0814	Mycelium	Mucci_1355369	1
Cluster 1190	1474293	0	Not_differential	Mucci_1474293	1
Cluster 1191	1519910	4.34906	Yeast	Mucci_1519910	1
Cluster 1192	1366981	2.97386	Yeast	Mucci_1366981	1
Cluster 1193	1389711	0	Not_differential	Mucci_1389711	1
Cluster 1195	1460707	0	Not_differential	Mucci_1460707	1
Cluster 1196	1526423	1.36614	Yeast	Mucci_1526423	1
Cluster 1198	1587764	0	Not_differential	Mucci_1587764	1
Cluster 1199	1541908	0	Not_differential	Mucci_1541908	1
Cluster 1200	1561508	0	Not_differential	Mucci_1561508	1
Cluster 1202	1500378	0	Not_differential	Mucci_1500378	1
Cluster 1203	1553611	0	Not_differential	Mucci_1553611	1
Cluster 1204	1391405	0	Not_differential	Mucci_1391405	1
Cluster 1205	1465840	1.6877	Yeast	Mucci_1465840	1
Cluster 1206	1516955	0	Not_differential	Mucci_1516955	1
Cluster 1207	1554855	-2.31282	Mycelium	Mucci_1554855	1
Cluster 1208	1556435	1.11562	Yeast	Mucci_1556435	1
Cluster 1209	1321417	-6.07457	Mycelium	Mucci_1321417	1
Cluster 1210	1448050	0	Not_differential	Mucci_1448050	1
Cluster 1211	1564191	0	Not_differential	Mucci_1564191	1
Cluster 1212	1106105	-5.49653	Mycelium	Mucci_1106105	1
Cluster 1213	1349610	0	Not_differential	Mucci_1349610	1
Cluster 1214	1506167	-1.13891	Mycelium	Mucci_1506167	1
Cluster 1215	1510917	1.06096	Yeast	Mucci_1510917	1
Cluster 1216	1324484	-1.76897	Mycelium	Mucci_1324484	1
Cluster 1217	1522644	2.36327	Yeast	Mucci_1522644	1
Cluster 1218	1550434	0	Not_differential	Mucci_1550434	1
Cluster 1219	1575109	-8.02345	Mycelium	Mucci_1575109	1
Cluster 1223	1478194	0	Not_differential	Mucci_1478194	1
Cluster 1224	1512176	0	Not_differential	Mucci_1512176	1
Cluster 1225	1520342	0	Not_differential	Mucci_1520342	1
Cluster 1226	1528884	0	Not_differential	Mucci_1528884	1
Cluster 1227	1583501	-4.53572	Mycelium	Mucci_1583501	1
Cluster 1229	1454648	1.17885	Yeast	Mucci_1454648	1
Cluster 1233	1444784	0	Not_differential	Mucci_1444784	1
Cluster 1234	1497574	-2.24426	Mycelium	Mucci_1497574	1
Cluster 1235	1515076	-5.83832	Mycelium	Mucci_1515076	1
Cluster 1236	1520159	-2.65972	Mycelium	Mucci_1520159	1
Cluster 1238	1529199	2.41664	Yeast	Mucci_1529199	1
Cluster 1239	1593943	0	Not_differential	Mucci_1593943	1
Cluster 1240	1596584	0	Not_differential	Mucci_1596584	1
Cluster 1241	1601191	1.53816	Yeast	Mucci_1601191	1
Cluster 1242	1443387	2.11098	Yeast	Mucci_1443387	1
Cluster 1243	1536423	1.71348	Yeast	Mucci_1536423	1
Cluster 1244	1542407	-3.97359	Mycelium	Mucci_1542407	1
Cluster 1245	1587543	-7.96549	Mycelium	Mucci_1587543	1
Cluster 1246	1597405	3.274	Yeast	Mucci_1597405	1
Cluster 1248	1553721	1.35152	Yeast	Mucci_1553721	1
Cluster 1249	1465679	-2.37784	Mycelium	Mucci_1465679	1
Cluster 1250	1466053	-3.24554	Mycelium	Mucci_1466053	1
Cluster 1251	1503619	-2.6066	Mycelium	Mucci_1503619	1
Cluster 1252	1509609	0	Not_differential	Mucci_1509609	1
Cluster 1254	1530769	-1.55941	Mycelium	Mucci_1530769	1
Cluster 1255	1503213	2.10001	Yeast	Mucci_1503213	1
Cluster 1256	1510383	2.40571	Yeast	Mucci_1510383	1
Cluster 1257	1523377	1.56078	Yeast	Mucci_1523377	1
Cluster 1258	1548221	-1.62221	Mycelium	Mucci_1548221	1
Cluster 1260	1125752	0	Not_differential	Mucci_1125752	1
Cluster 1261	1441683	-2.34572	Mycelium	Mucci_1441683	1
Cluster 1262	1463775	2.92432	Yeast	Mucci_1463775	1
Cluster 1263	1538881	4.37742	Yeast	Mucci_1538881	1
Cluster 1264	1556829	-2.196	Mycelium	Mucci_1556829	1
Cluster 1266	1510681	1.20318	Yeast	Mucci_1510681	1
Cluster 1267	1569674	0	Not_differential	Mucci_1569674	1
Cluster 1269	1499754	1.05297	Yeast	Mucci_1499754	1
Cluster 1270	1586208	0	Not_differential	Mucci_1586208	1
Cluster 1271	1141516	0	Not_differential	Mucci_1141516	1
Cluster 1273	1497478	-11.1448	Mycelium	Mucci_1497478	1
Cluster 1274	1506917	1.58322	Yeast	Mucci_1506917	1
Cluster 1275	1520335	-4.36178	Mycelium	Mucci_1520335	1
Cluster 1276	1530379	1.53799	Yeast	Mucci_1530379	1
Cluster 1277	1360518	0	Not_differential	Mucci_1360518	1
Cluster 1278	1382830	1.1908	Yeast	Mucci_1382830	1
Cluster 1279	1548713	-1.42157	Mycelium	Mucci_1548713	1
Cluster 1280	1599338	0	Not_differential	Mucci_1599338	1
Cluster 1281	1464935	-2.43533	Mycelium	Mucci_1464935	1
Cluster 1282	1417931	-7.83873	Mycelium	Mucci_1417931	1
Cluster 1283	1549797	0	Not_differential	Mucci_1549797	1
Cluster 1284	1456246	0	Not_differential	Mucci_1456246	1
Cluster 1285	1479497	-1.11727	Mycelium	Mucci_1479497	1
Cluster 1286	1511477	2.12838	Yeast	Mucci_1511477	1
Cluster 1288	1454092	-9.82709	Mycelium	Mucci_1454092	1
Cluster 1289	1510347	0	Not_differential	Mucci_1510347	1
Cluster 1290	1533932	-8.01045	Mycelium	Mucci_1533932	1
Cluster 1291	1540682	1.45216	Yeast	Mucci_1540682	1
Cluster 1292	1353435	-6.64232	Mycelium	Mucci_1353435	1
Cluster 1293	1493931	1.92085	Yeast	Mucci_1493931	1
Cluster 1294	1518232	-1.59268	Mycelium	Mucci_1518232	1
Cluster 1295	1584753	-1.30068	Mycelium	Mucci_1584753	1
Cluster 1296	1354411	2.00155	Yeast	Mucci_1354411	1
Cluster 1298	1468507	3.64279	Yeast	Mucci_1468507	1
Cluster 1299	1500684	-6.47152	Mycelium	Mucci_1500684	1
Cluster 1300	1506181	-2.27732	Mycelium	Mucci_1506181	1
Cluster 1301	1526714	0	Not_differential	Mucci_1526714	1
Cluster 1302	1490200	0	Not_differential	Mucci_1490200	1
Cluster 1303	1478118	0	Not_differential	Mucci_1478118	1
Cluster 1304	1513266	1.67857	Yeast	Mucci_1513266	1
Cluster 1307	1518127	-4.1534	Mycelium	Mucci_1518127	1
Cluster 1308	1370067	0	Not_differential	Mucci_1370067	1
Cluster 1309	1503086	0	Not_differential	Mucci_1503086	1
Cluster 1310	1511327	-7.27616	Mycelium	Mucci_1511327	1
Cluster 1311	1521722	1.76279	Yeast	Mucci_1521722	1
Cluster 1312	1463491	-2.99633	Mycelium	Mucci_1463491	1
Cluster 1314	1144010	-3.12068	Mycelium	Mucci_1144010	1
Cluster 1315	1479361	0	Not_differential	Mucci_1479361	1
Cluster 1316	1503785	-8.94494	Mycelium	Mucci_1503785	1
Cluster 1317	1458605	1.5787	Yeast	Mucci_1458605	1
Cluster 1321	1360470	1.12325	Yeast	Mucci_1360470	1
Cluster 1322	1505689	0	Not_differential	Mucci_1505689	1
Cluster 1323	1524941	-4.56753	Mycelium	Mucci_1524941	1
Cluster 1324	1559080	-1.67097	Mycelium	Mucci_1559080	1
Cluster 1325	1366719	-1.37546	Mycelium	Mucci_1366719	1
Cluster 1327	1529084	-3.62628	Mycelium	Mucci_1529084	1
Cluster 1328	1535223	-1.55362	Mycelium	Mucci_1535223	1
Cluster 1329	1573597	-5.58011	Mycelium	Mucci_1573597	1
Cluster 1330	1354524	-4.33777	Mycelium	Mucci_1354524	1
Cluster 1331	1365840	-1.08934	Mycelium	Mucci_1365840	1
Cluster 1332	1452939	-3.00656	Mycelium	Mucci_1452939	1
Cluster 1333	1477485	1.84293	Yeast	Mucci_1477485	1
Cluster 1334	1586748	0	Not_differential	Mucci_1586748	1
Cluster 1336	1339505	-2.34645	Mycelium	Mucci_1339505	1
Cluster 1337	1508379	-3.64474	Mycelium	Mucci_1508379	1
Cluster 1338	1367223	-2.53645	Mycelium	Mucci_1367223	1
Cluster 1339	1513949	-4.22203	Mycelium	Mucci_1513949	1
Cluster 1340	1531586	-3.94074	Mycelium	Mucci_1531586	1
Cluster 1341	1553060	0	Not_differential	Mucci_1553060	1
Cluster 1343	1511148	0	Not_differential	Mucci_1511148	1
Cluster 1344	1519041	-1.58442	Mycelium	Mucci_1519041	1
Cluster 1345	1348301	-3.72397	Mycelium	Mucci_1348301	1
Cluster 1346	1453569	-5.09133	Mycelium	Mucci_1453569	1
Cluster 1347	1488326	-1.94017	Mycelium	Mucci_1488326	1
Cluster 1348	1518065	4.67448	Yeast	Mucci_1518065	1
Cluster 1349	1584910	0	Not_differential	Mucci_1584910	1
Cluster 1350	1448038	1.43629	Yeast	Mucci_1448038	1
Cluster 1351	1528361	0	Not_differential	Mucci_1528361	1
Cluster 1352	1555071	-3.20291	Mycelium	Mucci_1555071	1
Cluster 1353	1600961	-1.0008	Mycelium	Mucci_1600961	1
Cluster 1354	1126324	-1.87229	Mycelium	Mucci_1126324	1
Cluster 1355	1384248	-3.74682	Mycelium	Mucci_1384248	1
Cluster 1356	1115782	-11.3621	Mycelium	Mucci_1115782	1
Cluster 1358	1459294	-2.75809	Mycelium	Mucci_1459294	1
Cluster 1359	1534936	-2.45982	Mycelium	Mucci_1534936	1
Cluster 1361	1592151	1.09696	Yeast	Mucci_1592151	1
Cluster 1362	1489956	0	Not_differential	Mucci_1489956	1
Cluster 1363	1497352	-2.58766	Mycelium	Mucci_1497352	1
Cluster 1364	1460957	-4.16479	Mycelium	Mucci_1460957	1
Cluster 1365	1465355	1.13632	Yeast	Mucci_1465355	1
Cluster 1366	1492313	-7.002	Mycelium	Mucci_1492313	1
Cluster 1367	1494035	-3.38733	Mycelium	Mucci_1494035	1
Cluster 1368	1524651	2.12482	Yeast	Mucci_1524651	1
Cluster 1370	1506626	0	Not_differential	Mucci_1506626	1
Cluster 1371	1516668	0	Not_differential	Mucci_1516668	1
Cluster 1372	1553980	1.8908	Yeast	Mucci_1553980	1
Cluster 1373	1352156	2.113	Yeast	Mucci_1352156	1
Cluster 1376	1344199	0	Not_differential	Mucci_1344199	1
Cluster 1378	1514839	-2.84881	Mycelium	Mucci_1514839	1
Cluster 1379	1538086	2.59652	Yeast	Mucci_1538086	1
Cluster 1380	1541841	0	Not_differential	Mucci_1541841	1
Cluster 1381	1586774	1.59518	Yeast	Mucci_1586774	1
Cluster 1382	1468399	0	Not_differential	Mucci_1468399	1
Cluster 1383	1510162	-1.13255	Mycelium	Mucci_1510162	1
Cluster 1384	1596560	-7.01966	Mycelium	Mucci_1596560	1
Cluster 1385	1447337	0	Not_differential	Mucci_1447337	1
Cluster 1387	1320004	2.00751	Yeast	Mucci_1320004	1
Cluster 1388	1321633	0	Not_differential	Mucci_1321633	1
Cluster 1389	1469221	-1.62595	Mycelium	Mucci_1469221	1
Cluster 1390	1489326	0	Not_differential	Mucci_1489326	1
Cluster 1391	1522998	2.25956	Yeast	Mucci_1522998	1
Cluster 1392	1537505	0	Not_differential	Mucci_1537505	1
Cluster 1393	1544304	-1.26606	Mycelium	Mucci_1544304	1
Cluster 1394	1584817	-5.23637	Mycelium	Mucci_1584817	1
Cluster 1395	1362981	-1.35957	Mycelium	Mucci_1362981	1
Cluster 1396	1447385	-1.03698	Mycelium	Mucci_1447385	1
Cluster 1397	1499181	0	Not_differential	Mucci_1499181	1
Cluster 1398	1525770	0	Not_differential	Mucci_1525770	1
Cluster 1399	1528872	0	Not_differential	Mucci_1528872	1
Cluster 1400	1561494	1.31193	Yeast	Mucci_1561494	1
Cluster 1401	1545777	1.43253	Yeast	Mucci_1545777	1
Cluster 1403	1447536	-2.81388	Mycelium	Mucci_1447536	1
Cluster 1404	1454082	0	Not_differential	Mucci_1454082	1
Cluster 1405	1507480	1.66832	Yeast	Mucci_1507480	1
Cluster 1406	1518748	0	Not_differential	Mucci_1518748	1
Cluster 1407	1451930	1.3033	Yeast	Mucci_1451930	1
Cluster 1408	1458917	-3.34833	Mycelium	Mucci_1458917	1
Cluster 1409	1498689	-3.23359	Mycelium	Mucci_1498689	1
Cluster 1411	1480783	-2.20402	Mycelium	Mucci_1480783	1
Cluster 1412	1524128	0	Not_differential	Mucci_1524128	1
Cluster 1413	1540670	-5.93529	Mycelium	Mucci_1540670	1
Cluster 1414	1546573	-8.93652	Mycelium	Mucci_1546573	1
Cluster 1415	1319340	-2.45576	Mycelium	Mucci_1319340	1
Cluster 1416	1468077	0	Not_differential	Mucci_1468077	1
Cluster 1418	1515545	0	Not_differential	Mucci_1515545	1
Cluster 1419	1519532	0	Not_differential	Mucci_1519532	1
Cluster 1420	1535774	0	Not_differential	Mucci_1535774	1
Cluster 1421	1089537	2.54651	Yeast	Mucci_1089537	1
Cluster 1423	1457797	-1.37644	Mycelium	Mucci_1457797	1
Cluster 1424	1520352	0	Not_differential	Mucci_1520352	1
Cluster 1425	1596060	1.2318	Yeast	Mucci_1596060	1
Cluster 1427	1600323	0	Not_differential	Mucci_1600323	1
Cluster 1428	1385035	-3.33381	Mycelium	Mucci_1385035	1
Cluster 1430	1510721	-1.6951	Mycelium	Mucci_1510721	1
Cluster 1431	1538065	1.07622	Yeast	Mucci_1538065	1
Cluster 1432	1360745	0	Not_differential	Mucci_1360745	1
Cluster 1433	1479787	2.20781	Yeast	Mucci_1479787	1
Cluster 1434	1525910	0	Not_differential	Mucci_1525910	1
Cluster 1435	1537960	-6.26	Mycelium	Mucci_1537960	1
Cluster 1436	1543044	0	Not_differential	Mucci_1543044	1
Cluster 1438	1485583	4.64158	Yeast	Mucci_1485583	1
Cluster 1439	1520087	0	Not_differential	Mucci_1520087	1
Cluster 1440	1372401	-7.98863	Mycelium	Mucci_1372401	1
Cluster 1442	1480155	0	Not_differential	Mucci_1480155	1
Cluster 1444	1487682	1.95015	Yeast	Mucci_1487682	1
Cluster 1448	1527318	0	Not_differential	Mucci_1527318	1
Cluster 1449	1563383	-1.73236	Mycelium	Mucci_1563383	1
Cluster 1450	1459775	3.21361	Yeast	Mucci_1459775	1
Cluster 1451	1555734	-3.15871	Mycelium	Mucci_1555734	1
Cluster 1456	1467875	-1.21042	Mycelium	Mucci_1467875	1
Cluster 1457	1522499	-1.02425	Mycelium	Mucci_1522499	1
Cluster 1458	1557876	-1.22193	Mycelium	Mucci_1557876	1
Cluster 1460	1370913	-8.18666	Mycelium	Mucci_1370913	1
Cluster 1461	1464356	1.16697	Yeast	Mucci_1464356	1
Cluster 1463	1451822	3.58376	Yeast	Mucci_1451822	1
Cluster 1464	1533270	0	Not_differential	Mucci_1533270	1
Cluster 1465	1549372	-4.1795	Mycelium	Mucci_1549372	1
Cluster 1466	1355556	1.06868	Yeast	Mucci_1355556	1
Cluster 1469	1516145	-7.6775	Mycelium	Mucci_1516145	1
Cluster 1470	1534363	-2.79536	Mycelium	Mucci_1534363	1
Cluster 1471	1541202	0	Not_differential	Mucci_1541202	1
Cluster 1473	1601194	3.01986	Yeast	Mucci_1601194	1
Cluster 1475	1482501	-5.73214	Mycelium	Mucci_1482501	1
Cluster 1476	1533533	-2.57541	Mycelium	Mucci_1533533	1
Cluster 1479	1466266	-4.8129	Mycelium	Mucci_1466266	1
Cluster 1480	1514924	-6.79058	Mycelium	Mucci_1514924	1
Cluster 1481	1517492	1.58558	Yeast	Mucci_1517492	1
Cluster 1482	1550141	-1.54711	Mycelium	Mucci_1550141	1
Cluster 1483	1370343	-5.27074	Mycelium	Mucci_1370343	1
Cluster 1484	1483648	-4.09714	Mycelium	Mucci_1483648	1
Cluster 1485	1509260	-2.95284	Mycelium	Mucci_1509260	1
Cluster 1486	1384767	-4.61966	Mycelium	Mucci_1384767	1
Cluster 1487	1442540	2.31744	Yeast	Mucci_1442540	1
Cluster 1488	1594767	0	Not_differential	Mucci_1594767	1
Cluster 1490	1548463	3.50154	Yeast	Mucci_1548463	1
Cluster 1492	1475249	-1.71232	Mycelium	Mucci_1475249	1
Cluster 1495	1548293	1.66734	Yeast	Mucci_1548293	1
Cluster 1496	1551205	0	Not_differential	Mucci_1551205	1
Cluster 1498	1480560	0	Not_differential	Mucci_1480560	1
Cluster 1499	1520688	-2.31733	Mycelium	Mucci_1520688	1
Cluster 1500	1536658	1.65003	Yeast	Mucci_1536658	1
Cluster 1501	1466895	1.72524	Yeast	Mucci_1466895	1
Cluster 1502	1544770	2.6876	Yeast	Mucci_1544770	1
Cluster 1503	1560534	0	Not_differential	Mucci_1560534	1
Cluster 1504	1388821	-4.83536	Mycelium	Mucci_1388821	1
Cluster 1507	1512432	-1.63727	Mycelium	Mucci_1512432	1
Cluster 1509	1467407	-1.12713	Mycelium	Mucci_1467407	1
Cluster 1510	1527777	-1.19835	Mycelium	Mucci_1527777	1
Cluster 1511	1562467	-3.17953	Mycelium	Mucci_1562467	1
Cluster 1514	1461079	1.1277	Yeast	Mucci_1461079	1
Cluster 1515	1461511	0	Not_differential	Mucci_1461511	1
Cluster 1517	1593470	4.82471	Yeast	Mucci_1593470	1
Cluster 1518	1370833	3.17176	Yeast	Mucci_1370833	1
Cluster 1521	1373542	0	Not_differential	Mucci_1373542	1
Cluster 1522	1523594	-6.15916	Mycelium	Mucci_1523594	1
Cluster 1523	1531343	0	Not_differential	Mucci_1531343	1
Cluster 1524	1533317	-1.11183	Mycelium	Mucci_1533317	1
Cluster 1526	1590550	1.11676	Yeast	Mucci_1590550	1
Cluster 1527	1041319	-2.58906	Mycelium	Mucci_1041319	1
Cluster 1528	1572680	-5.39837	Mycelium	Mucci_1572680	1
Cluster 1529	1009515	-1.11627	Mycelium	Mucci_1009515	1
Cluster 1530	1503944	0	Not_differential	Mucci_1503944	1
Cluster 1531	1529057	1.10908	Yeast	Mucci_1529057	1
Cluster 1532	1545615	3.36162	Yeast	Mucci_1545615	1
Cluster 1533	1596977	-3.36983	Mycelium	Mucci_1596977	1
Cluster 1534	1496782	0	Not_differential	Mucci_1496782	1
Cluster 1535	1528369	-1.03923	Mycelium	Mucci_1528369	1
Cluster 1536	1453813	0	Not_differential	Mucci_1453813	1
Cluster 1537	1473219	-3.57585	Mycelium	Mucci_1473219	1
Cluster 1538	1486170	0	Not_differential	Mucci_1486170	1
Cluster 1539	1489950	0	Not_differential	Mucci_1489950	1
Cluster 1540	1544072	-3.97927	Mycelium	Mucci_1544072	1
Cluster 1541	1351166	-4.71804	Mycelium	Mucci_1351166	1
Cluster 1543	1592582	-3.93569	Mycelium	Mucci_1592582	1
Cluster 1544	1595824	0	Not_differential	Mucci_1595824	1
Cluster 1545	1471209	0	Not_differential	Mucci_1471209	1
Cluster 1546	1478342	-1.42238	Mycelium	Mucci_1478342	1
Cluster 1547	1514747	-4.99363	Mycelium	Mucci_1514747	1
Cluster 1548	1451840	1.27993	Yeast	Mucci_1451840	1
Cluster 1549	1495322	1.02543	Yeast	Mucci_1495322	1
Cluster 1550	1520126	-1.3874	Mycelium	Mucci_1520126	1
Cluster 1551	1447828	-1.96853	Mycelium	Mucci_1447828	1
Cluster 1553	1512527	-2.98325	Mycelium	Mucci_1512527	1
Cluster 1554	1528724	1.40227	Yeast	Mucci_1528724	1
Cluster 1555	1321644	1.10651	Yeast	Mucci_1321644	1
Cluster 1556	1478332	-1.16292	Mycelium	Mucci_1478332	1
Cluster 1557	1550481	0	Not_differential	Mucci_1550481	1
Cluster 1559	1455837	1.03857	Yeast	Mucci_1455837	1
Cluster 1560	1464774	-1.79798	Mycelium	Mucci_1464774	1
Cluster 1561	1489514	2.57578	Yeast	Mucci_1489514	1
Cluster 1563	1480199	-7.53311	Mycelium	Mucci_1480199	1
Cluster 1564	1484801	-1.83339	Mycelium	Mucci_1484801	1
Cluster 1565	1485083	-3.68425	Mycelium	Mucci_1485083	1
Cluster 1566	1536417	2.90076	Yeast	Mucci_1536417	1
Cluster 1567	1592585	-1.23195	Mycelium	Mucci_1592585	1
Cluster 1568	1479203	-1.92624	Mycelium	Mucci_1479203	1
Cluster 1569	1499410	2.10588	Yeast	Mucci_1499410	1
Cluster 1571	1514297	2.34236	Yeast	Mucci_1514297	1
Cluster 1572	1593327	0	Not_differential	Mucci_1593327	1
Cluster 1573	1464650	2.08781	Yeast	Mucci_1464650	1
Cluster 1574	1482616	-1.01015	Mycelium	Mucci_1482616	1
Cluster 1575	1517016	-1.04893	Mycelium	Mucci_1517016	1
Cluster 1577	1373392	-4.20456	Mycelium	Mucci_1373392	1
Cluster 1578	1481294	-1.25974	Mycelium	Mucci_1481294	1
Cluster 1580	1544675	-3.86404	Mycelium	Mucci_1544675	1
Cluster 1581	1593775	0	Not_differential	Mucci_1593775	1
Cluster 1583	1360046	0	Not_differential	Mucci_1360046	1
Cluster 1584	1386807	0	Not_differential	Mucci_1386807	1
Cluster 1585	1389670	-1.96061	Mycelium	Mucci_1389670	1
Cluster 1586	1500093	0	Not_differential	Mucci_1500093	1
Cluster 1588	1565517	1.03705	Yeast	Mucci_1565517	1
Cluster 1589	1159667	-1.49841	Mycelium	Mucci_1159667	1
Cluster 1590	1367862	-2.9448	Mycelium	Mucci_1367862	1
Cluster 1591	1478896	-1.47698	Mycelium	Mucci_1478896	1
Cluster 1592	1519467	0	Not_differential	Mucci_1519467	1
Cluster 1594	1583336	-1.0593	Mycelium	Mucci_1583336	1
Cluster 1595	1456858	1.99894	Yeast	Mucci_1456858	1
Cluster 1596	1460663	-1.60778	Mycelium	Mucci_1460663	1
Cluster 1597	1519912	-3.5545	Mycelium	Mucci_1519912	1
Cluster 1598	1381524	-3.56197	Mycelium	Mucci_1381524	1
Cluster 1599	1415883	-1.68049	Mycelium	Mucci_1415883	1
Cluster 1601	1526608	-3.77836	Mycelium	Mucci_1526608	1
Cluster 1602	1536522	1.61231	Yeast	Mucci_1536522	1
Cluster 1603	1552111	-2.95678	Mycelium	Mucci_1552111	1
Cluster 1604	1375399	-10.6912	Mycelium	Mucci_1375399	1
Cluster 1605	1450370	1.45784	Yeast	Mucci_1450370	1
Cluster 1606	1486502	-1.01613	Mycelium	Mucci_1486502	1
Cluster 1607	1495537	-8.36532	Mycelium	Mucci_1495537	1
Cluster 1608	1555563	-1.08599	Mycelium	Mucci_1555563	1
Cluster 1609	1493821	1.96956	Yeast	Mucci_1493821	1
Cluster 1610	1499364	2.32305	Yeast	Mucci_1499364	1
Cluster 1611	1507061	5.03435	Yeast	Mucci_1507061	1
Cluster 1612	1535746	0	Not_differential	Mucci_1535746	1
Cluster 1614	1594191	-1.15085	Mycelium	Mucci_1594191	1
Cluster 1615	1365138	-1.35067	Mycelium	Mucci_1365138	1
Cluster 1616	1454016	-1.75144	Mycelium	Mucci_1454016	1
Cluster 1617	1526571	0	Not_differential	Mucci_1526571	1
Cluster 1618	1109149	0	Not_differential	Mucci_1109149	1
Cluster 1619	1359273	-1.01029	Mycelium	Mucci_1359273	1
Cluster 1620	1444752	-1.17605	Mycelium	Mucci_1444752	1
Cluster 1621	1478594	0	Not_differential	Mucci_1478594	1
Cluster 1622	1485415	-4.01448	Mycelium	Mucci_1485415	1
Cluster 1623	1504003	0	Not_differential	Mucci_1504003	1
Cluster 1624	1528165	-2.97699	Mycelium	Mucci_1528165	1
Cluster 1625	1370267	1.88317	Yeast	Mucci_1370267	1
Cluster 1626	1412751	0	Not_differential	Mucci_1412751	1
Cluster 1627	1473161	-2.50591	Mycelium	Mucci_1473161	1
Cluster 1628	1489836	2.12042	Yeast	Mucci_1489836	1
Cluster 1629	1536786	0	Not_differential	Mucci_1536786	1
Cluster 1630	1594720	-8.19887	Mycelium	Mucci_1594720	1
Cluster 1631	1595690	0	Not_differential	Mucci_1595690	1
Cluster 1633	1495397	0	Not_differential	Mucci_1495397	1
Cluster 1635	1528739	2.45916	Yeast	Mucci_1528739	1
Cluster 1638	1589529	-6.17856	Mycelium	Mucci_1589529	1
Cluster 1639	1481447	-1.76428	Mycelium	Mucci_1481447	1
Cluster 1640	1596619	-1.43104	Mycelium	Mucci_1596619	1
Cluster 1641	1386453	-5.68328	Mycelium	Mucci_1386453	1
Cluster 1642	1504306	-4.73071	Mycelium	Mucci_1504306	1
Cluster 1643	1516079	-5.18018	Mycelium	Mucci_1516079	1
Cluster 1644	1535716	0	Not_differential	Mucci_1535716	1
Cluster 1645	1586462	-5.12972	Mycelium	Mucci_1586462	1
Cluster 1646	1598347	-6.51246	Mycelium	Mucci_1598347	1
Cluster 1647	1345463	0	Not_differential	Mucci_1345463	1
Cluster 1648	1492014	0	Not_differential	Mucci_1492014	1
Cluster 1649	1503098	3.82302	Yeast	Mucci_1503098	1
Cluster 1650	1509883	0	Not_differential	Mucci_1509883	1
Cluster 1651	1553622	0	Not_differential	Mucci_1553622	1
Cluster 1655	1529156	-8.37562	Mycelium	Mucci_1529156	1
Cluster 1656	1554437	0	Not_differential	Mucci_1554437	1
Cluster 1657	1565065	1.58465	Yeast	Mucci_1565065	1
Cluster 1658	1482333	-2.8753	Mycelium	Mucci_1482333	1
Cluster 1659	1489601	2.05187	Yeast	Mucci_1489601	1
Cluster 1660	1587034	-6.82791	Mycelium	Mucci_1587034	1
Cluster 1661	1451753	-6.97808	Mycelium	Mucci_1451753	1
Cluster 1662	1471313	3.20189	Yeast	Mucci_1471313	1
Cluster 1663	1478813	1.62929	Yeast	Mucci_1478813	1
Cluster 1664	1550550	-2.37077	Mycelium	Mucci_1550550	1
Cluster 1665	1319368	0	Not_differential	Mucci_1319368	1
Cluster 1666	1319860	-4.90767	Mycelium	Mucci_1319860	1
Cluster 1668	1462829	1.14627	Yeast	Mucci_1462829	1
Cluster 1669	1526727	0	Not_differential	Mucci_1526727	1
Cluster 1670	1557283	3.95477	Yeast	Mucci_1557283	1
Cluster 1671	1387697	-7.15552	Mycelium	Mucci_1387697	1
Cluster 1673	1517144	2.61855	Yeast	Mucci_1517144	1
Cluster 1674	1532165	2.37937	Yeast	Mucci_1532165	1
Cluster 1676	1386575	-5.26451	Mycelium	Mucci_1386575	1
Cluster 1677	1500185	0	Not_differential	Mucci_1500185	1
Cluster 1678	1506575	0	Not_differential	Mucci_1506575	1
Cluster 1679	1533561	0	Not_differential	Mucci_1533561	1
Cluster 1682	1446850	0	Not_differential	Mucci_1446850	1
Cluster 1684	1543219	2.2757	Yeast	Mucci_1543219	1
Cluster 1685	1543437	0	Not_differential	Mucci_1543437	1
Cluster 1686	1555288	-1.54102	Mycelium	Mucci_1555288	1
Cluster 1687	1555754	0	Not_differential	Mucci_1555754	1
Cluster 1689	1575623	-7.64281	Mycelium	Mucci_1575623	1
Cluster 1690	1594858	-2.07792	Mycelium	Mucci_1594858	1
Cluster 1691	1375585	-2.29465	Mycelium	Mucci_1375585	1
Cluster 1692	1491578	-2.9165	Mycelium	Mucci_1491578	1
Cluster 1693	1497542	-4.95887	Mycelium	Mucci_1497542	1
Cluster 1694	1570917	0	Not_differential	Mucci_1570917	1
Cluster 1696	1434987	4.18312	Yeast	Mucci_1434987	1
Cluster 1697	1473810	-1.45012	Mycelium	Mucci_1473810	1
Cluster 1698	1533661	-1.77208	Mycelium	Mucci_1533661	1
Cluster 1699	1557665	-5.96111	Mycelium	Mucci_1557665	1
Cluster 1700	1585058	-1.91351	Mycelium	Mucci_1585058	1
Cluster 1701	1373776	-5.00655	Mycelium	Mucci_1373776	1
Cluster 1702	1504756	-5.93587	Mycelium	Mucci_1504756	1
Cluster 1703	1540457	0	Not_differential	Mucci_1540457	1
Cluster 1705	1593393	0	Not_differential	Mucci_1593393	1
Cluster 1706	1154965	0	Not_differential	Mucci_1154965	1
Cluster 1710	1479982	3.64706	Yeast	Mucci_1479982	1
Cluster 1711	1511573	1.8672	Yeast	Mucci_1511573	1
Cluster 1712	1348192	-2.44283	Mycelium	Mucci_1348192	1
Cluster 1713	1457102	-3.22943	Mycelium	Mucci_1457102	1
Cluster 1715	1461850	-3.70873	Mycelium	Mucci_1461850	1
Cluster 1716	1473979	2.96059	Yeast	Mucci_1473979	1
Cluster 1717	1528692	-7.93778	Mycelium	Mucci_1528692	1
Cluster 1718	1548886	1.26554	Yeast	Mucci_1548886	1
Cluster 1719	1551605	1.26739	Yeast	Mucci_1551605	1
Cluster 1720	1595586	-6.13145	Mycelium	Mucci_1595586	1
Cluster 1721	1113119	1.08629	Yeast	Mucci_1113119	1
Cluster 1723	1358663	-1.66413	Mycelium	Mucci_1358663	1
Cluster 1726	1491599	1.95303	Yeast	Mucci_1491599	1
Cluster 1727	1491801	0	Not_differential	Mucci_1491801	1
Cluster 1729	1514164	-2.79755	Mycelium	Mucci_1514164	1
Cluster 1730	1516482	-6.18681	Mycelium	Mucci_1516482	1
Cluster 1733	1320314	-3.85891	Mycelium	Mucci_1320314	1
Cluster 1734	1496991	6.10277	Yeast	Mucci_1496991	1
Cluster 1736	1585445	0	Not_differential	Mucci_1585445	1
Cluster 1738	1433155	7.21882	Yeast	Mucci_1433155	1
Cluster 1740	1513577	3.82365	Yeast	Mucci_1513577	1
Cluster 1741	1528698	-2.08269	Mycelium	Mucci_1528698	1
Cluster 1743	1600237	-3.01164	Mycelium	Mucci_1600237	1
Cluster 1744	1483341	0	Not_differential	Mucci_1483341	1
Cluster 1745	1495578	0	Not_differential	Mucci_1495578	1
Cluster 1746	1525042	-3.66044	Mycelium	Mucci_1525042	1
Cluster 1747	1079491	-10.0511	Mycelium	Mucci_1079491	1
Cluster 1748	1491404	1.52209	Yeast	Mucci_1491404	1
Cluster 1749	1539543	1.03996	Yeast	Mucci_1539543	1
Cluster 1751	1453515	-5.4231	Mycelium	Mucci_1453515	1
Cluster 1752	1486070	0	Not_differential	Mucci_1486070	1
Cluster 1753	1493623	1.37483	Yeast	Mucci_1493623	1
Cluster 1754	1505709	0	Not_differential	Mucci_1505709	1
Cluster 1756	1555823	0	Not_differential	Mucci_1555823	1
Cluster 1757	1392095	3.44094	Yeast	Mucci_1392095	1
Cluster 1758	1535006	0	Not_differential	Mucci_1535006	1
Cluster 1760	1366471	1.08727	Yeast	Mucci_1366471	1
Cluster 1761	1528110	0	Not_differential	Mucci_1528110	1
Cluster 1762	1596438	-7.7838	Mycelium	Mucci_1596438	1
Cluster 1763	1354449	1.11944	Yeast	Mucci_1354449	1
Cluster 1764	1407617	1.13661	Yeast	Mucci_1407617	1
Cluster 1765	1522612	0	Not_differential	Mucci_1522612	1
Cluster 1766	1544154	-1.03642	Mycelium	Mucci_1544154	1
Cluster 1767	1568076	-4.4263	Mycelium	Mucci_1568076	1
Cluster 1769	1385235	-2.36034	Mycelium	Mucci_1385235	1
Cluster 1770	1456642	-2.27444	Mycelium	Mucci_1456642	1
Cluster 1773	1525127	-5.8537	Mycelium	Mucci_1525127	1
Cluster 1774	1534235	1.16887	Yeast	Mucci_1534235	1
Cluster 1776	1474143	0	Not_differential	Mucci_1474143	1
Cluster 1777	1549305	-2.63104	Mycelium	Mucci_1549305	1
Cluster 1778	1325012	-6.65241	Mycelium	Mucci_1325012	1
Cluster 1779	1361949	-1.57575	Mycelium	Mucci_1361949	1
Cluster 1780	1364873	-2.43677	Mycelium	Mucci_1364873	1
Cluster 1781	1468995	0	Not_differential	Mucci_1468995	1
Cluster 1782	1483141	-1.30183	Mycelium	Mucci_1483141	1
Cluster 1783	1513652	1.93625	Yeast	Mucci_1513652	1
Cluster 1784	1539565	2.35055	Yeast	Mucci_1539565	1
Cluster 1785	1552781	0	Not_differential	Mucci_1552781	1
Cluster 1786	1582312	-7.01118	Mycelium	Mucci_1582312	1
Cluster 1788	1433443	-7.65185	Mycelium	Mucci_1433443	1
Cluster 1789	1457696	0	Not_differential	Mucci_1457696	1
Cluster 1790	1459175	0	Not_differential	Mucci_1459175	1
Cluster 1791	1509872	0	Not_differential	Mucci_1509872	1
Cluster 1792	1479505	1.20066	Yeast	Mucci_1479505	1
Cluster 1793	1491730	2.75945	Yeast	Mucci_1491730	1
Cluster 1794	1498659	5.36767	Yeast	Mucci_1498659	1
Cluster 1795	1373480	-4.62476	Mycelium	Mucci_1373480	1
Cluster 1796	1551667	0	Not_differential	Mucci_1551667	1
Cluster 1797	1389923	-5.61379	Mycelium	Mucci_1389923	1
Cluster 1798	1453250	2.92674	Yeast	Mucci_1453250	1
Cluster 1799	1455318	-3.21944	Mycelium	Mucci_1455318	1
Cluster 1800	1322923	-1.41851	Mycelium	Mucci_1322923	1
Cluster 1801	1435913	0	Not_differential	Mucci_1435913	1
Cluster 1802	1457743	-1.17754	Mycelium	Mucci_1457743	1
Cluster 1803	1483805	1.20855	Yeast	Mucci_1483805	1
Cluster 1804	1524946	0	Not_differential	Mucci_1524946	1
Cluster 1805	1553583	-4.08321	Mycelium	Mucci_1553583	1
Cluster 1808	1543223	3.68769	Yeast	Mucci_1543223	1
Cluster 1809	1435031	-4.48184	Mycelium	Mucci_1435031	1
Cluster 1810	1534095	0	Not_differential	Mucci_1534095	1
Cluster 1811	1542350	-2.22741	Mycelium	Mucci_1542350	1
Cluster 1812	1553865	-1.42673	Mycelium	Mucci_1553865	1
Cluster 1813	1466382	-8.14877	Mycelium	Mucci_1466382	1
Cluster 1814	1510146	1.58434	Yeast	Mucci_1510146	1
Cluster 1815	1541087	-1.3013	Mycelium	Mucci_1541087	1
Cluster 1816	1350552	-4.07105	Mycelium	Mucci_1350552	1
Cluster 1817	1365027	-4.11509	Mycelium	Mucci_1365027	1
Cluster 1818	1389636	-4.11769	Mycelium	Mucci_1389636	1
Cluster 1819	1468170	-6.13745	Mycelium	Mucci_1468170	1
Cluster 1820	1532428	1.33587	Yeast	Mucci_1532428	1
Cluster 1821	1544003	-1.71202	Mycelium	Mucci_1544003	1
Cluster 1822	1557113	-1.02244	Mycelium	Mucci_1557113	1
Cluster 1823	1599537	2.26817	Yeast	Mucci_1599537	1
Cluster 1824	1468427	0	Not_differential	Mucci_1468427	1
Cluster 1825	1487132	0	Not_differential	Mucci_1487132	1
Cluster 1826	1491617	4.80474	Yeast	Mucci_1491617	1
Cluster 1827	1508382	-7.55428	Mycelium	Mucci_1508382	1
Cluster 1830	1528179	0	Not_differential	Mucci_1528179	1
Cluster 1831	1534694	1.24719	Yeast	Mucci_1534694	1
Cluster 1833	1557007	0	Not_differential	Mucci_1557007	1
Cluster 1834	1593326	-1.55436	Mycelium	Mucci_1593326	1
Cluster 1835	1371914	-3.60099	Mycelium	Mucci_1371914	1
Cluster 1836	1386076	-1.05205	Mycelium	Mucci_1386076	1
Cluster 1837	1497566	-3.52226	Mycelium	Mucci_1497566	1
Cluster 1838	1542132	0	Not_differential	Mucci_1542132	1
Cluster 1840	1545806	-2.19352	Mycelium	Mucci_1545806	1
Cluster 1841	1549930	1.97755	Yeast	Mucci_1549930	1
Cluster 1842	1551896	2.44985	Yeast	Mucci_1551896	1
Cluster 1843	1593170	0	Not_differential	Mucci_1593170	1
Cluster 1844	1338466	1.87363	Yeast	Mucci_1338466	1
Cluster 1846	1443321	-4.52706	Mycelium	Mucci_1443321	1
Cluster 1848	1480453	1.25581	Yeast	Mucci_1480453	1
Cluster 1850	1534483	3.17007	Yeast	Mucci_1534483	1
Cluster 1851	1582517	-3.43989	Mycelium	Mucci_1582517	1
Cluster 1852	1597341	-7.73112	Mycelium	Mucci_1597341	1
Cluster 1853	1360545	1.31482	Yeast	Mucci_1360545	1
Cluster 1854	1464414	-1.11652	Mycelium	Mucci_1464414	1
Cluster 1855	1476131	-5.16288	Mycelium	Mucci_1476131	1
Cluster 1856	1502470	1.67219	Yeast	Mucci_1502470	1
Cluster 1857	1529873	-4.95033	Mycelium	Mucci_1529873	1
Cluster 1858	1557467	-3.91951	Mycelium	Mucci_1557467	1
Cluster 1859	1557646	-5.84095	Mycelium	Mucci_1557646	1
Cluster 1860	1561808	2.28278	Yeast	Mucci_1561808	1
Cluster 1861	1455558	5.12307	Yeast	Mucci_1455558	1
Cluster 1862	1492295	1.50791	Yeast	Mucci_1492295	1
Cluster 1863	1518325	-1.721	Mycelium	Mucci_1518325	1
Cluster 1864	1538344	0	Not_differential	Mucci_1538344	1
Cluster 1865	1543715	0	Not_differential	Mucci_1543715	1
Cluster 1867	1556840	1.64296	Yeast	Mucci_1556840	1
Cluster 1868	1557448	-2.97963	Mycelium	Mucci_1557448	1
Cluster 1869	1383246	-5.38187	Mycelium	Mucci_1383246	1
Cluster 1870	1455193	-4.97798	Mycelium	Mucci_1455193	1
Cluster 1871	1484983	-1.8899	Mycelium	Mucci_1484983	1
Cluster 1872	1490392	-3.62585	Mycelium	Mucci_1490392	1
Cluster 1873	1507946	3.5541	Yeast	Mucci_1507946	1
Cluster 1874	1530915	-4.18985	Mycelium	Mucci_1530915	1
Cluster 1875	1391253	-1.45282	Mycelium	Mucci_1391253	1
Cluster 1876	1449220	-2.77888	Mycelium	Mucci_1449220	1
Cluster 1877	1525221	-1.44033	Mycelium	Mucci_1525221	1
Cluster 1880	1601116	-1.6471	Mycelium	Mucci_1601116	1
Cluster 1882	1511510	1.45651	Yeast	Mucci_1511510	1
Cluster 1883	1514403	-1.14118	Mycelium	Mucci_1514403	1
Cluster 1884	1323894	1.60831	Yeast	Mucci_1323894	1
Cluster 1885	1389512	2.58228	Yeast	Mucci_1389512	1
Cluster 1886	1471700	0	Not_differential	Mucci_1471700	1
Cluster 1889	1594373	-3.27166	Mycelium	Mucci_1594373	1
Cluster 1890	1360869	0	Not_differential	Mucci_1360869	1
Cluster 1891	1487804	-6.76167	Mycelium	Mucci_1487804	1
Cluster 1892	1521801	3.56613	Yeast	Mucci_1521801	1
Cluster 1893	1550960	0	Not_differential	Mucci_1550960	1
Cluster 1894	1554112	-1.95314	Mycelium	Mucci_1554112	1
Cluster 1895	1376571	-7.09837	Mycelium	Mucci_1376571	1
Cluster 1896	1442415	0	Not_differential	Mucci_1442415	1
Cluster 1897	1465714	2.31843	Yeast	Mucci_1465714	1
Cluster 1898	1529208	0	Not_differential	Mucci_1529208	1
Cluster 1899	1596286	-3.00835	Mycelium	Mucci_1596286	1
Cluster 1901	1326496	0	Not_differential	Mucci_1326496	1
Cluster 1902	1511602	2.56597	Yeast	Mucci_1511602	1
Cluster 1904	1367199	-7.58524	Mycelium	Mucci_1367199	1
Cluster 1905	1482707	-10.9411	Mycelium	Mucci_1482707	1
Cluster 1906	1498345	-1.118	Mycelium	Mucci_1498345	1
Cluster 1907	1556540	-1.95703	Mycelium	Mucci_1556540	1
Cluster 1909	1446491	-1.04944	Mycelium	Mucci_1446491	1
Cluster 1910	1461671	-2.05843	Mycelium	Mucci_1461671	1
Cluster 1911	1473635	-1.46613	Mycelium	Mucci_1473635	1
Cluster 1912	1346383	-4.6968	Mycelium	Mucci_1346383	1
Cluster 1913	1375653	2.318	Yeast	Mucci_1375653	1
Cluster 1915	1479794	-2.513	Mycelium	Mucci_1479794	1
Cluster 1916	1489450	-1.2574	Mycelium	Mucci_1489450	1
Cluster 1917	1513688	1.19435	Yeast	Mucci_1513688	1
Cluster 1918	1527603	0	Not_differential	Mucci_1527603	1
Cluster 1920	1321045	1.88621	Yeast	Mucci_1321045	1
Cluster 1921	1365382	-7.31786	Mycelium	Mucci_1365382	1
Cluster 1922	1492904	3.24437	Yeast	Mucci_1492904	1
Cluster 1923	1536150	-3.29792	Mycelium	Mucci_1536150	1
Cluster 1924	1369271	0	Not_differential	Mucci_1369271	1
Cluster 1926	1453663	-2.61544	Mycelium	Mucci_1453663	1
Cluster 1927	1376320	0	Not_differential	Mucci_1376320	1
Cluster 1928	1455336	2.71779	Yeast	Mucci_1455336	1
Cluster 1929	1503830	2.73449	Yeast	Mucci_1503830	1
Cluster 1930	1530760	0	Not_differential	Mucci_1530760	1
Cluster 1931	1547199	1.77148	Yeast	Mucci_1547199	1
Cluster 1932	1548540	-9.34551	Mycelium	Mucci_1548540	1
Cluster 1933	1566976	2.59158	Yeast	Mucci_1566976	1
Cluster 1934	1344959	1.77886	Yeast	Mucci_1344959	1
Cluster 1936	1386293	1.51056	Yeast	Mucci_1386293	1
Cluster 1937	1443812	-2.12193	Mycelium	Mucci_1443812	1
Cluster 1938	1459280	-2.38595	Mycelium	Mucci_1459280	1
Cluster 1939	1464525	0	Not_differential	Mucci_1464525	1
Cluster 1940	1496950	1.71691	Yeast	Mucci_1496950	1
Cluster 1941	1507697	-2.2383	Mycelium	Mucci_1507697	1
Cluster 1942	1527938	1.4478	Yeast	Mucci_1527938	1
Cluster 1943	1018691	-5.79948	Mycelium	Mucci_1018691	1
Cluster 1944	1467759	-1.27224	Mycelium	Mucci_1467759	1
Cluster 1945	1488735	0	Not_differential	Mucci_1488735	1
Cluster 1946	1498497	-1.00286	Mycelium	Mucci_1498497	1
Cluster 1948	1537713	-4.43495	Mycelium	Mucci_1537713	1
Cluster 1951	1361258	-5.99987	Mycelium	Mucci_1361258	1
Cluster 1952	1511012	0	Not_differential	Mucci_1511012	1
Cluster 1954	1456647	0	Not_differential	Mucci_1456647	1
Cluster 1955	1460076	0	Not_differential	Mucci_1460076	1
Cluster 1956	1509587	-2.20231	Mycelium	Mucci_1509587	1
Cluster 1957	1509686	1.63844	Yeast	Mucci_1509686	1
Cluster 1958	1534741	-2.26963	Mycelium	Mucci_1534741	1
Cluster 1959	1537932	0	Not_differential	Mucci_1537932	1
Cluster 1960	1566897	-1.43703	Mycelium	Mucci_1566897	1
Cluster 1961	1599721	1.7637	Yeast	Mucci_1599721	1
Cluster 1962	1413485	-4.63153	Mycelium	Mucci_1413485	1
Cluster 1964	1346017	0	Not_differential	Mucci_1346017	1
Cluster 1965	1376997	0	Not_differential	Mucci_1376997	1
Cluster 1966	1497897	3.73806	Yeast	Mucci_1497897	1
Cluster 1968	1518758	-4.48896	Mycelium	Mucci_1518758	1
Cluster 1969	1583212	-4.0142	Mycelium	Mucci_1583212	1
Cluster 1970	1441267	0	Not_differential	Mucci_1441267	1
Cluster 1971	1469359	-1.63576	Mycelium	Mucci_1469359	1
Cluster 1972	1499283	2.35368	Yeast	Mucci_1499283	1
Cluster 1973	1503459	-1.84922	Mycelium	Mucci_1503459	1
Cluster 1974	1552420	-3.22836	Mycelium	Mucci_1552420	1
Cluster 1975	1534908	1.71733	Yeast	Mucci_1534908	1
Cluster 1976	1571774	-1.07869	Mycelium	Mucci_1571774	1
Cluster 1977	1599801	2.29401	Yeast	Mucci_1599801	1
Cluster 1978	1359486	-1.23571	Mycelium	Mucci_1359486	1
Cluster 1979	1461074	0	Not_differential	Mucci_1461074	1
Cluster 1980	1500319	1.35981	Yeast	Mucci_1500319	1
Cluster 1981	1518022	0	Not_differential	Mucci_1518022	1
Cluster 1982	1530244	-5.99143	Mycelium	Mucci_1530244	1
Cluster 1983	1553234	-1.41172	Mycelium	Mucci_1553234	1
Cluster 1984	1323035	-5.98425	Mycelium	Mucci_1323035	1
Cluster 1985	1357493	-3.88227	Mycelium	Mucci_1357493	1
Cluster 1987	1512912	1.71267	Yeast	Mucci_1512912	1
Cluster 1988	1543329	2.52001	Yeast	Mucci_1543329	1
Cluster 1989	1566189	0	Not_differential	Mucci_1566189	1
Cluster 1990	1598150	0	Not_differential	Mucci_1598150	1
Cluster 1991	1495974	0	Not_differential	Mucci_1495974	1
Cluster 1992	1516997	-6.76483	Mycelium	Mucci_1516997	1
Cluster 1993	1493281	0	Not_differential	Mucci_1493281	1
Cluster 1994	1500487	-1.00817	Mycelium	Mucci_1500487	1
Cluster 1998	1467309	-2.61018	Mycelium	Mucci_1467309	1
Cluster 1999	1476805	7.79687	Yeast	Mucci_1476805	1
Cluster 2000	1486915	-3.09601	Mycelium	Mucci_1486915	1
Cluster 2001	1513052	0	Not_differential	Mucci_1513052	1
Cluster 2005	1349083	-3.09075	Mycelium	Mucci_1349083	1
Cluster 2006	1373874	0	Not_differential	Mucci_1373874	1
Cluster 2007	1472916	0	Not_differential	Mucci_1472916	1
Cluster 2009	1532530	0	Not_differential	Mucci_1532530	1
Cluster 2010	1540617	0	Not_differential	Mucci_1540617	1
Cluster 2012	1338322	1.09337	Yeast	Mucci_1338322	1
Cluster 2013	1381556	-7.1304	Mycelium	Mucci_1381556	1
Cluster 2014	1442139	1.96311	Yeast	Mucci_1442139	1
Cluster 2015	1509623	-1.88675	Mycelium	Mucci_1509623	1
Cluster 2017	1479854	-2.10291	Mycelium	Mucci_1479854	1
Cluster 2018	1515854	-2.58935	Mycelium	Mucci_1515854	1
Cluster 2019	1541311	1.97121	Yeast	Mucci_1541311	1
Cluster 2020	1547275	-8.24344	Mycelium	Mucci_1547275	1
Cluster 2022	1591179	-7.87929	Mycelium	Mucci_1591179	1
Cluster 2023	1130421	0	Not_differential	Mucci_1130421	1
Cluster 2024	1471831	-8.43318	Mycelium	Mucci_1471831	1
Cluster 2026	1507205	2.6214	Yeast	Mucci_1507205	1
Cluster 2028	1444115	0	Not_differential	Mucci_1444115	1
Cluster 2029	1463924	-9.07921	Mycelium	Mucci_1463924	1
Cluster 2030	1491743	0	Not_differential	Mucci_1491743	1
Cluster 2032	1503108	0	Not_differential	Mucci_1503108	1
Cluster 2033	1526430	1.61346	Yeast	Mucci_1526430	1
Cluster 2035	1336652	1.3663	Yeast	Mucci_1336652	1
Cluster 2036	1394233	-2.54683	Mycelium	Mucci_1394233	1
Cluster 2037	1456489	-1.40405	Mycelium	Mucci_1456489	1
Cluster 2038	1473832	1.69208	Yeast	Mucci_1473832	1
Cluster 2039	1515977	-6.2959	Mycelium	Mucci_1515977	1
Cluster 2040	1527441	-1.23263	Mycelium	Mucci_1527441	1
Cluster 2041	1531752	-2.1649	Mycelium	Mucci_1531752	1
Cluster 2042	1385707	0	Not_differential	Mucci_1385707	1
Cluster 2043	1442255	2.64033	Yeast	Mucci_1442255	1
Cluster 2044	1460410	1.27782	Yeast	Mucci_1460410	1
Cluster 2045	1475445	-1.64842	Mycelium	Mucci_1475445	1
Cluster 2046	1502989	-2.1261	Mycelium	Mucci_1502989	1
Cluster 2047	1512522	-1.861	Mycelium	Mucci_1512522	1
Cluster 2048	1519092	2.5135	Yeast	Mucci_1519092	1
Cluster 2049	1526154	-8.79651	Mycelium	Mucci_1526154	1
Cluster 2050	1446075	-3.04123	Mycelium	Mucci_1446075	1
Cluster 2051	1448553	0	Not_differential	Mucci_1448553	1
Cluster 2052	1500586	-3.52547	Mycelium	Mucci_1500586	1
Cluster 2053	1504786	-1.54004	Mycelium	Mucci_1504786	1
Cluster 2054	1526128	0	Not_differential	Mucci_1526128	1
Cluster 2055	1584148	-3.57444	Mycelium	Mucci_1584148	1
Cluster 2056	1584571	2.03716	Yeast	Mucci_1584571	1
Cluster 2057	1472659	-1.99492	Mycelium	Mucci_1472659	1
Cluster 2058	1498959	2.09512	Yeast	Mucci_1498959	1
Cluster 2059	1520864	-1.64296	Mycelium	Mucci_1520864	1
Cluster 2062	1391247	-2.00219	Mycelium	Mucci_1391247	1
Cluster 2063	1473476	4.87603	Yeast	Mucci_1473476	1
Cluster 2064	1483595	0	Not_differential	Mucci_1483595	1
Cluster 2066	1529885	0	Not_differential	Mucci_1529885	1
Cluster 2067	1550048	0	Not_differential	Mucci_1550048	1
Cluster 2070	1455312	-1.72109	Mycelium	Mucci_1455312	1
Cluster 2071	1459227	3.00353	Yeast	Mucci_1459227	1
Cluster 2072	1492917	0	Not_differential	Mucci_1492917	1
Cluster 2073	1506251	0	Not_differential	Mucci_1506251	1
Cluster 2074	1528032	-1.89464	Mycelium	Mucci_1528032	1
Cluster 2075	1528476	-5.12181	Mycelium	Mucci_1528476	1
Cluster 2076	1550833	1.73343	Yeast	Mucci_1550833	1
Cluster 2077	1577904	-1.28871	Mycelium	Mucci_1577904	1
Cluster 2078	1021363	0	Not_differential	Mucci_1021363	1
Cluster 2079	1102279	0	Not_differential	Mucci_1102279	1
Cluster 2080	1349346	2.83066	Yeast	Mucci_1349346	1
Cluster 2081	1356829	0	Not_differential	Mucci_1356829	1
Cluster 2082	1386373	0	Not_differential	Mucci_1386373	1
Cluster 2083	1460757	-6.91249	Mycelium	Mucci_1460757	1
Cluster 2084	1508412	2.32561	Yeast	Mucci_1508412	1
Cluster 2085	1483235	-2.52126	Mycelium	Mucci_1483235	1
Cluster 2086	1494617	-1.06799	Mycelium	Mucci_1494617	1
Cluster 2088	1587640	-2.10619	Mycelium	Mucci_1587640	1
Cluster 2089	1591101	0	Not_differential	Mucci_1591101	1
Cluster 2090	1599753	1.92638	Yeast	Mucci_1599753	1
Cluster 2091	1326411	-1.17478	Mycelium	Mucci_1326411	1
Cluster 2093	1472498	1.15739	Yeast	Mucci_1472498	1
Cluster 2094	1478780	0	Not_differential	Mucci_1478780	1
Cluster 2095	1554857	-8.21757	Mycelium	Mucci_1554857	1
Cluster 2096	1365813	1.73913	Yeast	Mucci_1365813	1
Cluster 2097	1474926	-10.4218	Mycelium	Mucci_1474926	1
Cluster 2098	1480460	0	Not_differential	Mucci_1480460	1
Cluster 2099	1484321	3.30376	Yeast	Mucci_1484321	1
Cluster 2100	1523036	-1.46296	Mycelium	Mucci_1523036	1
Cluster 2101	1572013	0	Not_differential	Mucci_1572013	1
Cluster 2102	1368475	-4.62995	Mycelium	Mucci_1368475	1
Cluster 2103	1381853	0	Not_differential	Mucci_1381853	1
Cluster 2104	1466346	0	Not_differential	Mucci_1466346	1
Cluster 2105	1521047	-2.01002	Mycelium	Mucci_1521047	1
Cluster 2106	1526230	-1.00084	Mycelium	Mucci_1526230	1
Cluster 2107	1548630	1.25944	Yeast	Mucci_1548630	1
Cluster 2110	1482583	0	Not_differential	Mucci_1482583	1
Cluster 2112	1497406	2.28894	Yeast	Mucci_1497406	1
Cluster 2113	1514408	-1.08158	Mycelium	Mucci_1514408	1
Cluster 2114	1548906	1.84181	Yeast	Mucci_1548906	1
Cluster 2115	1561442	-6.60407	Mycelium	Mucci_1561442	1
Cluster 2118	1461672	-4.21007	Mycelium	Mucci_1461672	1
Cluster 2119	1469013	4.81718	Yeast	Mucci_1469013	1
Cluster 2120	1475999	2.11433	Yeast	Mucci_1475999	1
Cluster 2121	1480634	-3.51451	Mycelium	Mucci_1480634	1
Cluster 2122	1361624	0	Not_differential	Mucci_1361624	1
Cluster 2123	1395033	0	Not_differential	Mucci_1395033	1
Cluster 2124	1497586	0	Not_differential	Mucci_1497586	1
Cluster 2125	1520585	0	Not_differential	Mucci_1520585	1
Cluster 2127	1389450	-1.16908	Mycelium	Mucci_1389450	1
Cluster 2128	1457019	0	Not_differential	Mucci_1457019	1
Cluster 2129	1486266	-2.48136	Mycelium	Mucci_1486266	1
Cluster 2130	1489723	-4.22807	Mycelium	Mucci_1489723	1
Cluster 2131	1510371	-3.8643	Mycelium	Mucci_1510371	1
Cluster 2132	1516660	0	Not_differential	Mucci_1516660	1
Cluster 2133	1550236	-1.88459	Mycelium	Mucci_1550236	1
Cluster 2134	1600877	0	Not_differential	Mucci_1600877	1
Cluster 2136	1481053	-2.02028	Mycelium	Mucci_1481053	1
Cluster 2137	1539587	7.26107	Yeast	Mucci_1539587	1
Cluster 2138	1595692	0	Not_differential	Mucci_1595692	1
Cluster 2139	1347010	-5.56355	Mycelium	Mucci_1347010	1
Cluster 2140	1503780	-4.44635	Mycelium	Mucci_1503780	1
Cluster 2141	1528940	3.05253	Yeast	Mucci_1528940	1
Cluster 2142	1444358	-7.20687	Mycelium	Mucci_1444358	1
Cluster 2144	1468674	3.75835	Yeast	Mucci_1468674	1
Cluster 2145	1471963	-4.01478	Mycelium	Mucci_1471963	1
Cluster 2146	1482424	0	Not_differential	Mucci_1482424	1
Cluster 2147	1498542	-1.36016	Mycelium	Mucci_1498542	1
Cluster 2148	1514346	1.72659	Yeast	Mucci_1514346	1
Cluster 2149	1537172	1.62511	Yeast	Mucci_1537172	1
Cluster 2151	1546606	-1.26725	Mycelium	Mucci_1546606	1
Cluster 2152	1521990	-6.76194	Mycelium	Mucci_1521990	1
Cluster 2153	1527940	-4.20165	Mycelium	Mucci_1527940	1
Cluster 2154	1535487	0	Not_differential	Mucci_1535487	1
Cluster 2155	1541429	-1.27212	Mycelium	Mucci_1541429	1
Cluster 2156	1549635	0	Not_differential	Mucci_1549635	1
Cluster 2157	1592666	-5.7145	Mycelium	Mucci_1592666	1
Cluster 2159	1453576	-3.44374	Mycelium	Mucci_1453576	1
Cluster 2160	1470274	0	Not_differential	Mucci_1470274	1
Cluster 2161	1496098	0	Not_differential	Mucci_1496098	1
Cluster 2162	1525833	1.68157	Yeast	Mucci_1525833	1
Cluster 2163	1542693	2.15632	Yeast	Mucci_1542693	1
Cluster 2164	1382021	-1.24698	Mycelium	Mucci_1382021	1
Cluster 2165	1479808	0	Not_differential	Mucci_1479808	1
Cluster 2166	1483414	-2.10317	Mycelium	Mucci_1483414	1
Cluster 2167	1488681	3.33321	Yeast	Mucci_1488681	1
Cluster 2168	1520506	0	Not_differential	Mucci_1520506	1
Cluster 2170	1551958	-2.14246	Mycelium	Mucci_1551958	1
Cluster 2171	1555880	0	Not_differential	Mucci_1555880	1
Cluster 2175	1483452	1.30885	Yeast	Mucci_1483452	1
Cluster 2176	1500668	0	Not_differential	Mucci_1500668	1
Cluster 2177	1540993	1.84091	Yeast	Mucci_1540993	1
Cluster 2178	1550301	1.86935	Yeast	Mucci_1550301	1
Cluster 2179	1597032	-2.58163	Mycelium	Mucci_1597032	1
Cluster 2180	1464175	1.12575	Yeast	Mucci_1464175	1
Cluster 2181	1473055	3.18979	Yeast	Mucci_1473055	1
Cluster 2184	1501522	-1.25656	Mycelium	Mucci_1501522	1
Cluster 2185	1537805	1.21445	Yeast	Mucci_1537805	1
Cluster 2186	1553903	3.69869	Yeast	Mucci_1553903	1
Cluster 2188	1029479	-3.9078	Mycelium	Mucci_1029479	1
Cluster 2189	1395443	0	Not_differential	Mucci_1395443	1
Cluster 2190	1482274	-8.11064	Mycelium	Mucci_1482274	1
Cluster 2191	1494550	0	Not_differential	Mucci_1494550	1
Cluster 2192	1515926	-12.3825	Mycelium	Mucci_1515926	1
Cluster 2195	1553630	-1.68717	Mycelium	Mucci_1553630	1
Cluster 2196	1593046	1.23758	Yeast	Mucci_1593046	1
Cluster 2198	1502260	2.90879	Yeast	Mucci_1502260	1
Cluster 2199	1509401	-3.44346	Mycelium	Mucci_1509401	1
Cluster 2200	1579623	-3.47638	Mycelium	Mucci_1579623	1
Cluster 2201	1354749	1.27038	Yeast	Mucci_1354749	1
Cluster 2202	1360061	-3.49179	Mycelium	Mucci_1360061	1
Cluster 2203	1455506	0	Not_differential	Mucci_1455506	1
Cluster 2204	1479477	0	Not_differential	Mucci_1479477	1
Cluster 2205	1518300	-1.18641	Mycelium	Mucci_1518300	1
Cluster 2206	1543176	-1.69461	Mycelium	Mucci_1543176	1
Cluster 2207	1036243	0	Not_differential	Mucci_1036243	1
Cluster 2208	1070820	1.57804	Yeast	Mucci_1070820	1
Cluster 2209	1369036	1.00376	Yeast	Mucci_1369036	1
Cluster 2212	1473869	4.44354	Yeast	Mucci_1473869	1
Cluster 2213	1534150	-4.78984	Mycelium	Mucci_1534150	1
Cluster 2214	1555171	1.49731	Yeast	Mucci_1555171	1
Cluster 2215	1474022	0	Not_differential	Mucci_1474022	1
Cluster 2216	1508679	1.1125	Yeast	Mucci_1508679	1
Cluster 2218	1551944	1.63176	Yeast	Mucci_1551944	1
Cluster 2220	1575150	-8.35641	Mycelium	Mucci_1575150	1
Cluster 2221	1346588	1.58395	Yeast	Mucci_1346588	1
Cluster 2222	1363237	-2.65156	Mycelium	Mucci_1363237	1
Cluster 2223	1492344	2.07577	Yeast	Mucci_1492344	1
Cluster 2224	1509316	-1.03098	Mycelium	Mucci_1509316	1
Cluster 2225	1510151	0	Not_differential	Mucci_1510151	1
Cluster 2226	1526584	-3.26864	Mycelium	Mucci_1526584	1
Cluster 2227	1601469	-4.03057	Mycelium	Mucci_1601469	1
Cluster 2228	1351582	-2.53695	Mycelium	Mucci_1351582	1
Cluster 2229	1448947	1.535	Yeast	Mucci_1448947	1
Cluster 2230	1479648	0	Not_differential	Mucci_1479648	1
Cluster 2233	1527232	0	Not_differential	Mucci_1527232	1
Cluster 2234	1565846	0	Not_differential	Mucci_1565846	1
Cluster 2235	1573109	0	Not_differential	Mucci_1573109	1
Cluster 2236	1595125	-2.06702	Mycelium	Mucci_1595125	1
Cluster 2237	1596305	-2.9487	Mycelium	Mucci_1596305	1
Cluster 2239	1148843	-3.52472	Mycelium	Mucci_1148843	1
Cluster 2240	1499436	0	Not_differential	Mucci_1499436	1
Cluster 2241	1534495	2.72417	Yeast	Mucci_1534495	1
Cluster 2243	1542523	-4.38397	Mycelium	Mucci_1542523	1
Cluster 2244	1550320	2.74215	Yeast	Mucci_1550320	1
Cluster 2245	1593578	-8.00173	Mycelium	Mucci_1593578	1
Cluster 2246	1599050	1.71359	Yeast	Mucci_1599050	1
Cluster 2247	1474872	3.63811	Yeast	Mucci_1474872	1
Cluster 2249	1489285	1.31045	Yeast	Mucci_1489285	1
Cluster 2252	1461625	-2.93761	Mycelium	Mucci_1461625	1
Cluster 2253	1469585	0	Not_differential	Mucci_1469585	1
Cluster 2254	1470203	3.35745	Yeast	Mucci_1470203	1
Cluster 2255	1504990	-1.91002	Mycelium	Mucci_1504990	1
Cluster 2256	1517004	-6.56469	Mycelium	Mucci_1517004	1
Cluster 2258	1534662	-1.20363	Mycelium	Mucci_1534662	1
Cluster 2259	1584919	-4.87373	Mycelium	Mucci_1584919	1
Cluster 2260	1590806	0	Not_differential	Mucci_1590806	1
Cluster 2261	1595607	0	Not_differential	Mucci_1595607	1
Cluster 2262	1388684	-8.04589	Mycelium	Mucci_1388684	1
Cluster 2263	1462606	-2.32367	Mycelium	Mucci_1462606	1
Cluster 2264	1478924	0	Not_differential	Mucci_1478924	1
Cluster 2265	1499225	-1.00089	Mycelium	Mucci_1499225	1
Cluster 2266	1502021	-1.71234	Mycelium	Mucci_1502021	1
Cluster 2267	1510043	-2.66014	Mycelium	Mucci_1510043	1
Cluster 2268	1514720	0	Not_differential	Mucci_1514720	1
Cluster 2269	1529859	2.52648	Yeast	Mucci_1529859	1
Cluster 2270	1534919	-1.18603	Mycelium	Mucci_1534919	1
Cluster 2271	1562600	-4.13983	Mycelium	Mucci_1562600	1
Cluster 2272	1599666	-5.83616	Mycelium	Mucci_1599666	1
Cluster 2273	1599863	0	Not_differential	Mucci_1599863	1
Cluster 2274	1474672	-5.39507	Mycelium	Mucci_1474672	1
Cluster 2275	1516356	0	Not_differential	Mucci_1516356	1
Cluster 2277	1537036	-2.88381	Mycelium	Mucci_1537036	1
Cluster 2278	1343354	1.41181	Yeast	Mucci_1343354	1
Cluster 2279	1453634	-5.57892	Mycelium	Mucci_1453634	1
Cluster 2280	1459750	0	Not_differential	Mucci_1459750	1
Cluster 2281	1475598	1.32501	Yeast	Mucci_1475598	1
Cluster 2282	1479485	0	Not_differential	Mucci_1479485	1
Cluster 2283	1495306	2.36229	Yeast	Mucci_1495306	1
Cluster 2284	1523279	0	Not_differential	Mucci_1523279	1
Cluster 2285	1533225	0	Not_differential	Mucci_1533225	1
Cluster 2286	1588502	-8.1089	Mycelium	Mucci_1588502	1
Cluster 2287	1601206	0	Not_differential	Mucci_1601206	1
Cluster 2289	1369598	-1.11334	Mycelium	Mucci_1369598	1
Cluster 2290	1372246	0	Not_differential	Mucci_1372246	1
Cluster 2292	1493384	1.22429	Yeast	Mucci_1493384	1
Cluster 2293	1510203	0	Not_differential	Mucci_1510203	1
Cluster 2295	1328410	0	Not_differential	Mucci_1328410	1
Cluster 2297	1486885	-1.25521	Mycelium	Mucci_1486885	1
Cluster 2298	1493690	2.02256	Yeast	Mucci_1493690	1
Cluster 2299	1495154	-1.76545	Mycelium	Mucci_1495154	1
Cluster 2300	1584410	0	Not_differential	Mucci_1584410	1
Cluster 2301	1351740	-3.01574	Mycelium	Mucci_1351740	1
Cluster 2302	1479643	-6.90858	Mycelium	Mucci_1479643	1
Cluster 2303	1507117	0	Not_differential	Mucci_1507117	1
Cluster 2304	1551235	0	Not_differential	Mucci_1551235	1
Cluster 2305	1597266	-2.10239	Mycelium	Mucci_1597266	1
Cluster 2306	1458615	-1.09536	Mycelium	Mucci_1458615	1
Cluster 2308	1488876	-1.0958	Mycelium	Mucci_1488876	1
Cluster 2310	1525119	-1.60312	Mycelium	Mucci_1525119	1
Cluster 2311	1542521	-4.14079	Mycelium	Mucci_1542521	1
Cluster 2313	1496228	3.3498	Yeast	Mucci_1496228	1
Cluster 2315	1500621	0	Not_differential	Mucci_1500621	1
Cluster 2316	1544446	-1.43194	Mycelium	Mucci_1544446	1
Cluster 2317	1461395	-2.86991	Mycelium	Mucci_1461395	1
Cluster 2319	1486525	-3.39026	Mycelium	Mucci_1486525	1
Cluster 2320	1514880	1.38289	Yeast	Mucci_1514880	1
Cluster 2321	1580282	0	Not_differential	Mucci_1580282	1
Cluster 2322	1586608	-8.0432	Mycelium	Mucci_1586608	1
Cluster 2324	1370793	3.37229	Yeast	Mucci_1370793	1
Cluster 2325	1388546	5.88171	Yeast	Mucci_1388546	1
Cluster 2326	1443495	-1.32923	Mycelium	Mucci_1443495	1
Cluster 2327	1465130	1.78578	Yeast	Mucci_1465130	1
Cluster 2331	1457466	-3.75715	Mycelium	Mucci_1457466	1
Cluster 2332	1529472	8.50312	Yeast	Mucci_1529472	1
Cluster 2333	1531515	-2.26577	Mycelium	Mucci_1531515	1
Cluster 2334	1540187	2.40344	Yeast	Mucci_1540187	1
Cluster 2335	1541540	1.53797	Yeast	Mucci_1541540	1
Cluster 2336	1542065	0	Not_differential	Mucci_1542065	1
Cluster 2337	1588845	-3.36593	Mycelium	Mucci_1588845	1
Cluster 2338	1454005	-1.90896	Mycelium	Mucci_1454005	1
Cluster 2341	1480700	-1.78296	Mycelium	Mucci_1480700	1
Cluster 2342	1511317	-9.71661	Mycelium	Mucci_1511317	1
Cluster 2343	1561725	0	Not_differential	Mucci_1561725	1
Cluster 2345	1351860	2.66699	Yeast	Mucci_1351860	1
Cluster 2346	1479994	5.4639	Yeast	Mucci_1479994	1
Cluster 2348	1517218	-2.13474	Mycelium	Mucci_1517218	1
Cluster 2349	1521260	4.51023	Yeast	Mucci_1521260	1
Cluster 2351	1566062	0	Not_differential	Mucci_1566062	1
Cluster 2352	1343873	0	Not_differential	Mucci_1343873	1
Cluster 2353	1370120	1.30737	Yeast	Mucci_1370120	1
Cluster 2354	1386663	0	Not_differential	Mucci_1386663	1
Cluster 2355	1470431	-1.59428	Mycelium	Mucci_1470431	1
Cluster 2356	1471220	-1.08449	Mycelium	Mucci_1471220	1
Cluster 2358	1508018	0	Not_differential	Mucci_1508018	1
Cluster 2359	1511550	0	Not_differential	Mucci_1511550	1
Cluster 2360	1518226	0	Not_differential	Mucci_1518226	1
Cluster 2361	1538321	0	Not_differential	Mucci_1538321	1
Cluster 2362	1544121	0	Not_differential	Mucci_1544121	1
Cluster 2364	1431341	-1.18775	Mycelium	Mucci_1431341	1
Cluster 2365	1443568	5.27822	Yeast	Mucci_1443568	1
Cluster 2366	1454471	-7.33613	Mycelium	Mucci_1454471	1
Cluster 2368	1467142	1.79891	Yeast	Mucci_1467142	1
Cluster 2369	1485973	-7.43584	Mycelium	Mucci_1485973	1
Cluster 2370	1550370	-9.01195	Mycelium	Mucci_1550370	1
Cluster 2371	1555378	-5.03186	Mycelium	Mucci_1555378	1
Cluster 2372	1380357	-3.15209	Mycelium	Mucci_1380357	1
Cluster 2373	1385535	0	Not_differential	Mucci_1385535	1
Cluster 2374	1483811	0	Not_differential	Mucci_1483811	1
Cluster 2375	1504353	1.49715	Yeast	Mucci_1504353	1
Cluster 2376	1509309	-2.73569	Mycelium	Mucci_1509309	1
Cluster 2377	1531697	1.2426	Yeast	Mucci_1531697	1
Cluster 2378	1533700	1.68628	Yeast	Mucci_1533700	1
Cluster 2379	1539459	0	Not_differential	Mucci_1539459	1
Cluster 2380	1542840	0	Not_differential	Mucci_1542840	1
Cluster 2381	1550742	0	Not_differential	Mucci_1550742	1
Cluster 2382	1553967	-1.98112	Mycelium	Mucci_1553967	1
Cluster 2383	1556939	0	Not_differential	Mucci_1556939	1
Cluster 2385	1598085	0	Not_differential	Mucci_1598085	1
Cluster 2386	1599059	-3.25946	Mycelium	Mucci_1599059	1
Cluster 2387	1011519	1.65209	Yeast	Mucci_1011519	1
Cluster 2391	1396454	-3.64511	Mycelium	Mucci_1396454	1
Cluster 2394	1455495	0	Not_differential	Mucci_1455495	1
Cluster 2395	1472582	1.62618	Yeast	Mucci_1472582	1
Cluster 2396	1535323	1.31511	Yeast	Mucci_1535323	1
Cluster 2397	1556780	0	Not_differential	Mucci_1556780	1
Cluster 2400	1554882	-1.24798	Mycelium	Mucci_1554882	1
Cluster 2402	1132586	-2.9443	Mycelium	Mucci_1132586	1
Cluster 2403	1385889	-6.13161	Mycelium	Mucci_1385889	1
Cluster 2404	1392520	0	Not_differential	Mucci_1392520	1
Cluster 2405	1395292	-8.64199	Mycelium	Mucci_1395292	1
Cluster 2406	1451843	-1.17193	Mycelium	Mucci_1451843	1
Cluster 2407	1453776	-6.25184	Mycelium	Mucci_1453776	1
Cluster 2408	1454129	0	Not_differential	Mucci_1454129	1
Cluster 2410	1528353	3.85099	Yeast	Mucci_1528353	1
Cluster 2411	1552901	0	Not_differential	Mucci_1552901	1
Cluster 2412	1592092	0	Not_differential	Mucci_1592092	1
Cluster 2413	1345409	-3.49693	Mycelium	Mucci_1345409	1
Cluster 2415	1408219	0	Not_differential	Mucci_1408219	1
Cluster 2417	1504078	0	Not_differential	Mucci_1504078	1
Cluster 2418	1513904	1.66175	Yeast	Mucci_1513904	1
Cluster 2419	1523206	0	Not_differential	Mucci_1523206	1
Cluster 2420	1547765	-1.17766	Mycelium	Mucci_1547765	1
Cluster 2422	1557143	-1.49014	Mycelium	Mucci_1557143	1
Cluster 2424	1597839	2.19526	Yeast	Mucci_1597839	1
Cluster 2426	1478832	0	Not_differential	Mucci_1478832	1
Cluster 2427	1507229	0	Not_differential	Mucci_1507229	1
Cluster 2430	1595391	4.57701	Yeast	Mucci_1595391	1
Cluster 2431	1452183	0	Not_differential	Mucci_1452183	1
Cluster 2432	1461483	0	Not_differential	Mucci_1461483	1
Cluster 2433	1475458	-7.34912	Mycelium	Mucci_1475458	1
Cluster 2434	1492451	2.52636	Yeast	Mucci_1492451	1
Cluster 2436	1527407	-3.97291	Mycelium	Mucci_1527407	1
Cluster 2437	1552620	0	Not_differential	Mucci_1552620	1
Cluster 2439	1366356	-1.60729	Mycelium	Mucci_1366356	1
Cluster 2440	1378485	1.0197	Yeast	Mucci_1378485	1
Cluster 2441	1499736	0	Not_differential	Mucci_1499736	1
Cluster 2442	1506663	-1.332	Mycelium	Mucci_1506663	1
Cluster 2443	1535965	1.00164	Yeast	Mucci_1535965	1
Cluster 2444	1536707	1.63631	Yeast	Mucci_1536707	1
Cluster 2445	1594485	0	Not_differential	Mucci_1594485	1
Cluster 2446	1354001	-1.3023	Mycelium	Mucci_1354001	1
Cluster 2447	1365718	-1.32292	Mycelium	Mucci_1365718	1
Cluster 2448	1463790	3.60436	Yeast	Mucci_1463790	1
Cluster 2450	1478677	0	Not_differential	Mucci_1478677	1
Cluster 2452	1505111	3.2224	Yeast	Mucci_1505111	1
Cluster 2453	1524418	-1.01097	Mycelium	Mucci_1524418	1
Cluster 2456	1451046	2.01303	Yeast	Mucci_1451046	1
Cluster 2458	1504694	2.14874	Yeast	Mucci_1504694	1
Cluster 2460	1519193	-1.0206	Mycelium	Mucci_1519193	1
Cluster 2461	1520518	1.96811	Yeast	Mucci_1520518	1
Cluster 2462	1534994	-2.05442	Mycelium	Mucci_1534994	1
Cluster 2463	1539225	4.2435	Yeast	Mucci_1539225	1
Cluster 2464	1444183	-3.5073	Mycelium	Mucci_1444183	1
Cluster 2465	1534217	-2.81562	Mycelium	Mucci_1534217	1
Cluster 2466	1544172	1.43172	Yeast	Mucci_1544172	1
Cluster 2467	1601233	0	Not_differential	Mucci_1601233	1
Cluster 2468	1365294	0	Not_differential	Mucci_1365294	1
Cluster 2469	1442637	0	Not_differential	Mucci_1442637	1
Cluster 2471	1508544	-2.92194	Mycelium	Mucci_1508544	1
Cluster 2473	1569097	-6.28662	Mycelium	Mucci_1569097	1
Cluster 2474	1456632	-2.02999	Mycelium	Mucci_1456632	1
Cluster 2475	1465397	-3.75597	Mycelium	Mucci_1465397	1
Cluster 2476	1479208	-4.9274	Mycelium	Mucci_1479208	1
Cluster 2477	1496792	2.54657	Yeast	Mucci_1496792	1
Cluster 2478	1512764	1.6225	Yeast	Mucci_1512764	1
Cluster 2479	1463314	-1.83259	Mycelium	Mucci_1463314	1
Cluster 2480	1463593	0	Not_differential	Mucci_1463593	1
Cluster 2481	1477295	-1.37335	Mycelium	Mucci_1477295	1
Cluster 2482	1493673	1.67191	Yeast	Mucci_1493673	1
Cluster 2483	1500712	-9.23755	Mycelium	Mucci_1500712	1
Cluster 2484	1347570	-1.97001	Mycelium	Mucci_1347570	1
Cluster 2485	1368742	5.74345	Yeast	Mucci_1368742	1
Cluster 2486	1457460	0	Not_differential	Mucci_1457460	1
Cluster 2487	1474444	0	Not_differential	Mucci_1474444	1
Cluster 2488	1501606	5.08221	Yeast	Mucci_1501606	1
Cluster 2490	1510745	1.36668	Yeast	Mucci_1510745	1
Cluster 2491	1519048	4.45263	Yeast	Mucci_1519048	1
Cluster 2492	1536862	2.8064	Yeast	Mucci_1536862	1
Cluster 2494	1549495	-1.20486	Mycelium	Mucci_1549495	1
Cluster 2495	1574611	-3.53201	Mycelium	Mucci_1574611	1
Cluster 2496	1591735	0	Not_differential	Mucci_1591735	1
Cluster 2498	1471462	0	Not_differential	Mucci_1471462	1
Cluster 2499	1525929	0	Not_differential	Mucci_1525929	1
Cluster 2502	1348151	1.07096	Yeast	Mucci_1348151	1
Cluster 2503	1350209	-6.21166	Mycelium	Mucci_1350209	1
Cluster 2504	1382617	-7.7059	Mycelium	Mucci_1382617	1
Cluster 2505	1384491	2.82628	Yeast	Mucci_1384491	1
Cluster 2506	1471804	0	Not_differential	Mucci_1471804	1
Cluster 2508	1511347	-4.01944	Mycelium	Mucci_1511347	1
Cluster 2509	1583890	-7.85394	Mycelium	Mucci_1583890	1
[truncated: 9,617 more rows]
