# Supplementary material for: Coordinated Gene Family Evolution Shapes the Genome of Dimorphic Organisms
Source: Research Square preprint supplement (doi:10.21203/rs.3.rs-6393820/v1), 2025-04-08
Supplement: Supplementary file 6 [file c3f94db1311af18abd086e78.xlsx]

## Sheet: FILTRADOS
GeneID SE EXPRESAN EN MICELIO		GeneID SE EXPRESAN EN LEVADURA																			MYCELIUM	YEAST	NON DIMORPHIC
1496180		1555294																			1000253	1000774	1005084
1447330		1548920																			1000305	1006783	1006218
1591260		1542395																			1001405	1006928	1007055
1586609		1504634																			1003500	1008141	1008750
1520598		1513633																			1005889	1008541	1009533
1548494		1360710																			1006973	1011519	1012075				MYCELIUM	YEAST	NON DIMORPHIC
1590358		1552130																			1007498	1012669	1012462				4620	3560	3436
1474507		1456612																			1008001	1016555	1013639
1533237		1483016																			1008270	1016976	1015036
1395857		1528797																			1009515	1017362	1018076
1498841		1535490																			1010138	1019023	1020114
1458113		1522177																			1014017	1022753	1021363
1515926		1471729																			1014724	1026019	1025415
1502884		1518154																			1015056	1027173	1027592
1442309		1493673																			1016793	1028062	1027693
1476754		1556764																			1018691	1030818	1028366
1516366		1516369																			1019783	1031962	1029732
1516586		1505120																			1022486	1032959	1032073
1500193		1510106																			1022826	1033121	1032419
1531093		1547727																			1023720	1035320	1032434
1477825		1332775																			1024558	1038425	1032451
1577712		1512612																			1025592	1041163	1032487
1475433		1526792																			1026010	1043754	1032497
1546453		1530357																			1028052	1045599	1032523
1369983		1520518																			1028090	1051461	1032529
1353013		1497505																			1029479	1053856	1032545
1593246		1495824																			1029637	1055668	1032760
1580414		1510280																			1030640	1058589	1033020
1537602		1454116																			1031119	1064468	1033449
1374151		1393706																			1031666	1064571	1034856
1446176		1484346																			1032205	1065027	1036243
1587351		1533184																			1032352	1065447	1036529
1509200		1394287																			1034771	1066869	1037064
1528810		1534202																			1035056	1066876	1037214
1468263		1382245																			1035330	1066877	1037881
1381482		1562080																			1036641	1067283	1044493
1366700		1542789																			1038382	1068905	1046970
1586987		1554918																			1041319	1070820	1047839
1514465		1461086																			1042034	1073034	1049140
1451834		1528100																			1042035	1073971	1051163
1532410		1497372																			1042271	1074123	1052100
1539681		1535300																			1045444	1079374	1052872
1433212		1456495																			1046273	1080791	1053451
1465138		1537495																			1048581	1080982	1056201
1545013		1521962																			1049721	1084071	1056452
1463175		1340513																			1054460	1085134	1059290
1460646		1553249																			1054703	1087735	1059750
1595569		1325554																			1055566	1087891	1059895
1494621		1478782																			1056202	1087955	1062673
1480110		1534209																			1058846	1088334	1062864
1031119		1377472																			1059115	1089537	1063598
1549130		1458725																			1059254	1090115	1066354
1556858		1454599																			1059940	1095389	1067654
1484175		1446094																			1061866	1095450	1068058
1447956		1452702																			1062176	1095462	1068629
1373145		1509430																			1062574	1099113	1072904
1530795		1468593																			1063740	1100685	1073568
1483268		1480256																			1065281	1103058	1074221
1522906		1100685																			1066979	1105385	1074697
1391973		1526748																			1068210	1105717	1074824
1332180		1551524																			1068969	1106253	1077247
1485862		1582431																			1071190	1109246	1077439
1473419		1466743																			1072150	1110725	1077628
1349367		1513155																			1072233	1113119	1077630
1370696		1478082																			1074021	1117019	1079553
1536446		1508170																			1079491	1118177	1080467
1528697		1601348																			1079591	1122766	1082620
1492313		1474771																			1079767	1123590	1083862
1485878		1541961																			1082848	1125240	1084072
1502506		1590905																			1083516	1128174	1084073
1382443		1506748																			1086198	1128474	1084554
1506753		1601209																			1090090	1129112	1090522
1381032		1479802																			1090429	1130616	1091674
1521924		1456606																			1091041	1130901	1095027
1453499		1451557																			1092864	1134595	1095467
1587034		1462991																			1096060	1137506	1097666
1479353		1600894																			1096820	1137599	1100601
1372558		1492301																			1097240	1138061	1100689
1467110		1488411																			1100962	1142208	1101948
1324013		1085134																			1102636	1142553	1102279
1461684		1477441																			1105922	1147435	1103712
1586879		1466541																			1106105	1150303	1104440
1514924		1531416																			1106431	1152264	1104879
1466398		1434437																			1107476	1153542	1107076
1414357		1508628																			1108023	1158964	1109021
1511905		1468915																			1110088	1159212	1109149
1590114		1512396																			1110517	1160645	1109525
1365458		1523901																			1110744	1161672	1111419
1501734		1494314																			1110797	1162314	1112021
1591216		1485870																			1113608	1164687	1112979
1597002		1583971																			1115782	1165760	1113102
1463020		1598766																			1116047	1166149	1114088
1455506		1321045																			1119535	1170661	1115916
1360264		1544476																			1119585	1171205	1120358
1479095		1601392																			1120711	1172080	1124728
1378526		1520382																			1124575	1172545	1124862
1333955		1488895																			1124858	1172608	1125752
1500684		1496105																			1126324	1176773	1127538
1394253		1492702																			1127229	1177218	1128198
1546790		1465387																			1128237	1177319	1129326
1024558		1479602																			1128859	1179744	1130421
1490939		1512774																			1131776	1290465	1131325
1513802		1506249																			1132586	1291394	1132858
1493662		1336120																			1132811	1292105	1134463
1523594		1177218																			1137024	1294740	1136209
1535656		1524354																			1137052	1303736	1136709
1455497		1485446																			1137336	1303986	1138192
1499570		1460383																			1140161	1305595	1139055
1502576		1369708																			1140241	1306200	1139283
1532248		1366033																			1141391	1307227	1139480
1459565		1456603																			1141588	1311202	1140095
1584681		1538734																			1144010	1312581	1141516
1477953		1516124																			1144134	1314402	1143195
1527312		1473606																			1147477	1316505	1145560
1537960		1517363																			1147952	1317116	1146405
1595680		1485268																			1147999	1320004	1147868
1378068		1464356																			1148843	1320545	1148437
1591901		1500319																			1149678	1320650	1150084
1535741		1535516																			1150217	1320690	1151164
1516482		1375653																			1151236	1321045	1154965
1548854		1524906																			1152014	1321481	1155312
1541823		1534694																			1152884	1321644	1156988
1471544		1459285																			1155573	1321691	1159901
1441627		1463338																			1156345	1321812	1160282
1385889		1591267																			1156571	1321814	1161648
1516911		1390719																			1159667	1321818	1165749
1468170		1483066																			1161390	1322572	1167187
1557627		1538065																			1161729	1322597	1170198
1589529		1458054																			1161978	1322880	1174352
1437783		1545800																			1163071	1323143	1174548
1365292		1534673																			1164248	1323213	1175257
1601554		1524353																			1164253	1323491	1176769
1527519		1521125																			1165324	1323604	1177142
1463710		1466549																			1166306	1323894	1177367
1479947		1547552																			1167480	1323901	1177383
1321417		1486511																			1169234	1324007	1178961
1387697		1541868																			1169398	1324211	1180041
1106431		1541450																			1171734	1324589	1286794
1473944		1477622																			1172053	1324593	1288803
1464670		1594803																			1174567	1324687	1291844
1529446		1459350																			1176600	1324878	1292415
1485652		1504631																			1291525	1325026	1292418
1477165		1511833																			1293609	1325554	1292878
1516997		1535323																			1297275	1325814	1292980
1351494		1502908																			1297765	1326305	1293762
1490880		1528925																			1297844	1326364	1295939
1497304		1383337																			1301999	1326514	1296613
1457521		1172545																			1305257	1326522	1296696
1488677		1378700																			1306538	1326694	1297474
1457129		1349844																			1306666	1326901	1299047
1368110		1546204																			1318131	1327596	1299334
1447092		1459618																			1319340	1328507	1299991
1353007		1379354																			1319384	1329483	1304656
1473385		1417603																			1319647	1329765	1305405
1393736		1541561																			1319807	1329977	1306212
1535074		1582730																			1319860	1330460	1307689
1549423		1491090																			1319968	1330595	1307962
1502584		1464522																			1320314	1330732	1308302
1346969		1565517																			1320654	1330758	1311981
1527620		1393057																			1320893	1330982	1312433
1588502		1474983																			1321074	1331398	1314023
1456131		1520818																			1321135	1332224	1319368
1378177		1519086																			1321356	1332298	1319392
1484004		1461079																			1321396	1332498	1319683
1367627		1563853																			1321417	1332759	1319799
1467427		1501354																			1321719	1332775	1319865
1556656		1451751																			1321731	1333617	1320260
1445953		1526509																			1322160	1333881	1320264
1494808		1490522																			1322266	1334448	1320527
1500568		1503540																			1322359	1334502	1320709
1473620		1492742																			1322460	1334573	1320792
1451144		1514208																			1322491	1335674	1320839
1375812		1536710																			1322923	1335868	1320849
1489895		1476619																			1323035	1335983	1321264
1362444		1109246																			1323195	1336014	1321416
1335829		1447083																			1323387	1336120	1321530
1519838		1393427																			1323517	1336486	1321592
1514484		1557296																			1323600	1336652	1321633
1540039		1556694																			1323750	1337077	1322101
1599215		1544759																			1324013	1337122	1322162
1511327		1588635																			1324267	1338171	1322215
1586347		1567159																			1324337	1338322	1322622
1549709		1570897																			1324359	1338355	1322819
1347030		1494084																			1324426	1338377	1322836
1448244		1585851																			1324476	1338466	1322971
1392716		1463951																			1324484	1338814	1323017
1396139		1526639																			1324592	1339501	1323056
1451329		1454558																			1324971	1339657	1323745
1529552		1357042																			1325012	1339755	1323767
1484069		1551972																			1325087	1339894	1323850
1528630		1325026																			1325435	1340513	1323916
1524594		1454648																			1325533	1340604	1324040
1545731		1452915																			1325974	1341134	1324200
1467506		1458852																			1326131	1341313	1324519
1453634		1491599																			1326411	1342014	1324585
1517042		1385582																			1326529	1342193	1324887
1549723		1505949																			1326827	1342374	1325216
1469869		1550058																			1327071	1342711	1325266
1416601		1525570																			1327164	1343040	1325561
1465504		1376629																			1327299	1343354	1325592
1375399		1453925																			1327707	1343398	1325598
1518536		1477972																			1327779	1343417	1325718
1521867		1597455																			1327832	1343642	1325720
1383286		1535786																			1328040	1344596	1325860
1476430		1504289																			1328137	1344610	1325942
1493974		1588338																			1328193	1344666	1326058
1457376		1498211																			1328400	1344959	1326211
1493858		1573180																			1328481	1345227	1326334
1382617		1526457																			1328601	1345490	1326496
1468741		1525207																			1329057	1345638	1326509
1526737		1553721																			1330851	1345802	1326538
1494058		1443869																			1330912	1346373	1326639
1454092		1541938																			1330948	1346523	1326900
1523822		1513298																			1330980	1346588	1327113
1363019		1521729																			1331636	1346996	1327123
1432453		1545523																			1331991	1347194	1327579
1523399		1393075																			1332087	1347359	1327805
1449798		1479957																			1332337	1347452	1328091
1453998		1458415																			1332728	1347705	1328301
1534907		1470163																			1332752	1347822	1328378
1000253		1391758																			1332793	1347837	1328403
1505679		1453117																			1333389	1348032	1328410
1453515		1495667																			1333678	1348106	1328469
1342072		1532362																			1333806	1348151	1328821
1460757		1500821																			1333955	1348231	1329380
1516013		1500185																			1333967	1348421	1329585
1386575		1347837																			1334309	1348452	1329722
1502557		1596404																			1334481	1348686	1330039
1540644		1479280																			1334600	1349300	1330081
1018691		1464965																			1334891	1349328	1330150
1565158		1483038																			1334980	1349346	1330205
1449029		1370120																			1334985	1349554	1330384
1507244		1465228																			1335150	1349781	1330660
1562884		1499896																			1335238	1349830	1331813
1552867		1453519																			1335409	1349844	1331965
1508037		1526668																			1335643	1349920	1332125
1516339		1489601																			1335829	1350093	1332180
1451517		1525154																			1335846	1350265	1332386
1568050		1486164																			1336324	1350271	1332428
1516079		1501036																			1336367	1350309	1332522
1140241		1519190																			1336444	1350315	1332766
1543406		1480058																			1336474	1350382	1332828
1498426		1519928																			1336606	1350393	1333212
1376907		1590338																			1337251	1350558	1333233
1443180		1058589																			1337379	1350616	1333493
1557359		1360470																			1337482	1350665	1333547
1599283		1320650																			1338060	1350683	1333669
1446167		1500814																			1339121	1350925	1334032
1516406		1380311																			1339149	1351014	1334438
1578119		1458664																			1339278	1351323	1334638
1517004		1538912																			1339505	1351441	1334687
1599345		1099113																			1339519	1351491	1335106
1482579		1566726																			1339933	1351554	1335448
1455850		1544849																			1340256	1351755	1335537
1487973		1468868																			1340510	1351855	1335582
1551079		1551656																			1340641	1351860	1335736
1598202		1470203																			1340681	1352156	1336353
1498476		1540325																			1340734	1352594	1336896
1500561		1552698																			1340809	1352787	1337672
1525774		1433082																			1341214	1353459	1338180
1552029		1487682																			1341254	1353596	1338733
1477472		1474136																			1341498	1354038	1338756
1515225		1455898																			1341530	1354411	1338763
1378572		1493481																			1341565	1354449	1339001
1483128		1464175																			1341725	1354579	1339056
1493407		1553903																			1341746	1354589	1339078
1471342		1530667																			1342066	1354749	1339172
1353746		1514323																			1342072	1355113	1339464
1498571		1354749																			1342161	1355173	1339525
1378888		1526250																			1342386	1355208	1339530
1522255		1352589																			1342995	1355261	1339966
1497176		1481172																			1343115	1355321	1340244
1336444		1466830																			1343225	1355503	1340321
1374824		1456594																			1343272	1355556	1340477
1347525		1351860																			1343381	1355586	1340550
1453569		1500825																			1344090	1355596	1340684
1542992		1095462																			1344098	1355627	1341127
1497643		1464386																			1344170	1355645	1341183
1451656		1299334																			1344172	1355971	1341249
1396611		1540682																			1344199	1356095	1341366
1000305		1466816																			1344598	1356192	1341616
1489072		1542756																			1344607	1356251	1341856
1335846		1365588																			1344997	1356402	1342055
1466194		1378462																			1345133	1356660	1342197
1497344		1518822																			1345409	1356905	1342340
1529873		1134595																			1345849	1357157	1342488
1489610		1442683																			1345897	1357245	1342573
1463924		1505420																			1345902	1357544	1342989
1389313		1524633																			1345938	1357575	1343061
1484040		1491389																			1346179	1357712	1343088
1377346		1457441																			1346223	1358118	1343196
1460641		1449387																			1346268	1358291	1343285
1448500		1516247																			1346320	1358409	1343476
1594149		1539778																			1346345	1358529	1343873
1358871		1493649																			1346383	1358830	1344229
1392067		1473555																			1346466	1358920	1344511
1319384		1490457																			1346507	1358995	1344809
1340681		1324211																			1346571	1359216	1345359
1474222		1538601																			1346612	1359239	1345463
1490733		1468445																			1346716	1359464	1345670
1553049		1547071																			1346779	1359553	1345716
1507127		1504213																			1346800	1359571	1345894
1593109		1535877																			1346962	1360022	1346017
1511881		1564132																			1346969	1360056	1346378
1527832		1538902																			1347007	1360275	1346385
1323195		1412833																			1347010	1360378	1346461
1497290		1552208																			1347018	1360410	1346483
1079553		1494247																			1347030	1360450	1346495
1497542		1538346																			1347043	1360470	1346617
1479529		1523130																			1347260	1360481	1346984
1506074		1066877																			1347388	1360545	1347049
1373830		1324687																			1347454	1360710	1347143
1448109		1536692																			1347481	1361103	1347424
1535163		1511052																			1347525	1361179	1347665
1443421		1350265																			1347570	1361193	1347914
1417175		1117019																			1347686	1361519	1347933
1485486		1043754																			1347700	1362017	1348411
1455582		1497041																			1347812	1362057	1348474
1581301		1489413																			1347831	1362180	1348570
1557738		1395201																			1347865	1362387	1349510
1593427		1073971																			1347922	1362740	1349511
1594914		1524040																			1347930	1362793	1349610
1577715		1371135																			1348102	1362933	1349753
1163071		1510726																			1348115	1363003	1350419
1395610		1535871																			1348131	1363054	1350971
1546810		1466198																			1348192	1363063	1350997
1553141		1453813																			1348301	1363500	1351060
1475875		1497461																			1348346	1363579	1351096
1347700		1368463																			1348539	1363706	1351144
1541836		1553719																			1348566	1363943	1351436
1486451		1455336																			1348608	1364035	1351607
1448105		1546030																			1348778	1364309	1351648
1496222		1520891																			1348861	1364349	1351691
1463888		1528747																			1348871	1364659	1351749
1346383		1505835																			1348890	1364807	1351761
1437982		1462131																			1348900	1365349	1351895
1585180		1513552																			1348925	1365395	1351906
1516010		1555854																			1348965	1365450	1352179
1355822		1396361																			1349041	1365504	1352220
1592244		1463557																			1349062	1365517	1352293
1492358		1531359																			1349083	1365588	1352540
1593638		1520847																			1349107	1365601	1352589
1461869		1550399																			1349249	1365741	1353082
1370951		1476312																			1349257	1365808	1353115
1386661		1480271																			1349367	1365813	1353525
1533187		1545481																			1349376	1365841	1353586
1552830		1510662																			1349448	1365920	1353623
1496327		1448475																			1349700	1366033	1353802
1492436		1008541																			1349755	1366148	1353872
1454781		1471970																			1349946	1366387	1353914
1482264		1537805																			1350034	1366471	1354004
1486650		1541103																			1350043	1366549	1354117
1476147		1364807																			1350069	1366939	1354315
1322359		1551875																			1350091	1366981	1354329
1373480		1526973																			1350200	1367006	1354593
1180041		1489186																			1350209	1367326	1354597
1458012		1517235																			1350320	1367601	1354667
1454143		1477751																			1350385	1367633	1354762
1355184		1601362																			1350552	1367826	1354930
1394117		1478318																			1350651	1368057	1354987
1351166		1538633																			1350746	1368260	1355020
1548855		1505395																			1350752	1368451	1355118
1508769		1489813																			1350842	1368463	1355172
1545638		1545030																			1350960	1368535	1355268
1490318		1492174																			1351053	1368742	1355282
1464015		1536721																			1351079	1368751	1355345
1395147		1489301																			1351086	1368755	1355468
1553590		1584525																			1351166	1368998	1355485
1465892		1387688																			1351177	1369036	1355512
1475880		1496886																			1351260	1369212	1355519
1545342		1317116																			1351314	1369295	1355777
1472378		1537650																			1351398	1369325	1355969
1548348		1548593																			1351437	1369414	1356120
1583157		1593020																			1351494	1369708	1356177
1513990		1459427																			1351540	1369921	1356462
1361789		1522709																			1351582	1370118	1356556
1513041		1597496																			1351740	1370120	1356814
1524571		1566395																			1351757	1370182	1356829
1350200		1532631																			1351799	1370208	1356890
1528712		1539234																			1351863	1370267	1356893
1459002		1599902																			1351920	1370463	1357042
1383246		1588339																			1351971	1370704	1357100
1353435		1533864																			1352145	1370793	1357427
1588774		1480908																			1352160	1370833	1357591
1536916		1453906																			1352308	1371135	1357703
1582758		1372940																			1352372	1371696	1357716
1506475		1366148																			1352516	1371713	1357784
1395629		1367286																			1352597	1371776	1357935
1376525		1527270																			1352604	1372056	1357946
1518461		1556822																			1352670	1372100	1357983
1379179		1537013																			1352741	1372566	1358318
1495853		1464312																			1352752	1372940	1358375
1536104		1531745																			1352963	1373296	1358517
1538871		1363579																			1353007	1373733	1358656
1492027		1482282																			1353013	1373768	1358675
1569097		1453214																			1353063	1373811	1358768
1503257		1487776																			1353121	1374022	1358862
1518335		1564493																			1353135	1374041	1358946
1557658		1452120																			1353146	1374157	1359273
1582818		1530932																			1353183	1374170	1359278
1536357		1515151																			1353195	1374243	1359521
1543649		1472610																			1353287	1374463	1359524
1480015		1546569																			1353435	1374549	1360046
1508444		1382918																			1353499	1374570	1360077
1378134		1550023																			1353562	1374920	1360250
1524941		1540221																			1353576	1375001	1360295
1472060		1389606																			1353724	1375039	1360518
1476131		1565747																			1353746	1375047	1360586
1576042		1512714																			1353851	1375186	1360648
1461324		1358318																			1354001	1375416	1360731
1554817		1541548																			1354025	1375552	1360745
1361204		1539792																			1354087	1375619	1360805
1599552		1497590																			1354233	1375628	1360869
1533515		1505034																			1354331	1375653	1360872
1381926		1360545																			1354395	1375802	1360903
1372594		1550389																			1354524	1375836	1361187
1538134		1463849																			1354679	1375940	1361624
1532793		1540227																			1354885	1375964	1361740
1465858		1514836																			1354895	1376164	1361743
1543378		1522286																			1354929	1376181	1361866
1552645		1450817																			1354959	1376222	1361887
1375680		1358409																			1354963	1376440	1361981
1482860		1504362																			1355022	1376476	1362448
1527021		1385020																			1355025	1376629	1362627
1560227		1466597																			1355139	1376807	1362648
1480340		1499016																			1355184	1376994	1362775
1572680		1532954																			1355227	1377002	1362790
1537713		1538758																			1355237	1377029	1362809
1473228		1461576																			1355265	1377153	1363150
1452228		1509434																			1355326	1377358	1363165
1510693		1595698																			1355369	1377367	1363211
1518839		1598008																			1355436	1377429	1363376
1465738		1595738																			1355516	1377472	1363377
1518758		1452118																			1355782	1377489	1363444
1484192		1534892																			1355789	1377833	1363539
1547023		1463786																			1355822	1377855	1363657
1453076		1511510																			1355828	1378249	1363792
1502735		1519035																			1355922	1378276	1363839
1515134		1510080																			1355982	1378423	1364211
1587213		1563925																			1356070	1378447	1364507
1455347		1451840																			1356076	1378462	1364625
1533021		1506005																			1356084	1378485	1364817
1512391		1489490																			1356221	1378700	1364860
1369584		1597432																			1356314	1378784	1365262
1476307		1530125																			1356380	1378825	1365294
1513949		1515093																			1356478	1378979	1365497
1516973		1600344																			1356510	1379098	1365766
1501959		1528708																			1356532	1379354	1365840
1368475		1515216																			1356753	1379509	1366139
1552005		1542322																			1356832	1379840	1366214
1499672		1466403																			1356982	1380311	1366296
1547503		1360450																			1357096	1380598	1366340
1530196		1541431																			1357266	1380607	1366421
1497317		1586271																			1357279	1380639	1366497
1522160		1515454																			1357320	1380743	1366514
1588946		1486335																			1357394	1380827	1366647
1482184		1446422																			1357419	1381205	1367016
1470240		1016555																			1357487	1381695	1367025
1481419		1517631																			1357493	1381800	1367109
1467350		1499362																			1357504	1381902	1367199
1554823		1528739																			1357753	1382031	1367207
1346223		1538546																			1357832	1382236	1367286
1110744		1529345																			1357858	1382431	1367580
1536093		1459199																			1357931	1382775	1368060
1591585		1535025																			1358140	1382830	1368112
1167480		1461112																			1358145	1382908	1368387
1466174		1509686																			1358498	1382918	1368424
1054703		1476546																			1358663	1383001	1368487
1360452		1585792																			1358715	1383337	1368525
1535096		1547052																			1358765	1383462	1368904
1541792		1469921																			1358824	1383492	1368942
1551253		1355596																			1358871	1384007	1368973
1520335		1469317																			1358887	1384061	1369070
1491721		1365349																			1359020	1384066	1369208
1469599		1489486																			1359075	1384074	1369271
1475329		1460410																			1359117	1384109	1369297
1365618		1471694																			1359189	1384491	1369306
1443910		1378784																			1359316	1384535	1369487
1515886		1391783																			1359344	1384651	1369800
1354524		1442949																			1359379	1385020	1369869
1058846		1551879																			1359484	1385063	1370067
1601434		1474403																			1359486	1385353	1370079
1478604		1476283																			1359587	1385506	1370261
1580768		1325720																			1359682	1385582	1370409
1509360		1482688																			1359712	1385755	1370489
1509721		1512122																			1359783	1385798	1371085
1538143		1453784																			1359889	1386293	1371182
1451738		1502350																			1359901	1386443	1371217
1591725		1555118																			1359997	1386627	1371288
1591401		1593475																			1360018	1386647	1371453
1511339		1528940																			1360061	1386939	1371990
1522550		1522024																			1360245	1386974	1372049
1333678		1461558																			1360264	1387047	1372052
1548165		1439343																			1360320	1387057	1372116
1389679		1125240																			1360356	1387115	1372122
1395861		1494320																			1360381	1387164	1372246
1590547		1497653																			1360385	1387181	1372278
1467657		1509693																			1360444	1387380	1372622
1475458		1525847																			1360445	1387432	1372664
1468417		1373811																			1360452	1387688	1372955
1481772		1471822																			1360559	1387748	1373068
1548471		1536423																			1360607	1387967	1373150
1347865		1503379																			1360612	1388126	1373425
1524900		1520293																			1360939	1388182	1373525
1446232		1350315																			1361034	1388477	1373542
1502239		1493670																			1361146	1388546	1373581
1556854		1392141																			1361183	1388805	1373874
1596900		1487255																			1361204	1388838	1373974
1545026		1533581																			1361249	1389137	1374135
1503002		1489285																			1361253	1389414	1374227
1366194		1536779																			1361258	1389448	1374655
1586127		1456582																			1361481	1389512	1374773
1454471		1477027																			1361543	1389606	1374988
1390055		1527721																			1361616	1389682	1375008
1546438		1527913																			1361789	1389743	1375407
1473364		1482142																			1361940	1389761	1375673
1476501		1467102																			1361949	1389876	1375730
1476152		1323901																			1362081	1389979	1375876
1530803		1531533																			1362083	1389995	1375971
1478500		1491681																			1362225	1390361	1376187
1501111		1513955																			1362288	1390719	1376248
1533010		1442255																			1362444	1390986	1376320
1433625		1516801																			1362497	1391134	1376338
1520282		1538869																			1362506	1391181	1376427
1451201		1509116																			1362520	1391658	1376780
1543456		1356095																			1362638	1391758	1376919
1489723		1453237																			1362797	1391783	1376997
1557610		1504993																			1362921	1391816	1377314
1508562		1601127																			1362943	1391966	1377545
1452060		1468995																			1362981	1392021	1377565
1518039		1540081																			1363019	1392095	1377945
1386918		1523329																			1363237	1392129	1378068
1552014		1501186																			1363260	1392141	1378079
1383741		1446236																			1363262	1392216	1378122
1359316		1026019																			1363289	1392393	1378180
1530915		1541728																			1363300	1392552	1378442
1596875		1510394																			1363415	1392577	1378578
1549372		1471125																			1363436	1392746	1378747
1583212		1491448																			1363816	1392807	1378750
1521190		1529059																			1363928	1393057	1378924
1460957		1448947																			1363977	1393075	1379016
1468191		1463582																			1364104	1393320	1379057
1524506		1471701																			1364222	1393706	1379085
1446329		1533929																			1364265	1393754	1379197
1466364		1492288																			1364318	1393798	1379417
1499760		1533896																			1364327	1393893	1379569
1510755		1593957																			1364399	1393994	1379598
1454398		1527738																			1364405	1394045	1379688
1453987		1463806																			1364563	1394102	1379829
1533506		1481432																			1364688	1394171	1379894
1540216		1491617																			1364809	1394287	1380020
1496978		1505043																			1364873	1394405	1380115
1553583		1391828																			1364923	1394518	1380165
1593451		1525393																			1365006	1394564	1380305
1481706		1535320																			1365018	1395134	1380419
1593471		1504195																			1365027	1395201	1380428
1509285		1371713																			1365056	1395371	1381026
1581619		1551529																			1365109	1395398	1381209
1479208		1510579																			1365111	1395404	1381594
1350552		1479933																			1365138	1395526	1381853
1357320		1560124																			1365180	1396020	1381859
1568089		1319683																			1365250	1396025	1382004
1489540		1350309																			1365292	1396098	1382007
1518816		1459338																			1365382	1396361	1382101
1374232		1505393																			1365458	1396363	1382245
1492570		1599537																			1365502	1407531	1382443
1458152		1537230																			1365532	1407545	1382519
1453776		1343354																			1365538	1407576	1382570
1364327		1361103																			1365618	1407586	1382707
1557646		1507880																			1365718	1407587	1382740
1447366		1451197																			1365802	1407617	1382746
1463599		1594522																			1365835	1407619	1383031
1528592		1367006																			1366113	1407661	1383197
1532375		1538476																			1366133	1407718	1383324
1508449		1447039																			1366194	1408048	1383370
1349946		1483593																			1366356	1408977	1383598
1544072		1453284																			1366376	1409043	1383620
1495110		1522452																			1366486	1409390	1383667
1499263		1469018																			1366537	1409926	1383741
1494321		1556688																			1366563	1410375	1384104
1374885		1387115																			1366687	1410392	1384160
1583595		1393994																			1366693	1410423	1384442
1513058		1595301																			1366700	1410737	1384482
1453474		1496694																			1366719	1410908	1384878
1384767		1496950																			1366756	1411023	1385183
1513834		1375619																			1366857	1411149	1385426
1460297		1481253																			1367058	1411357	1385535
1498325		1499666																			1367154	1411518	1385565
1472258		1486181																			1367223	1411841	1385707
1527407		1460753																			1367255	1411855	1385851
1464428		1534351																			1367505	1412833	1385923
1457883		1482072																			1367627	1413544	1386007
1395234		1493455																			1367673	1414504	1386130
1481364		1525308																			1367679	1415184	1386167
1499551		1494823																			1367719	1416332	1386373
1453374		1526248																			1367844	1416401	1386588
1476918		1381026																			1367862	1416617	1386663
1523474		1464744																			1367889	1416800	1386779
1391285		1553861																			1368110	1417078	1386794
1456274		1588698																			1368152	1417603	1386807
1596209		1472606																			1368227	1417689	1387376
1500095		1513579																			1368368	1429968	1387787
1500038		1377545																			1368475	1430337	1387933
1491717		1523940																			1368492	1430444	1388337
1527940		1516020																			1368542	1431000	1388382
1482274		1472924																			1368652	1431483	1388721
1526638		1481697																			1368883	1431801	1388848
1528113		1343196																			1369083	1431891	1389272
1592582		1519623																			1369147	1432037	1389330
1450974		1505973																			1369377	1432107	1389509
1477123		1584121																			1369466	1432513	1389711
1554083		1526068																			1369475	1432579	1389798
1484838		1480816																			1369521	1432641	1390105
1532543		1517492																			1369584	1432833	1390521
1387328		1470187																			1369598	1433155	1390682
1465656		1487407																			1369688	1433346	1390728
1531586		1436541																			1369872	1433487	1390952
1341725		1490974																			1369978	1433594	1391128
1370097		1515732																			1369983	1433763	1391294
1576785		1511318																			1370017	1434109	1391405
1467536		1359216																			1370040	1434436	1391447
1544675		1506884																			1370097	1434437	1391513
1500271		1568343																			1370343	1434987	1391560
1347010		1596676																			1370356	1435483	1391583
1507471		1599213																			1370469	1435521	1391605
1320314		1535117																			1370615	1435961	1391828
1538073		1494988																			1370696	1435987	1391836
1526140		1551863																			1370719	1436003	1392074
1377522		1520494																			1370744	1436138	1392229
1510371		1523934																			1370913	1436541	1392343
1540632		1536925																			1370916	1436868	1392374
1530345		1592058																			1370951	1437007	1392411
1463295		1587010																			1370995	1437161	1392454
1359783		1387967																			1371044	1437718	1392520
1557725		1460628																			1371143	1438131	1392525
1379184		1493594																			1371386	1438486	1393029
1383313		1527938																			1371392	1439124	1393153
1382080		1549036																			1371485	1439343	1393427
1318131		1541735																			1371527	1439783	1393432
1458586		1543329																			1371530	1439947	1393691
1457466		1584571																			1371914	1440527	1393702
1508822		1321818																			1371978	1440666	1393740
1526167		1495576																			1372059	1441637	1393760
1385014		1482725																			1372126	1441688	1393837
1483544		1409926																			1372134	1441941	1393863
1378586		1456862																			1372168	1442139	1393955
1496505		1530019																			1372401	1442255	1394418
1515787		1593123																			1372410	1442266	1394601
1467026		1521108																			1372420	1442352	1394690
1536138		1459993																			1372492	1442365	1394734
1517048		1584919																			1372523	1442540	1394738
1393292		1464628																			1372529	1442573	1394793
1395063		1394102																			1372550	1442645	1395033
1490791		1519540																			1372558	1442680	1395163
1481893		1563619																			1372563	1442683	1395199
1478934		1539914																			1372594	1442702	1395443
1336474		1532073																			1372613	1442810	1395506
1506696		1516976																			1372654	1442949	1395592
1470386		1453278																			1372666	1443216	1395765
1456043		1552528																			1372713	1443387	1395780
1480596		1460272																			1372926	1443494	1395822
1453722		1510631																			1373133	1443568	1396006
1383244		1407531																			1373145	1443664	1396125
1471990		1465544																			1373181	1444037	1396154
1454892		1460475																			1373222	1444251	1396173
1337482		1512999																			1373260	1444467	1396220
1442967		1542027																			1373264	1444471	1396245
1530819		1540825																			1373392	1444518	1396347
1485083		1481195																			1373480	1444640	1396445
1376005		1549732																			1373553	1444763	1396480
1364318		1453344																			1373582	1444783	1396604
1433615		1161672																			1373618	1444832	1396676
1372563		1383492																			1373664	1444929	1407258
1543245		1471942																			1373746	1445145	1407305
1348301		1460610																			1373776	1445162	1407359
1384248		1356402																			1373830	1445333	1407546
1504426		1483598																			1373922	1445510	1407588
1360245		1355645																			1373983	1445552	1407899
1519907		1462087																			1374032	1445765	1408219
1487590		1511631																			1374048	1445786	1408369
1465108		1527123																			1374151	1445835	1408495
1369872		1499159																			1374232	1445917	1408696
1441302		1510008																			1374421	1446094	1408730
1572488		1550627																			1374450	1446132	1408929
1468448		1534483																			1374460	1446165	1408985
1496926		1510704																			1374591	1446187	1409030
1462426		1497476																			1374601	1446236	1409073
1504151		1598342																			1374693	1446240	1409127
1544364		1336353																			1374824	1446378	1409162
1482180		1446240																			1374861	1446422	1409192
1587041		1554843																			1374875	1446438	1409222
1461850		1528511																			1374885	1446440	1409345
1586495		1540477																			1375115	1446476	1409371
1464509		1485518																			1375147	1446512	1409402
1533160		1448557																			1375246	1446561	1409672
1584834		1490923																			1375392	1446638	1409682
1448693		1479384																			1375399	1446683	1409733
1141391		1554927																			1375469	1446729	1410069
1510024		1384061																			1375481	1446740	1410162
1396454		1539719																			1375585	1446763	1410203
1369466		1556645																			1375680	1446778	1410204
1555750		1541565																			1375698	1446787	1410490
1471373		1450370																			1375710	1446829	1410689
1508379		1537172																			1375711	1446951	1410695
1525042		1359239																			1375715	1447031	1410718
1596453		1449632																			1375812	1447039	1410819
1478761		1566886																			1376005	1447083	1410827
1496226		1473258																			1376077	1447448	1410930
1511848		1372056																			1376086	1447455	1411025
1354395		1458605																			1376132	1447547	1411102
1381524		1595779																			1376167	1447814	1411133
1368542		1333881																			1376229	1448018	1411183
1369521		1515518																			1376269	1448038	1411276
1557085		1522655																			1376283	1448200	1411434
1494209		1526062																			1376499	1448225	1411649
1492001		1525421																			1376525	1448262	1411947
1476952		1532545																			1376571	1448279	1412038
1534282		1346996																			1376699	1448300	1412150
1487296		1483482																			1376789	1448331	1412751
1457179		1475717																			1376907	1448348	1412843
1374421		1468924																			1377042	1448475	1413078
1370017		1477959																			1377098	1448557	1413417
1526856		1474953																			1377103	1448712	1413923
1480634		1522421																			1377156	1448926	1413928
1394291		1474946																			1377288	1448933	1414138
1566879		1123590																			1377346	1448947	1414368
1465376		1487070																			1377456	1448965	1414632
1364265		1500133																			1377508	1449310	1414716
1524223		1483550																			1377522	1449387	1415118
1464477		1504365																			1377562	1449479	1415239
1481290		1491790																			1377588	1449594	1415251
1410353		1508067																			1377605	1449632	1415355
1465721		1460458																			1377712	1449740	1415356
1589547		1595325																			1377806	1449754	1416149
1354959		1456931																			1377814	1449775	1416446
1541805		1495297																			1377842	1449776	1416922
1495974		1488939																			1377870	1450370	1416923
1477598		1533378																			1377941	1450601	1417126
1356221		1393798																			1377954	1450791	1417152
1582869		1531888																			1378007	1450817	1417179
1477376		1523794																			1378062	1451046	1417271
1507703		1541025																			1378072	1451333	1417419
1531873		1355586																			1378081	1451557	1417424
1488753		1457263																			1378100	1451573	1417726
1500586		1469863																			1378111	1451668	1417782
1470048		1541952																			1378127	1451751	1417801
1527416		1364035																			1378134	1451780	1417915
1545922		1505112																			1378177	1451822	1417918
1437683		1464650																			1378313	1451840	1417919
1545262		1512295																			1378526	1451930	1417992
1322491		1350271																			1378545	1451962	1418068
1471814		1485455																			1378572	1452006	1429912
1350034		1527875																			1378586	1452026	1429934
1514476		1382775																			1378752	1452065	1429993
1579282		1484566																			1378819	1452112	1429994
1360061		1452431																			1378841	1452118	1430068
1522210		1498713																			1378888	1452120	1430166
1341565		1585418																			1378989	1452128	1430167
1478208		1544755																			1378995	1452214	1430197
1503627		1535886																			1379047	1452288	1430355
1526742		1311202																			1379179	1452431	1430522
1532036		1586768																			1379184	1452702	1430583
1513023		1554832																			1379212	1452857	1430701
1557673		1477877																			1379220	1452915	1430768
1391229		1509408																			1379248	1452924	1430883
1459039		1522091																			1379270	1452957	1430884
1491480		1548293																			1379339	1452967	1430893
1321731		1503789																			1379347	1452978	1430989
1589520		1586050																			1379351	1452983	1431092
1550427		1516443																			1379602	1453011	1431373
1500658		1521260																			1379674	1453067	1431505
1344997		1480913																			1379739	1453117	1431535
1444183		1522275																			1379809	1453132	1431568
1496248		1496706																			1379837	1453214	1431688
1473780		1488557																			1379918	1453222	1431750
1493752		1600988																			1379970	1453233	1431826
1363977		1485531																			1380085	1453237	1431844
1346716		1560289																			1380177	1453250	1431936
1354679		1501350																			1380211	1453278	1431939
1156345		1384109																			1380227	1453284	1431940
1499148		1500307																			1380357	1453344	1431959
1566005		1465833																			1380467	1453422	1431965
1537158		1535683																			1380478	1453479	1431971
1519473		1515568																			1380523	1453482	1432057
1482760		1507480																			1380612	1453519	1432223
1349376		1504353																			1380646	1453553	1432280
1486677		1512497																			1380664	1453570	1432496
1601359		1583067																			1380992	1453651	1432553
1448092		1457722																			1381006	1453654	1432568
1511196		1365920																			1381016	1453711	1432616
1453576		1458619																			1381032	1453734	1432723
1435031		1556444																			1381038	1453742	1432729
1492187		1323894																			1381061	1453784	1432764
1330980		1503924																			1381090	1453869	1432906
1502130		1499283																			1381438	1453879	1433082
1433443		1358920																			1381482	1453906	1433315
1516580		1494253																			1381524	1453917	1433558
1492564		1543223																			1381556	1453986	1433608
1373264		1484484																			1381561	1453995	1433615
1376789		1568132																			1381604	1454083	1433773
1508281		1371288																			1381758	1454116	1433839
1495176		1540403																			1381759	1454125	1433840
1345409		1557265																			1381769	1454182	1433933
1490863		1547040																			1381900	1454240	1433948
1570453		1507157																			1381926	1454395	1433989
1540464		1393320																			1382021	1454542	1433999
1528036		1407576																			1382080	1454558	1434063
1495645		1465344																			1382140	1454575	1434112
1499548		1474944																			1382242	1454577	1434247
1531060		1415184																			1382285	1454599	1434328
1474666		1459789																			1382313	1454642	1434329
1353195		1531721																			1382471	1454648	1434401
1473889		1393893																			1382617	1454737	1434402
1542151		1393760																			1382672	1454866	1434478
1524471		1375836																			1382688	1454956	1434599
1446346		1538606																			1382732	1455014	1434796
1485927		1008141																			1383244	1455114	1434876
1442415		1555759																			1383246	1455197	1435223
1368492		1462103																			1383286	1455204	1435231
1548828		1438242																			1383313	1455213	1435309
1458917		1525438																			1383457	1455336	1435390
1448896		1518596																			1383483	1455413	1435452
1571975		1460257																			1383596	1455509	1435453
1501103		1512307																			1383614	1455513	1435503
1449027		1519546																			1383626	1455546	1435626
1416449		1469315																			1383724	1455558	1435723
1545955		1445830																			1383729	1455695	1435751
1601029		1593265																			1383759	1455761	1435844
1138192		1539479																			1383835	1455762	1436073
1554507		1532165																			1383935	1455821	1436142
1588845		1501776																			1384036	1455834	1436501
1485399		1508719																			1384157	1455837	1436603
1494035		1467079																			1384248	1455846	1436668
1482230		1541342																			1384257	1455858	1436866
1493009		1551538																			1384263	1455898	1436907
1455797		1597478																			1384361	1455904	1436908
1588464		1515813																			1384457	1456120	1436924
1596977		1563907																			1384539	1456127	1436951
1555080		1520784																			1384657	1456371	1436983
1490736		1432641																			1384767	1456375	1436989
1516804		1326305																			1384775	1456394	1436990
1499595		1523700																			1384833	1456495	1437096
1477384		1490787																			1384994	1456501	1437097
1543283		1463895																			1385014	1456514	1437098
1538263		1446763																			1385030	1456528	1437186
1498381		1494268																			1385035	1456582	1437402
1347260		1495306																			1385076	1456584	1437508
1468346		1589857																			1385235	1456589	1437524
1533943		1535577																			1385460	1456594	1437536
1541309		1595114																			1385627	1456603	1437632
1469352		1346523																			1385661	1456606	1437912
1505298		1504248																			1385726	1456609	1437953
1144134		1323213																			1385863	1456612	1438239
1549499		1506031																			1385881	1456622	1438242
1516403		1460204																			1385889	1456624	1438299
1470027		1501025																			1385957	1456627	1438556
1516139		1481607																			1386076	1456699	1438575
1373618		1544870																			1386150	1456858	1438626
1457107		1499364																			1386197	1456862	1438778
1489870		1564720																			1386239	1456873	1438818
1479948		1303736																			1386241	1456931	1438819
1533916		1470806																			1386343	1456955	1438893
1536150		1384007																			1386412	1456973	1438967
1441218		1502470																			1386453	1457096	1439446
1455299		1482453																			1386462	1457236	1439480
1461755		1559769																			1386490	1457249	1439696
1523996		1541114																			1386575	1457263	1439717
1509823		1471793																			1386661	1457367	1440035
1496982		1469749																			1386746	1457381	1440051
1385030		1486552																			1386749	1457441	1440215
1469624		1555551																			1386776	1457505	1440232
1525938		1549867																			1386854	1457537	1440258
1508167		1519340																			1386918	1457570	1440283
1510886		1468929																			1386950	1457591	1440349
1359117		1335674																			1387063	1457627	1440355
1523144		1523903																			1387210	1457722	1440417
1465240		1509223																			1387290	1457836	1440461
1472724		1504044																			1387299	1457928	1440720
1334600		1492209																			1387305	1457964	1440730
1599618		1350683																			1387328	1457987	1440936
1552420		1536723																			1387352	1458022	1440991
1457102		1498052																			1387399	1458054	1441051
1457700		1485471																			1387547	1458093	1441086
1061866		1498246																			1387587	1458175	1441107
1536065		1534771																			1387697	1458302	1441108
1473065		1497406																			1387838	1458306	1441109
1454618		1539496																			1387974	1458415	1441218
1466053		1488681																			1388014	1458457	1441240
1448453		1542796																			1388043	1458464	1441267
1396117		1506138																			1388116	1458539	1441298
1533575		1492344																			1388255	1458605	1441302
1566063		1507069																			1388400	1458619	1441385
1469208		1460633																			1388447	1458631	1441499
1594000		1551615																			1388510	1458634	1441528
1377941		1565371																			1388684	1458659	1441536
1412731		1508028																			1388816	1458664	1441765
1349083		1153542																			1388821	1458725	1441781
1341498		1352156																			1388883	1458727	1441939
1512527		1517486																			1388972	1458748	1441975
1490244		1491583																			1389313	1458754	1442026
1534504		1469848																			1389354	1458787	1442389
1578714		1489161																			1389450	1458814	1442415
1457119		1376476																			1389517	1458852	1442516
1504691		1527743																			1389541	1458911	1442569
1378100		1549803																			1389618	1459025	1442637
1377806		1323491																			1389636	1459031	1442756
1593501		1532369																			1389670	1459131	1442955
1505399		1566519																			1389679	1459199	1443041
1327299		1465994																			1389831	1459227	1443112
1517699		1557921																			1389865	1459285	1443180
1366687		1458787																			1389923	1459297	1443258
1523712		1490560																			1390052	1459338	1443312
1566725		1546913																			1390055	1459350	1443421
1508224		1321812																			1390197	1459363	1443688
1484590		1454182																			1390214	1459364	1443718
1520255		1547048																			1390225	1459411	1443869
1152884		1552100																			1390373	1459427	1443898
1575436		1494029																			1390474	1459429	1443918
1358140		1480919																			1390506	1459498	1443977
1116047		1364309																			1390517	1459582	1443987
1015056		1539816																			1390582	1459611	1443996
1365502		1410737																			1390652	1459618	1444006
1517295		1545756																			1390733	1459746	1444115
1597263		1502487																			1390768	1459760	1444198
1480113		1557426																			1390810	1459775	1444289
1494336		1478813																			1390831	1459789	1444433
1390652		1507010																			1391043	1459818	1444474
1474008		1524636																			1391099	1459823	1444672
1535864		1494432																			1391159	1459874	1444686
1319968		1552564																			1391229	1459886	1444690
1500312		1392216																			1391247	1459906	1444784
1352372		1469947																			1391253	1459993	1444875
1390768		1596687																			1391276	1460082	1444915
1494920		1446778																			1391285	1460103	1445068
1450323		1152264																			1391444	1460204	1445460
1442994		1546754																			1391507	1460272	1445584
1518532		1462442																			1391565	1460277	1445664
1324426		1491188																			1391698	1460357	1445668
1452939		1515090																			1391804	1460368	1445688
1534357		1444929																			1391810	1460370	1445830
1556703		1453132																			1391899	1460383	1445863
1532518		1392552																			1391973	1460392	1445977
1519586		1492222																			1391998	1460397	1446058
1457033		1584359																			1392018	1460410	1446190
1376699		1361193																			1392067	1460458	1446221
1486915		1498798																			1392103	1460475	1446773
1379970		1530547																			1392195	1460595	1446798
1482333		1362057																			1392237	1460610	1446850
1447950		1513531																			1392278	1460621	1446869
1519912		1533700																			1392316	1460628	1447048
1584923		1506562																			1392327	1460633	1447062
1552111		1513904																			1392386	1460729	1447070
1508020		1478980																			1392593	1460742	1447098
1455318		1503243																			1392687	1460748	1447111
1378081		1526830																			1392716	1460753	1447116
1530811		1340604																			1392772	1460907	1447187
1372134		1478780																			1392814	1461029	1447199
1526143		1567970																			1392826	1461052	1447257
1496831		1467549																			1392856	1461072	1447301
1347812		1500809																			1392894	1461079	1447337
1453008		1468087																			1392990	1461112	1447377
1476915		1478363																			1392991	1461124	1447385
1537999		1509616																			1393096	1461199	1447416
1557000		1556695																			1393292	1461290	1447522
1577337		1118177																			1393315	1461302	1447672
1389865		1532147																			1393405	1461336	1447710
1448191		1380598																			1393442	1461375	1447800
1485215		1597902																			1393483	1461511	1447864
1554333		1524147																			1393696	1461517	1447953
1489172		1546840																			1393736	1461558	1448050
1176600		1507384																			1393913	1461561	1448239
1505838		1579346																			1393965	1461576	1448306
1587078		1372566																			1394066	1461648	1448319
1537462		1533801																			1394110	1461798	1448433
1533932		1487669																			1394114	1461828	1448500
1457453		1521783																			1394117	1461840	1448542
1388684		1568087																			1394233	1461935	1448553
1468260		1089537																			1394253	1461956	1448558
1325435		1387164																			1394291	1462061	1448561
1363300		1491431																			1394330	1462074	1448691
1446075		1473818																			1394386	1462103	1448695
1539798		1512179																			1394464	1462131	1448960
1549544		1545967																			1394626	1462137	1448966
1386453		1462617																			1394652	1462183	1449300
1487804		1129112																			1394932	1462341	1449373
1372550		1474249																			1395063	1462423	1449377
1391804		1474441																			1395147	1462442	1449492
1600632		1539098																			1395154	1462485	1449526
1568082		1518142																			1395234	1462617	1449603
1456020		1512764																			1395292	1462738	1449773
1522048		1517350																			1395496	1462823	1449839
1463491		1497047																			1395537	1462919	1449897
1537817		1457539																			1395561	1462957	1450000
1476301		1535478																			1395579	1462991	1450080
1391043		1555884																			1395610	1463006	1450293
1565943		1470073																			1395629	1463022	1450409
1544457		1522478																			1395723	1463117	1450445
1346466		1510146																			1395733	1463208	1450446
1508554		1465817																			1395834	1463211	1450619
1383483		1503140																			1395857	1463224	1450884
1470520		1478324																			1395861	1463336	1450926
1542425		1512912																			1395884	1463338	1451008
1537144		1499826																			1395916	1463345	1451075
1444133		1459031																			1396018	1463347	1451108
1351920		1532163																			1396117	1463385	1451197
1557448		1464633																			1396139	1463463	1451236
1536371		1534908																			1396163	1463557	1451317
1530118		1549701																			1396194	1463582	1451490
1544353		1501781																			1396264	1463699	1451598
1538080		1556669																			1396433	1463755	1451663
1472727		1363943																			1396438	1463775	1451685
1596286		1477425																			1396454	1463790	1451816
1373922		1320004																			1396455	1463802	1451960
1480695		1503358																			1396611	1463806	1451974
1456576		1534261																			1396706	1463849	1452068
1367844		1579262																			1407259	1463877	1452154
1357279		1486351																			1407491	1463879	1452174
1585644		1470271																			1407791	1463895	1452183
1601518		1365813																			1407819	1463950	1452238
1454281		1521613																			1408309	1463951	1452310
1474686		1498967																			1409085	1464175	1452401
1480992		1512080																			1409111	1464200	1452543
1488672		1599753																			1409218	1464215	1452545
1172053		1361179																			1409690	1464312	1452573
1528165		1596274																			1409830	1464326	1452612
1475859		1480592																			1410353	1464327	1452919
1470338		1533407																			1410380	1464352	1452990
1350091		1568122																			1410471	1464356	1453096
1474423		1542937																			1410577	1464386	1453209
1488549		1551809																			1410655	1464498	1453224
1377103		1528118																			1410782	1464505	1453334
1540670		1479266																			1410938	1464522	1453350
1533294		1586774																			1411049	1464539	1453468
1452591		1500174																			1411219	1464620	1453476
1556474		1536395																			1411258	1464628	1453573
1476551		1357575																			1411485	1464633	1453642
1486987		1523127																			1411709	1464650	1453704
1481704		1530662																			1411741	1464744	1453813
1596305		1158964																			1411847	1464812	1453817
1506137		1543830																			1412116	1464925	1453854
1545368		1540946																			1412674	1464941	1453888
1510003		1473560																			1412731	1465088	1453925
1367862		1389798																			1413418	1465093	1454034
1502125		1458457																			1413485	1465100	1454082
1503858		1382431																			1414357	1465130	1454108
1326131		1484409																			1414394	1465166	1454119
1546338		1511477																			1414621	1465228	1454224
1489672		1519988																			1415883	1465255	1454269
1496515		1476804																			1416378	1465341	1454283
1350651		1549940																			1416449	1465344	1454403
1508544		1496962																			1416601	1465353	1454566
1490368		1501606																			1416742	1465355	1454615
1487538		1539878																			1416796	1465387	1454781
1370719		1475350																			1417175	1465559	1454788
1358824		1503343																			1417931	1465636	1454809
1455676		1506036																			1417950	1465711	1454925
1601631		1547199																			1418025	1465714	1454973
1525275		1526613																			1418051	1465817	1455020
1487265		1379197																			1429877	1465833	1455029
1465569		1459131																			1430338	1465840	1455037
1543640		1466785																			1430811	1465848	1455102
1372410		1326694																			1430967	1465898	1455179
1379809		1335983																			1431171	1465946	1455182
1456599		1355321																			1431177	1465968	1455216
1511829		1563346																			1431310	1465980	1455264
1465736		1547211																			1431341	1465994	1455283
1395496		1503808																			1431886	1466015	1455331
1587470		1467119																			1431978	1466017	1455404
1466162		1499204																			1432167	1466031	1455495
1535605		1368387																			1432453	1466041	1455506
1539157		1526113																			1432825	1466198	1455657
1375711		1358830																			1432980	1466272	1455688
1511764		1515715																			1433203	1466340	1455768
1448407		1519910																			1433212	1466371	1455782
1512098		1518576																			1433443	1466403	1455798
1523916		1053451																			1433625	1466411	1455826
1468290		1482791																			1434243	1466463	1455852
1490916		1461840																			1434513	1466470	1455901
1496199		1128474																			1434564	1466473	1455908
1455331		1505672																			1434808	1466482	1455988
1579641		1461072																			1435031	1466527	1456033
1388883		1489129																			1435136	1466541	1456246
1476868		1462183																			1435320	1466543	1456259
1511347		1550833																			1435482	1466549	1456302
1456497		1479246																			1435721	1466588	1456509
1327071		1380419																			1435842	1466597	1456539
1488663		1439783																			1435913	1466743	1456553
1536729		1460397																			1436161	1466758	1456574
1514329		1353459																			1436344	1466776	1456647
1593045		1106253																			1436483	1466785	1456656
1586997		1435987																			1436628	1466808	1456728
1589282		1515724																			1437129	1466816	1456855
1560762		1519815																			1437232	1466820	1456861
1447522		1540454																			1437432	1466826	1456899
1452310		1598942																			1437683	1466878	1456909
1476547		1363054																			1437783	1466895	1456983
1459378		1510547																			1437947	1466963	1456995
1534217		1525142																			1437973	1467033	1457004
1494799		1520062																			1437982	1467079	1457019
1369688		1503830																			1438082	1467081	1457070
1519360		1491223																			1438176	1467102	1457081
1555165		1530220																			1438416	1467105	1457122
1376269		1446638																			1438826	1467115	1457194
1484970		1436003																			1438865	1467119	1457407
1508011		1525295																			1438866	1467142	1457451
1523754		1530791																			1438879	1467320	1457460
1473442		1534004																			1439461	1467323	1457469
1540586		1459190																			1439679	1467472	1457539
1032352		1513261																			1439813	1467478	1457696
1474215		1480879																			1439908	1467494	1457703
1549515		1468886																			1439925	1467502	1457749
1377712		1347705																			1440052	1467507	1457802
1453663		1459611																			1440217	1467549	1457829
1552372		1523042																			1440856	1467556	1457878
1483648		1494501																			1441129	1467647	1457889
1544699		1520479																			1441627	1467678	1457898
1544162		1475924																			1441683	1467686	1457906
1461633		1384074																			1441725	1467740	1457970
1514164		1467678																			1442309	1467754	1458014
1500164		1452288																			1442351	1467865	1458040
1511540		1480088																			1442407	1468017	1458047
1486008		1501689																			1442409	1468027	1458051
1534363		1509288																			1442563	1468031	1458106
1381016		1456584																			1442589	1468050	1458161
1540362		1529864																			1442612	1468053	1458164
1544317		1474781																			1442676	1468060	1458331
1513893		1534463																			1442722	1468066	1458400
1352145		1533414																			1442768	1468087	1458421
1480783		1585612																			1442916	1468258	1458453
1520899		1377358																			1442942	1468343	1458474
1484609		1599721																			1442967	1468445	1458642
1358145		1343642																			1442994	1468499	1458666
1519581		1482372																			1443004	1468502	1458732
1503785		1338466																			1443092	1468507	1458761
1475445		1473174																			1443103	1468593	1458805
1451908		1468343																			1443186	1468639	1458951
1503560		1513652																			1443303	1468650	1458963
1507170		1538148																			1443321	1468674	1459175
1325974		1513095																			1443495	1468830	1459181
1547028		1488944																			1443685	1468868	1459190
1395834		1481877																			1443725	1468886	1459207
1442409		1552914																			1443749	1468915	1459213
1029637		1481969																			1443791	1468920	1459333
1448945		1433155																			1443806	1468924	1459559
1520159		1456514																			1443812	1468929	1459560
1487853		1557369																			1443910	1468936	1459615
1526436		1569558																			1443968	1468942	1459633
1597965		1341313																			1444133	1468947	1459635
1485923		1586808																			1444183	1469013	1459642
1467380		1463336																			1444228	1469018	1459735
1488995		1496473																			1444287	1469038	1459745
1551716		1468942																			1444314	1469075	1459750
1477078		1565926																			1444358	1469315	1459867
1453248		1475614																			1444359	1469317	1459889
1537591		1550946																			1444450	1469384	1459896
1596865		1534393																			1444527	1469542	1459909
1461395		1525601																			1444712	1469614	1459913
1467007		1454737																			1444752	1469642	1459924
1362520		1529199																			1444803	1469749	1460076
1538061		1481879																			1444928	1469848	1460088
1505412		1536877																			1445047	1469863	1460092
1549305		1477485																			1445105	1469871	1460150
1507905		1504694																			1445276	1469921	1460184
1514283		1460595																			1445338	1469926	1460245
1560228		1455014																			1445357	1469947	1460257
1363237		1482594																			1445386	1469958	1460269
1476510		1438486																			1445399	1470026	1460287
1473180		1450601																			1445422	1470073	1460443
1455193		1542223																			1445525	1470085	1460478
1348871		1379840																			1445686	1470152	1460500
1520079		1489139																			1445692	1470163	1460552
1453614		1455204																			1445711	1470178	1460598
1362288		1499162																			1445789	1470187	1460654
1348965		1445552																			1445903	1470195	1460671
1548377		1514461																			1445938	1470203	1460707
1456510		1459297																			1445953	1470271	1460859
1529836		1528823																			1446075	1470354	1460869
1496896		1492451																			1446091	1470356	1460886
1529614		1535810																			1446136	1470378	1460900
1522260		1508743																			1446156	1470490	1460974
1533305		1368451																			1446167	1470743	1461000
1510844		1467142																			1446172	1470801	1461014
1596547		1548062																			1446176	1470806	1461043
1349062		1495792																			1446213	1470825	1461074
1515220		1500888																			1446232	1470833	1461086
1552255		1478969																			1446249	1470940	1461197
1507609		1520511																			1446319	1470957	1461274
1549264		1513889																			1446329	1471094	1461343
1416378		1374157																			1446346	1471100	1461411
1446850		1517029																			1446347	1471105	1461638
1595512		1537987																			1446434	1471125	1461839
1508685		1370182																			1446491	1471155	1461854
1525053		1548303																			1446501	1471230	1461876
1359682		1540848																			1446565	1471307	1461945
1410938		1457096																			1446575	1471313	1462050
1468356		1377855																			1446595	1471474	1462087
1495925		1584118																			1446621	1471537	1462097
1470515		1520014																			1446665	1471652	1462152
1575623		1348452																			1446754	1471653	1462229
1586212		1354038																			1446755	1471694	1462233
1510043		1499522																			1446993	1471701	1462295
1518196		1590915																			1447080	1471729	1462315
1472698		1432579																			1447092	1471793	1462567
1501966		1600367																			1447121	1471822	1462641
1483241		1453482																			1447255	1471833	1462743
1524249		1517144																			1447272	1471942	1462789
1482436		1509699																			1447312	1472085	1462829
1532423		1491175																			1447330	1472219	1463012
1453071		1502597																			1447345	1472443	1463100
1494781		1486638																			1447366	1472485	1463123
1507941		1381695																			1447387	1472491	1463166
1387974		1542610																			1447512	1472582	1463197
1543334		1343040																			1447536	1472588	1463387
1334985		1499870																			1447584	1472596	1463411
1576673		1464010																			1447730	1472605	1463465
1595034		1326522																			1447774	1472606	1463469
1501922		1517174																			1447828	1472651	1463474
1451021		1370208																			1447868	1472787	1463593
1466945		1509494																			1447902	1472825	1463696
1394233		1444037																			1447950	1472830	1463786
1493422		1594502																			1447956	1472850	1464002
1528319		1501953																			1448051	1472924	1464005
1041319		1483176																			1448073	1472930	1464010
1477157		1329483																			1448086	1473055	1464075
1531818		1597339																			1448092	1473169	1464184
1457334		1506787																			1448105	1473174	1464193
1502740		1384066																			1448109	1473331	1464328
1505529		1474387																			1448129	1473341	1464347
1503619		1162314																			1448143	1473464	1464479
1513712		1369800																			1448161	1473476	1464525
1368227		1455761																			1448191	1473520	1464674
1550490		1463802																			1448224	1473547	1464965
1492448		1561862																			1448244	1473555	1464978
1532187		1456955																			1448245	1473560	1465104
1514839		1518994																			1448367	1473606	1465199
1483918		1452978																			1448381	1473647	1465206
1436628		1539565																			1448407	1473650	1465221
1458792		1491206																			1448453	1473711	1465226
1396706		1514297																			1448552	1473732	1465340
1504306		1342711																			1448560	1473789	1465369
1504602		1554798																			1448693	1473818	1465389
1366113		1487273																			1448763	1473832	1465396
1593240		1464200																			1448895	1473869	1465417
1461490		1336014																			1448896	1473880	1465544
1457599		1475623																			1448945	1473979	1465728
1456382		1495150																			1449027	1474119	1465836
1555327		1432037																			1449029	1474126	1465957
1592110		1553370																			1449048	1474136	1466144
1491676		1548496																			1449220	1474160	1466150
1488461		1562197																			1449292	1474227	1466322
1375147		1545304																			1449386	1474249	1466346
1352963		1533226																			1449495	1474373	1466476
1356380		1461336																			1449510	1474403	1466532
1456379		1476756																			1449548	1474441	1466653
1381090		1541162																			1449619	1474496	1466685
1530921		1530364																			1449623	1474735	1466753
1490392		1543401																			1449798	1474747	1466789
1468849		1443041																			1449949	1474755	1466830
1386241		1520475																			1449979	1474767	1466840
1319860		1456983																			1450008	1474771	1466940
1502298		1499189																			1450169	1474781	1467151
1485282		1509580																			1450179	1474846	1467195
1592979		1064468																			1450323	1474872	1467206
1356753		1545472																			1450353	1474878	1467211
1468968		1585888																			1450394	1474944	1467240
1523307		1448965																			1450516	1474946	1467259
1532635		1339657																			1450618	1474953	1467330
1464949		1498959																			1450682	1474962	1467338
1443806		1444467																			1450694	1475336	1467340
1366756		1453570																			1450769	1475342	1467407
1384157		1536851																			1450974	1475350	1467489
1497955		1471537																			1451021	1475598	1467614
1394110		1467507																			1451026	1475614	1467654
1601319		1546961																			1451110	1475623	1467697
1545819		1524238																			1451144	1475710	1467744
1562381		1493495																			1451158	1475717	1467745
1469935		1554937																			1451201	1475916	1467871
1555847		1480064																			1451206	1475924	1468077
1503770		1539476																			1451329	1475943	1468166
1518983		1515589																			1451355	1475999	1468211
1548996		1484195																			1451517	1476051	1468224
1537721		1417919																			1451532	1476101	1468246
1459184		1526841																			1451543	1476125	1468260
1508505		1165760																			1451546	1476168	1468320
1595243		1502606																			1451569	1476281	1468323
1523825		1506726																			1451592	1476298	1468336
1351582		1545524																			1451638	1476312	1468348
1475150		1493645																			1451656	1476377	1468399
1351740		1545099																			1451707	1476395	1468427
1528637		1597839																			1451738	1476439	1468513
1593223		1525312																			1451753	1476478	1468525
1541263		1363500																			1451754	1476484	1468536
1367223		1440527																			1451796	1476546	1468574
1411741		1468258																			1451817	1476619	1468647
1587789		1486926																			1451834	1476756	1468694
1506587		1523283																			1451843	1476804	1468702
1526584		1556499																			1451908	1476805	1468725
1597088		1506435																			1452029	1476808	1468821
1485863		1542591																			1452060	1476866	1468846
1488887		1485445																			1452110	1476892	1468922
1349610		1322880																			1452191	1476931	1468977
1529177		1519222																			1452228	1476934	1468982
1528331		1473880																			1452377	1476963	1468995
1324592		1476866																			1452460	1476979	1469045
1589968		1540822																			1452591	1477027	1469143
1542392		1601272																			1452614	1477034	1469217
1505401		1357544																			1452715	1477043	1469392
1474289		1525016																			1452728	1477069	1469493
1504439		1321481																			1452738	1477148	1469504
1365111		1460368																			1452803	1477264	1469539
1396194		1432764																			1452879	1477368	1469585
1547275		1513485																			1452939	1477391	1469639
1512416		1496003																			1452985	1477404	1469780
1059115		1468050																			1453008	1477425	1469828
1487793		1565273																			1453071	1477441	1469844
1461402		1526022																			1453076	1477485	1469851
1345849		1559980																			1453091	1477490	1470051
1497352		1510151																			1453124	1477565	1470086
1457816		1496792																			1453248	1477627	1470106
1479548		1411855																			1453269	1477741	1470255
1454548		1557935																			1453297	1477768	1470272
1534936		1508241																			1453357	1477816	1470274
1364563		1522660																			1453374	1477841	1470331
1549604		1524574																			1453474	1477875	1470392
1518454		1490373																			1453495	1477877	1470409
1484820		1536541																			1453499	1477934	1470443
1540333		1550317																			1453515	1477959	1470481
1336367		1456858																			1453569	1477972	1470732
1455227		1395163																			1453576	1477986	1470748
1519592		1476484																			1453614	1478082	1470803
1388116		1533794																			1453634	1478217	1470821
1437953		1491692																			1453663	1478245	1471007
1494030		1523782																			1453713	1478318	1471017
1551698		1474755																			1453722	1478363	1471032
1340641		1552209																			1453733	1478509	1471036
1448143		1466826																			1453744	1478733	1471126
1536870		1489878																			1453776	1478759	1471150
1590792		1459429																			1453933	1478782	1471209
1455764		1541460																			1453987	1478813	1471220
1506854		1549906																			1453992	1478932	1471349
1493192		1463006																			1453998	1478938	1471462
1383724		1598571																			1454005	1478958	1471551
1320654		1597959																			1454016	1478969	1471613
1460308		1463117																			1454092	1478980	1471660
1414621		1496838																			1454113	1479044	1471691
1550550		1387748																			1454122	1479218	1471700
1596525		1561927																			1454129	1479246	1471804
1582751		1520042																			1454137	1479266	1471970
1562935		1601333																			1454143	1479280	1471996
1456482		1507692																			1454192	1479358	1472001
1494637		1543410																			1454249	1479384	1472174
1515892		1547219																			1454265	1479391	1472407
1486398		1377489																			1454281	1479417	1472430
1394932		1469958																			1454398	1479505	1472441
1554288		1585857																			1454471	1479521	1472498
1376320		1539789																			1454548	1479543	1472535
1495103		1498356																			1454556	1479544	1472562
1452029		1541034																			1454587	1479574	1472568
1595795		1478245																			1454607	1479580	1472573
1513734		1473647																			1454618	1479602	1472610
1528841		1500009																			1454622	1479639	1472834
1479128		1533016																			1454657	1479670	1472916
1526513		1489483																			1454771	1479759	1472974
1466266		1472219																			1454779	1479771	1473092
1390105		1524566																			1454803	1479787	1473097
1483422		1517473																			1454879	1479802	1473180
1552665		1550250																			1454892	1479835	1473239
1536873		1548523																			1454930	1479933	1473258
1441683		1354411																			1454962	1479952	1473259
1535290		1545195																			1455023	1479957	1473374
1586480		1551425																			1455120	1479959	1473455
1506812		1546064																			1455193	1479982	1473536
1528472		1414632																			1455227	1479994	1473608
1458460		1461798																			1455232	1480064	1473644
1557153		1470178																			1455290	1480069	1473794
1531335		1531865																			1455299	1480088	1473837
1534221		1392577																			1455312	1480095	1473985
1483665		1444875																			1455318	1480123	1474022
1334980		1532779																			1455329	1480133	1474129
1326529		1469542																			1455340	1480140	1474143
1459280		1392095																			1455347	1480169	1474161
1582474		1599801																			1455360	1480201	1474204
1319340		1349300																			1455401	1480208	1474289
1359344		1593490																			1455497	1480256	1474293
1548721		1510087																			1455501	1480271	1474304
1546179		1464505																			1455517	1480314	1474356
1521186		1528826																			1455521	1480453	1474366
1595586		1342374																			1455582	1480556	1474371
1339505		1520087																			1455664	1480592	1474386
1513864		1552573																			1455676	1480645	1474387
1465679		1385353																			1455764	1480778	1474398
1557900		1369414																			1455797	1480797	1474436
1550913		1533977																			1455850	1480879	1474444
1532770		1512028																			1455994	1480894	1474504
1503128		1028062																			1456005	1480908	1474525
1470959		1507809																			1456020	1480913	1474590
1511399		1503213																			1456043	1480919	1474661
1385235		1493690																			1456131	1481061	1474740
1481165		1546937																			1456274	1481123	1474758
1373222		1544868																			1456299	1481172	1474763
1442351		1499410																			1456379	1481178	1474817
1450008		1525214																			1456382	1481195	1474819
1533687		1534353																			1456399	1481205	1474935
1597074		1538335																			1456482	1481253	1474983
1454879		1473464																			1456489	1481353	1475137
1537705		1510097																			1456497	1481432	1475142
1482916		1459411																			1456510	1481470	1475161
1591578		1170661																			1456576	1481539	1475205
1527299		1508412																			1456599	1481607	1475357
1385627		1528804																			1456632	1481679	1475395
1522867		1442540																			1456642	1481697	1475453
1476992		1364860																			1456718	1481868	1475454
1446249		1587039																			1456870	1481877	1475462
1515923		1510092																			1456920	1481879	1475573
1483557		1566443																			1456923	1481929	1475577
1469227		1453879																			1456947	1481933	1475589
1600960		1584109																			1457029	1481958	1475591
1462138		1544839																			1457033	1481969	1475742
1554855		1498940																			1457077	1482072	1475892
1365180		1474735																			1457102	1482099	1475906
1552635		1545059																			1457107	1482101	1475933
1460890		1598601																			1457119	1482139	1476173
1378752		1547059																			1457129	1482142	1476190
1530425		1496987																			1457138	1482282	1476283
1469826		1470743																			1457179	1482372	1476356
1374861		1378122																			1457293	1482594	1476364
1524788		1495676																			1457334	1482688	1476401
1030640		1498047																			1457357	1482725	1476407
1439461		1509420																			1457376	1482728	1476586
1454771		1351755																			1457384	1482738	1476653
1484053		1526681																			1457453	1482791	1476825
1371914		1470378																			1457466	1483016	1476883
1466518		1348032																			1457521	1483038	1476929
1595950		1493562																			1457528	1483066	1476992
1474672		1431826																			1457533	1483069	1477184
1577550		1377153																			1457561	1483176	1477242
1594929		1531069																			1457562	1483184	1477251
1546834		1468936																			1457564	1483265	1477261
1531515		1488348																			1457566	1483452	1477384
1140161		1583950																			1457599	1483482	1477477
1375585		1347359																			1457686	1483487	1477584
1472235		1467502																			1457700	1483493	1477615
1459153		1584864																			1457743	1483497	1477622
1462606		1520276																			1457797	1483511	1477751
1487284		1587528																			1457807	1483567	1477786
1291525		1527731																			1457816	1483593	1477790
1461009		1563312																			1457883	1483598	1477809
1325533		1497730																			1457903	1483768	1477831
1463601		1550311																			1458012	1483776	1477860
1510270		1567547																			1458100	1483787	1477962
1479258		1542472																			1458113	1483805	1478001
1489493		1556613																			1458152	1483902	1478118
1520136		1055668																			1458157	1483982	1478194
1509587		1463790																			1458170	1484017	1478210
1548320		1579918																			1458211	1484136	1478233
1527512		1493197																			1458460	1484195	1478242
1553987		1501861																			1458461	1484232	1478305
1494565		1460621																			1458542	1484257	1478311
1472422		1582767																			1458586	1484321	1478324
1390474		1453711																			1458592	1484339	1478347
1392525		1528353																			1458607	1484346	1478591
1365018		1388182																			1458615	1484351	1478594
1442589		1521869																			1458618	1484387	1478613
1444314		1447187																			1458626	1484409	1478622
1534741		1538436																			1458765	1484425	1478630
1507697		1489530																			1458792	1484432	1478677
1596437		1502503																			1458917	1484484	1478682
1390831		1448279																			1458934	1484504	1478761
1496847		1490625																			1459002	1484566	1478767
1518794		1544319																			1459009	1484652	1478780
1521094		1531023																			1459013	1484683	1478828
1596648		1442573																			1459039	1484737	1478832
1389618		1513565																			1459140	1484739	1478878
1501533		1373768																			1459153	1484816	1478924
1533263		1586659																			1459184	1484818	1478927
1389541		1546177																			1459189	1484936	1479123
1506181		1457381																			1459193	1485059	1479214
1481514		1410908																			1459204	1485224	1479225
1487342		1386443																			1459280	1485268	1479347
1497574		1507673																			1459294	1485344	1479352
1468879		1464941																			1459378	1485366	1479361
1482659		1524651																			1459389	1485385	1479379
1550499		1531245																			1459499	1485445	1479477
1445692		1514737																			1459510	1485446	1479485
1452460		1496167																			1459565	1485455	1479488
1357394		1500721																			1459652	1485471	1479540
1593413		1580342																			1459691	1485498	1479581
1385035		1536516																			1459783	1485518	1479587
1459691		1532156																			1459809	1485531	1479648
1457807		1487934																			1459902	1485583	1479716
1590298		1483787																			1460003	1485631	1479803
1355982		1448262																			1460102	1485656	1479808
1544807		1509553																			1460128	1485669	1479966
1515079		1516031																			1460142	1485752	1479977
1549646		1502638																			1460200	1485929	1480012
1346483		1079374																			1460235	1485936	1480020
1509309		1355173																			1460297	1486067	1480058
1363816		1464352																			1460308	1486068	1480113
1457561		1493740																			1460379	1486164	1480125
1534840		1515727																			1460415	1486181	1480155
1490728		1520285																			1460431	1486260	1480289
1556829		1494676																			1460446	1486264	1480297
1391899		1452026																			1460454	1486323	1480300
1465397		1522990																			1460464	1486335	1480324
1516145		1458014																			1460530	1486351	1480341
1499260		1446561																			1460641	1486463	1480348
1504178		1088334																			1460646	1486511	1480460
1586906		1596776																			1460659	1486552	1480478
1443725		1452401																			1460663	1486572	1480560
1545806		1443977																			1460702	1486638	1480579
1528296		1479485																			1460757	1486720	1480620
1068210		1394045																			1460890	1486866	1480659
1519199		1430337																			1460952	1486877	1480806
1543667		1484683																			1460957	1486926	1480816
1583069		1006783																			1461009	1486952	1480886
1556846		1554544																			1461049	1486980	1480971
1503008		1555852																			1461057	1486989	1481076
1466530		1574256																			1461068	1487070	1481114
1370356		1525238																			1461125	1487100	1481140
1472337		1499881																			1461143	1487255	1481298
1492669		1543930																			1461192	1487273	1481330
1446621		1476439																			1461193	1487293	1481426
1531752		1494762																			1461236	1487335	1481442
1554959		1528536																			1461324	1487360	1481527
1447312		1472085																			1461339	1487407	1481540
1528191		1467740																			1461394	1487419	1481660
1490477		1597879																			1461395	1487422	1481754
1518552		1527100																			1461402	1487426	1481794
1471900		1487485																			1461409	1487429	1481858
1477496		1515001																			1461420	1487478	1482055
1518294		1479574																			1461448	1487485	1482068
1542057		1475999																			1461449	1487511	1482164
1540144		1529426																			1461456	1487522	1482329
1510534		1479670																			1461467	1487529	1482346
1459809		1506643																			1461483	1487669	1482424
1521864		1480797																			1461490	1487682	1482432
1540940		1492197																			1461567	1487738	1482445
1506452		1599527																			1461571	1487776	1482453
1482376		1489658																			1461584	1487786	1482583
1465157		1477875																			1461625	1487915	1482591
1353724		1548336																			1461633	1487934	1482616
1366133		1498221																			1461671	1487976	1482714
1409085		1492038																			1461672	1488334	1482774
1538766		1372100																			1461684	1488348	1482775
1503601		1566282																			1461755	1488411	1482777
1570795		1483497																			1461781	1488474	1482808
1537784		1457878																			1461833	1488544	1482865
1475563		1557630																			1461850	1488557	1482866
1356532		1501856																			1461869	1488635	1483029
1584601		1492764																			1461943	1488643	1483072
1487262		1501024																			1461968	1488681	1483078
1519577		1489076																			1462044	1488691	1483122
1495836		1546618																			1462079	1488695	1483150
1477449		1477368																			1462138	1488702	1483159
1366857		1080791																			1462169	1488855	1483165
1029479		1474962																			1462238	1488860	1483337
1466322		1488334																			1462408	1488895	1483341
1351799		1470026																			1462414	1488944	1483346
1595186		1359571																			1462426	1488994	1483410
1379248		1095389																			1462573	1489076	1483433
1452803		1483184																			1462606	1489118	1483465
1467558		1053856																			1462629	1489129	1483550
1499495		1479417																			1462630	1489139	1483595
1498606		1489441																			1462773	1489161	1483783
1394652		1540187																			1462870	1489186	1483811
1462629		1459909																			1462983	1489285	1483887
1554103		1577111																			1463003	1489299	1483992
1447902		1599171																			1463013	1489389	1484020
1472681		1373733																			1463020	1489401	1484036
1381758		1496716																			1463096	1489413	1484068
1447116		1597111																			1463115	1489424	1484132
1462641		1433763																			1463130	1489441	1484159
1567917		1461290																			1463175	1489483	1484397
1491069		1326364																			1463177	1489486	1484473
1546442		1481353																			1463199	1489514	1484482
1350385		1495508																			1463294	1489541	1484487
1551092		1496877																			1463295	1489593	1484538
1532507		1498373																			1463314	1489601	1484539
1564058		1537232																			1463369	1489669	1484614
1530031		1476934																			1463394	1489712	1484786
1489466		1590000																			1463407	1489770	1484790
1498002		1560238																			1463491	1489813	1484992
1586864		1539225																			1463493	1489836	1485046
1526693		1455762																			1463501	1489857	1485071
1596028		1490714																			1463599	1489878	1485152
1460003		1561737																			1463601	1490047	1485333
1594858		1447301																			1463605	1490101	1485377
1333967		1522998																			1463710	1490156	1485379
1547018		1493979																			1463871	1490225	1485395
1491770		1522644																			1463888	1490261	1485411
1487968		1138061																			1463923	1490309	1485507
1511098		1389979																			1463924	1490342	1485588
1491777		1452957																			1463941	1490373	1485605
1582517		1481470																			1463983	1490375	1485611
1551388		1466411																			1463991	1490377	1485672
1493587		1538050																			1463999	1490378	1485676
1346268		1552459																			1464015	1490457	1485870
1478682		1380639																			1464183	1490469	1485898
1461192		1492515																			1464209	1490522	1485977
1479854		1454956																			1464285	1490560	1486060
1520228		1519253																			1464304	1490625	1486070
1528698		1494478																			1464336	1490639	1486090
1512668		1561808																			1464393	1490708	1486104
1527242		1494359																			1464414	1490711	1486127
1513001		1598614																			1464418	1490714	1486170
1571957		1536351																			1464428	1490787	1486457
1502578		1501795																			1464477	1490846	1486530
1474409		1552657																			1464509	1490923	1486545
1519794		1521389																			1464660	1490974	1486657
1536697		1502493																			1464661	1491090	1486713
1553732		1515657																			1464663	1491117	1486730
1549991		1334573																			1464670	1491168	1486738
1489737		1453742																			1464774	1491175	1486813
1357096		1585627																			1464797	1491188	1486894
1595137		1538895																			1464820	1491206	1486921
1452110		1489593																			1464828	1491223	1486934
1489851		1504297																			1464935	1491389	1486959
1505860		1503112																			1464949	1491404	1486975
1311981		1466543																			1465035	1491420	1487051
1458211		1557680																			1465101	1491431	1487055
1508248		1511238																			1465108	1491448	1487062
1515712		1512663																			1465138	1491466	1487108
1597821		1534524																			1465157	1491545	1487132
1370040		1508104																			1465208	1491583	1487205
1438416		1467556																			1465218	1491589	1487212
1508731		1349920																			1465233	1491597	1487235
1504756		1489401																			1465240	1491599	1487279
1515854		1512434																			1465308	1491617	1487351
1493910		1516408																			1465317	1491681	1487418
1354895		1548305																			1465320	1491692	1487459
1590398		1584410																			1465331	1491730	1487911
1344170		1360250																			1465337	1491760	1488008
1382285		1512467																			1465371	1491790	1488261
1494895		1492468																			1465376	1491813	1488372
1474860		1476892																			1465384	1492004	1488493
1552926		1582908																			1465397	1492020	1488653
1491636		1537758																			1465479	1492087	1488728
1494412		1582667																			1465482	1492174	1488731
1528476		1575237																			1465485	1492209	1488735
1465479		1485936																			1465504	1492222	1488743
1595757		1592399																			1465569	1492253	1488904
1373392		1463347																			1465573	1492288	1488939
1531626		1351436																			1465615	1492295	1488957
1392327		1540649																			1465656	1492330	1489165
1461125		1550851																			1465679	1492344	1489201
1448763		1512677																			1465708	1492451	1489205
1502016		1509426																			1465721	1492468	1489301
1480706		1503820																			1465731	1492515	1489326
1522434		1538321																			1465736	1492609	1489342
1534834		1505111																			1465738	1492702	1489388
1390517		1467115																			1465853	1492706	1489427
1490508		1470825																			1465858	1492716	1489490
1497042		1508401																			1465869	1492742	1489505
1471988		1498225																			1465870	1492764	1489530
1507419		1499042																			1465892	1492890	1489588
1467539		1561039																			1465948	1492904	1489658
1468972		1364625																			1466008	1492996	1489662
1557467		1539312																			1466053	1493059	1489663
1489534		1494364																			1466056	1493143	1489677
1599758		1557120																			1466081	1493197	1489682
1511194		1532879																			1466161	1493368	1489832
1488520		1396025																			1466162	1493384	1489835
1588108		1596585																			1466174	1493455	1489950
1503961		1549996																			1466190	1493495	1489956
1456947		1368755																			1466194	1493566	1490056
1476540		1541465																			1466266	1493575	1490094
1524729		1409043																			1466334	1493623	1490106
1552877		1516704																			1466356	1493645	1490135
1475239		1452006																			1466364	1493670	1490198
1481053		1475916																			1466382	1493673	1490200
1537445		1498051																			1466397	1493690	1490215
1525458		1496393																			1466398	1493695	1490330
1393442		1514391																			1466422	1493740	1490352
1522539		1473055																			1466518	1493745	1490356
1570595		1556994																			1466522	1493762	1490365
1391247		1496228																			1466530	1493764	1490434
1475228		1521443																			1466557	1493821	1490448
1351971		1551499																			1466586	1493826	1490463
1395733		1531798																			1466604	1493931	1490470
1460530		1511903																			1466795	1493939	1490516
1451592		1500129																			1466834	1493979	1490540
1461343		1503636																			1466916	1494018	1490548
1489280		1503237																			1466945	1494029	1490649
1357504		1587822																			1467007	1494084	1490705
1509213		1323604																			1467026	1494146	1490736
1473161		1464812																			1467110	1494161	1490927
1510157		1489118																			1467111	1494230	1490932
1511524		1511602																			1467132	1494247	1490990
1396163		1531804																			1467188	1494253	1491063
1475255		1481539																			1467304	1494268	1491192
1526624		1515196																			1467309	1494314	1491202
1362225		1539711																			1467316	1494316	1491435
1391099		1561991																			1467345	1494320	1491552
1547090		1458634																			1467350	1494359	1491632
1498689		1538775																			1467353	1494364	1491676
1494052		1448239																			1467378	1494420	1491684
1591989		1488994																			1467380	1494428	1491721
1506460		1534594																			1467419	1494432	1491743
1467693		1491420																			1467427	1494462	1491759
1465731		1384491																			1467506	1494501	1491763
1557277		1549816																			1467536	1494635	1491801
1461672		1441637																			1467539	1494676	1492001
1557398		1355113																			1467558	1494703	1492014
1456632		1354930																			1467657	1494762	1492038
1508237		1477768																			1467688	1494814	1492193
1478086		1458302																			1467693	1494823	1492197
1513628		1519792																			1467759	1494830	1492208
1374601		1385755																			1467875	1494833	1492280
1509711		1458748																			1467960	1494836	1492301
1388337		1130616																			1468096	1494884	1492321
1345670		1494428																			1468170	1494966	1492326
1506373		1584900																			1468184	1494988	1492403
1487336		1473794																			1468191	1495030	1492658
1532242		1487529																			1468199	1495150	1492666
1541014		1074697																			1468220	1495241	1492719
1488761		1496215																			1468263	1495271	1492727
1525960		1107076																			1468290	1495281	1492774
1362638		1494420																			1468346	1495297	1492917
1516331		1557395																			1468356	1495306	1492975
1470767		1378276																			1468406	1495322	1492992
1490130		1472588																			1468417	1495477	1492999
1506604		1466776																			1468423	1495494	1493050
1389670		1456973																			1468448	1495508	1493053
1454005		1561007																			1468589	1495543	1493158
1447828		1532343																			1468637	1495588	1493184
1520795		1364659																			1468705	1495792	1493281
1357266		1349346																			1468730	1495824	1493459
1328601		1592222																			1468741	1495980	1493463
1493955		1535893																			1468748	1496003	1493481
1547878		1517258																			1468749	1496105	1493509
1543084		1528995																			1468763	1496113	1493562
1390582		1376807																			1468849	1496121	1493582
1411847		1529143																			1468873	1496215	1493587
1349257		1389761																			1468879	1496228	1493594
1531951		1527131																			1468907	1496232	1493630
1472659		1330732																			1468964	1496373	1493649
1449048		1565792																			1468968	1496393	1493861
1597699		1487293																			1468972	1496417	1493919
1521047		1589649																			1469070	1496428	1494054
1347570		1360481																			1469072	1496432	1494083
1557351		1529859																			1469160	1496500	1494119
1120711		1522030																			1469161	1496502	1494150
1593168		1600525																			1469197	1496512	1494212
1346179		1481205																			1469208	1496560	1494239
1509260		1413923																			1469221	1496668	1494411
1386412		1458814																			1469227	1496694	1494438
1456656		1474767																			1469302	1496706	1494442
1457293		1496428																			1469352	1496716	1494478
1484963		1547377																			1469359	1496749	1494550
1388043		1465093																			1469364	1496792	1494628
1532256		1363003																			1469527	1496838	1494672
1357753		1558884																			1469537	1496877	1494688
1473523		1359553																			1469599	1496886	1494699
1520052		1566976																			1469624	1496940	1494733
1359889		1500614																			1469656	1496950	1494771
1524599		1487429																			1469809	1496962	1494868
1382672		1543432																			1469826	1496991	1494878
1550104		1537483																			1469869	1497041	1494895
1570432		1502870																			1469931	1497047	1495022
1457460		1468830																			1469935	1497153	1495086
1496324		1035320																			1470027	1497189	1495163
1489956		1597924																			1470048	1497217	1495179
1535316		1463224																			1470240	1497231	1495236
1499023		1538769																			1470251	1497243	1495239
1137336		1502080																			1470277	1497276	1495255
1450394		1534495																			1470338	1497372	1495262
1590996		1525756																			1470357	1497406	1495317
1556763		1597086																			1470386	1497461	1495397
1511544		1484739																			1470431	1497476	1495491
1535789		1549569																			1470437	1497484	1495498
1467688		1504295																			1470497	1497505	1495551
1516150		1417689																			1470515	1497581	1495576
1488441		1036529																			1470520	1497653	1495578
1555346		1530634																			1470620	1497670	1495592
1535783		1539724																			1470767	1497730	1495656
1548815		1549737																			1470783	1497731	1495667
1367207		1510284																			1470959	1497897	1495676
1367679		1537030																			1471012	1497946	1495705
1463130		1553933																			1471074	1497996	1495801
1591077		1593559																			1471082	1498047	1495820
1529084		1517120																			1471086	1498051	1495827
1479178		1538935																			1471158	1498052	1495842
1556825		1532554																			1471195	1498158	1495873
1359587		1522951																			1471210	1498214	1495875
1554112		1484351																			1471233	1498221	1495914
1528714		1550434																			1471320	1498225	1495930
1513557		1374170																			1471333	1498246	1495974
1593519		1557274																			1471342	1498328	1496083
1532434		1600912																			1471373	1498356	1496098
1141588		1534289																			1471459	1498373	1496167
1537036		1465636																			1471531	1498425	1496180
1543620		1493143																			1471543	1498434	1496240
1599288		1466340																			1471544	1498488	1496411
1503848		1473650																			1471575	1498493	1496473
1356478		1457627																			1471717	1498610	1496490
1365006		1566336																			1471814	1498659	1496509
1497021		1595358																			1471817	1498671	1496515
1476275		1395134																			1471831	1498713	1496534
1539852		1142553																			1471849	1498798	1496550
1528351		1455413																			1471857	1498868	1496578
1365250		1487419																			1471890	1498873	1496594
1473738		1515838																			1471900	1498893	1496653
1493298		1538086																			1471963	1498904	1496657
1518160		1465100																			1471964	1498920	1496782
1537552		1338377																			1471988	1498940	1496987
1546216		1552700																			1471990	1498945	1497199
1161729		1481442																			1472017	1498959	1497286
1585126		1552708																			1472060	1498967	1497458
1549534		1498488																			1472194	1499013	1497469
1488326		1339501																			1472229	1499016	1497586
1545795		1364817																			1472235	1499042	1497590
1377842		1537699																			1472258	1499159	1497733
1479203		1555123																			1472267	1499162	1498041
1379047		1454125																			1472337	1499189	1498045
1506327		1463775																			1472378	1499204	1498087
1543622		1524158																			1472387	1499207	1498099
1508859		1507078																			1472410	1499258	1498168
1533714		1585522																			1472422	1499283	1498183
1571951		1458051																			1472558	1499290	1498211
1126324		1446378																			1472615	1499362	1498325
1363444		1491730																			1472618	1499364	1498601
1468220		1546320																			1472659	1499404	1498794
1538657		1526019																			1472681	1499410	1498889
1377156		1355971																			1472690	1499434	1499004
1392856		1559481																			1472698	1499522	1499181
1588316		1504188																			1472724	1499526	1499344
1592288		1490377																			1472727	1499536	1499436
1536314		1473711																			1472783	1499565	1499540
1537005		1471007																			1472920	1499567	1499595
1539894		1521542																			1472995	1499609	1499652
1486670		1501215																			1472998	1499656	1499736
1493756		1544770																			1473004	1499666	1499887
1599792		1526283																			1473020	1499754	1499893
1535063		1516468																			1473027	1499826	1499901
1587567		1563685																			1473028	1499830	1499973
1350043		1365504																			1473061	1499840	1499986
1498084		1330758																			1473065	1499850	1500000
1378841		1533987																			1473157	1499870	1500005
1517075		1498168																			1473161	1499874	1500093
1457528		1575428																			1473219	1499881	1500100
1383759		1366549																			1473228	1499896	1500185
1568065		1519611																			1473244	1500009	1500263
1529691		1580981																			1473364	1500024	1500314
1512522		1525626																			1473371	1500129	1500378
1467188		1539820																			1473376	1500133	1500572
1552253		1460103																			1473385	1500174	1500605
1447121		1535416																			1473416	1500273	1500621
1538864		1492716																			1473419	1500307	1500638
1358715		1370793																			1473442	1500319	1500664
1484801		1516121																			1473523	1500385	1500668
1375698		1552664																			1473532	1500453	1500705
1461448		1391816																			1473564	1500477	1501033
1509123		1542413																			1473620	1500594	1501037
1490470		1579035																			1473635	1500601	1501069
1090429		1552589																			1473727	1500614	1501073
1493019		1522407																			1473738	1500721	1501164
1556487		1544989																			1473780	1500804	1501310
1461411		1574255																			1473810	1500809	1501323
1562057		1464498																			1473889	1500814	1501425
1471890		1376222																			1473898	1500821	1501432
1341530		1529591																			1473944	1500825	1501465
1497644		1452112																			1473983	1500876	1501470
1481463		1519048																			1473992	1500888	1501705
1524865		1502260																			1474008	1501024	1501798
1552246		1550320																			1474014	1501025	1501816
1531510		1510406																			1474016	1501036	1501936
1532048		1468053																			1474024	1501186	1501939
1487441		1456861																			1474213	1501215	1502046
1501312		1519092																			1474215	1501269	1502128
1462870		1437718																			1474222	1501272	1502130
1514118		1521440																			1474264	1501350	1502141
1469072		1375001																			1474382	1501354	1502154
1483794		1520756																			1474406	1501606	1502157
1477137		1027173																			1474409	1501640	1502177
1594373		1494230																			1474418	1501647	1502245
1553539		1536931																			1474423	1501689	1502263
1464774		1467211																			1474498	1501715	1502274
1480448		1535140																			1474507	1501776	1502296
1353121		1374041																			1474509	1501781	1502311
1463407		1498158																			1474578	1501795	1502444
1110517		1476377																			1474587	1501814	1502475
1534994		1542987																			1474666	1501822	1502503
1492242		1443258																			1474672	1501848	1502569
1525012		1530347																			1474686	1501856	1502623
1351144		1552904																			1474690	1501861	1502728
1496522		1464326																			1474860	1501953	1502848
1529719		1536417																			1474926	1502034	1502879
1381061		1508246																			1474933	1502039	1502912
1511890		1494018																			1475150	1502077	1503086
1599415		1550041																			1475199	1502080	1503108
1492227		1568382																			1475228	1502090	1503338
1539712		1495477																			1475239	1502144	1503370
1356314		1499290																			1475249	1502240	1503440
1515241		1084554																			1475255	1502260	1503472
1594440		1493695																			1475329	1502272	1503502
1454607		1457964																			1475425	1502350	1503508
1377456		1552713																			1475433	1502470	1503536
1388972		1459906																			1475445	1502484	1503604
1601124		1545185																			1475449	1502487	1503765
1479540		1462341																			1475458	1502493	1503789
1544569		1499536																			1475563	1502495	1503933
1364923		1376440																			1475642	1502597	1503936
1477151		1466758																			1475730	1502606	1503944
1592848		1438131																			1475750	1502638	1504003
1523152		1513498																			1475834	1502870	1504008
1495122		1159212																			1475859	1502892	1504078
1384104		1510839																			1475866	1502908	1504088
1468749		1580646																			1475875	1503047	1504096
1546727		1376994																			1475880	1503067	1504105
1521237		1525494																			1475897	1503098	1504109
1541958		1556564																			1475956	1503112	1504197
1594575		1599794																			1476013	1503140	1504225
1541708		1482099																			1476093	1503192	1504232
1472017		1494814																			1476110	1503213	1504269
1526937		1551422																			1476131	1503223	1504444
1544059		1448200																			1476147	1503235	1504499
1496176		1589759																			1476152	1503237	1504516
1407819		1598220																			1476268	1503243	1504519
1517252		1480069																			1476269	1503308	1504529
1543114		1548965																			1476275	1503313	1504599
1366376		1498659																			1476301	1503336	1504676
1383835		1064571																			1476307	1503343	1504855
1599803		1471307																			1476416	1503358	1504892
1467132		1599530																			1476430	1503379	1504993
1325087		1525655																			1476436	1503431	1505068
1528451		1509904																			1476501	1503436	1505120
1555727		1565625																			1476510	1503451	1505281
1517218		1332298																			1476540	1503540	1505356
1476831		1351895																			1476547	1503598	1505363
1542924		1507622																			1476551	1503636	1505367
1379918		1559194																			1476625	1503673	1505407
1353146		1504753																			1476642	1503808	1505560
1570085		1575802																			1476707	1503820	1505647
1599218		1446829																			1476748	1503830	1505689
1553630		1436138																			1476754	1503924	1505709
1363928		1392129																			1476831	1504044	1505846
1505782		1461876																			1476868	1504188	1505860
1515228		1473979																			1476875	1504195	1505877
1483159		1499874																			1476912	1504213	1505888
1458157		1500477																			1476915	1504248	1505914
1454016		1519627																			1476918	1504289	1505973
1472194		1449310																			1476952	1504295	1506130
1532173		1506605																			1476967	1504297	1506186
1324484		1550954																			1477039	1504353	1506251
1372613		1467472																			1477078	1504362	1506296
1463991		1559320																			1477099	1504365	1506472
1594458		1587591																			1477123	1504506	1506575
1598074		1509866																			1477137	1504511	1506581
1598271		1385063																			1477142	1504631	1506620
1353183		1537364																			1477151	1504634	1506626
1519129		1498214																			1477157	1504641	1506652
1531690		1463345																			1477165	1504649	1506696
1453124		1521309																			1477233	1504694	1506713
1486686		1456375																			1477271	1504753	1506770
1471195		1555914																			1477295	1504770	1506796
1505703		1548463																			1477345	1504888	1506803
1480700		1445917																			1477364	1504902	1506884
1484050		1517232																			1477373	1505034	1506979
1475249		1477404																			1477376	1505043	1507117
1531102		1563426																			1477423	1505074	1507134
1596883		1505100																			1477449	1505100	1507148
1540588		1540839																			1477472	1505111	1507229
1447512		1444251																			1477496	1505112	1507234
1442942		1489165																			1477568	1505393	1507384
1455312		1479044																			1477579	1505395	1507402
1585462		1437536																			1477596	1505420	1507419
1597426		1564265																			1477598	1505476	1507427
1507145		1459775																			1477776	1505520	1507437
1539249		1520573																			1477799	1505547	1507528
1458607		1369212																			1477803	1505659	1507614
1415883		1453250																			1477825	1505672	1507616
1507952		1601194																			1477828	1505835	1507629
1451569		1503502																			1477945	1505841	1507691
1471074		1430444																			1477953	1505851	1507756
1336324		1463208																			1477967	1505922	1507809
1512327		1479391																			1478086	1505943	1507885
1458170		1527882																			1478111	1505949	1507912
1373133		1550528																			1478202	1506005	1507958
1506142		1519829																			1478208	1506031	1507960
1563956		1551807																			1478322	1506036	1508018
1502874		1544659																			1478332	1506083	1508043
1524882		1413544																			1478338	1506100	1508116
1468406		1579610																			1478342	1506135	1508133
1514203		1489857																			1478359	1506138	1508136
1560519		1435452																			1478382	1506159	1508251
1484154		1516317																			1478401	1506211	1508254
1517516		1457249																			1478463	1506249	1508269
1346779		1474160																			1478492	1506308	1508277
1367673		1479835																			1478497	1506418	1508304
1454122		1552230																			1478500	1506435	1508326
1555562		1507851																			1478508	1506480	1508414
1536790		1453222																			1478604	1506562	1508618
1527200		1555490																			1478607	1506566	1508627
1556949		1490375																			1478867	1506605	1508648
1530130		1585643																			1478875	1506616	1508719
1562323		1090115																			1478896	1506643	1508729
1377605		1462738																			1478913	1506711	1508731
1526608		1484321																			1478934	1506720	1508737
1344607		1137506																			1478984	1506726	1508830
[truncated: 3,588 more rows]
