# Supplementary material for: Coordinated Gene Family Evolution Shapes the Genome of Dimorphic Organisms
Source: Research Square preprint supplement (doi:10.21203/rs.3.rs-6393820/v1), 2025-04-08
Supplement: Supplementary file 7 [file c76464a4db71adac1fb421ad.xlsx]

## Sheet: Yeast Genes
ID	Expression	Morfologia
1526830	2.00254	Yeast
1453214	1.5779	Yeast
1478733	7.6631	Yeast
1541314	4.77565	Yeast
1509195	1.55289	Yeast
1567818	1.47636	Yeast
1172608	1.31752	Yeast
1338180	1.01791	Yeast
1483184	2.75325	Yeast
1432833	1.57201	Yeast
1567261	1.29131	Yeast
1483038	1.1487	Yeast
1524645	2.318	Yeast
1598008	2.53283	Yeast
1506720	1.25625	Yeast
1411855	1.9926	Yeast
1368998	1.45555	Yeast
1477391	3.6587	Yeast
1510047	1.13212	Yeast
1588237	2.6578	Yeast
1366939	7.46384	Yeast
1524831	1.63932	Yeast
1496215	4.38079	Yeast
1485531	1.6044	Yeast
1540403	1.75635	Yeast
1547169	3.79072	Yeast
1470152	1.52248	Yeast
1526650	1.34422	Yeast
1543227	1.39348	Yeast
1332775	1.24705	Yeast
1468343	1.90782	Yeast
1542322	2.28841	Yeast
1557105	6.14858	Yeast
1466031	5.85518	Yeast
1601272	2.09375	Yeast
1417603	1.46975	Yeast
1509447	1.0831	Yeast
1332224	1.32033	Yeast
1514737	2.16578	Yeast
1439783	1.74829	Yeast
1516451	2.70863	Yeast
1557921	1.69753	Yeast
1363706	4.17206	Yeast
1484346	1.11914	Yeast
1487407	1.41069	Yeast
1511305	4.35673	Yeast
1477841	2.57361	Yeast
1385353	2.01159	Yeast
1361103	2.06587	Yeast
1521389	2.50214	Yeast
1519910	4.34906	Yeast
1366981	2.97386	Yeast
1526423	1.36614	Yeast
1465840	1.6877	Yeast
1556435	1.11562	Yeast
1510917	1.06096	Yeast
1522644	2.36327	Yeast
1522709	1.26269	Yeast
1547052	1.38725	Yeast
1454648	1.17885	Yeast
1105717	2.80099	Yeast
1349920	2.26725	Yeast
1586050	1.88987	Yeast
1529199	2.41664	Yeast
1601191	1.53816	Yeast
1443387	2.11098	Yeast
1536423	1.71348	Yeast
1597405	3.274	Yeast
1553721	1.35152	Yeast
1445917	3.4304	Yeast
1512677	2.87808	Yeast
1503213	2.10001	Yeast
1510383	2.40571	Yeast
1523377	1.56078	Yeast
1513372	1.85315	Yeast
1463775	2.92432	Yeast
1538881	4.37742	Yeast
1510681	1.20318	Yeast
1499754	1.05297	Yeast
1506917	1.58322	Yeast
1530379	1.53799	Yeast
1382830	1.1908	Yeast
1511477	2.12838	Yeast
1368057	1.13904	Yeast
1502034	1.61941	Yeast
1540682	1.45216	Yeast
1493931	1.92085	Yeast
1354411	2.00155	Yeast
1382431	2.55623	Yeast
1515732	2.64141	Yeast
1539098	2.4488	Yeast
1557265	2.70527	Yeast
1468507	3.64279	Yeast
1513266	1.67857	Yeast
1521722	1.76279	Yeast
1458605	1.5787	Yeast
1461935	5.79745	Yeast
1528747	1.46138	Yeast
1360470	1.12325	Yeast
1477485	1.84293	Yeast
1518065	4.67448	Yeast
1448038	1.43629	Yeast
1592151	1.09696	Yeast
1465355	1.13632	Yeast
1524651	2.12482	Yeast
1553980	1.8908	Yeast
1352156	2.113	Yeast
1417689	2.43754	Yeast
1481353	3.20036	Yeast
1538086	2.59652	Yeast
1586774	1.59518	Yeast
1320004	2.00751	Yeast
1522998	2.25956	Yeast
1474846	6.08291	Yeast
1519250	5.63853	Yeast
1599625	1.64962	Yeast
1561494	1.31193	Yeast
1545777	1.43253	Yeast
1507480	1.66832	Yeast
1451930	1.3033	Yeast
1470833	1.81696	Yeast
1089537	2.54651	Yeast
1596060	1.2318	Yeast
1538065	1.07622	Yeast
1479787	2.20781	Yeast
1485583	4.64158	Yeast
1487682	1.95015	Yeast
1459775	3.21361	Yeast
1479417	2.1997	Yeast
1594519	1.48006	Yeast
1464356	1.16697	Yeast
1451822	3.58376	Yeast
1355556	1.06868	Yeast
1601194	3.01986	Yeast
1517492	1.58558	Yeast
1442540	2.31744	Yeast
1548463	3.50154	Yeast
1548293	1.66734	Yeast
1536658	1.65003	Yeast
1466895	1.72524	Yeast
1544770	2.6876	Yeast
1461079	1.1277	Yeast
1593470	4.82471	Yeast
1370833	3.17176	Yeast
1590550	1.11676	Yeast
1529057	1.10908	Yeast
1545615	3.36162	Yeast
1451840	1.27993	Yeast
1495322	1.02543	Yeast
1528724	1.40227	Yeast
1321644	1.10651	Yeast
1455837	1.03857	Yeast
1568192	1.87081	Yeast
1489514	2.57578	Yeast
1536417	2.90076	Yeast
1499410	2.10588	Yeast
1497484	1.32019	Yeast
1514297	2.34236	Yeast
1464650	2.08781	Yeast
1599970	1.03711	Yeast
1565517	1.03705	Yeast
1456858	1.99894	Yeast
1142208	1.40557	Yeast
1369414	3.12381	Yeast
1519613	1.47349	Yeast
1536522	1.61231	Yeast
1450370	1.45784	Yeast
1493821	1.96956	Yeast
1499364	2.32305	Yeast
1507061	5.03435	Yeast
1370267	1.88317	Yeast
1489836	2.12042	Yeast
1528739	2.45916	Yeast
1463849	2.21343	Yeast
1503098	3.82302	Yeast
1565065	1.58465	Yeast
1489601	2.05187	Yeast
1471313	3.20189	Yeast
1478813	1.62929	Yeast
1462829	1.14627	Yeast
1557283	3.95477	Yeast
1517144	2.61855	Yeast
1532165	2.37937	Yeast
1543219	2.2757	Yeast
1434987	4.18312	Yeast
1519231	2.53833	Yeast
1550851	2.78379	Yeast
1479982	3.64706	Yeast
1511573	1.8672	Yeast
1473979	2.96059	Yeast
1548886	1.26554	Yeast
1551605	1.26739	Yeast
1113119	1.08629	Yeast
1491599	1.95303	Yeast
1496991	6.10277	Yeast
1542987	3.42296	Yeast
1563312	3.30525	Yeast
1433155	7.21882	Yeast
1513577	3.82365	Yeast
1491404	1.52209	Yeast
1539543	1.03996	Yeast
1493623	1.37483	Yeast
1392095	3.44094	Yeast
1375186	1.21365	Yeast
1366471	1.08727	Yeast
1354449	1.11944	Yeast
1407617	1.13661	Yeast
1534235	1.16887	Yeast
1513652	1.93625	Yeast
1539565	2.35055	Yeast
1479505	1.20066	Yeast
1491730	2.75945	Yeast
1498659	5.36767	Yeast
1453250	2.92674	Yeast
1516978	1.41147	Yeast
1483805	1.20855	Yeast
1476979	1.34368	Yeast
1479280	1.88011	Yeast
1543223	3.68769	Yeast
1510146	1.58434	Yeast
1532428	1.33587	Yeast
1599537	2.26817	Yeast
1491617	4.80474	Yeast
1534694	1.24719	Yeast
1474946	2.3849	Yeast
1539476	1.92199	Yeast
1549930	1.97755	Yeast
1551896	2.44985	Yeast
1338466	1.87363	Yeast
1480453	1.25581	Yeast
1534483	3.17007	Yeast
1360545	1.31482	Yeast
1502470	1.67219	Yeast
1561808	2.28278	Yeast
1455558	5.12307	Yeast
1492295	1.50791	Yeast
1556840	1.64296	Yeast
1507946	3.5541	Yeast
1511510	1.45651	Yeast
1323894	1.60831	Yeast
1389512	2.58228	Yeast
1521801	3.56613	Yeast
1465714	2.31843	Yeast
1566660	1.02849	Yeast
1511602	2.56597	Yeast
1375653	2.318	Yeast
1513688	1.19435	Yeast
1321045	1.88621	Yeast
1492904	3.24437	Yeast
1376181	1.27533	Yeast
1528188	3.05418	Yeast
1455336	2.71779	Yeast
1503830	2.73449	Yeast
1502638	2.47697	Yeast
1594776	1.16242	Yeast
1547199	1.77148	Yeast
1566976	2.59158	Yeast
1344959	1.77886	Yeast
1386293	1.51056	Yeast
1463895	1.71877	Yeast
1496950	1.71691	Yeast
1527938	1.4478	Yeast
1509686	1.63844	Yeast
1599721	1.7637	Yeast
1497897	3.73806	Yeast
1499283	2.35368	Yeast
1534908	1.71733	Yeast
1599801	2.29401	Yeast
1500319	1.35981	Yeast
1512912	1.71267	Yeast
1543329	2.52001	Yeast
1476805	7.79687	Yeast
1338322	1.09337	Yeast
1442139	1.96311	Yeast
1541311	1.97121	Yeast
1453986	1.41484	Yeast
1486552	2.45579	Yeast
1507205	2.6214	Yeast
1526430	1.61346	Yeast
1336652	1.3663	Yeast
1473832	1.69208	Yeast
1442255	2.64033	Yeast
1460410	1.27782	Yeast
1519092	2.5135	Yeast
1518590	2.31279	Yeast
1584571	2.03716	Yeast
1498959	2.09512	Yeast
1473476	4.87603	Yeast
1486323	1.72731	Yeast
1459227	3.00353	Yeast
1550833	1.73343	Yeast
1349346	2.83066	Yeast
1508412	2.32561	Yeast
1490714	2.25308	Yeast
1599753	1.92638	Yeast
1472498	1.15739	Yeast
1365813	1.73913	Yeast
1484321	3.30376	Yeast
1548630	1.25944	Yeast
1497406	2.28894	Yeast
1548906	1.84181	Yeast
1469013	4.81718	Yeast
1501215	3.19098	Yeast
1475999	2.11433	Yeast
1539587	7.26107	Yeast
1528940	3.05253	Yeast
1468674	3.75835	Yeast
1514346	1.72659	Yeast
1537172	1.62511	Yeast
1451668	1.09559	Yeast
1479835	5.76914	Yeast
1525833	1.68157	Yeast
1542693	2.15632	Yeast
1488681	3.33321	Yeast
1326901	1.73336	Yeast
1547394	2.82541	Yeast
1600894	1.09806	Yeast
1483452	1.30885	Yeast
1540993	1.84091	Yeast
1550301	1.86935	Yeast
1464175	1.12575	Yeast
1473055	3.18979	Yeast
1525200	3.29445	Yeast
1543817	3.20337	Yeast
1537805	1.21445	Yeast
1553903	3.69869	Yeast
1593046	1.23758	Yeast
1502260	2.90879	Yeast
1354749	1.27038	Yeast
1070820	1.57804	Yeast
1369036	1.00376	Yeast
1473869	4.44354	Yeast
1555171	1.49731	Yeast
1508679	1.1125	Yeast
1551944	1.63176	Yeast
1346588	1.58395	Yeast
1492344	2.07577	Yeast
1448947	1.535	Yeast
1453482	1.97707	Yeast
1534495	2.72417	Yeast
1510801	1.98384	Yeast
1536877	2.00718	Yeast
1550320	2.74215	Yeast
1599050	1.71359	Yeast
1474872	3.63811	Yeast
1489285	1.31045	Yeast
1365588	1.96604	Yeast
1516383	1.89596	Yeast
1470203	3.35745	Yeast
1492174	1.28568	Yeast
1525526	1.16382	Yeast
1529859	2.52648	Yeast
1343354	1.41181	Yeast
1475598	1.32501	Yeast
1495306	2.36229	Yeast
1493384	1.22429	Yeast
1493690	2.02256	Yeast
1496228	3.3498	Yeast
1514880	1.38289	Yeast
1370793	3.37229	Yeast
1388546	5.88171	Yeast
1465130	1.78578	Yeast
1510080	2.94722	Yeast
1529472	8.50312	Yeast
1540187	2.40344	Yeast
1541540	1.53797	Yeast
1463582	1.47206	Yeast
1597432	1.323	Yeast
1351860	2.66699	Yeast
1479994	5.4639	Yeast
1512084	1.43773	Yeast
1538601	3.04133	Yeast
1521260	4.51023	Yeast
1370120	1.30737	Yeast
1477741	1.41489	Yeast
1526792	4.7774	Yeast
1443568	5.27822	Yeast
1467142	1.79891	Yeast
1504353	1.49715	Yeast
1531697	1.2426	Yeast
1533700	1.68628	Yeast
1011519	1.65209	Yeast
1472582	1.62618	Yeast
1535323	1.31511	Yeast
1472834	1.17715	Yeast
1483902	1.71685	Yeast
1528353	3.85099	Yeast
1513904	1.66175	Yeast
1515727	2.54069	Yeast
1567473	1.33914	Yeast
1550389	2.0035	Yeast
1552698	1.73836	Yeast
1597839	2.19526	Yeast
1392021	6.27867	Yeast
1536541	1.98697	Yeast
1590338	2.58999	Yeast
1595391	4.57701	Yeast
1492451	2.52636	Yeast
1379354	2.22266	Yeast
1378485	1.0197	Yeast
1535965	1.00164	Yeast
1536707	1.63631	Yeast
1463790	3.60436	Yeast
1505111	3.2224	Yeast
1451046	2.01303	Yeast
1504694	2.14874	Yeast
1520518	1.96811	Yeast
1539225	4.2435	Yeast
1544172	1.43172	Yeast
1496792	2.54657	Yeast
1512764	1.6225	Yeast
1493673	1.67191	Yeast
1368742	5.74345	Yeast
1501606	5.08221	Yeast
1510745	1.36668	Yeast
1519048	4.45263	Yeast
1536862	2.8064	Yeast
1358118	1.09846	Yeast
1548593	2.41873	Yeast
1341134	1.2568	Yeast
1348151	1.07096	Yeast
1384491	2.82628	Yeast
1454866	1.28001	Yeast
1490846	2.35708	Yeast
1371776	1.18786	Yeast
1475342	1.72232	Yeast
1539147	1.39235	Yeast
1540946	1.73341	Yeast
1360056	10.6098	Yeast
1499986	2.1267	Yeast
1592466	2.88724	Yeast
1592584	1.24407	Yeast
1468936	2.12292	Yeast
1388838	1.67554	Yeast
1530357	1.29898	Yeast
1442683	3.48225	Yeast
1456873	1.31446	Yeast
1495588	2.0027	Yeast
1494084	1.14683	Yeast
1515605	1.79573	Yeast
1591501	5.27543	Yeast
1329977	1.35806	Yeast
1445333	1.81479	Yeast
1466017	1.08894	Yeast
1392552	3.61926	Yeast
1595395	1.2811	Yeast
1515675	1.3442	Yeast
1458175	2.28338	Yeast
1542027	1.48307	Yeast
1508743	2.5879	Yeast
1557296	1.21956	Yeast
1597496	1.24604	Yeast
1549569	3.55703	Yeast
1521108	1.65423	Yeast
1509483	4.59798	Yeast
1544476	1.0991	Yeast
1473174	1.82954	Yeast
1554268	4.372	Yeast
1444467	2.27421	Yeast
1459886	7.68056	Yeast
1462423	2.89253	Yeast
1489483	2.86832	Yeast
1500385	1.02398	Yeast
1444518	1.05684	Yeast
1507441	2.63433	Yeast
1477404	3.797	Yeast
1514170	5.32592	Yeast
1458415	1.23826	Yeast
1496962	1.99641	Yeast
1512664	2.19977	Yeast
1499850	2.48133	Yeast
1537763	3.10627	Yeast
1361519	6.60629	Yeast
1508136	2.9678	Yeast
1472924	3.25858	Yeast
1523127	1.80221	Yeast
1561330	1.03493	Yeast
1593559	2.70924	Yeast
1468031	5.53156	Yeast
1551499	2.45876	Yeast
1459199	1.24357	Yeast
1411357	1.34844	Yeast
1461558	2.17463	Yeast
1526973	1.46964	Yeast
1528168	1.1508	Yeast
1544877	1.85618	Yeast
1570897	3.39745	Yeast
1453879	3.48677	Yeast
1454575	1.82124	Yeast
1461302	2.06389	Yeast
1485498	3.87383	Yeast
1499656	3.76227	Yeast
1515657	3.57163	Yeast
1526573	1.05797	Yeast
1370182	1.99222	Yeast
1540612	1.24631	Yeast
1529143	2.74732	Yeast
1456609	1.42572	Yeast
1595325	1.51584	Yeast
1017362	6.29045	Yeast
1462183	3.00827	Yeast
1539496	1.59411	Yeast
1517051	3.90386	Yeast
1551538	1.65195	Yeast
1473520	1.01227	Yeast
1362793	3.40404	Yeast
1504289	1.37281	Yeast
1539719	2.49372	Yeast
1476395	2.1972	Yeast
1522286	1.23886	Yeast
1597077	2.64109	Yeast
1479044	2.89777	Yeast
1378462	1.42413	Yeast
1463022	7.75013	Yeast
1559754	1.27461	Yeast
1489424	1.33057	Yeast
1470106	1.06849	Yeast
1533016	3.18103	Yeast
1546398	1.14943	Yeast
1378979	1.73832	Yeast
1460383	2.90462	Yeast
1490639	1.65621	Yeast
1598495	1.51586	Yeast
1321818	2.1921	Yeast
1416401	1.32499	Yeast
1479602	3.19033	Yeast
1506970	2.18716	Yeast
1508638	1.42991	Yeast
1391783	1.35521	Yeast
1472787	1.09586	Yeast
1456375	2.97155	Yeast
1461828	1.5228	Yeast
1507880	1.765	Yeast
1551349	4.8364	Yeast
1593123	1.59007	Yeast
1327596	1.85319	Yeast
1373768	2.86579	Yeast
1502597	2.4081	Yeast
1375940	1.53393	Yeast
1471125	1.5406	Yeast
1476808	5.22306	Yeast
1496113	1.61617	Yeast
1497653	2.16887	Yeast
1519627	2.99837	Yeast
1591235	1.34692	Yeast
1411183	1.01608	Yeast
1505835	1.26703	Yeast
1525756	2.8231	Yeast
1016555	1.21884	Yeast
1362387	3.20045	Yeast
1391658	2.08273	Yeast
1474403	1.36015	Yeast
1479384	1.37268	Yeast
1503598	3.34749	Yeast
1377029	1.19797	Yeast
1492764	2.42699	Yeast
1495792	1.89006	Yeast
1498873	4.36791	Yeast
1499536	3.99757	Yeast
1526943	1.04144	Yeast
1535708	2.23518	Yeast
1321814	2.08459	Yeast
1350665	1.00042	Yeast
1507673	2.06729	Yeast
1590915	1.76636	Yeast
1485455	2.38786	Yeast
1356402	1.40916	Yeast
1467472	3.17672	Yeast
1520670	1.69111	Yeast
1503604	1.00915	Yeast
1523061	7.23823	Yeast
1515454	2.64985	Yeast
1564493	1.37945	Yeast
1478217	1.35369	Yeast
1566886	1.8881	Yeast
1584864	2.1411	Yeast
1510551	2.30628	Yeast
1515093	1.90898	Yeast
1556695	1.79848	Yeast
1110725	8.17179	Yeast
1340513	1.09724	Yeast
1389979	2.26542	Yeast
1525610	6.99961	Yeast
1349328	4.79369	Yeast
1457249	3.51147	Yeast
1376222	2.75524	Yeast
1500888	2.08908	Yeast
1516201	6.68938	Yeast
1588338	1.32057	Yeast
1485631	1.91377	Yeast
1496121	1.31631	Yeast
1531727	1.43273	Yeast
1568122	1.99646	Yeast
1468868	1.10996	Yeast
1522893	1.11975	Yeast
1568132	2.13327	Yeast
1058589	1.86468	Yeast
1334448	1.64353	Yeast
1368904	1.46153	Yeast
1446132	1.22491	Yeast
1456862	1.64434	Yeast
1466527	8.29815	Yeast
1476125	1.15094	Yeast
1324211	1.38546	Yeast
1480913	1.69233	Yeast
1375619	1.27566	Yeast
1504888	2.50923	Yeast
1538254	3.3091	Yeast
1371713	1.30456	Yeast
1556564	2.96932	Yeast
1358830	1.91559	Yeast
1480069	4.88456	Yeast
1538935	2.48991	Yeast
1556665	1.45817	Yeast
1465833	2.64279	Yeast
1504213	1.56877	Yeast
1510285	4.08265	Yeast
1551422	3.39609	Yeast
1564720	2.62375	Yeast
1516720	1.3064	Yeast
1563230	1.13245	Yeast
1459297	1.84684	Yeast
1492727	1.36476	Yeast
1470957	3.67837	Yeast
1509917	1.99828	Yeast
1592603	4.16194	Yeast
1462617	2.73612	Yeast
1465898	1.31591	Yeast
1470940	1.2202	Yeast
1482101	2.04996	Yeast
1488731	1.20041	Yeast
1453067	1.16095	Yeast
1482738	1.24024	Yeast
1542756	1.96809	Yeast
1460370	3.22168	Yeast
1541114	2.38163	Yeast
1560462	7.19341	Yeast
1590178	1.78598	Yeast
1567159	1.83159	Yeast
1350393	4.94854	Yeast
1358529	1.85057	Yeast
1395134	2.67011	Yeast
1509904	3.25218	Yeast
1457367	1.16469	Yeast
1459582	1.00273	Yeast
1471230	5.47063	Yeast
1480208	5.33895	Yeast
1321812	3.62275	Yeast
1335868	3.26437	Yeast
1380743	5.55378	Yeast
1461336	1.95561	Yeast
1487485	2.18982	Yeast
1497670	2.67325	Yeast
1458302	3.88528	Yeast
1510092	2.14841	Yeast
1525312	2.19106	Yeast
1458093	1.06142	Yeast
1361193	1.89339	Yeast
1501795	3.82292	Yeast
1565625	2.88517	Yeast
1596732	1.64261	Yeast
1449754	1.93289	Yeast
1467478	6.32197	Yeast
1365395	7.34966	Yeast
1523924	1.12422	Yeast
1390361	1.03818	Yeast
1464498	3.32727	Yeast
1480256	1.19876	Yeast
1485344	3.63648	Yeast
1464628	1.5176	Yeast
1510037	1.63151	Yeast
1513261	3.69246	Yeast
1461517	1.03295	Yeast
1478509	1.93455	Yeast
1535478	1.83342	Yeast
1558884	2.26562	Yeast
1490787	2.01874	Yeast
1356251	1.17871	Yeast
1474747	5.73644	Yeast
1520884	1.09913	Yeast
1531804	6.05989	Yeast
1455761	2.27372	Yeast
1461840	2.58578	Yeast
1595738	2.46884	Yeast
1484232	1.91798	Yeast
1537217	1.06699	Yeast
1544106	1.42389	Yeast
1551509	4.40334	Yeast
1374022	4.40804	Yeast
1392216	1.80444	Yeast
1517174	1.93004	Yeast
1566527	2.52128	Yeast
1367326	1.2853	Yeast
1504506	1.245	Yeast
1541938	1.60486	Yeast
1598614	2.53332	Yeast
1137506	3.10502	Yeast
1473555	1.90276	Yeast
1473789	1.80827	Yeast
1517631	1.90253	Yeast
1531416	1.14602	Yeast
1597902	2.02447	Yeast
1359239	1.95167	Yeast
1448926	6.77521	Yeast
1453906	2.10961	Yeast
1480088	1.68241	Yeast
1482725	1.49852	Yeast
1552891	5.34895	Yeast
1375001	6.83775	Yeast
1380827	3.76863	Yeast
1531721	2.60738	Yeast
1455546	9.2383	Yeast
1484683	2.40923	Yeast
1488544	5.70626	Yeast
1517473	2.62295	Yeast
1365920	1.50714	Yeast
1481958	2.53087	Yeast
1519939	3.82016	Yeast
1531020	1.60032	Yeast
1538436	2.15409	Yeast
1550513	6.94167	Yeast
1553220	1.51415	Yeast
1501848	1.00741	Yeast
1594222	1.9884	Yeast
1342014	2.02342	Yeast
1472825	1.32706	Yeast
1487915	1.39343	Yeast
1451780	1.21386	Yeast
1529426	2.4221	Yeast
1513155	1.10287	Yeast
1453553	1.01737	Yeast
1563235	6.03283	Yeast
1597478	1.53241	Yeast
1601362	1.88628	Yeast
1378447	3.03697	Yeast
1500477	2.83349	Yeast
1533158	1.02674	Yeast
1358409	1.88109	Yeast
1445765	3.28757	Yeast
1446094	1.79407	Yeast
1051461	1.06178	Yeast
1535409	1.6151	Yeast
1448712	6.64435	Yeast
1475710	1.03668	Yeast
1489593	2.36371	Yeast
1501861	3.25136	Yeast
1509430	1.16835	Yeast
1517363	1.20776	Yeast
1528708	1.22553	Yeast
1586680	2.47443	Yeast
1487255	1.91475	Yeast
1510008	1.44226	Yeast
1543933	1.2739	Yeast
1349554	1.77744	Yeast
1442573	2.72982	Yeast
1457381	3.11626	Yeast
1496560	2.17465	Yeast
1505949	1.141	Yeast
1477034	1.04021	Yeast
1582767	2.03966	Yeast
1463755	1.65657	Yeast
1542764	1.06555	Yeast
1323901	1.70885	Yeast
1349781	1.12727	Yeast
1374463	1.78437	Yeast
1470743	1.95537	Yeast
1490625	2.38112	Yeast
1497189	1.65802	Yeast
1531793	3.67035	Yeast
1470163	1.09979	Yeast
1471155	1.025	Yeast
1582431	1.45461	Yeast
1460748	1.1947	Yeast
1351855	2.21051	Yeast
1589564	4.70593	Yeast
1479802	2.38099	Yeast
1527171	3.45602	Yeast
1536723	3.06372	Yeast
1592399	3.94083	Yeast
1527030	2.11528	Yeast
1538140	1.77297	Yeast
1488474	1.27709	Yeast
1357157	4.8919	Yeast
1512287	1.72386	Yeast
1555938	1.12456	Yeast
1525308	1.36391	Yeast
1542842	6.39606	Yeast
1584900	2.73598	Yeast
1452957	3.19032	Yeast
1457263	2.90035	Yeast
1509693	1.32762	Yeast
1528826	6.18545	Yeast
1517238	3.74023	Yeast
1522275	1.70894	Yeast
1523760	3.24578	Yeast
1555118	1.47713	Yeast
1444929	1.72248	Yeast
1542059	1.23914	Yeast
1459429	2.05633	Yeast
1467079	1.73546	Yeast
1486335	5.07034	Yeast
1536057	1.19409	Yeast
1554828	7.38359	Yeast
1459823	1.01889	Yeast
1521908	8.53838	Yeast
1392129	3.46851	Yeast
1556694	1.98543	Yeast
1463336	2.47839	Yeast
1453784	1.37984	Yeast
1465100	3.24697	Yeast
1557395	2.87603	Yeast
1376164	1.99587	Yeast
1484339	2.04408	Yeast
1535416	2.70532	Yeast
1531745	3.3939	Yeast
1471100	1.66773	Yeast
1549092	1.05757	Yeast
1557012	1.36884	Yeast
1521196	1.4298	Yeast
1599116	3.07445	Yeast
1376994	3.86548	Yeast
1576774	7.02365	Yeast
1499896	1.59981	Yeast
1502493	4.40204	Yeast
1531888	1.76353	Yeast
1542796	1.5657	Yeast
1498610	2.48251	Yeast
1500273	1.66968	Yeast
1515196	3.13577	Yeast
1396025	2.74445	Yeast
1455509	4.96088	Yeast
1508083	2.06244	Yeast
1532776	4.12	Yeast
1536670	2.00105	Yeast
1395398	1.63109	Yeast
1375802	4.77301	Yeast
1454125	4.05155	Yeast
1503808	2.74398	Yeast
1497276	2.86209	Yeast
1518094	5.05347	Yeast
1536480	1.46534	Yeast
1563815	2.65567	Yeast
1584118	1.74878	Yeast
1503336	1.00829	Yeast
1506138	1.61314	Yeast
1355113	2.39475	Yeast
1520376	4.13566	Yeast
1348032	2.27814	Yeast
1472651	1.96126	Yeast
1515838	2.60468	Yeast
1531261	4.98232	Yeast
1551879	3.50677	Yeast
1551972	1.10994	Yeast
1447814	1.19302	Yeast
1567547	3.82813	Yeast
1385063	3.43679	Yeast
1477264	3.20649	Yeast
1506418	1.0902	Yeast
1538212	3.8329	Yeast
1487100	3.12263	Yeast
1550775	1.46101	Yeast
1457591	1.39096	Yeast
1468915	2.03707	Yeast
1324589	3.82299	Yeast
1554284	6.04004	Yeast
1477565	2.2914	Yeast
1535314	1.28073	Yeast
1466403	1.26691	Yeast
1474771	1.06938	Yeast
1485385	1.55123	Yeast
1503192	1.20515	Yeast
1513984	1.04421	Yeast
1552264	1.96771	Yeast
1594339	3.83112	Yeast
1447448	9.09047	Yeast
1444640	1.00432	Yeast
1469038	1.12872	Yeast
1483482	1.62248	Yeast
1487669	1.87556	Yeast
1503140	1.84003	Yeast
1516838	1.1289	Yeast
1536904	1.10881	Yeast
1554205	2.85656	Yeast
1469075	1.18399	Yeast
1476407	2.50914	Yeast
1449776	6.09491	Yeast
1496886	1.36495	Yeast
1521461	1.64037	Yeast
1449740	6.86534	Yeast
1552096	1.62596	Yeast
1080982	3.25977	Yeast
1525655	3.00685	Yeast
1530619	4.5692	Yeast
1335674	2.21977	Yeast
1362057	2.07559	Yeast
1431483	3.92444	Yeast
1503451	1.08091	Yeast
1509442	5.13495	Yeast
1535025	2.30596	Yeast
1519340	2.42598	Yeast
1545195	2.94781	Yeast
1480133	1.23391	Yeast
1387057	1.12426	Yeast
1499290	2.82102	Yeast
1531893	1.13159	Yeast
1541103	1.31982	Yeast
1547569	3.71983	Yeast
1465980	2.01934	Yeast
1338377	2.94271	Yeast
1461798	2.38042	Yeast
1503235	1.80882	Yeast
1549377	1.61841	Yeast
1512497	2.01771	Yeast
1565697	3.37299	Yeast
1123590	1.38162	Yeast
1467647	1.30347	Yeast
1508067	1.46672	Yeast
1552434	2.30857	Yeast
1441941	1.14364	Yeast
1557935	2.01052	Yeast
1363579	2.21474	Yeast
1452915	1.72883	Yeast
1495705	1.0668	Yeast
1520062	2.00639	Yeast
1365504	2.61727	Yeast
1568349	1.23804	Yeast
1494884	5.5116	Yeast
1510317	4.36155	Yeast
1329765	1.65927	Yeast
1466816	1.68792	Yeast
1555503	1.94862	Yeast
1022753	2.5235	Yeast
1466541	1.25818	Yeast
1473464	3.4932	Yeast
1497581	1.93277	Yeast
1461648	1.4712	Yeast
1505476	1.33678	Yeast
1377002	1.01491	Yeast
1455858	1.18643	Yeast
1516037	1.19502	Yeast
1467754	1.84604	Yeast
1387967	1.67872	Yeast
1525142	1.75628	Yeast
1529591	3.1182	Yeast
1545756	6.12593	Yeast
1467320	1.39839	Yeast
1475943	4.1633	Yeast
1528118	1.77442	Yeast
1333881	1.64726	Yeast
1347837	2.01375	Yeast
1355645	1.57785	Yeast
1456931	2.54071	Yeast
1532545	1.43473	Yeast
1562197	3.17713	Yeast
1455413	2.73648	Yeast
1484818	4.01041	Yeast
1535465	1.46175	Yeast
1518235	1.50196	Yeast
1532073	1.43252	Yeast
1583971	2.22973	Yeast
1337122	1.1238	Yeast
1323491	1.59139	Yeast
1507090	4.57855	Yeast
1557234	1.83018	Yeast
1579495	2.16899	Yeast
1484195	1.99118	Yeast
1487070	1.51894	Yeast
1530667	1.5786	Yeast
1532369	2.03861	Yeast
1535568	3.63641	Yeast
1547552	1.8411	Yeast
1580646	3.05669	Yeast
1385020	1.3361	Yeast
1460907	3.35807	Yeast
1485224	1.03242	Yeast
1521309	2.80318	Yeast
1531186	1.61609	Yeast
1557293	1.21819	Yeast
1491466	3.81815	Yeast
1515698	1.14694	Yeast
1385755	2.80735	Yeast
1487429	2.54856	Yeast
1534344	3.5814	Yeast
1493455	1.57941	Yeast
1359553	2.61673	Yeast
1467556	2.8019	Yeast
1468087	3.53211	Yeast
1470354	2.54867	Yeast
1589202	1.66071	Yeast
1442810	2.2961	Yeast
1589859	2.25897	Yeast
1522660	1.83149	Yeast
1507614	1.01391	Yeast
1508170	1.36531	Yeast
1463879	1.25843	Yeast
1551283	1.2286	Yeast
1555067	4.2083	Yeast
1469871	1.10034	Yeast
1503223	7.03872	Yeast
1518044	3.46245	Yeast
1534209	3.38626	Yeast
1551722	1.7762	Yeast
1554198	2.11554	Yeast
1468650	2.33105	Yeast
1483016	1.00544	Yeast
1372566	2.18142	Yeast
1472588	4.29311	Yeast
1504753	4.93285	Yeast
1551425	2.21736	Yeast
1372100	3.40616	Yeast
1493762	3.05676	Yeast
1505841	1.68836	Yeast
1470187	1.44208	Yeast
1546937	2.27742	Yeast
1088334	2.2002	Yeast
1456127	2.42073	Yeast
1468445	1.97403	Yeast
1535877	1.96108	Yeast
1457505	2.23779	Yeast
1472219	1.97589	Yeast
1535893	4.33374	Yeast
1551243	1.05549	Yeast
1453011	2.06283	Yeast
1509580	2.62824	Yeast
1511833	2.16928	Yeast
1569558	2.56384	Yeast
1591267	1.1461	Yeast
1130616	2.73391	Yeast
1471307	2.99303	Yeast
1478759	7.22177	Yeast
1466743	3.16631	Yeast
1496940	1.36681	Yeast
1516443	2.37775	Yeast
1362017	1.31018	Yeast
1454925	1.57107	Yeast
1496432	4.43024	Yeast
1493979	2.68406	Yeast
1519190	1.3587	Yeast
1561862	3.51748	Yeast
1593664	8.91916	Yeast
1553685	1.40792	Yeast
1489076	2.78108	Yeast
1509223	2.30721	Yeast
1545481	2.78164	Yeast
1396098	1.01478	Yeast
1087891	1.75154	Yeast
1490101	1.3528	Yeast
1324007	3.29948	Yeast
1499666	2.08395	Yeast
1516704	2.3408	Yeast
1380311	1.42673	Yeast
1383001	4.95786	Yeast
1483487	1.13126	Yeast
1508628	1.01669	Yeast
1520529	1.27928	Yeast
1527624	1.64236	Yeast
1539204	1.3187	Yeast
1497231	1.77167	Yeast
1498868	1.35504	Yeast
1517105	1.02469	Yeast
1521023	2.67353	Yeast
1555854	1.18792	Yeast
1465341	1.32303	Yeast
1494359	2.58354	Yeast
1521837	1.48358	Yeast
1564132	1.05488	Yeast
1456589	3.4643	Yeast
1459131	1.66869	Yeast
1542231	1.62473	Yeast
1566381	1.26421	Yeast
1554927	1.47814	Yeast
1565926	1.85708	Yeast
1455834	3.98056	Yeast
1466785	2.38318	Yeast
1390719	3.00488	Yeast
1465817	2.21506	Yeast
1482372	2.28196	Yeast
1501776	1.78389	Yeast
1517465	1.84431	Yeast
1530361	5.63064	Yeast
1545099	2.10608	Yeast
1553845	2.9973	Yeast
1349844	1.14673	Yeast
1027173	2.91519	Yeast
1482072	1.54105	Yeast
1488702	1.5673	Yeast
1492004	1.4193	Yeast
1538091	1.25018	Yeast
1465166	2.17291	Yeast
1471105	4.94906	Yeast
1490225	4.96935	Yeast
1500601	4.12421	Yeast
1551524	1.10837	Yeast
1552713	2.97704	Yeast
1457836	1.2704	Yeast
1480879	2.05746	Yeast
1524693	1.56744	Yeast
1487478	5.67626	Yeast
1525273	1.41364	Yeast
1456612	1.5871	Yeast
1522848	11.1611	Yeast
1475614	2.63234	Yeast
1592222	3.62056	Yeast
1437718	2.9567	Yeast
1547219	2.16055	Yeast
1534004	1.58766	Yeast
1455197	3.6809	Yeast
1599709	6.27924	Yeast
1458634	2.47567	Yeast
1462442	2.12835	Yeast
1502350	1.66211	Yeast
1548042	4.75692	Yeast
1553301	1.90041	Yeast
1507010	1.69283	Yeast
1600620	3.14041	Yeast
1473331	1.72166	Yeast
1493495	2.79198	Yeast
1520511	2.09692	Yeast
1522014	1.71143	Yeast
1554918	1.22128	Yeast
1448018	3.59822	Yeast
1466470	3.08606	Yeast
1467105	2.07982	Yeast
1523480	1.16227	Yeast
1486720	2.25404	Yeast
1517342	1.203	Yeast
1413544	2.97741	Yeast
1446787	1.25221	Yeast
1513579	1.65973	Yeast
1518313	1.05633	Yeast
1543070	2.41027	Yeast
1585612	1.93376	Yeast
1384535	3.45414	Yeast
1477368	2.45558	Yeast
1520466	1.44328	Yeast
1568785	4.25802	Yeast
1328507	1.41741	Yeast
1348452	1.88541	Yeast
1471094	1.54076	Yeast
1585292	1.13937	Yeast
1466041	8.46872	Yeast
1466776	2.65184	Yeast
1509480	1.91114	Yeast
1540839	3.16457	Yeast
1533482	1.29656	Yeast
1522447	6.95832	Yeast
1542388	3.59315	Yeast
1474249	3.04983	Yeast
1549279	1.97344	Yeast
1567970	2.6946	Yeast
1461072	3.12469	Yeast
1481539	3.00072	Yeast
1527913	1.57655	Yeast
1485366	2.34051	Yeast
1487419	3.28603	Yeast
1507289	7.31034	Yeast
1586271	1.68923	Yeast
1504188	4.12561	Yeast
1479218	2.53222	Yeast
1489401	4.60201	Yeast
1592058	1.26617	Yeast
1594642	8.11535	Yeast
1363054	1.76855	Yeast
1506566	3.77923	Yeast
1471694	1.7398	Yeast
1473732	1.00784	Yeast
1494247	3.42726	Yeast
1590278	1.02584	Yeast
1498798	1.70019	Yeast
1375964	1.53435	Yeast
1503436	1.73917	Yeast
1380639	2.17478	Yeast
1467081	6.44003	Yeast
1476963	1.14074	Yeast
1509420	2.12886	Yeast
1522854	1.42248	Yeast
1537668	1.39624	Yeast
1540674	4.73222	Yeast
1504902	8.427	Yeast
1550946	1.7782	Yeast
1476478	1.0673	Yeast
1531238	4.39323	Yeast
1485936	2.37342	Yeast
1503820	3.44727	Yeast
1519988	2.25873	Yeast
1525421	4.653	Yeast
1497372	3.45006	Yeast
1532615	1.1581	Yeast
1538895	2.32445	Yeast
1550250	4.11366	Yeast
1573180	2.27264	Yeast
1068905	3.27612	Yeast
1330758	5.02668	Yeast
1573939	2.84155	Yeast
1330595	1.16876	Yeast
1377489	2.47586	Yeast
1491790	2.52325	Yeast
1500307	1.55297	Yeast
1512999	1.69949	Yeast
1531600	5.63229	Yeast
1354579	2.7527	Yeast
1370208	1.94665	Yeast
1481607	1.66855	Yeast
1495271	3.39889	Yeast
1595698	1.12113	Yeast
1475336	4.57853	Yeast
1510087	2.25991	Yeast
1511052	1.84027	Yeast
1468060	1.24629	Yeast
1585553	2.00884	Yeast
1453344	1.79937	Yeast
1465255	4.59937	Yeast
1468053	2.5326	Yeast
1504649	4.85634	Yeast
1597455	1.99807	Yeast
1364309	1.789	Yeast
1569913	4.68963	Yeast
1384007	1.51819	Yeast
1490378	1.07412	Yeast
1501024	3.04876	Yeast
1549936	4.61288	Yeast
1035320	2.49639	Yeast
1370463	4.26511	Yeast
1374041	3.02497	Yeast
1539684	2.21403	Yeast
1459338	1.50568	Yeast
1498425	3.45394	Yeast
1536230	1.03388	Yeast
1550954	3.03259	Yeast
1360648	3.02311	Yeast
1393754	5.52673	Yeast
1459746	2.71965	Yeast
1487522	1.78448	Yeast
1522510	1.38844	Yeast
1495824	1.8154	Yeast
1522002	9.44478	Yeast
1393320	2.75297	Yeast
1465228	1.7804	Yeast
1498158	2.62319	Yeast
1501781	1.62536	Yeast
1543830	3.09023	Yeast
1450601	1.806	Yeast
1159212	4.41129	Yeast
1455904	3.24947	Yeast
1531966	1.02353	Yeast
1570074	2.56685	Yeast
1477768	3.39926	Yeast
1484425	1.50058	Yeast
1539914	2.05423	Yeast
1601442	1.52856	Yeast
1483593	1.6658	Yeast
1484739	2.57637	Yeast
1530634	2.48812	Yeast
1580342	2.00515	Yeast
1351323	2.66714	Yeast
1457722	1.51351	Yeast
1460272	1.61022	Yeast
1495281	1.9297	Yeast
1479952	1.05686	Yeast
1491597	7.45828	Yeast
1521869	2.40585	Yeast
1565860	2.33461	Yeast
1550242	4.39684	Yeast
1587537	3.87946	Yeast
1320545	5.66124	Yeast
1467502	2.05325	Yeast
1486638	1.89628	Yeast
1498225	6.66097	Yeast
1535854	2.22972	Yeast
1500721	2.33752	Yeast
1446561	3.38287	Yeast
1494320	1.59888	Yeast
1492716	2.74014	Yeast
1540454	1.92959	Yeast
1469542	2.09494	Yeast
1497996	4.08282	Yeast
1470490	4.26839	Yeast
1481877	1.79749	Yeast
1494364	5.28026	Yeast
1507622	2.90672	Yeast
1515151	1.19894	Yeast
1522030	3.92734	Yeast
1087735	2.01356	Yeast
1351755	2.69327	Yeast
1358995	1.01666	Yeast
1392577	4.87404	Yeast
1499013	1.19785	Yeast
1502039	1.24933	Yeast
1522432	1.07306	Yeast
1455695	1.08157	Yeast
1550402	6.58352	Yeast
1106253	1.83466	Yeast
1545200	1.28931	Yeast
1492996	1.9402	Yeast
1518576	2.44041	Yeast
1381205	4.07946	Yeast
1462074	1.45358	Yeast
1479933	2.54647	Yeast
1480123	4.03814	Yeast
1510684	2.02191	Yeast
1456699	2.00814	Yeast
1463557	1.13634	Yeast
1532810	2.19134	Yeast
1487273	1.88789	Yeast
1488411	1.12021	Yeast
1488944	1.99379	Yeast
1334573	3.44762	Yeast
1442680	1.46365	Yeast
1458911	1.24388	Yeast
1485656	4.80072	Yeast
1517356	2.93998	Yeast
1534261	1.67451	Yeast
1579216	2.36799	Yeast
1513147	1.67551	Yeast
1524577	6.22228	Yeast
1539312	2.65243	Yeast
1470178	4.63672	Yeast
1492609	5.04531	Yeast
1526841	2.10306	Yeast
1548640	1.04167	Yeast
1552708	2.95415	Yeast
1492742	1.65574	Yeast
1496417	5.96348	Yeast
1453237	1.57215	Yeast
1453734	1.8674	Yeast
1457441	3.30461	Yeast
1464522	2.07614	Yeast
1487293	2.71807	Yeast
1551083	3.29816	Yeast
1583949	2.81711	Yeast
1467323	8.32086	Yeast
1474496	1.64454	Yeast
1467033	3.96197	Yeast
1520034	1.59281	Yeast
1523146	2.07733	Yeast
1537758	2.45713	Yeast
1513298	2.98116	Yeast
1455898	2.06372	Yeast
1525207	2.923	Yeast
1306200	5.81257	Yeast
1396020	2.11312	Yeast
1469926	8.3761	Yeast
1493695	3.38066	Yeast
1495030	2.09516	Yeast
1501814	4.62001	Yeast
1568331	5.3819	Yeast
1338355	2.05819	Yeast
1566395	2.38201	Yeast
1122766	3.27746	Yeast
1494676	2.09122	Yeast
1502487	1.6663	Yeast
1523848	5.03875	Yeast
1579075	1.99742	Yeast
1366549	2.48039	Yeast
1386443	3.52946	Yeast
1467740	2.04313	Yeast
1481868	1.13345	Yeast
1125240	1.25402	Yeast
1389137	4.99006	Yeast
1446236	1.57294	Yeast
1499362	1.27128	Yeast
1526037	2.2117	Yeast
1563619	2.62515	Yeast
1587039	3.20789	Yeast
1597879	2.12738	Yeast
1348231	3.58265	Yeast
1462341	3.26281	Yeast
1469317	3.1356	Yeast
1498713	2.32241	Yeast
1497217	1.72352	Yeast
1502606	2.09605	Yeast
1511628	2.51745	Yeast
1585792	1.21394	Yeast
1466463	1.07659	Yeast
1485059	3.81889	Yeast
1409926	1.49734	Yeast
1467102	2.22533	Yeast
1498488	3.31765	Yeast
1527813	1.64491	Yeast
1452065	1.87642	Yeast
1463802	1.89405	Yeast
1564265	3.18062	Yeast
1362933	1.23491	Yeast
1381902	1.79877	Yeast
1456594	1.15225	Yeast
1488860	1.60644	Yeast
1532885	1.13673	Yeast
1575802	3.04766	Yeast
1525790	1.05221	Yeast
1484504	1.58102	Yeast
1529022	1.46994	Yeast
1544870	1.93665	Yeast
1385506	3.48325	Yeast
1444471	5.76442	Yeast
1532295	3.01476	Yeast
1517258	2.38145	Yeast
1495241	1.33427	Yeast
1524435	5.34131	Yeast
1540798	4.35403	Yeast
1551771	2.00215	Yeast
1552531	3.29223	Yeast
1588874	4.12028	Yeast
1598342	1.54853	Yeast
1507157	2.50923	Yeast
1520765	1.89775	Yeast
1525847	1.34716	Yeast
1443494	1.60435	Yeast
1348421	3.86421	Yeast
1357544	2.16947	Yeast
1511039	4.90136	Yeast
1340604	1.63224	Yeast
1448225	1.38137	Yeast
1526062	1.49054	Yeast
1538050	2.44145	Yeast
1490974	1.35303	Yeast
1546254	3.80581	Yeast
1589857	1.75524	Yeast
1470801	3.1037	Yeast
1474962	7.0274	Yeast
1479580	3.43754	Yeast
1498328	1.05269	Yeast
1535093	1.09879	Yeast
1337077	2.59973	Yeast
1521315	1.97388	Yeast
1563415	3.27099	Yeast
1378276	2.48491	Yeast
1446512	1.8015	Yeast
1510462	1.00713	Yeast
1382236	2.15558	Yeast
1522655	2.2727	Yeast
1526019	2.51139	Yeast
1543073	2.07014	Yeast
1369212	3.93244	Yeast
1529003	1.02913	Yeast
1566105	7.56364	Yeast
1590000	2.53193	Yeast
1447455	5.22025	Yeast
1460633	1.73476	Yeast
1476168	1.55561	Yeast
1500821	1.13643	Yeast
1488348	2.07524	Yeast
1489588	1.15845	Yeast
1500809	1.73756	Yeast
1527577	3.14142	Yeast
1548068	1.92202	Yeast
1553861	1.941	Yeast
1554843	1.58902	Yeast
1177319	3.63707	Yeast
1409390	4.78292	Yeast
1506748	1.02204	Yeast
1552100	1.59453	Yeast
1366387	1.41751	Yeast
1469848	2.89598	Yeast
1519847	1.4297	Yeast
1559584	6.85561	Yeast
1117019	1.21103	Yeast
1468499	1.67137	Yeast
1486866	1.58832	Yeast
1492702	2.27345	Yeast
1519815	2.46121	Yeast
1526861	1.21246	Yeast
1542223	1.87058	Yeast
1454542	1.42625	Yeast
1477027	1.95908	Yeast
1488895	1.78816	Yeast
1496512	1.73993	Yeast
1509616	2.0324	Yeast
1531438	1.06148	Yeast
1544319	2.22638	Yeast
1177218	1.54246	Yeast
1452006	3.38963	Yeast
1525570	1.34659	Yeast
1537486	4.52439	Yeast
1542610	3.03245	Yeast
1332759	1.33974	Yeast
1347705	2.62127	Yeast
1477877	2.4666	Yeast
1513095	3.48918	Yeast
1463699	1.42628	Yeast
1522732	1.02456	Yeast
1559980	2.26618	Yeast
1479574	2.45922	Yeast
1474373	1.03896	Yeast
1510394	2.06669	Yeast
1556448	4.834	Yeast
1525295	1.66218	Yeast
1544229	2.05044	Yeast
1489857	4.63122	Yeast
1531250	6.73782	Yeast
1066877	1.61137	Yeast
1383462	6.96488	Yeast
1477959	5.72615	Yeast
1442702	4.02108	Yeast
1454116	1.18496	Yeast
1469863	2.25248	Yeast
1511046	1.82748	Yeast
1292105	2.55832	Yeast
1467115	3.44608	Yeast
1481061	4.39049	Yeast
1521313	4.55502	Yeast
1543420	5.21999	Yeast
1553411	1.1017	Yeast
1458054	3.08409	Yeast
1526069	4.26411	Yeast
1579035	3.01487	Yeast
1386939	1.0985	Yeast
1458619	1.53024	Yeast
1095462	1.53489	Yeast
1477972	1.26002	Yeast
1514351	4.62244	Yeast
1064571	3.24502	Yeast
1507069	1.6233	Yeast
1515344	4.20477	Yeast
1535285	1.66387	Yeast
1339501	5.1242	Yeast
1522556	3.77395	Yeast
1541561	1.80545	Yeast
1597924	3.98348	Yeast
1600630	1.43542	Yeast
1500133	1.40518	Yeast
1538758	2.21022	Yeast
1535490	2.05346	Yeast
1506135	2.54033	Yeast
1526557	1.64086	Yeast
1595511	7.96044	Yeast
1324687	1.97907	Yeast
1447083	1.04619	Yeast
1529810	5.6489	Yeast
1392807	5.24478	Yeast
1482282	1.1724	Yeast
1530736	1.04099	Yeast
1538869	1.23856	Yeast
1540477	1.51873	Yeast
1554937	1.72134	Yeast
1480271	2.2926	Yeast
1543930	2.36935	Yeast
1350309	1.59316	Yeast
1365349	2.01973	Yeast
1369708	1.08563	Yeast
1384109	1.41419	Yeast
1456606	1.04155	Yeast
1466597	2.12124	Yeast
1494420	2.4682	Yeast
1510662	1.14761	Yeast
1542472	2.2692	Yeast
1512663	3.55693	Yeast
1515830	1.85795	Yeast
1541728	1.87279	Yeast
1553719	4.5607	Yeast
1506562	1.99936	Yeast
1460729	1.36907	Yeast
1488695	5.16813	Yeast
1508241	2.25363	Yeast
1511393	2.71029	Yeast
1497731	2.94764	Yeast
1527743	1.91833	Yeast
1538902	1.30686	Yeast
1456371	1.2888	Yeast
1454642	1.25519	Yeast
1477148	1.04363	Yeast
1561039	2.9603	Yeast
1485446	1.39526	Yeast
1531815	1.54737	Yeast
1546744	3.46648	Yeast
1364349	4.83814	Yeast
1376440	6.74417	Yeast
1506643	2.12405	Yeast
1566282	2.22304	Yeast
1374549	4.47452	Yeast
1379098	2.2852	Yeast
1497041	1.25394	Yeast
1429968	2.71583	Yeast
1446763	1.89075	Yeast
1491692	2.76624	Yeast
1492326	1.15399	Yeast
1533581	1.27949	Yeast
1468050	3.55554	Yeast
1541022	1.58301	Yeast
1376629	1.09878	Yeast
1494029	1.673	Yeast
1516197	9.41356	Yeast
1549940	1.79706	Yeast
1074123	6.52111	Yeast
1474119	1.30339	Yeast
1552664	2.72891	Yeast
1525635	5.49271	Yeast
1565747	1.86482	Yeast
1594670	2.12755	Yeast
1041163	3.52251	Yeast
1170661	2.06049	Yeast
1432641	1.47119	Yeast
1435521	3.36581	Yeast
1446378	2.64118	Yeast
1354589	1.61006	Yeast
1468066	1.49446	Yeast
1459789	2.5744	Yeast
1474227	1.23107	Yeast
1480919	2.83264	Yeast
1488557	1.80358	Yeast
1589999	6.96301	Yeast
1449775	3.04833	Yeast
1526613	2.54269	Yeast
1546953	1.59712	Yeast
1469315	4.15275	Yeast
1536395	1.6702	Yeast
1442352	6.92747	Yeast
1458022	6.43231	Yeast
1491431	1.75622	Yeast
1502080	2.5579	Yeast
1548536	1.29104	Yeast
1497461	1.33485	Yeast
1348106	6.82432	Yeast
1445145	3.47537	Yeast
1461956	1.38661	Yeast
1484409	2.96646	Yeast
1497946	1.64514	Yeast
1531865	2.12388	Yeast
1375836	3.64995	Yeast
1498940	2.11954	Yeast
1555440	1.94959	Yeast
1158964	2.87118	Yeast
1499258	2.31206	Yeast
1502090	1.11056	Yeast
1526262	1.09355	Yeast
1539479	1.69556	Yeast
1311202	1.52805	Yeast
1360275	1.37868	Yeast
1448557	1.36823	Yeast
1499874	3.10291	Yeast
1538148	1.74211	Yeast
1539792	1.24388	Yeast
1576503	3.20672	Yeast
1452214	4.09592	Yeast
1452702	1.76214	Yeast
1539826	1.16238	Yeast
1554798	1.872	Yeast
1372622	1.9254	Yeast
1516976	1.38267	Yeast
1543413	5.85482	Yeast
1343398	1.20413	Yeast
1335983	1.73159	Yeast
1442266	1.14723	Yeast
1475717	2.52508	Yeast
1478938	2.00701	Yeast
1506435	3.2887	Yeast
1500825	1.41827	Yeast
1513473	1.21342	Yeast
1596687	1.91156	Yeast
1012669	4.16147	Yeast
1507792	4.32984	Yeast
1385798	7.10241	Yeast
1465968	1.45105	Yeast
1546323	1.03312	Yeast
1578572	8.26105	Yeast
1389876	3.20961	Yeast
1456514	1.7739	Yeast
1477934	2.39212	Yeast
1487776	2.30026	Yeast
1494988	2.50412	Yeast
1498967	2.67076	Yeast
1480064	2.26864	Yeast
1445510	2.15853	Yeast
1513552	1.18567	Yeast
1525065	1.86669	Yeast
1455846	4.24692	Yeast
1523283	2.64431	Yeast
1551863	2.39598	Yeast
1533665	1.50341	Yeast
1458754	1.77997	Yeast
1481195	2.0025	Yeast
1482688	2.216	Yeast
1491545	1.70022	Yeast
1516375	1.02149	Yeast
1597086	2.77064	Yeast
1519792	3.23458	Yeast
1378249	2.18804	Yeast
1475623	2.75012	Yeast
1484566	2.89453	Yeast
1501350	2.28731	Yeast
1524153	3.84281	Yeast
1586659	2.06833	Yeast
1596279	2.08609	Yeast
1493939	1.26565	Yeast
1496428	2.77782	Yeast
1545472	2.47538	Yeast
1593957	2.77813	Yeast
1303736	1.62685	Yeast
1374243	1.51523	Yeast
1569326	5.66418	Yeast
1065447	5.45041	Yeast
1494635	1.66083	Yeast
1568087	3.77375	Yeast
1360481	2.9574	Yeast
1524906	1.13092	Yeast
1510579	2.70542	Yeast
1521024	2.06495	Yeast
1522761	1.54947	Yeast
1537332	1.2603	Yeast
1599055	1.79082	Yeast
1501689	2.64265	Yeast
1541952	1.42861	Yeast
1590312	1.11964	Yeast
1555884	2.02736	Yeast
1540880	1.47322	Yeast
1601195	3.4512	Yeast
1388477	5.9584	Yeast
1389761	2.5086	Yeast
1473650	2.78432	Yeast
1393798	1.79177	Yeast
1548844	1.35989	Yeast
1408048	1.85752	Yeast
1519035	1.15921	Yeast
1525316	1.13905	Yeast
1550399	1.26741	Yeast
1342374	2.49396	Yeast
1355596	2.54572	Yeast
1479957	1.69623	Yeast
1590354	4.27461	Yeast
1453132	2.52494	Yeast
1494501	2.70363	Yeast
1498052	2.5245	Yeast
1535117	3.02695	Yeast
1473341	1.11365	Yeast
1512122	1.24383	Yeast
1582539	3.00107	Yeast
1000774	1.42315	Yeast
1471653	2.12662	Yeast
1479771	1.69827	Yeast
1512587	5.01564	Yeast
1551066	1.0281	Yeast
1596776	2.07069	Yeast
1516614	1.10036	Yeast
1517232	2.87188	Yeast
1546569	1.21177	Yeast
1365517	1.22596	Yeast
1600525	2.86823	Yeast
1490047	1.15849	Yeast
1498493	1.89535	Yeast
1552366	1.16977	Yeast
1599902	1.19691	Yeast
1547842	5.03672	Yeast
1066876	1.51529	Yeast
1381695	2.80246	Yeast
1495543	3.54891	Yeast
1550311	2.7826	Yeast
1598591	1.0911	Yeast
1395404	1.01019	Yeast
1511775	5.75056	Yeast
1601209	1.78012	Yeast
1463211	1.55919	Yeast
1519253	2.29069	Yeast
1525371	1.59019	Yeast
1565273	1.94536	Yeast
1589198	3.24403	Yeast
1152264	2.8722	Yeast
1464312	2.6968	Yeast
1466411	2.29098	Yeast
1471537	1.90378	Yeast
1474160	4.13804	Yeast
1521876	5.42542	Yeast
1523928	6.95157	Yeast
1494836	1.17133	Yeast
1515258	1.97607	Yeast
1595174	3.51555	Yeast
1045599	3.16891	Yeast
1344666	3.27319	Yeast
1476866	2.63511	Yeast
1483776	3.68114	Yeast
1501186	1.45969	Yeast
1504365	2.53801	Yeast
1523372	1.98343	Yeast
1165760	2.97231	Yeast
1520042	3.56577	Yeast
1085134	2.18504	Yeast
1459618	1.20765	Yeast
1492288	3.0442	Yeast
1497243	3.39507	Yeast
1499207	3.38883	Yeast
1508657	2.60533	Yeast
1548028	2.61008	Yeast
1350616	1.09087	Yeast
1354038	1.73917	Yeast
1484017	2.47161	Yeast
1486164	1.13556	Yeast
1360022	2.36841	Yeast
1432037	3.22147	Yeast
1524253	3.56786	Yeast
1359571	4.12372	Yeast
1384651	4.49876	Yeast
1499204	1.79968	Yeast
1536239	1.12793	Yeast
1446165	1.24652	Yeast
1522972	5.16012	Yeast
1542591	1.82922	Yeast
1347822	3.0686	Yeast
1439343	1.72106	Yeast
1528481	1.01571	Yeast
1537483	4.79227	Yeast
1043754	3.22129	Yeast
1077628	3.08203	Yeast
1377429	1.82792	Yeast
1407661	4.58534	Yeast
1461561	3.49346	Yeast
1520332	7.03276	Yeast
1590748	1.09559	Yeast
1532954	1.61272	Yeast
1542357	1.93357	Yeast
1331398	5.79344	Yeast
1342711	2.45319	Yeast
1504631	1.01489	Yeast
1506159	4.35809	Yeast
1509426	2.98164	Yeast
1517149	4.95474	Yeast
1582507	1.69811	Yeast
1448200	4.26556	Yeast
1448331	3.49395	Yeast
1486351	1.61591	Yeast
1487426	6.16056	Yeast
1541548	1.26644	Yeast
1454083	1.43827	Yeast
1334502	2.58352	Yeast
1452978	2.12214	Yeast
1457537	1.29403	Yeast
1476931	4.62841	Yeast
1460610	1.44399	Yeast
1469947	2.1507	Yeast
1541364	1.55946	Yeast
1465946	1.67101	Yeast
1491583	1.60404	Yeast
1539904	3.51575	Yeast
1562843	4.61474	Yeast
1142553	4.37012	Yeast
1347452	1.84853	Yeast
1368463	3.86541	Yeast
1472930	1.04136	Yeast
1509553	2.32376	Yeast
1511318	1.40086	Yeast
1539816	1.62211	Yeast
1554438	1.98325	Yeast
1407619	3.37914	Yeast
1410375	2.95334	Yeast
1455762	2.6229	Yeast
1467865	2.01778	Yeast
1553073	4.08746	Yeast
1491389	1.15437	Yeast
1500129	2.84742	Yeast
1512774	1.53539	Yeast
1518994	1.85224	Yeast
1458457	1.79979	Yeast
1521510	1.88008	Yeast
1525238	3.14041	Yeast
1527131	2.72356	Yeast
1526457	1.57805	Yeast
1555914	2.80675	Yeast
1411518	4.13919	Yeast
1583426	1.81146	Yeast
1505659	1.1525	Yeast
1467507	2.51144	Yeast
1481679	1.95604	Yeast
1489878	1.87749	Yeast
1485669	1.38804	Yeast
1508401	2.73109	Yeast
1536058	4.55923	Yeast
1526361	2.53875	Yeast
1538665	1.08375	Yeast
1577111	2.32132	Yeast
1454558	1.91199	Yeast
1458727	1.13857	Yeast
1490377	2.72289	Yeast
1503379	1.31865	Yeast
1523168	1.96929	Yeast
1531798	2.36062	Yeast
1346373	1.62941	Yeast
1479639	2.2058	Yeast
1470195	4.99254	Yeast
1482728	1.67932	Yeast
1515216	1.24471	Yeast
1548664	1.2803	Yeast
1345227	1.09096	Yeast
1389995	1.49537	Yeast
1487786	1.05507	Yeast
1490375	6.27203	Yeast
1534247	1.25818	Yeast
1509699	1.68511	Yeast
1541431	1.24032	Yeast
1294740	1.01186	Yeast
1367006	2.09923	Yeast
1368112	1.29926	Yeast
1480645	1.75564	Yeast
1162314	2.54142	Yeast
1474953	2.78998	Yeast
1351441	6.73559	Yeast
1357245	6.15335	Yeast
1383337	1.41744	Yeast
1448348	3.9407	Yeast
1458306	2.4518	Yeast
1595470	1.03326	Yeast
1444037	4.06741	Yeast
1471942	1.95985	Yeast
1490708	2.92321	Yeast
1523042	1.83368	Yeast
1560760	4.66469	Yeast
1556994	3.58217	Yeast
1585851	3.16148	Yeast
1533378	3.11511	Yeast
1539822	1.37473	Yeast
1584109	2.20928	Yeast
1477490	1.63673	Yeast
1460357	1.63579	Yeast
1367826	5.83602	Yeast
1506711	2.63697	Yeast
1582667	2.26642	Yeast
1338814	4.7434	Yeast
1500024	3.64299	Yeast
1502144	1.39904	Yeast
1484351	2.87338	Yeast
1503237	2.41356	Yeast
1079374	2.13458	Yeast
1503636	2.46121	Yeast
1542774	1.2019	Yeast
1084071	1.46013	Yeast
1396361	1.68119	Yeast
1491760	1.9063	Yeast
1006928	1.19152	Yeast
1350683	1.8367	Yeast
1393057	1.08452	Yeast
1452983	1.13812	Yeast
1476281	3.73807	Yeast
1521209	1.28469	Yeast
1537230	1.28685	Yeast
1592234	1.26139	Yeast
1391816	2.82136	Yeast
1499826	1.69384	Yeast
1514501	4.72228	Yeast
1524147	2.64003	Yeast
1527875	2.82862	Yeast
1543209	1.78297	Yeast
1533407	1.94365	Yeast
1483497	2.32348	Yeast
1485471	2.32011	Yeast
1494462	1.92959	Yeast
1526283	2.70215	Yeast
1540193	3.51347	Yeast
1563853	1.85561	Yeast
1483982	1.30455	Yeast
1055668	3.1004	Yeast
1455114	2.54647	Yeast
1478363	2.23523	Yeast
1596404	2.02995	Yeast
1529059	1.32059	Yeast
1565792	2.57942	Yeast
1384061	1.41695	Yeast
1447039	1.61087	Yeast
1511238	2.41228	Yeast
1538346	1.23425	Yeast
1538476	1.50045	Yeast
1543410	1.79311	Yeast
1570876	1.95321	Yeast
1314402	1.38037	Yeast
1551976	4.20314	Yeast
1498434	3.36968	Yeast
1516468	2.70801	Yeast
1501272	1.35583	Yeast
1563606	2.89713	Yeast
1519044	1.73832	Yeast
1491681	1.22859	Yeast
1537364	3.50652	Yeast
1549732	3.01733	Yeast
1494703	3.00301	Yeast
1355971	2.82004	Yeast
1514461	1.89298	Yeast
1516624	1.11931	Yeast
1529997	1.02955	Yeast
1562080	1.03548	Yeast
1582908	2.20252	Yeast
1016976	1.43638	Yeast
1506005	1.79522	Yeast
1531371	6.1344	Yeast
1566026	3.95554	Yeast
1568343	1.40798	Yeast
1546840	2.56183	Yeast
1553541	1.42397	Yeast
1464744	2.20167	Yeast
1480201	5.80991	Yeast
1538633	1.29374	Yeast
1499609	1.44477	Yeast
1470825	2.38229	Yeast
1484737	5.07876	Yeast
1494823	1.32554	Yeast
1526068	2.6822	Yeast
1407587	2.60491	Yeast
1453117	2.52824	Yeast
1491206	2.70108	Yeast
1516247	1.33828	Yeast
1551615	2.8233	Yeast
1552208	1.21324	Yeast
1601348	1.28806	Yeast
1363063	1.49757	Yeast
1477875	2.23367	Yeast
[truncated: 915 more rows]
