# Supplementary material for: Coordinated Gene Family Evolution Shapes the Genome of Dimorphic Organisms
Source: Research Square preprint supplement (doi:10.21203/rs.3.rs-6393820/v1), 2025-04-08
Supplement: Supplementary file 8 [file d32015ca7b807422c8c8ea5e.xlsx]

## Sheet: Mycelium Genes
ID	Expression	Morfology
1447868	-6.80771	Mycelium
1362638	-2.02403	Mycelium
1445789	-1.66763	Mycelium
1392195	-6.57587	Mycelium
1461869	-4.75735	Mycelium
1377042	-6.49794	Mycelium
1390652	-3.19494	Mycelium
1539157	-2.82287	Mycelium
1598584	-1.9824	Mycelium
1356314	-1.79708	Mycelium
1493974	-5.54197	Mycelium
1374151	-7.89968	Mycelium
1484970	-2.78679	Mycelium
1546438	-4.23919	Mycelium
1588470	-2.43995	Mycelium
1585128	-2.21057	Mycelium
1482264	-4.74469	Mycelium
1542121	-2.3092	Mycelium
1475239	-2.06882	Mycelium
1496847	-2.0676	Mycelium
1488663	-2.88288	Mycelium
1384457	-1.80908	Mycelium
1490871	-1.28759	Mycelium
1597965	-2.76319	Mycelium
1527021	-8.90601	Mycelium
1361616	-7.4022	Mycelium
1586127	-6.56605	Mycelium
1375115	-2.59268	Mycelium
1391698	-1.19619	Mycelium
1497290	-4.88617	Mycelium
1543288	-1.6408	Mycelium
1448945	-2.68977	Mycelium
1491449	-1.14258	Mycelium
1544143	-1.13548	Mycelium
1470048	-3.53697	Mycelium
1479187	-6.93865	Mycelium
1599792	-1.86708	Mycelium
1481243	-2.64182	Mycelium
1592134	-1.36829	Mycelium
1373260	-2.91824	Mycelium
1516535	-1.18413	Mycelium
1524882	-1.77017	Mycelium
1396433	-2.89725	Mycelium
1501111	-4.14974	Mycelium
1468290	-5.26157	Mycelium
1504426	-3.7371	Mycelium
1505143	-1.62032	Mycelium
1393736	-7.22717	Mycelium
1359189	-1.46925	Mycelium
1530387	-1.43378	Mycelium
1530268	-1.89097	Mycelium
1518794	-2.22068	Mycelium
1548377	-2.64078	Mycelium
1566107	-3.00079	Mycelium
1386918	-4.21468	Mycelium
1550913	-2.30639	Mycelium
1500967	-3.03425	Mycelium
1449292	-1.01487	Mycelium
1374421	-3.55443	Mycelium
1459809	-2.20222	Mycelium
1555327	-2.54501	Mycelium
1493285	-1.36385	Mycelium
1494565	-2.23998	Mycelium
1536432	-2.08916	Mycelium
1512806	-1.19661	Mycelium
1597426	-1.76987	Mycelium
1465656	-6.00381	Mycelium
1473738	-1.8774	Mycelium
1537721	-2.82264	Mycelium
1357266	-1.91651	Mycelium
1462238	-1.14004	Mycelium
1546223	-1.02634	Mycelium
1600670	-2.7586	Mycelium
1416742	-1.17681	Mycelium
1556656	-5.82989	Mycelium
1354959	-3.80077	Mycelium
1367673	-1.78215	Mycelium
1505728	-1.53168	Mycelium
1543334	-2.54043	Mycelium
1584744	-6.53598	Mycelium
1464304	-1.25005	Mycelium
1487793	-2.48419	Mycelium
1465240	-3.21825	Mycelium
1511848	-3.57693	Mycelium
1471074	-1.97461	Mycelium
1520987	-1.06266	Mycelium
1526377	-1.46834	Mycelium
1527272	-7.2117	Mycelium
1527312	-6.29567	Mycelium
1471195	-4.82851	Mycelium
1474587	-2.92511	Mycelium
1524788	-2.25812	Mycelium
1551951	-1.11927	Mycelium
1503128	-3.85879	Mycelium
1548320	-2.23683	Mycelium
1557834	-1.58859	Mycelium
1593413	-3.75643	Mycelium
1355369	-3.0814	Mycelium
1509382	-1.84622	Mycelium
1391810	-1.34101	Mycelium
1003500	-4.38376	Mycelium
1554855	-2.31282	Mycelium
1321417	-6.07457	Mycelium
1106105	-5.49653	Mycelium
1506167	-1.13891	Mycelium
1324484	-1.76897	Mycelium
1575109	-8.02345	Mycelium
1583501	-4.53572	Mycelium
1354025	-1.21997	Mycelium
1520165	-3.29585	Mycelium
1497574	-2.24426	Mycelium
1515076	-5.83832	Mycelium
1520159	-2.65972	Mycelium
1542407	-3.97359	Mycelium
1587543	-7.96549	Mycelium
1465679	-2.37784	Mycelium
1466053	-3.24554	Mycelium
1503619	-2.6066	Mycelium
1530769	-1.55941	Mycelium
1548221	-1.62221	Mycelium
1441683	-2.34572	Mycelium
1556829	-2.196	Mycelium
1544666	-1.44964	Mycelium
1564581	-1.08483	Mycelium
1497478	-11.1448	Mycelium
1520335	-4.36178	Mycelium
1548713	-1.42157	Mycelium
1464935	-2.43533	Mycelium
1417931	-7.83873	Mycelium
1479497	-1.11727	Mycelium
1454092	-9.82709	Mycelium
1324426	-3.11499	Mycelium
1533932	-8.01045	Mycelium
1353435	-6.64232	Mycelium
1518232	-1.59268	Mycelium
1584753	-1.30068	Mycelium
1500684	-6.47152	Mycelium
1451834	-7.51199	Mycelium
1523568	-1.23319	Mycelium
1506181	-2.27732	Mycelium
1518127	-4.1534	Mycelium
1511327	-7.27616	Mycelium
1463491	-2.99633	Mycelium
1144010	-3.12068	Mycelium
1503785	-8.94494	Mycelium
1524941	-4.56753	Mycelium
1559080	-1.67097	Mycelium
1366719	-1.37546	Mycelium
1529084	-3.62628	Mycelium
1535223	-1.55362	Mycelium
1573597	-5.58011	Mycelium
1373133	-7.65677	Mycelium
1354524	-4.33777	Mycelium
1365840	-1.08934	Mycelium
1452939	-3.00656	Mycelium
1339505	-2.34645	Mycelium
1508379	-3.64474	Mycelium
1367223	-2.53645	Mycelium
1513949	-4.22203	Mycelium
1531586	-3.94074	Mycelium
1519041	-1.58442	Mycelium
1348301	-3.72397	Mycelium
1453569	-5.09133	Mycelium
1488326	-1.94017	Mycelium
1555071	-3.20291	Mycelium
1600961	-1.0008	Mycelium
1126324	-1.87229	Mycelium
1384248	-3.74682	Mycelium
1115782	-11.3621	Mycelium
1459294	-2.75809	Mycelium
1534936	-2.45982	Mycelium
1473065	-9.0781	Mycelium
1497352	-2.58766	Mycelium
1460957	-4.16479	Mycelium
1492313	-7.002	Mycelium
1494035	-3.38733	Mycelium
1480268	-1.5232	Mycelium
1566088	-1.55924	Mycelium
1464015	-6.75247	Mycelium
1514839	-2.84881	Mycelium
1510162	-1.13255	Mycelium
1596560	-7.01966	Mycelium
1486008	-3.23534	Mycelium
1510816	-1.17025	Mycelium
1469221	-1.62595	Mycelium
1544304	-1.26606	Mycelium
1584817	-5.23637	Mycelium
1362981	-1.35957	Mycelium
1447385	-1.03698	Mycelium
1447536	-2.81388	Mycelium
1458917	-3.34833	Mycelium
1498689	-3.23359	Mycelium
1480783	-2.20402	Mycelium
1540670	-5.93529	Mycelium
1546573	-8.93652	Mycelium
1319340	-2.45576	Mycelium
1457797	-1.37644	Mycelium
1385035	-3.33381	Mycelium
1531204	-4.63723	Mycelium
1510721	-1.6951	Mycelium
1537960	-6.26	Mycelium
1372401	-7.98863	Mycelium
1489672	-8.32856	Mycelium
1569679	-4.16387	Mycelium
1563383	-1.73236	Mycelium
1598287	-1.02016	Mycelium
1555734	-3.15871	Mycelium
1074021	-6.74277	Mycelium
1477568	-6.1423	Mycelium
1467875	-1.21042	Mycelium
1522499	-1.02425	Mycelium
1557876	-1.22193	Mycelium
1370913	-8.18666	Mycelium
1549372	-4.1795	Mycelium
1516145	-7.6775	Mycelium
1392991	-1.65483	Mycelium
1534363	-2.79536	Mycelium
1346507	-9.48893	Mycelium
1549544	-3.01826	Mycelium
1482501	-5.73214	Mycelium
1533533	-2.57541	Mycelium
1466266	-4.8129	Mycelium
1591901	-8.40084	Mycelium
1514924	-6.79058	Mycelium
1550141	-1.54711	Mycelium
1370343	-5.27074	Mycelium
1483648	-4.09714	Mycelium
1509260	-2.95284	Mycelium
1384767	-4.61966	Mycelium
1505536	-1.61104	Mycelium
1590549	-8.59949	Mycelium
1475249	-1.71232	Mycelium
1520688	-2.31733	Mycelium
1450694	-2.28232	Mycelium
1509783	-1.1259	Mycelium
1388821	-4.83536	Mycelium
1362081	-10.8134	Mycelium
1362083	-4.83029	Mycelium
1463599	-7.74427	Mycelium
1600512	-5.72931	Mycelium
1512432	-1.63727	Mycelium
1467407	-1.12713	Mycelium
1527777	-1.19835	Mycelium
1562467	-3.17953	Mycelium
1526201	-1.29293	Mycelium
1523594	-6.15916	Mycelium
1533317	-1.11183	Mycelium
1041319	-2.58906	Mycelium
1572680	-5.39837	Mycelium
1009515	-1.11627	Mycelium
1596977	-3.36983	Mycelium
1528369	-1.03923	Mycelium
1473219	-3.57585	Mycelium
1384257	-1.18116	Mycelium
1544072	-3.97927	Mycelium
1351166	-4.71804	Mycelium
1592582	-3.93569	Mycelium
1478342	-1.42238	Mycelium
1514747	-4.99363	Mycelium
1520126	-1.3874	Mycelium
1447828	-1.96853	Mycelium
1512527	-2.98325	Mycelium
1478332	-1.16292	Mycelium
1464774	-1.79798	Mycelium
1480199	-7.53311	Mycelium
1484801	-1.83339	Mycelium
1485083	-3.68425	Mycelium
1592585	-1.23195	Mycelium
1479203	-1.92624	Mycelium
1482616	-1.01015	Mycelium
1517016	-1.04893	Mycelium
1373392	-4.20456	Mycelium
1481294	-1.25974	Mycelium
1544675	-3.86404	Mycelium
1389670	-1.96061	Mycelium
1159667	-1.49841	Mycelium
1367862	-2.9448	Mycelium
1478896	-1.47698	Mycelium
1539249	-1.81692	Mycelium
1562381	-2.52995	Mycelium
1583336	-1.0593	Mycelium
1460663	-1.60778	Mycelium
1519912	-3.5545	Mycelium
1381524	-3.56197	Mycelium
1415883	-1.68049	Mycelium
1358140	-3.60183	Mycelium
1526608	-3.77836	Mycelium
1552111	-2.95678	Mycelium
1375399	-10.6912	Mycelium
1486502	-1.01613	Mycelium
1495537	-8.36532	Mycelium
1555563	-1.08599	Mycelium
1029637	-3.3024	Mycelium
1437973	-2.63992	Mycelium
1381900	-6.27146	Mycelium
1589336	-6.42171	Mycelium
1594191	-1.15085	Mycelium
1365138	-1.35067	Mycelium
1454016	-1.75144	Mycelium
1359273	-1.01029	Mycelium
1444752	-1.17605	Mycelium
1485415	-4.01448	Mycelium
1528165	-2.97699	Mycelium
1473161	-2.50591	Mycelium
1594720	-8.19887	Mycelium
1383244	-9.44058	Mycelium
1578751	-5.80496	Mycelium
1589529	-6.17856	Mycelium
1481447	-1.76428	Mycelium
1596619	-1.43104	Mycelium
1386453	-5.68328	Mycelium
1504306	-4.73071	Mycelium
1516079	-5.18018	Mycelium
1586462	-5.12972	Mycelium
1598347	-6.51246	Mycelium
1467026	-3.80587	Mycelium
1346223	-6.66039	Mycelium
1519225	-4.2943	Mycelium
1529156	-8.37562	Mycelium
1482333	-2.8753	Mycelium
1587034	-6.82791	Mycelium
1451753	-6.97808	Mycelium
1550550	-2.37077	Mycelium
1319860	-4.90767	Mycelium
1387697	-7.15552	Mycelium
1476540	-1.784	Mycelium
1588961	-1.99136	Mycelium
1457528	-1.83652	Mycelium
1595581	-1.76996	Mycelium
1386575	-5.26451	Mycelium
1530803	-4.24615	Mycelium
1598271	-1.77951	Mycelium
1533253	-7.57625	Mycelium
1537817	-3.31254	Mycelium
1601631	-4.44464	Mycelium
1555288	-1.54102	Mycelium
1575623	-7.64281	Mycelium
1594858	-2.07792	Mycelium
1375585	-2.29465	Mycelium
1491578	-2.9165	Mycelium
1497542	-4.95887	Mycelium
1473810	-1.45012	Mycelium
1533661	-1.77208	Mycelium
1557665	-5.96111	Mycelium
1442676	-1.268	Mycelium
1585058	-1.91351	Mycelium
1373776	-5.00655	Mycelium
1504756	-5.93587	Mycelium
1348192	-2.44283	Mycelium
1457102	-3.22943	Mycelium
1461850	-3.70873	Mycelium
1528692	-7.93778	Mycelium
1395861	-4.28626	Mycelium
1461143	-2.01548	Mycelium
1513820	-1.46623	Mycelium
1527416	-3.48502	Mycelium
1595586	-6.13145	Mycelium
1358663	-1.66413	Mycelium
1472410	-1.54963	Mycelium
1490508	-1.96344	Mycelium
1514164	-2.79755	Mycelium
1443806	-2.42923	Mycelium
1453614	-2.61832	Mycelium
1516482	-6.18681	Mycelium
1395496	-2.89368	Mycelium
1496199	-2.82674	Mycelium
1538864	-2.48435	Mycelium
1320314	-3.85891	Mycelium
1528698	-2.08269	Mycelium
1600237	-3.01164	Mycelium
1525042	-3.66044	Mycelium
1079491	-10.0511	Mycelium
1531102	-1.71214	Mycelium
1453515	-5.4231	Mycelium
1596438	-7.7838	Mycelium
1544154	-1.03642	Mycelium
1568076	-4.4263	Mycelium
1385235	-2.36034	Mycelium
1456642	-2.27444	Mycelium
1525127	-5.8537	Mycelium
1549305	-2.63104	Mycelium
1325012	-6.65241	Mycelium
1361949	-1.57575	Mycelium
1364873	-2.43677	Mycelium
1483141	-1.30183	Mycelium
1582312	-7.01118	Mycelium
1433443	-7.65185	Mycelium
1373480	-4.62476	Mycelium
1389923	-5.61379	Mycelium
1455318	-3.21944	Mycelium
1368227	-2.56633	Mycelium
1322923	-1.41851	Mycelium
1457743	-1.17754	Mycelium
1553583	-4.08321	Mycelium
1435031	-4.48184	Mycelium
1542350	-2.22741	Mycelium
1553865	-1.42673	Mycelium
1466382	-8.14877	Mycelium
1541087	-1.3013	Mycelium
1350552	-4.07105	Mycelium
1365027	-4.11509	Mycelium
1389636	-4.11769	Mycelium
1468170	-6.13745	Mycelium
1544003	-1.71202	Mycelium
1557113	-1.02244	Mycelium
1508382	-7.55428	Mycelium
1519360	-4.25818	Mycelium
1593326	-1.55436	Mycelium
1371914	-3.60099	Mycelium
1386076	-1.05205	Mycelium
1497566	-3.52226	Mycelium
1595034	-5.48745	Mycelium
1545806	-2.19352	Mycelium
1443321	-4.52706	Mycelium
1542506	-1.24606	Mycelium
1489916	-6.13542	Mycelium
1491293	-1.78929	Mycelium
1582517	-3.43989	Mycelium
1597341	-7.73112	Mycelium
1464414	-1.11652	Mycelium
1476131	-5.16288	Mycelium
1529873	-4.95033	Mycelium
1557467	-3.91951	Mycelium
1557646	-5.84095	Mycelium
1518325	-1.721	Mycelium
1557448	-2.97963	Mycelium
1383246	-5.38187	Mycelium
1455193	-4.97798	Mycelium
1484983	-1.8899	Mycelium
1490392	-3.62585	Mycelium
1530915	-4.18985	Mycelium
1391253	-1.45282	Mycelium
1449220	-2.77888	Mycelium
1525221	-1.44033	Mycelium
1390768	-3.1636	Mycelium
1598245	-2.09601	Mycelium
1446249	-2.31908	Mycelium
1601116	-1.6471	Mycelium
1514403	-1.14118	Mycelium
1594373	-3.27166	Mycelium
1513834	-4.32262	Mycelium
1487804	-6.76167	Mycelium
1554112	-1.95314	Mycelium
1376571	-7.09837	Mycelium
1596286	-3.00835	Mycelium
1347049	-1.0464	Mycelium
1367199	-7.58524	Mycelium
1482707	-10.9411	Mycelium
1498345	-1.118	Mycelium
1556540	-1.95703	Mycelium
1446491	-1.04944	Mycelium
1566725	-3.14786	Mycelium
1461671	-2.05843	Mycelium
1473635	-1.46613	Mycelium
1346383	-4.6968	Mycelium
1473385	-9.08139	Mycelium
1487265	-2.86049	Mycelium
1479794	-2.513	Mycelium
1489450	-1.2574	Mycelium
1543620	-1.93407	Mycelium
1365382	-7.31786	Mycelium
1536150	-3.29792	Mycelium
1453663	-2.61544	Mycelium
1548540	-9.34551	Mycelium
1443812	-2.12193	Mycelium
1459280	-2.38595	Mycelium
1507697	-2.2383	Mycelium
1018691	-5.79948	Mycelium
1467759	-1.27224	Mycelium
1498497	-1.00286	Mycelium
1537713	-4.43495	Mycelium
1351079	-1.63261	Mycelium
1361258	-5.99987	Mycelium
1509587	-2.20231	Mycelium
1534741	-2.26963	Mycelium
1566897	-1.43703	Mycelium
1413485	-4.63153	Mycelium
1476416	-3.06889	Mycelium
1509024	-1.52802	Mycelium
1518758	-4.48896	Mycelium
1583212	-4.0142	Mycelium
1469359	-1.63576	Mycelium
1503459	-1.84922	Mycelium
1552420	-3.22836	Mycelium
1571774	-1.07869	Mycelium
1359486	-1.23571	Mycelium
1488753	-3.52721	Mycelium
1530244	-5.99143	Mycelium
1553234	-1.41172	Mycelium
1323035	-5.98425	Mycelium
1357493	-3.88227	Mycelium
1516997	-6.76483	Mycelium
1500487	-1.00817	Mycelium
1452738	-8.27219	Mycelium
1537822	-3.99208	Mycelium
1467309	-2.61018	Mycelium
1452460	-2.24436	Mycelium
1599415	-1.82685	Mycelium
1486915	-3.09601	Mycelium
1319968	-9.36801	Mycelium
1468184	-10.9098	Mycelium
1349083	-3.09075	Mycelium
1381556	-7.1304	Mycelium
1509623	-1.88675	Mycelium
1333967	-2.06817	Mycelium
1360264	-6.5423	Mycelium
1479854	-2.10291	Mycelium
1515854	-2.58935	Mycelium
1547275	-8.24344	Mycelium
1507616	-1.04865	Mycelium
1564503	-1.60943	Mycelium
1591179	-7.87929	Mycelium
1471831	-8.43318	Mycelium
1463924	-9.07921	Mycelium
1477373	-1.17419	Mycelium
1596152	-1.16261	Mycelium
1394233	-2.54683	Mycelium
1456489	-1.40405	Mycelium
1515977	-6.2959	Mycelium
1492192	-2.24732	Mycelium
1565278	-1.94876	Mycelium
1527441	-1.23263	Mycelium
1531752	-2.1649	Mycelium
1475445	-1.64842	Mycelium
1502989	-2.1261	Mycelium
1512522	-1.861	Mycelium
1526154	-8.79651	Mycelium
1446075	-3.04123	Mycelium
1500586	-3.52547	Mycelium
1504786	-1.54004	Mycelium
1584148	-3.57444	Mycelium
1472659	-1.99492	Mycelium
1520864	-1.64296	Mycelium
1391247	-2.00219	Mycelium
1455312	-1.72109	Mycelium
1528032	-1.89464	Mycelium
1528476	-5.12181	Mycelium
1577904	-1.28871	Mycelium
1460757	-6.91249	Mycelium
1483235	-2.52126	Mycelium
1494617	-1.06799	Mycelium
1506452	-2.60466	Mycelium
1511098	-2.15662	Mycelium
1587640	-2.10619	Mycelium
1326411	-1.17478	Mycelium
1554857	-8.21757	Mycelium
1474926	-10.4218	Mycelium
1523036	-1.46296	Mycelium
1368475	-4.62995	Mycelium
1521047	-2.01002	Mycelium
1526230	-1.00084	Mycelium
1514408	-1.08158	Mycelium
1561442	-6.60407	Mycelium
1349946	-6.95091	Mycelium
1497304	-5.85596	Mycelium
1461672	-4.21007	Mycelium
1480634	-3.51451	Mycelium
1389450	-1.16908	Mycelium
1486266	-2.48136	Mycelium
1600907	-1.13679	Mycelium
1489723	-4.22807	Mycelium
1510371	-3.8643	Mycelium
1550236	-1.88459	Mycelium
1481053	-2.02028	Mycelium
1347010	-5.56355	Mycelium
1503780	-4.44635	Mycelium
1444358	-7.20687	Mycelium
1471963	-4.01478	Mycelium
1498542	-1.36016	Mycelium
1588946	-7.1761	Mycelium
1546606	-1.26725	Mycelium
1521990	-6.76194	Mycelium
1527940	-4.20165	Mycelium
1541429	-1.27212	Mycelium
1592666	-5.7145	Mycelium
1453576	-3.44374	Mycelium
1382021	-1.24698	Mycelium
1483414	-2.10317	Mycelium
1551958	-2.14246	Mycelium
1597032	-2.58163	Mycelium
1438082	-2.00279	Mycelium
1361204	-9.34306	Mycelium
1468741	-8.44229	Mycelium
1501522	-1.25656	Mycelium
1029479	-3.9078	Mycelium
1395629	-8.81098	Mycelium
1482274	-8.11064	Mycelium
1515926	-12.3825	Mycelium
1553630	-1.68717	Mycelium
1509401	-3.44346	Mycelium
1376907	-7.12426	Mycelium
1156345	-3.37795	Mycelium
1579623	-3.47638	Mycelium
1360061	-3.49179	Mycelium
1518300	-1.18641	Mycelium
1543176	-1.69461	Mycelium
1534150	-4.78984	Mycelium
1556949	-1.73752	Mycelium
1564680	-8.40145	Mycelium
1575150	-8.35641	Mycelium
1363237	-2.65156	Mycelium
1509316	-1.03098	Mycelium
1526584	-3.26864	Mycelium
1601469	-4.03057	Mycelium
1351582	-2.53695	Mycelium
1595125	-2.06702	Mycelium
1596305	-2.9487	Mycelium
1148843	-3.52472	Mycelium
1490916	-3.04239	Mycelium
1542523	-4.38397	Mycelium
1593578	-8.00173	Mycelium
1464797	-2.10481	Mycelium
1477165	-5.97565	Mycelium
1461625	-2.93761	Mycelium
1504990	-1.91002	Mycelium
1517004	-6.56469	Mycelium
1534662	-1.20363	Mycelium
1584919	-4.87373	Mycelium
1388684	-8.04589	Mycelium
1462606	-2.32367	Mycelium
1499225	-1.00089	Mycelium
1502021	-1.71234	Mycelium
1510043	-2.66014	Mycelium
1454930	-1.52569	Mycelium
1534919	-1.18603	Mycelium
1562600	-4.13983	Mycelium
1599666	-5.83616	Mycelium
1474672	-5.39507	Mycelium
1537036	-2.88381	Mycelium
1453634	-5.57892	Mycelium
1451201	-4.02525	Mycelium
1588502	-8.1089	Mycelium
1353007	-9.9533	Mycelium
1353013	-9.27542	Mycelium
1481799	-4.21366	Mycelium
1369598	-1.11334	Mycelium
1595018	-1.51641	Mycelium
1462044	-1.79497	Mycelium
1462573	-3.07818	Mycelium
1486885	-1.25521	Mycelium
1495154	-1.76545	Mycelium
1351740	-3.01574	Mycelium
1479643	-6.90858	Mycelium
1597266	-2.10239	Mycelium
1458615	-1.09536	Mycelium
1488876	-1.0958	Mycelium
1525119	-1.60312	Mycelium
1542521	-4.14079	Mycelium
1544446	-1.43194	Mycelium
1461395	-2.86991	Mycelium
1486525	-3.39026	Mycelium
1586608	-8.0432	Mycelium
1443495	-1.32923	Mycelium
1351971	-5.33944	Mycelium
1477596	-6.41935	Mycelium
1457466	-3.75715	Mycelium
1531515	-2.26577	Mycelium
1588845	-3.36593	Mycelium
1454005	-1.90896	Mycelium
1480700	-1.78296	Mycelium
1511317	-9.71661	Mycelium
1090090	-1.76017	Mycelium
1450516	-1.63142	Mycelium
1517218	-2.13474	Mycelium
1470431	-1.59428	Mycelium
1471220	-1.08449	Mycelium
1431341	-1.18775	Mycelium
1454471	-7.33613	Mycelium
1378572	-10.8585	Mycelium
1460646	-7.26707	Mycelium
1485973	-7.43584	Mycelium
1550370	-9.01195	Mycelium
1555378	-5.03186	Mycelium
1380357	-3.15209	Mycelium
1509309	-2.73569	Mycelium
1547832	-1.12819	Mycelium
1553967	-1.98112	Mycelium
1599059	-3.25946	Mycelium
1493407	-5.16789	Mycelium
1396454	-3.64511	Mycelium
1335846	-5.07327	Mycelium
1554882	-1.24798	Mycelium
1132586	-2.9443	Mycelium
1385889	-6.13161	Mycelium
1395292	-8.64199	Mycelium
1451843	-1.17193	Mycelium
1453776	-6.25184	Mycelium
1345409	-3.49693	Mycelium
1547765	-1.17766	Mycelium
1557143	-1.49014	Mycelium
1472378	-4.62235	Mycelium
1571274	-6.66592	Mycelium
1593501	-9.96787	Mycelium
1475458	-7.34912	Mycelium
1527407	-3.97291	Mycelium
1366356	-1.60729	Mycelium
1506663	-1.332	Mycelium
1354001	-1.3023	Mycelium
1365718	-1.32292	Mycelium
1524418	-1.01097	Mycelium
1475228	-2.12835	Mycelium
1519193	-1.0206	Mycelium
1534994	-2.05442	Mycelium
1444183	-3.5073	Mycelium
1534217	-2.81562	Mycelium
1508544	-2.92194	Mycelium
1569097	-6.28662	Mycelium
1456632	-2.02999	Mycelium
1465397	-3.75597	Mycelium
1479208	-4.9274	Mycelium
1463314	-1.83259	Mycelium
1477295	-1.37335	Mycelium
1500712	-9.23755	Mycelium
1347570	-1.97001	Mycelium
1567025	-1.63452	Mycelium
1549495	-1.20486	Mycelium
1574611	-3.53201	Mycelium
1533160	-3.74732	Mycelium
1596435	-1.62602	Mycelium
1377156	-1.82502	Mycelium
1350209	-6.21166	Mycelium
1382617	-7.7059	Mycelium
1511347	-4.01944	Mycelium
1583890	-7.85394	Mycelium
1468873	-2.39565	Mycelium
1593427	-5.48222	Mycelium
1008270	-1.12047	Mycelium
1368542	-3.57149	Mycelium
1382732	-1.78155	Mycelium
1454548	-2.42872	Mycelium
1561253	-2.63125	Mycelium
1383286	-8.67126	Mycelium
1537462	-3.06439	Mycelium
1459565	-6.28752	Mycelium
1477099	-1.28014	Mycelium
1472681	-2.12944	Mycelium
1583730	-1.73152	Mycelium
1598382	-1.87609	Mycelium
1359379	-1.43442	Mycelium
1597347	-1.75094	Mycelium
1474666	-5.22085	Mycelium
1462169	-3.53632	Mycelium
1577954	-1.91621	Mycelium
1374048	-5.76439	Mycelium
1500105	-4.95802	Mycelium
1537552	-1.87474	Mycelium
1372523	-5.90407	Mycelium
1496361	-1.64065	Mycelium
1587196	-1.24239	Mycelium
1529872	-1.05256	Mycelium
1540940	-2.20714	Mycelium
1347922	-1.46275	Mycelium
1544569	-1.85997	Mycelium
1505298	-3.21324	Mycelium
1389865	-3.07732	Mycelium
1365180	-3.55695	Mycelium
1458934	-1.73076	Mycelium
1505132	-3.95332	Mycelium
1545731	-4.69758	Mycelium
1359344	-2.3553	Mycelium
1479113	-4.45272	Mycelium
1464393	-6.11769	Mycelium
1352372	-7.03478	Mycelium
1494808	-5.82985	Mycelium
1533916	-3.3077	Mycelium
1086198	-1.37353	Mycelium
1174548	-1.05206	Mycelium
1478208	-5.86839	Mycelium
1481772	-4.25828	Mycelium
1522411	-4.11608	Mycelium
1532375	-7.74577	Mycelium
1453992	-7.52907	Mycelium
1471849	-1.12383	Mycelium
1561469	-1.17362	Mycelium
1337482	-10.5956	Mycelium
1458211	-4.41909	Mycelium
1487345	-3.09042	Mycelium
1544203	-1.08028	Mycelium
1506587	-2.47854	Mycelium
1546453	-8.02995	Mycelium
1460641	-5.21677	Mycelium
1470027	-3.34274	Mycelium
1379918	-2.33804	Mycelium
1467304	-1.65979	Mycelium
1484826	-1.53712	Mycelium
1499053	-4.59824	Mycelium
1508224	-3.04379	Mycelium
1517701	-8.37039	Mycelium
1518983	-3.16164	Mycelium
1395610	-6.43944	Mycelium
1457883	-3.97555	Mycelium
1479353	-6.61706	Mycelium
1564778	-5.6066	Mycelium
1485486	-4.92206	Mycelium
1541792	-4.37106	Mycelium
1550122	-1.33636	Mycelium
1544031	-1.42063	Mycelium
1546727	-2.02424	Mycelium
1350034	-3.943	Mycelium
1390373	-2.5974	Mycelium
1476912	-1.69445	Mycelium
1566968	-1.04982	Mycelium
1484609	-4.56425	Mycelium
1582751	-2.30871	Mycelium
1542483	-1.89625	Mycelium
1349448	-9.80041	Mycelium
1395884	-6.83767	Mycelium
1595331	-6.69292	Mycelium
1341565	-4.87327	Mycelium
1371527	-2.92419	Mycelium
1487284	-2.09511	Mycelium
1481419	-4.04133	Mycelium
1502245	-1.07509	Mycelium
1540362	-4.5519	Mycelium
1055566	-1.52943	Mycelium
1381006	-3.5135	Mycelium
1599803	-6.55771	Mycelium
1412731	-3.18157	Mycelium
1530130	-1.72073	Mycelium
1596907	-4.76503	Mycelium
1478500	-4.24052	Mycelium
1538766	-2.16716	Mycelium
1552014	-4.16066	Mycelium
1552029	-6.32811	Mycelium
1488461	-5.74128	Mycelium
1555847	-2.51522	Mycelium
1526436	-2.73777	Mycelium
1475449	-1.35797	Mycelium
1532173	-1.98745	Mycelium
1124575	-8.01799	Mycelium
1451517	-7.62248	Mycelium
1472995	-1.08421	Mycelium
1557900	-2.87762	Mycelium
1546377	-1.16451	Mycelium
1322460	-5.78837	Mycelium
1450618	-3.20021	Mycelium
1354963	-1.77813	Mycelium
1544051	-3.22825	Mycelium
1464336	-2.50399	Mycelium
1502125	-2.94198	Mycelium
1516339	-10.7693	Mycelium
1467506	-5.53355	Mycelium
1548815	-1.92749	Mycelium
1381769	-8.02037	Mycelium
1450179	-5.12874	Mycelium
1507170	-3.696	Mycelium
1527608	-5.65752	Mycelium
1458012	-4.7348	Mycelium
1477271	-1.51547	Mycelium
1509721	-4.28586	Mycelium
1445525	-2.6435	Mycelium
1486670	-1.90331	Mycelium
1543725	-5.46351	Mycelium
1601212	-6.58753	Mycelium
1530273	-4.55039	Mycelium
1359682	-4.98245	Mycelium
1366113	-5.67649	Mycelium
1390582	-1.89373	Mycelium
1470437	-1.42273	Mycelium
1512068	-5.357	Mycelium
1544059	-1.84576	Mycelium
1478934	-4.6779	Mycelium
1490437	-6.51479	Mycelium
1512500	-2.88132	Mycelium
1514624	-4.60526	Mycelium
1518302	-1.07514	Mycelium
1357394	-2.24149	Mycelium
1506327	-1.19926	Mycelium
1487441	-1.79494	Mycelium
1349107	-1.92839	Mycelium
1470620	-3.62926	Mycelium
1493662	-6.42211	Mycelium
1511764	-5.46463	Mycelium
1570409	-4.14218	Mycelium
1532410	-7.56927	Mycelium
1373181	-1.10869	Mycelium
1506846	-1.55302	Mycelium
1468748	-6.76626	Mycelium
1487262	-7.83317	Mycelium
1508859	-4.03007	Mycelium
1515040	-4.71116	Mycelium
1521296	-1.48537	Mycelium
1525053	-5.8907	Mycelium
1531060	-3.40268	Mycelium
1545922	-3.54842	Mycelium
1541708	-2.2171	Mycelium
1330980	-3.2887	Mycelium
1319384	-4.98692	Mycelium
1449495	-1.44781	Mycelium
1474215	-4.95366	Mycelium
1496978	-4.09646	Mycelium
1522160	-6.17863	Mycelium
1514140	-1.413	Mycelium
1544631	-5.00096	Mycelium
1589592	-10.2565	Mycelium
1363816	-2.23506	Mycelium
1475199	-3.70813	Mycelium
1477078	-2.73522	Mycelium
1031666	-3.1649	Mycelium
1345849	-2.39072	Mycelium
1489280	-1.98233	Mycelium
1461086	-1.50539	Mycelium
1489430	-1.59676	Mycelium
1448191	-4.63696	Mycelium
1510534	-7.52217	Mycelium
1578296	-3.57781	Mycelium
1554288	-2.44414	Mycelium
1474509	-1.31748	Mycelium
1455657	-1.02905	Mycelium
1500854	-1.54262	Mycelium
1509213	-6.28894	Mycelium
1522251	-2.36551	Mycelium
1523031	-1.39674	Mycelium
1523996	-3.31476	Mycelium
1375147	-6.43731	Mycelium
1381090	-2.57952	Mycelium
1455676	-5.06261	Mycelium
1512349	-1.09989	Mycelium
1454398	-3.86273	Mycelium
1496889	-1.90684	Mycelium
1502983	-1.6985	Mycelium
1515029	-3.15694	Mycelium
1470767	-2.01795	Mycelium
1522434	-7.28524	Mycelium
1054703	-4.38946	Mycelium
1348131	-8.8449	Mycelium
1395857	-8.69879	Mycelium
1457357	-1.18651	Mycelium
1451144	-5.76135	Mycelium
1527089	-1.8034	Mycelium
1528630	-5.67035	Mycelium
1344098	-8.3614	Mycelium
1473889	-3.41743	Mycelium
1373222	-2.73894	Mycelium
1476547	-2.80584	Mycelium
1550104	-1.95665	Mycelium
1585180	-7.6937	Mycelium
1586772	-3.1987	Mycelium
1151236	-6.91506	Mycelium
1379184	-3.87898	Mycelium
1363977	-10.5193	Mycelium
1388883	-8.6645	Mycelium
1471233	-2.57818	Mycelium
1492602	-8.3806	Mycelium
1548871	-1.15371	Mycelium
1496327	-4.7196	Mycelium
1551716	-2.44929	Mycelium
1578668	-2.96583	Mycelium
1392687	-3.85874	Mycelium
1592193	-3.88226	Mycelium
1334891	-3.24305	Mycelium
1383729	-1.39107	Mycelium
1519133	-1.7146	Mycelium
1453722	-5.63157	Mycelium
1455401	-1.90851	Mycelium
1465479	-2.03449	Mycelium
1473564	-1.24318	Mycelium
1528351	-1.92644	Mycelium
1531626	-2.09519	Mycelium
1517122	-1.05277	Mycelium
1409111	-2.90141	Mycelium
1457686	-1.08628	Mycelium
1476642	-1.43309	Mycelium
1517252	-1.82139	Mycelium
1543918	-7.35573	Mycelium
1553732	-2.07497	Mycelium
1482283	-1.45984	Mycelium
1492669	-2.84254	Mycelium
1342161	-7.97466	Mycelium
1508769	-4.91764	Mycelium
1582474	-2.88201	Mycelium
1467693	-5.61786	Mycelium
1595218	-3.54011	Mycelium
1525774	-7.76939	Mycelium
1543456	-6.4826	Mycelium
1599758	-2.02905	Mycelium
1356982	-1.33474	Mycelium
1351177	-1.45348	Mycelium
1372654	-1.44492	Mycelium
1457194	-1.04647	Mycelium
1482781	-1.6038	Mycelium
1508749	-2.54159	Mycelium
1515118	-1.89464	Mycelium
1590398	-2.49238	Mycelium
1391159	-1.23929	Mycelium
1409830	-9.25271	Mycelium
1468406	-1.75987	Mycelium
1532507	-2.11634	Mycelium
1503693	-1.46151	Mycelium
1583309	-6.55758	Mycelium
1598074	-6.63018	Mycelium
1378062	-1.15998	Mycelium
1374693	-7.67963	Mycelium
1600328	-4.51814	Mycelium
1477598	-3.5253	Mycelium
1489845	-1.08474	Mycelium
1514864	-1.62572	Mycelium
1381758	-4.45436	Mycelium
1475834	-1.41595	Mycelium
1596900	-6.82973	Mycelium
1473364	-11.2741	Mycelium
1505811	-1.38268	Mycelium
1466334	-5.12928	Mycelium
1598513	-1.12281	Mycelium
1165324	-2.43394	Mycelium
1522552	-7.26461	Mycelium
1476754	-8.42537	Mycelium
1587351	-11.6753	Mycelium
1453269	-6.73798	Mycelium
1127229	-6.40773	Mycelium
1442407	-3.09596	Mycelium
1456923	-5.98502	Mycelium
1495540	-8.34537	Mycelium
1554959	-2.22909	Mycelium
1514118	-3.17483	Mycelium
1528612	-2.17731	Mycelium
1528810	-7.75735	Mycelium
1537654	-1.2641	Mycelium
1433203	-7.40173	Mycelium
1540278	-4.65257	Mycelium
1348115	-1.09916	Mycelium
1363415	-1.77343	Mycelium
1528036	-6.44009	Mycelium
1546372	-1.17918	Mycelium
1601669	-2.98994	Mycelium
1551405	-6.26364	Mycelium
1326131	-6.27804	Mycelium
1393696	-8.28774	Mycelium
1453495	-1.62465	Mycelium
1483228	-8.74153	Mycelium
1453998	-9.44121	Mycelium
1597095	-6.10282	Mycelium
1569495	-3.70215	Mycelium
1513802	-7.03151	Mycelium
1531718	-7.6595	Mycelium
1347525	-5.04128	Mycelium
1473020	-1.41659	Mycelium
1461057	-1.53689	Mycelium
1481706	-3.80638	Mycelium
1496380	-1.62567	Mycelium
1502628	-1.33224	Mycelium
1516818	-3.69904	Mycelium
1593109	-4.95216	Mycelium
1351437	-1.46211	Mycelium
1469197	-1.37183	Mycelium
1504602	-2.59267	Mycelium
1540750	-4.94397	Mycelium
1552115	-1.24448	Mycelium
1523285	-1.48887	Mycelium
1502239	-4.27458	Mycelium
1504151	-3.565	Mycelium
1513990	-6.25556	Mycelium
1019783	-9.58523	Mycelium
1482414	-2.52037	Mycelium
1392716	-5.72496	Mycelium
1448895	-3.13247	Mycelium
1482455	-2.3251	Mycelium
1497317	-6.63573	Mycelium
1375469	-6.72753	Mycelium
1380211	-7.61915	Mycelium
1379339	-1.24048	Mycelium
1451738	-5.18659	Mycelium
1493009	-3.37577	Mycelium
1493849	-2.3322	Mycelium
1502735	-4.45349	Mycelium
1509123	-3.05241	Mycelium
1594000	-3.24095	Mycelium
1455501	-5.42497	Mycelium
1509909	-1.58109	Mycelium
1545795	-1.92638	Mycelium
1560761	-2.58753	Mycelium
1591299	-5.6237	Mycelium
1161390	-7.3371	Mycelium
1458586	-3.66551	Mycelium
1543084	-1.96413	Mycelium
1521864	-2.20428	Mycelium
1534455	-1.61671	Mycelium
1128859	-3.88506	Mycelium
1471544	-6.83811	Mycelium
1593168	-1.93173	Mycelium
1498536	-4.78567	Mycelium
1594213	-4.66157	Mycelium
1595400	-3.74186	Mycelium
1169234	-1.538	Mycelium
1328137	-2.30091	Mycelium
1469302	-8.3976	Mycelium
1444527	-7.03517	Mycelium
1485491	-1.71531	Mycelium
1541836	-5.56874	Mycelium
1455290	-5.53663	Mycelium
1455764	-4.09224	Mycelium
1511360	-1.74535	Mycelium
1520052	-2.06297	Mycelium
1533263	-2.01547	Mycelium
1164253	-7.52515	Mycelium
1465858	-4.55842	Mycelium
1479258	-2.48193	Mycelium
1544135	-1.2663	Mycelium
1582568	-3.87112	Mycelium
1176600	-2.97309	Mycelium
1597303	-7.03543	Mycelium
1353063	-4.75337	Mycelium
1482659	-2.18671	Mycelium
1563956	-1.78091	Mycelium
1532793	-4.5022	Mycelium
1361146	-5.98757	Mycelium
1575171	-8.66764	Mycelium
1584924	-9.22441	Mycelium
1445692	-2.22194	Mycelium
1457119	-3.22757	Mycelium
1463871	-1.72947	Mycelium
1481600	-2.59038	Mycelium
1537999	-3.35113	Mycelium
1494052	-2.00865	Mycelium
1460464	-2.05389	Mycelium
1541805	-3.462	Mycelium
1555750	-3.66857	Mycelium
1392593	-5.27383	Mycelium
1489517	-1.01556	Mycelium
1517688	-1.11084	Mycelium
1524758	-1.24895	Mycelium
1576665	-5.12407	Mycelium
1578977	-8.43444	Mycelium
1594941	-5.562	Mycelium
1474406	-1.84981	Mycelium
1520470	-5.41951	Mycelium
1528818	-1.75506	Mycelium
1539671	-2.15561	Mycelium
1593084	-7.89323	Mycelium
1601755	-6.38082	Mycelium
1365250	-1.92783	Mycelium
1382140	-1.51588	Mycelium
1462414	-1.58859	Mycelium
1493865	-1.22303	Mycelium
1494920	-4.35203	Mycelium
1521100	-1.12833	Mycelium
1535316	-1.96036	Mycelium
1462408	-1.26523	Mycelium
1492436	-4.83402	Mycelium
1500084	-1.28921	Mycelium
1535000	-1.02468	Mycelium
1566321	-6.42993	Mycelium
1571215	-9.98612	Mycelium
1585975	-3.93239	Mycelium
1362506	-1.25043	Mycelium
1488953	-5.38075	Mycelium
1503770	-2.81919	Mycelium
1565022	-7.28634	Mycelium
1569885	-6.90928	Mycelium
1511890	-1.88462	Mycelium
1536093	-4.22736	Mycelium
1510106	-1.48445	Mycelium
1540005	-2.83431	Mycelium
1546050	-2.36402	Mycelium
1447312	-2.20734	Mycelium
1353121	-1.79691	Mycelium
1410471	-8.19327	Mycelium
1470386	-3.79477	Mycelium
1481426	-9.47341	Mycelium
1487600	-1.25263	Mycelium
1346779	-1.97968	Mycelium
1383483	-3.00467	Mycelium
1462743	-1.06046	Mycelium
1522210	-3.52961	Mycelium
1566228	-1.82683	Mycelium
1461402	-2.81605	Mycelium
1465138	-9.20035	Mycelium
1506737	-1.9945	Mycelium
1514203	-1.78216	Mycelium
1530345	-3.87108	Mycelium
1455227	-3.52353	Mycelium
1457533	-1.58622	Mycelium
1347700	-4.8654	Mycelium
1394386	-1.09012	Mycelium
1495645	-3.38542	Mycelium
1501738	-1.5597	Mycelium
1542977	-9.97012	Mycelium
1546442	-2.09698	Mycelium
1360452	-6.50363	Mycelium
1460128	-2.25947	Mycelium
1463294	-1.62259	Mycelium
1490477	-2.21683	Mycelium
1359484	-2.1177	Mycelium
1363928	-1.82146	Mycelium
1472618	-1.37392	Mycelium
1508505	-3.74453	Mycelium
1580227	-3.3502	Mycelium
1446755	-2.5206	Mycelium
1472337	-2.2092	Mycelium
1517516	-6.00397	Mycelium
1521536	-1.28202	Mycelium
1540964	-1.30259	Mycelium
1555746	-1.20837	Mycelium
1572278	-4.7283	Mycelium
1357832	-3.70911	Mycelium
1459204	-6.83621	Mycelium
1472690	-1.15254	Mycelium
1484963	-1.92201	Mycelium
1499263	-4.77697	Mycelium
1543406	-5.5513	Mycelium
1569662	-5.26028	Mycelium
1377522	-3.89735	Mycelium
1493858	-5.79275	Mycelium
1550067	-1.8908	Mycelium
1572281	-7.76926	Mycelium
1353746	-5.17117	Mycelium
1356380	-5.94302	Mycelium
1363262	-1.42953	Mycelium
1378586	-6.76711	Mycelium
1362225	-2.03265	Mycelium
1484050	-1.86943	Mycelium
1524594	-8.11144	Mycelium
1394652	-2.18353	Mycelium
1463020	-6.52428	Mycelium
1480355	-1.53199	Mycelium
1492697	-8.93368	Mycelium
1493149	-1.18698	Mycelium
1495571	-1.45844	Mycelium
1337379	-1.8031	Mycelium
1348871	-8.9984	Mycelium
1487590	-3.7086	Mycelium
1513864	-4.56125	Mycelium
1513926	-4.7475	Mycelium
1550163	-4.58087	Mycelium
1572414	-5.40733	Mycelium
1487968	-2.10004	Mycelium
1488549	-2.94422	Mycelium
1459140	-1.25877	Mycelium
1506153	-1.24595	Mycelium
1373746	-7.71089	Mycelium
1381038	-1.22686	Mycelium
1387838	-2.9696	Mycelium
1549534	-1.91814	Mycelium
1555142	-5.80247	Mycelium
1413418	-3.73916	Mycelium
1468417	-4.29743	Mycelium
1482749	-1.34561	Mycelium
1490130	-1.95895	Mycelium
1558686	-6.76845	Mycelium
1576699	-3.23575	Mycelium
1597088	-3.56058	Mycelium
1594130	-4.98178	Mycelium
1369475	-13.8463	Mycelium
1369983	-7.35802	Mycelium
1394330	-1.19516	Mycelium
1433212	-7.41284	Mycelium
1448896	-5.10947	Mycelium
1468356	-2.62785	Mycelium
1486817	-1.01008	Mycelium
1466422	-1.29894	Mycelium
1504804	-1.16557	Mycelium
1522728	-2.23622	Mycelium
1528472	-6.32573	Mycelium
1471857	-5.26657	Mycelium
1497344	-5.06911	Mycelium
1507244	-5.29508	Mycelium
1516139	-3.29188	Mycelium
1597002	-7.23639	Mycelium
1577180	-5.34483	Mycelium
1460415	-1.68313	Mycelium
1466586	-1.13148	Mycelium
1481899	-1.42611	Mycelium
1593638	-8.3625	Mycelium
1373553	-1.49362	Mycelium
1468849	-3.99291	Mycelium
1489493	-2.29668	Mycelium
1435320	-1.42834	Mycelium
1455360	-1.65066	Mycelium
1459378	-2.78373	Mycelium
1466056	-2.09903	Mycelium
1496226	-3.6818	Mycelium
1510886	-4.32566	Mycelium
1540588	-1.81662	Mycelium
1034771	-1.36298	Mycelium
1545542	-1.41924	Mycelium
1464949	-3.37773	Mycelium
1571759	-4.07233	Mycelium
1442768	-2.13481	Mycelium
1448560	-1.59157	Mycelium
1477799	-1.46606	Mycelium
1525918	-1.11129	Mycelium
1529552	-5.67071	Mycelium
1572482	-2.76578	Mycelium
1373983	-1.5224	Mycelium
1461192	-3.44581	Mycelium
1461584	-1.86661	Mycelium
1418051	-5.69431	Mycelium
1446091	-4.60794	Mycelium
1487342	-3.77582	Mycelium
1585462	-4.65805	Mycelium
1476147	-4.76128	Mycelium
1488435	-2.10453	Mycelium
1468964	-2.20088	Mycelium
1534282	-3.64207	Mycelium
1341530	-1.8078	Mycelium
1453091	-1.56075	Mycelium
1542402	-2.36796	Mycelium
1364809	-7.09143	Mycelium
1368652	-7.15636	Mycelium
1469931	-1.47105	Mycelium
1506014	-1.49003	Mycelium
1528331	-2.49497	Mycelium
1547020	-2.01347	Mycelium
1586123	-1.39952	Mycelium
1588108	-2.05707	Mycelium
1599618	-4.08536	Mycelium
1147952	-1.59191	Mycelium
1354233	-1.56163	Mycelium
1491636	-1.94283	Mycelium
1536446	-7.0342	Mycelium
1396117	-3.21942	Mycelium
1475866	-2.46889	Mycelium
1553228	-6.8077	Mycelium
1564111	-1.03793	Mycelium
1485215	-3.03243	Mycelium
1350752	-3.04367	Mycelium
1536729	-2.90914	Mycelium
1566709	-1.53616	Mycelium
1461833	-3.25738	Mycelium
1497398	-9.36474	Mycelium
1457107	-3.25692	Mycelium
1506854	-2.39937	Mycelium
1450394	-1.91244	Mycelium
1516043	-1.62661	Mycelium
1475880	-4.77731	Mycelium
1494781	-3.5281	Mycelium
1509827	-1.59613	Mycelium
1547824	-1.02535	Mycelium
1369466	-4.28649	Mycelium
1377508	-5.20475	Mycelium
1477496	-2.16504	Mycelium
1482230	-4.51944	Mycelium
1501533	-2.51179	Mycelium
1503950	-2.01502	Mycelium
1524773	-7.04796	Mycelium
1555570	-1.82528	Mycelium
1483665	-2.3456	Mycelium
1339278	-8.02758	Mycelium
1552466	-1.7687	Mycelium
1355139	-8.93556	Mycelium
1600533	-9.72502	Mycelium
1517075	-1.90882	Mycelium
1521186	-3.32988	Mycelium
1580414	-8.38396	Mycelium
1319647	-4.05985	Mycelium
1463130	-1.93014	Mycelium
1537158	-3.42822	Mycelium
1489690	-1.62674	Mycelium
1520899	-3.56592	Mycelium
1575469	-5.9309	Mycelium
1493910	-2.05035	Mycelium
1504596	-2.48197	Mycelium
1351920	-4.17737	Mycelium
1596022	-1.59821	Mycelium
1531690	-2.14082	Mycelium
1555889	-3.42567	Mycelium
1329057	-5.34855	Mycelium
1385076	-2.17803	Mycelium
1486545	-1.06578	Mycelium
1498854	-8.03062	Mycelium
1551947	-7.78077	Mycelium
1388255	-1.48423	Mycelium
1466518	-2.3469	Mycelium
1484154	-2.44818	Mycelium
1486703	-2.25256	Mycelium
1566922	-9.62619	Mycelium
1054460	-9.08539	Mycelium
1346612	-7.02495	Mycelium
1435482	-7.80408	Mycelium
1471373	-3.47061	Mycelium
1521533	-7.79209	Mycelium
1536870	-2.37443	Mycelium
1498476	-9.98933	Mycelium
1539707	-1.09566	Mycelium
1540144	-5.48534	Mycelium
1357858	-3.31551	Mycelium
1579277	-3.77258	Mycelium
1362288	-2.68828	Mycelium
1454892	-10.6608	Mycelium
1482920	-2.00947	Mycelium
1499495	-2.14271	Mycelium
1538795	-1.41988	Mycelium
1576104	-6.73837	Mycelium
1596696	-4.43911	Mycelium
1352597	-1.0509	Mycelium
1353146	-1.84155	Mycelium
1557085	-3.69938	Mycelium
1476436	-1.41575	Mycelium
1504162	-1.77533	Mycelium
1531272	-1.25546	Mycelium
1588626	-5.18715	Mycelium
1498909	-3.18245	Mycelium
1351799	-2.1726	Mycelium
1466194	-5.03577	Mycelium
1530926	-1.78751	Mycelium
1528597	-1.35848	Mycelium
1454143	-4.71023	Mycelium
1488520	-2.41267	Mycelium
1500328	-1.80997	Mycelium
1503805	-1.68664	Mycelium
1541105	-1.24393	Mycelium
1556474	-5.88294	Mycelium
1348861	-5.91257	Mycelium
1351053	-1.38859	Mycelium
1355822	-4.80263	Mycelium
1600667	-2.77563	Mycelium
1504326	-1.5898	Mycelium
1537815	-4.72223	Mycelium
1576076	-4.61014	Mycelium
1336367	-2.434	Mycelium
1380478	-1.03511	Mycelium
1453987	-4.07026	Mycelium
1478913	-3.97423	Mycelium
1460890	-2.3344	Mycelium
1468423	-1.0948	Mycelium
1477039	-1.12937	Mycelium
1535741	-6.46339	Mycelium
1600489	-1.26396	Mycelium
1481348	-2.00768	Mycelium
1519838	-5.74223	Mycelium
1327071	-2.89794	Mycelium
1340641	-2.43884	Mycelium
1370696	-7.94932	Mycelium
1385726	-2.03776	Mycelium
1474860	-2.08507	Mycelium
1494186	-1.05253	Mycelium
1513977	-2.03665	Mycelium
1529836	-2.5945	Mycelium
1586347	-5.74379	Mycelium
1470357	-2.00631	Mycelium
1501447	-1.11768	Mycelium
1596883	-1.78233	Mycelium
1377456	-5.26918	Mycelium
1508554	-7.59695	Mycelium
1386241	-6.68647	Mycelium
1445422	-1.74236	Mycelium
1601359	-3.40591	Mycelium
1465721	-3.59124	Mycelium
1344170	-1.494	Mycelium
1460379	-1.1544	Mycelium
1476275	-1.92056	Mycelium
1509730	-1.2308	Mycelium
1378545	-1.69999	Mycelium
1451960	-1.07835	Mycelium
1483241	-2.62071	Mycelium
1503008	-2.21437	Mycelium
1563161	-7.08863	Mycelium
1480596	-6.7744	Mycelium
1533364	-1.02263	Mycelium
1355022	-1.87841	Mycelium
1496835	-1.2712	Mycelium
1526513	-2.40377	Mycelium
1528290	-7.07129	Mycelium
1530213	-8.64062	Mycelium
1543245	-8.78261	Mycelium
1553343	-2.75135	Mycelium
1113608	-1.72817	Mycelium
1452614	-1.52972	Mycelium
1532543	-3.91726	Mycelium
1538481	-1.08424	Mycelium
1543702	-1.18769	Mycelium
1547980	-1.55128	Mycelium
1593519	-2.27369	Mycelium
1448092	-3.38286	Mycelium
1335238	-4.25297	Mycelium
1470338	-2.97514	Mycelium
1532248	-6.27009	Mycelium
1332728	-1.82978	Mycelium
1464477	-4.25244	Mycelium
1387547	-1.41623	Mycelium
1516804	-3.19507	Mycelium
1522164	-2.19957	Mycelium
1374875	-1.244	Mycelium
1512331	-1.63634	Mycelium
1550612	-1.86321	Mycelium
1556431	-3.76101	Mycelium
1472558	-1.35721	Mycelium
1583953	-1.03759	Mycelium
1337251	-3.78358	Mycelium
1542013	-1.12811	Mycelium
1463013	-1.56431	Mycelium
1493950	-1.49938	Mycelium
1519907	-4.22299	Mycelium
1468220	-1.88272	Mycelium
1467657	-4.21188	Mycelium
1362520	-3.43081	Mycelium
1529949	-1.58171	Mycelium
1535689	-1.02778	Mycelium
1586775	-4.7711	Mycelium
1352308	-11.1266	Mycelium
1509538	-1.25448	Mycelium
1392327	-6.16652	Mycelium
1446319	-1.41116	Mycelium
1465615	-1.21199	Mycelium
1523916	-3.02681	Mycelium
1449386	-7.83778	Mycelium
1458542	-1.28832	Mycelium
1466356	-1.35666	Mycelium
1540216	-4.11403	Mycelium
1544020	-1.63742	Mycelium
1596581	-6.30994	Mycelium
1116047	-3.13607	Mycelium
1380227	-1.40485	Mycelium
1462630	-2.02848	Mycelium
1518580	-6.28065	Mycelium
1487095	-1.16357	Mycelium
1496176	-1.76543	Mycelium
1503627	-3.51911	Mycelium
1493017	-9.37928	Mycelium
1592288	-2.68717	Mycelium
1359587	-5.38664	Mycelium
1395579	-7.32609	Mycelium
1368110	-5.77973	Mycelium
1501966	-4.90041	Mycelium
1546906	-1.20799	Mycelium
1347812	-6.91381	Mycelium
1367719	-1.57139	Mycelium
1466398	-9.72716	Mycelium
1491458	-1.23045	Mycelium
1524471	-3.38017	Mycelium
1577746	-9.67713	Mycelium
1380992	-1.3147	Mycelium
1483579	-1.42562	Mycelium
1110088	-1.15927	Mycelium
1361940	-7.4405	Mycelium
1527911	-3.75746	Mycelium
1360385	-3.35051	Mycelium
1556825	-1.83532	Mycelium
1395147	-4.73467	Mycelium
1457077	-5.5131	Mycelium
1505558	-1.5915	Mycelium
1531335	-2.34546	Mycelium
1555165	-2.8026	Mycelium
1390055	-4.26401	Mycelium
1391444	-6.80499	Mycelium
1410353	-4.55191	Mycelium
1468346	-3.3104	Mycelium
1523496	-1.22158	Mycelium
1577919	-4.54648	Mycelium
1370744	-1.33468	Mycelium
1383759	-1.94287	Mycelium
1442351	-2.33815	Mycelium
1442942	-1.67876	Mycelium
1467353	-4.40791	Mycelium
1482436	-7.71909	Mycelium
1510003	-2.85335	Mycelium
1530149	-1.20129	Mycelium
1330948	-6.77897	Mycelium
1565943	-6.91035	Mycelium
1596209	-3.98245	Mycelium
1352145	-2.7773	Mycelium
1393292	-3.85415	Mycelium
1372563	-3.77086	Mycelium
1461420	-1.45331	Mycelium
1496096	-5.71538	Mycelium
1534504	-3.22165	Mycelium
1321731	-3.49497	Mycelium
1484590	-3.17643	Mycelium
1365111	-2.5052	Mycelium
1531425	-1.93656	Mycelium
1367058	-8.38502	Mycelium
1468972	-4.00493	Mycelium
1453008	-3.00346	Mycelium
1528191	-2.13558	Mycelium
1544069	-1.32437	Mycelium
1533014	-1.59714	Mycelium
1534221	-5.89441	Mycelium
1390052	-6.48086	Mycelium
1562924	-5.10629	Mycelium
1580727	-3.75127	Mycelium
1516348	-1.22263	Mycelium
1379248	-2.03441	Mycelium
1395733	-1.99026	Mycelium
1499658	-1.65058	Mycelium
1531093	-8.11166	Mycelium
1557928	-2.34375	Mycelium
1478111	-2.39807	Mycelium
1582593	-4.6688	Mycelium
1394291	-8.55752	Mycelium
1443968	-2.84072	Mycelium
1489745	-1.14177	Mycelium
1493192	-2.32222	Mycelium
1511776	-6.61472	Mycelium
1452803	-2.13081	Mycelium
1537784	-3.87884	Mycelium
1587029	-1.51579	Mycelium
1451329	-5.67534	Mycelium
1458157	-4.02665	Mycelium
1475563	-2.101	Mycelium
1498157	-7.75459	Mycelium
1510554	-2.21995	Mycelium
1513023	-3.50725	Mycelium
1526140	-3.67989	Mycelium
1370097	-6.55317	Mycelium
1373264	-3.45957	Mycelium
1481514	-2.2839	Mycelium
1595513	-1.61117	Mycelium
1525383	-1.8635	Mycelium
1354331	-1.07729	Mycelium
1529807	-1.17659	Mycelium
1560451	-1.60782	Mycelium
1384036	-4.42937	Mycelium
1451754	-1.15508	Mycelium
1501734	-10.1037	Mycelium
1523144	-3.26132	Mycelium
1589520	-4.65096	Mycelium
1447092	-5.87291	Mycelium
1480649	-2.40962	Mycelium
1455582	-5.5116	Mycelium
1366486	-1.82271	Mycelium
1373618	-3.22804	Mycelium
1443112	-1.12974	Mycelium
1458170	-1.77347	Mycelium
1541840	-3.77602	Mycelium
1492570	-4.05473	Mycelium
1353576	-1.6407	Mycelium
1544811	-4.9939	Mycelium
1566810	-1.85344	Mycelium
1480945	-1.003	Mycelium
1482376	-2.18673	Mycelium
1547635	-1.25031	Mycelium
1572488	-4.0309	Mycelium
1090429	-1.88719	Mycelium
1493031	-1.34565	Mycelium
1499296	-5.82894	Mycelium
1596648	-2.2712	Mycelium
1601029	-3.41625	Mycelium
1394932	-2.20224	Mycelium
1395723	-1.09784	Mycelium
1555557	-6.80489	Mycelium
1355922	-2.52638	Mycelium
1380646	-10.2263	Mycelium
1597764	-1.74707	Mycelium
1381061	-1.87371	Mycelium
1461409	-1.645	Mycelium
1473523	-2.00637	Mycelium
1540644	-5.36597	Mycelium
1542596	-2.77088	Mycelium
1072150	-1.66158	Mycelium
1503858	-2.91464	Mycelium
1508685	-2.60016	Mycelium
1524571	-4.69781	Mycelium
1533566	-1.26042	Mycelium
1380467	-9.71785	Mycelium
1457561	-2.49647	Mycelium
1418025	-3.49055	Mycelium
1469352	-3.28872	Mycelium
1540181	-3.19477	Mycelium
1550284	-1.12064	Mycelium
1453076	-4.28569	Mycelium
1502548	-1.33051	Mycelium
1478305	-1.0646	Mycelium
1068969	-3.75741	Mycelium
1547057	-9.58606	Mycelium
1374450	-3.28751	Mycelium
1381926	-4.07461	Mycelium
1498674	-1.99664	Mycelium
1517499	-3.42049	Mycelium
1542972	-3.14979	Mycelium
1500625	-1.2556	Mycelium
1377870	-2.91075	Mycelium
1496831	-1.61696	Mycelium
1498084	-2.38468	Mycelium
1511196	-3.43784	Mycelium
1541943	-4.01427	Mycelium
1597150	-7.38738	Mycelium
1356221	-9.50766	Mycelium
1496324	-2.70652	Mycelium
1503257	-6.62911	Mycelium
1334481	-3.07872	Mycelium
1500271	-3.40167	Mycelium
1598711	-4.91845	Mycelium
1599598	-1.2134	Mycelium
1379347	-7.0292	Mycelium
1451075	-1.1277	Mycelium
1480198	-10.3304	Mycelium
1498841	-8.79266	Mycelium
1506074	-8.94955	Mycelium
1511524	-3.77356	Mycelium
1524740	-7.81106	Mycelium
1527817	-1.44484	Mycelium
1553563	-3.96054	Mycelium
1557821	-1.54038	Mycelium
1459652	-1.24894	Mycelium
1466945	-2.63747	Mycelium
1538711	-2.66267	Mycelium
1351863	-1.72061	Mycelium
1460702	-3.24553	Mycelium
1465504	-6.51484	Mycelium
1468263	-8.48368	Mycelium
1546790	-6.45216	Mycelium
1586879	-7.09183	Mycelium
1346466	-4.08284	Mycelium
1483268	-7.09219	Mycelium
1535616	-2.64175	Mycelium
1523754	-2.87281	Mycelium
1540039	-5.792	Mycelium
1586658	-2.29704	Mycelium
1023720	-1.323	Mycelium
1503096	-1.92254	Mycelium
1544017	-1.57676	Mycelium
1472229	-1.37846	Mycelium
1479977	-1.05857	Mycelium
1528451	-2.48232	Mycelium
1478359	-2.16064	Mycelium
1483422	-10.088	Mycelium
1494621	-7.2861	Mycelium
1533714	-4.66279	Mycelium
1558503	-5.65799	Mycelium
1577371	-4.38052	Mycelium
1599624	-8.34239	Mycelium
1473419	-7.04505	Mycelium
1494321	-4.04054	Mycelium
1478338	-1.54258	Mycelium
1482445	-1.11901	Mycelium
1365292	-6.54788	Mycelium
1540464	-6.87915	Mycelium
1574711	-7.16919	Mycelium
1476307	-12.0512	Mycelium
1477776	-5.75989	Mycelium
1377842	-1.86779	Mycelium
1546506	-1.09678	Mycelium
1347686	-6.40213	Mycelium
1557153	-7.16441	Mycelium
1592685	-1.03047	Mycelium
1137024	-4.97104	Mycelium
1465371	-1.64156	Mycelium
1482805	-3.93055	Mycelium
1467188	-1.84675	Mycelium
1478875	-1.17436	Mycelium
1487887	-1.37504	Mycelium
1488869	-2.05855	Mycelium
1356478	-2.02391	Mycelium
1518196	-2.48331	Mycelium
1584834	-4.35985	Mycelium
1599520	-1.32651	Mycelium
1061866	-4.94397	Mycelium
1525012	-4.01293	Mycelium
1499341	-3.38304	Mycelium
1500561	-6.98139	Mycelium
1515241	-2.43034	Mycelium
1500696	-2.01184	Mycelium
1516586	-8.17444	Mycelium
1096060	-1.58387	Mycelium
1495028	-3.92219	Mycelium
1508449	-4.04245	Mycelium
1485399	-3.31835	Mycelium
1591689	-2.11781	Mycelium
1323600	-5.24526	Mycelium
1348102	-1.77527	Mycelium
1386746	-1.65977	Mycelium
1447255	-2.04678	Mycelium
1471817	-2.21401	Mycelium
1524900	-4.09791	Mycelium
1559527	-3.87949	Mycelium
1372613	-1.8263	Mycelium
1478401	-10.8446	Mycelium
1492242	-3.33034	Mycelium
1493377	-1.64076	Mycelium
1549880	-2.94469	Mycelium
1560071	-5.0092	Mycelium
1346320	-1.38167	Mycelium
1349755	-11.321	Mycelium
1489851	-2.15495	Mycelium
1505679	-5.42678	Mycelium
1551296	-1.16095	Mycelium
1545960	-2.5248	Mycelium
1562935	-3.81713	Mycelium
1569195	-5.32638	Mycelium
1046273	-1.21715	Mycelium
1484053	-2.21637	Mycelium
1454618	-3.09757	Mycelium
1495103	-2.74033	Mycelium
1601498	-2.45875	Mycelium
1381561	-2.32696	Mycelium
1452029	-6.90821	Mycelium
1500095	-5.92037	Mycelium
1501971	-1.79968	Mycelium
1514329	-2.81658	Mycelium
1552867	-5.74836	Mycelium
1499551	-3.96004	Mycelium
1454587	-1.17323	Mycelium
1494030	-2.31194	Mycelium
1510693	-4.4165	Mycelium
1597489	-7.72575	Mycelium
1360612	-1.24434	Mycelium
1494799	-2.95834	Mycelium
1574310	-5.69006	Mycelium
1495268	-1.35234	Mycelium
1499749	-6.44921	Mycelium
1499904	-1.86707	Mycelium
1515851	-2.51966	Mycelium
1515886	-5.38796	Mycelium
1014017	-2.57281	Mycelium
1445047	-8.85479	Mycelium
1506194	-8.39102	Mycelium
1587567	-1.87382	Mycelium
1378072	-3.35542	Mycelium
1463888	-9.02771	Mycelium
1472724	-6.77732	Mycelium
1493756	-1.7581	Mycelium
1523825	-4.83416	Mycelium
1473780	-3.42141	Mycelium
1549742	-1.72161	Mycelium
1497641	-1.49539	Mycelium
1555727	-1.84121	Mycelium
1498232	-8.39565	Mycelium
1556854	-4.09456	Mycelium
1569021	-4.47546	Mycelium
1445386	-9.97055	Mycelium
1452110	-2.12902	Mycelium
1457599	-2.62137	Mycelium
1543114	-1.8144	Mycelium
1463601	-2.3076	Mycelium
1479128	-2.3908	Mycelium
1503560	-2.73667	Mycelium
1485516	-5.21629	Mycelium
1516815	-1.51967	Mycelium
1473442	-3.03101	Mycelium
1494123	-1.06385	Mycelium
1464428	-8.64421	Mycelium
1464670	-8.60794	Mycelium
1529446	-5.78147	Mycelium
1490323	-1.58199	Mycelium
1541969	-1.71327	Mycelium
1551079	-5.2567	Mycelium
1599094	-1.72037	Mycelium
1465157	-2.14524	Mycelium
1346179	-1.99161	Mycelium
1448763	-2.09371	Mycelium
1459902	-1.57721	Mycelium
1466834	-1.59324	Mycelium
1478382	-7.31964	Mycelium
1491777	-2.20497	Mycelium
1493298	-2.11265	Mycelium
1509476	-1.47418	Mycelium
1541014	-2.5141	Mycelium
1593471	-9.25558	Mycelium
1600718	-2.60879	Mycelium
1546327	-1.3545	Mycelium
1600731	-2.60951	Mycelium
1358498	-1.42887	Mycelium
1518991	-1.35636	Mycelium
1521094	-2.26891	Mycelium
1592493	-6.03009	Mycelium
1467132	-1.85664	Mycelium
1471900	-2.23835	Mycelium
1360559	-1.68421	Mycelium
1492926	-1.75649	Mycelium
1546527	-9.20506	Mycelium
1566724	-2.51853	Mycelium
1598769	-4.25737	Mycelium
1454622	-1.89091	Mycelium
1466795	-1.07017	Mycelium
1477803	-2.50647	Mycelium
1522539	-2.05374	Mycelium
1522906	-8.64396	Mycelium
1449798	-5.34815	Mycelium
1471342	-5.1015	Mycelium
1475425	-1.04784	Mycelium
1475956	-1.32204	Mycelium
1486091	-1.46787	Mycelium
1590996	-1.77084	Mycelium
1393913	-1.08971	Mycelium
1416449	-3.76303	Mycelium
1493772	-2.5558	Mycelium
1374885	-4.01485	Mycelium
1463115	-4.09833	Mycelium
1484004	-5.81727	Mycelium
1487973	-5.75106	Mycelium
1527200	-2.22104	Mycelium
1551698	-2.467	Mycelium
1389541	-2.21012	Mycelium
1445276	-1.62741	Mycelium
1461467	-1.12284	Mycelium
1542766	-1.5797	Mycelium
1516932	-1.06085	Mycelium
1522048	-2.7922	Mycelium
1526856	-3.59302	Mycelium
1540632	-4.03709	Mycelium
1544178	-1.39377	Mycelium
1577141	-3.5429	Mycelium
1348566	-10.3122	Mycelium
1472783	-13.5244	Mycelium
1379212	-1.72628	Mycelium
1472060	-4.57706	Mycelium
1388014	-2.05341	Mycelium
1443303	-7.64822	Mycelium
1522630	-3.29689	Mycelium
1370469	-4.05926	Mycelium
1437947	-4.30926	Mycelium
1468968	-3.78846	Mycelium
1548348	-4.2251	Mycelium
1367679	-2.00042	Mycelium
1473371	-1.9914	Mycelium
1478086	-2.92064	Mycelium
1386412	-2.39917	Mycelium
1359997	-4.22986	Mycelium
1486960	-1.30124	Mycelium
1510155	-3.67608	Mycelium
1510270	-3.22858	Mycelium
1573297	-3.06456	Mycelium
1520282	-4.24162	Mycelium
1352604	-1.87265	Mycelium
1383614	-1.66693	Mycelium
1517699	-5.31309	Mycelium
1119585	-1.52386	Mycelium
1548726	-1.16177	Mycelium
1552665	-2.77294	Mycelium
1347007	-2.06439	Mycelium
1355782	-1.24027	Mycelium
1575061	-2.03745	Mycelium
1341254	-8.14837	Mycelium
1360356	-6.69189	Mycelium
1443103	-1.98173	Mycelium
1396264	-1.4061	Mycelium
1567917	-1.97408	Mycelium
1443749	-1.79516	Mycelium
1530191	-1.16044	Mycelium
1578714	-4.99358	Mycelium
1032352	-2.79574	Mycelium
1361253	-1.23437	Mycelium
1372713	-1.74594	Mycelium
1375680	-4.50198	Mycelium
1377814	-1.40118	Mycelium
1438416	-2.07424	Mycelium
1493569	-1.28291	Mycelium
1526167	-3.81822	Mycelium
1543351	-2.01232	Mycelium
1539882	-1.29979	Mycelium
1028052	-2.04062	Mycelium
1377346	-6.10528	Mycelium
1407819	-1.64262	Mycelium
1471814	-3.5489	Mycelium
1474686	-2.85497	Mycelium
1508089	-3.38443	Mycelium
1531613	-1.62692	Mycelium
1534857	-1.29805	Mycelium
1589921	-4.35602	Mycelium
1591077	-2.01401	Mycelium
1600498	-9.44039	Mycelium
1377605	-2.0968	Mycelium
1377712	-2.80806	Mycelium
1395834	-2.75347	Mycelium
1454962	-1.34233	Mycelium
1517048	-5.39911	Mycelium
1532048	-2.79363	Mycelium
1553990	-9.29761	Mycelium
1574383	-2.41678	Mycelium
1348539	-3.95555	Mycelium
1379047	-1.80172	Mycelium
1499760	-4.10966	Mycelium
1507599	-5.30655	Mycelium
1548709	-2.58136	Mycelium
1376283	-1.00184	Mycelium
1467380	-2.64089	Mycelium
1494575	-1.23863	Mycelium
1463710	-6.01698	Mycelium
1453071	-3.84975	Mycelium
1453499	-9.93701	Mycelium
1474423	-6.39532	Mycelium
1499148	-4.95152	Mycelium
1486358	-4.32734	Mycelium
1536371	-4.67461	Mycelium
1548209	-1.15086	Mycelium
1472698	-2.65596	Mycelium
1573078	-1.35485	Mycelium
1354895	-2.10762	Mycelium
1482125	-2.3952	Mycelium
1508444	-4.52039	Mycelium
1511844	-1.20388	Mycelium
1512207	-8.44756	Mycelium
1542392	-3.7402	Mycelium
1574081	-8.14365	Mycelium
1358887	-1.10578	Mycelium
1371530	-1.20178	Mycelium
1453374	-3.92081	Mycelium
1595137	-3.16959	Mycelium
1578119	-4.07185	Mycelium
1490863	-3.44898	Mycelium
1507471	-5.2652	Mycelium
1521190	-4.90888	Mycelium
1523822	-5.47882	Mycelium
1547271	-5.50879	Mycelium
1523320	-1.69904	Mycelium
1548494	-8.95795	Mycelium
1552830	-11.6664	Mycelium
1596437	-2.27062	Mycelium
1448161	-2.6124	Mycelium
1477967	-1.26594	Mycelium
1523307	-3.85097	Mycelium
1566063	-3.45385	Mycelium
1557673	-3.51788	Mycelium
1038382	-6.94276	Mycelium
1102636	-3.4172	Mycelium
1456576	-3.03126	Mycelium
1486844	-7.16609	Mycelium
1544162	-2.70202	Mycelium
1580222	-3.22906	Mycelium
[truncated: 1,923 more rows]
