# Supplementary material for: Coordinated Gene Family Evolution Shapes the Genome of Dimorphic Organisms
Source: Research Square preprint supplement (doi:10.21203/rs.3.rs-6393820/v1), 2025-04-08
Supplement: Supplementary file 9 [file f2be26c1e9c34bd06c2b6290.xlsx]

## Sheet: genes_h2h_All
Cluster	ID	Neighbor Gene	Expression	Morfology
Cluster 22	1376907	1475750	-7.124256635	Mycelium
Cluster 23	1053451	1483265	0.0	Not_differential
Cluster 33	1590178	1391899	1.785981747	Yeast
Cluster 38	1555938	1555947	1.124563843	Yeast
Cluster 39	1531745	1138061	3.393897485	Yeast
Cluster 56	1528637	1528630	-2.519908368	Mycelium
Cluster 59	1600607	1545099	5.827727004	Yeast
Cluster 66	1371485	1453209	-1.586610839	Mycelium
Cluster 71	1595950	1494709	-2.290909629	Mycelium
Cluster 73	1587041	1504044	-3.688455054	Mycelium
Cluster 80	1533294	1533305	-4.154892061	Mycelium
Cluster 82	1553236	1553234	-1.032607515	Mycelium
Cluster 84	1335829	1448945	-5.683698148	Mycelium
Cluster 91	1358675	1384036	0.0	Not_differential
Cluster 106	1448945	1335829	-2.689773987	Mycelium
Cluster 107	1524645	1336486	2.318001585	Yeast
Cluster 109	1458659	1458664	1.325497224	Yeast
Cluster 149	1537139	1342711	0.0	Not_differential
Cluster 155	1338733	1566792	0.0	Not_differential
Cluster 166	1592588	1458539	0.0	Not_differential
Cluster 172	1513820	1513814	-1.466232792	Mycelium
Cluster 174	1601665	1556564	-1.027774352	Mycelium
Cluster 180	1516978	1516976	1.411466479	Yeast
Cluster 181	1494442	1494438	0.0	Not_differential
Cluster 183	1519360	1588502	-4.258175342	Mycelium
Cluster 187	1347933	1459735	0.0	Not_differential
Cluster 190	1566660	1535560	1.028493546	Yeast
Cluster 193	1502638	1596696	2.47697067	Yeast
Cluster 196	1500572	1083862	0.0	Not_differential
Cluster 198	1488753	1585572	-3.527214428	Mycelium
Cluster 200	1463100	1463096	0.0	Not_differential
Cluster 200	1601407	1553092	0.0	Not_differential
Cluster 201	1536516	1536522	2.489117241	Yeast
Cluster 205	1518590	1518596	2.312794605	Yeast
Cluster 208	1559304	1570160	0.0	Not_differential
Cluster 210	1491632	1491636	0.0	Not_differential
Cluster 212	1501215	1586768	3.190976575	Yeast
Cluster 213	1600907	1548061	-1.136790469	Mycelium
Cluster 217	1600894	1547900	1.098064679	Yeast
Cluster 218	1438082	1522867	-2.002793944	Mycelium
Cluster 229	1595018	1484739	-1.51640529	Mycelium
Cluster 233	1510080	1510087	2.947222289	Yeast
Cluster 251	1177367	1177383	0.0	Not_differential
Cluster 253	1472681	1472690	-2.129439718	Mycelium
Cluster 265	1550122	1550121	-1.336361953	Mycelium
Cluster 268	1532090	1532085	0.0	Not_differential
Cluster 270	1530130	1530136	-1.720731269	Mycelium
Cluster 277	1411357	1492230	1.348436084	Yeast
Cluster 283	1527578	1527577	0.0	Not_differential
Cluster 286	1442612	1457591	-2.71409006	Mycelium
Cluster 286	1457033	1347260	-4.545287152	Mycelium
Cluster 288	1591188	1451930	0.0	Not_differential
Cluster 289	1522867	1438082	0.0	Not_differential
Cluster 297	1537683	1599902	0.0	Not_differential
Cluster 300	1467693	1467697	-5.617861216	Mycelium
Cluster 301	1351177	1474119	-1.453475735	Mycelium
Cluster 305	1381758	1495676	-4.454357838	Mycelium
Cluster 307	1533178	1533184	-1.612787231	Mycelium
Cluster 308	1351906	1477271	0.0	Not_differential
Cluster 310	1528036	1528032	-6.440088522	Mycelium
Cluster 311	1340513	1527813	1.097237221	Yeast
Cluster 313	1588338	1387164	1.320565628	Yeast
Cluster 314	1473020	1444198	-1.416587227	Mycelium
Cluster 319	1379339	1485669	-1.240484521	Mycelium
Cluster 320	1446798	1498542	0.0	Not_differential
Cluster 327	1563956	1508067	-1.780911097	Mycelium
Cluster 328	1537999	1391973	-3.351132639	Mycelium
Cluster 332	1470821	1571204	0.0	Not_differential
Cluster 336	1585975	1492697	-3.93239327	Mycelium
Cluster 339	1458093	1458100	1.061416534	Yeast
Cluster 343	1562057	1489493	-2.140196184	Mycelium
Cluster 343	1595590	1355208	0.0	Not_differential
Cluster 347	1484963	1484966	-1.922006986	Mycelium
Cluster 347	1499263	1499260	-4.776970093	Mycelium
Cluster 348	1491684	1491681	0.0	Not_differential
Cluster 357	1466422	1466411	-1.298944029	Mycelium
Cluster 360	1497021	1497033	-2.007969924	Mycelium
Cluster 365	1358409	1503848	1.881086231	Yeast
Cluster 367	1148437	1537364	0.0	Not_differential
Cluster 368	1463123	1463117	0.0	Not_differential
Cluster 368	1586778	1501310	0.0	Not_differential
Cluster 370	1549038	1549036	0.0	Not_differential
Cluster 372	1566709	1391507	-1.536163325	Mycelium
Cluster 374	1516043	1516049	-1.626606204	Mycelium
Cluster 377	1483665	1594914	-2.345599313	Mycelium
Cluster 378	1379894	1062574	0.0	Not_differential
Cluster 391	1528597	1528612	-1.358483242	Mycelium
Cluster 395	1487062	1487070	0.0	Not_differential
Cluster 397	1452990	1452985	0.0	Not_differential
Cluster 401	1465721	1374655	-3.59123707	Mycelium
Cluster 402	1451960	1369306	-1.078347938	Mycelium
Cluster 409	1471126	1471125	0.0	Not_differential
Cluster 412	1467657	1593413	-4.211880076	Mycelium
Cluster 415	1466356	1466364	-1.356662317	Mycelium
Cluster 425	1443910	1470086	-4.375594709	Mycelium
Cluster 430	1395733	1552616	-1.990259414	Mycelium
Cluster 432	1495827	1495824	0.0	Not_differential
Cluster 434	1484818	1484816	4.010414471	Yeast
Cluster 436	1354331	1354329	-1.077285101	Mycelium
Cluster 445	1442810	1459510	2.296096595	Yeast
Cluster 451	1349753	1467507	0.0	Not_differential
Cluster 453	1512612	1512609	1.066842637	Yeast
Cluster 463	1087891	1503086	1.75153748	Yeast
Cluster 471	1485399	1379270	-3.318351866	Mycelium
Cluster 479	1437718	1519706	2.956700469	Yeast
Cluster 485	1513579	1513577	1.659726645	Yeast
Cluster 487	1317116	1531272	1.245442448	Yeast
Cluster 491	1465157	1465166	-2.145241686	Mycelium
Cluster 492	1599794	1536395	2.867272305	Yeast
Cluster 496	1452154	1550141	0.0	Not_differential
Cluster 501	1496003	1495999	2.611193526	Yeast
Cluster 504	1565554	1124728	-1.069055861	Mycelium
Cluster 516	1352752	1378127	-1.62999772	Mycelium
Cluster 519	1522510	1449310	1.388440574	Yeast
Cluster 520	1589603	1531416	0.0	Not_differential
Cluster 526	1475462	1475458	0.0	Not_differential
Cluster 530	1557673	1032352	-3.517876819	Mycelium
Cluster 531	1547900	1600894	0.0	Not_differential
Cluster 537	1501740	1501738	-1.290250426	Mycelium
Cluster 548	1453734	1453733	1.867399991	Yeast
Cluster 550	1513298	1360745	2.98115615	Yeast
Cluster 575	1511388	1511393	1.106506638	Yeast
Cluster 575	1595112	1485755	0.0	Not_differential
Cluster 580	1546568	1546569	0.0	Not_differential
Cluster 582	1456382	1456394	-2.559596546	Mycelium
Cluster 585	1487212	1487205	0.0	Not_differential
Cluster 593	1455688	1293609	0.0	Not_differential
Cluster 595	1533721	1533727	-3.009955227	Mycelium
Cluster 597	1452919	1452915	-1.054741124	Mycelium
Cluster 598	1442722	1010138	-9.063006878	Mycelium
Cluster 598	1484192	1484195	-4.407893012	Mycelium
Cluster 600	1474373	1474371	1.038959325	Yeast
Cluster 604	1335537	1388477	0.0	Not_differential
Cluster 607	1463208	1583212	4.990994189	Yeast
Cluster 612	1535490	1535487	2.053455703	Yeast
Cluster 615	1468637	1468639	-1.257107821	Mycelium
Cluster 619	1568089	1601029	-4.038901623	Mycelium
Cluster 621	1481140	1410203	0.0	Not_differential
Cluster 621	1555294	1555288	0.0	Not_differential
Cluster 625	1473376	1473374	-3.364887755	Mycelium
Cluster 628	1599634	1534694	0.0	Not_differential
Cluster 633	1476152	1476147	-4.233837596	Mycelium
Cluster 636	1533305	1533294	-5.163713519	Mycelium
Cluster 637	1550490	1550481	-2.408496772	Mycelium
Cluster 639	1497461	1497458	1.334851443	Yeast
Cluster 640	1540112	1392525	0.0	Not_differential
Cluster 642	1375552	1469038	1.570720109	Yeast
Cluster 644	1542151	1542150	-3.378988786	Mycelium
Cluster 645	1465948	1465946	-1.419684796	Mycelium
Cluster 648	1489201	1489205	0.0	Not_differential
Cluster 654	1463199	1463197	-1.369547016	Mycelium
Cluster 655	1533665	1533663	1.50340873	Yeast
Cluster 656	1597086	1506917	2.77064392	Yeast
Cluster 657	1460102	1460103	-1.400419823	Mycelium
Cluster 661	1487205	1487212	0.0	Not_differential
Cluster 668	1460598	1460595	0.0	Not_differential
Cluster 678	1503848	1358409	-2.857010544	Mycelium
Cluster 687	1495999	1496003	-3.637877974	Mycelium
Cluster 694	1545529	1545524	-1.21353821	Mycelium
Cluster 695	1526665	1526668	-1.582926424	Mycelium
Cluster 696	1529855	1529853	4.006387936	Yeast
Cluster 697	1596676	1502444	1.508075997	Yeast
Cluster 701	1544678	1544675	-2.209131798	Mycelium
Cluster 708	1505659	1505672	1.152501387	Yeast
Cluster 710	1548735	1394734	-4.187250854	Mycelium
Cluster 719	1599361	1531697	0.0	Not_differential
Cluster 730	1490934	1490932	-1.129507586	Mycelium
Cluster 741	1463941	1463950	-1.42284511	Mycelium
Cluster 743	1499609	1412116	1.444767876	Yeast
Cluster 750	1456624	1456622	6.40249308	Yeast
Cluster 752	1417078	1547635	1.643331991	Yeast
Cluster 755	1503343	1503338	2.578343602	Yeast
Cluster 759	1473157	1473161	-2.394906543	Mycelium
Cluster 762	1595084	1485491	-1.664504545	Mycelium
Cluster 764	1169398	1452060	-1.698998641	Mycelium
Cluster 768	1513001	1512999	-2.814313864	Mycelium
Cluster 769	1511344	1511347	-4.510406146	Mycelium
Cluster 772	1455020	1455023	0.0	Not_differential
Cluster 774	1454269	1454265	0.0	Not_differential
Cluster 775	1378127	1352752	-1.213914196	Mycelium
Cluster 778	1453479	1453476	1.850410534	Yeast
Cluster 779	1553319	1553313	-1.607954614	Mycelium
Cluster 781	1526810	1598942	0.0	Not_differential
Cluster 797	1468639	1468637	1.256451485	Yeast
Cluster 803	1557758	1396706	0.0	Not_differential
Cluster 804	1553884	1177218	1.438149387	Yeast
Cluster 810	1598065	1588304	1.459920287	Yeast
Cluster 819	1594929	1445276	-2.307332694	Mycelium
Cluster 823	1536851	1536862	2.24619488	Yeast
Cluster 823	1561552	1484487	0.0	Not_differential
Cluster 826	1548700	1548709	-3.346026686	Mycelium
Cluster 836	1514283	1514282	-4.364921457	Mycelium
Cluster 840	1563170	1357544	0.0	Not_differential
Cluster 846	1177383	1177367	0.0	Not_differential
Cluster 851	1546156	1546146	0.0	Not_differential
Cluster 852	1559426	1463802	0.0	Not_differential
Cluster 854	1467549	1467556	2.560608209	Yeast
Cluster 856	1514503	1514522	-1.267003671	Mycelium
Cluster 866	1459735	1347933	0.0	Not_differential
Cluster 869	1532715	1340256	0.0	Not_differential
Cluster 876	1383197	1596584	0.0	Not_differential
Cluster 877	1508020	1508018	-8.131062992	Mycelium
Cluster 884	1487911	1487915	0.0	Not_differential
Cluster 888	1496083	1356478	0.0	Not_differential
Cluster 893	1554216	1396098	-1.176350222	Mycelium
Cluster 898	1539833	1539826	1.555244489	Yeast
Cluster 899	1565843	1526841	1.138643332	Yeast
Cluster 900	1478591	1478594	-1.130064827	Mycelium
Cluster 902	1523817	1523822	-1.967231183	Mycelium
Cluster 906	1497788	1356893	-1.227863065	Mycelium
Cluster 911	1431505	1349700	0.0	Not_differential
Cluster 913	1454265	1454269	-1.210447528	Mycelium
Cluster 924	1542057	1542059	-2.135207127	Mycelium
Cluster 925	1461633	1461638	-2.804827056	Mycelium
Cluster 930	1522421	1522411	1.63114245	Yeast
Cluster 935	1500658	1586714	-8.539268217	Mycelium
Cluster 935	1580386	1393955	-4.231395203	Mycelium
Cluster 935	1580449	1590992	0.0	Not_differential
Cluster 937	1481470	1584910	2.480568278	Yeast
Cluster 939	1490198	1490200	0.0	Not_differential
Cluster 940	1503924	1587029	1.514527902	Yeast
Cluster 945	1545819	1545821	-3.499747117	Mycelium
Cluster 948	1447416	1504426	0.0	Not_differential
Cluster 949	1582818	1458911	-4.558209844	Mycelium
Cluster 957	1538751	1342573	1.121107141	Yeast
Cluster 961	1541958	1440258	-1.801046495	Mycelium
Cluster 969	1356177	1494830	0.0	Not_differential
Cluster 977	1549285	1549279	0.0	Not_differential
Cluster 992	1526668	1526665	1.567874876	Yeast
Cluster 994	1471210	1471209	0.0	Not_differential
Cluster 997	1551809	1551807	1.979088482	Yeast
Cluster 1000	1363150	1449377	0.0	Not_differential
Cluster 1003	1520295	1118177	0.0	Not_differential
Cluster 1012	1356314	1495435	-1.797083472	Mycelium
Cluster 1013	1374151	1463314	-7.899679134	Mycelium
Cluster 1015	1548982	1548977	1.075252865	Yeast
Cluster 1019	1585128	1483887	-2.21057389	Mycelium
Cluster 1025	1541314	1541311	4.775649604	Yeast
Cluster 1027	1567818	1546834	1.476362936	Yeast
Cluster 1034	1483184	1483176	2.753250544	Yeast
Cluster 1047	1384457	1506711	-1.809075842	Mycelium
Cluster 1047	1490871	1380598	-1.287591944	Mycelium
Cluster 1049	1478761	1478759	0.0	Not_differential
Cluster 1052	1361616	1516854	-7.402199613	Mycelium
Cluster 1056	1391698	1366356	-1.196185422	Mycelium
Cluster 1066	1463786	1463790	0.0	Not_differential
Cluster 1074	1495317	1495322	0.0	Not_differential
Cluster 1080	1594582	1480198	-9.034354704	Mycelium
Cluster 1089	1368998	1591101	1.455550284	Yeast
Cluster 1095	1504426	1447416	-3.737100594	Mycelium
Cluster 1097	1510047	1510043	1.132119703	Yeast
Cluster 1100	1504225	1504232	0.0	Not_differential
Cluster 1102	1530268	1599241	-1.890966404	Mycelium
Cluster 1107	1523794	1523798	1.636151884	Yeast
Cluster 1110	1550913	1369921	-2.30638958	Mycelium
Cluster 1112	1597234	1508544	0.0	Not_differential
Cluster 1113	1483265	1053451	4.197349631	Yeast
Cluster 1113	1526937	1526943	0.0	Not_differential
Cluster 1125	1485531	1485518	1.604396667	Yeast
Cluster 1130	1532744	1390728	0.0	Not_differential
Cluster 1131	1596915	1505068	-2.053337483	Mycelium
Cluster 1140	1557105	1557103	6.148575559	Yeast
Cluster 1141	1471150	1471155	0.0	Not_differential
Cluster 1143	1601272	1370120	2.093752818	Yeast
Cluster 1148	1416742	1544569	-1.176807686	Mycelium
Cluster 1151	1354959	1354963	-3.800770382	Mycelium
Cluster 1157	1543334	1543329	-2.540427184	Mycelium
Cluster 1162	1511848	1564354	-3.576929718	Mycelium
Cluster 1167	1363706	1525379	4.172058069	Yeast
Cluster 1169	1484346	1484351	1.119144497	Yeast
Cluster 1179	1551951	1395537	-1.119269022	Mycelium
Cluster 1181	1503128	1503136	-3.858793395	Mycelium
Cluster 1188	1593413	1467657	-3.756427921	Mycelium
Cluster 1189	1355369	1491458	-3.081401361	Mycelium
Cluster 1192	1366981	1392327	2.973855209	Yeast
Cluster 1197	1541522	1541540	1.049449219	Yeast
Cluster 1199	1541908	1541914	0.0	Not_differential
Cluster 1216	1324484	1474249	-1.768973177	Mycelium
Cluster 1229	1454648	1346466	1.178850544	Yeast
Cluster 1235	1515076	1597839	-5.838316681	Mycelium
Cluster 1240	1596584	1383197	0.0	Not_differential
Cluster 1243	1536423	1536417	1.713482564	Yeast
Cluster 1247	1484159	1433487	0.0	Not_differential
Cluster 1252	1509609	1509587	0.0	Not_differential
Cluster 1253	1445917	1490047	3.430402879	Yeast
Cluster 1258	1548221	1394564	-1.62220885	Mycelium
Cluster 1265	1568082	1344511	-3.639825983	Mycelium
Cluster 1269	1499754	1499760	1.052973721	Yeast
Cluster 1274	1506917	1597086	1.583219832	Yeast
Cluster 1285	1479497	1479494	-1.117266459	Mycelium
Cluster 1291	1540682	1540674	1.452155017	Yeast
Cluster 1294	1518232	1518226	-1.592684696	Mycelium
Cluster 1297	1539098	1151236	2.448795304	Yeast
Cluster 1301	1526714	1364035	0.0	Not_differential
Cluster 1302	1490200	1490198	0.0	Not_differential
Cluster 1305	1542202	1542215	0.0	Not_differential
Cluster 1308	1370067	1395404	0.0	Not_differential
Cluster 1309	1503086	1087891	0.0	Not_differential
Cluster 1323	1524941	1524946	-4.567530512	Mycelium
Cluster 1325	1366719	1538442	-1.375463239	Mycelium
Cluster 1333	1477485	1477490	1.842929925	Yeast
Cluster 1337	1508379	1359524	-3.644737065	Mycelium
Cluster 1349	1584910	1481470	0.0	Not_differential
Cluster 1353	1600961	1451974	-1.000795437	Mycelium
Cluster 1355	1384248	1358887	-3.746817017	Mycelium
Cluster 1360	1563907	1507599	1.532412045	Yeast
Cluster 1373	1352156	1478363	2.112997405	Yeast
Cluster 1380	1541841	1541840	0.0	Not_differential
Cluster 1386	1510816	1510814	-1.170246023	Mycelium
Cluster 1389	1469221	1469227	-1.625954536	Mycelium
Cluster 1393	1544304	1544309	-1.266059525	Mycelium
Cluster 1402	1592410	1372550	1.265383878	Yeast
Cluster 1407	1451930	1591188	1.303298429	Yeast
Cluster 1409	1498689	1498674	-3.233585755	Mycelium
Cluster 1410	1339530	1529761	0.0	Not_differential
Cluster 1427	1600323	1542132	0.0	Not_differential
Cluster 1431	1538065	1538061	1.076224971	Yeast
Cluster 1432	1360745	1513298	0.0	Not_differential
Cluster 1434	1525910	1525911	0.0	Not_differential
Cluster 1437	1504232	1504225	0.0	Not_differential
Cluster 1441	1391899	1590178	-8.950858573	Mycelium
Cluster 1448	1527318	1598989	0.0	Not_differential
Cluster 1451	1555734	1555746	-3.15870773	Mycelium
Cluster 1461	1464356	1464352	1.166967371	Yeast
Cluster 1467	1443996	1470940	0.0	Not_differential
Cluster 1467	1516150	1516145	-1.877816215	Mycelium
Cluster 1469	1516145	1516150	-7.677500297	Mycelium
Cluster 1474	1549544	1601055	-3.018258945	Mycelium
Cluster 1480	1514924	1448500	-6.790583021	Mycelium
Cluster 1482	1550141	1452154	-1.547110955	Mycelium
Cluster 1487	1442540	1456983	2.317440372	Yeast
Cluster 1497	1496411	1446595	0.0	Not_differential
Cluster 1502	1544770	1544759	2.68759971	Yeast
Cluster 1505	1544182	1544178	3.894838947	Yeast
Cluster 1506	1463599	1463601	-7.744266005	Mycelium
Cluster 1509	1467407	1467419	-1.127133243	Mycelium
Cluster 1519	1452120	1549906	1.248848912	Yeast
Cluster 1520	1464200	1464209	3.319971946	Yeast
Cluster 1525	1483491	1483487	-3.719611093	Mycelium
Cluster 1530	1503944	1503936	0.0	Not_differential
Cluster 1530	1503944	1435844	0.0	Not_differential
Cluster 1531	1529057	1529059	1.109082255	Yeast
Cluster 1534	1496782	1411847	0.0	Not_differential
Cluster 1535	1528369	1528366	-1.039225597	Mycelium
Cluster 1544	1595824	1493509	0.0	Not_differential
Cluster 1545	1471209	1471210	0.0	Not_differential
Cluster 1546	1478342	1478347	-1.422380372	Mycelium
Cluster 1549	1495322	1495317	1.02542625	Yeast
Cluster 1557	1550481	1550490	0.0	Not_differential
Cluster 1562	1453654	1453651	7.578080906	Yeast
Cluster 1562	1541639	1541652	0.0	Not_differential
Cluster 1566	1536417	1536423	2.900757023	Yeast
Cluster 1578	1481294	1481298	-1.259735139	Mycelium
Cluster 1580	1544675	1544678	-3.864038524	Mycelium
Cluster 1587	1517680	1517688	3.832039812	Yeast
Cluster 1590	1367862	1542840	-2.944802145	Mycelium
Cluster 1594	1583336	1019783	-1.059304527	Mycelium
Cluster 1599	1415883	1536235	-1.680489966	Mycelium
Cluster 1602	1536522	1536516	1.612309243	Yeast
Cluster 1613	1589336	1364399	-6.421706351	Mycelium
Cluster 1615	1365138	1531626	-1.350669505	Mycelium
Cluster 1617	1526571	1526573	0.0	Not_differential
Cluster 1619	1359273	1095462	-1.010292505	Mycelium
Cluster 1621	1478594	1478591	0.0	Not_differential
Cluster 1627	1473161	1473157	-2.505912889	Mycelium
Cluster 1632	1383244	1383246	-9.440578839	Mycelium
Cluster 1634	1469642	1469656	1.095376546	Yeast
Cluster 1634	1469656	1469642	-8.846226568	Mycelium
Cluster 1642	1504306	1504297	-4.730710484	Mycelium
Cluster 1643	1516079	1564778	-5.180184679	Mycelium
Cluster 1659	1489601	1489610	2.051866218	Yeast
Cluster 1667	1467688	1467686	-3.413012774	Mycelium
Cluster 1667	1519706	1437718	0.0	Not_differential
Cluster 1673	1517144	1517149	2.618550447	Yeast
Cluster 1675	1595581	1490705	-1.769963353	Mycelium
Cluster 1680	1598271	1519577	-1.779509347	Mycelium
Cluster 1683	1537817	1537822	-3.312543485	Mycelium
Cluster 1686	1555288	1555294	-1.541015429	Mycelium
Cluster 1688	1540851	1540848	0.0	Not_differential
Cluster 1688	1541450	1541460	0.0	Not_differential
Cluster 1688	1570595	1466150	-2.229176672	Mycelium
Cluster 1692	1491578	1491583	-2.916502581	Mycelium
Cluster 1707	1360586	1512522	0.0	Not_differential
Cluster 1721	1113119	1598085	1.08628757	Yeast
Cluster 1723	1358663	1504804	-1.664132842	Mycelium
Cluster 1731	1538864	1538869	-2.484350051	Mycelium
Cluster 1736	1585445	1585446	0.0	Not_differential
Cluster 1739	1512218	1448239	-4.116718308	Mycelium
Cluster 1740	1513577	1513579	3.823647345	Yeast
Cluster 1742	1502584	1596687	-5.873751756	Mycelium
Cluster 1743	1600237	1541162	-3.011641672	Mycelium
Cluster 1745	1495578	1495588	0.0	Not_differential
Cluster 1755	1535307	1535314	0.0	Not_differential
Cluster 1755	1553313	1553319	0.0	Not_differential
Cluster 1758	1535006	1365920	0.0	Not_differential
Cluster 1765	1522612	1388382	0.0	Not_differential
Cluster 1775	1440258	1541958	0.0	Not_differential
Cluster 1777	1549305	1549303	-2.631039849	Mycelium
Cluster 1787	1384361	1506249	-2.181922163	Mycelium
Cluster 1792	1479505	1572402	1.200659012	Yeast
Cluster 1800	1322923	1443421	-1.418507444	Mycelium
Cluster 1803	1483805	1483811	1.208548149	Yeast
Cluster 1804	1524946	1524941	0.0	Not_differential
Cluster 1806	1320650	1457407	1.176081713	Yeast
Cluster 1811	1542350	1542357	-2.227414434	Mycelium
Cluster 1817	1365027	1531200	-4.115085416	Mycelium
Cluster 1829	1519850	1519847	1.242874837	Yeast
Cluster 1831	1534694	1599634	1.247193805	Yeast
Cluster 1838	1542132	1600323	0.0	Not_differential
Cluster 1854	1464414	1570377	-1.116522854	Mycelium
Cluster 1854	1464414	1431171	-1.116522854	Mycelium
Cluster 1861	1455558	1455546	5.123073651	Yeast
Cluster 1863	1518325	1361981	-1.720996135	Mycelium
Cluster 1869	1383246	1383244	-5.381865707	Mycelium
Cluster 1875	1391253	1534957	-1.452818113	Mycelium
Cluster 1881	1340256	1532715	-2.414003926	Mycelium
Cluster 1888	1529761	1339530	0.0	Not_differential
Cluster 1902	1511602	1385726	2.565966173	Yeast
Cluster 1908	1483768	1483776	3.387032755	Yeast
Cluster 1909	1446491	1381695	-1.049438895	Mycelium
Cluster 1937	1443812	1469197	-2.121932712	Mycelium
Cluster 1938	1459280	1459285	-2.385950743	Mycelium
Cluster 1945	1488735	1488731	0.0	Not_differential
Cluster 1947	1378100	1480659	-3.12678646	Mycelium
Cluster 1953	1370951	1555165	-4.680817504	Mycelium
Cluster 1956	1509587	1509609	-2.202311849	Mycelium
Cluster 1964	1346017	1568882	0.0	Not_differential
Cluster 1965	1376997	1476168	0.0	Not_differential
Cluster 1967	1446740	1497996	3.924239351	Yeast
Cluster 1969	1583212	1463208	-4.01420401	Mycelium
Cluster 1971	1469359	1469352	-1.635756758	Mycelium
Cluster 1972	1499283	1499290	2.353684788	Yeast
Cluster 1983	1553234	1553236	-1.411715526	Mycelium
Cluster 1987	1512912	1448306	1.712671754	Yeast
Cluster 1988	1543329	1543334	2.520005479	Yeast
Cluster 1989	1566189	1530582	0.0	Not_differential
Cluster 1995	1537822	1537817	-3.992079885	Mycelium
Cluster 2002	1463197	1463199	0.0	Not_differential
Cluster 2004	1468184	1468191	-10.90979678	Mycelium
Cluster 2005	1349083	1374450	-3.090747036	Mycelium
Cluster 2008	1583067	1461449	0.0	Not_differential
Cluster 2009	1532530	1578714	0.0	Not_differential
Cluster 2010	1540617	1540612	0.0	Not_differential
Cluster 2019	1541311	1541314	1.971209964	Yeast
Cluster 2021	1564503	1448348	-1.609427156	Mycelium
Cluster 2027	1535140	1535117	2.800057859	Yeast
Cluster 2040	1527441	1449839	-1.232629679	Mycelium
Cluster 2042	1385707	1511570	0.0	Not_differential
Cluster 2047	1512522	1360586	-1.861002771	Mycelium
Cluster 2048	1519092	1448965	2.513500446	Yeast
Cluster 2054	1526128	1526139	0.0	Not_differential
Cluster 2057	1472659	1036243	-1.994921086	Mycelium
Cluster 2061	1496529	1586347	-1.562727624	Mycelium
Cluster 2061	1597513	1511360	0.0	Not_differential
Cluster 2064	1483595	1483593	0.0	Not_differential
Cluster 2065	1552560	1552564	0.0	Not_differential
Cluster 2068	1368942	1547091	0.0	Not_differential
Cluster 2072	1492917	1595779	0.0	Not_differential
Cluster 2074	1528032	1528036	-1.894639319	Mycelium
Cluster 2083	1460757	1013639	-6.912494639	Mycelium
Cluster 2088	1587640	1510394	-2.106190529	Mycelium
Cluster 2089	1591101	1368998	0.0	Not_differential
Cluster 2090	1599753	1535961	1.926379878	Yeast
Cluster 2099	1484321	1378995	3.303763694	Yeast
Cluster 2103	1381853	1496113	0.0	Not_differential
Cluster 2107	1548630	1548640	1.259439291	Yeast
Cluster 2113	1514408	1514411	-1.081584411	Mycelium
Cluster 2117	1376427	1351053	0.0	Not_differential
Cluster 2122	1361624	1516925	0.0	Not_differential
Cluster 2125	1520585	1520573	0.0	Not_differential
Cluster 2127	1389450	1389448	-1.169077445	Mycelium
Cluster 2135	1459611	1373264	3.130685527	Yeast
Cluster 2144	1468674	1570897	3.758348947	Yeast
Cluster 2147	1498542	1446798	-1.360159981	Mycelium
Cluster 2150	1539293	1539299	-1.056291471	Mycelium
Cluster 2154	1535487	1535490	0.0	Not_differential
Cluster 2158	1451668	1545916	1.095593759	Yeast
Cluster 2160	1470274	1470272	0.0	Not_differential
Cluster 2161	1496098	1496105	0.0	Not_differential
Cluster 2162	1525833	1525837	1.681570818	Yeast
Cluster 2166	1483414	1483422	-2.103173939	Mycelium
Cluster 2168	1520506	1598368	0.0	Not_differential
Cluster 2172	1489129	1489134	1.722260577	Yeast
Cluster 2181	1473055	1350925	3.18978843	Yeast
Cluster 2183	1361204	1588095	-9.34306411	Mycelium
Cluster 2187	1485518	1485531	2.473649056	Yeast
Cluster 2187	1590251	1538481	0.0	Not_differential
Cluster 2187	1599978	1150217	-1.611797073	Mycelium
Cluster 2193	1559317	1016555	-8.087652899	Mycelium
Cluster 2201	1354749	1380115	1.270384857	Yeast
Cluster 2202	1360061	1510462	-3.491790115	Mycelium
Cluster 2207	1036243	1472659	0.0	Not_differential
Cluster 2209	1369036	1547479	1.003756283	Yeast
Cluster 2210	1566792	1338733	0.0	Not_differential
Cluster 2221	1346588	1470497	1.583949517	Yeast
Cluster 2232	1595680	1491770	-5.939069077	Mycelium
Cluster 2239	1148843	1366537	-3.52472138	Mycelium
Cluster 2240	1499436	1499434	0.0	Not_differential
Cluster 2242	1510801	1385506	1.983837255	Yeast
Cluster 2246	1599050	1527921	1.713593346	Yeast
Cluster 2251	1365588	1533581	1.966039996	Yeast
Cluster 2253	1469585	1350309	0.0	Not_differential
Cluster 2260	1590806	1544229	0.0	Not_differential
Cluster 2267	1510043	1510047	-2.660140227	Mycelium
Cluster 2271	1562600	1494676	-4.13983361	Mycelium
Cluster 2272	1599666	1535093	-5.836162901	Mycelium
Cluster 2273	1599863	1450791	0.0	Not_differential
Cluster 2274	1474672	1474666	-5.395068636	Mycelium
Cluster 2276	1525852	1128237	-1.031024224	Mycelium
Cluster 2279	1453634	1001405	-5.578918822	Mycelium
Cluster 2286	1588502	1519360	-8.108903517	Mycelium
Cluster 2289	1369598	1549701	-1.113339704	Mycelium
Cluster 2291	1462044	1462050	-1.794965772	Mycelium
Cluster 2301	1351740	1476619	-3.01574441	Mycelium
Cluster 2309	1549816	1452110	3.315580848	Yeast
Cluster 2314	1466808	1466816	1.769331618	Yeast
Cluster 2316	1544446	1160645	-1.431939806	Mycelium
Cluster 2318	1365018	1531186	-4.875948408	Mycelium
Cluster 2333	1531515	1531510	-2.265771481	Mycelium
Cluster 2334	1540187	1540181	2.403436134	Yeast
Cluster 2335	1541540	1541522	1.537971748	Yeast
Cluster 2342	1511317	1511318	-9.716613263	Mycelium
Cluster 2345	1351860	1477078	2.666985523	Yeast
Cluster 2348	1517218	1576877	-2.134736546	Mycelium
Cluster 2350	1533794	1533789	2.403352933	Yeast
Cluster 2353	1370120	1601272	1.307365201	Yeast
Cluster 2354	1386663	1515781	0.0	Not_differential
Cluster 2358	1508018	1508020	0.0	Not_differential
Cluster 2360	1518226	1518232	0.0	Not_differential
Cluster 2363	1547701	1547714	0.0	Not_differential
Cluster 2374	1483811	1483805	0.0	Not_differential
Cluster 2377	1531697	1599361	1.24259636	Yeast
Cluster 2378	1533700	1365601	1.686279009	Yeast
Cluster 2380	1542840	1367862	0.0	Not_differential
Cluster 2381	1550742	1417419	0.0	Not_differential
Cluster 2382	1553967	1452573	-1.981119493	Mycelium
Cluster 2385	1598085	1113119	0.0	Not_differential
Cluster 2397	1556780	1571274	0.0	Not_differential
Cluster 2401	1456582	1456584	1.412503314	Yeast
Cluster 2401	1489536	1489534	-7.848910042	Mycelium
Cluster 2401	1568882	1346017	-1.350872847	Mycelium
Cluster 2404	1392520	1540086	0.0	Not_differential
Cluster 2416	1480015	1480020	-4.558505553	Mycelium
Cluster 2417	1504078	1504072	0.0	Not_differential
Cluster 2424	1597839	1515076	2.195262758	Yeast
Cluster 2425	1571274	1556780	-6.66591899	Mycelium
Cluster 2426	1478832	1478828	0.0	Not_differential
Cluster 2430	1595391	1354667	4.577005229	Yeast
Cluster 2433	1475458	1475462	-7.349116135	Mycelium
Cluster 2435	1361179	1515248	1.935161582	Yeast
Cluster 2435	1495930	1586285	0.0	Not_differential
Cluster 2436	1527407	1527413	-3.972913101	Mycelium
Cluster 2439	1366356	1391698	-1.607292586	Mycelium
Cluster 2442	1506663	1506660	-1.332001617	Mycelium
Cluster 2445	1594485	1046970	0.0	Not_differential
Cluster 2448	1463790	1463786	3.604364954	Yeast
Cluster 2450	1478677	1478682	0.0	Not_differential
Cluster 2451	1355173	1585777	2.12025683	Yeast
Cluster 2452	1505111	1505112	3.222398342	Yeast
Cluster 2453	1524418	1524425	-1.01096958	Mycelium
Cluster 2455	1355503	1331398	3.072727866	Yeast
Cluster 2455	1533515	1533506	-5.464266083	Mycelium
Cluster 2455	1559204	1461375	9.267883313	Yeast
Cluster 2461	1520518	1520511	1.968110469	Yeast
Cluster 2467	1601233	1551302	0.0	Not_differential
Cluster 2469	1442637	1457836	0.0	Not_differential
Cluster 2470	1008750	1347454	0.0	Not_differential
Cluster 2470	1471890	1471900	-1.858412076	Mycelium
Cluster 2471	1508544	1597234	-2.921937926	Mycelium
Cluster 2479	1463314	1374151	-1.832593395	Mycelium
Cluster 2483	1500712	1563211	-9.237551432	Mycelium
Cluster 2484	1347570	1458400	-1.970011023	Mycelium
Cluster 2489	1502740	1502735	-2.523121912	Mycelium
Cluster 2491	1519048	1519044	4.452626175	Yeast
Cluster 2492	1536862	1536851	2.806401794	Yeast
Cluster 2493	1358118	1502623	1.098455636	Yeast
Cluster 2501	1466150	1570595	0.0	Not_differential
Cluster 2501	1541460	1541450	2.062259031	Yeast
Cluster 2505	1384491	1506803	2.826275771	Yeast
Cluster 2506	1471804	1376005	0.0	Not_differential
Cluster 2508	1511347	1511344	-4.019439457	Mycelium
Cluster 2516	1382732	1499893	-1.78154713	Mycelium
Cluster 2517	1454548	1454542	-2.428715144	Mycelium
Cluster 2521	1535864	1366139	-3.260312804	Mycelium
Cluster 2525	1519586	1519581	-7.549684077	Mycelium
Cluster 2525	1562251	1491389	-3.144730401	Mycelium
Cluster 2535	1474666	1474672	-5.220850677	Mycelium
Cluster 2536	1484397	1379016	0.0	Not_differential
Cluster 2536	1546068	1546064	0.0	Not_differential
Cluster 2550	1468936	1468929	2.122916193	Yeast
Cluster 2551	1508116	1096820	0.0	Not_differential
Cluster 2555	1544309	1544304	0.0	Not_differential
Cluster 2558	1388838	1524577	1.675537348	Yeast
Cluster 2560	1544569	1416742	-1.859968491	Mycelium
Cluster 2568	1495588	1495578	2.00269748	Yeast
Cluster 2570	1547059	1547057	0.0	Not_differential
Cluster 2577	1515605	1515603	1.795728936	Yeast
Cluster 2581	1359344	1507629	-2.355302458	Mycelium
Cluster 2582	1458164	1569662	0.0	Not_differential
Cluster 2583	1460859	1442955	0.0	Not_differential
Cluster 2600	1548977	1548982	1.470121611	Yeast
Cluster 2601	1522411	1522421	-4.116081597	Mycelium
Cluster 2612	1542027	1542033	1.483074747	Yeast
Cluster 2613	1325216	1485870	0.0	Not_differential
Cluster 2622	1563211	1500712	0.0	Not_differential
Cluster 2623	1580835	1549200	0.0	Not_differential
Cluster 2626	1470027	1470026	-3.34274417	Mycelium
Cluster 2627	1508743	1508749	2.587902287	Yeast
Cluster 2628	1536367	1536368	2.074063425	Yeast
Cluster 2629	1557296	1557293	1.219561232	Yeast
Cluster 2646	1519581	1519586	-2.715859401	Mycelium
Cluster 2646	1587720	1511228	1.197517361	Yeast
Cluster 2648	1564778	1516079	-5.606598703	Mycelium
Cluster 2649	1541792	1156571	-4.371062016	Mycelium
Cluster 2651	1544031	1544036	-1.420631192	Mycelium
Cluster 2668	1444467	1475924	2.274209235	Yeast
Cluster 2675	1489483	1489486	2.868321678	Yeast
Cluster 2677	1111419	1516818	0.0	Not_differential
Cluster 2683	1507441	1507437	2.634325444	Yeast
Cluster 2697	1458415	1009533	1.23826181	Yeast
Cluster 2701	1538053	1538050	0.0	Not_differential
Cluster 2709	1512664	1512663	2.199765554	Yeast
Cluster 2711	1532173	1532171	-1.987447615	Mycelium
Cluster 2719	1557900	1371392	-2.87762346	Mycelium
Cluster 2721	1354963	1354959	-1.778125084	Mycelium
Cluster 2738	1459363	1459364	4.311098979	Yeast
Cluster 2746	1477271	1351906	-1.51546636	Mycelium
Cluster 2753	1412038	1498794	0.0	Not_differential
Cluster 2755	1556846	1556854	-1.922881856	Mycelium
Cluster 2762	1393740	1545051	0.0	Not_differential
Cluster 2763	1468031	1468027	5.531555436	Yeast
Cluster 2780	1490448	1355118	0.0	Not_differential
Cluster 2791	1444474	1314023	0.0	Not_differential
Cluster 2793	1507629	1359344	0.0	Not_differential
Cluster 2797	1570897	1468674	3.397451608	Yeast
Cluster 2812	1526573	1526571	1.057966401	Yeast
Cluster 2816	1486877	1486866	1.410991519	Yeast
Cluster 2818	1541149	1451197	0.0	Not_differential
Cluster 2820	1540612	1540617	1.246310674	Yeast
Cluster 2821	1541708	1541717	-2.217103785	Mycelium
Cluster 2825	1496978	1496982	-4.096457715	Mycelium
Cluster 2829	1485755	1595112	-6.56286332	Mycelium
Cluster 2833	1533987	1439343	3.765242913	Yeast
Cluster 2839	1462183	1348570	3.008268827	Yeast
Cluster 2841	1477078	1351860	-2.735216979	Mycelium
Cluster 2845	1345849	1556604	-2.390716533	Mycelium
Cluster 2854	1521179	1521186	0.0	Not_differential
Cluster 2865	1478980	1478969	1.697412981	Yeast
Cluster 2868	1554288	1396117	-2.444137666	Mycelium
Cluster 2878	1493764	1493772	2.026860985	Yeast
Cluster 2883	1489424	1489427	1.33056996	Yeast
Cluster 2890	1496889	1496886	-1.906836689	Mycelium
Cluster 2890	1502983	1447255	-1.698496903	Mycelium
Cluster 2899	1471652	1471653	4.366906456	Yeast
Cluster 2901	1525837	1525833	0.0	Not_differential
Cluster 2903	1528630	1528637	-5.670347325	Mycelium
Cluster 2909	1460383	1460379	2.904619536	Yeast
Cluster 2911	1476547	1476551	-2.805842075	Mycelium
Cluster 2924	1518310	1518313	2.389523381	Yeast
Cluster 2928	1518395	1362017	-8.265395968	Mycelium
Cluster 2933	1151236	1539098	-6.915063581	Mycelium
Cluster 2935	1494830	1356177	4.935376489	Yeast
Cluster 2942	1363657	1525214	0.0	Not_differential
Cluster 2952	1504297	1504306	2.962983539	Yeast
Cluster 2952	1516224	1110088	-1.629407407	Mycelium
Cluster 2954	1578668	1589649	-2.965829426	Mycelium
Cluster 2963	1465479	1465482	-2.034487211	Mycelium
Cluster 2967	1531626	1365138	-2.095191847	Mycelium
Cluster 2971	1489301	1489299	0.0	Not_differential
Cluster 2972	1494054	1494052	0.0	Not_differential
Cluster 2978	1327596	1560238	1.853194848	Yeast
Cluster 2982	1462138	1462137	-2.333587599	Mycelium
Cluster 2983	1471125	1471126	1.540603816	Yeast
Cluster 2986	1496113	1381853	1.61617359	Yeast
Cluster 2987	1497653	1328193	2.168869217	Yeast
Cluster 2989	1517252	1361740	-1.821393678	Mycelium
Cluster 2994	1380598	1490871	1.66665454	Yeast
Cluster 2996	1411183	1490522	1.016079447	Yeast
Cluster 2999	1492669	1492666	-2.842542446	Mycelium
Cluster 3000	1525756	1389137	2.823104798	Yeast
Cluster 3007	1599758	1536011	-2.029051501	Mycelium
Cluster 3008	1016555	1559317	1.218838965	Yeast
Cluster 3011	1372654	1457119	-1.444923723	Mycelium
Cluster 3015	1474403	1474398	1.360145581	Yeast
Cluster 3018	1508749	1508743	-2.541592575	Mycelium
Cluster 3019	1515118	1515115	-1.894638751	Mycelium
Cluster 3022	1449839	1527441	0.0	Not_differential
Cluster 3025	1377029	1476301	1.197968163	Yeast
Cluster 3036	1526943	1526937	1.041438351	Yeast
Cluster 3040	1482346	1353135	0.0	Not_differential
Cluster 3042	1350665	1034856	1.000424622	Yeast
Cluster 3044	1454119	1454116	0.0	Not_differential
Cluster 3047	1495676	1381758	0.0	Not_differential
Cluster 3051	1507673	1507670	2.067293328	Yeast
Cluster 3051	1590915	1545523	1.766359029	Yeast
Cluster 3054	1601069	1549723	0.0	Not_differential
Cluster 3057	1485455	1353914	2.387861235	Yeast
Cluster 3074	1503604	1596776	1.009154367	Yeast
Cluster 3075	1528612	1528597	-2.177310052	Mycelium
Cluster 3087	1542431	1542428	-1.519491687	Mycelium
Cluster 3097	1458400	1347570	0.0	Not_differential
Cluster 3105	1368535	1545653	2.660287276	Yeast
Cluster 3105	1570085	1461684	-1.737613563	Mycelium
Cluster 3123	1376222	1584109	2.755243767	Yeast
Cluster 3125	1516201	1516197	6.689383922	Yeast
Cluster 3128	1570160	1559304	0.0	Not_differential
Cluster 3130	1485631	1410655	1.913774914	Yeast
Cluster 3134	1533663	1533665	-1.354103586	Mycelium
Cluster 3138	1347525	1458152	-5.041280137	Mycelium
Cluster 3145	1516818	1111419	-3.699037387	Mycelium
Cluster 3149	1593109	1464386	-4.952164494	Mycelium
Cluster 3150	1292418	1327113	0.0	Not_differential
Cluster 3152	1469197	1443812	-1.371834661	Mycelium
Cluster 3159	1568132	1549732	2.133265694	Yeast
Cluster 3163	1368904	1591057	1.461530118	Yeast
Cluster 3165	1446132	1355516	1.224909166	Yeast
Cluster 3166	1456862	1456861	1.644338424	Yeast
Cluster 3171	1019783	1583336	-9.585226555	Mycelium
Cluster 3182	1538254	1590236	3.30910394	Yeast
Cluster 3183	1544036	1544031	0.0	Not_differential
Cluster 3185	1586768	1501215	1.483159809	Yeast
Cluster 3190	1458664	1458659	1.191505588	Yeast
Cluster 3195	1502735	1502740	-4.45349289	Mycelium
Cluster 3196	1509123	1509116	-3.052412394	Mycelium
Cluster 3197	1556564	1601665	2.969321417	Yeast
Cluster 3202	1379016	1484397	0.0	Not_differential
Cluster 3202	1546064	1546068	2.435776399	Yeast
Cluster 3223	1542492	1600367	0.0	Not_differential
Cluster 3227	1128859	1335409	-3.885058144	Mycelium
Cluster 3228	1478682	1478677	0.0	Not_differential
Cluster 3230	1508248	1508251	-2.390973385	Mycelium
Cluster 3237	1444527	1476430	-7.035173809	Mycelium
Cluster 3238	1485491	1595084	-1.71531325	Mycelium
Cluster 3246	1455764	1455762	-4.092241509	Mycelium
Cluster 3249	1511360	1597513	-1.745353117	Mycelium
Cluster 3259	1544135	1544132	-1.266304035	Mycelium
Cluster 3266	1470940	1443996	1.22019899	Yeast
Cluster 3270	1486511	1573186	0.0	Not_differential
Cluster 3271	1488731	1488735	1.200412489	Yeast
Cluster 3277	1457119	1372654	-3.227566543	Mycelium
Cluster 3277	1457119	1320839	-3.227566543	Mycelium
Cluster 3279	1481600	1481607	-2.590382659	Mycelium
Cluster 3281	1494052	1494054	-2.008653124	Mycelium
Cluster 3285	1326364	1351014	2.144115868	Yeast
Cluster 3285	1488688	1488691	-1.620879541	Mycelium
Cluster 3288	1460464	1442916	-2.053887976	Mycelium
Cluster 3296	1548303	1548305	0.0	Not_differential
Cluster 3297	1560462	1473880	7.19341187	Yeast
Cluster 3301	1353914	1485455	0.0	Not_differential
Cluster 3303	1395134	1369800	2.670114135	Yeast
Cluster 3311	1498794	1412038	0.0	Not_differential
Cluster 3314	1517688	1517680	-1.110837523	Mycelium
Cluster 3321	1482068	1378442	0.0	Not_differential
Cluster 3333	1555852	1555854	2.105725656	Yeast
Cluster 3334	1493865	1493861	-1.22303257	Mycelium
Cluster 3339	1535316	1535320	-1.960363655	Mycelium
Cluster 3350	1492719	1492716	0.0	Not_differential
Cluster 3353	1512179	1103712	1.817726833	Yeast
Cluster 3355	1545208	1161672	-3.131400169	Mycelium
Cluster 3360	1362506	1520461	-1.250430292	Mycelium
Cluster 3362	1460150	1460142	0.0	Not_differential
Cluster 3365	1493509	1595824	0.0	Not_differential
Cluster 3370	1569885	1460200	-6.909281191	Mycelium
Cluster 3371	1451532	1368260	0.0	Not_differential
Cluster 3390	1341313	1600718	2.988528288	Yeast
Cluster 3390	1586714	1500658	-1.523418042	Mycelium
Cluster 3390	1590992	1580449	0.0	Not_differential
Cluster 3391	1591057	1368904	1.865600314	Yeast
Cluster 3391	1591578	1601305	-2.343441206	Mycelium
Cluster 3401	1522210	1522212	-3.529605174	Mycelium
Cluster 3406	1449754	1526629	1.932892526	Yeast
Cluster 3414	1447098	1501457	0.0	Not_differential
Cluster 3415	1455227	1372168	-3.52352831	Mycelium
Cluster 3424	1464498	1464505	3.327268841	Yeast
Cluster 3428	1501738	1501740	-1.559698792	Mycelium
Cluster 3429	1464628	1464620	1.517603873	Yeast
Cluster 3436	1478509	1478508	1.93454869	Yeast
Cluster 3438	1527329	1389541	0.0	Not_differential
Cluster 3451	1446755	1446754	-2.520595483	Mycelium
Cluster 3452	1472337	1444133	-2.209201835	Mycelium
Cluster 3453	1496240	1496234	0.0	Not_differential
Cluster 3456	1520884	1414357	1.099134186	Yeast
Cluster 3459	1532171	1532173	0.0	Not_differential
Cluster 3460	1540964	1540966	-1.302594038	Mycelium
Cluster 3462	1555746	1555734	-1.208372315	Mycelium
Cluster 3469	1472690	1472681	-1.152542597	Mycelium
Cluster 3471	1569662	1458164	-5.260279806	Mycelium
Cluster 3483	1374022	1462773	4.408044335	Yeast
Cluster 3486	1486813	1486817	0.0	Not_differential
Cluster 3490	1362225	1519253	-2.032648659	Mycelium
Cluster 3492	1484050	1484053	-1.869427595	Mycelium
Cluster 3497	1598614	1523183	2.533324994	Yeast
Cluster 3502	1463020	1463013	-6.524275392	Mycelium
Cluster 3503	1465369	1465371	0.0	Not_differential
Cluster 3508	1492697	1585975	-8.933680178	Mycelium
Cluster 3509	1493149	1493143	-1.186984833	Mycelium
Cluster 3512	1531416	1589603	1.146023233	Yeast
Cluster 3517	1359239	1507157	1.951674732	Yeast
Cluster 3526	1598942	1526810	1.734371665	Yeast
Cluster 3532	1461638	1461633	0.0	Not_differential
Cluster 3533	1490457	1490463	1.138677787	Yeast
Cluster 3533	1510400	1510406	0.0	Not_differential
Cluster 3534	1491192	1491188	0.0	Not_differential
Cluster 3542	1516509	1448695	0.0	Not_differential
Cluster 3548	1381038	1492673	-1.226860359	Mycelium
Cluster 3567	1455546	1455558	9.238303632	Yeast
Cluster 3569	1486817	1486813	-1.010081329	Mycelium
Cluster 3571	1504804	1358663	-1.165565102	Mycelium
Cluster 3575	1545051	1393740	0.0	Not_differential
Cluster 3576	1365920	1535006	1.507141544	Yeast
Cluster 3579	1502623	1358118	0.0	Not_differential
Cluster 3590	1384442	1506641	0.0	Not_differential
Cluster 3601	1442955	1460859	0.0	Not_differential
Cluster 3605	1487915	1487911	1.393428999	Yeast
Cluster 3606	1489493	1562057	-2.296675606	Mycelium
Cluster 3615	1513155	1360710	1.102865184	Yeast
Cluster 3628	1540169	1440052	-1.564773524	Mycelium
Cluster 3640	1459642	1347914	0.0	Not_differential
Cluster 3641	1461192	1461193	-3.445806879	Mycelium
Cluster 3644	1502046	1502039	0.0	Not_differential
Cluster 3647	1545916	1451668	1.66392523	Yeast
Cluster 3651	1476147	1476152	-4.761275447	Mycelium
Cluster 3655	1446094	1573936	1.794067025	Yeast
Cluster 3662	1534282	1142553	-3.642068511	Mycelium
Cluster 3673	1528708	1528706	1.225527347	Yeast
Cluster 3679	1469931	1469926	-1.471052776	Mycelium
Cluster 3687	1147952	1439679	-1.591911476	Mycelium
Cluster 3688	1367109	1392454	0.0	Not_differential
Cluster 3688	1489161	1585609	1.71582536	Yeast
Cluster 3692	1491636	1491632	-1.942828045	Mycelium
Cluster 3696	1396117	1554288	-3.219416599	Mycelium
Cluster 3699	1510008	1510014	1.44226458	Yeast
Cluster 3714	1523846	1523848	2.590599804	Yeast
Cluster 3715	1536729	1536723	-2.909138882	Mycelium
Cluster 3717	1569123	1454622	0.0	Not_differential
Cluster 3721	1463755	1374243	1.656570951	Yeast
Cluster 3722	1492197	1492193	0.0	Not_differential
Cluster 3726	1349781	1467678	1.127271904	Yeast
Cluster 3728	1507096	1507100	-1.328636764	Mycelium
Cluster 3736	1545305	1545304	0.0	Not_differential
Cluster 3739	1471155	1471150	1.024998012	Yeast
Cluster 3742	1582431	1454956	1.454610651	Yeast
Cluster 3745	1459909	1459913	0.0	Not_differential
Cluster 3751	1547824	1547830	-1.025346628	Mycelium
Cluster 3757	1460748	1460753	1.194701157	Yeast
Cluster 3758	1459510	1442810	-1.503183608	Mycelium
Cluster 3758	1473818	1376476	1.65209369	Yeast
Cluster 3764	1521483	1588698	0.0	Not_differential
Cluster 3764	1523152	1523163	-1.932993432	Mycelium
Cluster 3765	1524773	1524768	-7.047957503	Mycelium
Cluster 3766	1531200	1365027	0.0	Not_differential
Cluster 3774	1388382	1522612	0.0	Not_differential
Cluster 3778	1536723	1536729	3.063716077	Yeast
Cluster 3779	1544759	1544770	0.0	Not_differential
Cluster 3789	1550607	1550603	0.0	Not_differential
Cluster 3796	1488474	1433989	1.277092089	Yeast
Cluster 3798	1517075	1517081	-1.908819962	Mycelium
Cluster 3799	1521186	1521179	-3.329877464	Mycelium
Cluster 3807	1452957	1452967	3.19032015	Yeast
Cluster 3811	1452967	1452957	2.818438621	Yeast
Cluster 3816	1380115	1354749	0.0	Not_differential
Cluster 3817	1481330	1481333	0.0	Not_differential
Cluster 3820	1522275	1362933	1.708935293	Yeast
Cluster 3829	1369800	1395134	0.0	Not_differential
Cluster 3831	1385076	1509277	-2.178028047	Mycelium
Cluster 3838	1083862	1500572	0.0	Not_differential
Cluster 3839	1487335	1487336	4.889755151	Yeast
Cluster 3846	1486703	1486686	-2.252562	Mycelium
Cluster 3849	1542059	1542057	1.239136294	Yeast
Cluster 3855	1467079	1467081	1.735458549	Yeast
Cluster 3861	1536870	1536873	-2.374431935	Mycelium
Cluster 3885	1596696	1502638	-4.439113343	Mycelium
Cluster 3888	1353146	1482372	-1.841548916	Mycelium
Cluster 3891	1462050	1462044	0.0	Not_differential
Cluster 3892	1476436	1476439	-1.415749889	Mycelium
Cluster 3893	1484487	1561552	0.0	Not_differential
Cluster 3896	1531272	1317116	-1.255459219	Mycelium
Cluster 3909	1355118	1490448	0.0	Not_differential
Cluster 3913	1439679	1147952	-2.16772081	Mycelium
Cluster 3915	1514228	1514229	0.0	Not_differential
Cluster 3919	1460103	1460102	2.591805863	Yeast
Cluster 3924	1351053	1376427	-1.38858925	Mycelium
Cluster 3931	1531888	1531893	1.763530646	Yeast
Cluster 3933	1542796	1542807	1.565699737	Yeast
Cluster 3934	1520573	1520585	3.08615337	Yeast
Cluster 3937	1336367	1524729	-2.434004214	Mycelium
Cluster 3948	1600489	1543884	-1.2639554	Mycelium
Cluster 3949	1396025	1396020	2.744447237	Yeast
Cluster 3953	1493861	1493865	0.0	Not_differential
Cluster 3964	1385726	1511602	-2.03776168	Mycelium
Cluster 3976	1586347	1496529	-5.74379002	Mycelium
Cluster 3990	1508554	1587461	-7.596953661	Mycelium
Cluster 3995	1474371	1474373	0.0	Not_differential
Cluster 4001	1499016	1499013	1.209796834	Yeast
Cluster 4010	1344170	1551795	-1.494002851	Mycelium
Cluster 4011	1460379	1460383	-1.154398271	Mycelium
Cluster 4015	1544132	1544135	0.0	Not_differential
Cluster 4019	1451974	1600961	0.0	Not_differential
Cluster 4027	1551879	1551875	3.506767671	Yeast
Cluster 4033	1446869	1499344	0.0	Not_differential
Cluster 4039	1538212	1538215	3.832900373	Yeast
Cluster 4041	1596423	1499904	0.0	Not_differential
Cluster 4044	1457591	1442612	1.390961319	Yeast
Cluster 4047	1496835	1496831	-1.271199805	Mycelium
Cluster 4052	1553343	1568504	-2.751350863	Mycelium
Cluster 4054	1594914	1483665	-7.112948254	Mycelium
Cluster 4060	1532543	1139480	-3.917260519	Mycelium
Cluster 4061	1535314	1535307	1.280726629	Yeast
Cluster 4062	1538481	1590251	-1.08423716	Mycelium
Cluster 4063	1543702	1368060	-1.18768833	Mycelium
Cluster 4068	1335238	1514279	-4.25296722	Mycelium
Cluster 4080	1516804	1516801	-3.195069719	Mycelium
Cluster 4082	1598350	1520382	0.0	Not_differential
Cluster 4085	1347914	1459642	0.0	Not_differential
Cluster 4103	1463013	1463020	-1.564313037	Mycelium
Cluster 4104	1469038	1375552	1.128723475	Yeast
Cluster 4105	1478311	1377489	0.0	Not_differential
Cluster 4110	1516838	1516830	1.128903493	Yeast
Cluster 4125	1352308	1479123	-11.12660659	Mycelium
Cluster 4129	1496886	1496889	1.364945282	Yeast
Cluster 4135	1387688	1519792	1.694384786	Yeast
Cluster 4136	1392327	1366981	-6.1665237	Mycelium
Cluster 4142	1549906	1452120	2.217308759	Yeast
Cluster 4144	1552096	1568382	1.625958394	Yeast
Cluster 4154	1530619	1530624	4.569196347	Yeast
Cluster 4156	1544020	1544017	-1.637421986	Mycelium
Cluster 4164	1444198	1473020	0.0	Not_differential
Cluster 4170	1509442	1509434	5.134948104	Yeast
Cluster 4171	1385661	1511387	-10.54041765	Mycelium
Cluster 4171	1511387	1385661	0.0	Not_differential
Cluster 4174	1586191	1330660	0.0	Not_differential
Cluster 4188	1387057	1448763	1.12426322	Yeast
Cluster 4190	1491458	1355369	-1.230454622	Mycelium
Cluster 4191	1499290	1499283	2.821023509	Yeast
Cluster 4194	1524471	1336474	-3.380169208	Mycelium
Cluster 4195	1531893	1531888	1.131587957	Yeast
Cluster 4196	1534358	1534357	0.0	Not_differential
Cluster 4198	1542215	1542202	0.0	Not_differential
Cluster 4201	1110088	1516224	-1.159270936	Mycelium
Cluster 4203	1370040	1551373	-7.113771896	Mycelium
Cluster 4205	1492666	1492669	0.0	Not_differential
Cluster 4217	1395147	1171205	-4.734673107	Mycelium
Cluster 4219	1499979	1499973	-1.767121598	Mycelium
Cluster 4219	1508731	1508729	0.0	Not_differential
Cluster 4220	1503235	1503237	1.808816165	Yeast
Cluster 4224	1555165	1370951	-2.80259828	Mycelium
Cluster 4226	1512497	1512495	2.01770538	Yeast
Cluster 4235	1508067	1563956	1.466715707	Yeast
Cluster 4240	1507100	1507096	1.072055618	Yeast
Cluster 4246	1452915	1452919	1.728830801	Yeast
Cluster 4251	1483176	1483184	2.401631417	Yeast
Cluster 4264	1534504	1589881	-3.221647338	Mycelium
Cluster 4274	1466816	1466808	1.687916277	Yeast
Cluster 4278	1515781	1386663	0.0	Not_differential
Cluster 4284	1466541	1466543	1.258182425	Yeast
Cluster 4291	1550037	1170661	0.0	Not_differential
Cluster 4292	1580727	1548664	-3.751273487	Mycelium
Cluster 4298	1525212	1525207	0.0	Not_differential
Cluster 4301	1387967	1520847	1.678718777	Yeast
Cluster 4324	1461193	1461192	-3.536991383	Mycelium
Cluster 4329	1511776	1511775	-6.614718434	Mycelium
Cluster 4335	1587029	1503924	-1.51579033	Mycelium
Cluster 4338	1347260	1457033	-3.339306154	Mycelium
Cluster 4340	1475563	1444433	-2.100998545	Mycelium
Cluster 4343	1498157	1498158	-7.754591711	Mycelium
Cluster 4345	1513023	1513020	-3.507253906	Mycelium
Cluster 4346	1526140	1526143	-3.679885258	Mycelium
Cluster 4347	1351014	1326364	7.253666805	Yeast
Cluster 4355	1373264	1459611	-3.459569055	Mycelium
Cluster 4364	1384036	1358675	-4.429366849	Mycelium
Cluster 4366	1456302	1456299	0.0	Not_differential
Cluster 4372	1523144	1449387	-3.261323908	Mycelium
Cluster 4374	1579495	1366857	2.168993493	Yeast
Cluster 4378	1360710	1513155	2.178646817	Yeast
Cluster 4378	1448086	1510844	-1.825285698	Mycelium
Cluster 4380	1484195	1484192	1.991182919	Yeast
Cluster 4381	1487070	1487062	1.518943766	Yeast
Cluster 4384	1530667	1530668	1.578601848	Yeast
Cluster 4389	1592381	1456539	2.035781696	Yeast
Cluster 4389	1601462	1568545	0.0	Not_differential
Cluster 4394	1541840	1541841	-3.776022367	Mycelium
Cluster 4401	1531186	1365018	1.616088914	Yeast
Cluster 4403	1557293	1557296	1.218186741	Yeast
Cluster 4413	1526629	1449754	0.0	Not_differential
Cluster 4415	1547479	1369036	0.0	Not_differential
Cluster 4416	1547635	1417078	-1.250312171	Mycelium
Cluster 4426	1601029	1568089	-3.416249803	Mycelium
Cluster 4429	1395723	1552589	-1.097839167	Mycelium
Cluster 4434	1538632	1538633	0.0	Not_differential
Cluster 4446	1467556	1467549	2.801896029	Yeast
Cluster 4454	1601305	1591578	0.0	Not_differential
Cluster 4457	1368060	1543702	0.0	Not_differential
Cluster 4461	1507614	1597150	1.013913115	Yeast
Cluster 4473	1469352	1469359	-3.288720692	Mycelium
Cluster 4475	1540181	1540187	-3.194771104	Mycelium
Cluster 4492	1547057	1547059	-9.586057424	Mycelium
Cluster 4493	1374450	1349083	-3.287512314	Mycelium
Cluster 4498	1498674	1498689	-1.996639	Mycelium
Cluster 4499	1517499	1517508	-3.420487351	Mycelium
Cluster 4517	1496831	1496835	-1.616956828	Mycelium
Cluster 4524	1597150	1507614	-7.38737643	Mycelium
Cluster 4532	1506652	1506643	0.0	Not_differential
Cluster 4534	1458539	1592588	3.019277876	Yeast
Cluster 4535	1573879	1380664	-3.292201856	Mycelium
Cluster 4539	1325814	1324878	4.899689191	Yeast
Cluster 4539	1339894	1566001	4.796966025	Yeast
Cluster 4540	1390728	1532744	0.0	Not_differential
Cluster 4545	1480198	1594582	-10.33044835	Mycelium
Cluster 4549	1511524	1102636	-3.773560539	Mycelium
Cluster 4552	1527817	1364309	-1.444838488	Mycelium
Cluster 4555	1380664	1573879	-3.008265027	Mycelium
Cluster 4556	1088334	1503370	2.200201679	Yeast
Cluster 4561	1538711	1538719	-2.662670543	Mycelium
Cluster 4566	1455908	1455904	0.0	Not_differential
Cluster 4578	1346466	1454648	-4.082841522	Mycelium
Cluster 4586	1511833	1360410	2.169281817	Yeast
Cluster 4591	1478759	1478761	7.221771893	Yeast
Cluster 4605	1544017	1544020	-1.576762076	Mycelium
Cluster 4606	1545653	1368535	0.0	Not_differential
Cluster 4607	1362017	1518395	1.310182844	Yeast
Cluster 4608	1496432	1496428	4.430240302	Yeast
Cluster 4609	1461375	1559204	7.136358352	Yeast
Cluster 4609	1533506	1533515	-5.518237735	Mycelium
Cluster 4619	1483422	1483414	-10.08799924	Mycelium
Cluster 4620	1509223	1509220	2.307208104	Yeast
Cluster 4629	1396098	1554216	1.014783008	Yeast
Cluster 4633	1478347	1478342	0.0	Not_differential
Cluster 4637	1499666	1382672	2.08394994	Yeast
Cluster 4639	1476439	1476436	2.178072338	Yeast
Cluster 4640	1516704	1386939	2.340802278	Yeast
Cluster 4643	1556444	1556448	1.624842502	Yeast
Cluster 4649	1477776	1477768	-5.759894038	Mycelium
Cluster 4651	1483487	1483491	1.131264343	Yeast
Cluster 4656	1546506	1546512	-1.096781319	Mycelium
Cluster 4662	1465371	1465369	-1.641559927	Mycelium
Cluster 4663	1480659	1378100	0.0	Not_differential
Cluster 4668	1517105	1517104	1.02468702	Yeast
Cluster 4669	1521023	1521024	2.673532733	Yeast
Cluster 4671	1542033	1542027	0.0	Not_differential
Cluster 4672	1555854	1555852	1.187915865	Yeast
Cluster 4674	1478875	1478878	-1.174363133	Mycelium
Cluster 4680	1509277	1385076	3.71343175	Yeast
Cluster 4681	1356478	1496083	-2.02391102	Mycelium
Cluster 4705	1458761	1458765	0.0	Not_differential
Cluster 4706	1466785	1408696	2.383182151	Yeast
Cluster 4708	1482372	1353146	2.281963096	Yeast
Cluster 4712	1545099	1600607	2.106078492	Yeast
Cluster 4714	1570377	1464414	0.0	Not_differential
Cluster 4718	1348102	1460431	-1.775266597	Mycelium
Cluster 4719	1348570	1462183	0.0	Not_differential
Cluster 4721	1386746	1516020	-1.659774223	Mycelium
Cluster 4723	1387164	1588338	2.2402022	Yeast
Cluster 4724	1447255	1502983	-2.046783736	Mycelium
Cluster 4727	1542925	1542924	0.0	Not_differential
Cluster 4728	1559527	1464965	-3.879485813	Mycelium
Cluster 4734	1356893	1497788	0.0	Not_differential
Cluster 4745	1346320	1582344	-1.381667276	Mycelium
Cluster 4747	1465166	1465157	2.172906576	Yeast
Cluster 4755	1551296	1172545	-1.160952198	Mycelium
Cluster 4756	1551524	1551529	1.108374193	Yeast
Cluster 4758	1353586	1484152	0.0	Not_differential
Cluster 4759	1457836	1442637	1.270396608	Yeast
Cluster 4763	1542807	1542796	-1.329029078	Mycelium
Cluster 4764	1543884	1600489	0.0	Not_differential
Cluster 4770	1484053	1484050	-2.216369035	Mycelium
Cluster 4773	1551875	1551879	1.339901375	Yeast
Cluster 4783	1381561	1356192	-2.326961516	Mycelium
Cluster 4784	1442365	1346800	5.224044227	Yeast
Cluster 4788	1467338	1467340	0.0	Not_differential
Cluster 4789	1492774	1446213	0.0	Not_differential
Cluster 4793	1534004	1534011	1.587661908	Yeast
Cluster 4797	1600987	1441086	0.0	Not_differential
Cluster 4805	1542428	1542431	0.0	Not_differential
Cluster 4817	1520511	1520518	2.096920886	Yeast
Cluster 4827	1495268	1495263	-1.352338384	Mycelium
Cluster 4829	1499904	1596423	-1.867070561	Mycelium
Cluster 4830	1500638	1357591	0.0	Not_differential
Cluster 4832	1515886	1515885	-5.387960948	Mycelium
Cluster 4842	1520285	1520293	0.0	Not_differential
Cluster 4842	1541865	1541866	-3.210231142	Mycelium
Cluster 4846	1378072	1480494	-3.355415751	Mycelium
Cluster 4856	1518313	1518310	1.056326993	Yeast
Cluster 4861	1478233	1572243	0.0	Not_differential
Cluster 4867	1552657	1591657	0.0	Not_differential
Cluster 4868	1556854	1556846	-4.094562966	Mycelium
Cluster 4871	1585572	1488753	0.0	Not_differential
Cluster 4872	1585612	1354762	1.933757348	Yeast
Cluster 4873	1177142	1553861	0.0	Not_differential
Cluster 4876	1452110	1549816	-2.129016745	Mycelium
Cluster 4878	1463601	1463599	-2.307602212	Mycelium
Cluster 4887	1503338	1503343	0.0	Not_differential
Cluster 4908	1599094	1566005	-1.720372194	Mycelium
Cluster 4910	1346179	1429877	-1.991612596	Mycelium
Cluster 4911	1505851	1358920	1.37647956	Yeast
Cluster 4911	1506145	1447584	-1.435455586	Mycelium
Cluster 4912	1390521	1531739	0.0	Not_differential
Cluster 4913	1448763	1387057	-2.093712009	Mycelium
Cluster 4926	1541014	1416378	-2.514104894	Mycelium
Cluster 4926	1600718	1341313	-2.608786461	Mycelium
Cluster 4928	1554971	1554964	0.0	Not_differential
Cluster 4934	1408696	1466785	0.0	Not_differential
Cluster 4939	1518991	1518994	-1.356364022	Mycelium
Cluster 4944	1474249	1324484	3.049826632	Yeast
Cluster 4944	1549279	1549285	1.973435599	Yeast
Cluster 4947	1461072	1461068	3.124687438	Yeast
Cluster 4948	1467132	1467119	-1.856635881	Mycelium
Cluster 4949	1471900	1471890	-2.238349295	Mycelium
Cluster 4958	1454622	1569123	-1.890912071	Mycelium
Cluster 4973	1479218	1479214	2.532222241	Yeast
Cluster 4976	1494428	1494432	2.396822729	Yeast
Cluster 4989	1493772	1493764	-2.555797703	Mycelium
Cluster 5000	1531442	1531438	0.0	Not_differential
Cluster 5001	1532085	1532090	0.0	Not_differential
Cluster 5003	1391836	1537405	1.363834207	Yeast
Cluster 5003	1538061	1538065	0.0	Not_differential
Cluster 5004	1369306	1451960	0.0	Not_differential
Cluster 5006	1389541	1527329	-2.210117337	Mycelium
Cluster 5007	1445276	1594929	-1.627414032	Mycelium
Cluster 5008	1542766	1542774	-1.579699253	Mycelium
Cluster 5014	1544178	1544182	-1.393767225	Mycelium
Cluster 5017	1463347	1463345	2.520501547	Yeast
Cluster 5021	1467081	1467079	6.440030718	Yeast
Cluster 5026	1540674	1540682	4.732221182	Yeast
Cluster 5030	1388014	1521050	-2.053413505	Mycelium
Cluster 5034	1512609	1512612	0.0	Not_differential
Cluster 5036	1292980	1432723	0.0	Not_differential
Cluster 5036	1570936	1559945	0.0	Not_differential
Cluster 5042	1351554	1475916	5.562272784	Yeast
Cluster 5042	1475916	1351554	2.248630188	Yeast
Cluster 5050	1532615	1365349	1.158095889	Yeast
Cluster 5058	1377489	1478311	2.475857149	Yeast
Cluster 5059	1463345	1463347	3.335421896	Yeast
Cluster 5065	1505647	1505643	0.0	Not_differential
Cluster 5066	1512999	1513001	1.699487388	Yeast
Cluster 5067	1531600	1531613	5.632291151	Yeast
Cluster 5073	1481607	1481600	1.66855385	Yeast
Cluster 5078	1355512	1492038	0.0	Not_differential
Cluster 5081	1510087	1510080	2.259911362	Yeast
Cluster 5087	1480169	1480168	2.66277883	Yeast
Cluster 5093	1448239	1512218	0.0	Not_differential
Cluster 5096	1482164	1482171	0.0	Not_differential
Cluster 5100	1545821	1545819	0.0	Not_differential
Cluster 5105	1519577	1598271	-2.180421221	Mycelium
Cluster 5106	1346461	1592211	0.0	Not_differential
Cluster 5115	1597455	1510759	1.998074343	Yeast
Cluster 5118	1364309	1527817	1.789004011	Yeast
Cluster 5126	1578714	1532530	-4.99358212	Mycelium
Cluster 5127	1032352	1557673	-2.795739751	Mycelium
Cluster 5129	1361253	1361249	-1.23436845	Mycelium
Cluster 5136	1438416	1525793	-2.07423845	Mycelium
Cluster 5141	1544092	1544096	-9.315911299	Mycelium
Cluster 5141	1544096	1544092	0.0	Not_differential
Cluster 5151	1407819	1458054	-1.642623082	Mycelium
Cluster 5157	1531613	1531600	-1.626918201	Mycelium
Cluster 5160	1523163	1523152	0.0	Not_differential
Cluster 5160	1588698	1521483	1.688214724	Yeast
Cluster 5178	1536230	1579152	1.033882297	Yeast
Cluster 5184	1469624	1469614	-3.350199237	Mycelium
Cluster 5186	1379047	1484482	-1.801722033	Mycelium
Cluster 5188	1459746	1459745	2.719650348	Yeast
Cluster 5191	1495824	1495827	1.815399917	Yeast
Cluster 5192	1499760	1499754	-4.109657806	Mycelium
Cluster 5193	1507599	1563907	-5.306552432	Mycelium
Cluster 5196	1538981	1538988	0.0	Not_differential
Cluster 5197	1548709	1548700	-2.581357935	Mycelium
Cluster 5210	1497458	1497461	0.0	Not_differential
Cluster 5211	1498158	1498157	2.623194775	Yeast
Cluster 5216	1555520	1452702	0.0	Not_differential
Cluster 5217	1365262	1532163	0.0	Not_differential
Cluster 5222	1455904	1455908	3.249468317	Yeast
Cluster 5236	1477768	1477776	3.399260391	Yeast
Cluster 5245	1449387	1523144	1.785061898	Yeast
Cluster 5247	1483593	1483595	1.665802114	Yeast
Cluster 5248	1484739	1595018	2.576374316	Yeast
Cluster 5258	1579152	1536230	0.0	Not_differential
Cluster 5262	1358887	1384248	-1.1057779	Mycelium
Cluster 5268	1474398	1474403	0.0	Not_differential
Cluster 5276	1374655	1465721	0.0	Not_differential
Cluster 5282	1523822	1523817	-5.478822516	Mycelium
Cluster 5288	1596437	1357427	-2.270619648	Mycelium
Cluster 5292	1467502	1467494	2.053251949	Yeast
Cluster 5301	1102636	1511524	-3.417195039	Mycelium
Cluster 5302	1378442	1482068	0.0	Not_differential
Cluster 5306	1494320	1494316	1.598883902	Yeast
Cluster 5307	1492716	1492719	2.740135717	Yeast
Cluster 5311	1391229	1534867	-3.543769971	Mycelium
Cluster 5312	1497996	1446740	4.082815206	Yeast
Cluster 5314	1539339	1539338	0.0	Not_differential
Cluster 5315	1477123	1584509	-3.950757804	Mycelium
Cluster 5331	1498092	1498099	-1.838950712	Mycelium
Cluster 5332	1499013	1499016	1.197849594	Yeast
Cluster 5333	1502039	1502046	1.249326731	Yeast
Cluster 5334	1505643	1505647	-1.203562964	Mycelium
Cluster 5337	1539299	1539293	0.0	Not_differential
Cluster 5344	1484542	1573006	-1.446922692	Mycelium
Cluster 5350	1551373	1370040	-1.240106088	Mycelium
Cluster 5376	1383835	1504105	-6.742057684	Mycelium
Cluster 5383	1488653	1379970	0.0	Not_differential
Cluster 5386	1513881	1437007	-1.408868153	Mycelium
Cluster 5390	1569918	1012669	0.0	Not_differential
Cluster 5391	1573936	1446094	-7.653682778	Mycelium
Cluster 5398	1463557	1018076	1.136340927	Yeast
Cluster 5399	1469227	1469221	-2.362696226	Mycelium
Cluster 5404	1488944	1488939	1.993786009	Yeast
Cluster 5411	1358715	1384074	-1.896088674	Mycelium
Cluster 5414	1442680	1458306	1.463649157	Yeast
Cluster 5415	1458911	1582818	1.24388246	Yeast
Cluster 5417	1465731	1465728	-2.027189906	Mycelium
Cluster 5420	1502912	1435721	0.0	Not_differential
Cluster 5423	1534261	1589857	1.674509328	Yeast
Cluster 5427	1446595	1496411	-1.507476554	Mycelium
Cluster 5431	1466364	1466356	-4.071525038	Mycelium
Cluster 5433	1503370	1088334	0.0	Not_differential
Cluster 5437	1524577	1388838	6.222282567	Yeast
Cluster 5442	1546179	1546181	-2.813705976	Mycelium
Cluster 5443	1557000	1556997	0.0	Not_differential
Cluster 5451	1468027	1468031	4.347433494	Yeast
Cluster 5458	1526841	1565843	2.103064693	Yeast
Cluster 5460	1548640	1548630	1.041665347	Yeast
Cluster 5462	1355208	1595590	4.409410202	Yeast
Cluster 5463	1586736	1084554	0.0	Not_differential
Cluster 5472	1536235	1415883	-5.568748217	Mycelium
Cluster 5473	1366139	1535864	0.0	Not_differential
Cluster 5484	1518160	1518154	-2.212954454	Mycelium
Cluster 5485	1520461	1362506	0.0	Not_differential
Cluster 5489	1599241	1530268	-8.188089746	Mycelium
Cluster 5494	1470497	1346588	-5.354903568	Mycelium
Cluster 5494	1478245	1478242	2.556698881	Yeast
Cluster 5498	1528999	1528995	0.0	Not_differential
Cluster 5500	1540624	1341214	0.0	Not_differential
Cluster 5513	1525207	1525212	2.923004092	Yeast
Cluster 5517	1537405	1391836	6.319612963	Yeast
Cluster 5519	1586480	1498154	0.0	Not_differential
Cluster 5522	1306200	1497286	5.812574509	Yeast
Cluster 5525	1394734	1548735	0.0	Not_differential
Cluster 5526	1396020	1396025	2.113121132	Yeast
Cluster 5529	1469926	1469931	8.376096889	Yeast
Cluster 5530	1491188	1491192	1.819049543	Yeast
Cluster 5540	1344511	1568082	0.0	Not_differential
Cluster 5544	1361789	1517468	-6.135718925	Mycelium
Cluster 5546	1376005	1471804	-4.140165649	Mycelium
Cluster 5550	1505703	1358871	-1.805467496	Mycelium
Cluster 5561	1492193	1492197	0.0	Not_differential
Cluster 5562	1494676	1562600	2.091217399	Yeast
Cluster 5566	1522212	1522210	0.0	Not_differential
Cluster 5568	1523848	1523846	5.038745401	Yeast
Cluster 5585	1389137	1525756	4.990062536	Yeast
Cluster 5589	1516250	1516247	0.0	Not_differential
Cluster 5590	1546834	1567818	-2.345626969	Mycelium
Cluster 5591	1553376	1601432	0.0	Not_differential
Cluster 5603	1490932	1490934	0.0	Not_differential
Cluster 5609	1513020	1513023	0.0	Not_differential
Cluster 5611	1531510	1531515	-2.226097925	Mycelium
Cluster 5624	1485059	1485046	3.818887766	Yeast
Cluster 5628	1328193	1497653	-8.042052647	Mycelium
Cluster 5631	1467102	1375008	2.225331612	Yeast
Cluster 5634	1498488	1498481	3.317654737	Yeast
Cluster 5635	1503936	1503944	0.0	Not_differential
Cluster 5636	1527813	1340513	1.644907095	Yeast
Cluster 5637	1528366	1528369	0.0	Not_differential
Cluster 5645	1457407	1320650	0.0	Not_differential
Cluster 5646	1463802	1559426	1.894047521	Yeast
Cluster 5647	1487336	1487335	-1.976746018	Mycelium
Cluster 5652	1557103	1557105	-3.784452174	Mycelium
Cluster 5655	1358871	1505703	-4.989932699	Mycelium
Cluster 5656	1362933	1522275	1.234909818	Yeast
Cluster 5664	1529853	1529855	4.049294325	Yeast
Cluster 5670	1150217	1599978	-1.431923001	Mycelium
Cluster 5670	1470803	1470806	0.0	Not_differential
Cluster 5677	1540086	1392520	0.0	Not_differential
Cluster 5678	1544870	1544868	1.936654928	Yeast
Cluster 5679	1550019	1550023	-2.166478903	Mycelium
Cluster 5683	1552616	1395733	-8.282076621	Mycelium
Cluster 5685	1385506	1510801	3.483245438	Yeast
Cluster 5689	1530812	1530811	0.0	Not_differential
Cluster 5692	1587461	1508554	-1.376883968	Mycelium
Cluster 5693	1377098	1042034	-5.747115947	Mycelium
Cluster 5701	1506294	1506296	-1.057449979	Mycelium
Cluster 5703	1538719	1538711	-2.412297351	Mycelium
Cluster 5704	1524435	1524442	5.341308657	Yeast
Cluster 5706	1556688	1556687	0.0	Not_differential
Cluster 5710	1551771	1551777	2.00215026	Yeast
Cluster 5713	1585446	1585445	-1.141658698	Mycelium
Cluster 5719	1516830	1516838	-1.075856276	Mycelium
Cluster 5724	1507157	1359239	2.509234616	Yeast
Cluster 5727	1520847	1387967	0.0	Not_differential
Cluster 5732	1357544	1563170	2.16947245	Yeast
Cluster 5741	1498154	1586480	-1.019397008	Mycelium
Cluster 5744	1510844	1448086	-3.472391479	Mycelium
Cluster 5746	1511570	1385707	0.0	Not_differential
Cluster 5753	1416378	1541014	-2.790804434	Mycelium
Cluster 5754	1448225	1448224	1.381370384	Yeast
Cluster 5757	1482382	1378526	-1.778213354	Mycelium
Cluster 5762	1538050	1538053	2.441453607	Yeast
Cluster 5763	1538472	1538476	0.0	Not_differential
Cluster 5764	1546254	1394045	3.805809311	Yeast
Cluster 5767	1589857	1534261	1.755242358	Yeast
Cluster 5788	1477825	1311981	-8.623385627	Mycelium
Cluster 5790	1527413	1527407	-1.851958769	Mycelium
Cluster 5791	1535093	1599666	1.098792282	Yeast
Cluster 5792	1541866	1541865	0.0	Not_differential
Cluster 5794	1586864	1586863	-2.209307102	Mycelium
Cluster 5798	1353499	1324337	-2.398709109	Mycelium
Cluster 5802	1456005	1346984	-1.057062692	Mycelium
Cluster 5804	1476283	1476281	0.0	Not_differential
Cluster 5807	1515865	1597924	-1.004646763	Mycelium
Cluster 5819	1430068	1372122	0.0	Not_differential
Cluster 5821	1489610	1489601	-5.737519244	Mycelium
Cluster 5822	1510462	1360061	1.007125584	Yeast
Cluster 5833	1517235	1517232	2.831603307	Yeast
Cluster 5833	1528484	1528481	2.346083449	Yeast
Cluster 5839	1465738	1465736	-4.491654993	Mycelium
Cluster 5845	1550061	1550058	3.937794443	Yeast
Cluster 5854	1476168	1376997	1.555606556	Yeast
Cluster 5857	1510814	1510816	-1.278992067	Mycelium
Cluster 5859	1542924	1542925	-1.828225914	Mycelium
Cluster 5867	1478508	1478509	-2.351914847	Mycelium
Cluster 5871	1489588	1354885	1.15845483	Yeast
Cluster 5872	1495417	1495413	-3.919531708	Mycelium
Cluster 5876	1527577	1527578	3.141419076	Yeast
Cluster 5879	1553861	1177142	1.940996665	Yeast
Cluster 5881	1572243	1478233	0.0	Not_differential
Cluster 5890	1084554	1586736	0.0	Not_differential
Cluster 5890	1515248	1361179	0.0	Not_differential
Cluster 5890	1586285	1495930	-5.680566313	Mycelium
Cluster 5893	1510014	1510008	0.0	Not_differential
Cluster 5894	1517104	1517105	0.0	Not_differential
Cluster 5895	1507670	1507673	-2.371253656	Mycelium
Cluster 5895	1545523	1590915	1.447010621	Yeast
Cluster 5899	1366387	1536916	1.417505752	Yeast
Cluster 5902	1519847	1519850	1.429695949	Yeast
Cluster 5906	1095027	1507069	0.0	Not_differential
Cluster 5907	1117019	1519623	1.211027522	Yeast
Cluster 5908	1366537	1148843	-6.525770358	Mycelium
Cluster 5910	1453733	1453734	-1.649321444	Mycelium
Cluster 5913	1480168	1480169	-3.077724371	Mycelium
Cluster 5915	1486866	1486877	1.588317596	Yeast
Cluster 5922	1566005	1599094	-4.723271667	Mycelium
Cluster 5925	1595779	1492917	0.0	Not_differential
Cluster 5930	1368260	1451532	4.473655698	Yeast
Cluster 5930	1456299	1456302	-1.065052672	Mycelium
Cluster 5931	1372168	1455227	-2.640188832	Mycelium
Cluster 5934	1454542	1454548	1.426248325	Yeast
Cluster 5945	1544802	1544807	2.649337796	Yeast
Cluster 5947	1510759	1597455	0.0	Not_differential
Cluster 5949	1531438	1531442	1.061483015	Yeast
Cluster 5953	1177218	1553884	1.542461494	Yeast
Cluster 5954	1375481	1468830	-1.723458061	Mycelium
Cluster 5969	1347705	1458814	2.621266243	Yeast
Cluster 5981	1553539	1581344	-1.83285801	Mycelium
Cluster 5982	1128237	1525852	-3.423479926	Mycelium
Cluster 5983	1512204	1385863	-1.788272785	Mycelium
Cluster 5984	1347454	1008750	-1.448389488	Mycelium
Cluster 5988	1522732	1363063	1.024555696	Yeast
Cluster 5996	1448695	1516509	0.0	Not_differential
Cluster 6000	1510394	1587640	2.066691263	Yeast
Cluster 6001	1530228	1530220	0.0	Not_differential
Cluster 6003	1556448	1556444	4.83400338	Yeast
Cluster 6010	1544229	1590806	2.050440403	Yeast
Cluster 6016	1506641	1384442	-2.761079846	Mycelium
Cluster 6017	1517081	1517075	0.0	Not_differential
Cluster 6028	1454116	1454119	1.18496422	Yeast
Cluster 6038	1366857	1579495	-2.118017432	Mycelium
Cluster 6041	1395163	1550399	0.0	Not_differential
Cluster 6043	1467686	1467688	1.327467259	Yeast
Cluster 6043	1530811	1530812	-4.590043608	Mycelium
Cluster 6045	1483887	1585128	0.0	Not_differential
Cluster 6048	1458765	1458761	-1.183964348	Mycelium
Cluster 6055	1363211	1523329	0.0	Not_differential
Cluster 6057	1458054	1407819	3.084089192	Yeast
Cluster 6062	1535231	1535233	0.0	Not_differential
Cluster 6063	1542234	1542238	0.0	Not_differential
Cluster 6069	1386939	1516704	1.09849887	Yeast
Cluster 6072	1095462	1359273	1.534893611	Yeast
Cluster 6076	1525957	1363839	-1.362241052	Mycelium
Cluster 6083	1336486	1524645	0.0	Not_differential
Cluster 6089	1447774	1332793	-2.936487672	Mycelium
Cluster 6090	1547714	1547701	-1.185104775	Mycelium
Cluster 6091	1507069	1095027	1.623301277	Yeast
Cluster 6095	1523940	1523934	1.922727902	Yeast
Cluster 6107	1541561	1367505	1.805446551	Yeast
Cluster 6108	1372134	1455114	-3.583590321	Mycelium
Cluster 6110	1597924	1515865	3.983484735	Yeast
Cluster 6110	1600630	1368463	1.435417178	Yeast
Cluster 6112	1124728	1565554	0.0	Not_differential
Cluster 6119	1505577	1447522	-1.165532036	Mycelium
Cluster 6122	1526557	1389330	1.640859665	Yeast
Cluster 6142	1346800	1442365	-7.716933328	Mycelium
Cluster 6143	1361249	1361253	-1.117409191	Mycelium
Cluster 6148	1538869	1538864	1.238561571	Yeast
Cluster 6161	1495413	1495417	-1.945072045	Mycelium
Cluster 6168	1350309	1469585	1.593157107	Yeast
Cluster 6169	1364399	1589336	-5.292789143	Mycelium
Cluster 6170	1365349	1532615	2.019726404	Yeast
Cluster 6175	1466597	1466604	2.121238902	Yeast
Cluster 6177	1479214	1479218	0.0	Not_differential
Cluster 6179	1495435	1356314	-2.351778903	Mycelium
Cluster 6181	1512663	1512664	3.55692638	Yeast
Cluster 6189	1379970	1488653	-5.152622925	Mycelium
Cluster 6195	1514229	1514228	3.112671689	Yeast
Cluster 6202	1474382	1474386	-1.584541485	Mycelium
Cluster 6203	1480113	1377954	0.0	Not_differential
Cluster 6210	1508834	1508835	-1.988667154	Mycelium
Cluster 6211	1511393	1511388	2.710289496	Yeast
Cluster 6214	1550603	1550607	0.0	Not_differential
Cluster 6225	1480020	1480015	0.0	Not_differential
Cluster 6228	1561039	1479544	2.960300657	Yeast
Cluster 6236	1489870	1445903	-3.332688879	Mycelium
Cluster 6255	1506643	1506652	2.124051814	Yeast
Cluster 6256	1524425	1524418	-3.366762823	Mycelium
Cluster 6266	1511240	1511243	-2.339768731	Mycelium
Cluster 6270	1336474	1524471	-6.872744575	Mycelium
Cluster 6271	1429968	1346373	2.715831401	Yeast
Cluster 6275	1435626	1502128	0.0	Not_differential
Cluster 6279	1480494	1378072	-2.006525836	Mycelium
Cluster 6281	1492326	1492321	1.153994049	Yeast
Cluster 6281	1533581	1365588	1.279491149	Yeast
Cluster 6282	1516049	1516043	0.0	Not_differential
Cluster 6283	1517042	1112021	-7.220464017	Mycelium
Cluster 6288	1553092	1601407	0.0	Not_differential
Cluster 6289	1555947	1555938	0.0	Not_differential
Cluster 6297	1452238	1550907	0.0	Not_differential
Cluster 6301	1516197	1516201	9.413558714	Yeast
Cluster 6305	1335409	1128859	-6.429872162	Mycelium
Cluster 6306	1367505	1541561	-2.019530309	Mycelium
Cluster 6309	1474119	1351177	1.303388389	Yeast
Cluster 6311	1513814	1513820	0.0	Not_differential
Cluster 6315	1540966	1540964	-4.490659771	Mycelium
Cluster 6322	1170661	1550037	2.060485569	Yeast
Cluster 6328	1443421	1322923	0.0	Not_differential
Cluster 6341	1361740	1517252	0.0	Not_differential
Cluster 6344	1458100	1458093	-1.40168983	Mycelium
Cluster 6346	1512307	1512295	3.11362557	Yeast
Cluster 6348	1516925	1361624	-1.167252364	Mycelium
Cluster 6351	1535789	1535786	-2.495237592	Mycelium
Cluster 6360	1341498	1545955	-3.210875825	Mycelium
Cluster 6374	1517215	1517212	-1.567721695	Mycelium
Cluster 6375	1536395	1599794	1.670200764	Yeast
Cluster 6376	1573006	1484542	-1.468670815	Mycelium
Cluster 6383	1491431	1491432	1.756221368	Yeast
Cluster 6385	1502080	1383337	2.557899164	Yeast
Cluster 6394	1353135	1482346	-1.010121829	Mycelium
Cluster 6399	1526139	1526128	0.0	Not_differential
Cluster 6409	1466604	1466597	-1.163724928	Mycelium
Cluster 6410	1481298	1481294	0.0	Not_differential
Cluster 6417	1447330	1503668	-10.12844239	Mycelium
Cluster 6419	1001405	1453634	-6.526040419	Mycelium
Cluster 6423	1378526	1482382	-8.483776168	Mycelium
Cluster 6426	1446232	1493019	-4.284156147	Mycelium
Cluster 6426	1507437	1507441	0.0	Not_differential
Cluster 6427	1460142	1460150	-1.506175809	Mycelium
Cluster 6436	1542603	1542607	0.0	Not_differential
Cluster 6437	1549200	1580835	0.0	Not_differential
Cluster 6441	1504105	1383835	0.0	Not_differential
Cluster 6445	1378995	1484321	-1.563726622	Mycelium
Cluster 6449	1489427	1489424	0.0	Not_differential
Cluster 6460	1533808	1533801	0.0	Not_differential
Cluster 6466	1452702	1555520	1.762140954	Yeast
Cluster 6469	1539826	1539833	1.162382366	Yeast
Cluster 6478	1459633	1459635	0.0	Not_differential
Cluster 6480	1502444	1596676	0.0	Not_differential
Cluster 6481	1516976	1516978	1.382674552	Yeast
Cluster 6497	1459039	1558964	-5.168090308	Mycelium
Cluster 6508	1596687	1502584	1.91155517	Yeast
Cluster 6509	1012669	1569918	4.161472317	Yeast
Cluster 6513	1514411	1514408	0.0	Not_differential
Cluster 6515	1528995	1528999	0.0	Not_differential
Cluster 6516	1538442	1366719	2.22493822	Yeast
Cluster 6518	1546512	1546506	-2.284127051	Mycelium
Cluster 6527	1459913	1459909	0.0	Not_differential
Cluster 6528	1487776	1487786	2.300259863	Yeast
Cluster 6535	1541717	1541708	-1.018669492	Mycelium
Cluster 6539	1476430	1444527	-8.948158103	Mycelium
Cluster 6540	1542150	1542151	-1.19949592	Mycelium
Cluster 6541	1579262	1147999	2.220904169	Yeast
Cluster 6541	1579272	1450769	-3.679676743	Mycelium
Cluster 6551	1448500	1514924	0.0	Not_differential
Cluster 6558	1505068	1596915	0.0	Not_differential
Cluster 6560	1519792	1387688	3.234577816	Yeast
Cluster 6564	1373068	1458792	0.0	Not_differential
Cluster 6570	1492285	1492288	-2.363399718	Mycelium
Cluster 6571	1524153	1524147	3.842807747	Yeast
Cluster 6575	1573186	1486511	0.0	Not_differential
Cluster 6580	1350091	1350093	-3.009067285	Mycelium
Cluster 6584	1493019	1446232	-1.902843407	Mycelium
Cluster 6586	1496428	1496432	2.777821476	Yeast
Cluster 6589	1518154	1518160	0.0	Not_differential
Cluster 6598	1374243	1463755	1.515234638	Yeast
Cluster 6601	1471996	1350683	0.0	Not_differential
Cluster 6603	1569326	1407619	5.664178108	Yeast
Cluster 6604	1598989	1527318	0.0	Not_differential
Cluster 6608	1391507	1566709	-9.936852965	Mycelium
Cluster 6610	1478242	1478245	0.0	Not_differential
Cluster 6620	1454771	1346483	-2.313104222	Mycelium
Cluster 6622	1510579	1100685	2.705415157	Yeast
Cluster 6623	1512495	1512497	0.0	Not_differential
Cluster 6624	1521024	1521023	2.064952951	Yeast
Cluster 6631	1357591	1500638	0.0	Not_differential
Cluster 6632	1389330	1526557	0.0	Not_differential
Cluster 6633	1430167	1430166	0.0	Not_differential
Cluster 6636	1459745	1459746	0.0	Not_differential
Cluster 6639	1490705	1595581	0.0	Not_differential
Cluster 6641	1528100	1528102	0.0	Not_differential
Cluster 6649	1354762	1585612	0.0	Not_differential
Cluster 6651	1429877	1346179	-1.101269371	Mycelium
Cluster 6655	1490880	1411219	-5.97626144	Mycelium
Cluster 6656	1502154	1502157	0.0	Not_differential
Cluster 6657	1524729	1336367	-2.051802237	Mycelium
Cluster 6658	1538988	1538981	0.0	Not_differential
Cluster 6664	1388477	1335537	5.958395174	Yeast
Cluster 6689	1550399	1395163	1.267414739	Yeast
Cluster 6693	1432723	1292980	0.0	Not_differential
Cluster 6693	1559945	1570936	0.0	Not_differential
Cluster 6700	1546146	1546156	-1.135410867	Mycelium
Cluster 6708	1378752	1483321	-3.615550506	Mycelium
Cluster 6709	1453132	1453124	2.52493607	Yeast
Cluster 6709	1494501	1494525	2.703628301	Yeast
Cluster 6709	1535117	1535140	3.026945975	Yeast
Cluster 6710	1460431	1348102	-2.21070879	Mycelium
Cluster 6715	1531739	1390521	0.0	Not_differential
Cluster 6716	1565371	1522078	0.0	Not_differential
Cluster 6718	1586235	1495508	0.0	Not_differential
Cluster 6720	1000774	1453284	1.423149817	Yeast
Cluster 6722	1458461	1458460	-1.397315191	Mycelium
Cluster 6724	1530582	1566189	3.79727961	Yeast
Cluster 6725	1471653	1471652	2.126624026	Yeast
Cluster 6730	1522078	1565371	-1.027938927	Mycelium
Cluster 6733	1551066	1551074	1.028099372	Yeast
Cluster 6734	1564354	1511848	-5.365340964	Mycelium
Cluster 6737	1596776	1503604	2.070690095	Yeast
Cluster 6740	1491770	1595680	-5.502170982	Mycelium
Cluster 6741	1468191	1468184	-9.700699105	Mycelium
Cluster 6744	1508822	1508829	-3.800773471	Mycelium
Cluster 6748	1517232	1517235	2.871881035	Yeast
Cluster 6749	1546569	1546568	1.211765904	Yeast
Cluster 6759	1490047	1445917	1.158489277	Yeast
Cluster 6765	1599902	1537683	1.196910235	Yeast
Cluster 6768	1453124	1453132	-1.825878934	Mycelium
Cluster 6768	1494525	1494501	-1.299490703	Mycelium
Cluster 6771	1489205	1489201	0.0	Not_differential
Cluster 6773	1527921	1599050	2.290552419	Yeast
Cluster 6783	1381695	1446491	2.802457003	Yeast
Cluster 6784	1385863	1512204	-2.596979382	Mycelium
Cluster 6789	1495543	1586244	3.548907599	Yeast
Cluster 6790	1526026	1526022	0.0	Not_differential
Cluster 6793	1586244	1495543	-11.65382275	Mycelium
Cluster 6796	1391973	1537999	-7.096902847	Mycelium
Cluster 6797	1395404	1370067	1.010191055	Yeast
Cluster 6798	1511775	1511776	5.750564357	Yeast
Cluster 6800	1519253	1362225	2.290689503	Yeast
Cluster 6804	1551777	1551771	0.0	Not_differential
Cluster 6810	1346984	1456005	0.0	Not_differential
Cluster 6812	1466411	1466422	2.290980157	Yeast
Cluster 6827	1478828	1478832	0.0	Not_differential
Cluster 6829	1483776	1483768	3.681144541	Yeast
Cluster 6841	1452377	1552209	0.0	Not_differential
Cluster 6842	1522398	1522390	0.0	Not_differential
Cluster 6850	1314023	1444474	0.0	Not_differential
Cluster 6851	1382004	1382007	0.0	Not_differential
Cluster 6852	1411847	1496782	-2.023009845	Mycelium
Cluster 6854	1463469	1463474	0.0	Not_differential
Cluster 6855	1492288	1492285	3.044204897	Yeast
Cluster 6861	1515115	1515118	-2.949300977	Mycelium
Cluster 6868	1010138	1442722	-7.072565966	Mycelium
Cluster 6872	1448306	1512912	0.0	Not_differential
Cluster 6873	1461684	1570085	-9.028015799	Mycelium
Cluster 6876	1490463	1490457	0.0	Not_differential
Cluster 6876	1510406	1510400	3.037518378	Yeast
Cluster 6877	1536916	1366387	-4.657914103	Mycelium
Cluster 6882	1354885	1489588	-1.427913142	Mycelium
Cluster 6899	1535961	1599753	-1.401705484	Mycelium
Cluster 6911	1502157	1502154	0.0	Not_differential
Cluster 6913	1478878	1478875	0.0	Not_differential
Cluster 6916	1564306	1511495	-7.425601704	Mycelium
Cluster 6922	1372122	1430068	0.0	Not_differential
Cluster 6924	1439343	1533987	1.721063815	Yeast
Cluster 6926	1461449	1583067	-2.053374439	Mycelium
Cluster 6928	1472610	1472606	0.0	Not_differential
Cluster 6930	1528481	1528484	1.015708253	Yeast
Cluster 6933	1551795	1344170	-1.429359133	Mycelium
Cluster 6934	1564487	1448331	-2.380633303	Mycelium
Cluster 6935	1568134	1549737	-1.078348394	Mycelium
Cluster 6951	1551074	1551066	0.0	Not_differential
Cluster 6954	1384539	1506979	-1.661859706	Mycelium
Cluster 6962	1542357	1542350	1.933566331	Yeast
Cluster 6966	1331398	1355503	5.793442902	Yeast
Cluster 6967	1342711	1537139	2.453188794	Yeast
Cluster 6974	1517149	1517144	4.954739704	Yeast
Cluster 6983	1448331	1564487	3.493945104	Yeast
Cluster 6987	1525214	1363657	0.0	Not_differential
Cluster 6990	1576505	1513940	0.0	Not_differential
Cluster 7001	1465946	1465948	1.671008186	Yeast
Cluster 7003	1491583	1491578	1.604037481	Yeast
Cluster 7008	1142553	1534282	4.370115019	Yeast
Cluster 7011	1368463	1600630	3.865412738	Yeast
Cluster 7017	1535560	1566660	0.0	Not_differential
Cluster 7019	1511318	1511317	1.400862055	Yeast
Cluster 7020	1525029	1525026	0.0	Not_differential
Cluster 7021	1525793	1438416	-1.46521377	Mycelium
Cluster 7022	1538143	1538145	-6.597936449	Mycelium
Cluster 7025	1550907	1452238	-1.528257534	Mycelium
Cluster 7029	1349700	1431505	-4.698584594	Mycelium
Cluster 7030	1407619	1569326	3.379138736	Yeast
Cluster 7031	1437097	1437098	0.0	Not_differential
Cluster 7033	1455762	1455764	2.622904705	Yeast
Cluster 7041	1491389	1562251	1.15437475	Yeast
Cluster 7046	1518994	1518991	1.852243062	Yeast
Cluster 7047	1533828	1566510	0.0	Not_differential
Cluster 7059	1432223	1473169	0.0	Not_differential
Cluster 7084	1467507	1349753	2.511444942	Yeast
Cluster 7085	1470086	1443910	0.0	Not_differential
Cluster 7087	1485669	1379339	1.388043764	Yeast
Cluster 7094	1572402	1479505	-1.243593265	Mycelium
Cluster 7103	1372550	1592410	-3.076808956	Mycelium
Cluster 7106	1392525	1540112	0.0	Not_differential
Cluster 7106	1576877	1517218	0.0	Not_differential
Cluster 7108	1454558	1454556	1.911985645	Yeast
Cluster 7111	1512425	1448262	-2.133531553	Mycelium
Cluster 7115	1503379	1358291	1.318652247	Yeast
Cluster 7118	1516854	1361616	0.0	Not_differential
Cluster 7122	1548305	1548303	0.0	Not_differential
Cluster 7124	1018076	1463557	0.0	Not_differential
Cluster 7126	1346373	1429968	1.629411204	Yeast
Cluster 7129	1389448	1389450	3.447139028	Yeast
Cluster 7136	1515216	1515208	1.244714669	Yeast
Cluster 7137	1520293	1520285	0.0	Not_differential
Cluster 7139	1548664	1580727	1.28030472	Yeast
Cluster 7148	1487786	1487776	1.055065047	Yeast
Cluster 7153	1511243	1511240	-1.892658282	Mycelium
Cluster 7154	1514522	1514503	-1.390957714	Mycelium
Cluster 7155	1371392	1557900	-1.44602525	Mycelium
Cluster 7157	1541431	1541435	1.240320721	Yeast
Cluster 7160	1598298	1519845	-2.372049555	Mycelium
Cluster 7161	1294740	1555551	1.011859991	Yeast
Cluster 7163	1367006	1451021	2.099230661	Yeast
Cluster 7173	1484539	1484538	0.0	Not_differential
Cluster 7174	1454956	1582431	2.54374312	Yeast
Cluster 7174	1498099	1498092	0.0	Not_differential
Cluster 7176	1519845	1598298	0.0	Not_differential
Cluster 7182	1383337	1502080	1.417436443	Yeast
Cluster 7184	1448348	1564503	3.940695741	Yeast
Cluster 7185	1458306	1442680	2.451802177	Yeast
Cluster 7192	1586863	1586864	-1.447547299	Mycelium
Cluster 7197	1375730	1469780	0.0	Not_differential
Cluster 7201	1496982	1496978	-3.239228715	Mycelium
Cluster 7209	1342573	1538751	0.0	Not_differential
Cluster 7219	1584109	1376222	2.209280138	Yeast
Cluster 7221	1355516	1446132	-1.281681731	Mycelium
Cluster 7223	1396706	1557758	-2.632088343	Mycelium
Cluster 7228	1477490	1477485	1.636734958	Yeast
Cluster 7229	1485046	1485059	0.0	Not_differential
Cluster 7231	1506711	1384457	2.636972258	Yeast
Cluster 7236	1338814	1147435	4.743401203	Yeast
Cluster 7238	1354667	1595391	0.0	Not_differential
Cluster 7243	1484351	1484346	2.87338423	Yeast
Cluster 7243	1503237	1503235	2.413563523	Yeast
Cluster 7245	1549303	1549305	-1.066371865	Mycelium
Cluster 7246	1585777	1355173	-6.047671548	Mycelium
Cluster 7255	1542774	1542766	1.201900998	Yeast
Cluster 7257	1311981	1477825	0.0	Not_differential
Cluster 7265	1517468	1361789	0.0	Not_differential
Cluster 7266	1534867	1391229	0.0	Not_differential
Cluster 7268	1549723	1601069	-5.621529343	Mycelium
Cluster 7276	1350683	1471996	1.836696484	Yeast
Cluster 7282	1467419	1467407	-1.865963042	Mycelium
Cluster 7283	1476281	1476283	3.738067948	Yeast
Cluster 7286	1504993	1384061	0.0	Not_differential
Cluster 7291	1553454	1553453	-3.013255135	Mycelium
Cluster 7292	1592211	1346461	-1.432393002	Mycelium
Cluster 7294	1330660	1586191	0.0	Not_differential
Cluster 7299	1464965	1559527	0.0	Not_differential
Cluster 7301	1499826	1499830	1.693838642	Yeast
Cluster 7303	1524147	1524153	2.640025615	Yeast
Cluster 7305	1548061	1600907	-1.169307673	Mycelium
Cluster 7306	1566510	1533828	0.0	Not_differential
Cluster 7312	1525379	1363706	-1.256008393	Mycelium
Cluster 7322	1341214	1540624	-4.206518247	Mycelium
Cluster 7324	1455114	1372134	2.546468267	Yeast
Cluster 7325	1478363	1352156	2.235231795	Yeast
Cluster 7326	1509434	1509442	1.241646729	Yeast
Cluster 7327	1529059	1529057	1.320592885	Yeast
Cluster 7329	1539338	1539339	0.0	Not_differential
Cluster 7330	1484538	1484539	0.0	Not_differential
Cluster 7332	1568504	1553343	-2.27052158	Mycelium
Cluster 7335	1384061	1504993	1.416947371	Yeast
Cluster 7345	1538346	1150084	1.2342475	Yeast
Cluster 7346	1538476	1538472	1.500450314	Yeast
Cluster 7351	1463474	1463469	0.0	Not_differential
Cluster 7352	1484152	1353586	0.0	Not_differential
Cluster 7359	1528102	1528100	0.0	Not_differential
Cluster 7362	1375008	1467102	0.0	Not_differential
Cluster 7368	1519044	1519048	1.73831682	Yeast
Cluster 7370	1491681	1491684	1.228588489	Yeast
Cluster 7370	1537364	1148437	3.506520881	Yeast
Cluster 7371	1549732	1568132	3.017326995	Yeast
Cluster 7376	1410655	1485631	-2.518184448	Mycelium
Cluster 7380	1492673	1381038	-1.058624467	Mycelium
Cluster 7385	1551095	1551098	-2.741370812	Mycelium
Cluster 7391	1377954	1480113	-1.304438987	Mycelium
Cluster 7392	1382672	1499666	-2.01643812	Mycelium
Cluster 7398	1498481	1498488	-5.092806028	Mycelium
Cluster 7399	1504072	1504078	-2.768615374	Mycelium
Cluster 7424	1506296	1506294	0.0	Not_differential
Cluster 7425	1530136	1530130	-1.624981853	Mycelium
Cluster 7426	1538145	1538143	-4.541659102	Mycelium
Cluster 7427	1538633	1538632	1.293743979	Yeast
Cluster 7445	1455023	1455020	-1.01405705	Mycelium
Cluster 7447	1516247	1516250	1.338281144	Yeast
Cluster 7450	1410577	1056202	-2.145510252	Mycelium
Cluster 7453	1363063	1522732	1.497569653	Yeast
Cluster 7454	1395537	1551951	-7.728793849	Mycelium
Cluster 7457	1484021	1484020	-3.4415341	Mycelium
Cluster 7459	1492321	1492326	0.0	Not_differential
Cluster 7460	1494268	1494253	2.907054299	Yeast
Cluster 7460	1526250	1526248	2.178105422	Yeast
Cluster 7461	1542238	1542234	0.0	Not_differential
Cluster 7462	1551302	1601233	0.0	Not_differential
Cluster 7467	1356192	1381561	2.060830026	Yeast
Cluster 7469	1453209	1371485	0.0	Not_differential
Cluster 7470	1506803	1384491	0.0	Not_differential
Cluster 7473	1516801	1516804	0.0	Not_differential
Cluster 7484	1484020	1484021	0.0	Not_differential
Cluster 7486	1486260	1486264	2.06103834	Yeast
Cluster 7488	1499830	1499826	4.176261085	Yeast
Cluster 7493	1156571	1541792	-1.4341442	Mycelium
Cluster 7494	1435721	1502912	-1.10931498	Mycelium
Cluster 7500	1506249	1384361	1.122827167	Yeast
Cluster 7511	1332793	1447774	-3.008120378	Mycelium
Cluster 7511	1458792	1373068	-2.622438086	Mycelium
Cluster 7511	1544807	1544802	-2.158175867	Mycelium
Cluster 7512	1096820	1508116	-1.517533578	Mycelium
Cluster 7514	1384775	1507958	-1.438901728	Mycelium
Cluster 7519	1467697	1467693	0.0	Not_differential
Cluster 7523	1506660	1506663	-1.624014828	Mycelium
Cluster 7524	1517508	1517499	0.0	Not_differential
Cluster 7527	1590236	1538254	1.130005211	Yeast
Cluster 7533	1522550	1522544	-6.273824778	Mycelium
Cluster 7534	1484482	1379047	0.0	Not_differential
Cluster 7536	1456584	1456582	1.82546268	Yeast
Cluster 7536	1489534	1489536	-6.032326922	Mycelium
Cluster 7547	1489486	1489483	2.123549076	Yeast
Cluster 7548	1384074	1358715	2.395072312	Yeast
Cluster 7551	1483321	1378752	-1.936065226	Mycelium
Cluster 7556	1550023	1550019	1.448819188	Yeast
Cluster 7561	1446754	1446755	-6.309141938	Mycelium
Cluster 7569	1589881	1534504	1.373642762	Yeast
Cluster 7578	1456861	1456862	0.0	Not_differential
Cluster 7581	1522390	1522398	0.0	Not_differential
Cluster 7582	1525911	1525910	6.12055557	Yeast
Cluster 7586	1601432	1553376	0.0	Not_differential
Cluster 7592	1533801	1533808	3.158237989	Yeast
Cluster 7594	1496926	1574583	-3.733518856	Mycelium
Cluster 7600	1468830	1375481	2.487352497	Yeast
Cluster 7601	1486264	1486260	1.360192895	Yeast
Cluster 7607	1034856	1350665	0.0	Not_differential
Cluster 7621	1526143	1526140	0.0	Not_differential
Cluster 7625	1417419	1550742	0.0	Not_differential
Cluster 7626	1456622	1456624	6.979850098	Yeast
Cluster 7630	1523798	1523794	0.0	Not_differential
Cluster 7635	1544688	1544692	0.0	Not_differential
Cluster 7636	1546181	1546179	0.0	Not_differential
Cluster 7643	1520149	1520146	4.353813412	Yeast
Cluster 7644	1453651	1453654	7.164887676	Yeast
Cluster 7647	1501310	1586778	1.098613021	Yeast
Cluster 7648	1556997	1557000	5.670348728	Yeast
Cluster 7650	1352741	1378111	-1.107099986	Mycelium
Cluster 7652	1379270	1485399	-1.293277322	Mycelium
Cluster 7662	1588095	1361204	-8.784829888	Mycelium
Cluster 7666	1471082	1471086	-2.26408829	Mycelium
Cluster 7668	1497286	1306200	0.0	Not_differential
Cluster 7677	1100685	1510579	0.0	Not_differential
Cluster 7684	1139480	1532543	0.0	Not_differential
Cluster 7702	1463950	1463941	1.126390526	Yeast
Cluster 7704	1482171	1482164	-1.173716145	Mycelium
Cluster 7705	1495263	1495268	-2.597373208	Mycelium
Cluster 7707	1510097	1436541	1.960759703	Yeast
Cluster 7709	1515548	1515547	8.398356439	Yeast
Cluster 7711	1541652	1541639	0.0	Not_differential
Cluster 7714	1542607	1542603	-1.978081254	Mycelium
Cluster 7719	1484816	1484818	4.735575904	Yeast
Cluster 7721	1499344	1446869	0.0	Not_differential
Cluster 7724	1533184	1533178	0.0	Not_differential
Cluster 7736	1464209	1464200	-3.584379417	Mycelium
Cluster 7739	1551807	1551809	2.893315162	Yeast
Cluster 7740	1556687	1556688	0.0	Not_differential
Cluster 7744	1464620	1464628	1.089245446	Yeast
Cluster 7746	1499260	1499263	-3.593621923	Mycelium
Cluster 7753	1360410	1511833	2.743818922	Yeast
Cluster 7757	1453476	1453479	0.0	Not_differential
Cluster 7761	1520382	1598350	0.0	Not_differential
Cluster 7766	1365601	1533700	7.896378827	Yeast
Cluster 7771	1458814	1347705	3.280663211	Yeast
Cluster 7774	1519623	1117019	1.309469962	Yeast
Cluster 7778	1460200	1569885	-1.725241943	Mycelium
Cluster 7779	1462773	1374022	-1.412586485	Mycelium
Cluster 7783	1364035	1526714	1.908483593	Yeast
Cluster 7784	1369921	1550913	2.37631304	Yeast
Cluster 7791	1488939	1488944	0.0	Not_differential
Cluster 7794	1560238	1327596	2.177271548	Yeast
Cluster 7797	1358291	1503379	1.053575151	Yeast
Cluster 7801	1475924	1444467	1.809367066	Yeast
Cluster 7805	1591657	1552657	-1.281473505	Mycelium
Cluster 7808	1138061	1531745	2.807983178	Yeast
Cluster 7812	1411219	1490880	-5.485549653	Mycelium
Cluster 7818	1465736	1465738	-3.257682781	Mycelium
Cluster 7820	1478969	1478980	2.048533747	Yeast
Cluster 7823	1582344	1346320	2.024847092	Yeast
Cluster 7836	1447377	1504088	0.0	Not_differential
Cluster 7843	1448965	1519092	2.202867444	Yeast
Cluster 7845	1469780	1375730	0.0	Not_differential
Cluster 7846	1486686	1486703	-1.712013112	Mycelium
Cluster 7847	1494253	1494268	2.092402602	Yeast
Cluster 7847	1526248	1526250	1.849684858	Yeast
Cluster 7854	1442916	1460464	-1.662075537	Mycelium
Cluster 7856	1458152	1347525	-4.062320586	Mycelium
Cluster 7859	1478082	1326211	1.944521609	Yeast
Cluster 7864	1551098	1551095	0.0	Not_differential
Cluster 7865	1588304	1598065	0.0	Not_differential
Cluster 7872	1449377	1363150	0.0	Not_differential
Cluster 7878	1515885	1515886	0.0	Not_differential
Cluster 7881	1301999	1451707	-1.646611079	Mycelium
Cluster 7884	1357427	1596437	0.0	Not_differential
Cluster 7887	1478607	1478613	-1.037660264	Mycelium
Cluster 7888	1485870	1325216	-4.380798282	Mycelium
Cluster 7893	1541914	1541908	1.071123635	Yeast
Cluster 7897	1437007	1513881	1.61009944	Yeast
Cluster 7901	1458460	1458461	-2.455530262	Mycelium
Cluster 7903	1456394	1456382	2.252389172	Yeast
Cluster 7903	1516020	1386746	2.088056597	Yeast
Cluster 7905	1492038	1355512	0.0	Not_differential
Cluster 7910	1361981	1518325	0.0	Not_differential
Cluster 7918	1446213	1492774	-5.814186922	Mycelium
Cluster 7919	1451021	1367006	-2.681024621	Mycelium
Cluster 7923	1481333	1481330	-1.978334569	Mycelium
Cluster 7925	1488691	1488688	2.289446254	Yeast
Cluster 7927	1515547	1515548	7.103633364	Yeast
Cluster 7928	1525026	1525029	-4.374087858	Mycelium
Cluster 7935	1118177	1520295	1.648583552	Yeast
Cluster 7941	1533872	1533864	6.495499594	Yeast
Cluster 7948	1350925	1473055	1.277141072	Yeast
Cluster 7956	1501457	1447098	-3.154516735	Mycelium
Cluster 7957	1506979	1384539	0.0	Not_differential
Cluster 7959	1541162	1600237	2.671962267	Yeast
Cluster 7959	1555551	1294740	2.555183258	Yeast
Cluster 7964	1447522	1505577	0.0	Not_differential
Cluster 7968	1530668	1530667	1.207302447	Yeast
Cluster 7977	1504044	1587041	2.42613492	Yeast
Cluster 7977	1509116	1509123	2.344908605	Yeast
Cluster 7993	1508835	1508834	3.570490956	Yeast
Cluster 8003	1452985	1452990	-2.558513413	Mycelium
Cluster 8009	1536011	1599758	-2.870942962	Mycelium
Cluster 8020	1535786	1535789	1.143282693	Yeast
Cluster 8027	1496234	1496240	-1.708518792	Mycelium
Cluster 8030	1514282	1514283	1.762769601	Yeast
Cluster 8040	1489134	1489129	-1.100853111	Mycelium
Cluster 8043	1532147	1532156	3.112975187	Yeast
Cluster 8044	1540848	1540851	2.402861985	Yeast
Cluster 8045	1545975	1590953	0.0	Not_differential
Cluster 8046	1549036	1549038	1.329420182	Yeast
Cluster 8050	1448262	1512425	2.063768613	Yeast
Cluster 8052	1458787	1407899	1.723153766	Yeast
Cluster 8056	1467119	1467132	2.778908865	Yeast
Cluster 8067	1464505	1464498	2.197924162	Yeast
Cluster 8069	1479494	1479497	-1.239561615	Mycelium
Cluster 8070	1502128	1435626	0.0	Not_differential
Cluster 8071	1503136	1503128	-1.843019075	Mycelium
Cluster 8073	1552209	1452377	0.0	Not_differential
Cluster 8078	1346483	1454771	0.0	Not_differential
Cluster 8080	1505112	1505111	2.52551677	Yeast
Cluster 8087	1551529	1551524	1.335821934	Yeast
Cluster 8095	1452573	1553967	0.0	Not_differential
Cluster 8097	1470272	1470274	0.0	Not_differential
Cluster 8098	1503668	1447330	-2.843766402	Mycelium
Cluster 8104	1161672	1545208	1.957791836	Yeast
Cluster 8107	1363839	1525957	0.0	Not_differential
Cluster 8108	1393955	1580386	0.0	Not_differential
Cluster 8114	1062574	1379894	-2.237633924	Mycelium
Cluster 8118	1469614	1469624	2.512817539	Yeast
Cluster 8118	1544868	1544870	2.735762245	Yeast
Cluster 8124	1530220	1530228	2.160309836	Yeast
Cluster 8127	1553453	1553454	0.0	Not_differential
Cluster 8135	1470806	1470803	2.352423149	Yeast
Cluster 8136	1471086	1471082	-2.57418022	Mycelium
Cluster 8137	1473169	1432223	5.918510627	Yeast
Cluster 8140	1517212	1517215	-1.012877903	Mycelium
Cluster 8148	1359524	1508379	0.0	Not_differential
Cluster 8153	1466820	1466826	1.204782866	Yeast
Cluster 8157	1518596	1518590	1.539711058	Yeast
Cluster 8158	1521050	1388014	-1.931252513	Mycelium
Cluster 8160	1538776	1538783	0.0	Not_differential
Cluster 8164	1590953	1545975	1.815534661	Yeast
Cluster 8173	1496105	1496098	1.673558849	Yeast
Cluster 8173	1530624	1530619	-1.279692788	Mycelium
Cluster 8174	1534357	1534358	-3.95304559	Mycelium
Cluster 8187	1468525	1375392	-1.145947333	Mycelium
Cluster 8189	1545304	1545305	2.440013714	Yeast
Cluster 8195	1147999	1579262	-2.399802261	Mycelium
Cluster 8200	1494762	1494771	0.0	Not_differential
Cluster 8201	1476619	1351740	1.436931895	Yeast
Cluster 8213	1394045	1546254	2.230926939	Yeast
Cluster 8213	1449310	1522510	4.652140556	Yeast
Cluster 8222	1324337	1353499	-1.374530358	Mycelium
Cluster 8224	1378111	1352741	-1.083306243	Mycelium
Cluster 8237	1497033	1497021	-2.167880189	Mycelium
Cluster 8237	1520803	1520795	-1.596388851	Mycelium
Cluster 8237	1520824	1520832	1.524179165	Yeast
Cluster 8239	1538215	1538212	4.732058602	Yeast
Cluster 8244	1497047	1446665	2.747025969	Yeast
Cluster 8246	1499893	1382732	0.0	Not_differential
Cluster 8256	1464386	1593109	1.622216054	Yeast
Cluster 8258	1293609	1455688	-1.042525074	Mycelium
Cluster 8262	1476301	1377029	-3.044424196	Mycelium
Cluster 8274	1171205	1395147	1.00943303	Yeast
Cluster 8275	1409192	1375876	0.0	Not_differential
Cluster 8295	1550121	1550122	0.0	Not_differential
Cluster 8299	1459635	1459633	0.0	Not_differential
Cluster 8302	1467494	1467502	3.53481022	Yeast
Cluster 8304	1504088	1447377	0.0	Not_differential
Cluster 8305	1533864	1533872	1.21404539	Yeast
Cluster 8310	1446221	1492984	0.0	Not_differential
Cluster 8312	1462137	1462138	1.786267155	Yeast
Cluster 8313	1465728	1465731	0.0	Not_differential
Cluster 8315	1478613	1478607	0.0	Not_differential
Cluster 8320	1412116	1499609	-4.346110944	Mycelium
Cluster 8324	1456983	1442540	0.0	Not_differential
Cluster 8326	1533727	1533721	6.117316466	Yeast
Cluster 8331	1538783	1538776	-1.321300033	Mycelium
Cluster 8332	1556604	1345849	-2.270717936	Mycelium
Cluster 8333	1493143	1493149	3.143051667	Yeast
Cluster 8335	1601055	1549544	0.0	Not_differential
Cluster 8338	1414357	1520884	-9.297240369	Mycelium
Cluster 8339	1465482	1465479	-1.598372527	Mycelium
Cluster 8341	1473880	1560462	3.313724266	Yeast
Cluster 8345	1533789	1533794	0.0	Not_differential
Cluster 8346	1536873	1536870	-2.422636179	Mycelium
Cluster 8349	1444433	1475563	0.0	Not_differential
Cluster 8351	1520795	1520803	-2.142376903	Mycelium
Cluster 8351	1520832	1520824	1.865391236	Yeast
Cluster 8352	1600367	1542492	2.669640416	Yeast
Cluster 8362	1454556	1454558	-1.556985549	Mycelium
Cluster 8363	1363003	1522533	2.472296105	Yeast
Cluster 8370	1544692	1544688	0.0	Not_differential
Cluster 8371	1547091	1368942	0.0	Not_differential
Cluster 8389	1513364	1513369	4.878613938	Yeast
Cluster 8399	1552589	1395723	2.756725245	Yeast
Cluster 8400	1554964	1554971	0.0	Not_differential
Cluster 8404	1375876	1409192	0.0	Not_differential
Cluster 8410	1509220	1509223	0.0	Not_differential
Cluster 8411	1524442	1524435	3.783681398	Yeast
Cluster 8422	1513940	1576505	0.0	Not_differential
Cluster 8434	1407899	1458787	0.0	Not_differential
Cluster 8434	1410203	1481140	0.0	Not_differential
Cluster 8440	1437098	1437097	0.0	Not_differential
Cluster 8443	1526022	1526026	1.918012705	Yeast
Cluster 8445	1568382	1552096	2.82512924	Yeast
Cluster 8452	1448051	1510547	-3.244278403	Mycelium
Cluster 8454	1524768	1524773	-1.160058433	Mycelium
Cluster 8468	1491432	1491431	-5.307062731	Mycelium
Cluster 8469	1511495	1564306	0.0	Not_differential
Cluster 8471	1534957	1391253	-1.409795301	Mycelium
Cluster 8475	1474386	1474382	0.0	Not_differential
Cluster 8476	1475750	1376907	-1.706518176	Mycelium
Cluster 8478	1492984	1446221	-2.464664785	Mycelium
Cluster 8479	1523329	1363211	1.421599212	Yeast
Cluster 8482	1552564	1552560	2.634930977	Yeast
Cluster 8483	1549737	1568134	2.29011121	Yeast
Cluster 8485	1440052	1540169	-3.738674452	Mycelium
Cluster 8487	1466543	1466541	2.759874014	Yeast
Cluster 8490	1327113	1292418	0.0	Not_differential
Cluster 8495	1510547	1448051	2.083293474	Yeast
Cluster 8495	1532163	1365262	2.401742314	Yeast
Cluster 8497	1589649	1578668	1.902861965	Yeast
Cluster 8500	1448224	1448225	-15.31805596	Mycelium
Cluster 8504	1392454	1367109	0.0	Not_differential
Cluster 8507	1550392	1452191	0.0	Not_differential
Cluster 8508	1456539	1592381	0.0	Not_differential
Cluster 8508	1568545	1601462	0.0	Not_differential
Cluster 8511	1470026	1470027	2.39624741	Yeast
Cluster 8519	1150084	1538346	0.0	Not_differential
Cluster 8521	1350093	1350091	2.409045856	Yeast
Cluster 8527	1447584	1506145	-4.668639848	Mycelium
Cluster 8528	1489299	1489301	2.968306728	Yeast
Cluster 8529	1508251	1508248	0.0	Not_differential
Cluster 8540	1507958	1384775	0.0	Not_differential
Cluster 8543	1375392	1468525	-1.105952628	Mycelium
Cluster 8553	1394564	1548221	1.437598322	Yeast
Cluster 8561	1494709	1595950	-1.37776058	Mycelium
Cluster 8568	1585609	1489161	-1.855792675	Mycelium
Cluster 8569	1586247	1446501	-3.475263248	Mycelium
Cluster 8571	1056202	1410577	0.0	Not_differential
Cluster 8573	1358920	1505851	1.464733365	Yeast
Cluster 8576	1459364	1459363	1.13191206	Yeast
Cluster 8577	1460595	1460598	1.735640327	Yeast
Cluster 8581	1483066	1483069	1.909938815	Yeast
Cluster 8587	1584509	1477123	-1.492219369	Mycelium
Cluster 8589	1013639	1460757	0.0	Not_differential
Cluster 8591	1382007	1382004	0.0	Not_differential
Cluster 8593	1490522	1411183	1.053495707	Yeast
Cluster 8604	1451707	1301999	-1.639061912	Mycelium
[truncated: 93 more rows]
